# Supplementary material for: Temporal Transcriptional Profiling of Somatic and Germ Cells Reveals Biased Lineage Priming of Sexual Fate in the Fetal Mouse Gonad
Source: PLoS Genet. 2012 Mar 15;8(3):e1002575. doi: 10.1371/journal.pgen.1002575 (PMC3305395; doi:10.1371/journal.pgen.1002575)
Supplement: Dataset S1 — RMA normalized values and intensity value graphing. We provided an excel file with (A) the log-transformed RMA normalized intensity values used in our analysis and (B) the graphic format used to display gene expression in each cell type over time. The user can copy any row from (A) with values into row 2 of (B) (yellow) to generate the graph for that gene. Only transcript clusters included in the analysis are provided, and the grounds for removing transcript clusters are provided in the Materials and Methods. (XLSX) [file pgen.1002575.s001.xlsx]

## Sheet: (A) RMA values
Gene Symbol	11FlkF1	11FlkF2	11FlkF3	11FlkM1	11FlkM2	11FlkM3	11MafF1	11MafF2	11MafF3	11MafM1	11MafM2	11MafM3	11OctF1	11OctF2	11OctF3	11OctM1	11OctM2	11OctM3	11SryF1	11SryF2	11SryF3	11SryM1	11SryM2	11SryM3	12FlkF1	12FlkF2	12FlkF3	12FlkM1	12FlkM2	12FlkM3	12MafF1	12MafF2	12MafF3	12MafM1	12MafM2	12MafM3	12OctF1	12OctF2	12OctF3	12OctM1	12OctM2	12OctM3	12SryM1	12SryM2	12SryM3	12SryF1	12SryF2	12SryF3	13FlkF1
0610007C21Rik	8.6424	8.92268	8.24184	9.11748	7.66584	7.49302	8.4375	8.75485	8.48059	8.46443	8.3339	8.27444	7.43565	7.61132	7.7333	7.46138	7.28643	7.68183	8.58482	8.36285	8.42408	7.9055	8.54519	8.32611	9.33347	8.24021	8.23171	8.60674	8.68344	8.29715	8.2583	8.92273	8.49007	8.32831	8.72705	8.33247	7.92991	8.33202	7.57934	7.33349	8.20765	6.6089	8.70534	9.09605	8.90473	8.68098	8.40064	8.3868	8.44384
0610007L01Rik	8.76931	8.39936	8.83701	8.66143	7.94356	8.60839	8.58556	8.65528	8.62324	8.74798	8.37241	8.9999	9.09979	8.98379	9.29583	9.64328	9.31103	9.2853	8.88577	8.42922	8.39802	8.64025	9.16892	8.93479	8.52038	8.61829	8.75874	8.70782	8.81623	8.50272	7.75049	8.55392	8.32969	8.50096	8.36385	8.73875	9.21134	9.21352	9.12152	9.31367	9.34712	9.25225	9.61395	9.49901	9.30539	8.48095	8.29195	8.42014	8.48836
0610007P08Rik	7.42072	7.29286	7.40799	7.54447	7.68636	7.36058	7.72193	7.32882	7.99602	8.01469	7.85547	8.20273	8.30449	8.37745	8.42956	8.5624	8.35502	8.33195	7.49497	7.08631	7.2812	7.66218	7.97213	7.58647	7.57658	7.84005	6.67379	7.58206	7.52682	7.44843	7.763	7.80449	8.27825	8.35701	8.18354	8.31759	8.66806	8.63257	8.64521	8.58871	8.45566	8.21134	7.82553	7.72047	7.86717	7.5185	7.52559	7.72609	7.46366
0610007P08Rik	7.65992	7.86495	7.91964	7.74855	7.49256	8.5562	8.23889	8.06277	8.45186	8.21736	8.18199	8.58042	7.98755	8.50033	8.49442	8.94217	8.78022	8.69673	7.89372	7.71413	7.86379	6.9741	8.17285	8.22579	7.52136	8.1848	8.40754	7.9684	8.03846	7.91835	8.32096	8.27754	8.27362	8.26415	8.39474	8.67705	8.52796	8.46659	8.70353	8.55951	8.33076	8.43678	8.02608	8.17055	8.12168	8.09477	8.17399	8.01981	7.12179
0610007P14Rik	9.80159	10.0885	9.78487	10.0494	9.17298	9.04026	10.0891	10.353	10.0051	10.3224	10.4274	9.78829	11.1869	10.9469	11.0177	11.0929	11.1673	11.0759	9.18291	9.59132	9.64914	10.2254	10.3706	10.1507	10.0632	9.95648	9.06193	9.90088	9.9258	9.72424	10.2723	10.1202	8.98425	9.17753	10.3049	10.4864	10.7567	10.3851	10.4731	10.6262	10.9509	10.6313	9.9186	10.7758	10.6223	9.23357	10.0533	9.80812	9.51803
0610007P22Rik	5.96815	6.00412	5.96428	5.96599	5.98597	6.06229	6.09967	6.11432	6.31902	6.103	6.17473	6.2087	6.27176	6.21288	6.34657	6.25899	6.2463	6.1322	6.10237	6.12686	6.00405	6.23525	6.21153	6.14289	5.86554	5.87271	5.92083	5.98725	5.99203	5.99575	6.09482	6.11066	6.19233	6.18166	6.06513	6.13299	6.11683	6.14152	6.106	6.11734	6.03439	6.05767	6.12393	6.174	6.1162	6.07187	6.31549	6.10752	6.11571
0610009B22Rik	10.634	11.0754	10.298	10.9216	10.8869	9.9645	10.9916	10.5652	11.0167	11.0371	11.1524	10.5106	10.7674	11.0664	10.774	11.1145	10.9887	10.9377	11.1913	11.1218	11.391	10.6373	11.0967	10.97	10.7907	10.0423	10.2604	10.5362	10.4968	10.707	10.8895	10.9721	10.454	10.6861	10.9878	10.8041	11.0082	10.5381	10.1293	11.1176	11.0805	10.9508	11.0144	11.0196	10.875	11.1384	11.5593	11.1928	10.852
0610009D07Rik	9.87157	9.93888	9.90044	9.96188	9.9811	9.18292	9.61745	9.63388	9.77813	9.76261	9.36777	9.21883	9.57656	9.7948	9.7456	9.69666	9.95918	9.82493	9.40648	9.37243	9.67627	9.14592	9.29751	9.3569	9.87222	9.30892	9.75626	9.32442	9.6716	9.75911	9.10187	9.52194	8.61487	8.87989	9.37464	9.23671	9.55593	9.11998	9.38901	9.89428	9.86199	9.54471	9.29161	9.11601	9.06869	9.17064	8.77043	9.48102	9.08505
0610009L18Rik	6.47228	6.38242	6.33023	6.4386	6.71857	6.28238	6.4103	6.35771	6.57184	6.55012	6.4658	6.31859	6.10181	6.35738	6.41888	6.15759	6.2275	6.24658	7.05161	6.70986	6.98764	6.93018	6.57376	6.80709	6.15006	6.06368	6.38119	6.63958	6.45118	6.27016	6.15988	6.64438	6.82153	6.58884	7.01182	6.43037	6.18724	6.45186	6.22333	6.39654	6.12885	6.10027	6.77575	6.27592	6.37782	7.03038	7.16489	7.06056	6.22875
0610009O20Rik	6.05238	5.9755	6.03245	6.11516	6.17529	6.16995	6.17891	5.98993	5.96577	6.04493	5.86444	6.17908	6.02473	5.75399	5.93776	6.14393	6.03889	5.95395	6.14381	6.2012	6.08463	6.1617	6.2784	6.31832	5.92357	6.23229	6.24595	6.17943	5.96688	5.97103	5.93565	6.23396	5.94391	6.0639	5.91755	5.93994	5.94503	5.72959	5.96348	6.08668	5.90999	6.12453	6.16097	6.21731	6.19269	6.15964	6.35953	6.18012	5.84105
0610010F05Rik	8.94755	8.94261	8.62498	8.77931	7.21461	8.48962	8.2005	8.01911	8.64528	8.37397	8.10989	8.39963	7.49367	8.30632	7.88407	7.63979	7.64343	7.84727	8.64142	7.85499	7.91827	8.48195	8.63409	8.63761	8.45872	8.51023	9.01095	8.28185	8.85037	8.95872	8.43654	8.43617	8.34	8.22593	8.00931	8.47628	8.18846	8.56955	8.51552	8.24493	8.3653	8.58777	8.56719	8.71676	8.72665	9.14164	8.85288	9.19551	8.50436
0610010K06Rik	9.65839	9.67146	9.57385	9.70541	9.4616	9.02837	9.62414	8.71379	9.44045	9.43957	9.32391	9.71092	8.29344	8.32452	8.21018	8.59582	8.01047	9.11915	9.3214	9.84822	10.1591	9.4017	9.30223	9.92686	10.0229	9.5233	10.3811	9.83035	9.77474	9.96331	9.44174	9.59395	10.3195	8.94	9.53773	9.57678	8.19055	8.18446	8.18757	8.63365	8.64371	8.44751	9.82827	9.51152	9.81979	10.1147	10.1409	9.74352	9.64893
0610010K14Rik	9.21952	9.26139	9.57185	9.38897	10.176	9.01729	8.13712	8.22633	7.80214	8.56305	8.3666	7.80359	9.36314	9.3399	9.17548	9.3196	9.36983	9.07601	7.42541	7.95687	7.64924	7.50801	7.37774	7.82124	9.06743	9.73225	9.37497	8.89735	9.13357	9.18439	7.77203	8.27378	7.86272	7.54926	8.21805	7.8755	9.44017	9.26705	8.71128	9.27493	9.2936	8.836	7.96619	7.80964	7.7995	7.93916	7.77724	7.8804	8.90094
0610011F06Rik	6.44723	6.5994	6.53035	6.33059	6.83138	6.5501	6.513	6.66712	6.55984	6.49426	6.52719	6.38346	6.49044	6.49638	6.40888	6.15059	6.51808	6.51826	6.72368	7.1984	7.19753	6.58602	6.76263	6.85488	6.28378	6.66702	6.67438	6.66828	6.5353	6.87256	6.76279	6.75088	6.57696	6.64639	6.57434	6.77669	6.57989	6.4279	6.70997	6.08842	6.42572	6.39962	7.06676	7.0408	7.20386	6.86949	7.45099	7.23765	6.77433
0610011L14Rik	6.80997	7.23087	7.21521	7.20402	7.16684	7.10645	7.15953	7.39452	7.24004	7.04025	7.07669	7.1741	7.60218	7.61925	7.25731	7.36394	7.5809	7.50997	7.22304	7.20778	7.26465	6.99344	7.00635	7.01286	7.03449	7.07915	7.08974	7.05169	7.15499	7.35451	7.07184	7.2369	6.96918	7.11813	7.30565	7.25638	7.54697	7.46039	7.65363	7.68939	7.5603	7.57842	6.79815	7.02931	7.27447	7.07482	7.11906	7.08867	7.09753
0610012G03Rik	8.4285	9.32298	9.15217	8.77656	9.79914	9.01574	7.91536	8.26714	8.10142	8.27542	8.00961	7.17736	7.90668	7.37024	7.73944	7.64767	7.86722	6.98699	8.22159	8.03923	7.86031	7.33525	8.03177	7.95191	8.56422	9.54661	8.80653	8.17501	8.54801	8.51439	7.99535	8.36109	7.75912	7.43937	7.9018	7.52741	7.14054	7.5849	6.98232	7.6453	7.36546	6.68281	8.23808	7.85928	7.42991	8.0422	8.13037	7.98479	8.2356
0610030E20Rik	5.89705	5.88829	5.7723	5.79638	5.49341	6.02491	6.26167	6.24466	6.5177	6.24297	6.00574	6.0856	6.04805	6.04214	6.15616	5.91785	6.08827	6.13477	6.10041	5.91782	5.5335	5.66641	6.00636	5.89302	6.1849	5.90749	5.76597	5.96779	5.95172	6.01448	6.04394	6.18085	6.28694	6.35297	6.11747	6.57209	5.95212	5.95411	5.86316	6.07752	6.14801	6.17215	6.09607	6.50043	6.03944	5.94108	5.9814	5.92222	5.97484
0610031J06Rik	8.35983	8.33252	8.09852	8.47517	7.35059	7.41402	7.99611	7.74039	7.69925	7.68884	7.75555	8.01867	7.57494	7.65586	7.54578	7.97824	7.75673	7.54209	7.98924	7.44584	7.6409	7.78479	7.76644	7.95811	8.68505	8.16613	6.94519	8.00712	8.01045	7.92229	7.8213	7.85285	7.62273	7.32445	7.75658	7.78071	7.61416	7.57085	7.60343	7.89179	7.63837	7.62941	8.25441	8.70449	8.51283	7.79104	7.47534	7.89887	7.57841
0610037L13Rik	9.33175	9.67353	9.5324	9.46152	9.45452	8.75954	9.06365	9.24434	9.20806	9.14202	9.35473	9.37321	9.14072	9.29389	9.29075	9.43748	9.18064	8.97533	9.02003	8.92942	8.85625	8.97332	8.90059	8.80264	9.50066	9.00871	9.38574	9.24971	9.48249	9.46552	9.34233	9.21463	9.32338	9.14991	9.44237	9.29248	9.22209	9.25973	9.27073	9.17093	9.37255	9.0651	8.93426	9.0067	9.20682	8.98909	8.69195	8.75975	9.48301
0610037P05Rik	7.94683	8.19264	8.14427	7.95657	7.88246	7.9073	8.28745	8.30929	8.25959	8.39416	8.65214	8.19527	8.0733	8.04099	8.34773	8.16149	8.19118	8.21695	9.32135	8.9647	8.97837	8.20403	8.1716	8.54806	8.26818	7.14686	7.8149	7.96852	8.2111	7.70656	8.73043	8.57281	8.73189	8.82465	8.46908	8.55041	8.12622	8.47669	8.49509	8.01721	8.38115	8.13677	9.37496	8.21205	8.44673	9.2725	8.85461	8.58379	7.89027
0610040B10Rik	6.31195	6.47041	7.34385	6.69736	6.24686	6.7827	6.79961	7.68644	6.46127	6.4463	6.10119	6.96156	7.27835	7.71463	7.61781	7.78402	6.41877	6.38836	7.31793	6.54233	7.38433	6.60377	6.73867	7.93777	6.91097	6.40841	6.72551	6.50333	6.58198	6.75942	6.21432	7.42334	7.01941	6.3167	7.47681	6.48405	6.98891	5.94657	7.19145	6.96541	6.91169	6.09023	6.60208	6.12187	6.30235	7.39231	6.34066	6.79518	6.80857
0910001L09Rik	7.55097	7.82859	7.52371	7.58144	8.18362	8.12528	7.50785	7.59639	7.63499	7.66347	7.36982	7.47087	7.96687	8.30907	8.02236	8.08844	8.1339	7.76196	8.20735	7.92115	7.84079	7.58494	7.94677	7.73036	7.29882	7.66287	7.65275	7.28399	7.50967	7.29977	8.11357	7.94941	7.79229	7.2211	7.95856	7.57283	8.20446	8.19	7.80524	8.04321	8.1762	7.91271	7.83021	7.72162	7.78643	7.94268	8.44257	8.10063	7.53261
1110001A16Rik	7.36106	7.93233	8.28054	7.7748	7.74881	7.95542	7.14282	7.63515	7.55392	7.27642	7.72552	7.02591	8.02385	8.0288	8.25995	8.14968	8.57164	7.86994	7.40567	6.95433	6.98217	5.99248	7.00252	7.28431	7.79555	7.61163	7.38511	7.44166	7.60191	7.47345	7.52406	7.62752	7.49957	7.02728	7.88868	7.36628	8.65891	8.879	8.40749	7.83168	7.57079	7.76877	6.77934	6.99887	6.88455	6.67837	6.54451	7.35184	7.67392
1110002B05Rik	12.2318	12.0722	11.971	12.255	12.1526	12.1695	12.203	12.1412	12.4513	12.1176	12.2173	12.2948	11.8042	11.8031	11.7961	11.7627	11.619	11.6182	11.9956	11.9825	11.8439	12.1115	12.0376	12.0422	12.2267	12.326	12.0984	12.2385	12.0198	12.0409	12.1112	12.1527	12.0149	12.1408	12.1952	12.0702	11.6919	11.8134	11.8119	11.2456	11.1308	11.3199	12.0791	12.2509	11.9767	12.0756	12.4906	12.2679	12.5418
1110002L01Rik	6.11346	5.80553	5.77139	6.04722	6.75619	6.35683	6.1914	6.80334	7.02082	6.51633	5.82243	6.35234	5.81119	6.42768	5.97371	6.96553	5.41521	6.56453	5.98943	7.42962	5.89448	5.41329	6.23467	6.39777	6.19388	6.39938	6.57575	6.11681	5.5128	5.89846	7.08498	7.02311	5.82768	5.92781	6.76972	6.70113	6.00029	5.68581	5.57729	6.16107	5.74697	6.49846	6.3305	6.75673	8.17303	6.45751	5.82033	6.42624	5.87606
1110002N22Rik	8.06278	7.81582	7.97444	7.8548	7.81096	8.00904	7.81329	8.19416	8.39523	8.1911	8.13947	7.89994	9.11686	9.68655	9.61156	9.40302	9.47904	9.64433	8.27861	7.90797	8.40724	6.89542	8.04739	8.13658	7.60031	7.43437	7.30996	7.95865	7.95298	7.77737	8.19941	8.15559	7.69869	8.30063	8.15613	7.77044	9.5116	9.13226	9.02918	9.75894	9.65127	9.60832	8.23561	8.18198	8.34783	8.39425	8.20591	8.43536	7.76399
1110003E01Rik	7.79578	7.96784	7.50825	7.87091	7.87419	7.57949	7.90672	8.15395	7.84912	8.06379	8.02947	7.96001	7.39942	7.05911	7.06498	7.45741	7.06898	7.17358	8.59053	8.11197	8.67019	8.24179	8.42723	8.60724	8.18005	8.32403	7.89864	7.70728	7.52698	7.6788	8.28965	8.12159	8.09002	7.68877	7.83222	7.69675	7.08653	7.40908	7.54589	7.3101	7.51524	7.03217	7.80843	8.4814	8.07954	8.52417	8.64467	8.34102	8.7772
1110003O08Rik	6.20257	5.96295	6.31663	6.16715	6.0443	6.24378	6.18217	6.16003	6.40756	6.12696	6.61072	6.27843	6.84459	6.63609	6.92467	6.62998	6.58718	6.96079	6.16852	6.09845	5.966	6.07568	6.13873	5.98694	6.03421	6.1098	6.26464	6.46776	5.99738	6.13929	6.2874	6.21563	6.07016	6.18487	6.4374	7.05054	6.47428	6.91365	7.12641	6.99456	6.60047	6.93883	6.06058	6.5149	5.82958	5.98872	5.94202	6.12053	5.99591
1110004E09Rik	8.85791	8.89623	9.04042	8.87697	9.25447	8.68796	8.33969	8.48862	8.66943	8.51216	8.76237	8.66998	9.72699	9.97736	10.1831	9.73886	9.75663	9.91714	8.19318	8.30508	8.25659	8.6322	8.63625	8.40612	8.96674	8.46505	8.96661	8.79686	8.97619	9.11859	8.73497	8.48047	8.99114	8.66885	8.32029	8.50198	9.95949	10.2746	9.99733	9.93885	9.84323	10.1775	8.45563	8.90119	8.7002	8.51153	9.25463	8.65135	9.21267
1110004F10Rik	9.87947	10.264	10.1554	10.328	10.0576	9.60383	10.1375	10.2619	10.3763	10.4173	10.2542	10.1055	10.4244	10.544	10.558	10.3746	10.3391	10.4008	9.80792	9.60207	9.82424	9.76155	10.0226	10.1293	10.5095	9.60198	10.0543	10.0518	10.1854	10.0265	10.1573	10.2341	10.0008	9.84328	10.1565	10.3427	10.3532	10.4041	10.3323	10.429	10.3066	10.361	10.2536	10.5349	10.2075	9.77995	9.86111	9.84523	9.9856
1110005A03Rik	8.31207	8.51085	8.81184	8.46379	9.40649	8.81944	8.39097	8.37817	8.24176	8.41369	8.41307	8.22024	8.47102	8.49794	8.74328	8.76978	8.74825	8.60793	8.48535	8.33601	8.47835	8.23721	8.3989	8.54244	8.56751	8.61524	8.51244	8.5088	8.36078	8.29576	8.22487	8.30693	8.31618	8.32607	8.25503	8.15173	8.30821	8.57403	8.60824	8.44785	8.68466	8.59403	8.41369	8.3208	8.11807	8.30127	8.58636	8.64352	8.78567
1110007A13Rik	9.35207	9.38165	9.29048	9.43975	9.19993	9.29632	9.48006	9.2893	9.31602	9.43207	9.49949	9.59509	9.97569	9.87762	10.0092	9.98217	9.8575	9.85616	8.90689	9.25689	8.50023	9.78117	9.41401	9.23497	9.22177	9.63923	9.0865	9.24744	9.33839	9.22116	9.45741	9.50658	9.38963	9.39777	9.49776	9.63929	10.1631	10.328	10.2958	10.2068	10.141	10.2293	9.45798	9.52682	9.64662	9.33196	8.94442	8.97428	9.57862
1110007C09Rik	5.85136	5.80691	5.89244	5.91106	5.823	5.69671	5.52488	5.70848	5.5414	5.49254	5.41924	5.33254	5.33359	5.27375	5.3428	5.34163	5.40727	5.25276	5.54972	5.33181	5.47392	5.47437	5.45005	5.36426	6.07806	5.84666	6.01869	5.89708	5.79378	5.78434	5.40152	5.76306	5.39666	5.39662	5.76838	5.41896	5.52879	5.70856	5.32171	5.29808	5.4807	5.33762	5.60764	5.61454	5.31436	5.41116	5.54051	5.46435	6.30164
1110008F13Rik	10.0844	10.265	9.97959	10.3053	10.4634	9.91977	9.82419	9.97232	10.0644	10.0896	10.0349	9.99495	10.6447	10.282	10.3895	10.2021	10.4113	10.2547	9.84531	9.99825	10.2261	10.6909	10.6856	10.425	9.78661	9.88086	9.87838	10.2575	9.91748	9.77299	9.97463	9.86645	9.39548	10.1865	10.1316	9.87053	10.1359	10.1996	9.94106	10.4043	10.246	10.2329	10.5908	10.689	10.6272	9.96179	9.77313	10.1972	9.92497
1110008L16Rik	8.60957	8.75043	8.5048	8.92804	7.63795	8.23973	8.55555	8.52444	8.79561	8.54455	8.40734	8.31091	9.64724	9.6687	9.65812	9.87033	9.8899	9.65673	8.57568	8.7916	9.0056	8.651	8.66442	8.64413	8.90598	8.1601	7.93846	8.62114	8.31941	8.27759	8.74511	8.01427	8.32749	8.29838	8.47607	8.39906	9.8545	9.69899	9.84245	9.70287	9.69682	9.78454	8.82041	8.92303	8.74367	8.3905	8.31856	8.60302	8.36542
1110012D08Rik	6.99075	6.81067	6.63585	6.89042	7.12402	7.09153	6.54904	6.36724	6.40799	6.43498	6.34317	6.55871	6.20086	6.40016	6.1634	6.24475	6.10456	6.05637	6.60689	6.96034	6.44829	6.66633	6.55521	6.69983	7.08537	7.2766	7.16734	6.78172	6.92339	6.75264	6.73231	6.45054	6.89421	6.46866	6.61021	6.4516	5.97594	6.04416	6.06368	6.24366	6.20319	6.13597	6.63234	6.61187	6.82962	6.84283	6.60233	6.53157	7.57361
1110012J17Rik	6.33288	6.21907	6.39846	6.28268	6.56	6.45194	6.55646	6.7996	6.58879	6.47567	6.6731	6.7089	6.61397	6.61188	6.60766	6.41929	6.41888	6.48825	7.03671	7.32317	7.2832	7.20226	7.01193	7.22669	6.34897	6.31111	6.48816	6.3365	6.15528	6.24879	6.82279	6.69894	6.84013	6.63876	6.44364	6.56477	6.48575	6.59855	6.74584	6.55264	6.46338	6.60517	7.22492	7.34325	7.51632	7.19818	7.27932	7.03902	6.30614
1110012L19Rik	8.93372	9.19385	8.86716	9.5326	8.89635	8.60913	8.98188	8.93453	9.55388	8.96574	9.27915	9.36583	8.53913	9.73428	9.47329	9.02222	9.24758	9.61388	10.1169	8.73959	8.80058	9.06262	9.30359	9.63756	8.10121	8.62547	7.80259	8.12022	8.87136	8.57723	9.27604	9.51452	8.7804	7.84306	8.47744	8.59217	9.64013	9.91786	9.83377	9.31294	8.89479	9.32267	9.04176	9.85831	9.0929	9.11258	9.22712	9.28836	9.25604
1110014N23Rik	7.2359	7.14082	7.08676	6.95086	7.20774	6.99402	7.0222	6.93653	7.09996	6.97514	7.24188	6.85247	6.92177	7.17224	7.1064	6.88889	7.07556	6.9356	7.09446	6.93046	7.22785	7.5295	7.17666	7.14599	6.81634	7.0418	6.91475	6.98045	6.89333	7.00734	7.26958	7.07963	7.00251	7.28481	7.19794	7.06347	6.87767	7.09294	6.96798	7.0088	7.04337	6.80422	7.21215	7.11692	7.06033	6.96673	7.8211	7.14725	6.96414
1110017F19Rik	6.30547	6.40216	6.28606	6.16187	6.47996	6.42204	6.82333	6.79137	6.49253	6.78118	6.67662	6.75086	6.66586	6.39961	6.70115	6.76882	6.44068	6.80059	6.97576	6.79542	6.39639	6.81709	6.58462	6.49346	6.30097	6.29459	6.24423	6.32368	6.39741	6.47016	6.87147	6.6989	6.73856	6.63635	6.85689	6.4288	6.45112	6.88316	6.64657	6.56492	6.62077	6.64292	6.45776	6.11212	6.34252	6.87713	6.59113	6.70439	6.46424
1110018G07Rik	7.67562	7.86846	7.57539	7.9263	8.13963	7.36627	8.0847	8.15804	8.10194	7.94038	8.44959	8.49326	8.26536	8.27236	8.65793	8.57509	8.24799	8.41125	8.22711	7.96743	8.01646	8.58859	8.32172	8.37976	7.87231	7.5659	7.39133	7.88105	8.00457	7.87933	7.87811	8.12969	7.97916	8.37359	8.16696	8.14167	8.55013	8.65485	8.59599	8.53977	8.87248	9.05699	7.8396	8.07477	8.31564	8.19576	8.11991	8.17525	8.08263
1110018J18Rik	7.86404	7.69956	7.24755	7.99004	6.56787	7.90504	7.89969	7.50775	7.48229	7.71358	7.61095	7.77477	5.48125	5.61665	5.89412	5.9688	6.12793	5.82184	7.27339	7.46188	8.12458	7.69106	7.95565	7.90344	8.12537	7.5331	8.09332	7.51462	7.70945	7.7375	7.6547	8.17844	7.86883	8.30752	8.02397	8.4876	6.24747	6.1395	6.03668	6.30704	6.44926	6.51354	8.50848	8.48368	8.53253	7.38017	6.8701	7.50284	9.22238
1110020G09Rik	8.11949	8.13111	7.91435	8.2525	8.24413	7.55555	8.70888	8.80309	8.56586	8.57978	8.65404	8.97742	9.57337	9.47966	9.42311	9.30721	9.41802	9.5716	9.03841	9.03381	8.97006	8.94356	8.92959	8.96305	7.99162	7.32977	7.98682	8.33028	8.50859	8.36376	8.9449	9.07699	8.90701	8.80674	8.90159	9.06899	9.53412	9.69276	9.61208	9.62764	9.76992	9.64755	8.53712	8.82263	8.79544	9.22148	9.05626	9.22339	8.15514
1110021J02Rik	7.81195	7.91594	7.98098	7.9898	7.87173	7.3234	7.74612	8.0241	8.03801	8.28937	7.64992	7.29834	7.72001	8.48099	8.47414	8.4342	8.22738	8.33173	7.55437	7.53763	7.80695	7.94972	7.77306	7.83991	7.98317	7.91818	7.64246	7.8222	7.63445	7.86218	7.7199	8.27389	7.66016	7.87041	7.7611	7.96202	8.55213	8.29954	7.78876	7.95406	8.02958	7.81318	8.1055	8.38903	7.92034	7.64278	8.3868	8.37963	8.14144
1110021L09Rik	5.77661	5.86546	6.16512	6.25446	5.9952	6.18437	6.44939	6.24248	6.81948	6.62717	6.99283	6.46921	6.33217	6.72475	6.66628	6.73455	6.50983	6.66699	6.54975	6.40221	6.40784	7.29623	6.4975	7.43977	6.60483	6.37683	6.46473	6.64111	6.24134	6.13651	6.95731	6.58548	6.45005	6.87073	7.13089	6.93088	6.63499	7.37843	7.0186	6.52103	6.52349	6.97339	6.61094	6.9215	7.00693	6.99302	7.32269	7.02812	6.3628
1110028C15Rik	7.1906	6.85161	6.93877	7.20474	7.19511	6.98679	7.96596	7.83347	7.71128	7.6294	7.81082	7.7085	6.29591	6.41482	6.17167	6.27716	6.42766	6.40927	8.48527	8.40012	8.59204	8.13547	8.28881	7.89507	7.20592	6.84964	7.01241	7.00575	6.89598	6.63759	7.69476	7.87667	7.81999	7.7625	7.7305	7.83089	6.72422	6.7995	6.87378	6.58523	6.89891	6.54012	7.7334	7.78495	7.84843	7.99223	7.93684	7.97698	6.8651
1110031I02Rik	7.10913	6.96468	6.78237	7.23904	6.30877	7.37861	7.44465	7.53167	7.29368	7.44028	7.0383	7.60259	6.88467	6.6644	6.96059	6.69282	6.68722	5.97684	8.16603	8.18966	8.48689	8.43446	8.39404	8.25955	6.96248	7.16816	6.72209	7.33801	7.19775	6.98772	7.27692	7.49817	7.32404	7.45689	7.68551	7.21187	7.34928	7.16704	7.26119	6.66215	6.60224	6.50732	8.31148	8.95662	8.50973	7.79921	7.77396	8.13719	6.94873
1110032A03Rik	8.12569	8.34398	8.16592	8.80917	8.63386	8.16846	8.47441	9.44973	9.094	8.64097	8.69999	8.35954	6.49358	7.28723	6.24203	7.48208	7.40518	7.7875	8.84162	9.38877	9.02491	9.23924	8.69188	8.81552	8.59014	8.3531	8.08432	8.35465	7.69858	7.9285	8.03316	9.10329	8.79047	8.23791	8.60671	7.96493	7.94113	7.41737	7.22418	6.72022	7.33417	6.39436	9.02747	9.28668	8.99723	9.23288	8.60296	8.9101	8.40471
1110032A13Rik	5.78472	5.80355	6.00561	6.08224	6.19058	6.39227	5.89444	6.04185	5.97301	5.83342	6.17096	5.82857	5.70358	5.88651	5.85124	6.06276	5.98891	6.02515	6.00448	6.13237	5.91054	5.51132	5.98309	5.9764	5.75656	6.15755	6.47531	5.89099	5.89505	5.92406	5.76134	5.93314	6.2571	5.86993	6.07041	5.77195	5.772	5.81638	5.74999	5.70656	6.12533	6.05612	5.92461	6.14775	5.95277	5.97296	5.84876	5.95483	6.35176
1110032F04Rik	7.1079	7.03814	6.94579	6.9911	6.86962	6.85939	6.92357	6.79828	6.88227	6.99521	7.06859	6.9396	7.04342	7.13143	7.05788	6.95868	6.91749	6.82241	6.95191	7.13458	6.98509	7.24385	6.99064	6.94808	6.846	7.13688	6.9974	7.19691	6.93857	6.99985	6.87538	6.88774	6.95087	7.0573	6.92281	6.95693	6.98828	7.01676	7.0451	7.00231	6.90087	6.86763	6.82827	6.76702	7.0112	6.87838	6.94494	7.02931	7.09702
1110034A24Rik	7.45668	7.39048	7.69358	7.42306	7.70965	7.00539	7.58808	7.69829	7.64796	7.71409	7.70978	7.69036	7.80483	8.02702	7.90926	7.79034	7.76516	7.94255	7.74082	7.71609	7.71195	7.66315	7.84488	7.25444	7.23561	7.40731	7.55176	7.50448	7.46623	7.56576	7.70782	7.56664	7.61377	8.03088	7.62889	7.84678	8.38678	8.47207	7.89604	8.1248	8.25213	8.44792	7.65891	7.81416	7.54235	7.60783	7.68789	7.57178	7.21124
1110034B05Rik	6.67402	6.43592	6.71989	7.27132	6.6527	6.42032	6.85672	6.64843	6.79544	6.2559	7.02683	6.81549	6.98851	7.25862	6.87119	8.0249	7.79631	7.39505	6.45943	6.57038	6.38638	7.06771	6.33753	6.15437	6.90887	6.52151	6.39918	7.08779	6.61194	6.78693	6.70902	6.61001	6.51454	6.31115	6.45535	6.39785	7.25321	7.11903	7.0701	7.59133	7.40744	6.70821	6.4577	6.76072	6.61044	6.99133	6.15746	6.78336	7.9104
1110036O03Rik	6.29984	6.13467	6.45622	6.21979	6.88006	6.43369	6.58488	6.93728	6.80587	6.90476	7.15395	6.61584	5.74738	5.66361	5.82522	5.64218	5.92628	5.87164	6.58755	6.70924	6.66681	6.45294	7.11572	6.68241	6.3388	5.9215	6.39701	6.34191	6.5223	6.31774	6.87932	6.58468	6.57938	6.46934	6.84503	6.80588	5.72132	5.46469	5.80843	5.74992	5.67683	5.79528	8.26477	8.29157	7.66817	6.42721	7.17814	6.60665	6.12301
1110037F02Rik	9.62224	9.40787	9.31184	9.76919	8.64824	9.08173	9.53164	9.60137	9.73106	9.42435	9.74072	9.45752	8.60811	8.97335	8.92135	8.84211	8.9935	9.07959	9.36701	9.5192	9.38439	9.71599	9.49582	9.50772	9.62007	9.05259	9.41127	9.83021	9.26457	9.43076	9.50146	9.35708	9.54757	9.79019	9.73706	9.57447	8.9306	9.31867	9.1549	9.45056	9.35873	9.40546	9.60481	10.1876	9.88892	9.03203	9.81685	9.59885	9.65763
1110037F02Rik	6.42713	6.65662	6.34389	6.66109	7.27973	6.07614	6.06582	6.70147	6.33802	6.4485	5.85977	6.4419	5.85905	5.82691	5.81546	6.19467	6.02052	6.10108	6.33747	7.01414	6.36599	6.67917	5.84691	6.80819	6.47017	6.03522	6.12845	6.41672	6.59413	6.56151	6.63207	6.1703	5.81369	7.03436	7.00103	6.5834	6.38349	6.00363	6.13303	6.58458	6.45765	5.96116	6.71427	7.09527	6.84955	6.21754	6.58219	6.28099	6.42308
1110037F02Rik	8.7729	8.60578	8.69816	8.83359	8.42997	8.40709	8.85231	8.59266	8.88441	8.64778	8.83625	8.76084	8.15205	8.43904	8.3238	8.50757	8.51313	8.55935	8.75821	8.98615	8.86268	8.52808	8.76586	8.94608	8.80191	8.8483	8.81431	8.78685	9.02237	8.94659	8.99405	8.8463	8.6743	8.85357	8.90419	9.1811	8.20388	8.34805	8.34565	8.71916	8.82238	8.87984	8.94145	9.04022	8.96501	8.87509	8.79937	8.80877	8.30258
1110038F14Rik	6.19141	6.30383	6.44934	6.03936	5.99189	6.19858	6.05365	6.3677	6.17642	6.26649	6.12986	5.99681	5.97176	6.34698	6.28656	6.48851	6.64365	6.55726	6.42381	6.13327	6.21037	5.94485	6.09838	5.88196	6.36083	6.33343	6.01145	5.8586	6.34744	6.1643	6.54709	6.30494	6.6688	6.55008	6.53871	6.18369	6.23659	6.24549	6.23799	6.37423	6.52736	6.07506	6.062	6.29339	6.10238	6.52102	6.33399	6.36479	6.51683
1110049F12Rik	5.59625	5.29949	5.52763	5.74026	5.38596	5.37296	5.43742	5.36194	5.36296	5.5557	5.33496	5.55068	5.54182	5.57343	6.04614	5.8244	6.43679	5.52361	5.466	5.24209	5.34499	5.09005	5.91809	5.33511	6.50322	5.50927	5.23801	5.37992	5.54963	5.47602	5.34334	5.51886	5.40079	5.14987	5.38429	5.49027	5.98259	6.61309	6.6796	5.71418	5.57246	5.36127	5.82999	5.50739	5.36489	5.12257	5.55517	5.36633	5.31946
1110051M20Rik	5.97013	5.96992	6.03472	5.91447	5.56425	6.00392	6.07505	5.6793	6.26526	5.88373	5.7912	5.93821	5.66156	5.51865	5.90719	5.84366	5.71911	5.64853	5.78854	5.8092	5.8886	6.57607	5.97366	5.9741	5.889	5.38052	5.59537	5.76978	5.65987	5.64511	5.87612	5.91156	5.43577	6.02678	5.99514	6.12398	5.65879	5.53322	5.45117	5.61436	5.67415	5.75064	6.60911	6.57696	6.71816	6.29008	5.74876	6.08848	5.37355
1110054O05Rik	7.6401	7.63214	7.76095	7.55237	6.83684	7.61496	7.5452	7.30648	7.77681	7.57094	7.49014	7.71307	7.92393	7.8639	8.00525	8.06205	8.05402	7.91008	7.22316	7.22527	7.02103	7.13048	7.60973	7.48831	7.38115	7.5864	7.76306	7.62495	7.50218	7.62226	7.33927	7.46304	7.08624	7.39542	7.55516	7.48435	7.8443	7.62142	7.73839	7.70207	7.79666	7.94486	7.51488	7.25989	6.87116	7.25215	7.53144	7.35609	7.54561
1110057K04Rik	7.32782	7.16865	6.88113	7.95286	8.15482	7.80902	8.21732	7.24884	7.45725	7.52065	6.78713	7.68574	7.40694	7.75284	6.94763	6.85304	7.7955	7.76138	7.7205	7.70791	6.93266	6.59003	7.33218	7.34875	7.64864	7.29513	6.01239	7.59507	7.50022	6.56895	7.49681	7.85393	6.17787	7.40148	7.27017	7.91423	6.71714	7.50008	6.99881	7.83564	7.31453	7.53774	7.68186	7.76182	8.11093	7.9768	6.21311	7.58703	6.81352
1110058L19Rik	7.817	7.828	7.71158	8.76627	8.03568	7.25551	7.40759	8.29939	7.72783	8.2602	7.66107	7.32337	8.50575	9.25848	8.72918	8.74604	8.90585	8.80947	8.21985	7.96649	8.0471	8.29129	8.14297	7.80395	8.0295	7.78294	7.49785	8.79196	7.52208	7.63857	7.47009	8.11018	7.01784	7.12947	7.97868	7.87208	8.86661	8.7857	8.2089	9.1666	9.03556	8.39319	8.7812	9.10653	9.15822	8.02209	8.48495	8.12973	8.21504
1110059E24Rik	9.66903	10.1103	9.99845	10.0221	10.4349	10.3848	9.96131	9.14262	9.8955	9.75524	9.9109	9.60683	9.64918	9.72644	9.84774	10.0057	9.95084	9.84411	9.53	9.2091	9.33467	9.61288	9.48505	9.26288	9.87819	10.1865	10.3595	9.69501	9.87	9.81276	9.52399	9.48615	9.3834	9.66702	9.6726	9.61229	9.61437	9.59306	9.68014	9.90791	9.79934	9.61729	8.97001	9.16269	9.28486	9.53736	9.64133	9.5322	9.59593
1110059G10Rik	8.16694	7.87323	7.93635	8.21589	8.4301	7.57905	7.46546	7.08536	7.90177	7.74924	7.38653	7.43189	7.27682	7.3376	6.92992	7.9089	7.25735	7.38317	8.08742	8.26051	7.76919	7.43304	7.45093	7.68642	7.87672	8.20576	8.061	7.9425	7.88827	8.06537	8.04302	7.72125	7.20131	7.05428	7.75393	7.41458	7.49461	7.27448	7.36218	7.42079	7.81477	7.27853	7.56765	7.58073	6.92819	7.34367	7.54287	7.89561	8.08019
1110065P20Rik	6.93544	6.97521	6.8451	6.97694	6.68436	6.64651	6.98783	6.9243	6.97373	6.88325	6.96049	6.69075	6.96186	6.68839	6.95308	6.75212	6.96282	6.69667	7.23092	7.31687	7.24384	6.95261	7.13167	7.11157	6.88443	6.73313	6.9119	7.05805	6.92188	7.11824	7.01487	6.95597	6.99712	6.90943	6.79727	6.74512	6.68303	6.83541	7.05361	7.00549	6.92738	6.86768	6.60453	6.99873	6.90975	7.31623	7.15709	7.35367	6.90032
1110067D22Rik	8.56087	8.29905	8.13247	8.56794	8.59005	8.00819	8.78754	8.63007	8.83512	8.71057	9.03397	9.04207	8.33515	8.28962	8.18348	8.05795	8.34872	8.30618	7.64508	8.01355	8.32386	8.03073	8.5761	8.41854	8.54179	8.38563	8.34649	8.28283	8.54703	8.60936	8.83126	8.6164	8.92702	8.93308	9.05535	9.07476	8.50361	8.63349	8.75706	8.41099	8.37028	8.61217	8.68034	8.81203	8.6648	8.35774	8.88333	8.6158	8.96138
1190002H23Rik	8.12407	7.75181	7.99557	7.92355	7.72597	7.13647	7.46736	7.69129	7.35085	7.75913	7.02934	7.61824	7.06139	7.40769	6.8372	7.12202	7.58973	6.99284	7.96253	7.85869	7.59081	7.8077	8.06329	8.0628	8.40367	8.55275	8.45553	8.10689	8.60599	8.39166	7.71726	7.62683	7.7791	7.58529	7.54138	7.41497	7.21093	6.86336	6.45547	6.47246	6.94289	6.67447	8.01647	7.98695	7.89631	7.7945	7.92553	8.14021	8.66985
1190002N15Rik	5.61342	5.56328	5.61463	5.52465	5.66146	5.68212	6.43147	6.20305	5.97501	6.09597	6.08971	6.40384	5.44164	5.55461	5.57565	5.54083	5.42729	5.46808	6.05516	5.88498	6.0035	5.79043	5.91946	5.86584	5.62707	5.7165	5.58304	5.56983	5.55908	5.40817	6.08301	6.43565	6.31452	6.06564	6.19937	6.02784	5.54633	5.73038	5.64223	5.54422	5.51522	5.66624	5.8215	5.94013	5.80392	6.30365	6.37872	6.27313	5.78359
1190005F20Rik	8.43947	8.52694	8.62763	8.78203	8.60966	8.487	8.53977	8.56523	8.56229	8.52305	8.48781	8.3505	8.92424	8.72978	8.84173	8.74192	8.7193	8.94197	8.92042	8.98696	9.54529	8.54951	8.86682	8.63476	8.45445	8.79744	8.28476	8.28811	8.18024	8.4743	8.41858	8.76651	8.77771	8.26484	8.73197	8.58387	8.4429	8.55025	8.87202	8.71988	8.58066	8.7333	8.89222	8.99474	9.1906	8.95215	9.22185	8.98504	8.59011
1190007F08Rik	5.69483	5.60491	5.70747	5.66516	6.04292	5.78666	6.02442	6.27565	5.98711	6.18658	6.20908	5.93819	5.96158	5.77017	5.83598	5.8424	5.8097	5.92461	6.24004	6.36725	6.21316	6.03932	5.91768	6.22976	5.8244	5.68386	5.85786	5.72416	5.61271	5.82729	6.20328	6.00231	5.98744	6.03881	5.85155	6.0771	5.92564	5.85961	6.00413	5.7241	5.76198	5.91294	6.27282	6.26889	6.39398	6.2049	6.71155	6.23115	5.74183
1200009O22Rik	5.75436	5.8541	6.03026	5.78798	5.83725	5.83931	6.36142	6.50419	7.01115	6.88513	6.67987	6.9794	5.682	5.44328	5.52411	5.55364	5.44685	5.61789	5.45589	5.48128	5.46718	5.69272	5.75274	5.69077	6.05586	6.15215	6.38187	6.1738	5.91513	6.01322	6.41206	6.54387	7.18362	6.90114	6.95435	7.04122	5.42866	5.52316	5.3679	5.46038	5.59638	5.63534	5.52423	5.69072	5.26124	5.49964	5.64261	5.40895	6.09054
1200009O22Rik	6.18357	6.52347	6.49178	6.16224	6.39173	6.40164	6.64686	6.94129	6.85392	6.91226	6.86791	7.05549	5.71669	5.62702	5.8822	5.87727	5.82693	5.69609	6.07677	5.93756	6.08738	5.96586	6.03825	6.03633	6.56491	6.40934	6.38024	6.50931	6.84458	6.44393	6.88629	6.84104	8.02827	6.58059	6.85991	7.41248	5.78845	5.73224	6.00554	5.74944	5.8811	5.45585	5.86069	5.83918	5.86726	5.73409	5.81514	5.64586	6.72776
1200011I18Rik	8.07215	7.81704	8.2271	8.06318	7.55313	8.0414	8.03408	8.04504	7.94866	7.74855	7.89517	8.0091	7.08739	7.46198	7.60903	7.27761	7.7309	7.8033	7.35186	8.23723	7.50914	8.45263	7.672	7.5977	7.80225	7.81271	7.64582	7.72764	8.23668	8.13945	7.83146	8.16458	6.92433	7.54789	7.76892	7.6648	7.39148	7.32153	6.71916	7.88201	7.37485	7.87224	8.19841	8.20015	7.78868	7.59292	7.54718	7.77888	7.98159
1200011M11Rik	7.13422	7.1515	6.93323	7.31608	7.28827	6.91329	7.30726	7.3472	7.36938	7.2377	6.68394	7.29838	7.90978	7.79656	7.89629	8.26064	8.34319	8.02358	6.77137	6.99788	7.222	7.83774	7.24799	7.27067	7.02853	7.30901	7.37983	6.76618	6.98797	7.01219	6.69616	7.25568	6.96831	7.23705	6.94202	7.08189	7.78706	7.97783	7.65428	8.65376	8.43441	8.52466	7.4446	7.62481	7.2802	6.60224	7.18513	7.3592	6.63254
1200014J11Rik	9.54647	9.50487	9.48343	9.55878	8.59858	8.72843	9.63346	9.26288	9.79263	9.66751	9.9046	9.88632	10.1492	10.4043	10.2943	10.2294	10.432	10.5372	9.82564	9.41175	9.58687	9.69304	9.76572	9.74611	9.54429	9.0612	9.55185	9.44503	9.58609	9.82156	9.84151	9.44693	9.78501	9.55727	9.75251	9.79038	10.4743	10.4711	10.7736	10.5049	10.5113	10.7936	9.3139	9.46927	9.49595	9.25835	9.43196	9.46084	9.18422
1200016B10Rik	7.91483	8.29812	7.98639	8.31042	8.05345	7.63686	8.4654	7.98407	8.30802	8.00146	8.27568	8.10775	8.4929	9.02677	8.80609	8.62365	8.62433	8.52257	8.34891	8.77914	8.59935	7.77653	8.52356	8.57264	8.33879	8.32148	7.9577	8.39033	7.8216	8.15673	8.14433	8.08139	8.60488	8.16838	8.22639	8.1861	9.37172	9.28114	9.42467	9.45875	9.36027	9.68907	8.26257	8.25466	8.45955	8.33998	8.00644	8.56144	8.13494
1300001I01Rik	7.32754	7.34363	7.22004	7.30606	7.59198	6.52372	7.3012	7.08011	7.14917	7.39295	7.62805	7.68186	8.17853	8.33948	8.17607	8.19849	8.43365	8.36875	7.82945	7.93204	7.86879	7.62013	7.76697	7.72607	7.31761	7.37439	7.109	7.72978	7.35454	7.41291	7.65045	7.38624	7.66433	7.39176	7.47975	7.38393	8.35578	8.02525	8.49253	8.4202	8.25056	8.50899	7.86632	8.20867	8.53348	7.8875	7.80696	7.39193	7.29681
1300003B13Rik	7.03875	7.38861	6.82818	7.1159	7.22787	7.24595	7.90877	7.30135	7.93119	7.6531	7.42355	8.13474	6.75643	7.63559	7.27119	7.77728	8.12367	7.677	7.57091	7.36958	7.84494	8.82504	8.32439	8.24342	7.10196	7.28762	7.25373	7.31715	7.23102	7.34184	7.29721	7.31614	7.23991	7.27515	8.03765	7.61019	7.67862	7.60214	7.52177	7.65336	7.52599	7.33135	8.07785	7.73636	8.32885	7.72353	7.06868	7.19737	7.2055
1300010F03Rik	6.99674	7.07485	6.95945	7.12393	7.00249	6.82171	7.5824	7.23379	7.44792	7.27076	7.44306	7.43803	7.76434	7.8176	7.83839	8.17111	7.73135	7.97343	8.17464	8.11021	7.82994	7.88011	7.64578	7.45947	7.27848	7.30718	7.41822	7.16735	7.04769	7.145	7.80774	7.75816	7.47474	7.4913	7.43189	7.59284	7.94908	7.95241	8.09442	7.88137	7.84624	7.97508	7.60494	7.64095	7.19559	8.86144	8.96691	9.04771	7.12332
1300014I06Rik	5.6134	6.21223	5.89655	5.72028	5.59166	6.74877	5.19784	5.14701	5.08202	5.08846	4.93493	5.04244	5.8739	5.18722	5.0516	5.30654	5.22977	5.29193	5.14296	4.96601	5.02027	4.99302	5.14047	4.99056	5.91106	5.97501	5.71637	5.79485	6.12816	5.81004	4.88444	4.99338	5.09816	5.145	5.30498	5.04189	5.2136	5.00663	5.10752	5.2073	5.07039	5.18092	5.08392	5.0989	4.9851	4.927	4.94378	4.80922	5.28216
1300018J18Rik	6.22014	6.29167	6.1266	6.34287	6.53806	5.99823	6.19221	6.14674	6.38949	6.37801	6.0885	6.07426	5.79473	6.09441	5.81618	5.97818	5.89234	6.11307	6.12688	6.44122	6.77912	6.18241	6.57071	6.39281	6.09071	6.54381	6.4229	6.37945	6.22361	6.39332	6.37419	6.59116	6.33658	6.36911	6.56958	6.33607	6.20541	6.21886	5.88232	6.11783	6.19839	6.06237	6.39682	5.8625	6.16491	6.71336	6.26725	6.39788	6.1555
1500001M20Rik	9.23756	9.483	9.46814	9.48174	9.59583	9.03187	9.13132	9.08567	9.39718	9.57161	9.03372	9.05259	9.42753	9.92182	9.83904	9.98984	9.89592	10.082	8.74468	8.90543	8.21727	9.11867	9.09893	8.1477	8.84389	9.09011	9.20341	9.03198	9.03794	9.26711	8.79693	8.99909	9.19197	9.27657	9.14537	9.13602	9.78219	9.64154	9.60832	9.86019	9.87238	9.79285	8.91285	9.03425	8.51398	8.91245	8.72217	8.87402	9.05415
1500003O03Rik	8.34488	8.6298	8.42882	8.42979	7.9903	8.58296	8.77011	8.28569	8.63576	8.59206	8.67046	8.43476	8.86289	8.64286	8.16957	8.58893	8.43045	8.40188	9.59212	8.63606	9.30826	8.32849	8.52585	8.72578	8.81835	8.51143	8.6019	8.52672	8.4476	8.44303	8.35672	8.59551	8.30203	8.85285	8.64999	8.42208	8.68989	8.6407	8.80146	8.58043	8.95526	9.16821	8.3466	8.46398	8.88115	8.83473	9.05383	8.92446	8.17189
1500009C09Rik	5.934	5.70594	6.14544	5.77971	5.80857	6.11458	5.68316	5.60329	5.78138	5.86643	5.85929	5.62841	5.76674	5.71536	5.73749	5.75528	5.63496	5.61381	5.87764	5.97202	5.78069	6.09152	5.77257	5.97847	6.10489	5.95632	6.13512	6.15604	5.72387	5.9272	5.932	5.66836	5.85163	5.8952	5.70817	5.65233	5.73667	5.78887	5.72339	5.78219	5.60466	5.81463	5.77461	5.58486	5.77166	5.88029	5.96406	5.73492	5.96566
1500010J02Rik	7.61414	7.33023	7.33477	7.57091	6.73983	7.07853	7.78608	7.86068	7.84623	7.74614	7.6903	8.20625	8.32108	8.11752	8.28374	7.81145	8.19926	8.09052	7.59816	7.83546	7.63465	7.51431	7.48989	7.58911	7.35154	7.20628	6.3501	7.31701	7.30485	7.16151	7.98276	7.5621	7.99664	7.86167	7.96473	8.00191	7.97735	8.39455	8.0668	8.00357	8.14339	8.11905	7.85324	8.08775	7.81413	7.53792	7.66826	7.68039	7.17499
1500011B03Rik	7.36843	7.26448	7.26121	7.46006	7.14717	7.62124	6.82885	6.87054	6.85834	7.05674	6.69211	6.83034	7.08571	7.32557	7.21387	7.20548	7.74988	7.31978	7.05823	7.14656	7.27943	6.62956	7.01224	6.98239	7.33421	7.16131	7.08041	7.29584	7.035	7.12826	7.16546	6.91335	6.52555	6.72118	6.35328	6.83787	7.28938	7.22238	7.05813	7.37654	7.20935	7.09296	6.97232	6.96013	6.66507	7.18666	7.18888	6.90653	7.57928
1500011H22Rik	7.79494	7.96498	8.07392	7.88992	9.05221	8.30477	8.40602	8.9496	8.49978	8.38291	8.84945	8.13318	8.48757	9.19489	9.31182	8.85045	9.22017	8.96169	8.84125	8.92731	9.10686	9.47612	8.49339	8.6532	8.13894	8.09483	8.3747	7.79778	8.00311	8.04443	8.53185	9.02723	8.63005	8.08002	8.39212	8.15223	9.11184	8.68148	8.66678	9.04903	8.95592	8.58573	8.82999	9.04803	8.67312	9.18283	8.96881	9.0043	8.40361
1500011K16Rik	8.09173	8.61989	8.43324	8.30361	8.46816	8.14355	7.65822	7.18228	8.24296	8.1171	8.08232	7.40168	7.40625	7.84552	7.87578	7.67051	8.06657	7.67409	8.00907	8.5364	7.94724	8.0164	8.53772	8.09754	8.55778	7.95964	8.433	8.38237	8.95442	8.89175	8.16629	8.37778	7.48985	7.77553	8.55591	7.821	7.52522	7.05939	6.86997	7.06123	6.72364	6.93008	9.22787	9.24096	9.17029	8.66489	8.4171	8.55283	8.83549
1500012F01Rik	11.1764	11.3889	11.3016	11.3388	11.4565	11.3524	10.9604	10.9839	10.8822	10.9814	10.8319	10.6439	10.9889	11.069	10.8718	11.0559	11.1096	10.9428	11.2428	11.1192	11.0891	10.8402	10.964	11.1575	11.474	11.2306	11.3031	11.0005	10.8791	10.7705	10.8184	11.1836	10.7439	10.5514	10.9131	10.6426	10.7872	10.5118	10.5927	11.0763	10.9284	10.8827	10.9487	10.5595	10.5222	11.185	11.1069	10.9824	11.4058
1500031L02Rik	6.16483	6.26355	6.14728	6.19114	6.01421	6.03899	6.25218	6.09792	6.14045	6.19585	6.11052	6.15199	6.08693	6.15577	6.25674	5.78404	6.22728	6.14548	6.05773	5.9683	6.23074	5.97186	6.11363	6.03492	6.28971	6.13032	6.18146	5.91111	6.06219	6.16692	6.22871	6.14621	5.99236	6.1195	6.19338	5.87368	6.05952	6.34605	6.08502	6.30942	6.01302	6.28697	6.0511	5.946	6.13207	6.3651	6.33713	6.35983	6.23532
1500032L24Rik	9.98421	10.329	10.0112	10.0933	11.0799	10.3368	10.0284	10.2264	10.403	10.4626	9.8668	9.78599	9.99652	10.457	10.215	10.344	10.5489	10.3916	9.5562	9.3497	9.65351	8.38869	9.55957	9.50314	10.3828	10.1512	10.1339	10.1004	10.031	10.0947	9.68709	10.014	9.53021	9.7706	10.2607	9.97075	10.388	10.3844	9.86415	10.2559	10.1152	10.1811	9.93537	9.97826	10.0892	9.11263	10.0581	9.39324	10.7162
1500035H01Rik	9.34263	9.41175	9.60828	9.44985	8.75465	9.38607	9.65816	9.64512	9.94592	9.55888	9.77537	10.1438	9.83194	9.74667	9.83277	9.85674	9.77731	9.85139	9.95284	10.1037	9.81653	9.36908	9.7162	9.83005	9.49965	9.30151	9.69024	9.32837	9.53716	9.32203	9.66827	9.64252	9.84964	9.40304	9.91413	9.46846	9.64869	9.72275	9.61615	9.73476	9.95016	9.94252	9.28139	9.60301	9.29102	9.53518	9.61148	9.73638	8.99279
1520402A15Rik	5.85866	5.78137	5.74208	5.76107	6.0197	6.0333	5.93741	5.96831	5.78174	5.82025	5.82436	5.80796	6.32741	5.97201	6.11573	6.09217	6.06068	6.12508	5.911	6.03699	5.93938	6.16298	5.86195	5.94633	5.74122	5.91611	5.8227	6.16941	5.8719	5.96118	5.81626	5.88781	6.06919	6.01115	5.87108	5.78242	6.17402	6.07936	6.09697	6.12577	6.14969	6.13623	5.76541	5.86467	5.86385	5.97732	5.90678	5.90802	5.89397
1600002K03Rik	5.42662	5.78313	5.53912	5.36247	5.36732	5.33516	5.52453	6.09287	5.69391	5.70638	5.71198	5.32185	5.73382	5.7785	5.9243	5.75088	5.96871	5.84538	5.97244	5.71792	5.89361	5.8955	5.82945	5.74494	5.10141	5.52805	5.52825	5.31529	5.33238	5.43854	5.33611	5.612	5.60228	5.63388	5.56979	5.31566	6.00037	5.88214	5.96552	5.77744	5.88729	5.95982	5.62418	5.37433	5.45736	5.66365	5.72604	5.67884	5.54944
1600012H06Rik	7.42882	7.19565	7.15296	7.49682	7.43849	7.59211	7.77356	7.61809	7.6831	7.39613	7.60192	7.43129	7.57822	7.35139	7.31378	7.45537	7.52031	7.40461	8.14934	7.37942	7.67	7.02954	7.45682	7.38907	7.30638	7.25386	7.56043	7.42579	7.57656	7.53773	7.64084	7.80796	7.60443	7.51037	7.55712	7.6753	7.41858	7.52621	7.63	7.52795	7.55061	7.41568	7.27991	7.60612	7.47433	7.89073	8.20844	8.40696	7.60263
1600014K23Rik	6.55364	6.50574	6.52861	6.49819	6.79848	6.48959	6.55761	6.63299	6.56196	6.53396	6.54904	6.44047	6.85235	6.759	6.79939	6.92219	6.59885	6.7413	6.67288	6.73293	6.5122	6.73571	6.58129	6.59995	6.39014	6.78496	6.56672	6.6247	6.55602	6.64556	6.46396	6.45521	6.66116	6.65619	6.51528	6.46698	6.91473	6.5336	6.7771	6.83124	6.7396	6.82045	6.49707	6.49385	6.6339	6.56989	6.65685	6.64864	6.68828
1600021P15Rik	6.23717	6.22496	6.13492	6.14007	6.0987	6.13766	6.5728	6.29589	6.37157	6.50042	7.17437	6.7148	6.55342	6.39246	6.42926	6.56352	6.62483	6.71584	6.16408	6.11851	5.98773	6.49136	6.50992	6.36955	6.20669	6.02659	6.18989	6.31955	6.33163	6.3513	6.29381	6.50574	6.37182	6.73382	6.30673	6.74785	6.30789	6.35036	6.56462	7.0557	6.69888	6.83108	6.37814	6.68049	6.65001	5.88596	6.18607	6.10404	6.11006
1600027N09Rik	6.07543	6.49946	6.49329	6.39199	6.23909	6.49053	6.14873	6.52432	6.58859	6.52175	6.59823	6.79041	6.83148	6.69906	6.73195	6.97569	6.59689	6.83819	6.44512	6.30416	6.62578	6.53415	6.76127	6.50203	6.69064	6.57759	7.00992	6.3598	6.46876	6.37737	6.17201	6.32757	6.31483	6.55126	6.63166	6.53092	6.52162	6.73414	6.79626	6.73562	6.81087	6.66844	6.39969	6.63146	6.54904	6.63385	6.7049	6.57432	6.71389
1600029D21Rik	5.46522	5.61253	5.58641	5.56226	5.72206	5.60288	5.44557	5.49602	6.30378	5.55083	5.49115	5.34889	6.31704	6.80477	6.0429	6.14949	6.64013	6.56789	5.47681	5.6825	5.44048	5.70544	5.84676	5.49157	5.47298	5.52568	5.63679	5.79758	5.40625	5.4639	5.29459	5.33755	5.36708	5.3249	5.28012	5.43006	6.11021	6.05522	5.64172	5.87765	5.64022	5.83985	5.31005	5.32924	5.22496	5.53289	5.57153	5.51926	5.53708
1600029O15Rik	5.83297	5.782	5.68801	5.81587	5.71176	5.72522	5.71606	5.75371	5.73254	5.72701	5.67391	5.7443	5.74563	5.7883	5.60757	5.79778	5.8427	5.71384	5.80324	5.7359	5.72995	5.81148	5.90819	5.75388	5.63505	5.72887	5.78156	5.95868	5.72233	5.7861	5.57837	5.61332	5.76101	5.87224	5.66585	5.7683	5.74544	5.97385	5.75136	5.72781	5.67746	5.74875	6.29746	6.60957	5.9074	5.71709	5.73569	5.70255	5.75002
1700001L05Rik	5.23416	5.24961	5.16467	5.17844	5.25513	5.31119	5.4246	5.57362	5.40327	5.36503	5.39936	5.23915	7.22212	7.56381	8.10855	7.65634	7.71297	7.72175	5.73181	5.30807	5.31538	5.28773	5.97071	5.27929	5.22711	5.27349	5.15432	5.1929	5.44808	5.2213	5.64862	5.69083	5.08129	5.77329	5.72347	5.263	8.24047	8.09958	6.93178	7.49194	8.32372	7.88467	5.5672	5.72341	5.63764	5.86315	5.65	5.22088	5.47902
1700001L19Rik	5.0319	5.33473	5.23555	5.18178	5.216	5.32536	5.83592	5.6691	5.62893	6.25703	5.67947	5.41877	5.54274	6.02754	6.22789	5.10715	5.93875	5.96219	5.75874	6.71895	5.7233	5.27775	5.58337	5.66923	5.26849	5.17295	5.22385	5.40253	5.14056	5.3086	5.52153	5.57276	5.25695	5.26003	5.63332	5.73242	6.33048	6.29076	6.76981	5.65839	5.73087	5.63127	5.61777	5.66865	5.6434	5.5699	6.09862	5.92177	5.22393
1700007K13Rik	5.53565	5.51036	5.51928	5.58976	5.62035	5.78202	5.89654	5.68	5.42375	5.76776	5.65022	5.68789	6.6874	6.59875	6.58985	6.5389	6.93936	6.90181	7.79262	7.67411	6.91708	5.94917	6.49565	6.78625	5.56033	5.52957	5.81254	5.85488	5.56129	5.68024	5.44099	5.71288	5.56582	5.74163	5.69614	5.30164	8.29193	6.79952	6.76176	6.4636	6.60495	6.16352	6.06314	6.10815	6.07174	5.95455	7.28767	5.84713	5.57726
1700010I14Rik	5.80826	5.65387	5.96911	5.74336	5.34646	5.7989	5.9738	5.42992	6.27391	5.83994	4.98727	5.52143	5.01336	5.17473	5.34616	5.40948	5.20941	5.23604	5.44247	6.12661	5.91449	5.38284	5.76239	5.66614	5.56827	5.53847	5.66714	5.73722	5.67839	5.70341	5.92446	6.43049	5.88191	5.27702	5.50899	5.7977	5.10605	4.8404	4.99347	5.16215	4.9295	5.16946	5.83882	5.65638	5.51514	6.18612	5.29488	6.66266	5.46787
1700011F14Rik	4.6241	4.69898	4.62534	4.66142	4.86687	4.74446	4.71832	4.68424	4.62073	4.68915	4.66091	4.66	5.81314	6.91076	6.81829	5.97391	6.64348	5.66165	4.63657	4.73602	4.65208	4.82118	4.6866	4.80108	4.8214	4.94017	4.73242	4.86553	4.74844	4.66938	4.76047	4.71607	4.72035	4.80191	4.66578	4.79942	8.9256	8.69893	8.2032	7.91708	8.33006	8.0378	4.73325	4.788	4.68876	4.7358	4.70392	4.78848	4.83513
1700011J10Rik	7.55511	7.54436	7.37374	7.54865	8.33645	8.19783	7.82593	8.29531	7.92436	8.0998	7.93426	7.18788	7.92385	8.20828	8.19815	8.23645	8.45005	8.09489	7.98734	8.06741	8.19743	8.14435	8.10142	7.94451	8.11372	7.96007	8.23936	7.65462	7.42324	7.2595	7.92165	8.02766	7.95406	6.99409	7.79623	7.97352	8.58236	8.39814	8.38299	7.97879	7.89258	7.00798	8.20817	8.12618	8.0248	7.90092	7.72529	8.06616	7.3748
1700012A16Rik	5.46079	5.45255	5.58476	5.47727	5.40951	5.45968	5.33383	5.3142	5.24392	5.33374	5.32136	5.25774	5.37342	5.36947	5.38499	5.4257	5.37716	5.56929	5.3065	5.38698	5.29554	5.3581	5.29911	5.39326	5.56768	5.43658	5.38631	5.47849	5.3433	5.38272	5.42325	5.27985	5.40915	5.42156	5.17039	5.28865	5.67939	6.15944	5.62224	5.44595	5.86648	5.85463	5.65992	5.45949	5.46695	5.40097	5.36144	5.24432	5.46986
1700012B15Rik	6.97356	7.29695	7.12411	7.0162	6.47451	7.33071	6.82788	6.83699	7.03451	6.72162	6.8446	6.93936	7.07355	7.21536	7.33138	6.83949	6.89724	6.99732	7.19702	7.12924	6.78745	7.1118	6.96116	6.89287	7.18286	7.35092	6.95791	6.9786	6.90829	6.97333	7.14199	6.96567	6.96293	6.85345	7.23465	6.72431	7.0987	7.41009	7.45335	6.87	7.18104	7.11242	6.74559	6.75093	6.68935	7.0883	7.04901	6.86663	7.24075
1700013H16Rik	4.9171	4.83259	4.8921	4.92403	5.0851	4.85261	4.74225	4.85619	4.79512	4.7165	4.80272	4.85116	8.21594	7.36514	7.1967	6.87406	7.2107	7.4726	4.85422	4.80477	4.85136	4.88245	4.81003	4.86834	5.11773	5.03956	4.83956	4.80066	4.91569	4.79695	4.82507	4.77851	4.78296	4.87454	4.76682	4.83957	7.97162	9.2624	8.0775	5.63316	5.89968	5.27371	4.8992	4.95848	4.96456	4.74717	5.00789	4.95497	5.61988
1700013N18Rik	5.48676	5.07385	5.76994	5.3261	5.36639	5.59264	5.42121	5.80901	5.12452	5.28599	5.4793	5.46267	5.68234	5.51989	5.53738	5.42239	5.54072	5.64518	5.60186	5.15811	5.63612	5.2894	5.38848	6.08601	5.59569	5.47715	5.27111	5.64568	5.52971	5.44833	5.16724	5.1949	5.49469	5.49614	5.488	5.57804	5.48592	5.77352	6.02656	5.66903	5.58744	5.62524	5.46976	5.38048	5.36806	5.15848	5.36439	5.56897	5.14542
1700016K19Rik	6.01763	5.83734	5.6748	5.67466	6.29256	5.97708	5.9001	5.99608	5.92967	6.03546	5.85774	5.66757	5.58073	5.65782	5.73582	6.10447	5.91022	5.73741	6.50898	6.13985	6.49761	5.95795	6.12537	6.6134	5.93407	5.8552	5.93862	6.01603	5.72269	5.89075	5.70249	5.85792	5.77966	5.87457	5.71169	5.67362	6.20231	5.95118	6.06915	5.93795	5.97951	6.00485	5.75373	5.74238	5.80943	7.05302	6.80621	7.23612	5.82187
1700017B05Rik	6.24372	6.24753	6.34437	6.21656	5.86813	6.25193	6.46498	6.3861	6.51517	6.71454	6.76685	6.4207	6.29026	6.3459	6.29944	6.33283	6.28894	6.1254	7.12998	6.98289	7.33144	7.08353	7.29233	7.26127	6.23528	6.25889	6.13669	6.25715	6.09647	6.17827	6.49537	6.61307	6.27468	6.4464	6.42183	6.46411	6.29042	6.34254	6.3026	6.02103	6.03984	6.00545	7.31986	7.69872	7.71758	7.00521	6.83122	6.78019	5.71357
1700018B24Rik	4.82038	4.85471	4.90103	4.79284	5.05714	4.95368	4.86414	4.8801	4.71721	4.75298	4.81835	4.88745	5.83084	6.41878	5.58652	6.21629	7.0541	6.30349	4.88835	4.8058	4.88592	4.86316	4.85354	4.87704	4.88686	4.98139	4.85467	4.78346	4.81277	4.89378	4.86414	4.80102	4.8722	4.92361	4.81439	4.82918	6.13164	6.26745	5.66113	5.71956	5.94267	5.52772	4.72622	4.7908	4.81959	4.82591	4.81985	4.83769	4.91054
1700019A02Rik	4.69857	4.69622	4.76818	4.65723	4.83202	5.02571	4.72415	4.94251	4.75247	5.03372	4.83511	4.84167	8.60734	9.27049	8.88198	8.84093	8.3629	8.31986	4.76453	4.7551	4.78837	4.81302	4.78796	4.68348	4.97984	4.77784	4.85754	4.6918	4.78433	4.66126	4.6989	4.65941	4.77844	4.6448	4.6866	4.76241	8.92198	8.72861	7.37811	8.82691	8.12009	8.13246	4.7966	4.89683	4.85076	4.86322	4.84839	4.80299	4.75667
1700019D03Rik	4.92698	4.8951	4.99198	5.06946	5.02908	4.88413	4.81494	5.03636	5.0282	4.99289	4.98923	4.90495	8.64964	9.07851	9.03087	9.1361	9.18316	9.22087	4.96943	4.76721	4.864	4.8358	4.90046	5.52387	5.03207	5.11243	4.93527	5.11774	4.885	5.00924	4.93268	4.84572	4.90619	4.9233	4.95102	5.22488	8.33748	8.47961	8.17626	7.71277	7.67277	7.85568	5.04379	4.93339	4.96278	4.89972	4.91826	4.93927	5.11964
1700019E19Rik	7.8885	8.2229	8.12544	8.15771	8.16986	8.13744	8.52943	9.0462	9.06565	9.01172	8.70064	8.72462	8.01499	8.21148	8.50629	8.12682	8.15734	8.05146	8.98009	8.77283	8.36452	9.26769	8.73359	9.04059	8.03482	7.83033	7.76258	7.92576	8.14841	8.18955	8.7741	9.09771	8.75248	8.70432	8.87705	8.82292	8.06529	8.29249	7.6406	8.04111	8.31077	7.77738	9.3748	9.39625	9.16669	8.69882	9.38958	8.87438	7.88986
1700019O17Rik	5.9691	5.76349	6.02369	5.911	6.32455	6.13583	5.75231	5.79135	5.72013	5.86187	5.85894	5.81136	5.97891	5.85011	5.87802	5.93286	5.86245	5.90154	5.91637	5.8971	6.00455	6.20685	6.08415	6.05994	5.92699	5.9383	6.20266	6.19488	5.98792	6.02833	5.88885	5.7428	5.78977	5.80208	5.74063	5.86139	5.8534	5.707	5.92555	5.81995	5.81817	5.90045	5.94784	5.75105	5.81799	5.93724	5.96084	5.84933	5.9565
1700020C11Rik	5.8671	5.78958	5.86709	5.8986	5.86241	5.77114	5.85766	5.87628	5.89073	5.81512	5.86622	5.73368	5.93158	6.06765	6.12968	6.31879	5.85058	5.94129	5.87616	5.74092	5.76883	5.90566	5.93263	5.97576	5.83576	5.80412	5.89192	6.21878	5.71395	5.84267	5.67401	5.75429	5.84517	5.98541	6.09356	5.95372	6.0394	5.90695	6.02052	6.17088	6.2149	6.05435	6.21109	6.23971	6.28417	5.75424	5.71898	5.90681	6.09002
1700020L24Rik	5.90883	5.63728	5.83784	5.54023	5.60777	5.70136	5.46091	5.50593	5.65769	5.54701	5.72564	5.35508	5.40296	5.39915	5.36057	5.44521	5.42731	5.60612	5.73193	5.82062	6.06114	5.4827	5.5145	5.43728	5.65942	6.10492	6.07353	5.90513	5.7164	5.86629	5.45117	5.55186	5.42951	5.617	5.56964	5.66655	5.5183	5.56093	5.4674	5.45017	5.41399	5.448	5.22261	5.36119	5.42247	5.73423	5.90856	5.66801	6.46704
1700020O03Rik	7.50969	6.97566	7.26811	7.41126	5.958	7.09803	7.91541	7.39264	7.83912	7.63232	7.75659	7.8572	7.64456	7.99962	7.79694	8.0496	7.67236	7.97606	7.90705	7.53598	7.68447	7.63584	8.18604	8.40199	7.60123	6.62427	7.01653	7.83741	7.24027	7.71027	7.8301	7.61425	7.82797	7.7862	7.92135	7.47758	8.15092	8.55808	8.38026	8.06317	7.9881	8.06773	7.66307	7.91848	7.66277	7.89769	8.69034	8.09496	6.65283
1700021C14Rik	6.05647	5.84143	5.82652	5.91689	6.10872	5.62102	5.84408	5.87537	6.22299	6.66927	6.70163	5.98491	6.6155	7.52473	7.05315	7.40267	7.854	7.58445	6.58797	6.15213	6.40393	5.81979	5.61679	6.392	6.16606	6.05397	6.08824	5.97359	5.72864	5.81874	5.97658	5.96834	5.98846	6.00697	6.33284	5.83898	6.86168	6.93402	6.89423	7.51303	8.03773	7.76358	6.43981	6.17807	6.30327	6.66719	5.77752	6.5465	6.03989
1700021F05Rik	10.1755	10.357	10.327	10.2066	10.6011	10.5467	10.6271	10.8026	10.7473	10.7917	10.5823	10.6302	11.3673	11.4098	11.3834	11.2445	11.2071	11.4488	10.7635	10.7822	10.8277	10.7365	10.8563	10.9803	10.4748	10.4409	10.3934	10.5048	10.5128	10.5842	10.8026	10.7953	10.8583	10.8746	10.8373	10.781	11.3934	11.5533	11.3673	11.3877	11.5384	11.3364	11.1538	11.1126	10.9769	10.9621	11.0981	11.0635	10.6392
1700021K19Rik	5.89305	5.7338	5.76354	5.85627	5.80778	5.66784	5.73547	5.64646	5.95217	5.80441	5.94627	5.92875	5.91343	5.82825	5.76335	5.83207	5.68125	5.66878	5.81787	5.96169	5.90113	6.01114	6.5693	6.50956	5.84928	5.72584	5.87315	5.90212	5.95692	6.00273	5.92708	5.83857	5.62718	5.7838	5.83454	5.92707	5.81281	5.88442	5.81159	5.96822	6.0029	5.85108	6.45226	6.26226	6.28877	5.86069	6.05157	5.94877	5.89248
1700022C21Rik	7.51257	7.86647	7.35661	7.60201	6.3525	7.37104	7.43473	8.56007	8.18709	7.99569	7.75238	8.0188	8.51056	9.29382	9.10938	9.1682	9.2805	9.06349	8.33335	8.57994	8.57596	8.24129	8.40982	8.2511	7.53545	6.66723	6.03956	6.92499	7.14107	7.51881	8.09244	8.04825	7.95635	7.62198	7.9035	7.73749	8.93774	9.37289	8.9282	9.47635	9.40706	9.05813	8.71364	8.40144	8.08597	9.41304	7.85311	8.85834	7.27511
1700024G13Rik	5.05976	4.9751	4.94844	4.95985	4.96758	5.0282	5.03238	4.93731	4.94959	4.96327	4.94749	4.97933	5.19878	5.36046	5.51124	6.03762	5.85727	5.76684	5.06729	5.15815	5.06334	5.05874	5.02562	5.04769	4.98324	4.87902	5.14956	5.04378	5.0215	5.02851	4.83747	4.95668	5.06534	5.0362	4.90951	5.01293	5.39924	5.19565	5.35078	7.552	7.42036	8.33637	4.96085	4.84767	4.96126	5.03065	5.08966	5.04638	5.01021
1700025G04Rik	10.5928	10.419	10.6957	10.3896	10.5446	10.727	10.1058	10.4566	10.3313	10.6845	10.4148	10.032	8.79522	9.41247	9.45319	9.45162	9.19061	9.23135	9.47152	9.42071	9.28151	9.16641	9.66331	9.95055	10.592	10.4682	10.5743	10.7066	10.4255	10.5261	9.71378	10.2087	10.4632	10.2815	9.97655	10.3736	9.30692	9.6013	9.46288	9.63849	9.50259	9.30008	10.096	9.90497	9.21422	8.90184	9.12704	9.47917	10.3524
1700025G04Rik	5.81377	5.60406	6.21025	5.61696	5.22938	5.8868	5.30068	5.24224	5.63429	5.91715	5.32341	5.40282	5.19143	4.82802	4.95985	5.05144	5.00089	5.10147	5.08653	5.24312	5.09941	5.07574	5.0942	5.24629	5.65044	5.6636	5.64103	5.62307	5.80614	5.74781	5.65095	5.72563	5.62039	5.59975	6.02715	5.40932	4.87439	5.02268	4.98821	5.06542	5.06347	5.13767	5.54238	5.16824	5.03321	5.05198	5.05002	4.74511	6.88649
1700025K23Rik	7.10803	6.43651	6.1276	6.66646	6.59853	6.41252	6.55499	6.23916	6.60607	6.49063	6.22978	5.84175	6.29437	6.04623	5.91371	6.16742	6.78389	6.21042	6.34249	6.60835	6.20922	7.33088	6.66768	6.01978	6.73291	7.39513	6.41721	6.77467	6.13619	6.20287	6.29452	6.22272	7.25548	6.64835	6.06581	5.95742	6.42135	6.23132	5.85153	6.4008	6.39452	6.36705	6.48114	6.40033	6.08256	6.59668	6.58896	6.55222	6.71802
1700026D08Rik	5.01409	5.10685	5.01293	5.11144	4.93724	5.15459	6.09045	7.01062	5.83025	6.18237	5.34899	6.50848	5.29208	5.38477	5.49305	5.38286	5.12804	5.17612	5.71312	5.58436	5.21095	5.05515	5.0251	4.98065	5.38574	5.4857	5.01646	4.99801	5.00758	5.12052	7.99191	7.65683	5.50087	5.4038	5.50623	5.50155	5.14425	5.49881	5.40832	5.00614	5.04456	5.22343	4.9431	4.86462	4.91107	6.50246	6.90929	6.66977	5.18847
1700028I16Rik	5.63316	5.48806	5.65314	5.42011	5.9662	5.53418	5.54633	5.78741	5.55861	5.60509	5.50927	5.38103	5.81427	6.23426	5.97525	6.05556	6.1284	6.24324	5.61634	5.51371	5.61928	5.62859	5.53037	5.56772	5.53162	5.55058	5.60288	5.5128	5.41046	5.6817	5.45108	5.52197	5.44062	5.52715	5.44211	5.44987	5.76671	6.08288	5.75799	6.09193	5.86224	5.75248	5.36747	5.55583	5.35774	5.71752	5.46147	5.58077	5.55228
1700028K03Rik	5.38775	5.53292	5.4399	5.54213	5.55448	5.39819	5.53523	5.60283	5.53316	5.70287	5.45631	5.50286	6.06213	6.4986	6.79726	6.12144	6.07535	6.62128	5.52427	5.56191	5.54881	5.31544	5.4139	5.5196	5.54973	5.46596	5.39094	5.25806	5.32803	5.48686	5.74783	5.61967	5.57517	5.78409	5.64082	5.5833	7.19306	6.97872	6.58709	6.69234	7.00878	6.86467	5.70907	5.3762	5.3817	5.46353	5.49799	5.61793	5.73961
1700029F09Rik	8.73579	9.31013	9.07735	9.06831	8.81022	9.06787	9.06903	9.16605	9.21433	9.18449	8.95185	8.77809	10.2415	10.2906	10.074	10.3809	10.3126	10.4161	8.11767	7.67946	7.3984	8.89126	8.68365	8.72269	8.99835	8.69014	8.65598	8.78521	8.8128	8.41237	8.65215	8.98456	8.44685	8.86489	8.95444	9.20151	10.4008	10.6359	10.4213	10.6575	10.6371	10.4572	9.61171	9.57163	9.43543	8.33813	8.06312	7.82686	8.89771
1700029G01Rik	6.08514	6.04939	6.2473	6.08869	6.28579	6.2771	6.42982	6.60503	6.56262	6.40924	6.21752	6.22261	5.91556	6.0304	6.1051	5.97804	6.09926	6.11698	7.6894	7.7547	7.46205	6.71557	7.18754	6.49802	6.16313	6.0282	6.2235	6.13451	6.2757	6.14998	6.7327	7.25704	6.66463	6.23114	6.34011	6.17321	5.91678	6.13472	6.09528	6.05869	5.88683	6.08964	6.05922	5.96187	6.54398	8.18558	6.91885	7.78388	6.44049
1700029I15Rik	6.06114	5.90422	6.30281	6.08132	6.35734	6.16013	6.09296	6.04647	6.16494	6.03219	5.89574	6.38957	6.13656	6.15462	6.09838	5.89992	5.95202	6.17705	6.54967	6.20819	6.44665	6.47297	6.24019	6.30648	6.24364	6.16682	6.38952	6.48955	6.01257	6.14291	6.22868	6.16684	6.03603	6.05287	5.97644	5.90433	6.28948	6.18219	6.36508	6.07826	6.17996	6.04206	6.15391	6.14086	6.11481	6.32168	6.11874	6.22694	6.57275
1700029J07Rik	6.02802	6.18916	6.40991	6.00089	6.75004	5.95969	6.56959	6.64525	6.53672	6.72706	6.39678	6.49999	6.51687	6.48426	6.58758	6.47159	6.54852	6.58294	6.78191	6.46785	6.6129	6.41792	6.46392	6.24789	6.38326	5.73002	6.60119	6.2723	5.82696	6.26099	6.6876	6.57599	6.17127	6.57759	6.8693	6.26025	6.81177	6.95088	6.75431	6.87367	7.36508	7.48207	6.54633	6.02985	6.83695	6.90519	7.19822	6.51532	6.12683
1700029P11Rik	5.29362	5.23437	5.27405	5.22437	5.32409	5.39443	5.2945	5.1702	5.27414	5.26232	5.20124	5.0132	5.96515	6.94428	6.42486	6.04557	6.17646	6.04699	5.33757	5.29952	5.33613	5.30732	5.19816	5.40708	6.15333	5.44611	5.34465	5.42108	5.3731	5.29372	5.40343	5.28181	5.35085	5.38189	5.17599	5.32862	6.43649	5.86765	5.93841	6.34811	5.99119	6.08182	5.37177	5.20415	5.3615	5.31944	5.25862	5.31673	5.32086
1700030J22Rik	6.26114	6.10873	6.18917	6.20299	6.48918	6.27703	6.25498	6.19181	6.37384	6.20141	5.9338	6.24705	6.90062	6.94153	7.89432	7.19357	7.25706	7.15603	6.25151	6.40862	6.22551	6.38469	6.30057	6.08933	6.26728	6.37318	6.39957	6.40966	6.38456	6.37792	6.19908	6.29566	6.19951	6.3958	6.28897	6.09635	6.865	7.06411	6.76215	7.03981	7.5648	7.17593	6.19258	6.2735	6.20018	6.29402	6.42302	6.4342	6.73676
1700030K09Rik	5.66893	5.6377	5.42818	5.60753	5.29182	5.40799	5.86355	5.81254	5.7579	5.70616	5.73922	5.9746	6.01494	5.79912	6.01447	5.86781	5.72092	5.86079	5.87378	6.11201	5.6873	5.81799	5.82061	5.9108	5.49739	5.74912	5.51594	5.58914	5.62024	5.66076	6.52601	5.97682	5.68224	6.19221	5.93695	5.63208	5.64336	5.86573	5.92343	5.82689	5.9793	5.81151	5.83537	5.94291	5.99642	5.82513	5.87389	5.87305	5.5976
1700034H14Rik	10.0365	9.82781	9.58141	9.85795	8.69312	9.73381	10.3063	9.43108	10.6675	10.4271	10.1845	10.6497	8.82443	9.44537	9.15687	10.4498	9.51487	9.18493	10.9085	10.3191	10.3366	9.85779	9.99502	10.1468	9.95753	9.75462	9.78991	9.80465	9.56793	9.85199	10.2726	10.3168	9.84461	9.7713	10.0506	10.3497	9.31617	9.33669	9.69336	10.0132	9.99309	9.90886	10.3309	10.585	9.64546	10.0551	10.5284	10.5521	10.0677
1700034J05Rik	6.62862	5.54812	5.72467	5.76136	5.60088	6.15358	5.42067	5.47256	5.38815	5.65742	5.68414	5.60379	5.377	5.47935	5.33372	5.42559	5.26575	5.34759	5.43206	5.34206	5.56152	5.45184	5.91935	6.40795	6.33618	6.19078	5.88322	6.59615	5.99777	6.21185	5.44065	5.50512	5.46649	5.94254	5.55029	5.81891	5.30573	5.24643	5.42535	5.27224	5.31189	5.51574	6.63017	5.49558	5.91185	5.49709	5.31757	5.42424	5.65954
1700037C18Rik	5.99851	5.8547	6.05551	6.03459	6.03367	6.0998	6.0767	6.02964	6.03971	6.09568	5.87195	5.94464	5.88715	5.81619	5.98113	5.94401	5.86875	5.97385	6.27114	6.45672	6.16059	6.26835	5.94913	6.28129	6.03844	6.0011	6.15037	6.0994	5.95464	6.23677	5.90251	5.86062	5.99646	6.02015	5.71462	5.93917	6.06949	5.7238	6.1457	6.09212	5.92187	6.06355	5.83121	5.99029	5.99453	6.11992	6.17061	6.02749	6.14344
1700037H04Rik	7.30484	7.49594	7.27146	6.92973	7.40269	7.53458	7.41505	7.27572	7.51079	7.22685	7.29421	7.79068	8.00756	8.0631	7.70759	7.93897	8.24137	8.30047	7.16847	7.31674	7.28656	7.07761	7.10019	7.13067	7.12618	7.27744	7.48594	7.39991	7.34011	7.40985	7.71062	7.46283	7.68934	7.46418	7.50327	7.52123	7.894	7.83435	7.94933	7.77808	7.88022	7.59101	7.43782	7.59746	7.54903	7.55294	7.42132	7.47933	7.26286
1700039E15Rik	10.1407	10.3221	10.3324	10.2807	10.4427	10.0597	10.0811	10.2156	10.1391	10.2108	10.3046	10.0974	10.533	10.5027	10.2458	10.3475	10.633	10.2498	10.1883	10.2698	10.2659	10.057	10.2587	10.1498	10.1942	10.2154	10.1865	10.1995	10.2449	10.2015	10.032	10.3111	10.2068	10.0785	10.0101	10.0215	10.5178	10.5546	10.2234	10.6208	10.4533	10.8138	9.77214	10.1497	9.9432	10.0984	10.1626	10.2076	9.97002
1700040I03Rik	6.25089	6.24736	6.40232	6.28322	6.32702	5.75754	5.68732	5.96352	6.04501	5.66322	5.56656	5.75275	5.97829	7.18739	6.75179	7.15854	6.80227	7.17181	5.31345	5.60012	5.50995	5.73717	5.56271	6.10871	5.58112	6.27642	5.98531	5.93974	5.95611	6.03325	5.4664	5.91996	5.65616	5.44814	5.63624	5.70532	7.13474	6.63182	6.39241	7.16211	7.48709	6.8092	5.6859	6.14961	5.71027	5.60639	5.15829	5.58508	6.09277
1700047G07Rik	9.30424	8.83266	9.16221	8.09133	7.49692	9.79509	6.27545	6.85079	6.50075	6.53783	7.21536	5.94816	8.77874	8.98262	9.16547	8.97594	9.19543	9.09948	4.69127	4.86337	5.22483	4.81261	4.58097	5.07668	9.60176	9.66352	9.81342	9.58271	9.34263	9.44744	7.1055	6.32056	5.07526	7.42352	6.17282	6.1432	9.10546	9.00879	8.93423	8.86782	8.93612	8.79563	4.29756	4.28918	4.34798	5.90385	6.48328	5.88369	9.81901
1700048O20Rik	7.11043	7.51523	6.77991	6.79597	6.42976	6.62538	8.45304	8.36227	8.09702	8.09021	7.52431	7.22768	8.10714	8.29283	8.58353	8.07208	8.20623	7.78397	7.95337	7.48222	7.74623	7.55074	7.09462	6.62565	7.57711	6.70573	6.94719	7.2301	7.356	7.23211	8.43892	8.88441	7.92747	8.51871	7.74157	7.75356	8.53662	8.88975	9.06379	8.10879	8.45978	7.88198	6.90077	6.46163	7.29524	8.80935	7.93298	8.70264	8.26372
1700049G17Rik	5.84766	5.77543	6.00456	5.81462	5.80064	6.02011	6.53663	6.05914	6.55859	6.34388	6.2257	5.88275	5.48475	5.71407	5.7493	5.7498	5.89421	5.73329	6.51541	6.12047	7.18405	5.77972	6.44014	6.2956	5.64832	6.08309	5.72885	5.83472	5.75924	5.88371	6.40129	7.28341	6.53216	6.33657	6.5922	7.05311	5.71439	5.67629	5.76126	5.88199	5.69217	5.79324	6.29374	6.39145	6.52273	7.06101	6.36397	6.63332	6.14871
1700052K11Rik	6.2865	6.1577	6.48792	6.17867	6.22533	6.53284	6.31753	6.30972	6.38624	6.1922	6.20409	6.16701	6.08174	5.91289	6.18026	6.14119	6.02954	6.13147	6.32649	6.30823	6.73355	6.17458	6.39756	6.28105	6.23353	6.28507	6.49846	6.26262	6.23234	6.30855	6.36476	6.3781	6.24072	6.2879	6.20624	6.4373	6.20442	6.07608	6.20264	6.12973	6.13148	6.10684	6.22556	6.15896	6.29552	6.33406	6.24657	6.2992	6.3475
1700052N19Rik	6.64007	6.67266	6.52548	6.54417	6.75589	6.54435	7.10171	6.88939	7.04763	7.23068	6.47875	7.01582	7.2362	7.25571	7.1644	7.18518	7.73651	7.34222	7.46994	7.28002	7.74476	6.92693	7.33108	7.61694	6.593	6.90372	6.92466	6.72446	6.54664	6.43961	7.13839	7.40474	7.00194	6.6025	6.94203	7.10203	7.10423	7.31171	7.12859	7.67943	7.77042	7.29861	7.03868	6.92516	7.48212	7.71679	7.58673	7.54808	6.84177
1700054N08Rik	6.34873	6.39979	6.38712	6.23864	6.47254	6.65534	6.16906	6.15044	6.18914	6.26682	6.27137	6.05751	6.25382	6.34204	6.35209	6.26972	6.11446	6.33559	6.13928	6.21705	6.21577	6.2514	6.1263	6.17888	6.43688	6.23818	6.35164	6.48441	6.36967	6.42615	6.25925	6.13917	6.10327	6.28682	6.05382	6.10057	6.36087	6.25382	6.32883	6.1858	6.4585	6.3269	6.07061	5.96878	5.99354	6.22402	6.32766	6.18736	6.4213
1700056E22Rik	5.80421	5.91602	6.23831	6.18864	5.77727	5.59439	5.79408	5.57158	5.78792	5.46305	5.70614	5.46631	5.49587	5.69117	5.73878	5.66203	5.52297	5.67047	5.79959	6.17599	7.30946	5.55873	5.73741	6.5632	5.95518	6.0189	6.42566	5.61606	5.74105	5.7862	5.64445	6.03742	5.6709	5.67502	5.42175	5.63712	5.46083	5.7396	5.4937	5.70536	5.53916	5.64715	5.78074	5.63413	5.52932	6.27964	6.61139	5.8364	6.32862
1700066M21Rik	6.69504	6.66748	6.53524	6.6338	6.81489	6.88818	6.62585	6.55812	6.50186	6.6142	6.66286	6.62385	6.54112	6.64776	6.72469	6.63956	6.6036	6.74467	6.98919	6.94723	6.85304	7.05675	6.81419	7.16369	6.49434	6.87456	6.70738	6.81867	6.54581	6.78146	6.6144	6.71222	6.43082	6.87411	6.54951	6.68633	6.62531	6.50117	6.6896	6.7697	6.48487	6.72038	6.41655	6.72804	6.32219	6.96974	6.86372	6.84147	6.70958
1700071K01Rik	6.91664	7.20175	6.93438	6.76301	6.58283	6.99541	7.06492	7.02937	7.01065	7.27861	6.69027	6.67791	8.12646	7.74327	7.76529	7.79174	7.65991	7.69961	7.23046	7.50201	7.19164	7.78194	7.40456	7.24102	6.43888	6.82258	7.08629	7.04604	7.33659	7.19112	7.18137	6.90526	7.15583	7.21106	7.12849	7.15077	7.74429	7.77275	7.91168	7.75869	8.21502	8.00318	7.03615	7.19564	7.5241	7.23675	7.55525	7.2693	6.9825
1700072H12Rik	5.87526	5.77812	5.81464	5.84524	6.4301	5.7896	5.76596	5.61922	5.87153	5.73092	5.60119	5.66402	5.89103	6.04345	5.82273	5.81803	6.13081	5.88448	5.92424	6.03654	5.81931	5.92659	5.91127	5.66905	5.84223	5.99338	5.72215	5.97839	5.92199	5.86221	5.59437	5.77234	5.70351	5.73729	5.69485	5.69191	5.87706	6.03281	6.25916	6.01599	5.97356	6.02975	5.74881	5.72546	5.90203	5.7656	5.78555	5.76162	6.16796
1700081L11Rik	8.84819	8.61456	8.48834	8.58553	5.69673	8.97412	9.33739	6.51304	8.90257	8.80621	7.81959	8.32209	9.16238	8.7879	8.94431	8.65778	8.19003	8.61794	8.75231	8.29426	9.26301	8.29668	8.70461	8.85739	8.01826	9.12501	9.28857	8.41347	8.61078	8.30594	7.99437	8.68699	8.46172	9.12113	8.917	8.64151	8.54692	9.20737	9.02055	9.22486	8.57985	9.41502	8.77914	7.8568	7.72212	8.67737	9.48909	8.57269	8.70156
1700081L11Rik	9.21337	9.31551	9.31236	9.27727	7.86827	8.31389	9.67344	9.51441	9.52651	9.35176	9.57154	10.0762	9.23542	9.33012	9.25321	9.48428	9.4021	9.39197	9.55154	9.45903	9.55647	9.30058	9.59351	9.50523	9.18747	9.18648	8.99185	8.89145	9.31196	9.09954	9.84259	9.60336	9.58443	9.70653	9.41346	9.68537	9.48332	9.6693	9.56094	9.5529	9.65981	9.69977	9.29835	9.42602	9.4506	9.72926	9.54814	9.58715	8.98176
1700084J12Rik	5.62478	5.4549	5.52713	5.82352	6.1266	5.41073	5.75385	5.84068	5.59235	5.7099	5.53992	5.43948	5.88503	5.70045	5.6133	5.64157	5.61036	5.63869	5.88062	5.95324	5.53341	5.67362	5.47397	5.35863	5.15885	5.59	5.61912	5.57325	5.62681	5.62832	5.74829	5.54567	6.09357	5.86772	5.62743	5.68254	5.59352	5.39907	6.04216	5.5998	5.72124	6.04928	5.66412	5.44	6.11729	6.46585	5.43774	5.80254	5.28552
1700086O06Rik	5.66827	5.75447	5.75014	5.68357	5.90812	5.95754	5.76132	5.77222	5.61075	5.75556	5.79547	5.82573	5.84757	5.81964	5.90817	5.81449	5.74337	5.68868	5.84257	5.76301	5.84233	5.6613	5.82998	5.69398	5.69696	5.70901	5.71775	5.8088	5.82375	5.73175	5.55099	5.71856	5.68241	5.75032	5.75037	5.61828	5.88635	5.72965	5.73899	5.94558	5.8187	5.79138	5.78248	5.83987	6.05159	5.69319	5.95077	5.87058	5.76039
1700090G07Rik	5.96621	5.85915	5.92466	6.06306	6.13658	5.96203	5.92617	6.0701	6.00812	6.02197	6.00213	6.07836	6.03924	5.85298	5.78799	5.90871	5.82045	5.89854	6.08716	6.10424	5.9465	6.11604	5.95037	5.81975	6.02847	5.91812	5.92018	6.0797	5.80451	5.99762	5.99183	5.89849	5.9819	6.04954	5.90529	5.94885	5.8981	5.85539	5.87012	5.99303	5.92819	5.93343	5.84938	5.89084	5.98966	5.838	6.02439	5.89473	5.9896
1700094D03Rik	7.18835	7.44706	7.3641	7.32775	8.37682	7.24309	7.71564	7.6276	7.31584	7.01351	6.86979	7.73366	7.39951	7.83925	7.63851	7.10725	7.78313	7.26888	6.99295	7.47531	6.51947	6.49783	6.37406	7.37869	7.89178	7.56597	7.03629	6.77255	7.05151	6.90722	6.7976	6.8899	6.95216	6.34541	7.28129	6.95279	6.51384	6.78175	8.20982	7.61447	7.37951	7.65587	7.22138	6.58652	7.48248	6.93421	6.60004	6.95016	7.63514
1700104B16Rik	5.38427	5.19656	5.54661	5.48387	5.32722	5.2273	5.04441	5.13257	5.24274	5.8101	4.96904	4.95717	5.14558	5.0757	5.30642	5.18556	5.21891	5.05875	5.39413	5.4182	7.57013	7.08983	5.83995	5.69048	5.38671	5.38147	5.44079	5.02926	5.14688	5.2359	5.31608	5.41097	5.26774	5.16399	5.13643	5.07364	5.13739	5.07081	5.21467	5.21794	5.155	5.21725	6.21644	6.07145	5.07342	7.11272	10.0649	6.63485	5.11827
1700106N22Rik	6.91652	7.3873	7.0441	7.12563	6.82736	6.55313	6.8992	7.06671	7.26596	7.16892	6.52365	7.78928	6.54077	6.90971	7.1757	6.79011	7.27622	7.00959	6.93517	6.65521	7.81749	6.41655	6.75655	6.84126	6.70444	6.9804	6.38141	6.59847	6.62261	6.85758	7.23066	6.82718	7.01009	6.64321	6.83857	6.99684	7.63301	7.63564	7.34126	7.37372	7.31309	6.97018	6.52704	6.45068	6.77692	6.99213	6.15272	6.74953	7.74387
1700109F18Rik	7.64378	7.79933	7.68921	7.12543	6.77905	7.5021	8.48126	8.55754	8.53707	8.73833	8.68919	8.25413	7.06206	6.63649	7.1169	6.8406	6.77224	6.72428	7.55064	7.67581	7.58184	7.45616	7.30108	7.49092	7.721	7.36222	7.80203	8.15409	7.74347	7.97495	8.68738	8.22849	8.79983	8.9669	9.14702	8.64785	6.79279	6.51281	6.95038	6.71564	6.56863	6.72466	6.82951	6.53272	6.69025	6.82676	7.61805	7.11645	8.10903
1700112E06Rik	5.44666	5.42554	5.4742	5.40579	6.06283	6.11621	4.96256	5.21356	5.44253	5.06328	4.90044	5.11612	4.93476	4.97274	4.97263	4.97888	4.8564	5.17484	5.22228	5.1655	4.98083	5.08226	4.91142	4.96487	5.61432	5.84615	5.24885	5.24682	5.30161	5.35325	4.92192	5.18444	5.23542	5.01304	4.96088	4.85161	5.00845	4.86249	4.99883	5.05026	5.13988	4.99041	4.97652	4.85091	5.08656	5.06021	5.02249	5.51314	5.77963
1700116B05Rik	5.63168	5.49324	5.55281	5.52576	5.47239	5.58522	5.6096	5.57693	5.47532	5.51479	5.48732	5.3581	5.83504	5.53038	5.59246	5.86077	5.54312	5.71409	5.686	5.68742	5.6449	5.86811	5.67413	5.59835	5.42542	5.58958	5.6673	5.95686	5.49441	5.58083	5.46366	5.46187	5.45554	5.5903	5.4377	5.41012	5.7753	5.7596	5.48183	6.47253	6.51659	6.04971	5.45795	5.37769	5.47555	5.57706	5.67842	5.5699	5.68012
1700123I01Rik	5.01083	4.92586	5.15682	5.05019	5.18527	5.27647	4.99302	5.01155	4.94948	4.97771	4.98349	4.98767	5.05374	5.20532	5.01466	5.07978	5.0421	5.03131	5.15666	5.05154	5.13408	5.05843	5.09817	5.04146	4.92335	4.9355	5.31409	5.09436	4.94908	5.08279	4.96997	4.91533	5.06507	5.04167	5.01514	5.03343	5.4638	5.41258	5.01507	5.06995	5.09417	5.0575	4.96499	5.08708	5.04415	5.08944	5.02633	5.05617	5.06417
1700123O20Rik	8.87009	9.14329	9.11846	9.29673	9.93814	9.40991	9.06296	9.45178	9.05541	9.46856	9.27938	9.02699	8.7597	8.73928	8.94657	8.61069	8.77205	8.73186	9.49059	9.37874	9.30047	9.0661	9.07974	9.40512	9.21924	9.07281	8.99899	8.87816	9.0503	9.10258	9.08274	9.37967	8.81448	8.61369	9.07607	9.34834	8.44409	8.18903	8.76117	8.79378	8.77037	8.45962	9.08644	8.97986	9.25245	9.14009	9.30739	9.24622	9.01741
1810006K21Rik	8.10353	8.43731	7.83636	7.79743	7.81754	7.79899	8.27572	8.48645	8.4678	8.5183	8.04703	7.87632	8.46034	8.71176	8.83792	8.60458	8.81919	8.49286	8.28065	8.28547	8.40707	8.10488	8.55475	9.13838	8.35179	8.12007	8.21438	7.92711	8.41184	8.4198	8.83317	8.60032	7.92406	8.33351	8.10129	8.2778	9.00078	9.25706	8.85871	8.79122	8.7411	8.81108	8.20444	8.67252	8.39977	8.18237	8.70417	8.33667	8.17313
1810009A15Rik	9.07677	9.04276	9.13116	9.11825	9.03477	8.44477	9.11352	9.15989	9.21059	9.22527	9.23834	8.74957	9.27581	9.24272	9.40019	9.35036	9.6289	9.39785	9.00213	8.28792	9.04598	8.9574	8.83618	8.86782	9.25376	8.99102	9.05286	8.84677	8.94618	8.93332	9.0651	9.27368	8.88011	8.86712	9.07039	9.06147	9.01236	8.92278	9.1633	9.19844	9.30464	9.31057	9.52998	9.32509	9.17156	8.93469	9.04446	8.88307	9.10915
1810010K12Rik	5.96795	6.1541	6.05789	5.98913	6.05393	6.06788	5.96483	5.76766	5.78212	5.85929	5.81142	5.83045	5.9834	6.00268	5.96789	5.93306	5.95675	5.93437	5.97584	5.90388	5.919	6.08308	5.93275	5.87458	6.08111	5.92585	6.06106	6.09411	5.93692	6.05825	5.87187	5.8112	5.81725	5.93603	5.83438	5.76195	6.02289	5.74845	5.94514	6.10588	5.91438	5.94495	5.99848	5.86905	5.90122	5.86305	5.8848	5.76716	5.8586
1810011H11Rik	6.20869	6.1128	6.0335	6.25325	5.92362	6.01621	5.12931	5.12593	5.25303	5.4283	5.31293	5.14632	5.23054	5.37418	5.26433	5.31671	5.40863	5.20393	5.37101	5.37239	5.57464	5.34181	5.31545	5.52032	6.30076	6.88998	5.53415	6.56459	5.54828	5.58534	5.10755	5.26615	5.4155	5.235	5.25413	5.13402	5.30007	5.21769	5.31376	5.36176	5.31978	5.17461	5.28953	5.1766	5.17456	5.36803	5.3863	5.13378	5.39286
1810011O10Rik	12.2282	12.0308	12.224	12.1171	11.7662	12.0397	10.3937	10.5125	10.6462	10.6728	10.6459	10.2126	7.8837	7.94531	7.62235	7.44783	7.8273	7.6567	8.73675	9.2231	8.11489	10.08	9.04601	9.00041	11.9711	11.94	12.1576	11.924	11.7475	12.0089	10.181	10.5595	10.6025	10.2927	10.5264	10.4047	7.89058	5.45157	6.50739	6.35247	5.89669	7.13492	7.80469	7.8677	7.84536	8.30414	8.21098	8.13925	12.4312
1810012P15Rik	6.1328	6.23186	6.06275	6.19077	6.38797	6.11785	6.38977	6.35146	6.50366	6.43182	6.25071	6.20618	6.34775	6.53464	6.41766	6.3807	6.55644	6.5313	6.57317	6.40823	6.74616	6.09438	6.3168	6.24144	6.24298	6.12603	6.20805	6.34302	6.10101	6.28002	6.31642	6.35289	6.17684	6.45355	6.33973	6.24533	6.65821	6.72461	6.91177	6.67198	6.58724	6.44137	6.49283	7.20279	6.56688	6.98825	6.57479	7.18196	6.15711
1810013D10Rik	5.50773	5.60008	5.23406	5.66511	5.55328	5.04721	5.1988	5.55798	5.65701	5.59293	5.63839	5.97906	5.0132	5.42538	5.76484	5.44773	5.28755	5.09822	6.19523	5.86383	5.8443	5.33229	6.08623	5.68651	5.33731	5.21668	5.27106	5.58648	5.53983	5.72907	5.66759	5.75306	5.56857	5.88201	5.75028	5.78786	5.24097	5.79368	5.28417	5.37422	5.44813	5.437	7.22584	7.71918	7.26695	6.12711	5.74216	5.75442	5.11552
1810013D15Rik	5.66721	5.85698	5.57505	5.64369	5.41234	5.52154	5.90906	5.94469	5.998	5.92689	5.84518	5.58584	5.74238	5.70895	5.82147	5.91883	5.95053	6.24825	6.08615	6.1533	6.15382	6.77116	6.19049	6.04944	5.54165	5.77944	5.80411	5.57523	5.60407	5.76937	5.72784	6.10584	6.02783	5.91436	5.99504	5.68974	5.92513	5.7534	5.70876	5.78226	5.97152	5.96	5.63187	5.68988	5.51951	6.01641	6.95489	6.37369	5.77228
1810013L24Rik	9.60535	9.39619	9.4388	9.71945	9.84374	9.71766	9.56638	9.33137	9.51294	9.17216	9.07047	8.92461	9.67536	9.60996	9.64529	9.39195	9.58775	9.87985	9.81302	9.63114	9.64374	9.24297	9.30411	9.21338	9.65918	9.55065	9.1443	9.48926	9.43042	9.56753	9.02689	9.13946	8.3596	9.27401	8.94481	9.29209	9.45722	9.57125	9.74206	9.48153	9.35572	9.63974	9.49908	9.25732	8.74749	9.49003	9.40455	9.45677	9.60097
1810014F10Rik	7.61657	7.44779	7.41135	7.64208	7.38717	7.30831	7.41564	8.07576	8.25748	7.98919	7.76468	7.80394	7.34664	7.57578	7.66378	7.33991	7.74164	7.56393	7.95686	8.72658	7.85694	7.34766	7.44179	8.41874	7.43939	7.22338	6.95961	7.61937	7.06815	7.03339	8.44648	8.11101	6.95502	7.44804	7.61002	7.46335	7.46362	6.84056	7.37937	6.43783	7.03526	6.89696	8.1802	8.60389	8.57291	8.2399	8.05465	8.11255	7.38166
1810020D17Rik	8.22498	8.4891	8.03453	8.29251	8.87752	8.16072	9.13703	8.83436	8.93077	9.10233	9.15875	8.44489	8.16138	8.3776	8.19413	8.19761	8.34977	8.20218	9.03343	9.80856	9.12653	9.36718	9.68661	9.64225	8.37729	7.92307	8.04137	8.33913	8.22399	8.32246	9.07621	9.13596	8.06911	8.83647	8.95026	8.78452	8.74084	8.74596	8.25363	8.25716	8.31469	8.16076	9.52165	9.65221	9.83352	9.4425	9.73817	9.4989	7.79979
1810022K09Rik	6.42136	6.30001	6.70022	6.5169	6.54681	6.80456	6.51513	6.41252	6.06796	6.26127	5.61385	7.166	6.89015	6.92556	6.47573	6.89949	7.23435	6.67552	6.36755	6.02319	6.37436	5.96972	6.64113	6.25757	6.25922	6.30292	6.7927	6.14302	6.29719	6.35594	6.62324	7.32503	7.6269	5.60763	6.52495	6.3593	6.40873	5.4494	6.47744	6.58493	6.5687	6.11638	6.33166	6.29742	7.83418	6.48254	8.35203	5.8973	6.43874
1810026J23Rik	5.9683	6.28563	6.05554	6.19804	6.06906	6.07007	6.21784	6.1671	6.13254	6.21034	6.29517	6.59629	6.30275	6.25058	6.12526	6.04244	6.22071	6.00199	5.96098	6.09005	5.95663	6.06593	6.29691	6.12318	6.04393	6.23668	5.77135	5.99951	6.03856	6.0864	6.06648	6.19406	6.23468	6.11848	6.01561	6.2356	6.25971	6.35788	6.05021	6.26313	6.19393	6.16425	5.98598	6.228	6.21087	6.05735	6.17304	6.00529	6.0706
1810027O10Rik	8.41893	8.7258	8.67183	8.69115	8.52151	8.43325	8.4445	8.70784	8.36762	8.83369	8.90316	8.87095	8.83531	9.38398	9.08209	8.94265	9.09758	8.6255	9.03861	9.20791	8.77365	9.77473	8.59901	8.56448	8.70293	8.30158	8.81904	8.22258	8.51323	8.52323	8.36531	8.62506	8.59714	8.3887	8.57792	8.41325	8.94419	8.4381	8.61938	8.81991	8.69591	8.71381	8.13328	7.76574	7.94432	9.14128	9.50085	9.10914	8.65576
1810029B16Rik	6.92425	6.88395	7.00097	6.61411	6.55255	6.5592	6.93445	7.01946	7.06168	7.14808	7.87583	7.06511	7.92753	8.22698	7.42282	8.10668	8.20777	8.0654	7.3296	7.12083	7.16581	6.91339	7.20604	7.13139	6.66135	6.56462	6.26954	7.16841	7.12182	6.95078	6.78257	6.89197	6.62683	6.99315	6.94698	7.27543	7.79093	7.23052	6.84129	7.87178	7.84323	7.70446	6.9927	7.11854	7.12427	7.15805	6.7948	7.00184	6.49294
1810030N24Rik	5.76671	5.9683	5.82149	5.7774	6.52381	6.09042	6.24137	5.9562	6.11041	6.27902	5.85324	5.86384	5.70569	5.90094	5.6259	5.78221	5.97784	5.91029	6.07818	5.94404	6.68063	5.76497	6.03881	5.80277	6.00395	6.26331	5.94019	5.7661	5.80803	5.60912	5.78519	6.10284	5.81392	5.9909	6.07041	5.90316	5.9925	6.03957	5.737	6.24656	6.47241	6.28736	5.83786	5.93176	6.22151	6.54783	6.26833	6.19649	5.81236
1810030O07Rik	7.79515	8.03555	7.82114	7.89083	7.78403	7.61881	8.27074	7.94566	8.24777	8.21759	8.0941	8.30927	8.68107	9.22984	8.95218	8.36543	8.49003	8.4275	8.87095	8.89506	8.52836	7.45808	8.258	9.08599	8.01516	7.72129	7.5525	8.02861	8.13222	7.98098	8.07407	8.42636	7.92793	8.29296	8.56467	8.10524	9.20031	9.09724	9.26586	8.56088	8.44346	8.33202	8.61684	8.18554	8.31672	8.33967	8.18719	8.48627	8.28111
1810031K17Rik	6.05974	6.15545	6.06278	6.26458	6.12556	6.34261	6.46214	6.14951	5.91495	6.1534	6.37424	6.32263	6.21994	5.9823	6.09603	5.72088	5.92148	5.97238	6.12135	6.64475	6.40653	6.14652	6.05333	6.35121	6.23559	6.65272	6.49838	5.94169	6.28153	5.99555	6.05707	6.45694	6.11982	6.16572	6.18212	6.33641	5.88777	6.13342	5.98419	5.72544	5.95234	5.86732	5.82714	6.59909	6.09941	6.8443	6.48902	6.50797	6.24097
1810032O08Rik	5.45382	5.63646	5.39221	5.51121	5.85848	5.4556	5.3168	5.46376	5.2934	5.44383	5.23057	5.27638	5.72341	6.10122	6.6012	6.7316	6.65624	5.87895	5.39986	5.22744	5.36912	5.35622	5.24174	5.23815	5.58043	5.14378	5.8387	5.52519	5.5139	5.34429	5.35805	5.38169	5.36653	5.23148	5.20229	5.08208	5.84284	5.72947	5.26637	6.21814	6.21446	6.07657	5.5005	5.38447	5.4388	5.47745	5.36806	5.10796	5.4446
1810034E14Rik	5.57935	5.32869	5.51306	5.23924	5.34225	5.35297	7.88415	5.60751	5.78939	6.28831	5.81723	6.94378	5.23551	5.1828	5.29585	5.37298	5.48584	5.23393	7.82288	8.06602	7.07868	5.43536	6.81885	6.04153	5.35297	5.46295	5.47356	5.82983	5.70805	5.64357	7.18099	6.89978	5.53843	6.90612	6.82896	6.11286	5.16525	5.27063	5.1747	5.45361	5.14082	5.22971	7.68942	7.14867	6.26954	6.11953	8.95697	7.36712	5.2689
1810035L17Rik	10.8806	10.8935	10.9251	11.0054	11.3562	10.959	10.6557	10.7767	10.478	10.7989	10.4394	10.2359	10.4984	10.9713	10.7602	10.7289	11.1005	10.9493	10.375	10.5444	10.3414	10.2471	10.3064	9.88507	11.0675	10.9255	11.1773	10.7893	10.7651	10.6074	10.486	10.863	9.66761	10.1299	10.5192	10.3464	10.7281	10.675	10.2633	10.7262	10.6971	10.446	11.2824	10.9559	10.665	10.5622	9.93396	10.3705	11.0421
1810037I17Rik	8.94691	9.15442	8.95923	9.22228	9.31328	9.21863	9.06514	9.2058	9.27932	9.44456	8.95111	9.09464	9.66631	10.2543	9.83439	9.87587	9.82959	9.703	9.30637	9.29491	9.26153	9.49211	9.61381	9.5348	9.101	9.14099	9.21519	9.01877	9.05409	9.25634	8.71016	8.94203	9.04383	9.23742	9.34912	9.22308	9.68894	9.48887	9.22053	9.68256	9.54892	9.52114	9.81178	9.70096	9.5025	8.86401	9.06956	9.3101	9.14459
1810043G02Rik	5.73593	5.75428	5.70902	5.72348	5.8826	5.63494	5.94911	6.10094	5.75873	5.92777	5.89485	6.05894	5.58607	5.62122	5.58422	5.45569	5.49402	5.51239	6.56027	6.22271	5.70013	5.68662	6.02053	5.97075	5.90296	5.81057	5.7109	5.66341	5.69291	5.74802	5.60169	5.77795	5.50104	5.78229	5.70378	5.71798	5.60032	5.73305	5.53286	5.56226	5.57328	5.57809	5.75445	5.77175	5.66119	5.82383	6.01304	5.92196	5.6963
1810046J19Rik	8.84231	9.06121	9.04984	9.11013	8.60031	7.47668	8.71795	8.82968	9.04725	9.12389	8.9017	8.64642	9.09254	9.51148	9.50878	9.31298	9.29508	9.20733	9.50991	9.48695	9.39282	8.8101	9.84492	9.22819	8.45875	8.442	8.15531	8.95501	8.90438	9.0982	8.68229	8.94469	8.49604	8.86009	8.83519	9.14118	9.83196	9.70071	9.55582	9.25813	9.27848	9.36354	9.87037	10.271	10.2864	9.15388	9.59334	9.5599	8.64091
1810048J11Rik	6.20306	6.61702	6.28846	6.46269	7.17659	6.35981	7.27279	6.70617	6.71067	6.61411	6.766	6.87446	7.1226	7.2879	7.54804	7.23703	7.5325	7.45666	6.73733	6.85793	7.44312	6.49861	6.74062	6.72041	6.49843	6.34667	6.13094	5.98409	6.37731	6.27894	7.11268	7.52618	6.84893	6.67737	6.95535	7.07823	7.26244	6.86149	7.17043	7.01923	7.34902	7.23921	6.84839	6.56283	6.80966	6.90376	6.64763	7.02467	6.45937
1810055G02Rik	6.67232	6.57876	6.68123	6.42928	7.05992	6.46448	7.04705	6.90986	6.98371	7.1971	7.07623	6.59218	6.74323	6.90184	6.80595	7.00305	6.95638	6.92891	6.78362	6.55	6.70871	6.82029	6.87717	6.91388	6.45965	6.88366	6.54939	6.64602	6.59312	6.51884	6.69123	7.39997	6.64056	6.87351	6.66701	7.0271	6.87087	6.64643	6.75314	6.93722	6.82655	7.0557	7.20098	6.93109	7.00138	7.03021	6.78225	6.95739	6.62985
1810058I24Rik	9.00836	9.35199	9.43295	9.19678	9.51675	8.90534	8.98831	9.45915	9.26399	9.73528	9.49984	8.87447	8.1214	8.7677	8.429	8.28239	8.79246	7.4853	9.07888	9.08383	9.28966	9.82316	10.194	9.9092	8.99342	8.85527	8.94388	8.81679	9.37814	9.36043	9.21202	9.59106	8.83714	9.0157	9.45074	9.13296	8.33913	8.35075	8.10831	8.74882	8.52185	8.17299	9.81645	9.577	9.53442	9.54086	10.0813	9.2922	9.28651
1810062O18Rik	6.39506	6.59912	6.22773	6.24196	5.95064	6.69853	6.69404	6.71925	6.6529	6.92499	7.91118	6.77173	6.64846	6.47632	6.14031	6.55093	6.70001	6.16628	5.85405	6.04837	6.2719	6.11435	6.47276	7.71799	6.77668	5.95166	6.4873	6.40743	6.55818	6.29249	7.46502	6.79068	6.80232	7.16276	6.61603	6.65011	6.67054	6.66121	6.30253	6.81523	7.12296	6.57789	6.39924	6.54375	6.60368	5.76787	6.44654	6.8391	6.36583
1810063B05Rik	6.45075	6.25546	6.47724	6.29519	7.0691	6.74011	5.97159	6.49197	6.15205	6.31281	6.33105	5.72009	6.42848	6.44077	6.74879	6.59955	6.7704	6.48285	6.19956	6.23511	6.2021	6.11493	5.87087	6.18784	6.35721	6.72436	6.41533	6.18761	6.10065	6.0912	5.79663	6.20431	5.94927	6.13433	6.00561	6.25103	6.72392	6.72415	6.80295	6.8763	6.606	6.82375	6.05157	6.21618	5.97689	6.63259	6.06697	6.11081	7.0496
1810063B07Rik	7.44337	7.52702	7.54587	7.34324	7.3921	7.11724	7.23042	7.51773	7.29175	7.55698	7.27829	6.71339	7.01771	7.45229	7.36431	7.39639	7.43671	7.4431	7.05246	7.3195	7.48944	7.71387	7.42173	7.50203	7.52265	7.33992	7.25011	6.88754	7.12693	7.24784	7.33153	7.30422	7.21333	7.17195	7.3974	7.57516	7.56712	8.3571	7.55821	7.77156	7.65759	7.46096	7.14496	6.86146	7.24357	7.54099	8.02252	7.76278	7.47902
1810064F22Rik	4.9055	5.06297	4.91792	4.95949	5.06424	5.02661	5.26631	5.20966	5.03905	5.0878	4.9985	5.03361	5.20314	4.95216	5.02034	5.03719	5.10063	5.13548	6.14108	5.95691	5.77588	5.10705	5.25092	5.20743	5.09106	5.10964	5.11465	5.0825	5.24332	5.05152	6.71633	5.94035	5.27853	5.15702	5.48386	5.11648	5.02698	5.087	4.94223	5.04551	4.9939	5.08078	5.61219	5.7382	5.4614	6.76949	5.51521	7.04708	5.12769
1810074P20Rik	8.73394	8.78799	8.65493	8.77843	8.34661	8.43536	9.04776	8.88521	8.90332	8.72994	8.92613	8.99125	8.83409	8.78665	8.72055	8.93206	8.92634	8.90734	8.81058	8.75701	8.72356	8.82089	8.71381	8.90354	8.57749	8.77084	7.73469	8.6673	8.926	8.77427	9.08616	9.06714	8.9925	8.98379	9.04907	9.07526	9.06085	9.00205	9.05738	8.97432	8.96287	8.84422	8.51772	8.61634	8.72669	8.85244	9.18314	9.15689	8.8951
2010002N04Rik	6.18537	6.31076	6.08602	5.89985	6.71593	5.92109	7.6323	6.92058	7.38517	7.79699	7.69964	7.91406	6.69879	6.30658	6.92474	6.32555	6.49205	6.62927	6.0844	6.3831	6.57292	6.76852	7.34728	7.0407	6.43802	6.60479	6.13316	6.23063	6.34229	6.36637	7.19081	7.97657	7.79689	7.56207	7.4672	7.53904	6.31794	5.83134	6.42893	6.38819	6.47305	6.30864	6.87832	6.98465	7.02975	6.33831	6.88547	7.06385	6.40485
2010007H12Rik	5.74405	5.6272	6.04648	5.95687	6.44142	6.20271	5.85394	6.10754	5.93124	6.02807	5.86088	5.94057	6.15997	6.54478	6.30736	6.42139	6.32039	5.89191	6.58615	6.08769	6.00794	5.79324	5.89709	5.9856	5.89188	6.21182	6.15694	5.62768	5.81523	5.63549	5.75493	6.03719	5.9196	5.7253	5.84521	5.79043	6.03923	5.91148	5.94259	6.17249	6.18095	6.01249	5.7691	5.75587	5.82169	5.99535	5.83701	6.18341	6.11114
2010011I20Rik	5.86226	5.76906	5.72799	5.72046	5.87933	5.8381	5.64735	5.83076	5.67638	5.76857	5.53172	5.77154	6.10868	5.79439	5.6435	5.63191	5.76418	5.86014	5.32047	5.77059	5.53973	5.49967	5.60525	5.52298	5.84354	5.85194	5.7921	5.82028	5.97954	6.07578	5.46424	5.59761	5.66058	5.90308	5.91132	6.02849	5.91346	5.97709	5.97165	5.71936	6.12334	5.78485	5.82311	6.21701	5.936	5.48965	5.48342	5.39004	5.75625
2010012O05Rik	6.69969	7.0598	6.99973	6.70188	7.02303	6.61227	6.90843	7.25497	7.56437	7.15331	7.26985	6.80697	6.36668	6.43471	6.55474	6.24696	6.33924	6.37484	6.96019	7.12974	7.45565	6.54702	7.20353	6.83373	6.91146	6.82077	7.50386	6.74584	6.85235	7.13178	7.41231	7.36187	6.7871	6.86987	7.32117	7.04463	6.43788	7.07889	6.43512	6.50998	6.74525	6.57057	7.08393	7.10943	6.96817	6.99406	7.0551	7.30519	7.15932
2010106G01Rik	9.51032	9.19673	9.3473	9.75874	8.54698	9.70068	9.72906	9.58263	9.78219	9.71036	9.61047	9.9242	9.2491	9.27654	9.49407	9.20378	9.39179	9.32551	9.72274	9.70222	9.69924	9.84306	9.95699	9.90155	9.81244	9.73047	9.41311	9.9231	9.65533	9.63112	10.0636	10.0466	10.0891	9.8783	10.0566	10.326	9.93042	9.61931	9.84278	9.36388	9.25665	9.2669	10.3617	10.4344	10.4225	10.5222	10.4533	10.4175	9.65326
2010107E04Rik	11.4876	11.9437	11.672	11.6467	11.7689	11.9587	11.0656	11.3851	11.1379	11.4214	11.2945	10.6278	11.3443	11.6366	11.4122	11.3942	11.6915	11.305	11.1972	11.3854	11.0167	10.9835	11.2375	11.1319	11.9543	11.9105	11.7947	11.6053	11.5765	11.6161	11.1347	11.53	10.9693	10.9383	11.3657	10.9066	11.5559	11.5263	11.0137	11.583	11.6497	11.0969	11.5422	11.1457	11.168	11.1569	11.3335	10.7225	11.992
2010107G23Rik	5.77099	5.67669	5.69792	5.5888	6.06989	6.02893	5.60381	5.66095	5.67189	5.62012	5.91189	5.46525	6.09566	6.45377	6.88055	7.18459	6.68476	6.53424	5.94136	5.79896	5.85491	5.85049	5.78131	5.50959	5.46589	5.57136	5.78332	5.81406	5.55728	5.6777	5.4927	5.47522	5.79405	5.74996	5.4739	5.73353	6.36373	6.34356	6.17144	6.10502	6.26763	6.45247	5.68705	5.53514	5.73961	6.01956	6.00335	5.91339	5.78168
2010107H07Rik	8.34315	8.15161	8.49539	8.46532	8.94521	8.44658	8.44857	8.79035	8.65028	8.69731	8.35139	8.22483	7.39102	7.92558	8.27236	7.59385	8.24108	8.51646	8.46391	8.67281	8.47733	7.89091	8.3907	8.45778	8.81423	8.40817	8.44211	8.75064	8.28775	8.2668	8.00637	8.44657	7.99946	8.15994	8.57006	8.19137	8.21135	8.24233	8.13174	8.13343	8.08787	8.14698	8.74239	8.50419	8.28024	8.19052	8.2154	8.16109	8.86135
2010109K11Rik	7.50617	7.51142	7.376	7.63278	7.69153	7.43925	7.27698	7.29312	7.28693	7.27701	7.17109	7.15742	7.09924	7.14989	7.01036	7.07616	7.32129	6.92776	7.03262	7.07416	6.6945	6.60375	7.03979	7.11171	7.4627	7.47771	7.28619	7.43614	7.24581	7.30986	6.99848	7.15855	7.04328	7.11245	7.06933	7.07971	7.39519	7.4215	7.23562	6.93093	7.14665	7.11845	7.01997	6.84176	7.03271	7.17664	7.47535	7.08765	7.49669
2010109K11Rik	9.31183	9.09138	9.15655	9.60922	8.80943	9.37943	9.39989	9.37825	9.45634	9.4099	9.63355	9.58831	9.64533	9.6624	9.51201	9.50688	9.52381	9.50933	9.31713	9.2249	9.40099	9.26952	9.42572	9.30234	8.96032	9.5021	9.38776	9.56288	8.91452	9.06079	9.50608	9.39614	9.19574	9.12216	9.34485	9.08158	9.76992	9.76036	9.7998	9.9011	9.69343	9.76089	9.42211	9.35677	9.43577	9.28468	9.62324	9.45902	9.57417
2010110P09Rik	4.96011	4.92018	5.07737	4.97456	5.05977	4.95825	4.89394	4.89311	4.95854	5.04633	5.01197	4.78019	4.82045	4.8401	4.88189	4.9745	4.89413	4.80782	5.11671	4.99157	4.96368	5.11925	5.20467	5.41268	4.90688	4.80836	5.03594	4.98706	4.85323	4.93532	4.8266	4.98776	4.82673	5.49178	5.19341	5.85989	4.85297	4.82554	4.85661	4.9148	4.88877	4.9069	7.1204	7.3441	7.60623	5.24628	5.25554	5.71568	5.00362
2010204K13Rik	7.01804	6.94678	6.83025	6.96733	6.92532	7.22081	7.60144	7.56801	7.64995	7.70417	7.6372	7.34601	7.20669	7.40489	7.43981	7.86444	7.84519	7.67626	8.65261	8.30832	8.61024	8.53332	7.98648	8.38094	7.15197	6.64676	6.66794	6.80687	7.10726	6.99048	7.95576	7.75722	7.69397	7.03165	7.20602	7.14129	7.08561	7.17166	7.24496	7.52816	7.61515	7.53688	7.53118	7.26787	7.83158	8.82796	8.90005	8.69487	7.11916
2010300C02Rik	5.32003	5.51041	5.32663	5.43676	5.6888	5.4274	5.42803	5.54869	5.3783	5.44171	5.34956	5.35174	5.69196	5.58795	5.51869	5.77753	5.60594	5.64818	5.75048	5.54152	5.48573	5.53309	5.63315	5.47343	5.40044	5.49637	5.7893	5.60166	5.50217	5.4799	5.32584	5.33305	5.32291	5.66879	5.29699	5.40552	5.65257	5.80405	5.63429	5.76949	6.01662	5.79738	5.70889	6.01952	5.85792	5.48572	5.40416	5.65419	5.52768
2010305A19Rik	6.61421	6.55816	6.77765	6.25183	6.37471	5.87531	6.46911	6.19021	6.44875	6.61163	7.36547	7.48392	8.20984	8.46793	8.63605	8.40897	9.01997	8.74276	6.69612	6.81034	6.5915	6.35437	6.70866	7.23898	6.88819	6.45075	6.23541	6.16388	6.71771	6.56311	6.36993	6.63226	6.97144	6.11968	6.78103	6.78627	8.80591	8.51273	8.49932	8.73171	8.76864	8.41284	6.77207	7.60047	6.94408	6.59765	6.16671	6.72764	6.4506
2010321M09Rik	7.55949	7.30308	6.90109	7.35645	7.22042	7.0835	7.68587	7.41913	7.79646	7.35333	7.8578	7.72457	7.44539	7.20204	7.51206	7.24931	7.66673	7.6464	7.02344	7.66328	7.326	7.28049	7.45295	7.40037	7.05559	6.51981	6.57675	6.96013	7.22449	7.25143	7.77299	7.47878	7.16658	7.74503	7.67214	7.54279	7.31505	7.40932	7.61264	7.41493	7.21233	7.40132	7.97501	7.87011	7.98896	7.28644	6.94296	7.23075	6.62292
2200001I15Rik	5.32636	5.33062	5.32652	5.21684	5.24041	5.44668	5.38318	5.33338	5.3206	5.34373	5.42179	5.33989	5.99617	6.52083	6.69137	6.15984	6.09205	6.36128	5.39816	5.39333	5.41321	5.46691	5.42074	5.29461	5.63349	5.47753	5.35232	5.43562	5.28176	5.41401	5.28511	5.43977	5.31712	5.32809	5.34306	5.36817	6.24124	6.48839	5.87658	5.8105	6.06744	5.93556	5.34151	5.36662	5.43829	5.35219	5.31085	5.30217	5.41118
2200002D01Rik	7.18471	7.32227	7.67196	7.34631	7.04835	7.94886	7.38968	7.65495	7.37695	7.51347	7.45601	7.30326	7.45626	7.32386	7.43835	7.35141	7.39813	7.39816	7.68128	7.52921	7.67925	7.66143	7.62573	7.67411	6.99669	7.51555	7.23999	7.28387	7.41065	7.09981	7.48464	7.50536	7.47263	7.5036	7.39535	7.30735	7.33587	7.10211	7.47958	7.32564	7.25771	7.1479	7.67365	7.37036	7.50618	7.913	7.37232	7.59127	7.45903
2200002J24Rik	5.06786	5.06119	5.22537	5.22258	5.43749	5.35877	5.27859	5.10223	5.1801	5.44539	5.43107	5.38513	5.08435	5.15906	5.17792	5.04936	5.1643	5.17405	5.92014	5.54739	5.57332	5.75086	5.39852	5.67126	5.11995	5.18622	5.34883	5.23101	5.41442	5.46111	5.37874	5.31441	5.26811	5.48482	5.53573	5.37555	5.08272	5.1264	5.22741	5.25233	5.2186	5.19115	5.71336	5.73417	5.53132	5.479	5.64614	5.37292	5.4611
2210009G21Rik	6.97219	7.10571	7.15443	7.44151	6.60293	6.91212	6.89721	6.32928	7.09232	6.89658	6.73826	6.61153	6.84971	6.9875	6.96853	6.84794	7.51163	7.02202	6.54908	7.20952	6.42184	6.41174	6.35059	6.29215	7.03953	7.01858	6.69475	6.79311	6.8626	6.93825	6.5786	6.92398	6.60909	6.50881	6.69991	6.87074	7.04766	6.8986	7.18363	7.19986	7.20266	7.36448	6.96424	6.92869	6.87725	6.73751	6.13811	6.45292	6.58522
2210010C17Rik	5.58457	5.61371	5.57466	5.58857	5.74814	5.6755	5.56159	5.5515	5.39521	5.53771	5.58587	5.40674	5.79898	5.84936	5.86491	5.59156	5.90876	5.99371	5.74805	5.67123	5.76804	5.77718	6.08356	5.89435	5.51432	5.61566	5.72776	5.56422	5.55156	5.78053	5.53401	5.58312	5.55183	5.63768	5.65606	5.46936	5.75327	5.60522	5.85563	5.65799	5.56557	5.72513	6.78	6.46608	6.08589	5.83105	5.91775	6.06861	5.78965
2210012G02Rik	6.46574	6.42673	6.31435	6.88331	8.02995	7.04868	7.04308	6.67338	7.47784	6.86986	6.90953	6.60122	5.98923	6.24243	6.61093	6.62596	6.35722	6.31241	6.47481	7.11042	6.63373	7.49584	7.12749	6.92639	6.27269	6.73774	6.64356	6.13475	6.30386	6.58739	7.45241	6.96709	6.5858	6.33878	6.57628	7.02534	6.05795	6.21679	6.36482	6.50743	6.30368	6.36469	6.5203	7.15745	6.37197	7.33953	7.29778	7.30736	7.26703
2210012G02Rik	6.96153	7.64682	7.19878	7.04266	7.47503	6.62715	6.96078	8.05117	8.67937	8.45402	8.20824	8.20801	7.86989	7.15255	6.38604	5.75151	6.13363	7.10777	7.16892	7.46501	8.64013	6.51774	7.04442	6.57255	7.22235	7.19225	6.863	7.76072	7.54622	7.63921	8.81405	8.40491	6.81153	7.71084	8.27541	8.57166	7.23726	7.62041	6.25458	6.30369	6.02724	5.39771	8.24318	6.7393	7.62099	8.80361	8.49554	8.76966	8.87293
2210016F16Rik	6.69546	7.0097	7.28082	6.97942	7.51196	6.62239	7.21532	7.27464	7.47033	7.38438	7.1451	7.26012	7.59684	7.25355	7.45394	7.23261	7.26981	7.33927	7.58211	7.38693	7.54519	7.93759	7.48641	7.57635	6.63314	6.81597	6.24781	6.86496	6.73526	6.84373	7.37735	7.53385	7.20707	6.96688	7.36777	6.99135	7.60116	7.5987	7.62486	7.16929	7.2314	7.12906	7.44964	7.75386	7.77418	7.46483	7.95334	7.9915	7.0192
2210018M11Rik	8.18174	7.72025	7.94804	8.17312	6.8775	7.90593	7.94331	7.73756	8.20053	7.93257	7.8409	7.8771	7.84696	7.77277	7.61256	7.99313	8.16403	8.15506	8.14132	8.06723	7.92797	7.62386	7.37422	7.65411	8.3839	7.92835	7.80027	7.89974	7.80593	7.86497	7.9145	7.93501	7.97249	7.79742	7.7233	8.26438	8.12217	7.94128	7.95588	8.21584	8.01589	8.08071	7.85257	7.56086	7.33374	7.83028	7.20645	7.85455	7.43899
2210023G05Rik	5.06026	5.09108	5.17937	5.06186	5.30864	5.19111	5.13123	5.12653	5.07737	5.03676	5.18359	5.07058	5.0914	5.08964	5.20563	5.14859	5.03891	5.0636	5.68052	5.95378	5.69792	5.26931	5.26902	5.18937	5.1866	5.12929	5.23477	5.35283	5.14846	5.14326	5.13041	5.23749	5.15233	5.09498	5.16099	5.20479	5.05942	5.09576	5.16372	5.12472	5.08134	5.14957	5.11117	5.04121	5.04354	5.2648	6.7723	5.74577	5.26914
2210403K04Rik	6.25783	5.98817	5.8374	5.83838	5.60444	5.39971	6.02105	5.69861	5.38971	5.87776	5.77091	5.76356	5.61692	5.91735	6.01508	5.68913	6.77125	6.22781	7.25467	6.32544	6.90298	7.8282	6.17788	6.08627	5.81819	5.23805	5.94468	5.88935	5.91015	5.82366	5.777	6.36624	5.50817	5.69081	5.94195	5.9487	5.53254	5.60722	5.47084	5.97259	5.93731	5.62562	6.94833	5.99924	6.73545	6.77034	6.56588	6.28842	6.03537
2210404J11Rik	7.47462	7.35261	7.01294	7.54267	6.72745	7.10442	7.48543	6.79661	7.54951	7.1644	7.47044	7.21994	7.45903	7.69617	7.40976	7.4911	7.8781	7.6568	7.21689	7.31591	7.00617	7.26488	6.95302	7.04968	7.32743	7.42567	7.20997	7.46838	7.27511	7.58763	7.10224	7.12756	6.98468	7.1613	7.10735	7.04879	7.5268	7.50383	7.70057	7.70836	7.88128	7.82256	7.34132	7.52842	6.78269	6.90207	7.45898	7.29601	7.72053
2210404J11Rik	5.40323	5.37122	5.38244	5.44279	5.28874	6.05897	5.18031	5.37192	5.18799	5.1692	5.21921	5.11938	5.51204	5.82229	7.90715	5.37141	6.64433	7.09973	5.26067	5.26785	5.46762	5.40772	5.26609	5.33951	5.55956	5.63089	5.99978	5.3474	5.39846	5.41551	5.30795	5.17344	5.21557	5.27106	5.90041	5.29748	6.50569	6.54979	5.99055	6.28331	7.00347	6.24303	5.46537	5.17818	5.17082	5.39579	5.34366	5.20886	7.40346
2210404O07Rik	6.6784	6.85436	6.91792	6.87912	6.89667	6.67354	6.40316	6.57835	6.46781	6.5696	6.5779	6.5182	6.43205	6.37419	6.25092	6.49216	6.38576	6.18632	7.12078	6.62542	6.59935	6.89044	6.57313	6.52382	6.61516	7.16829	6.81442	6.98722	6.58983	6.58587	6.62525	6.68549	6.5659	6.53428	6.4604	6.58737	6.39628	6.41735	6.31833	6.22991	6.39569	6.38114	6.50453	6.38011	6.52705	6.82277	6.64784	6.74542	6.94219
2210407C18Rik	5.03786	4.90642	4.82303	4.81443	4.9902	4.9421	6.5141	6.67877	6.43557	5.08859	5.63613	5.57308	4.86996	4.78352	4.93773	4.83325	4.97977	4.94318	8.2934	9.10228	8.72686	6.75394	8.13126	8.17504	4.97371	4.88991	4.79763	4.83841	4.81743	4.83127	6.00862	5.23947	5.32127	4.7982	4.82585	4.92541	4.84114	4.92077	4.89644	4.85337	4.92782	4.86202	4.84731	4.94098	4.73362	5.02792	5.20295	5.24091	4.924
2210408I21Rik	5.81277	5.70768	6.01506	5.93036	5.58233	6.09138	5.91017	5.63055	6.17835	5.94041	6.09811	6.1095	5.4315	5.553	5.57552	5.52618	5.8285	5.6825	6.41948	6.49727	6.09167	5.50725	6.29587	6.40985	6.07906	5.94733	5.72707	5.89327	5.94327	5.98691	6.05801	6.12322	6.36187	5.98489	5.93175	6.17978	5.4939	5.59649	5.33151	5.59271	5.47572	5.61204	6.09084	5.73327	5.6151	6.3885	6.39502	6.38782	5.79297
2300005B03Rik	5.91128	5.87248	5.73316	5.89156	5.83361	6.23615	5.99904	5.91697	5.86902	6.01743	5.72846	5.81054	5.93843	6.0033	6.00973	5.9037	6.05363	6.05292	5.86269	5.96098	6.0546	6.22486	5.81481	5.96821	6.04627	5.76436	6.011	6.28473	5.85285	6.03304	6.03156	5.65011	5.78547	5.75846	5.81375	5.71687	6.0904	5.98774	5.96264	6.02818	6.18445	5.90827	5.8871	5.88111	5.81927	5.89234	5.88932	5.89237	5.91219
2300009A05Rik	6.66858	6.97019	6.82512	6.71706	6.94979	6.82607	6.65035	6.64023	7.02006	6.84578	6.71712	6.58294	6.4773	6.56916	6.50821	6.46235	6.65349	6.51014	6.57329	7.01297	7.05494	6.80851	6.79625	6.87266	7.02933	7.18087	6.87035	6.87296	6.46282	6.72383	6.74128	6.64802	6.68066	6.54245	6.68599	6.86456	6.63477	6.55631	6.78707	6.71699	6.39106	6.48935	6.89867	6.59541	6.51687	6.75258	7.01964	6.69237	6.71493
2310001A20Rik	6.78933	6.96416	6.82883	6.84433	6.23661	6.78563	7.45498	6.99016	7.03271	6.69697	7.06244	7.29145	6.83236	6.6447	6.81754	6.72613	6.96249	6.91454	6.77591	6.66207	6.48986	6.66249	6.56057	6.75935	6.70646	6.67737	6.32454	6.82408	6.84541	6.84015	7.07787	6.8369	6.22028	7.07884	6.97921	7.09149	6.61968	6.53559	6.681	6.49148	6.78803	6.82482	6.93664	7.37015	7.80989	6.47938	6.29483	6.67456	6.6951
2310003C23Rik	8.56612	8.77404	8.77421	8.95324	9.76412	8.78146	9.22116	8.66156	9.03174	9.17777	9.28496	9.08071	9.63918	9.66284	9.38671	9.54155	9.44716	9.43625	9.11167	9.36693	9.58667	7.55566	8.93009	8.99772	8.88711	9.2113	9.11334	8.8831	8.8358	8.63445	8.91272	9.32025	8.257	8.95999	9.13094	9.00518	9.09506	9.22889	9.31899	9.45118	9.62469	9.5263	8.98134	8.92957	8.91529	9.05295	8.88224	8.69345	8.74506
2310003F16Rik	12.0685	12.0244	12.0968	11.9908	11.5284	11.9593	12.0178	12.1842	12.1842	12.2205	12.1823	11.9645	11.9336	12.0977	12.1023	11.987	12.0462	12.0112	12.0068	12.0241	12.0393	11.9036	12.0409	12.1384	12.0013	11.8259	11.9207	11.8981	12.0569	12.0941	12.1867	12.2502	12.1155	12.0135	12.1823	12.0341	11.9154	11.9907	11.9748	11.9797	11.9444	11.947	12.1328	12.0396	12.0426	12.052	12.1992	12.1255	11.7676
2310003H01Rik	5.99028	6.11475	6.16169	6.27486	6.08651	6.26174	5.98215	6.09712	5.90492	6.02679	6.10154	6.03656	6.01959	6.00419	5.97212	6.00963	5.95275	5.88924	6.02377	6.13276	6.0991	6.01721	6.0991	6.08001	6.15725	6.49193	6.37663	6.28037	5.92959	6.0303	5.94527	5.89048	5.90362	6.00291	6.02175	5.92392	6.14911	6.11392	5.86605	6.09544	5.97964	6.00184	6.10815	5.98132	5.97109	6.31461	6.19099	6.02583	6.33882
2310003L22Rik	8.53484	8.90172	8.90934	8.67593	7.92159	8.55952	8.74501	8.54112	9.16126	8.88344	8.63495	8.63675	9.19348	9.51606	9.67685	9.50191	9.38831	9.37719	7.95294	8.22815	8.02054	6.77576	8.37462	7.95831	8.29529	8.38145	8.3035	8.5736	8.73674	8.69204	8.57465	8.5759	8.51577	8.7125	8.9496	8.83787	9.91375	9.69716	9.66343	9.58008	9.41151	9.47009	7.98875	8.01527	8.36264	8.32399	8.94827	8.46729	8.31222
2310004I24Rik	8.0897	8.30316	8.24949	8.36785	7.03329	8.0604	8.13313	7.93006	8.58197	8.00717	8.01612	7.8922	8.85781	8.64396	9.18955	8.84514	8.95591	9.02266	6.43456	7.78606	8.06618	7.27377	7.28506	7.42265	8.2013	7.98791	7.72203	8.29723	8.15433	8.31617	8.3616	8.2441	7.61703	7.9334	7.8543	8.48074	8.6904	8.59784	8.8117	8.90548	8.92532	9.06353	7.68253	8.09199	6.72818	7.61719	8.42639	8.37812	8.03876
2310004N24Rik	6.22358	5.97944	6.23245	6.07396	6.36795	5.911	5.95173	5.69086	6.24577	5.81336	5.6732	5.65501	5.54215	6.00961	5.66494	5.69061	6.46019	6.05685	5.62426	5.99565	5.60217	5.5432	6.28754	5.39914	5.77153	6.44202	5.94207	5.8825	6.00008	5.98423	5.87719	5.84731	5.86893	6.03484	5.82006	5.89874	6.20386	6.1413	5.95975	5.89122	5.99069	5.8256	6.01729	5.90545	5.90799	5.51039	5.54979	5.89491	5.98664
2310008H04Rik	8.4085	8.34535	8.20902	8.31116	7.57321	7.7778	9.3537	9.5952	9.46461	9.03204	9.04741	9.92985	9.03094	8.98791	9.21441	8.93633	9.03005	9.17805	10.0768	10.152	10.3985	9.48944	9.7187	9.50453	8.60175	7.9005	7.93985	8.48502	8.2364	7.9285	9.58637	9.48546	9.24235	8.94122	8.81063	8.77689	9.27247	9.17848	9.14537	9.03987	9.18622	9.38016	8.62745	8.31136	8.67243	9.52024	9.62428	9.56648	7.95827
2310008H09Rik	9.04539	9.14295	9.23505	9.02325	8.79042	8.95973	9.09592	9.43527	9.34467	9.30657	9.21693	9.1748	9.37899	9.28258	9.49679	9.34365	9.35074	9.40458	9.50949	9.34486	9.419	9.29982	9.23337	9.51284	9.26764	9.35009	9.16022	9.02987	9.27034	9.29613	9.43516	9.48748	9.42649	9.36719	9.18589	9.35089	9.33913	9.19984	9.24769	9.49757	9.56934	9.624	9.1203	9.27922	9.22412	9.94281	10.0524	9.89386	9.25333
2310011J03Rik	5.91542	5.97304	5.75761	5.86083	6.45405	6.06928	5.7693	6.05923	6.02253	6.02418	6.27226	6.32884	6.12696	5.73859	6.01403	6.13724	5.88459	5.83386	6.18941	6.11569	5.95693	5.93758	6.1372	6.07038	5.70403	5.97731	5.96468	5.75462	5.91703	6.01334	5.95614	5.82108	6.02284	5.83902	6.00508	5.84911	5.85725	5.85409	5.82283	5.81432	5.86581	5.7533	6.03212	5.98852	6.08418	5.98217	5.86797	6.16368	6.12392
2310014H01Rik	5.78985	6.18601	6.02219	5.93151	5.67961	5.80836	5.40754	5.51847	5.74357	5.4679	5.66778	5.40293	6.13111	6.26518	6.50324	5.92717	5.89825	6.14682	5.72308	5.44253	5.68935	5.66968	5.49809	5.67334	6.20254	6.27497	5.68383	5.8734	5.68364	5.77691	5.49672	5.53942	5.59272	5.57468	5.53159	5.60536	5.81626	5.88116	6.28735	5.66689	5.90255	5.66	5.32078	5.30962	5.45414	5.37018	5.51554	5.66693	6.67378
2310015B20Rik	6.11098	5.97441	6.04232	5.94512	6.39967	6.39524	6.22636	5.80134	5.91731	6.0709	6.09761	5.88191	6.03697	6.20949	6.26816	5.93515	5.83481	5.89649	6.07633	6.83851	6.86905	6.18839	6.65637	6.06937	5.96433	6.25407	6.02311	5.99306	5.88518	6.18766	6.32186	5.78819	5.95109	6.26744	5.82106	5.92973	6.12021	5.93088	6.02362	6.13073	6.05068	5.96468	6.09768	6.18769	5.96457	6.08859	6.92966	6.98834	6.62024
2310016C08Rik	7.4576	7.48066	6.91937	7.54731	7.15262	6.99887	6.71785	6.73213	7.05592	6.91073	6.64585	7.00447	6.68751	7.08145	6.47713	6.5691	6.80295	6.74624	7.29158	7.09149	7.31086	6.67566	6.91935	6.97326	7.29186	6.70769	6.79882	7.32955	7.00586	6.97394	7.06862	7.33514	6.71521	6.47644	6.91694	7.11222	6.69221	6.83629	6.55669	7.1458	6.71228	6.65978	6.82906	7.1451	6.77636	7.38193	6.93892	7.26548	7.10629
2310016E02Rik	10.4634	10.8953	10.7796	10.9632	9.52938	11.1615	10.3546	10.7024	10.4142	10.4472	10.7358	10.7077	9.27707	10.092	10.0428	10.5481	10.619	9.89822	10.0617	10.0958	9.98925	9.7079	10.1824	10.6105	11.2092	10.8495	10.8269	10.7484	10.4434	10.6837	10.6083	10.5158	10.1768	9.85669	10.5972	10.3293	10.2213	9.52638	9.68161	10.0571	9.9128	9.6657	10.7179	10.7757	10.4023	10.3558	10.1852	10.1989	11.0641
2310016M24Rik	6.78253	7.17872	7.12103	7.15104	7.2342	7.01029	7.25475	7.4494	7.21039	7.27591	7.06115	7.05424	7.29707	7.4569	7.60412	7.1742	7.31749	7.26861	7.44653	7.40847	7.49466	7.27646	7.26834	7.24817	7.21297	7.27843	7.15696	6.87076	6.81296	6.97127	7.27272	7.29998	7.17871	7.07902	7.40773	7.13916	7.38613	7.53884	7.11635	6.98062	6.82793	6.76289	7.45505	7.4658	7.1638	7.30256	7.35619	7.33816	7.21023
2310021P13Rik	8.11555	8.23732	7.98669	8.19504	6.54397	7.83834	8.40012	8.66231	8.59134	8.30843	8.82472	9.00246	6.56949	6.73197	6.83754	6.61576	6.69937	6.52879	8.91968	8.75431	8.64839	8.64002	8.88043	9.13916	8.04262	7.96035	7.79883	8.26716	8.08031	8.23192	8.45466	8.46176	8.32637	8.56424	8.2833	8.28348	7.30062	7.44003	7.20237	7.44975	7.55909	7.38253	8.41635	8.75913	8.90953	8.941	8.59782	8.64875	8.13416
2310022B05Rik	6.31212	6.22606	6.26907	6.14509	6.29859	6.14699	6.34926	6.44833	6.37802	6.21986	6.52465	6.4971	5.9309	5.59596	5.94021	5.86608	5.99977	5.95199	6.09533	6.24824	6.02581	6.15104	6.07406	6.18812	6.39245	6.32388	6.23719	6.47901	6.3205	6.44528	6.29166	6.18524	6.37887	6.15475	6.36464	6.48016	5.95366	5.72326	6.06315	5.82722	5.85998	5.89114	6.12521	6.25276	6.01076	6.12393	5.95554	6.08495	6.20113
2310028O11Rik	11.656	11.923	11.6882	11.8974	11.9234	11.5587	11.4897	11.5643	11.6888	11.6385	11.5121	11.5348	11.6906	11.6968	11.7596	11.7568	11.6482	11.6655	11.4535	11.3236	11.5778	11.6998	11.5676	11.6282	11.9024	11.8326	11.6393	11.7096	11.6411	11.5309	11.3663	11.5071	11.1699	11.4864	11.5379	11.5166	11.8123	11.9572	11.7074	11.577	11.4872	11.537	11.6484	11.7613	11.7378	11.3776	11.5198	11.4123	11.7941
2310030G06Rik	5.40425	5.2147	5.21238	5.24299	5.33788	5.09253	5.77897	5.68492	5.54338	5.78372	5.5075	5.5806	6.06109	5.95558	5.8912	5.84913	6.53347	6.41819	5.84521	5.79218	6.30363	5.67856	5.89971	6.06611	5.19958	5.22786	5.34564	5.53085	5.29081	5.58681	5.7514	5.74006	5.38631	5.7541	5.70648	5.46318	5.9124	6.14022	6.15754	6.2603	6.83593	6.51762	5.8694	5.85083	5.87556	5.76997	5.75003	5.96688	5.37527
2310030N02Rik	6.45608	6.80752	6.73016	6.80947	7.84297	6.51783	6.39161	6.27139	6.50463	6.39836	6.43929	6.19596	7.94477	7.9971	8.13259	7.71218	7.78909	7.78758	6.00045	6.63212	6.32451	5.86065	6.16193	6.35992	6.51049	6.84744	6.55264	6.41346	6.33408	6.6863	6.10647	6.53562	6.56081	6.40333	6.52378	6.16346	8.35776	8.11356	8.17615	8.03101	8.51753	8.00019	5.88725	6.2991	6.18547	7.06263	6.34196	6.48256	6.49807
2310033P09Rik	7.34876	7.40599	7.54982	7.15949	7.14491	6.80352	7.90027	7.93544	8.05877	7.91911	7.92049	7.88107	7.0966	7.47542	7.88307	7.65178	7.57764	7.82251	8.64545	8.71564	8.85139	8.1662	8.38776	8.70647	7.18077	7.39181	6.67556	7.08072	7.83727	7.45878	7.6441	8.01538	7.79964	7.45323	7.69136	7.74164	7.54034	7.36853	7.04674	7.75153	7.49807	7.33584	8.00589	8.1397	7.98594	8.46776	8.17083	8.37429	7.22784
2310033P09Rik	6.91752	6.8779	7.15119	6.6472	6.76702	6.45555	7.04523	7.19973	7.09405	7.20602	7.01207	6.99589	6.84879	7.00083	7.15471	7.13411	7.09834	7.1157	7.45715	7.36505	7.55129	7.58352	7.29935	7.41344	6.90551	7.00572	6.8425	6.83457	6.99194	6.99666	7.39515	7.27986	6.951	6.87549	6.93965	7.06868	7.00771	7.00293	6.81386	7.05035	6.84992	6.91402	6.9989	7.35635	7.31596	7.46794	7.07172	7.31865	6.59547
2310034G01Rik	5.94763	5.92534	5.87446	5.79369	5.84768	6.22378	5.83734	5.78105	5.65009	5.7065	5.74783	5.71998	5.798	5.68856	5.72935	5.74656	5.78016	5.73605	5.94563	5.79633	5.91381	5.81578	5.8049	5.85615	5.82549	5.85999	6.04269	6.1694	5.76432	6.16381	5.89989	5.72312	5.73991	5.80572	5.72722	5.73071	5.78836	5.82511	5.70061	5.75723	5.70654	5.61611	5.88096	5.62894	5.79339	5.78147	5.81607	5.79235	5.95059
2310035C23Rik	8.66064	8.67036	8.48844	8.912	8.66416	9.2133	8.76248	8.69805	8.72431	8.37573	8.63472	8.62404	8.89856	9.12571	9.15726	9.19168	9.19501	9.32915	8.85451	8.94417	9.09736	8.02282	8.7106	8.70471	8.79449	9.02793	8.23936	8.66489	8.66255	8.91189	8.99766	8.68397	8.67729	8.63049	8.49686	8.77102	9.55613	9.53215	9.57292	9.48742	9.49699	9.59918	8.63964	8.74169	8.70547	8.73792	8.90621	8.83403	8.51284
2310035K24Rik	5.88213	5.96444	6.1235	6.16147	6.08833	6.00027	6.30064	5.94857	6.19878	6.21971	5.87463	6.36354	6.04768	5.99992	6.12525	6.02191	5.96344	6.09683	6.1718	6.4186	6.35811	6.11546	6.43344	6.32874	5.98833	6.14414	6.07279	6.01065	6.0447	6.04305	6.53632	6.16533	6.11618	6.07359	6.00156	6.07213	5.97992	6.14206	5.96814	5.95864	6.31979	6.04174	6.04223	6.08102	6.29016	6.55894	6.81377	6.60353	6.21818
2310036O22Rik	10.0883	10.1341	9.94322	10.1083	9.57834	9.7529	9.79658	9.97737	10.0983	10.006	9.83218	9.92356	9.88512	9.98858	10.1067	9.83313	9.91803	10.0354	9.73685	9.66821	9.7198	9.61218	9.86465	9.70503	10.0602	9.96021	9.95642	9.9165	9.92517	9.87874	9.75423	9.81404	9.99145	9.76452	9.90526	9.66729	9.7327	9.89647	9.70788	9.88825	9.84233	10.0093	9.80579	9.74625	9.94448	9.44283	9.86419	9.76187	10.1152
2310039D24Rik	4.9892	4.77945	4.87879	4.78561	4.96456	5.04097	5.36167	5.2899	5.67448	5.62687	5.29543	5.50209	4.82021	4.79165	4.85931	4.86266	4.81788	4.88868	7.93878	7.04424	8.53266	6.47828	6.68258	7.34646	4.99644	4.95061	5.19982	4.81873	4.89987	4.78677	6.13258	5.94029	6.13672	4.8308	4.76609	4.98344	4.80357	4.9166	4.88526	4.87147	4.66254	4.81336	4.79537	4.98146	4.884	7.39451	7.42487	7.42545	5.02774
2310039H08Rik	6.60895	6.82869	7.04773	6.82363	7.26445	7.22357	7.45418	7.22988	7.05089	7.7836	7.27905	6.84953	7.22922	6.96405	6.98506	6.86449	7.06673	6.72311	7.63213	7.26189	7.38304	7.53006	7.03197	7.29567	6.90112	7.36674	7.11542	7.15096	7.20364	6.98681	6.93923	7.52754	6.68479	7.09092	7.35277	6.79819	7.06899	7.10501	7.0004	6.76995	6.88587	6.82298	7.32742	7.26578	6.78194	7.33519	7.96459	7.54692	7.65821
2310040G07Rik	7.50317	7.93988	8.37256	7.31074	6.12833	9.07492	9.16839	8.8932	7.65749	8.0003	9.08818	8.62685	9.93647	9.30837	8.86314	9.39842	9.43582	9.33963	9.99411	8.86255	9.35478	11.0819	8.76032	8.04491	8.16978	7.36367	7.0796	8.14811	8.07273	7.07257	9.14723	8.76583	8.97884	8.59842	7.99344	8.91714	9.08062	8.2225	8.92681	9.177	9.06029	9.25413	8.48014	8.033	7.44098	9.41912	8.51283	9.22678	8.36993
2310044G17Rik	6.59566	6.36101	6.63332	6.67218	6.62677	6.54127	6.51912	6.56565	6.80178	6.67344	6.44713	6.62001	6.72031	6.73491	6.61816	6.51275	6.78216	6.86626	6.99421	7.0619	6.84557	6.75143	6.56942	6.61535	6.3762	6.60578	6.71225	6.63839	6.62707	6.42395	6.55239	6.56581	6.50778	6.65562	6.64135	6.60626	6.51214	6.47907	6.58194	6.88054	6.85329	6.74834	6.70502	6.64822	6.51275	6.75201	6.58023	6.70604	6.59105
2310044H10Rik	5.72082	5.93702	5.85307	5.94549	5.87486	6.21357	5.68169	5.90987	5.84099	5.79902	5.9808	6.05654	6.14981	5.94461	6.14701	6.01144	5.9483	5.76609	5.94126	5.78046	5.95722	6.07572	5.91504	5.89934	5.69947	6.02825	6.15011	6.10288	5.72821	5.91946	5.79721	5.8343	5.69016	5.69248	5.81036	5.83969	6.0188	5.95176	5.89778	5.88237	5.93982	5.7996	6.04315	6.26636	6.26965	5.83136	6.07144	5.74249	6.17943
2310047M10Rik	8.22669	8.32321	8.04167	8.29102	7.87769	7.9179	8.02455	8.18693	8.36166	8.19732	8.63971	8.34996	7.61999	7.3787	7.64211	7.40723	7.34667	7.33213	7.8611	8.67989	8.57434	7.92751	8.23111	7.86577	7.9707	8.08396	8.18971	8.00705	7.841	8.23837	7.87994	8.14828	8.0582	8.095	8.26341	8.07752	7.63469	8.14859	7.87818	7.64634	7.82472	7.70197	7.86741	8.0279	7.95419	8.08488	8.49666	8.20445	8.21236
2310047M10Rik	5.80614	5.77634	6.06073	5.95073	5.96174	6.01529	5.83385	5.78923	5.625	5.73305	5.70994	5.57297	5.69046	5.67389	5.80071	5.61434	5.71596	5.78387	5.88358	5.93534	6.03782	5.94072	5.98357	5.8969	5.68597	5.73144	6.02016	5.87255	5.87213	6.06791	5.78271	5.87884	5.68882	5.70779	5.76945	5.72748	5.74842	5.60352	5.61785	5.66762	5.67249	5.82749	5.84106	5.67354	5.54639	6.17013	6.00141	6.05649	5.76763
2310057J16Rik	5.53095	5.50283	5.51121	5.27872	5.52324	5.94631	6.27042	6.64049	5.81955	6.13395	6.0293	5.98583	7.41113	7.36839	7.12866	6.96625	7.39282	7.38354	7.90329	7.28394	7.51414	7.19985	7.67738	7.22326	5.92188	5.61965	5.64168	5.53601	5.56439	5.65306	6.22003	6.32108	6.19567	6.16749	6.1534	6.02118	7.47078	7.11731	6.94097	7.32165	7.62293	7.42528	7.49618	7.4971	7.7085	7.22154	7.72909	7.25508	5.56332
2310057M21Rik	7.90122	7.88637	7.5653	8.28265	6.90555	7.26336	8.00169	7.87628	7.91988	7.70782	8.05344	7.73429	8.75093	8.91822	8.691	8.45984	8.93637	8.61528	7.73517	7.56255	7.41814	7.70567	7.89765	7.36844	7.92765	7.69047	7.40129	7.51629	8.04458	7.79516	7.71394	7.9295	7.57097	8.02413	8.08237	8.51813	8.96263	8.80502	8.92836	9.05594	8.96814	8.90651	8.17975	8.29775	8.67678	7.33229	6.70441	7.87085	7.75845
2310061C15Rik	8.17854	8.29248	8.3486	8.25948	6.86985	7.68106	8.42015	8.79719	8.79817	8.89649	8.80797	8.60192	8.78341	8.92476	8.52946	8.64242	8.8292	8.68762	8.26843	8.1841	8.46039	8.48461	8.277	7.73116	7.84078	7.52011	8.32898	7.89416	8.36149	8.50756	8.06482	8.71863	8.38996	8.14976	8.69158	8.82237	8.68488	8.73061	8.45087	8.74235	8.96719	8.75877	8.89063	8.48105	8.91169	8.24918	8.54231	8.70965	7.65377
2310061I04Rik	8.26019	8.10548	8.33213	8.44002	6.97013	8.5194	8.29629	7.91256	8.13275	8.18335	7.58524	8.01486	9.72166	10.121	9.74953	9.89897	9.95129	9.86277	8.02368	8.29088	8.16119	8.28988	8.35752	8.1553	8.13478	7.975	8.13756	8.17743	8.12545	7.99138	7.3406	8.32209	8.0115	8.17533	7.68434	8.01066	10.3843	10.4568	10.0641	10.2607	10.4143	9.89676	8.10467	8.14079	8.35974	8.475	8.25021	8.16785	8.38224
2310061J03Rik	5.56463	5.64768	5.7646	5.53896	5.24876	5.58094	5.18114	5.94288	5.82223	5.65615	5.41861	5.27806	5.66966	5.72236	5.72209	5.61425	5.86611	5.87167	6.49496	6.16733	6.10068	5.43592	6.1587	6.18005	5.70598	5.83936	5.73018	5.55304	5.5202	5.65749	5.75903	5.68609	5.542	5.69706	5.37889	5.49521	5.93488	5.84472	5.73737	6.02349	6.07645	5.77343	5.6571	5.37634	5.44592	6.07243	5.91825	5.91582	5.8674
2310067B10Rik	6.64839	6.56797	6.84507	6.74865	6.50211	6.65048	6.39435	6.49707	6.4888	6.49251	6.55425	6.41059	6.54756	6.63413	6.51181	6.87553	6.70903	6.82113	6.53998	6.57641	6.51873	6.30588	6.4412	6.46162	6.43541	6.95452	6.94783	6.37659	6.60481	6.49112	6.54626	6.61259	6.65936	6.38345	6.44386	6.55342	6.83928	6.64398	6.56641	6.7869	6.81756	6.54812	6.37787	6.42842	6.56481	6.50774	6.46076	6.3601	6.80035
2310067E19Rik	9.74706	9.42513	10.3758	9.08415	6.99727	9.68145	9.97504	9.43078	9.50565	9.75473	8.99068	9.62402	5.81347	6.32272	6.12038	5.80963	6.77824	5.91959	9.03329	9.49048	9.59678	8.73638	8.57396	9.11596	9.31492	8.7955	9.37941	8.86998	9.20834	9.71159	9.07048	9.36491	10.0715	9.25171	8.53902	9.47688	6.01988	4.89833	7.08314	6.18504	5.80664	6.88364	8.12743	6.98276	7.24552	8.34195	9.34446	8.69645	8.39886
2310068J16Rik	6.9468	6.75001	6.7133	7.18513	6.7506	6.45875	6.76391	6.92328	6.59462	6.62435	6.75707	6.5638	6.80789	7.06862	6.77192	6.92463	6.85231	6.84992	6.86044	6.6777	6.60725	6.92405	6.85917	6.78467	7.1431	6.60276	6.95093	7.0001	6.66347	6.62377	6.41604	6.79485	6.51923	6.61547	6.59514	6.87424	6.92394	6.84803	6.76319	6.86289	6.99455	7.0878	6.81629	6.82819	6.97394	6.62265	6.60778	6.68761	6.7192
2310079F23Rik	5.54939	5.78809	5.75528	5.7485	5.67634	5.66825	5.80636	5.83317	5.78485	5.70814	5.77365	5.87005	5.76897	5.72012	5.73015	5.72789	5.70481	5.96993	5.66443	5.84337	5.94457	5.7176	5.89791	5.8671	5.85565	5.91993	5.84723	5.90479	5.67918	5.84533	6.08144	5.90274	6.15402	5.89129	5.76811	5.65197	5.82832	6.01905	5.98578	5.97622	5.95513	5.93413	5.74756	5.70685	6.01965	5.8218	5.63129	5.70403	6.07334
2310079N02Rik	6.49002	6.72544	6.60262	6.41189	6.38625	7.24536	6.49316	6.607	6.29493	6.65452	6.07882	5.95534	6.79862	7.19036	7.07179	7.5641	7.03898	7.42356	6.87996	6.57701	6.48938	6.35773	6.58483	6.33634	6.71224	6.79365	6.82419	6.46401	6.49041	6.40367	6.11546	6.46573	6.15793	6.14905	6.28539	5.94092	7.44808	7.10804	7.1169	7.08958	7.11483	6.93764	6.21669	6.43292	6.68684	6.80999	6.53971	6.6142	6.73054
2400001E08Rik	5.97869	6.19222	6.28509	6.38539	5.8582	6.2996	5.98538	6.37337	6.62678	6.18956	6.56541	5.40632	6.66159	6.61987	6.54154	6.69307	6.62296	6.38101	6.35002	6.07668	6.11325	6.18295	6.22358	5.99736	6.11793	6.18243	6.11198	6.33343	6.07485	6.61084	6.07727	5.93646	6.1614	5.62073	5.69918	5.61163	6.25068	6.4605	6.09476	6.61078	6.3144	6.40862	6.24967	6.38288	6.34208	6.12519	6.08855	5.99882	7.33636
2400003C14Rik	9.64631	9.79054	9.64724	9.73067	9.77432	8.95317	9.46344	9.67976	9.79568	9.74087	9.52638	9.77773	10.1685	10.383	10.2493	10.1627	10.3278	10.4662	9.69848	9.23091	9.32321	9.55182	9.5605	9.18259	9.74401	9.32449	9.31851	9.56937	9.90418	9.7027	9.518	10.0741	9.74172	9.57862	9.58865	9.88785	9.91094	10.2077	10.1087	9.90423	10.1948	10.0946	9.70297	9.51634	9.71999	9.91748	9.50086	9.6871	9.8204
2410001C21Rik	8.17052	8.13601	8.32288	8.23222	7.75483	8.02143	7.71484	7.77426	8.06621	7.9046	7.93388	7.41413	8.23113	8.36525	8.38249	8.1769	8.37039	8.66457	8.08708	7.99757	7.99775	7.66176	8.06767	7.95004	8.20997	8.12913	7.87192	7.94634	7.92728	8.13791	7.79477	7.76208	7.46065	7.47973	7.94868	8.05541	7.94436	7.94863	8.09456	8.21376	8.1146	8.24469	8.32347	8.63708	8.05231	7.70057	8.08652	8.03459	7.95961
2410002F23Rik	8.68481	8.85452	8.94359	8.61956	8.45465	8.84554	9.22663	9.0205	9.2522	9.03262	9.03946	8.87494	9.10195	9.07873	9.11114	9.49262	9.1946	9.28555	8.8935	8.90822	8.98851	8.7943	9.31013	9.21605	8.82167	8.56386	8.81133	8.87357	8.85017	8.84306	9.53028	9.32518	9.11973	9.32539	9.36779	9.13801	8.69004	8.77464	8.81014	8.98612	9.13713	9.08489	9.17341	9.39104	9.04548	9.0479	9.19209	9.07716	8.8572
2410002O22Rik	8.14672	8.67114	8.05672	8.68378	7.78644	8.15154	8.28108	8.12022	8.17431	8.37132	8.25658	8.57975	9.04156	8.72857	8.7909	9.05215	8.88186	8.85212	7.86983	7.58225	8.14337	7.41513	7.97266	8.08502	8.38421	8.79406	8.10951	8.4164	7.95242	8.16512	8.17559	8.39083	7.96988	7.86943	8.15603	8.6306	8.4293	8.65113	8.56565	9.03633	9.24616	9.09288	8.05099	8.63519	8.29795	7.71802	7.77275	8.17267	8.7201
2410003K15Rik	11.3586	11.4164	11.4279	11.28	11.4889	11.5091	11.6493	11.6192	11.7055	11.7712	11.5903	11.2547	11.9291	11.9803	11.9369	11.876	11.9019	11.8469	11.6939	11.5586	11.7513	11.7481	11.6212	11.5026	11.2841	11.202	11.3619	11.3684	11.4788	11.5958	11.5733	11.7396	11.4314	11.6117	11.6589	11.6234	12.0381	12.0221	12.0439	12.0318	12.0277	12.0927	11.5478	11.6094	11.5331	11.7232	11.6813	11.9221	11.4289
2410004B18Rik	7.19437	7.10271	6.77267	7.00484	6.95846	6.71349	6.69746	7.00169	7.211	6.83229	6.70692	6.86092	7.06219	7.07492	7.08824	6.78344	7.16352	6.98728	6.76136	6.7344	6.67201	6.39672	6.73287	6.43408	6.84555	6.41051	6.58395	6.88359	6.81199	6.7072	6.42631	6.85402	6.6565	6.79687	6.61732	6.75913	7.14399	6.89643	6.77709	6.9907	7.07584	7.02622	6.99781	7.02981	6.87842	6.81157	7.00644	6.57155	7.24136
2410012M07Rik	5.03846	5.03983	5.04062	4.91449	5.16883	5.02722	4.87187	5.091	4.84777	4.97018	4.97518	4.94622	6.47714	5.70487	5.67173	7.27013	5.8071	5.90965	5.07103	5.01158	4.91254	5.12327	5.1643	4.87775	5.15722	4.95095	5.08833	5.14749	4.96214	5.05124	4.81157	4.88472	4.88788	4.96101	5.13711	5.21082	5.33207	5.33295	5.48361	5.3805	5.68669	5.4548	5.05698	5.22707	5.27134	5.2773	5.20648	5.0794	5.18674
2410015M20Rik	9.15834	9.64607	9.64436	9.25749	9.52419	9.71349	9.65385	10.4056	10.2029	10.3088	10.0336	9.96355	9.75005	10.0385	10.2141	9.94259	10.2919	10.0339	10.5252	10.567	10.6356	10.4302	10.659	10.6328	9.55957	9.00827	9.94012	9.30214	9.7684	10.064	10.124	10.2156	10.1414	9.91224	10.1621	10.0486	9.72461	9.86192	9.64836	9.96032	10.0894	10.1312	10.0903	10.3542	10.4276	10.5291	10.9652	10.5216	9.86185
2410016O06Rik	9.73489	9.89709	9.89527	9.88206	9.71211	9.59777	9.54835	9.45028	9.90062	9.79295	9.79501	9.70424	9.99182	10.3021	10.3641	10.1279	10.2685	10.2174	9.49574	9.60153	9.93389	9.72518	9.99197	10.1806	9.44472	9.30966	9.27487	9.51034	9.362	9.62182	9.47754	9.70295	9.69247	9.382	9.52392	9.66683	10.2548	10.4187	10.2576	10.3596	10.2379	10.3707	9.43338	9.54619	9.58014	9.90472	10.0329	9.63479	9.89975
2410017P07Rik	6.93454	6.58173	6.3179	6.70583	6.42011	6.22719	6.76279	6.94747	6.90505	6.59687	6.06135	6.80691	6.84651	6.59255	6.84533	6.39056	6.75329	7.23398	7.05067	6.59923	6.73652	6.71898	6.42545	6.29052	6.47656	6.33187	6.26561	6.72339	6.39879	6.63075	6.71039	6.73768	6.67936	6.87053	6.67715	6.78589	6.52712	6.82667	6.68398	6.80144	6.56229	6.61133	7.17351	7.32632	7.27864	6.39447	6.6564	7.01184	6.48596
2410022L05Rik	8.33521	8.38112	8.34325	8.3759	7.99155	8.09948	8.49434	8.69039	8.93565	8.69525	8.72956	9.16254	9.61471	10.0218	10.1049	9.98532	9.90053	9.76533	8.23198	8.02461	7.96714	8.11835	8.52226	8.74734	8.29475	8.18865	8.34805	8.5291	8.42506	8.53089	8.50275	8.78743	8.9022	8.33919	8.43343	8.4204	10.2459	10.3533	10.1396	10.0778	10.2413	10.3379	8.32286	8.37141	8.1972	8.51194	8.84764	8.76474	8.30439
2410022M11Rik	6.78953	6.72576	6.68257	6.48378	7.09393	7.17253	6.69327	6.62861	6.69097	6.74584	6.35646	6.65489	6.67265	6.73453	6.67991	6.89528	6.76215	6.63566	7.35594	6.99085	7.0134	6.58086	6.72638	6.93002	6.60929	7.10523	6.87813	6.96089	6.16895	6.76094	6.81876	6.83897	6.44225	6.64112	6.53924	6.71525	6.56251	6.57068	6.36563	6.92139	6.67423	6.35757	6.69176	6.46338	6.68569	7.23594	7.2536	7.05028	6.67955
2410042D21Rik	9.4963	9.73712	9.59527	9.82513	9.38589	9.70953	8.67799	8.58767	8.94916	9.13255	8.798	9.1867	8.67228	8.77833	8.77524	8.8865	8.88285	8.96959	9.35063	8.89416	9.39292	10.14	9.21072	8.72787	9.64284	9.60876	9.88509	9.77452	9.90237	9.84564	9.1312	9.31877	9.18349	9.12686	9.45953	9.3734	8.32707	8.33441	8.58564	8.59074	8.6633	8.78255	9.5268	9.12091	9.20862	9.41051	9.11386	9.14659	10.1467
2410076I21Rik	5.84704	5.65485	5.6672	5.7028	5.42513	5.91586	5.58279	5.4773	5.30289	5.43506	5.23137	5.19988	6.55835	7.40937	7.39189	6.74287	6.83513	6.93906	5.54072	5.55021	5.45629	5.48209	5.55541	5.3898	5.39775	5.5506	5.83229	5.55635	5.64511	5.63866	5.52712	5.41127	5.50418	5.42752	5.41674	5.44728	7.34423	7.69921	7.70066	7.46112	7.25731	7.08708	5.5309	5.30071	5.43955	5.40445	5.48932	5.25139	5.58847
2410089E03Rik	7.06113	6.71144	6.86529	6.96263	6.98751	7.08325	7.56502	7.00304	7.40722	7.2323	7.1764	7.87037	7.92189	7.69773	7.81251	7.53721	7.82722	7.82851	7.58335	7.09782	7.35963	6.85792	7.31143	7.45542	7.00213	7.07126	7.11348	7.57536	6.92914	6.85017	7.58338	7.10756	7.5033	7.13825	7.46118	7.29027	8.59315	8.50348	8.62472	7.91565	8.07118	8.03255	7.06692	7.07572	7.04137	7.31157	7.47694	7.60933	6.75862
2410089E03Rik	7.40409	7.45719	7.10775	7.40575	7.61348	7.32971	7.92492	6.87095	7.34907	7.4403	7.49261	7.66956	8.26579	8.58712	8.45691	8.7725	8.54025	8.87028	7.56764	8.06474	7.63103	6.88605	7.39238	7.62726	7.40024	7.4268	6.65411	7.50114	7.28035	7.13008	8.0458	7.46264	7.6852	7.32581	7.94202	7.76413	9.14193	9.24459	9.3513	8.86654	8.55518	8.81547	6.9859	6.67035	7.43165	7.80349	7.38423	7.77792	6.73454
2410091C18Rik	7.53274	7.6831	7.76264	7.68665	7.52605	6.95356	8.17291	7.95659	8.18087	7.87922	7.94438	7.8626	7.67542	7.76312	7.79435	7.43305	7.95897	7.76123	8.10176	8.23629	8.17419	8.41658	8.13468	8.3899	7.4131	7.48926	7.5798	7.50289	7.52286	7.60853	8.39512	8.21468	8.01208	7.99075	8.06175	7.97745	8.13477	7.87289	8.2131	8.02616	7.93976	7.88216	7.99938	8.35165	8.26903	8.03405	8.49263	8.25279	7.35172
2410129H14Rik	8.44881	8.45074	8.00566	8.31603	7.86637	8.67692	8.1556	8.29017	8.50636	8.12737	7.63528	8.44235	8.516	8.34491	8.59085	8.28833	8.40908	8.63292	7.5817	7.76324	8.12711	7.8951	8.13593	8.10112	8.17654	8.22953	8.76971	8.46073	8.42965	8.50456	8.65484	8.19935	8.06631	7.99461	8.23393	8.56302	8.37894	8.44405	8.22781	8.01028	8.30055	8.45712	7.81118	7.87717	7.90144	7.62506	7.81419	7.80992	8.13383
2500003M10Rik	7.73062	8.03023	7.85223	7.69126	7.48156	7.80925	8.02393	8.04499	8.12529	7.99868	8.08784	8.19346	8.39968	8.3937	8.38785	8.18517	8.33456	8.2258	7.74638	7.67665	7.58447	7.41479	7.82826	7.96146	7.71422	7.26554	7.08841	7.64857	7.78753	7.77489	7.88272	7.91653	8.04337	8.08722	8.24516	8.08925	8.21462	8.32345	8.3299	8.19268	8.35437	8.45624	7.85208	8.0949	7.91013	7.5579	7.95514	7.63649	7.95492
2510003E04Rik	7.87413	7.94435	7.76495	8.04996	8.54475	8.30588	8.1515	8.59842	8.20448	7.9598	7.99027	7.91047	8.0254	8.32997	8.07873	8.0685	8.46628	8.36105	8.0415	7.92104	8.11194	8.65343	7.86695	7.96673	8.03398	8.11674	7.80239	7.62713	8.00343	7.81769	7.88653	8.12527	7.72628	7.28102	7.8221	7.96753	8.16121	8.37013	8.16361	8.42799	8.58036	8.51421	7.79668	7.87441	7.91738	7.92154	7.39184	8.04262	8.28727
2510006D16Rik	9.04617	9.36453	9.09012	9.25231	9.8951	8.80343	9.10368	9.11159	9.07307	9.17755	9.05469	9.23185	9.16108	9.07508	9.1793	9.36689	9.10928	8.94998	9.41219	9.20874	9.08999	9.75792	9.36808	9.40356	9.23881	8.78183	8.7446	9.0263	9.25232	9.11718	9.00704	9.03689	9.27327	8.54106	8.96473	9.38563	8.34828	8.303	8.16441	8.71425	9.1475	8.77768	9.21743	9.37876	9.06021	9.29395	9.15767	9.27381	9.34868
2510009E07Rik	6.27372	6.27362	6.26544	6.2696	5.8924	6.42814	5.91045	5.85765	5.7864	6.11244	5.80519	5.81392	5.61771	5.58629	5.68653	5.62165	5.62057	5.68756	5.93087	5.91514	6.05864	5.8871	5.94281	6.03617	6.44579	6.32628	6.72381	6.05712	5.96401	5.97795	6.18524	6.20905	5.8542	6.01216	6.10885	5.75562	5.86971	5.71471	5.66233	5.65517	5.61832	5.73495	5.97783	5.68338	5.65252	6.3814	6.01018	6.10642	6.2894
2510012J08Rik	6.63723	6.77437	6.67466	6.70281	7.21421	6.73674	6.50957	6.61253	6.60723	6.61125	6.62003	6.44872	6.93109	6.98567	6.89611	6.95382	6.88784	7.17204	6.74558	6.84219	6.7705	6.74239	6.57643	6.61455	6.45556	6.7937	6.86633	6.80705	6.61414	6.70443	6.48358	6.57447	6.65123	6.66415	6.62112	6.64181	6.71681	7.16523	7.0173	6.82458	6.93819	7.15535	6.38734	6.69022	6.27355	6.54279	6.60615	6.50328	6.23068
2510039O18Rik	8.03724	7.99839	8.01678	7.98035	8.07822	7.96297	7.67363	7.59196	7.45546	7.65152	7.50791	7.36912	7.83083	7.97629	7.93568	8.02087	8.09634	7.88241	7.52543	7.49061	7.822	7.68783	7.79328	7.81218	7.99166	8.09118	7.80238	7.83541	7.85227	7.93111	7.68291	7.73635	7.63219	7.69896	7.70997	7.57409	8.17847	8.29327	8.19403	8.33377	8.15146	8.08563	8.14971	7.95859	8.05266	7.76259	7.83785	7.62002	8.08579
2610001J05Rik	9.60076	9.36083	9.55353	9.37771	9.51347	9.20351	9.35478	9.48093	9.39844	9.55011	9.33593	9.2982	9.31607	8.93432	8.89552	8.78391	9.23361	9.16075	9.87154	9.74747	9.52919	9.33317	9.21956	9.28816	9.32024	9.18572	8.98993	9.3399	9.44055	9.51164	9.08962	9.42279	9.34619	9.13199	9.52096	9.46761	8.64205	8.52035	8.3177	8.99551	9.17924	8.66963	9.37115	9.23136	8.9045	9.38891	9.41881	9.4808	9.87488
2610002D18Rik	7.13021	7.16204	7.48935	7.1965	7.59111	6.66716	7.52308	8.24051	8.15383	8.5419	9.11755	8.23708	9.69743	9.1174	9.24655	9.16853	9.49957	9.36779	7.70568	7.06595	7.10129	8.96612	9.0148	9.03507	6.84869	6.2824	7.15103	7.70205	6.9714	7.45344	7.80115	7.79852	7.05576	8.27241	8.18013	8.6598	9.08322	9.29294	9.09569	9.17584	9.15197	9.22108	9.48907	9.7067	9.51738	7.02713	6.57162	7.08829	7.01056
2610002I17Rik	5.847	5.78459	5.77152	5.59447	6.12785	6.00466	5.79051	5.95859	5.72638	5.74796	6.1186	5.74817	5.84992	5.76642	6.17263	6.1864	5.87067	5.8413	5.78039	5.65024	5.62317	6.1296	5.65974	5.76457	5.60904	5.69277	5.60069	5.92577	5.70694	5.74283	5.67219	5.43231	5.7513	5.72798	5.52991	5.68495	6.02397	5.8168	5.66814	5.89464	5.672	5.78931	5.8998	6.18246	6.33346	5.7415	5.5462	5.6184	5.52529
2610002J02Rik	6.99395	7.00409	6.97334	7.01552	7.17954	7.29423	7.11817	7.20896	7.14005	7.1089	6.96635	7.03784	6.94381	6.92111	6.68525	6.94092	6.82435	6.97403	6.95335	7.21945	7.22516	6.87672	6.96778	6.91866	7.00302	7.2188	7.15052	7.07245	6.87939	7.00044	6.9088	7.26561	7.09322	6.8855	6.9889	7.07528	6.70199	6.35162	6.51287	7.0728	7.10014	6.67029	6.91229	7.10789	7.01586	7.64676	7.41588	7.32499	7.09334
2610002M06Rik	6.8501	7.01145	6.54221	6.98403	6.86215	6.51147	6.65057	6.67285	6.78607	5.89389	6.36043	6.99091	6.61293	6.87246	7.21511	6.9154	7.5443	7.59786	6.94895	6.08416	6.12136	7.18718	7.15331	6.39977	6.77636	6.34678	6.63365	6.76077	6.81849	6.85799	6.9455	6.64508	6.05893	6.41283	7.32515	6.38648	7.52624	6.75589	7.26655	6.9896	7.06108	6.58577	7.05658	7.0644	7.36486	6.52034	6.38699	7.25859	6.18433
2610008E11Rik	8.83267	8.90134	8.7114	8.83677	8.48069	8.59186	9.62672	9.15865	9.49366	9.40838	9.58653	9.5774	6.80992	6.24825	6.4337	6.63105	7.20251	6.58274	9.47367	9.73284	9.82622	8.76992	9.24723	8.89071	8.79614	8.47577	8.6475	8.95057	8.36064	8.59811	9.74379	9.83621	9.38989	9.26853	9.0109	9.67079	6.1329	6.19694	6.95095	6.24653	6.3989	6.18874	8.70306	8.15581	8.3511	9.48773	9.57937	9.82146	9.36782
2610015P09Rik	7.53031	6.97012	7.38293	7.287	5.45732	6.58208	7.49804	7.526	8.43023	7.10629	7.28895	7.21226	8.86096	9.45249	9.48925	9.40462	9.78023	9.40162	7.30033	6.75435	7.48386	7.21026	7.22849	7.44521	6.7707	6.49786	6.86726	6.50005	6.99221	6.83125	7.4508	7.09264	6.94454	7.48281	7.5946	7.6242	9.54689	9.28151	9.34299	9.73646	9.90485	9.90299	7.64264	7.84576	7.76109	7.89394	8.44503	7.70412	6.37031
2610018G03Rik	5.43791	5.98004	5.9515	5.82902	5.8004	6.06858	9.34245	8.96815	8.93689	8.27733	8.72106	8.62564	5.71516	5.37431	5.76133	5.96452	6.03767	5.88691	7.29944	6.76882	7.54986	6.25984	7.42036	8.15972	6.16148	5.73913	5.83816	6.24532	5.55295	5.7555	9.27213	8.58697	8.34343	7.68347	8.03709	7.55042	6.10984	5.97853	6.1745	5.26244	5.72835	5.86614	6.31529	6.38655	6.33605	7.32671	6.97482	7.05864	5.81426
2610019F03Rik	5.77045	5.88695	5.78412	5.92796	5.81316	5.72167	6.38405	5.8461	5.83645	6.1173	5.99537	6.25479	6.34904	6.21201	6.12472	6.05769	6.07563	6.44037	7.29203	6.57216	6.66814	6.27031	6.43218	6.18536	6.03293	5.89055	5.65812	5.9354	6.0705	5.93096	6.48508	6.69293	6.31945	6.04745	5.8149	5.86337	6.77707	6.86047	6.85725	6.29005	6.70721	6.74192	6.38673	6.30432	6.43109	6.88726	7.01054	7.43495	6.40603
2610020H08Rik	7.44944	7.55188	7.29392	7.71631	6.99299	7.4647	7.89894	7.85144	7.59283	7.8103	7.01093	7.29247	7.73446	7.6521	7.13059	7.37612	7.46935	7.24829	7.83253	7.35043	7.82866	7.91114	8.3148	8.1626	7.49829	7.24549	7.03322	7.00642	7.51783	7.24166	7.73088	7.69619	7.37992	7.71756	7.68992	7.73406	8.16817	7.94262	8.02979	7.56418	7.50924	7.43449	8.83058	8.80803	8.30992	8.08788	6.85974	7.79011	7.57466
2610021K21Rik	5.86823	5.6836	6.04542	5.80928	5.50384	6.10741	6.58743	6.01295	6.97208	6.2051	6.21839	5.88982	6.5959	7.04426	7.29338	7.32562	7.47956	6.97245	5.40929	5.19498	5.88496	5.40733	5.78675	5.84108	5.63991	5.67711	6.12076	5.68544	5.70001	5.92776	6.03247	6.17021	6.35188	6.24557	6.88073	6.49988	6.5147	7.31194	6.01958	6.95846	6.91971	7.64636	6.56557	6.51947	6.91651	5.68443	5.41857	5.3318	5.53479
2610024G14Rik	8.55137	8.51596	8.23076	8.56537	8.03232	7.50906	8.26538	8.29528	8.90569	8.81833	8.63122	8.77935	9.20682	9.21871	9.54	9.30382	9.17995	9.1779	8.89503	8.77938	8.28787	8.86654	8.96977	8.92739	8.3029	7.46561	7.10184	8.33053	8.52066	8.62116	8.57452	8.45485	8.82069	8.66696	8.65389	8.91922	9.69682	9.71225	9.36641	9.54571	9.55917	9.4832	8.2888	8.66297	8.4656	8.0583	8.42999	8.72699	7.92586
2610027L16Rik	7.19987	7.35964	7.17896	7.16352	7.10767	7.21363	7.59235	7.61478	7.5182	7.42587	7.80781	7.69063	7.95563	8.16494	8.30042	8.02219	8.26231	8.19868	7.25173	7.28777	7.19362	7.39591	7.48504	7.36928	7.08569	7.1127	7.04029	7.15775	7.32781	7.40687	7.50409	7.27035	7.25604	7.24709	7.3632	7.47952	7.88449	8.22941	8.10303	8.16544	8.15936	8.43286	7.17179	7.2897	7.21323	7.1191	7.16804	7.43009	7.35336
2610028A01Rik	9.83598	9.89276	10.0882	9.75006	10.0694	10.1337	9.57431	9.03404	10.0418	9.78736	9.49644	9.09132	9.57884	10.0786	9.9922	9.75393	10.0848	10.0417	7.77803	7.55799	8.6963	9.00589	9.15605	8.69297	9.80195	9.67739	9.45463	9.19995	9.79967	9.96276	9.03461	9.47975	8.76202	8.65374	9.10308	9.20395	9.92028	9.70699	9.91625	9.87183	9.85498	9.73838	9.27715	9.19114	8.59875	9.09465	9.07505	8.42578	8.96841
2610029G23Rik	7.32474	7.58123	7.4452	7.04165	7.22906	7.28245	7.39135	7.1036	7.46373	7.21637	6.98606	6.91895	8.526	8.49997	8.3112	7.78662	8.11888	7.76826	6.48154	6.76119	6.39466	6.65113	7.39349	7.11917	7.1516	7.43849	7.24818	7.04201	7.1083	7.00338	7.1059	7.42812	8.14794	6.85228	6.86481	7.15743	8.12765	8.36671	7.86996	8.15725	7.70352	7.60721	7.1453	6.76961	6.84002	6.84852	6.81227	6.5534	6.91557
2610029I01Rik	9.13378	9.17554	9.02191	9.50683	8.73525	8.7807	8.35128	8.28838	8.8914	8.28935	7.76236	8.07709	6.66219	6.19016	6.02717	6.76942	6.92091	5.98393	7.65966	7.32145	8.52252	8.52761	8.16965	7.68918	8.44813	8.38564	8.71654	8.44568	8.87642	8.84572	7.97341	8.60435	7.81056	7.58165	8.23707	8.4025	6.1463	6.30514	6.57466	6.41797	5.60348	6.07862	8.14142	8.47966	7.50722	8.15415	7.89831	9.30851	8.41354
2610034B18Rik	6.31313	6.71684	7.14823	6.43657	6.81361	5.77125	5.82254	5.61791	5.82799	6.26315	5.7124	6.07378	5.30253	5.39688	5.52891	5.27796	5.30873	5.55413	5.61923	5.72435	5.32111	5.6975	5.74005	5.64755	5.97359	6.45807	5.97963	5.8298	6.409	6.62761	5.77447	5.81571	5.92105	5.80901	5.87302	6.30846	5.50727	5.43208	5.49483	5.33386	5.5794	5.77808	5.56713	5.65418	5.66353	5.76517	5.71095	5.89386	6.27032
2610036D13Rik	6.77038	6.41388	6.4218	6.72396	6.2686	6.54653	6.78052	6.51563	6.83046	6.86307	7.02963	7.00052	7.3248	7.5485	7.56183	7.14158	7.62004	7.70301	7.4764	7.46835	7.38989	7.63021	7.3153	6.89969	6.55044	6.75232	7.0803	6.48045	6.76172	6.63851	7.07227	6.64878	6.85701	7.30372	6.6625	7.02296	7.88669	7.99673	7.83077	7.89032	7.96996	7.84015	7.13638	7.02042	7.03036	7.89971	7.87894	7.15642	6.66056
2610036L11Rik	8.65337	8.93035	8.76117	9.10043	10.3058	8.68002	8.2758	8.42037	8.57702	8.66974	8.11738	8.36238	9.82414	10.424	10.0789	10.0069	10.1337	9.83833	7.13841	6.92997	7.35022	7.61242	7.44631	7.39892	8.92104	8.18088	8.6722	7.95163	8.45681	8.03738	7.75227	8.49464	8.09775	7.68844	9.06545	8.19004	10.0883	10.0935	9.5908	10.0247	9.76536	9.30831	8.69857	8.63877	7.4462	5.97572	7.57866	6.66936	8.49607
2610039C10Rik	7.04835	7.4363	7.07376	7.67443	8.49778	6.77039	6.72831	7.01401	7.03297	7.05909	7.46823	7.00538	7.82317	7.63752	7.41787	7.15789	7.55329	7.78419	6.45294	6.36748	6.2423	5.99152	6.56858	6.37376	7.23121	7.01145	6.52922	7.0785	6.93458	7.06174	6.6713	7.01567	7.1486	6.76948	6.87069	7.08823	8.27408	7.55767	7.46036	7.34618	7.83827	7.26163	6.73281	7.1264	6.84351	6.28719	6.3153	6.30913	7.28086
2610044O15Rik	8.34105	8.36899	7.49063	8.5608	8.61313	7.75577	9.08042	9.12309	9.05438	8.87055	8.26192	8.71365	8.87756	8.92954	8.38979	8.42039	8.3768	8.56279	8.37065	8.20582	8.31637	7.89437	8.76367	8.84479	8.51926	7.90092	8.46514	8.41345	8.26564	8.19328	8.9516	8.85394	8.75294	8.50123	8.95728	8.94079	8.33469	7.95302	8.15261	8.40169	8.79339	8.75494	8.28513	8.36057	8.53526	8.58365	8.83172	9.10151	9.20094
2610101N10Rik	11.095	10.9189	10.8904	11.1424	10.3389	10.6038	11.2617	11.2412	11.1595	11.2576	11.116	11.285	11.2999	11.2844	11.3143	11.4529	11.2711	11.4291	11.1832	11.1019	11.1603	10.9166	11.2094	11.2203	10.9933	10.7868	11.0343	11.0949	11.0284	10.9721	11.169	11.2422	11.0914	11.1085	11.2715	11.3288	11.5011	11.2803	11.2942	11.4668	11.5137	11.584	11.0997	11.0214	11.1952	11.1774	10.9683	11.3247	10.3969
2610110G12Rik	6.93357	6.90928	7.07436	6.87581	6.87912	6.60017	7.73815	7.49534	7.46156	7.52034	7.89673	7.3054	6.65449	6.91297	6.80807	7.06829	6.94963	7.16216	7.66058	7.42378	7.45241	6.81559	7.57703	7.56372	7.08166	7.04492	6.7258	7.40563	7.13254	7.10539	8.43545	8.00601	7.5083	7.21377	7.3418	7.53073	6.87639	7.22128	6.62271	6.75505	7.0076	6.72843	7.72156	7.38336	7.39738	7.8929	6.95932	7.91652	7.47564
2610203C20Rik	6.25544	6.66981	5.99543	6.46536	6.4664	6.74766	9.70795	9.9961	9.87708	10.1752	9.76762	9.07941	6.23538	6.29724	6.3211	6.24708	5.8856	5.90478	9.60417	9.52924	9.35136	9.26667	9.25278	9.5093	7.04527	6.80223	6.25673	6.41075	6.46663	6.52834	10.2581	10.6302	10.2752	9.54754	9.71504	9.47247	5.91786	6.23041	6.31492	6.03318	6.08598	5.81774	8.52418	7.41961	7.28997	10.4945	10.0061	10.1626	6.40607
2610301B20Rik	8.39622	8.31511	8.23108	8.58292	7.62082	8.03631	8.50194	8.34611	8.98987	8.61897	8.75238	8.66585	7.95694	7.43206	8.13274	7.6362	7.84799	7.78465	9.39353	8.82646	8.95746	8.98326	8.95776	9.39343	8.5743	8.22791	8.21019	8.27366	7.86105	8.07488	8.55701	8.44539	8.51412	8.10308	8.14867	8.68221	7.42039	7.6539	7.08276	7.34113	7.15332	7.70453	8.60983	9.14116	8.58264	8.64954	8.87845	8.64273	8.54742
2610301G19Rik	7.16513	7.17474	7.17317	7.33563	7.21826	7.11708	7.05218	7.15372	7.30113	7.23202	7.12583	7.42203	6.82017	6.95047	7.08016	7.01947	7.04179	6.92717	6.98683	6.80851	6.872	7.13023	6.93429	6.68393	7.17393	7.29212	7.0834	7.19624	7.26157	7.31561	6.9779	7.27294	7.29105	7.07891	7.31866	7.26053	6.78449	6.76538	6.89145	7.02023	7.13311	7.12909	7.19523	7.04614	7.23604	6.8977	7.0398	6.9867	7.50068
2610305D13Rik	5.87749	6.1004	5.71839	5.97677	6.56952	5.94262	5.16624	5.05232	5.17354	5.14306	5.16614	5.13601	6.83672	7.13482	7.38496	7.51091	7.09493	7.25593	5.25678	5.30859	5.1413	5.28097	5.35974	5.43392	6.24194	6.09455	6.0746	5.61216	5.95617	5.95207	5.30847	5.85825	5.45394	5.1357	5.30291	5.18059	6.92703	6.27439	6.49167	7.29817	6.4424	6.68256	5.38909	5.52089	5.41841	5.2331	5.18273	5.11937	6.02376
2610318M16Rik	6.00974	6.19073	6.11153	5.90659	6.31681	6.08327	6.03754	6.09508	6.01143	6.05618	6.05424	6.00704	5.98987	6.0479	6.04308	6.01463	5.94696	5.97678	6.13485	6.05548	6.07177	6.21684	6.09885	6.03349	6.03386	6.05394	6.11211	6.23712	5.99905	6.13028	5.91719	6.08232	6.02576	5.99592	5.94303	5.98326	5.96605	6.01952	5.93544	6.14688	5.99103	6.01678	6.06655	6.05787	6.00191	6.04106	6.19718	5.90783	5.98683
2610318N02Rik	6.42316	6.93211	6.57152	6.22985	6.18791	6.44523	7.31635	7.11264	6.40447	6.81562	5.9424	7.50601	6.42043	6.38205	7.48456	5.9036	6.73998	7.14272	5.53023	5.31905	5.12743	5.80469	5.50153	6.34429	6.54662	5.94531	6.01146	5.93727	6.25081	5.89483	5.98501	6.72798	5.84796	5.85857	6.46911	6.98066	6.26807	5.57667	5.47386	5.446	5.7692	5.4439	6.38574	7.2077	6.69884	5.38899	6.02117	4.95984	6.3924
2610507B11Rik	9.57184	9.56186	9.48218	9.59478	9.39529	9.51296	9.38793	9.04449	9.25105	9.20636	9.62875	9.63071	10.167	10.1084	10.2968	10.2391	10.1253	10.2296	9.42766	9.45579	9.52422	9.66411	9.62564	9.61389	9.49628	9.50136	9.1116	9.54594	9.75653	9.6865	9.62301	9.47703	9.59612	9.45103	9.46974	9.63464	10.0954	10.261	10.3538	10.2782	10.3442	10.429	9.68752	9.71766	9.88767	9.65387	9.6159	9.55633	9.57169
2610524H06Rik	9.45737	9.31748	9.40811	9.51076	10.4314	10.1659	10.2416	10.6256	10.6854	10.3431	10.2983	9.75985	10.5128	10.7265	10.7314	10.3543	10.4888	10.2823	10.5352	10.7512	10.6548	10.5233	10.3892	10.6571	9.5911	9.86112	9.10118	9.26993	9.5197	9.41153	10.1326	10.2652	10.0476	9.84293	10.0324	10.1592	10.8453	10.9313	10.7334	10.365	10.7165	10.3069	8.73499	9.43049	9.56567	10.6518	11.1457	10.4886	9.92869
2610528A11Rik	5.83004	5.95562	5.8145	5.83524	6.00696	5.79017	5.83417	5.89732	5.8425	5.89979	5.82622	5.79529	5.84266	5.82427	5.90388	5.86078	5.83829	5.97843	6.1234	5.95595	6.03788	6.01093	5.8805	5.82668	5.89213	5.83157	5.92058	6.01308	5.92172	6.11012	5.72986	5.85591	5.7805	5.95914	5.77989	5.83149	5.93206	5.72723	5.77807	5.97582	5.92284	5.86967	5.74153	5.80429	5.89278	5.9579	5.96962	5.91779	5.88142
2610528E23Rik	7.82041	7.99703	8.09212	7.99587	5.85538	6.7318	7.85047	7.93073	8.50755	8.38933	8.443	8.27687	9.18201	9.23854	9.25041	9.02111	9.24901	9.3198	7.45642	6.87984	7.53859	7.27192	7.81074	7.33413	7.03515	7.58684	7.61971	7.64056	8.1989	7.90265	8.43546	8.03695	7.70842	7.6903	8.47431	8.22824	8.94428	8.82984	9.07852	9.16157	9.31166	9.31939	7.89853	8.1135	8.27701	7.79939	7.36614	7.51222	6.45473
2700007P21Rik	9.19707	9.63735	9.41424	9.59628	9.04305	9.14364	9.91858	10.2392	10.2387	10.1511	9.98975	9.96865	10.0618	9.93508	9.80093	10.0387	9.91958	10.4206	9.64151	9.53192	10.0961	9.18253	10.1043	9.75529	9.51402	9.42929	9.72266	9.45358	9.70874	9.79504	9.98468	10.2512	10.045	9.99569	10.1024	10.1968	9.89354	9.48132	9.70116	9.67985	10.1169	9.90341	9.62359	9.98542	9.99114	9.87586	9.72551	10.39	9.2823
2700029M09Rik	9.74031	9.92381	9.6921	9.79396	8.45123	9.38851	9.89793	10.1322	10.298	10.1005	10.15	9.95999	11.1383	10.8259	11.0663	10.9117	10.8372	10.8725	9.34699	9.3193	9.0942	9.8432	9.84481	9.92085	9.74432	9.13714	9.5804	9.80631	9.95642	10.0307	10.0461	9.93292	9.94029	10.1408	10.2559	10.0924	11.1118	10.9898	10.8932	10.7106	10.6179	10.7047	9.78444	10.0591	10.0469	9.04803	9.41578	9.56638	9.3255
2700046A07Rik	5.10997	5.31062	5.18001	5.3543	5.37791	5.37936	5.08817	4.96404	5.08178	5.28315	5.31873	5.21627	5.49294	5.59799	5.70228	5.52185	5.54461	5.5017	5.61918	5.0578	5.02772	5.44437	5.8814	6.05006	5.97278	5.60462	7.19386	5.66565	5.52836	5.72707	5.02122	5.16033	5.16114	5.20135	5.29825	5.35411	5.41784	5.30075	5.28268	5.1593	5.20283	5.29486	5.48952	5.61203	5.56959	4.98627	5.21186	5.18841	6.9687
2700046G09Rik	5.60217	5.87502	5.58874	5.78205	5.81114	5.46697	5.81839	5.72418	5.76118	6.03437	5.83852	5.6937	5.83967	5.88321	5.64753	5.60604	5.64075	5.65375	6.34611	6.15306	6.75278	6.04858	6.41704	6.92162	5.64192	5.64502	5.65583	5.75547	5.67235	5.68988	5.76483	5.94974	5.75775	5.64187	5.61287	5.91423	5.71691	5.68556	5.62504	5.74691	5.64154	5.87086	6.14636	5.88875	5.82079	6.1465	5.84155	6.48372	5.81003
2700049A03Rik	7.92442	7.55519	7.85393	7.70393	6.96116	7.05081	8.01401	8.0123	8.23402	8.15527	7.95161	8.28982	9.18379	9.36158	9.29006	9.22371	9.16739	9.3121	8.2458	8.10474	8.11833	7.71564	8.11854	7.92337	7.48419	7.32338	7.37325	7.62602	7.89536	7.97629	8.07323	7.99477	7.80847	8.58451	8.40669	8.37538	9.36402	9.31098	9.36421	9.24689	9.2255	9.31455	8.40795	8.33357	8.41818	8.25984	7.90503	8.27359	7.22134
2700050L05Rik	8.51119	8.27387	8.1734	8.26262	6.70745	8.22098	8.35193	8.57272	8.44487	8.10663	8.45111	8.69076	9.12367	9.14212	9.13463	9.19854	9.10311	9.26652	8.67764	8.13291	8.44039	7.05801	8.54431	8.09179	8.12214	8.15722	7.87189	8.51163	8.04673	8.38029	8.63647	8.56379	8.59774	8.39969	8.45138	8.50829	9.64421	9.73799	9.85463	9.65971	9.59202	9.58168	8.29619	8.18267	8.40895	8.38865	8.57998	8.31309	8.04753
2700060E02Rik	11.0545	11	10.9434	11.2331	11.4708	10.9359	10.954	10.883	10.7588	10.7757	10.6667	10.9077	11.3871	11.5173	11.4561	11.4182	11.4657	11.3031	10.6133	10.7178	10.4378	10.8228	10.7072	10.5849	11.1419	11.2375	11.1359	11.1478	10.9682	10.9264	10.7819	10.7574	10.5448	10.8334	10.7738	10.675	11.5419	11.4856	11.4662	11.5117	11.3554	11.4854	10.2015	10.4481	10.5062	10.5206	10.8372	10.7868	11.2703
2700062C07Rik	7.05346	7.76651	7.39522	7.50607	7.9053	7.15075	7.9252	7.78243	7.96801	8.18678	8.25257	8.04563	8.01632	8.25842	8.13478	8.1731	8.39697	8.70465	7.63917	8.10244	8.09624	8.06958	8.07129	7.33423	7.47831	7.21999	7.38826	7.13314	7.77426	7.32061	7.98622	8.044	8.0495	7.8057	7.88541	8.48122	7.96715	7.86747	8.10259	8.23227	8.26788	7.81371	7.96118	8.03987	7.99139	8.51363	7.63809	7.83544	6.38882
2700078E11Rik	9.60655	9.77586	9.65297	9.85417	10.1051	9.59478	9.09031	9.33636	9.47357	9.32353	9.34689	9.59951	9.98749	9.49821	9.12253	9.5942	9.64011	9.52527	9.63497	9.27342	9.36869	9.45778	9.45316	9.51392	9.72797	9.97635	9.85044	9.58296	9.66349	9.54895	9.23419	9.39242	9.15762	9.21374	9.27579	9.24721	9.69488	9.55702	9.19085	9.78846	9.81245	9.64265	9.21333	9.30181	9.4189	9.75942	9.31938	9.30995	9.47434
2700078K21Rik	6.13062	6.17433	5.99937	6.20901	7.26105	5.22234	5.85446	5.90285	5.97612	5.58266	5.82199	6.35584	5.65498	6.76041	5.80686	5.77652	6.03911	6.88404	5.53313	5.69067	6.19342	5.93116	5.61923	5.95361	6.08893	5.98086	5.81047	5.64341	6.27425	6.20016	6.95834	5.73985	5.59182	5.38381	5.79445	5.31065	6.07869	7.56421	6.54257	5.79125	6.12171	6.5043	6.23437	6.65721	5.90669	5.61227	5.85671	5.20781	7.36989
2700081O15Rik	6.34532	6.16787	6.42207	6.30397	6.22769	6.21103	6.44758	6.66738	6.60665	6.32937	6.44909	6.17358	6.15492	6.15243	6.07236	6.0177	6.17769	6.25301	6.32123	6.16228	6.31418	6.29231	6.11003	6.326	6.26419	6.2649	6.7556	6.33686	6.27866	6.21575	6.21194	6.31345	6.2698	6.39321	6.37223	6.41683	6.00988	6.1581	6.11188	6.26029	6.28808	6.27571	6.22948	6.26971	6.13047	6.02093	6.4068	6.25785	6.44869
2700089E24Rik	8.22769	8.37274	8.55937	8.45688	8.45419	8.49756	8.56789	8.71786	8.88173	8.6504	8.34451	8.16506	7.48836	7.59215	7.48339	7.4395	7.43856	7.52222	9.0492	8.60392	8.91427	8.64646	8.82627	8.75536	8.40294	8.69345	8.81948	8.46061	8.42772	8.41719	8.1864	8.55054	8.50291	8.40333	8.45289	8.31637	7.61349	7.54492	7.62432	7.23409	7.61285	7.27682	8.4513	8.37059	8.55063	8.99462	9.34193	8.76181	8.94476
2700094K13Rik	10.5651	10.822	10.3562	10.6823	11.0078	10.3946	10.3803	10.5822	10.612	10.7455	10.6448	10.3802	11.2677	11.355	11.3299	11.4319	11.4058	11.4625	9.61537	9.62024	9.37997	10.4812	10.5869	10.4147	10.4484	10.3149	9.97507	10.3734	10.7195	10.588	10.0323	10.402	10.1414	10.2572	10.6538	10.4404	11.401	11.2326	11.1856	11.3239	11.336	11.105	10.7538	11.1594	10.7528	8.93554	10.0953	9.76517	10.6062
2700097O09Rik	8.04502	8.33437	8.45866	7.92886	7.73958	7.68318	8.27061	8.28675	8.53855	8.46956	8.46539	8.14613	8.85225	9.19164	9.14305	8.99249	9.16549	8.95634	7.89428	8.11235	8.10741	7.67034	8.04559	8.1576	7.97825	7.60102	7.81961	8.08689	8.30848	8.3813	8.27416	8.456	8.25264	8.24658	8.26416	8.20897	9.26198	9.00769	9.06428	9.32026	9.11887	9.14089	8.14976	8.05306	8.08387	8.22935	8.40609	8.27868	7.7157
2700097O09Rik	7.32968	7.60882	7.64155	7.84947	6.9026	7.44886	7.53949	7.5948	7.68352	7.84653	7.14087	6.76714	8.50066	8.71823	8.321	8.68902	8.66271	8.81854	7.66759	8.1555	8.48722	8.37456	7.89247	7.97464	7.63577	7.43043	7.60553	7.67907	7.50474	7.22806	7.81273	7.99283	6.9802	7.69325	7.53622	7.45543	8.57795	8.54628	8.79409	8.94693	8.84663	8.4922	7.80985	7.33779	7.4448	8.01083	7.53045	8.29911	7.86913
2810001A02Rik	7.81862	8.06519	7.91874	7.95053	9.37635	7.39993	7.64916	7.87534	7.77995	7.93352	8.10982	7.61321	7.38727	7.6559	7.6271	7.62952	7.39265	6.94387	7.74864	7.98736	8.60665	8.39839	8.0475	8.13679	8.58855	7.99194	8.13847	8.22704	7.85963	8.18434	7.48193	8.04905	7.87704	7.32588	7.75165	7.79203	7.13934	6.95033	6.92055	7.35788	7.02963	7.06513	7.80106	8.05321	8.20953	8.58334	7.47373	8.00712	7.7541
2810002N01Rik	7.00299	7.16123	7.15869	7.20923	7.76154	7.07034	7.43464	7.36252	7.36634	7.44221	7.45474	7.57462	7.47718	7.09963	7.39368	7.19376	7.50068	7.30123	7.12743	7.11881	7.33789	6.98021	7.14935	7.18982	7.15247	7.20475	7.24863	7.01585	7.03065	7.09101	7.37969	7.40199	7.24857	7.65343	6.9981	7.465	7.03324	7.13386	7.11567	7.18666	7.42949	7.15792	7.39998	7.45095	7.24789	6.98191	6.98681	7.68399	7.22077
2810004N23Rik	9.32911	9.09555	9.28692	9.42058	9.35347	8.70064	9.41813	9.33768	9.59565	9.57726	9.36785	9.29609	10.2184	10.2665	10.2447	10.2653	10.3179	10.3466	9.6892	9.75781	9.63033	9.76124	9.8379	9.65746	9.2411	8.53074	8.98245	9.31314	9.05591	9.06598	9.39798	9.58018	9.62539	9.03323	9.45926	9.59437	10.0937	9.98441	10.1523	10.4108	10.3267	10.2625	9.45315	9.67918	9.48691	9.77976	9.46995	9.65142	9.7194
2810006K23Rik	5.69255	5.73444	5.8332	5.71419	5.95914	5.59876	5.78166	5.66662	5.81678	5.5665	5.5847	5.82127	5.65714	5.86294	5.63216	5.7967	5.78216	5.70557	5.69333	5.73183	5.75898	5.49705	5.70233	5.61639	5.73936	5.7504	5.88691	5.72627	5.58996	5.63899	5.84777	5.59669	6.0341	5.76867	5.68713	5.75694	5.73908	5.66346	5.70442	6.00527	5.87287	6.01471	5.99929	5.8046	5.75077	5.86921	5.7005	5.58372	5.66794
2810008D09Rik	5.92968	6.18352	6.21023	5.92454	6.49182	6.43255	5.6266	5.72333	6.05447	5.88542	5.74861	5.7606	5.98214	6.37455	6.09463	6.13968	6.0383	6.06602	5.78184	5.80027	6.24956	5.96648	5.73719	5.85983	5.74836	5.82129	6.16749	5.71994	5.71039	5.94841	5.74317	5.97958	6.28183	5.82081	5.75663	5.84589	5.88662	5.64108	6.35592	6.00877	5.98844	5.88798	5.75532	5.73643	6.29946	5.71306	5.90392	5.72172	5.8962
2810008M24Rik	8.75668	8.69605	8.6666	9.30969	8.39407	9.11838	8.0671	8.1865	8.27294	8.34055	8.21182	8.1804	7.53494	7.93603	7.38973	7.71317	7.9588	7.90919	8.32758	8.01853	8.0496	8.32955	8.46716	8.25203	9.26145	9.15116	8.76141	8.48172	8.50802	8.4979	8.33643	8.55516	7.94067	7.85342	8.16493	8.31037	7.44266	7.42002	7.28007	8.2506	7.98435	7.93204	8.37972	8.55309	8.53031	8.36141	8.65069	8.30394	8.952
2810021B07Rik	5.84115	5.77093	5.74158	5.76916	5.70416	6.17388	5.91407	6.04213	6.09121	5.8915	5.99847	6.00073	5.98112	5.74097	5.65638	5.66066	5.85362	5.53831	5.63254	5.38935	5.32008	5.79898	5.47052	5.49435	6.34874	5.75461	5.76412	5.71627	5.58131	5.85734	5.96268	5.77385	5.94586	6.01319	6.03377	5.80433	5.63575	5.92967	5.66624	5.63415	5.53975	5.68816	5.46389	5.08564	5.43345	5.43704	5.79746	5.93941	5.78722
2810021G02Rik	7.27926	7.53167	7.06244	7.86692	5.76631	7.28113	6.82962	7.37922	7.96987	6.99303	5.29883	7.27069	6.45219	6.37006	6.02998	6.61947	6.4165	6.09728	7.33025	6.45715	6.78636	6.23517	6.72795	6.61952	8.33799	7.81494	8.03699	8.49058	7.71146	8.18889	7.68787	7.0761	6.38083	6.39257	6.55621	6.49061	5.95368	6.68765	6.54165	6.45786	6.58555	5.94168	6.37348	6.83697	7.16979	6.83753	7.07796	6.83632	7.29221
2810025M15Rik	10.3526	10.4766	10.4856	10.515	10.145	9.96223	8.66907	9.18223	9.16906	9.01037	8.88476	9.00178	8.88245	9.06456	9.21675	9.07971	9.28881	9.24389	8.66386	8.77687	8.54105	8.03714	8.7717	8.35946	10.379	10.0837	9.71767	10.1036	10.3914	10.3916	8.71295	8.73772	8.75349	8.93494	9.21622	8.94201	8.94712	8.83029	8.81805	9.23013	9.31605	9.21348	8.75786	9.3298	8.95833	7.77497	8.534	8.32632	10.0587
2810026P18Rik	10.3914	10.7903	10.2294	10.3694	9.64077	10.4134	10.2375	9.96966	10.7364	10.4328	10.3179	10.3846	10.2208	10.2738	10.2156	10.5061	10.3266	10.5771	10.0714	10.141	9.5524	10.1921	10.2208	10.3353	10.1632	9.54559	10.2216	10.003	10.1702	10.0523	10.3245	10.471	10.1996	10.2785	10.3892	10.4704	10.0539	9.79734	10.0164	10.2088	10.1123	10.1179	10.0709	10.207	10.015	9.95509	10.0652	10.0522	9.95838
2810046L04Rik	9.79677	9.88932	9.69049	9.86579	7.99796	9.41405	9.7775	9.59653	9.89156	9.75453	10.0361	9.39499	8.81261	9.10998	8.95074	9.16717	9.25504	9.27532	9.2945	9.53194	9.31014	9.45115	9.57938	9.7095	9.61203	9.61423	8.76647	9.41863	9.5571	9.71533	9.28856	9.56023	9.11517	9.55051	9.15547	9.82946	8.67466	8.20875	8.61197	9.02552	9.30961	9.11035	9.40935	9.44718	9.44063	9.46144	9.64405	9.35412	8.78519
2810055F11Rik	7.72855	7.35676	7.3519	7.85771	7.51346	7.22604	7.2262	6.83003	7.60574	7.39195	7.56695	7.5139	5.82955	5.63936	6.15321	5.93809	5.88669	5.80343	6.22332	6.41314	6.35737	7.26229	6.95807	7.2175	7.56371	7.67306	6.88842	7.36879	7.45971	7.2878	7.39755	7.40071	7.0289	7.42711	7.93672	7.76721	5.64723	5.56779	5.86996	5.68049	5.74586	5.65669	6.80501	7.34103	7.44091	6.75722	7.60103	7.43166	8.31334
2810055G20Rik	7.75927	7.11421	7.41704	7.67138	6.42289	6.13771	5.59684	6.62849	6.55858	6.1849	6.26763	5.40573	4.9675	4.86909	4.95971	5.00213	4.76942	4.99675	6.10435	6.18631	6.09766	6.50006	7.06246	7.37112	7.5116	6.82858	5.52921	6.72065	6.46531	6.43492	7.99288	6.93841	6.25577	6.43412	6.08543	5.62887	4.9159	4.7886	4.98455	4.88057	4.86227	4.90567	7.84067	6.17838	6.92745	7.74742	7.11148	8.26089	7.11862
2810055G20Rik	7.74282	7.43099	7.82574	6.97269	5.76091	8.07116	7.11727	6.55935	6.79821	6.67089	6.43943	5.8325	5.08187	5.0289	4.96291	4.83275	4.88086	4.75927	6.67795	6.54997	7.53624	6.83813	6.83928	6.63779	7.33282	7.12109	6.36347	7.25687	6.95881	7.16003	7.246	7.30947	6.69285	7.37814	6.71708	6.57098	4.9265	5.00923	5.7806	4.97159	4.84603	4.75773	7.08409	6.12629	5.97123	6.91164	6.71326	7.3555	6.81766
2810055G20Rik	6.23712	6.26738	6.34732	6.43062	5.74463	7.05183	6.14641	5.5405	6.22278	6.07588	5.41973	5.84007	4.99939	5.04976	5.22254	5.38197	5.276	5.2421	6.80433	5.99584	5.58913	5.54418	5.99772	6.83366	6.33321	6.00234	8.84551	6.89112	5.8181	6.00754	6.36651	6.20267	6.51519	5.6587	6.11294	5.77773	5.05573	5.35625	5.41145	5.26598	5.04514	5.08632	5.61986	5.59273	5.76638	8.16367	6.827	6.14232	5.92738
2810403A07Rik	10.3051	10.345	10.0149	10.306	9.97137	9.99079	10.1502	9.88659	9.98605	10.0494	9.80603	10.0073	9.6574	9.96464	10.0255	10.0189	9.98789	10.0199	10.0925	9.98207	10.3328	9.88793	9.90744	10.1836	10.6928	10.5986	10.0507	10.5396	10.1371	10.1823	10.171	10.098	10.2008	9.85829	10.0609	10.0102	10.0216	9.99955	10.01	9.99802	10.0096	9.98548	10.416	10.0186	10.1957	10.2933	10.2576	10.1581	10.4393
2810405K02Rik	6.7098	6.87611	6.81064	6.63478	6.40802	6.66585	7.34558	7.83495	7.70746	7.82979	7.54596	7.36438	6.12736	6.15156	6.05059	6.1792	6.21539	6.17464	7.90496	7.7537	7.35415	7.43194	8.04117	7.8319	6.65001	6.67908	6.54423	6.73331	6.76963	6.97676	7.6472	7.8031	8.03212	7.05138	7.53789	7.52542	6.19871	6.39543	5.9353	6.24177	5.58035	5.86152	7.06096	7.9041	8.10638	7.99566	9.38651	8.36926	7.00521
2810407C02Rik	10.074	10.638	10.1578	10.6436	10.0849	10.2967	10.7729	10.6298	10.578	10.6357	10.6687	10.7158	10.3547	10.1312	10.1337	10.529	10.5225	10.3356	10.8668	10.7358	10.8374	11.0188	10.9976	10.7311	10.5693	10.3367	9.21381	10.5207	10.6895	10.3145	10.751	10.8479	10.2882	10.7089	10.7829	10.7916	10.4699	10.2728	10.5078	10.5236	10.5962	10.599	10.7023	10.9	10.9525	10.8883	10.4486	10.7329	10.4251
2810408A11Rik	5.82829	5.60067	5.98349	5.92075	5.77498	5.90413	6.2326	6.61287	6.7982	6.51836	6.21208	6.28155	5.49673	5.6119	5.38589	5.4281	5.50497	5.35443	6.99269	6.53404	6.16735	5.6422	7.28788	6.90646	5.88009	5.85633	6.01632	5.66732	5.95783	6.07368	6.34289	6.53565	6.21154	5.68083	6.32834	5.84876	5.48635	5.59747	5.24412	5.38967	5.67163	5.41783	6.43625	6.80719	6.15355	7.47892	7.39146	7.02574	5.92669
2810408M09Rik	7.53046	8.15737	8.16819	8.096	8.72906	7.43567	7.48844	7.81195	8.04023	7.56692	8.09346	7.57719	8.00629	8.54052	8.14807	8.38867	8.10984	8.47964	7.5116	7.5158	7.38712	7.5334	7.70254	7.41983	7.68842	7.59863	7.77181	7.33469	7.82822	7.81782	7.17196	7.75921	7.71495	6.89135	7.32681	7.82152	8.41636	8.4641	8.13529	8.2517	8.42974	8.59716	8.02331	7.91878	7.18993	7.89302	7.42331	7.75488	7.7204
2810408P10Rik	6.71189	7.22121	7.07735	6.84452	6.42003	6.64953	7.52164	6.39685	7.63894	7.62517	6.39632	6.90513	7.17175	7.26962	7.67899	7.1429	7.58688	7.38863	7.83111	7.61071	7.9249	7.28578	7.39192	7.16247	7.24573	6.89234	7.46126	6.61359	7.36479	7.17418	6.95894	7.22425	7.92235	6.819	7.45464	7.27679	7.34093	7.4678	6.87469	7.50977	7.67153	7.554	7.75435	7.321	7.38718	8.23418	6.59126	7.8261	6.83525
2810416G20Rik	6.23243	5.22988	5.45564	5.81903	5.72067	6.22911	7.19611	6.08644	7.76401	6.53017	5.89387	5.76368	5.00624	5.63427	5.72937	7.71306	5.39571	5.15329	8.89551	9.1452	8.80443	5.16462	6.2408	7.50991	6.43035	6.31964	6.8588	5.73376	5.42995	5.77636	5.60587	6.59588	5.86431	5.59338	5.49788	6.072	5.38489	5.771	4.782	5.48594	5.89639	5.11762	5.83176	4.81087	5.21141	6.90536	5.77299	6.76083	5.87856
2810417H13Rik	9.56059	9.78079	9.60109	9.6546	9.68706	9.0332	9.52892	9.57006	10.2173	10.3305	9.90268	9.89807	7.6517	7.62249	7.90665	7.94666	7.84984	7.6682	6.82498	6.84257	5.89843	7.17069	7.21668	6.8118	8.89923	8.22338	8.62542	8.93939	9.51269	9.58197	9.19979	9.57614	9.53094	9.41027	10.0948	9.83863	7.659	7.4165	7.36172	7.43993	7.92215	7.32539	7.82199	8.37952	8.42576	5.47605	5.7522	6.29886	8.71676
2810422J05Rik	8.57164	8.67642	8.74767	8.45705	8.84588	8.37035	8.65378	8.57929	8.75257	8.68332	8.47954	8.40751	9.18332	8.84874	8.83944	9.06087	8.97054	8.77672	8.85258	8.86339	8.69439	8.48191	8.82779	8.87868	8.48227	8.63428	8.51349	8.44062	8.50249	8.48699	8.61075	8.71841	8.29753	8.63754	8.74578	8.57289	8.73777	9.00876	8.7473	9.11621	9.32335	8.9152	8.90946	9.25429	8.78183	8.97771	9.05647	9.0597	8.13842
2810422O20Rik	5.98839	6.2025	5.92159	6.13128	6.05018	6.29146	5.86962	6.12134	6.14057	6.20176	6.12513	5.93727	6.36999	6.66779	7.28931	7.00485	6.58984	6.43352	6.28293	6.28426	6.39318	6.2618	6.18024	6.4441	6.23427	5.65387	6.09987	5.73625	5.82847	5.7962	5.74994	6.13478	6.0489	5.89412	6.22436	6.01628	6.75125	6.3499	6.33131	6.35133	6.55524	6.46636	6.30894	6.16719	6.23222	6.21049	6.4011	6.23163	5.99746
2810428I15Rik	6.16268	6.32637	6.55899	5.9865	6.49971	6.19357	6.40966	6.50656	6.11273	6.49003	6.4744	5.98703	6.6556	6.66321	7.13219	6.79679	7.22224	6.81233	6.88366	6.12927	6.27788	6.50193	6.24643	6.18085	6.23999	6.30924	6.56137	6.17921	6.39805	6.55795	6.49089	6.21188	6.24972	6.0932	6.6956	6.31516	6.57048	6.87113	6.39258	6.66728	6.63576	6.74425	6.16041	5.91793	6.23731	7.26735	6.66631	6.23344	6.59085
2810432D09Rik	7.42283	7.87669	7.65362	7.50045	7.2513	7.69007	7.75739	8.11091	7.90881	7.9184	7.63106	7.48466	7.5679	7.83909	8.00137	7.47799	7.84997	8.14538	8.18324	7.64762	7.09693	7.2537	7.44464	7.42336	7.31593	7.06871	6.95037	7.44781	7.48347	7.27885	7.72881	7.75875	7.04832	7.26159	7.73556	7.85632	7.59988	7.31922	7.368	7.57337	8.09008	7.78713	7.47997	7.57068	6.91925	7.54446	7.91778	7.25915	7.40811
2810432L12Rik	5.98327	6.08134	6.45411	6.15479	6.40725	5.91093	5.59895	5.47791	6.37199	5.80471	6.33523	6.04629	5.38824	5.48119	5.5027	5.54292	5.4683	5.44848	5.62692	5.68747	5.68016	5.94337	5.57817	5.65242	5.96993	6.01832	6.31243	6.00319	5.85279	6.45515	5.62381	5.71241	5.5761	5.93287	6.02205	5.80008	5.75582	5.55797	5.90437	5.59327	5.46384	5.70103	6.21857	6.72737	6.08565	5.58561	5.57167	5.58159	6.49495
2810453I06Rik	7.86176	8.26895	8.10421	8.25951	8.51957	7.92539	8.21288	8.48364	8.30757	8.25492	8.19735	8.39939	8.1819	8.12684	8.00814	8.16285	8.55667	8.35751	8.3384	8.03008	8.12629	8.26146	8.24828	8.28458	7.94444	8.3995	8.11665	8.22814	8.13352	7.96643	8.93299	8.49707	8.73611	8.3293	8.26168	8.40999	8.20157	7.932	8.34371	8.23868	8.4725	8.32618	8.00562	7.58567	7.88837	8.14619	8.37126	8.38981	8.24452
2810474O19Rik	9.58311	9.35089	9.38265	9.57943	9.43859	9.22649	10.2808	10.1004	10.317	10.1095	9.78892	9.9918	10.0852	10.1431	10.1286	10.1347	10.1822	10.227	11.0352	11.0226	11.0093	10.1185	10.1785	10.4355	9.71128	9.53864	9.39751	9.25085	9.32706	9.25896	10.0276	10.2412	10.1285	9.96876	10.0473	10.2848	10.0116	10.0623	10.05	10.1136	10.3093	10.0939	9.48637	9.34819	9.59181	10.7166	10.3422	10.5934	9.8606
2900006K08Rik	4.72261	4.77959	4.87513	4.96993	4.82256	5.03495	5.14143	5.21093	5.29743	5.4462	5.21254	5.16964	5.0634	4.98964	4.95099	5.07458	4.91973	5.05645	5.32561	5.27991	5.28306	6.761	5.82401	6.72391	4.94285	4.69406	4.90452	4.88154	4.74112	4.75396	4.86564	5.34427	5.45437	5.18865	5.41627	5.5848	5.2734	5.61532	5.06286	5.10927	5.34663	5.1115	5.74123	5.70447	5.61472	5.45045	4.96791	5.46239	4.86222
2900010J23Rik	9.4292	9.55701	9.46679	9.36911	9.4287	8.80706	9.4132	9.69738	9.61881	9.68377	9.23839	9.21789	9.65353	9.82499	9.71497	10.0035	9.87547	9.76321	9.1839	9.25731	9.29702	8.91061	9.21181	9.32973	9.23107	9.30516	9.01826	9.48062	9.49756	9.4408	9.2687	9.42203	9.3071	9.4915	9.71139	9.38769	9.92643	9.67148	9.48057	9.75466	9.793	9.5129	9.22037	9.26431	9.32558	8.84826	9.10684	9.29245	9.62867
2900010M23Rik	6.53086	7.12242	7.10797	6.91304	8.5904	6.49259	6.57358	6.80106	6.89274	7.27654	6.53189	6.56166	7.31909	7.64568	7.37005	7.26922	7.68415	7.28162	6.8492	6.84831	6.82376	6.60623	6.52462	6.90885	6.86414	6.86359	6.4972	6.82481	6.77263	6.83045	6.59348	7.18433	6.25362	6.67776	6.6076	6.60608	7.73974	7.45807	7.17622	7.33006	7.31232	7.18706	6.89837	6.9223	6.6374	6.90648	7.09695	6.89606	7.14257
2900010M23Rik	9.08397	9.86885	10.2351	9.63139	11.7312	9.93983	9.19102	9.52602	9.44809	10.1533	9.11959	9.07293	10.0977	10.5173	10.2768	10.2542	10.4493	10.3412	9.62433	9.55132	9.62728	9.31578	9.45522	9.73023	9.57832	9.97973	9.34931	9.36414	9.63194	9.56558	9.15481	10.0764	8.91945	9.03932	9.36029	9.3633	10.5324	10.4461	10.2642	10.3101	10.0531	10.0805	9.58112	9.62615	9.13809	10.1068	10.0215	9.67515	9.87792
2900011O08Rik	5.49842	5.41602	5.54617	5.63151	5.5851	5.61202	6.27459	6.31354	6.06669	6.4221	6.12516	6.3707	5.65794	5.54785	5.55218	5.44083	5.48882	5.53423	7.17806	6.98164	7.50345	7.83715	6.49995	6.69708	5.50403	5.77043	5.7691	5.61841	5.2542	5.48895	7.48954	7.26019	6.41924	5.79691	5.67629	5.66876	5.58185	5.68948	5.41975	5.90857	5.6881	5.73138	6.1638	6.10745	6.64696	7.75065	7.73342	7.4287	5.55816
2900026A02Rik	5.91249	5.72005	5.84882	5.8704	5.63443	5.67929	5.38633	5.32641	5.30779	5.36649	5.36471	5.41692	5.3306	5.36813	5.40866	5.51757	5.45759	5.32145	5.54049	5.54747	5.63984	5.61717	5.52092	5.52385	6.25839	6.27912	6.42252	5.84913	6.02977	6.28019	5.34326	5.36507	5.43004	5.45974	5.31168	5.46659	5.58235	5.46831	5.46901	5.53935	5.51719	5.44324	5.48592	5.33737	5.32852	5.60139	5.44728	5.57506	6.10924
2900060B14Rik	5.77233	5.83765	5.72908	5.4509	6.10089	5.69019	5.35455	5.49949	5.45478	5.6282	5.65706	6.06985	5.43727	5.66387	5.69031	5.55548	5.56002	5.71817	5.43588	5.63104	5.66032	5.56704	5.58992	5.53846	6.01259	6.03437	5.4732	5.51034	5.63764	5.65421	5.76977	5.79334	5.69965	5.69385	5.53128	5.87595	5.53174	5.38021	5.61811	5.45384	5.60611	5.4624	5.9864	5.54871	5.5613	5.76039	5.51998	5.61276	6.08812
2900062L11Rik	9.65774	9.60923	9.62499	9.82482	9.47324	9.23667	10.8205	10.5204	10.696	10.996	10.9579	10.796	8.26083	9.05591	8.54334	9.03264	8.52441	8.64409	11.4045	11.6373	11.3769	11.7167	11.401	11.3036	9.67713	9.6789	9.68548	10.1906	9.97445	10.0581	10.9886	11.2473	11.2154	11.1691	11.3505	10.9127	9.04449	8.28784	8.93271	8.82186	8.57677	9.31367	11.2393	11.4308	11.7658	11.6419	11.9828	11.6782	9.93149
2900064A13Rik	9.55258	9.65281	9.4041	9.80603	9.23103	9.2712	9.54168	9.37273	9.81711	9.65703	9.23831	9.46886	8.9174	8.89043	8.71325	8.40113	8.89421	8.69019	9.32245	9.23035	9.59092	8.90865	9.51431	9.509	9.47279	9.15026	9.24345	9.58033	9.64025	9.92732	8.87343	9.56581	9.62408	9.73932	9.6576	9.54001	9.13729	9.13304	9.06546	9.07541	8.85175	8.89133	9.89718	10.11	10.023	9.47605	9.52151	9.57132	9.92231
2900073G15Rik	11.7408	11.7227	11.4985	11.8424	11.5711	11.4141	11.5496	11.4993	11.4897	11.5632	11.3375	11.4159	11.255	11.5305	11.3831	11.4764	11.4967	11.4188	11.1214	11.1475	11.2162	10.9204	11.3763	11.4004	11.7955	11.684	11.3343	11.8894	11.7108	11.6647	11.4028	11.345	11.4953	11.3578	11.5754	11.2221	11.4237	11.329	11.1873	11.4497	11.2985	11.2983	11.6201	11.5455	11.615	11.2889	11.1799	11.3581	11.6714
2900092E17Rik	9.84537	9.90836	9.99935	9.77304	10.1834	10.0412	10.1564	10.5124	10.3694	10.0473	10.3456	10.184	10.5076	10.5135	10.6059	10.5114	10.5074	10.6465	9.85876	10.1954	9.95746	8.52696	9.76218	9.68407	9.43701	9.63174	10.1587	9.74685	9.72202	9.97023	9.68852	10.2089	10.2586	10.1088	10.1447	10.4121	10.194	10.4578	10.2803	10.6046	10.3297	10.8929	9.79855	9.85944	9.58692	9.06422	10.287	9.90148	10.1392
3010003L21Rik	7.05199	7.11503	6.77264	7.09123	7.04077	7.26008	7.53548	7.68978	7.32289	7.2813	7.26628	6.40836	6.44198	6.40125	6.27742	6.01631	6.48948	7.18843	7.37035	7.92306	7.69054	7.66573	6.95138	8.63586	7.56088	7.72674	7.396	6.60351	6.73523	6.86922	7.04447	7.39935	6.35887	6.27487	6.60047	6.28705	6.276	6.233	7.26189	6.46736	6.79891	6.30064	7.73594	6.89518	6.51769	7.17696	7.74592	7.3725	7.07271
3110001D03Rik	9.00121	9.10351	9.20943	9.32883	10.608	9.60785	8.98451	9.24487	9.05399	9.29868	9.01598	8.49861	8.6554	8.78845	8.76913	8.85839	9.1744	8.58584	9.59039	9.39069	9.02678	8.18022	8.81717	8.83764	9.06138	9.27856	8.77252	8.67474	9.04234	8.89853	8.61203	9.34165	8.49226	8.37841	8.70429	9.02987	8.42004	8.20829	8.12428	8.44661	8.4624	7.89695	8.9736	8.7957	8.78123	8.8164	9.43665	9.09112	9.38431
3110002H16Rik	7.72894	7.42065	7.45864	7.87925	7.57636	7.40308	7.21746	6.81652	7.00471	7.04145	7.06136	6.79685	9.03127	9.08216	8.97794	8.83583	9.08308	8.73625	7.36015	7.55206	7.64309	7.75801	7.5146	7.25081	7.87106	7.73674	6.62652	7.81106	7.74478	7.60241	7.39896	7.42452	6.81744	6.70984	6.71926	6.6375	9.05975	9.43052	9.24604	8.96725	9.20832	9.17713	7.50528	7.13864	7.52278	7.654	7.668	7.57998	7.42546
3110003A17Rik	7.61562	7.34908	7.0215	7.67214	6.82288	7.12985	8.5049	8.93265	8.60971	7.89463	7.47597	8.38538	6.40268	6.7296	6.51495	6.38563	6.80496	6.61	7.56828	6.96941	6.51489	7.16201	7.82585	7.09906	7.64158	7.22117	6.72511	7.67198	7.51604	7.7118	8.06193	7.58508	8.39182	7.93527	8.52937	7.94649	6.48975	6.76882	6.59475	6.70663	6.58576	6.46696	7.26214	7.65886	7.46997	6.71272	6.72632	6.77066	6.3538
3110003A17Rik	11.1814	11.1292	11.0953	11.0779	10.8493	10.6458	11.3061	11.3665	11.1485	11.2937	10.869	11.0981	9.25204	9.0899	8.73655	9.30972	8.86642	8.97894	10.6979	10.7355	10.5797	10.6134	10.9531	10.8646	11.0012	10.5917	10.5574	10.8895	11.0434	11.0512	10.6979	10.7713	11.0716	11.0124	11.2959	11.0058	8.31178	8.01935	8.47259	8.56586	8.25862	8.15002	10.377	10.6797	10.4106	10.3959	10.3151	10.3074	10.4604
3110009E18Rik	8.21041	8.54624	8.56722	8.30555	8.70452	8.4139	7.80125	9.07655	8.45693	8.54433	8.27608	7.94271	8.34886	9.60739	9.58826	9.22828	9.45258	8.78588	8.45042	7.70676	8.62081	6.08575	8.0371	7.60027	8.33904	8.80826	9.07733	8.6432	8.3514	8.30213	7.13673	8.47725	7.55494	7.78366	8.40167	8.75963	8.97877	8.64944	8.87663	9.21579	9.05827	8.38807	8.43907	9.2597	7.83963	8.57149	8.22417	8.27221	8.47356
3110021A11Rik	6.02085	5.92063	6.00895	5.90412	6.08705	5.98272	5.78944	6.01604	6.06026	5.80068	5.91681	5.8728	5.99694	6.26886	6.13376	6.17952	6.38012	6.52674	6.04107	6.10131	5.93444	6.98049	5.67302	5.66636	5.87535	6.45916	5.92858	5.8312	5.86985	6.13599	6.06751	6.26686	5.68267	5.76475	5.79568	5.92692	5.74284	5.83035	5.97724	5.82315	5.93884	6.06219	6.14831	5.69259	5.81335	6.2096	5.90919	6.04827	6.13091
3110035E14Rik	5.22588	5.33272	5.22105	5.16411	5.52193	5.19174	4.91417	4.96089	4.94917	5.06905	4.82572	4.89867	4.99385	4.944	4.8871	5.01674	4.94737	4.92128	5.07435	4.98287	4.94967	5.17479	5.61637	5.22087	5.43801	5.36016	5.81481	5.36374	5.36328	5.62961	4.89556	5.02589	4.96148	5.03143	5.02083	5.34524	4.91381	4.92226	4.94552	4.96829	4.92062	4.97318	5.73965	5.88714	5.65189	4.97514	5.04333	4.97266	5.48726
3110040N11Rik	6.54707	6.69307	6.55462	6.57629	5.8255	6.34839	6.46847	6.49399	6.826	6.74669	6.63812	6.77957	6.46622	6.69385	6.90394	6.51456	6.85877	6.66094	6.26751	6.66725	6.57451	6.73454	6.43603	6.33163	6.51513	6.33095	6.51777	6.5273	6.4595	6.7672	6.47187	7.09791	6.78478	6.56431	6.71304	6.80701	6.70353	6.82608	6.5546	6.58307	6.86702	6.58366	6.33161	6.46024	6.69071	6.68379	7.0982	6.783	6.86505
3110043O21Rik	6.9318	6.91296	6.70638	7.06509	7.09819	7.06177	8.04464	7.7625	7.69143	7.61447	7.87037	7.70553	7.59783	7.06725	7.41234	7.39553	7.22716	6.99741	7.941	7.69987	7.41236	7.23154	7.57706	7.33344	6.84144	7.42492	6.65702	7.11861	6.98935	6.58582	7.98804	8.1196	8.15819	7.46073	7.81715	7.60997	7.55008	8.24051	7.94745	7.18395	7.46049	7.2851	7.76341	7.8052	7.70804	8.06031	8.33454	8.1079	7.19383
3110048L19Rik	8.35563	7.78238	7.77934	7.87547	6.79915	7.12645	7.7547	7.03796	7.23457	7.35677	7.41332	6.65286	7.4623	7.06792	7.64472	7.60445	7.58549	7.39882	7.304	7.04527	8.02994	7.91268	7.22791	7.62996	8.34672	7.87998	7.1999	8.38053	7.89012	7.70569	7.50367	7.66633	7.43565	6.54438	7.57299	7.59515	7.4665	7.55137	7.49489	7.79198	7.62882	7.64626	7.61996	6.98134	7.56745	8.27509	7.74179	7.61458	7.80483
3110052M02Rik	6.58564	6.64882	6.59563	6.56784	6.87583	6.93789	6.71318	6.74099	7.12165	6.91399	6.55933	6.29056	6.89497	6.95947	6.84612	6.60704	6.94765	6.91095	7.47855	7.00256	7.39148	7.41	7.22443	7.1345	6.48194	6.61869	6.16533	6.5815	6.6994	6.74202	6.8663	6.99265	6.66447	6.97727	6.80919	6.45134	7.05901	7.24466	6.58262	6.86906	7.10554	6.80718	6.75211	7.23107	6.64342	7.54188	7.75654	8.08747	6.35866
3110056O03Rik	5.78666	5.88284	5.69313	5.87983	6.61045	6.09329	5.65556	5.78382	5.5846	5.80323	5.55718	5.66469	5.75611	5.55497	5.87224	5.83119	5.65214	5.71844	5.81299	5.8247	5.73342	6.11265	5.84821	5.75924	5.76937	6.37276	5.86766	5.81798	5.84408	5.8451	5.55765	5.77336	5.66662	5.59628	5.91292	5.44606	5.57472	5.54675	5.51157	5.70029	5.67323	5.77876	5.62687	5.78909	5.53363	5.87937	5.80415	6.0134	5.73212
3110057O12Rik	5.54206	5.61414	5.76715	5.96319	5.3449	5.44861	5.74589	5.61374	5.38916	5.43966	6.07169	5.6154	5.38738	5.15951	6.17608	5.14208	5.31548	5.09146	5.67093	7.58024	5.69389	5.4403	5.62986	5.80794	5.59164	5.6273	5.20638	6.07603	5.6987	6.07481	6.22176	6.03647	5.28768	5.36216	5.84043	5.83193	5.68555	5.40382	5.13008	5.27194	4.90253	5.36455	5.41427	5.90452	5.64292	6.60566	5.35405	5.68268	6.06174
3110070M22Rik	5.49034	5.42581	5.41706	5.21693	5.40325	5.60951	5.49261	6.11345	5.50319	5.71135	5.85711	5.32144	5.37698	5.35344	5.23938	5.34998	5.39229	5.37426	6.01912	6.09336	5.5924	5.82658	5.88573	6.18254	5.4278	5.39502	5.40122	5.4806	5.38141	5.50162	5.53568	5.65009	5.47398	5.85979	5.62162	5.50047	5.24665	5.40311	5.24069	5.30605	5.33487	5.23805	5.53041	5.21206	5.4646	6.07949	5.95815	5.56091	5.35865
3110079O15Rik	5.9347	5.88877	5.92305	5.87786	6.00629	5.97333	5.79769	5.8612	5.95264	5.85991	5.88752	5.76906	5.86432	5.85394	5.85721	5.99613	5.90094	6.00072	5.86346	6.04867	5.87801	5.99348	5.90051	5.81643	5.96289	5.97701	6.12102	5.96998	5.85509	5.93027	5.87138	5.82543	5.8514	5.7465	5.86174	5.88004	5.79632	5.8567	5.87646	5.87725	5.83352	5.79978	5.86809	5.99225	5.88848	5.85972	6.02654	5.81264	6.03154
3110082I17Rik	7.12627	7.16566	7.43733	7.10007	6.90055	7.33115	7.09347	7.22188	7.16877	7.1036	7.23287	7.46061	7.84664	7.56238	7.83064	7.81627	7.7918	7.77427	6.96349	6.90865	7.00605	7.55558	7.36879	7.10841	6.87552	6.85566	7.12976	7.24586	7.16625	7.16807	7.29554	7.32782	7.4406	7.68828	7.41634	7.37102	7.26362	7.24244	7.34725	7.66972	7.90621	7.831	7.14256	7.02538	7.00897	7.21084	7.29164	7.01421	7.18464
3200002M19Rik	8.43046	8.90434	8.79268	8.45612	7.99928	8.06403	7.97241	8.21437	8.54782	8.34124	8.48633	7.97957	9.71702	9.70921	10.0017	9.73951	9.77848	9.8036	7.49397	7.45119	7.64315	8.73401	8.11318	8.16744	8.12765	8.35423	7.91118	8.40772	8.62594	8.63365	8.20811	7.9478	8.14664	8.54408	8.5939	8.35322	9.88324	9.88999	9.91825	9.69526	9.72141	9.80218	9.03783	8.94118	9.12899	7.51056	7.00358	7.54507	8.12416
3632451O06Rik	6.23831	5.92021	6.18132	6.08656	5.94002	6.47207	7.2411	7.44154	7.54736	6.9098	7.67605	7.24513	6.76868	6.54774	6.48936	6.43419	6.06276	6.8091	5.96839	5.37383	5.8887	6.4518	7.30234	6.81653	6.43725	6.41018	5.662	6.41482	6.59704	6.9406	7.19212	7.02656	7.31443	7.96635	8.55574	8.41272	6.48553	7.12259	7.2031	6.61107	6.27821	6.73951	5.92561	6.31382	5.99847	5.45562	7.50327	6.25357	5.61113
3830403N18Rik	4.84882	4.84502	4.80066	5.0957	4.86027	5.056	4.82119	4.68412	4.67924	4.77886	4.78934	4.73262	7.73065	7.6536	7.49104	8.08388	7.11287	7.44531	4.76446	4.80368	4.74461	4.90889	4.73944	4.76314	4.90341	4.86298	4.85516	4.94805	4.97579	4.79065	4.92219	4.77394	4.79481	5.00754	4.64911	4.93072	7.45246	7.57832	6.96449	6.8956	6.62973	6.49362	5.01136	4.83294	4.78671	4.83236	4.7598	4.79022	4.96253
3830406C13Rik	7.96289	7.95064	7.71145	7.88488	7.55907	8.08043	8.07111	8.17026	8.15243	8.47622	7.46519	7.70832	8.25286	8.62762	8.50653	7.99841	8.446	8.35497	9.69798	8.67535	8.96693	8.08346	8.2156	8.47694	8.25771	8.04431	7.77762	7.9423	7.93422	7.93009	8.04355	8.35475	7.99574	8.04426	8.2417	7.94709	8.82105	9.03201	8.77495	8.63741	8.61676	8.68985	7.99292	8.09836	8.30795	9.16397	8.43423	8.92886	8.23668
4632404H12Rik	5.68551	6.06462	5.41694	5.6283	5.40539	5.92249	5.88118	6.30601	5.79942	6.02767	5.74325	6.14698	5.53988	5.50373	5.85651	6.01765	5.71581	5.66389	5.86786	5.95554	5.89982	5.3858	5.90532	5.42335	5.64213	5.51313	5.70594	5.49963	5.44467	5.72409	5.53742	5.67736	5.53785	5.80806	6.20077	5.9024	5.76507	6.10781	5.93471	5.96783	6.21658	5.90603	6.14291	5.49917	5.76187	5.47506	6.42381	5.84536	5.49029
4632411B12Rik	7.01951	7.38164	7.17809	7.06886	5.9909	7.02891	7.60744	7.63261	7.48017	7.38362	7.44133	7.63947	7.41662	7.4118	7.56751	7.28098	7.19755	7.34987	7.19253	7.21772	7.4178	7.21035	7.45721	7.75381	7.16729	7.1063	7.15807	7.00822	7.17882	7.17656	7.48456	7.44436	7.55058	7.44666	7.4845	7.21221	7.46645	7.63651	7.5676	7.26981	7.3625	7.61903	7.26533	7.47555	7.48999	7.9729	7.37939	7.40696	6.78123
4632415K11Rik	5.81996	5.80542	6.02204	5.82186	5.81853	5.787	5.94145	5.83713	5.76287	5.74346	5.66516	5.94395	5.98312	5.72111	5.7885	5.86417	5.7276	5.90815	6.01077	5.94768	6.27755	5.9208	6.13582	6.08537	5.68319	5.91485	5.93634	5.87348	5.74434	5.88753	5.7082	5.84294	5.94033	6.0355	5.84359	5.85966	5.72524	5.61068	6.00423	5.90888	5.78155	5.92425	5.96013	5.70198	5.82769	5.99524	6.22725	6.12577	5.7913
4632419I22Rik	8.67328	8.53536	8.68085	8.82319	8.32681	8.53752	8.60412	9.07127	9.1829	9.16087	8.85732	8.59045	7.71028	7.75784	8.01751	7.55972	8.15271	7.84548	7.82049	7.67927	8.39492	7.78279	8.26441	8.34592	9.36126	8.75692	8.20382	8.76761	8.75912	8.68159	9.01623	8.84271	8.81681	8.94101	9.12453	8.93166	7.83462	7.95567	7.60745	7.67537	7.61495	7.89793	8.43811	8.85917	8.34612	8.22626	8.29721	8.45125	9.19102
4632427E13Rik	9.0036	9.19622	9.09952	8.81547	8.16923	8.99686	9.57948	9.6578	9.31802	9.29402	8.95699	9.32662	8.33938	8.94254	8.61205	8.78448	8.86011	9.00226	10.1579	10.1548	10.3701	9.24234	9.46807	9.96882	8.7958	8.84938	9.14056	9.12103	8.85449	8.74268	9.69369	9.56878	9.50223	9.24762	9.64634	9.38421	8.88848	8.96177	8.7667	8.92406	9.00027	9.1466	9.49373	8.72417	9.14972	10.2269	9.57603	10.305	7.78194
4632428N05Rik	6.2105	6.27629	6.07988	5.97808	5.92661	5.63928	5.41327	5.40288	5.32488	5.27818	5.31825	5.24091	5.58088	5.60996	5.71828	5.66408	5.51844	5.41102	5.51606	5.55163	5.51873	5.50376	5.36434	5.24884	5.91507	5.9686	5.90505	5.61835	5.70449	5.81873	5.37693	5.39919	5.37738	5.54896	5.29348	5.30772	5.51955	5.61867	5.6179	5.5435	5.56844	5.54052	5.62059	5.29005	5.68748	5.52252	5.43022	5.49408	6.12927
4632434I11Rik	8.20945	7.96552	8.2102	8.81189	8.30214	7.43697	8.33306	7.89269	8.64037	8.68015	8.68278	7.89727	9.53332	9.42101	9.83019	9.65056	9.74924	9.76233	6.47062	6.13258	5.92443	6.8767	7.34702	5.84959	7.59194	7.42893	6.1629	7.07269	8.15478	8.23236	6.87552	8.22694	7.37897	7.84588	8.89782	8.50464	9.5761	9.22164	9.72578	9.99345	9.97945	10.1472	8.07216	8.78247	7.5357	5.83681	9.5069	5.55212	6.3847
4732418C07Rik	9.08661	8.99542	8.66898	9.15951	8.83483	8.62569	8.71377	8.18572	8.8389	8.77638	8.25091	8.96887	7.67122	8.08435	7.76321	7.68823	8.21077	8.41339	8.27089	8.02272	8.44701	8.40355	8.2847	7.47467	8.8431	9.15963	9.06534	8.58413	8.8059	8.68149	8.36683	8.49658	8.08383	7.78507	8.70385	8.97069	7.96156	7.74085	7.80073	8.02136	8.57421	8.25365	8.9652	9.38502	8.88311	8.19143	8.52634	8.44984	8.63408
4732471D19Rik	7.04513	7.0932	6.8714	6.85979	6.37776	7.25393	7.82898	7.56931	7.57716	7.5495	7.66207	7.23689	7.4463	7.49274	7.72712	7.27741	7.75286	7.75796	7.34635	7.0066	7.1449	8.14832	8.43211	8.46741	6.64396	6.63755	5.7344	6.73635	6.89244	6.59131	7.66945	7.64916	7.45028	7.93422	7.58937	7.90251	7.96892	8.02407	8.04362	7.3911	7.2671	7.44101	7.65863	8.01121	7.8033	7.42762	8.02653	7.33313	6.85083
4833408A19Rik	5.84831	6.15532	5.74997	5.5638	5.94901	5.58165	5.76009	6.55893	6.61523	5.91363	5.40875	5.90049	5.49784	5.52253	5.46335	5.38349	5.68213	5.93386	7.7313	6.22145	5.82742	5.95958	5.81064	6.51314	5.74845	5.7691	6.4108	5.5325	5.52711	5.84562	5.59805	6.18831	5.43315	5.65586	5.69316	5.40193	5.44552	5.57259	5.71523	5.71852	5.45179	5.7073	5.56205	5.5568	5.28297	8.25881	5.56751	6.37444	5.85525
4833420G17Rik	9.84789	9.80941	9.65616	9.88461	10.0766	9.24273	10.2108	10.015	9.94428	9.81728	9.90347	10.252	9.84904	9.92238	10.0654	9.77977	9.76185	10.0386	9.60414	10.1027	10.0342	9.84958	9.82264	9.884	9.88265	9.5691	9.76132	9.58068	9.55209	9.56432	10.2344	10.089	10.0173	9.9834	10.0145	9.88301	10.1781	10.0494	10.251	10.2066	10.235	10.3087	9.80296	9.74959	9.8598	9.92093	10.1346	9.87937	9.9981
4833420G17Rik	6.34771	6.90392	5.89949	6.20826	6.43043	6.09702	6.1804	6.52081	6.10759	6.29898	6.18192	6.20902	6.3342	5.92813	6.88625	6.44861	6.23309	6.87439	6.03498	6.00478	5.97012	5.86864	5.90242	6.37853	6.70927	6.03619	7.16219	6.13411	6.13028	6.21043	6.45581	6.16313	6.52194	6.74201	6.12793	6.24209	6.07711	6.17373	6.23396	6.29751	6.30129	6.14829	6.73476	5.92995	5.79794	5.87417	5.88514	6.46618	5.83297
4833439L19Rik	8.6028	9.12397	8.91044	8.90656	8.7444	7.93798	8.93286	9.14126	9.2145	9.17452	9.42438	9.40414	9.59201	9.91827	9.98688	9.86558	9.99725	9.70705	8.60988	8.59873	9.01815	11.0563	9.28051	8.88725	8.78656	9.14379	8.01161	8.53103	9.26212	9.13805	8.91869	9.52825	8.25598	8.63114	9.22012	9.50675	9.69957	9.6513	9.46022	9.62849	10.0572	9.81422	9.47001	9.57767	9.6466	9.17632	8.8168	9.3374	8.41377
4833442J19Rik	7.25806	7.15674	7.2207	6.92922	7.54014	7.74062	7.98851	8.28382	8.00761	7.90573	7.79138	7.37319	7.49271	8.29224	7.84139	8.1301	8.34779	8.19356	9.43067	8.06198	9.31726	7.72246	7.96444	8.13774	7.15128	6.71516	7.39863	6.8712	7.11337	6.39688	8.91816	8.71979	9.00876	8.22012	8.56092	8.00674	8.43797	8.25593	8.21374	8.33184	8.83039	8.47486	7.68755	7.6907	8.31419	9.17491	8.07266	8.89605	7.49254
4921506J03Rik	10.2642	10.3806	10.4235	10.2199	8.97749	9.82295	10.7511	11.0404	10.7287	10.8834	10.9556	10.9789	9.40799	9.35357	9.2196	9.36914	9.38656	9.49497	10.3592	10.5759	10.5263	10.4754	10.5464	10.6877	10.3113	9.90985	9.88216	10.2349	10.4914	10.4571	10.9529	10.9152	10.8852	10.453	10.7082	10.8177	9.05027	9.0289	9.04666	9.07691	9.18246	8.95336	10.5108	10.5158	10.7158	10.7995	10.487	10.7868	9.75983
4921506J03Rik	6.83635	7.08589	7.11747	6.76411	6.91265	6.9139	7.15924	7.16353	7.01854	7.16637	7.31334	7.29242	6.82959	6.68552	6.6698	6.70134	6.68382	6.61048	6.82619	6.94754	7.04867	6.89353	6.99872	7.13006	6.80565	6.74897	6.89025	6.91383	7.00474	6.96723	7.16263	7.0315	6.92162	7.02032	7.0185	7.09229	6.77538	6.674	6.6477	6.55211	6.68308	6.6024	7.16985	7.18047	7.23019	7.11674	6.93524	7.06999	6.74655
4921507P07Rik	5.1171	5.01729	5.0579	5.20237	4.9362	5.14558	4.90694	4.97058	5.10686	5.35169	5.13925	4.99231	4.76692	5.19207	4.94555	4.89919	4.88614	4.89943	5.07549	5.16706	5.15145	5.11597	5.34063	5.40383	4.96117	4.94895	5.20449	4.93465	4.87542	5.06032	5.22237	5.14877	4.97226	5.75265	5.41127	5.61097	5.09049	4.90673	4.97058	5.21432	5.12245	4.90157	7.77459	8.42711	7.83951	5.17553	5.13189	5.08456	5.12453
4921513D11Rik	5.44436	5.40452	5.38662	5.03405	5.38883	5.31831	5.94291	6.18825	5.58242	6.21931	5.68828	5.92855	6.06269	5.45974	5.67098	5.42923	5.78113	5.82664	6.40966	6.856	6.7993	5.35208	6.10558	5.95226	5.5432	5.53419	5.52593	5.40768	5.76865	5.36488	5.65191	5.61582	5.4856	5.94247	5.55294	6.93821	5.40906	5.45334	5.30525	5.55904	5.49704	5.6639	6.62791	5.61917	6.18635	6.25058	6.10743	7.26708	5.30562
4921513D23Rik	8.34864	8.43859	8.18137	8.35565	7.46107	8.00971	8.60475	8.20549	8.62504	8.48781	8.56183	8.52568	8.57919	8.6214	8.70678	8.54453	8.52355	8.77721	8.85153	8.8574	8.87975	8.17194	8.63085	8.81948	8.63954	8.81497	8.16955	8.22201	8.57444	8.43544	8.9279	8.62358	8.51692	8.83612	8.68281	8.85359	8.80414	8.72748	8.73466	8.86729	8.92849	8.7781	8.73062	8.82345	8.8655	8.97784	9.18128	8.88127	8.63571
4921521F21Rik	5.96959	5.99475	5.62225	5.59569	5.50807	6.3147	9.94425	9.97387	9.62128	10.1785	10.3109	9.64896	5.6824	5.41969	5.20264	6.07663	5.46216	5.34737	11.5962	11.7242	11.7698	11.3078	11.4019	11.4054	7.24634	6.43677	5.73606	8.85545	9.35436	9.28788	9.83657	9.87771	9.65288	10.5702	10.5204	10.3997	4.94565	5.39349	5.35412	5.79329	5.74319	5.4967	11.2636	11.3194	11.3495	10.7831	10.9269	10.9191	7.11243
4921522P10Rik	6.14477	5.7842	6.14766	5.77696	6.00634	5.39313	5.3677	5.31247	5.1873	5.42212	5.58695	5.39689	5.44136	5.54913	5.47629	5.5081	5.64852	5.9045	5.28881	5.4777	5.23732	5.31664	5.2406	5.29744	5.62293	5.73656	5.92369	5.66608	5.57214	5.78119	5.35174	5.14809	5.38198	5.38375	5.4698	5.38163	5.51412	5.5219	5.30856	5.46292	5.45544	5.58913	5.28085	5.25023	5.28425	5.30839	5.41173	5.21445	5.49443
4921524J17Rik	9.43084	9.26127	9.28447	9.44277	9.43365	9.02127	9.17697	9.22409	9.08974	9.00473	9.58739	9.03676	9.39638	9.75887	9.59977	9.75046	10.0074	9.78012	8.68026	8.95111	9.02153	7.26201	9.38221	9.23608	9.07617	9.35534	9.78166	9.22182	9.29543	8.97638	9.47336	9.12715	8.46486	8.86754	9.2901	9.12302	9.53941	9.46966	9.48343	9.39993	9.41063	9.49745	9.11376	9.02641	9.57436	9.46283	8.47109	9.81237	10.138
4922501C03Rik	8.48283	8.24563	8.30126	8.3722	7.89022	7.67717	8.34184	8.27351	8.58195	8.27999	8.16522	8.38662	9.08983	8.93864	8.89434	9.03061	9.2383	9.41426	8.12554	8.43594	8.50548	6.61489	8.30638	8.15394	8.32045	8.00803	8.04397	7.65969	8.04541	8.2545	8.01632	8.17072	7.92206	8.0546	8.20636	8.25805	9.08828	9.04994	9.11131	9.33198	9.46697	9.48566	8.22321	8.04728	8.27477	8.29964	8.2052	8.46259	8.06461
4930402E16Rik	6.95529	6.68398	6.97127	6.86208	6.79831	5.93967	7.07971	7.29742	6.91035	7.45013	6.81491	7.10788	8.06426	7.92071	7.67838	7.88189	8.02577	7.79442	7.46982	6.83279	7.28037	8.55724	8.04967	7.70913	7.08884	6.35149	6.52446	6.91157	7.04389	6.99515	7.38988	7.14107	8.1724	7.34331	7.54877	7.19315	8.51589	8.42883	8.22606	8.21484	8.39297	8.36985	8.6328	8.78381	8.54375	7.65002	6.28079	7.09337	6.88554
4930402H24Rik	8.46737	8.17654	8.15999	8.33227	7.17022	8.12243	8.33841	8.26053	8.34241	8.28471	8.56108	8.46694	6.85715	7.20743	7.44374	7.16383	6.97265	7.21236	8.27326	7.97668	8.39381	9.26788	9.23861	9.5182	8.65109	8.86181	8.48365	9.0056	9.02156	9.18885	8.53524	8.42633	8.41611	8.50336	8.61494	8.47985	7.50206	7.80921	7.9021	7.29421	7.56991	7.58635	8.53496	8.58308	8.51396	8.73052	8.85549	8.99219	8.25995
4930404N11Rik	5.96802	5.89133	5.92982	5.71158	5.71366	5.76967	5.62698	5.77417	5.90386	5.69913	5.66404	5.75412	5.94775	6.19806	6.26296	6.0881	6.15903	6.107	5.91164	5.97542	5.73026	5.86943	5.81914	5.85035	6.0319	5.90024	6.2527	5.87024	5.83295	5.73691	5.79886	5.7975	5.81394	5.7832	5.96631	5.87817	5.86416	5.97003	6.19443	5.89307	5.89583	5.84771	5.65029	5.83921	5.76416	5.71554	5.86741	5.91369	5.87288
4930412D23Rik	5.91676	5.59349	5.79042	5.66111	6.01015	6.1749	5.51438	5.5533	5.44371	5.55688	5.46375	5.57915	5.5311	5.37329	5.28226	5.41815	5.41722	5.44897	5.49269	5.81889	5.67023	5.77113	5.56214	5.62988	5.7867	5.86749	5.71354	5.81556	5.71034	5.63123	5.59052	5.51337	5.68043	5.74015	5.50205	5.54558	5.57001	5.46538	5.58104	5.53834	5.382	5.42473	5.7556	5.70415	5.62588	5.72266	5.58695	5.59768	5.89643
4930412M03Rik	5.71035	5.66828	5.82388	5.63091	5.72837	5.95497	5.92887	6.08366	5.8938	5.90031	5.87721	6.12305	5.78567	5.79383	5.94649	5.39763	5.6865	5.6197	5.55112	5.85206	6.08602	5.46867	6.3825	6.04545	5.56296	5.77553	6.12893	5.69641	5.95951	5.75411	5.9255	5.84343	5.82297	5.99966	5.86256	5.88142	5.47955	5.72535	5.74085	5.72626	5.8362	5.83403	6.32522	6.05586	5.81806	6.28012	5.8382	6.13752	5.72915
4930412O13Rik	5.40715	5.395	6.0676	5.75137	5.43584	5.90408	5.05023	4.97016	5.38032	5.02538	5.01675	5.25272	5.32866	5.28014	5.6525	5.05022	5.11846	5.19949	5.12986	5.15361	5.1794	5.44366	5.04754	5.04417	5.966	5.61532	6.15656	4.99435	5.18779	5.36332	5.00884	5.19318	5.03784	5.07779	5.13337	5.04264	6.16169	6.19674	6.15628	5.06612	5.20852	5.21988	5.10209	5.0887	5.10758	5.16702	5.04514	5.16359	5.95351
4930417G10Rik	5.19814	5.10243	5.31029	5.2428	5.24773	5.44254	5.19578	5.19859	5.38886	5.31773	5.38555	5.29064	5.32709	5.24649	5.28003	5.18097	5.07492	5.17597	5.35934	5.52869	5.60906	5.69174	5.18262	5.3163	5.09525	5.31408	5.4069	5.2977	5.04783	5.30291	5.27374	5.39458	5.28648	5.53287	5.45351	5.22241	5.66176	5.49809	5.23113	5.50853	5.24815	5.3805	5.36408	5.16171	5.36055	5.53433	5.64232	5.285	5.51388
4930417M19Rik	5.06142	5.08759	5.09464	5.00737	5.07582	5.07199	5.15628	5.32696	5.33023	5.4675	5.2264	5.11462	5.27093	5.75983	5.60343	5.27967	5.45444	5.43763	5.43561	5.22438	5.78181	5.15017	5.33664	5.20599	5.13567	5.0852	5.2073	5.28071	4.98754	5.28769	5.55767	5.37083	5.23626	5.54273	5.08941	5.26355	5.92181	5.59118	5.63088	5.83418	5.81759	5.52122	5.71478	5.65233	5.53868	5.53116	5.50886	5.70481	5.17402
4930417O22Rik	5.75568	5.85309	6.07458	5.71126	5.84137	6.23927	5.71848	5.64087	5.56735	5.68921	5.67751	5.71009	5.90237	5.67064	5.74171	5.75516	5.78917	5.82756	5.78315	5.8722	5.72137	5.90798	5.76762	5.68101	5.97695	5.82266	6.17442	6.07221	5.76007	5.94833	5.53639	5.66287	5.70561	5.77375	5.62926	5.59498	5.78387	5.64339	5.69394	5.87044	5.73092	5.6864	5.81023	5.42375	5.8464	5.72407	5.82679	5.62509	5.83968
4930420K17Rik	8.64832	7.58264	8.14081	8.2818	7.09762	7.92966	6.81729	6.05331	6.77548	6.45031	6.4503	7.28579	8.2066	7.88304	7.41355	7.34277	8.34929	8.42159	6.56899	5.74518	7.12227	7.27818	6.83081	7.05232	8.3456	8.79782	8.69692	8.46044	7.87037	8.00313	6.74336	7.16216	6.80838	7.16771	6.61206	6.85825	8.86142	8.69391	8.89731	8.15101	8.16587	7.5794	6.39222	6.95004	7.36049	8.01999	7.56942	7.45369	8.35223
4930422G04Rik	7.15674	7.11453	6.70234	6.92005	5.95722	7.09134	7.32274	7.06005	7.08525	6.95632	7.71601	7.41573	7.8385	7.87033	8.11763	7.30245	7.77912	7.99065	5.56277	5.77281	5.53963	5.75632	6.14182	6.39473	6.74096	6.76914	6.35152	6.96128	6.8888	7.03083	6.62527	6.84376	6.15177	7.41379	7.05443	7.18195	8.61758	8.66424	8.48162	8.26049	8.41372	7.97066	6.71465	6.8673	6.78877	6.2696	6.19657	5.63237	6.83928
4930422G04Rik	7.08016	7.29424	7.15559	6.78842	7.30646	6.32163	7.44426	7.25906	7.34133	7.28297	6.65573	7.98896	7.26111	8.37833	8.37333	8.13159	8.3414	8.41171	6.49351	6.14227	6.34679	6.26699	6.10364	6.05548	6.61375	6.59775	6.7974	6.90003	7.30298	7.1165	7.68938	6.80824	6.97668	6.30606	7.29283	7.55695	8.45643	8.45059	8.47549	7.77977	8.24414	7.80678	7.2442	6.45297	6.23518	6.30833	6.17064	6.39783	5.86527
4930422G04Rik	8.03686	8.12969	7.78074	7.88653	7.0395	7.96477	8.14155	8.04371	8.00748	8.27551	8.14773	8.20217	8.84095	8.99636	9.17044	8.98515	8.7764	8.80867	7.14388	6.9984	7.13695	6.26225	7.33914	6.76286	7.87366	7.36865	7.47543	8.2671	8.27952	7.9676	7.74435	7.91364	8.28728	8.26388	8.44295	8.1351	9.45941	9.37947	9.02469	8.98792	9.31978	9.19546	8.03886	7.62943	7.4937	7.17304	7.17845	7.03983	7.00986
4930422I07Rik	7.20056	7.20905	7.78381	7.65416	7.60953	6.86948	6.58068	5.63934	6.22735	6.73022	5.54855	5.99889	5.04977	6.44439	6.0164	6.44003	6.47282	6.46068	8.16794	8.22455	8.09157	6.03619	6.75258	6.68998	7.91892	7.00883	6.36956	7.40521	7.8514	7.36741	6.67612	6.53952	6.73405	6.49966	6.21524	7.5617	5.4177	5.20732	6.10621	6.04945	5.73852	6.06752	8.17769	6.60123	6.53107	8.09091	7.42079	7.93137	8.15014
4930427A07Rik	5.59214	5.54998	5.67594	5.5926	5.47832	5.58019	5.56499	5.48563	5.50418	5.44067	5.53601	5.46847	6.20435	6.36199	6.6721	6.20368	6.15463	6.16291	5.39889	5.46016	5.59473	5.50994	5.40292	5.54822	5.54542	5.55367	5.77409	5.44623	5.58692	5.56837	5.40242	5.33935	5.4451	5.47928	5.54916	5.3382	5.94576	5.82762	5.54896	6.18812	5.86998	5.88003	5.54689	5.42266	5.34737	5.34791	5.53203	5.49653	5.53708
4930430F08Rik	7.3979	7.74176	7.79012	8.01119	8.34258	7.72555	6.99765	7.6824	7.51009	7.77179	8.03448	7.3994	8.50077	8.44724	8.31933	8.07285	8.85586	8.63564	8.40926	8.5883	8.51047	8.73187	8.26893	8.30494	7.9179	8.02127	8.00735	7.32388	7.62808	7.7733	7.16301	7.75215	7.64009	7.5024	7.31624	8.08664	8.74761	7.96606	7.20063	7.99001	8.20734	7.89241	8.70883	8.36409	8.52475	8.41767	7.63113	7.75351	8.29192
4930432K21Rik	4.93406	4.97139	5.11872	4.96633	4.89119	4.99817	5.15525	5.078	5.42814	5.21341	5.30298	4.82476	5.88652	6.30571	5.51334	5.88253	6.17854	6.10499	5.2852	5.1356	5.12808	5.14914	5.09838	5.17904	4.89519	4.88386	5.11216	5.11911	4.99058	5.11096	5.04796	5.11455	5.028	5.03746	5.22979	5.07213	5.96337	6.73782	6.1464	5.82933	5.93074	6.11067	5.23448	5.08749	5.01662	5.14748	5.38205	5.14551	5.11758
4930432O21Rik	6.92895	6.8922	6.74498	7.22862	7.06647	7.93446	6.92213	7.14845	6.75064	6.80381	7.85618	6.7598	6.27658	6.64815	6.87933	6.76183	6.72864	6.87303	6.64082	7.34788	6.70104	6.56649	6.96715	6.69456	7.16915	7.41429	7.06276	7.0674	6.82081	6.63521	6.80874	7.1536	6.38996	6.95799	7.00268	6.63124	6.82479	6.71188	6.68618	6.9962	6.99602	7.05163	6.70796	7.06727	6.45794	7.14215	6.81018	6.90651	7.13884
4930451I11Rik	6.13491	5.86193	6.0851	5.95192	6.20666	5.81951	5.9111	6.03178	5.93297	5.97521	5.78325	5.95479	5.95484	5.91137	6.02999	5.88479	5.89833	6.00471	6.02172	6.13396	5.98832	6.14923	6.00651	5.96975	6.02845	6.35905	6.0228	6.07329	6.04351	5.96651	5.94159	5.93851	5.96712	6.08015	5.89521	5.94918	6.08974	5.88772	6.01671	5.82074	5.93059	6.11258	5.99917	6.00398	5.91742	5.8641	6.06028	6.07691	6.13004
4930452B06Rik	6.32135	6.46567	6.45639	6.47622	6.52966	6.27923	5.8284	6.11973	6.15589	5.86491	6.04973	6.04429	7.46583	7.85138	7.98176	7.94984	8.37409	8.19129	5.88978	5.59985	5.73359	6.07828	5.8033	6.23125	6.30803	6.14288	6.15201	6.30077	6.46131	6.50005	5.91377	6.04761	5.75385	5.97365	5.86946	6.18016	7.54441	7.93997	7.57047	7.88105	7.91683	7.67106	6.45336	6.0363	6.15958	5.75022	5.89832	5.64574	6.41417
4930453N24Rik	8.04861	8.14756	8.08096	8.30466	6.5234	7.98637	8.4615	8.28894	8.4973	8.69759	8.20921	8.15691	8.82837	8.73118	8.79374	8.25987	8.71564	8.52867	8.43934	8.06419	8.28671	7.19744	8.66418	7.9569	8.43765	8.84861	8.37477	8.15819	8.11578	8.22832	8.10305	8.61022	8.7481	7.74385	8.0361	8.44969	8.8727	8.59084	8.72809	8.82981	8.86883	9.0769	7.67758	7.89906	8.46045	8.42166	8.48551	8.36736	8.27842
4930455C21Rik	6.51945	6.81124	6.48415	6.31199	6.45354	6.60022	6.81489	7.33188	7.08028	6.71999	6.77346	6.47399	7.43486	7.32699	7.27412	7.39267	7.49772	7.17166	7.70335	6.89993	7.0845	8.07059	7.09042	6.71904	6.90027	6.55349	6.88212	6.81348	6.72209	6.62622	6.75677	7.19106	7.08722	6.99856	6.93325	7.32264	7.06846	7.74904	7.07338	7.35271	7.63935	7.42988	6.84219	7.30036	7.36279	7.10682	7.24564	6.86915	6.64533
4930455F23Rik	7.92586	7.45463	7.62684	7.47468	6.90919	6.87957	8.0765	8.57495	8.87282	8.31417	8.05968	8.90093	9.26569	8.92882	9.17006	8.81579	9.14706	9.05602	9.00045	9.32598	9.08922	8.51948	8.7391	9.02782	7.28607	6.89168	7.82209	7.77641	7.64857	8.12917	8.61215	8.31254	8.03319	8.37582	8.54712	8.12233	9.3489	9.21053	9.15366	9.41137	9.39691	8.88714	8.52496	8.76565	8.72072	9.60959	9.78448	9.36922	7.26559
4930471M23Rik	5.87862	5.65219	5.74997	5.76814	6.06119	6.06482	5.83032	5.63946	5.83674	5.84312	5.89877	5.65696	6.42191	6.00482	6.34757	6.14966	6.26673	6.24052	5.92818	5.86734	5.94396	6.01958	5.88105	5.9791	5.7496	5.82839	6.29236	5.72432	5.97727	5.9141	6.20267	5.97418	6.06623	5.73057	5.99845	5.80351	5.81841	5.88293	6.08937	6.28809	6.41983	5.91653	5.82973	6.02303	5.58735	6.24256	5.68356	5.92232	5.90628
4930473A06Rik	5.10676	4.95909	5.0911	4.99636	5.07145	4.99755	5.59627	5.69479	5.47392	6.1464	5.68813	5.4423	5.59249	5.67311	5.83398	5.55323	5.61652	5.81724	6.10722	5.75055	6.19396	5.6592	5.95541	6.00118	5.28644	5.22051	5.22154	5.27473	5.19764	5.24076	6.35253	6.22375	5.50355	6.19048	5.81573	6.19861	5.9296	6.21542	5.65392	5.93216	5.77133	5.75719	7.29378	6.79043	6.99616	6.31402	5.91722	6.96916	5.35349
4930474M22Rik	5.26464	5.25931	5.15957	5.18255	5.28562	5.43679	5.34856	5.43161	5.25638	5.48476	5.71916	5.26593	5.31459	5.14472	5.36145	5.35692	5.25241	5.19887	5.27423	5.28721	5.22756	5.60801	5.66883	5.56464	5.16836	5.3016	5.26734	6.23771	6.03215	5.66648	5.2273	5.09719	5.54862	5.91709	5.6928	6.63965	5.36012	5.3188	5.14527	5.21239	5.0992	5.28163	5.7561	5.39839	5.53841	5.34443	5.3256	5.27617	5.3928
4930479M11Rik	5.43085	5.21062	5.36591	5.34481	5.35178	5.17762	5.21399	5.35602	5.20536	5.19797	5.24705	5.46265	5.31949	5.36323	5.55624	5.60079	5.45054	5.37466	5.67999	5.30496	5.29214	5.42561	5.37628	5.33379	5.32359	5.06243	5.38026	5.77141	5.61784	5.83824	5.15535	5.54659	5.3142	5.28416	5.85586	5.5565	5.29809	5.32307	5.3503	5.48018	5.25359	5.31024	5.60571	5.46445	5.50194	7.04756	5.39681	6.19983	5.27361
4930485B16Rik	5.04484	5.07666	5.10134	5.08933	5.34144	5.14733	5.01321	4.87213	4.95221	4.84915	4.85769	5.15273	4.98212	4.93719	4.94207	4.94481	4.94537	5.05729	5.1149	5.06012	5.12685	5.06816	4.95931	5.05005	5.19948	5.09405	5.14005	5.23092	5.10538	5.0751	5.97685	5.33949	4.87613	4.77212	4.77945	4.8636	5.0502	5.05121	4.93842	4.84836	5.01791	5.15519	5.02135	4.89392	4.91115	5.31457	5.27884	5.64668	5.19932
4930486L24Rik	4.96904	4.98611	5.14756	4.9562	5.36974	4.95105	4.86895	4.78701	4.82617	4.80167	4.85767	4.83528	4.86628	4.84222	5.0417	4.80687	4.84894	4.80336	4.84405	4.87153	4.85903	4.92872	4.83568	4.84185	5.13179	4.97049	5.01462	5.25594	4.95319	5.08014	4.77805	4.76292	4.72561	4.87574	5.11695	4.82824	4.91856	4.83535	4.78994	4.93668	4.86556	4.86857	5.06921	5.29885	5.13213	4.74868	4.87776	4.87433	5.3534
4930503L19Rik	8.71098	8.88143	9.11147	9.07586	8.67572	9.20442	8.18097	7.74485	8.48228	7.844	8.35417	7.75319	8.13802	7.50252	7.86368	7.64017	7.96954	7.76732	6.51692	6.87183	6.86163	6.16864	6.3591	6.52589	8.4909	9.02654	8.59317	8.59575	8.54469	8.62095	7.75499	7.76799	8.37828	7.92876	8.40532	8.12401	8.16465	7.70968	7.41356	7.56094	7.60566	7.73371	6.46414	6.10234	6.35186	6.6001	7.47634	6.65595	8.83902
4930504O13Rik	5.70016	5.67369	5.53244	5.79575	6.14252	5.64014	5.59254	5.69211	5.49066	5.56814	5.46942	5.38964	5.62662	5.58092	5.84788	5.95696	5.8192	6.01119	5.86297	5.72226	5.70492	5.86504	5.58288	5.6212	5.73053	5.62616	6.08616	5.64363	5.5887	5.66176	5.5341	5.31505	5.41057	5.65575	5.37082	5.53127	5.82795	5.63317	6.02428	5.60661	5.84626	5.93083	5.55374	5.25464	5.20104	5.68613	5.62666	5.54111	5.7887
4930506M07Rik	5.74773	5.46157	5.68123	5.75292	5.69072	5.55594	5.67507	5.47656	5.33791	5.99097	5.97064	5.5584	5.44769	6.74421	6.4776	6.67904	6.3229	6.19414	7.05007	7.13111	7.22828	6.7043	7.35413	7.45579	5.84889	6.14386	5.89058	5.89753	5.38854	5.6447	6.64512	6.83772	6.04636	7.08961	6.54772	6.2746	7.67976	8.33017	7.97769	8.31684	8.67394	8.03954	8.77644	8.64357	8.55986	8.92982	9.25527	8.70821	5.95029
4930517O19Rik	6.00976	5.94338	5.87447	5.556	5.79348	5.67192	5.65291	5.53203	5.54211	5.64092	5.54692	5.5969	5.73947	5.4901	5.59818	5.47606	5.50357	5.49437	5.83321	5.47631	5.51837	5.55364	5.44708	5.63372	5.98726	5.48312	5.45506	5.75399	6.16262	5.84983	5.58798	5.64517	5.44481	5.91863	5.53954	5.89417	5.43891	5.60195	5.5803	5.60839	5.41553	5.63385	5.66597	5.60739	5.55679	5.57057	5.63286	5.49353	5.74004
4930518I15Rik	7.18032	7.7125	7.49802	6.43672	6.22769	7.33348	8.12898	8.32984	8.47225	8.14815	7.87783	7.09604	7.56677	7.81174	8.74744	7.2448	8.36387	8.32771	8.63054	8.99433	9.15209	6.9411	8.01506	6.66363	7.67105	7.85797	7.99972	7.02273	7.65453	7.49526	7.53051	7.5092	8.04083	7.54845	8.95762	7.7733	8.20383	8.3833	7.87658	8.35014	8.44405	7.82913	8.31355	7.2127	7.97948	9.82926	8.60208	8.36403	7.98777
4930520O04Rik	5.61664	5.6282	5.64771	5.77547	5.74869	5.42034	5.45534	5.44598	5.72076	5.82928	5.37959	5.62169	5.88085	5.47956	5.44341	5.50344	5.99532	5.68266	5.48904	5.55224	5.34057	5.4107	5.68879	5.42042	5.69538	5.57273	5.20866	5.71548	5.34886	5.50928	5.94421	5.73643	5.56015	5.71271	5.61686	5.26639	5.70472	5.62331	5.58306	5.51686	5.50277	5.49866	5.68791	5.8372	5.55001	5.55819	5.70972	6.41335	5.6492
4930523C07Rik	5.69571	5.50333	5.60752	5.58818	5.59873	5.65988	5.53016	5.6482	5.75427	5.70654	5.69849	5.5019	5.42718	5.53006	5.55053	5.59758	5.65674	5.55494	5.62957	5.65415	5.54751	5.71987	5.63271	5.89423	5.65137	5.94211	5.85836	5.87711	5.48381	6.0355	6.05881	6.05617	6.26882	5.63751	5.7166	5.39883	5.56597	5.63016	5.63925	5.35723	5.7437	5.61371	5.55773	5.53781	5.77593	6.3347	6.15752	6.38678	5.6818
4930524B15Rik	5.24493	5.25826	5.14157	5.16512	5.28814	5.49316	5.07796	5.15598	5.04732	5.07131	5.19434	5.05452	5.24286	5.25487	5.26165	5.27604	5.20393	5.06267	5.2848	5.32286	5.47656	5.63093	5.29773	5.32017	5.23427	5.35568	5.5497	5.24721	5.0512	5.20297	5.09809	5.20655	5.12034	5.24331	5.12769	4.99652	5.44811	5.18937	5.25087	5.331	5.20194	5.19871	5.31932	5.08492	5.30336	5.3369	5.15667	5.2756	5.28313
4930524J08Rik	8.35259	8.23385	8.28501	8.19652	8.18722	8.86415	9.14755	9.46978	8.86438	9.48443	9.80653	9.43421	8.04241	7.46399	7.82379	8.13732	8.18852	8.13636	9.92345	10.2138	9.73115	9.82584	9.26026	9.46081	8.09459	8.49748	7.59612	7.87638	8.05497	7.84066	9.39897	9.69722	8.79885	8.06859	8.97958	8.65614	7.67904	7.61128	7.59228	7.74365	7.74963	7.5394	8.38333	8.3728	8.21417	9.82031	10.6024	10.1259	8.49185
4930527J03Rik	6.20899	6.16996	6.23852	6.2077	6.31505	6.34286	6.25739	6.25034	6.31404	6.28345	6.1765	6.23096	6.19288	6.24927	6.24026	6.31467	6.18888	6.23956	6.26849	6.28308	6.18832	6.14207	6.30938	6.16613	6.36962	6.27155	6.4917	6.34738	6.24962	6.35021	6.20954	6.26675	6.16098	6.30414	6.21037	6.19313	6.2149	6.30819	6.21366	6.29547	6.23849	6.23129	6.0713	6.07712	5.98521	6.20968	6.19331	6.2047	6.23389
4930528F23Rik	5.15882	5.18194	5.1656	5.18233	5.50217	5.40838	5.01324	5.11318	5.12603	5.16655	5.14359	5.23561	5.73766	5.99357	6.21326	5.90728	5.65587	5.54188	5.03899	5.03702	5.05484	5.19746	5.07435	5.18171	5.36055	5.36847	5.22364	5.27964	5.1762	5.22618	5.22819	5.02306	5.20575	5.1694	5.00675	5.04961	8.24464	8.50489	7.18206	6.33931	5.91933	5.53519	5.23393	5.17292	5.25086	5.0354	5.00371	4.93787	5.61934
4930529M08Rik	4.85225	4.7905	4.81032	4.86709	5.0028	4.92436	4.79927	4.76161	4.82353	4.82863	4.77258	4.77151	4.93613	4.88591	4.80427	6.02744	4.88509	4.95106	4.86038	5.02779	4.88475	4.89363	4.87561	4.87494	4.75022	4.86757	4.89224	4.98069	4.8468	4.83614	4.87966	4.77466	4.78874	4.91913	5.07707	4.89961	4.99962	5.02853	4.96232	4.82825	5.35956	5.27534	4.90359	4.93748	5.20634	4.8377	4.84395	4.93255	5.40852
4930534B04Rik	7.96121	7.76146	8.19593	7.6664	7.14309	6.9977	7.18494	7.33237	7.69141	7.34415	7.25861	7.75505	7.33921	7.39611	7.65942	7.44179	7.38781	7.71159	6.19082	6.58496	6.4924	6.65315	6.52912	6.8561	7.39033	7.50025	7.05823	7.36292	7.82084	8.15104	7.14288	7.11644	7.10786	7.69132	7.33435	7.53534	7.50547	7.7581	7.17773	7.555	7.56916	7.77279	7.32075	7.25891	7.11929	5.98492	5.69643	5.88037	7.43925
4930544O15Rik	4.88725	5.00613	4.69614	4.74256	5.08074	4.91704	5.04562	5.01472	4.78688	4.79668	4.66639	4.73095	4.92519	4.82505	4.78183	4.82065	4.90564	4.71765	6.11716	5.65352	5.31989	4.7787	6.00182	4.89535	4.96248	4.71684	4.82299	4.91397	4.88037	4.81079	5.04329	4.75214	4.79859	4.7254	4.71289	4.69422	4.87461	5.12062	4.87063	5.05344	5.15063	5.2001	4.75879	5.44744	4.76842	4.88787	6.18552	6.06122	4.7094
4930547M16Rik	6.43947	6.60275	6.51277	6.49788	6.3219	6.41847	6.42271	6.46505	6.44138	6.45617	6.52122	6.31805	6.49024	6.53549	6.53682	6.44314	6.50314	6.45657	6.56818	6.5502	6.78561	6.66475	6.58695	6.63388	6.44087	6.67527	6.74917	6.66245	6.47813	6.54388	6.47237	6.45952	6.44102	6.5415	6.3836	6.38684	6.46309	6.47536	6.54609	6.50188	6.59036	6.55527	6.46929	6.35342	6.40289	6.5994	6.48068	6.61829	6.69307
4930547N16Rik	7.16842	6.89435	7.05058	7.3921	7.42517	6.7178	6.63075	6.97781	7.01073	6.72839	6.94101	6.85081	6.88706	7.16691	7.73342	6.81029	7.05235	7.58878	6.22152	5.65132	5.3825	5.99682	5.7164	5.84887	6.76614	6.51448	6.26868	6.88121	6.97305	6.6163	7.0484	6.60841	6.60867	6.46208	7.34029	7.15316	7.55653	7.92876	7.78201	7.36435	7.72648	7.5844	6.77955	6.77788	6.90288	5.13342	5.26505	5.18188	6.62191
4930550C14Rik	4.9137	5.02217	4.92975	5.07718	4.92509	4.96193	5.10445	5.08001	4.94543	4.99416	5.07049	5.15315	4.93245	4.83801	4.91574	4.84267	5.0679	4.94457	5.60825	5.36689	5.40502	5.24395	5.01861	4.89274	5.10268	4.99804	4.98411	5.1607	4.96967	5.05579	5.41801	5.19304	5.07955	5.50946	5.52717	5.27055	4.96249	4.9383	4.94789	5.02437	4.83557	5.04979	4.90284	4.93796	5.18097	7.0652	7.29099	5.95347	5.15896
4930550L24Rik	5.21557	5.29213	5.27365	5.1883	5.32263	5.33571	5.0851	5.16344	5.08258	5.22543	5.21464	5.21834	7.60436	7.06099	6.75082	6.38358	7.09519	6.68923	5.23786	5.28924	5.3263	5.24933	5.50417	5.2054	5.25222	5.32188	5.23168	5.2295	5.20804	5.19677	5.27735	5.12768	5.14836	5.88441	5.35774	5.18208	6.91218	7.1092	7.23264	7.36565	6.84071	6.49598	5.55639	5.56933	5.69811	5.18697	5.22597	5.16377	5.25895
4930564C03Rik	5.43581	5.69911	5.59471	5.32066	5.49706	5.60023	5.47109	6.21733	5.31723	5.49606	5.45485	5.35693	5.46928	5.6402	5.41152	5.641	5.73423	5.67061	6.871	5.53108	5.79328	5.40838	5.67158	5.70441	5.43058	5.56519	5.6201	5.46552	5.5937	5.48198	6.00502	5.53582	5.28792	6.01631	5.7798	5.43322	5.67754	5.59295	5.74703	5.55674	5.70914	5.799	6.43882	5.26956	5.50221	5.87693	5.62049	5.6407	5.58088
4930565B19Rik	6.01422	5.95492	6.2209	5.96529	6.37562	6.15613	6.06304	6.198	6.05998	6.07904	6.08388	6.08146	6.1049	5.74342	5.98522	5.88215	6.23585	6.33961	5.98726	6.37137	6.07655	6.19932	5.97573	6.05554	6.21821	6.1217	6.02841	6.00509	6.07791	5.98826	5.97903	6.04482	6.1238	6.53445	5.95294	6.3062	6.02239	6.10013	6.14522	6.01915	6.26572	6.06777	6.08361	5.9705	5.8779	6.305	6.51679	6.13963	6.29515
4930578C19Rik	5.70157	5.69122	5.57473	5.76695	5.91648	5.31201	5.17111	4.89229	4.89743	4.93091	4.90895	4.88041	5.13238	4.91275	5.08798	4.91071	4.97115	4.92016	5.18675	5.00129	5.01554	5.11648	4.97087	4.99861	5.73587	6.32382	5.75305	5.70343	5.63558	6.22343	4.86542	4.90024	4.83909	4.87301	4.78314	4.81292	4.97479	4.86898	4.95699	4.92807	5.0802	5.054	4.96246	5.07185	4.96127	4.87765	4.94014	4.90012	5.41144
4930578G10Rik	4.92739	5.19158	5.19661	5.0277	5.22394	5.28289	6.68156	8.11029	6.11969	7.88472	8.76362	5.10933	5.34999	5.19989	5.79917	5.05359	5.15896	5.306	5.41816	5.39307	5.22384	5.4215	5.15805	5.25737	5.16721	5.37309	5.22703	5.30987	4.95932	5.14001	5.65803	6.40755	5.18261	9.30468	6.40021	6.61134	5.2906	5.62794	5.32242	5.19711	5.24306	5.14955	5.34752	4.94495	4.93482	5.34846	5.21895	5.53294	4.93691
4930578N16Rik	6.30843	6.28502	6.50364	6.3039	6.44135	6.42769	6.65055	6.70344	7.6378	6.7633	6.74405	6.46051	6.07442	6.0394	5.85345	6.25508	6.67402	6.04021	8.17303	7.91476	7.70442	6.50086	7.00612	7.54557	6.05318	6.26548	6.22898	6.15309	6.09142	6.30603	6.65137	7.49653	6.38001	6.56125	6.5922	6.76552	6.16053	6.19215	5.64903	6.27787	6.34056	6.04523	7.04645	6.33923	6.50238	7.6759	7.13824	7.45332	6.41136
4930579G18Rik	7.87342	7.19718	6.48532	7.48837	6.13676	6.87446	7.27427	7.57043	7.19928	7.15795	6.83222	7.23293	6.52702	6.9007	7.19645	6.8157	7.28153	7.28964	7.04609	6.59992	6.7785	6.62992	7.39132	7.18261	7.62631	7.1329	7.82454	7.58637	6.98176	7.24777	7.37945	7.2106	6.28418	7.15823	7.1962	7.25104	7.2188	7.13611	7.34235	7.2611	7.17595	7.4373	7.38701	6.78663	6.75624	7.12411	6.49124	6.95136	7.10098
4930579G22Rik	5.92917	5.87487	6.26502	6.09361	5.98896	7.01203	5.85108	5.8377	6.04933	6.32589	6.04317	5.67911	5.99921	5.84712	5.93547	5.85681	6.18906	6.06372	6.49874	6.2002	6.84313	6.59741	6.79697	6.68356	6.00864	6.17212	6.21644	6.3432	6.17478	6.21728	5.80063	6.02357	5.81703	5.88412	6.03268	5.83793	6.13018	5.73214	6.07126	5.73753	5.94739	6.08665	6.76353	6.25585	6.46542	6.47794	7.66939	6.32135	6.4203
4930579G24Rik	5.11455	5.17395	5.27504	5.21494	5.19481	5.3008	5.57911	5.41967	5.31967	5.62842	5.54227	5.57212	6.41031	5.91063	5.95451	6.53245	5.91938	5.5757	5.18348	5.16832	4.98057	5.17162	5.13462	5.00207	5.17563	5.18478	5.19757	5.03791	5.53456	5.22813	5.1077	5.41027	5.25795	5.37779	5.36414	5.41734	5.96673	5.80375	5.78521	6.12983	5.99717	6.20167	4.91304	5.57071	5.2739	5.00684	5.57471	4.75977	5.03996
4930583H14Rik	5.27069	5.30574	5.26529	5.13766	5.15867	5.16078	5.24493	5.19011	5.16431	5.14708	5.29705	5.14927	5.37081	5.16988	5.22311	5.21815	5.15137	5.13615	5.23489	5.30678	5.33974	5.33169	5.46338	5.38961	5.19808	5.25826	5.17864	5.58431	5.40248	5.44609	5.26218	5.18474	5.10951	5.29278	5.3075	5.22676	5.29858	5.16193	5.11139	5.27573	5.08492	5.12522	5.25652	5.25398	5.22978	5.10865	5.22678	5.02637	5.26445
4930588K23Rik	6.05186	6.06261	6.09654	6.09638	6.3728	6.22017	6.19465	6.00874	6.03886	5.94207	5.96571	6.07106	6.18709	6.07557	6.20432	6.22159	6.15431	6.24537	6.31267	6.19794	6.1219	6.35406	6.25948	6.04991	6.38647	6.51677	6.3318	6.28053	6.01904	6.19566	6.08249	6.08865	6.02738	6.17044	6.04438	6.13367	6.22993	6.20357	6.18069	6.27226	6.11846	6.22855	6.21291	6.06565	6.05758	6.06784	6.37768	6.04407	6.42434
4931406C07Rik	7.76327	7.67599	7.77754	8.08961	7.83944	7.2902	7.51295	7.86293	7.65646	7.75741	7.65345	7.67475	6.48748	7.01536	6.28767	6.27861	6.79281	6.41056	7.36724	7.81957	7.8592	7.23183	7.70476	7.59908	7.61036	7.99367	7.242	7.39144	7.4126	7.6201	8.1859	7.82916	7.94869	7.55289	7.53597	7.49171	6.8081	7.2957	6.61731	6.49048	6.50492	6.51657	7.75112	8.15148	7.82241	8.28942	7.48711	8.56881	7.71519
4931406H21Rik	6.67261	6.21301	6.85405	6.06291	6.57781	6.38097	6.72822	6.37053	6.25411	6.46558	6.661	6.33708	5.90636	5.77455	5.84313	6.07104	5.99456	5.7188	6.40584	6.47383	6.66532	6.16961	6.53308	6.35183	6.81611	6.49421	7.10599	6.54814	6.61789	6.59199	6.38589	6.29159	6.93437	6.68039	6.43461	6.32069	5.95848	5.71101	5.8216	6.17674	5.86618	6.25748	6.76281	6.17189	6.33239	6.69212	5.7972	6.3682	6.50607
4931406P16Rik	9.3498	9.09695	9.24642	9.07407	7.93267	9.13447	8.00719	8.2111	8.08671	8.1341	8.56809	8.44778	8.33057	8.08517	8.19012	8.31076	8.20882	8.07516	7.82026	7.75471	8.21545	8.53815	9.2351	8.87805	9.19894	9.26784	8.70165	8.99802	9.25838	9.4287	8.03366	7.82954	8.12437	8.63727	8.41107	8.47518	8.44983	8.6584	8.518	8.47818	8.42717	8.61842	9.15159	9.81398	9.61897	8.28457	7.8967	8.12048	9.2444
4931440P22Rik	5.89012	5.94092	5.88224	5.80155	5.49861	6.05123	5.99116	5.65075	5.80365	5.80659	5.81912	5.73276	5.53582	5.96845	5.648	5.89534	6.10244	5.82048	6.29057	5.99894	6.20294	5.7283	5.71405	5.98097	5.78099	5.6544	5.93922	5.7671	5.61845	5.78033	5.64755	5.66767	5.66618	5.83039	5.77403	5.75525	5.89785	5.84863	5.64393	5.6535	5.74793	5.77116	5.6588	5.65557	5.61852	5.85246	5.93464	6.02132	5.81169
4932422M17Rik	6.52003	6.28656	5.74827	5.883	6.41938	6.487	7.11723	6.73184	6.71425	6.6797	6.64879	6.58856	6.61836	6.46697	6.43365	6.83143	6.48203	6.53009	8.42234	8.19518	8.56115	7.30397	7.58671	7.71502	6.41108	6.17652	6.94846	6.572	6.20982	6.18462	7.70015	7.00207	7.0715	6.55571	7.20191	6.71556	6.09975	6.27078	6.18866	6.32192	6.48429	6.59624	6.87083	6.39419	6.83528	8.20889	8.19962	7.79206	6.62756
4932438A13Rik	9.15337	9.45279	9.18074	9.03925	9.18292	8.55609	9.38972	8.41828	8.26423	8.24197	7.33671	9.14993	7.73439	8.61919	8.31243	8.10338	8.00397	8.54717	9.11734	8.67397	8.60772	7.22383	8.08491	7.16533	9.2537	9.28647	8.78739	8.66461	9.07769	9.40903	8.82752	8.91939	8.00745	8.07268	8.34938	8.92206	9.04059	9.42719	9.31874	8.47155	8.59324	9.04294	8.61147	7.72816	8.6036	8.33367	9.26538	9.06835	8.07315
4932438A13Rik	10.8264	10.7738	10.9791	10.3989	10.0848	7.87643	10.9953	10.7472	9.92441	10.1367	9.84549	10.624	9.48352	9.77567	9.92585	9.65082	9.49136	10.1175	8.3964	10.2232	10.4574	8.56145	10.2851	8.93176	10.9575	10.4273	11.8506	10.3107	10.6335	10.9059	10.6347	10.7002	11.6166	9.71488	10.3764	9.83046	10.3981	10.8526	10.9463	9.98441	9.89878	10.3714	9.83512	8.78767	9.55954	10.0798	9.89437	10.6258	9.33514
4932438A13Rik	8.03453	7.50174	7.34221	7.73085	6.01099	6.4579	7.4751	6.18275	6.34817	6.49913	6.38332	6.85685	6.48305	6.93934	6.43156	6.25765	6.33254	6.50142	6.53006	6.67872	6.39311	6.25204	6.35499	5.73559	7.73825	7.6311	6.26475	6.32386	7.35661	7.65535	7.0248	7.00688	5.92796	7.14581	6.73421	7.49605	6.8919	7.95145	8.32621	7.14641	7.16057	7.38708	6.44397	6.27635	6.98481	7.62978	7.75824	7.53252	8.31184
4932438A13Rik	9.55842	9.21884	9.32159	9.30956	8.34061	9.03387	9.08633	8.91729	8.58029	8.94284	9.0261	9.21533	8.90642	9.05064	9.02254	9.05866	9.03131	9.26938	8.51599	8.66784	8.94021	8.78278	8.23954	8.60261	9.57805	9.41233	9.02613	9.37467	9.41296	9.38999	9.20721	8.88989	8.80414	8.84807	9.0608	9.13782	9.97192	9.96463	9.93355	9.33662	9.41591	9.36072	8.87492	8.76105	8.62897	9.03276	8.75042	8.78492	8.8696
4932438A13Rik	6.9966	7.51114	6.69766	6.79186	5.52827	5.92672	6.71711	5.8141	6.29086	6.25014	6.21208	6.98096	6.66824	7.10691	7.38483	6.16768	6.83359	7.088	5.5792	5.75965	6.25594	6.86661	6.02188	6.0541	6.40264	6.30446	6.73849	6.8873	6.95834	7.1401	6.03572	6.70324	6.65635	6.45041	7.05657	7.55325	7.98922	8.02802	7.73162	7.07068	7.68099	6.66145	6.47691	6.57575	6.41115	6.25225	7.50442	6.57463	6.56669
4932438A13Rik	6.92562	7.28476	6.6454	6.93466	5.33165	7.8695	6.10896	5.7406	6.16949	6.13277	5.91206	7.42585	6.19015	7.20659	7.34311	6.63242	6.45267	6.64579	5.52723	5.2574	6.30019	6.69096	6.88322	5.68021	7.11875	6.82914	8.16505	7.86215	6.36232	7.0278	5.70796	6.34561	8.05736	6.02135	7.26098	6.20067	7.96087	8.66705	7.25759	6.3967	7.15585	7.30853	6.58102	7.54072	6.98257	6.50514	5.64955	6.57873	5.5689
4932438A13Rik	6.26449	5.91762	5.94868	6.10651	5.71224	5.9994	5.80907	5.64874	5.65182	5.88097	6.144	6.07169	5.79765	6.19799	6.09988	5.96071	5.78971	5.49391	5.8156	5.46405	5.83717	6.55957	5.66046	6.05785	6.19433	5.89787	5.88861	6.33313	5.93288	6.00433	5.75735	5.62063	6.77748	5.7809	6.23455	5.8061	6.23941	6.45856	6.77715	5.95866	5.98367	5.92912	5.8655	6.38981	6.12979	5.89321	5.69987	5.83171	5.55168
4932438A13Rik	8.59806	7.7045	7.27794	7.91047	6.92245	7.69199	7.58321	6.41994	6.58013	6.51473	7.27535	7.43997	8.30628	7.71636	7.6582	6.73811	7.08056	7.34757	6.01122	5.66437	7.82167	8.42423	6.15609	5.49704	7.90809	7.14027	8.60702	7.61307	7.66454	7.19565	7.7827	6.88411	7.73308	7.29071	7.46183	6.36705	8.36641	7.91762	8.84531	7.49244	7.84293	8.03087	6.39269	6.332	6.86612	6.98241	8.80367	6.90417	5.35449
4932438A13Rik	11.0209	10.9883	10.8899	10.7601	10.2382	11.3059	10.8584	10.3886	10.6514	10.632	11.3265	11.6895	11.4161	11.0651	11.1523	11.38	11.0745	11.1969	10.8338	10.2022	10.8316	12.376	11.0209	11.0439	10.8462	11.5909	11.298	11.1662	11.179	11.5111	10.8412	10.7901	11.2795	11.1252	11.3352	11.237	11.9382	11.9478	12.0475	11.4378	11.4408	11.5598	10.6517	10.8256	10.8069	10.7512	12.2494	10.8344	11.4779
4932438A13Rik	8.44541	8.38545	8.3129	8.3396	7.25081	8.21272	7.98194	8.07259	7.79138	7.71884	8.08165	8.07229	8.38275	8.61035	8.3926	8.1564	8.2508	8.32889	7.40213	7.55444	8.04003	7.87567	7.76653	7.73701	8.48863	8.87017	8.01435	8.2477	8.32548	8.26238	8.15961	8.04715	7.94296	7.8184	8.05029	8.04515	9.07828	9.11036	9.2985	8.52608	8.59314	8.66185	8.13326	7.82265	7.85502	7.7052	7.78724	8.004	8.41257
4932438A13Rik	9.60122	9.44602	9.29402	9.39367	8.51215	9.28073	8.98195	7.69768	9.02409	8.64616	8.64812	9.15524	8.7324	9.11536	9.39866	9.55315	8.97786	9.52555	9.04898	9.06612	8.52517	6.52484	8.69517	8.57435	9.12384	9.89299	7.90567	9.70096	9.30897	9.30286	9.47046	9.00897	9.24231	9.57434	8.96623	9.21658	10.1556	10.1613	10.1561	9.53904	9.44685	9.50816	8.46744	9.1344	9.52165	9.11039	8.56763	8.81191	9.52785
4932438A13Rik	10.4952	10.0313	10.0842	10.0974	10.1519	9.68609	9.67675	9.31961	9.776	9.13932	9.53043	9.98912	9.73783	10.1425	9.65108	10.0669	9.30607	10.0762	8.49387	9.391	9.58772	8.49393	9.34841	9.55029	10.2677	9.98024	8.87616	10.0817	9.93878	10.0491	9.80988	9.23707	9.07851	9.96208	9.18674	9.85504	10.7792	10.8202	10.7126	10.0539	10.2404	10.4052	9.94911	9.2123	9.82334	9.97997	9.78048	9.77251	9.80188
4932438A13Rik	7.61342	7.35831	7.45251	7.88553	5.33601	7.46279	7.28039	7.02043	7.51188	6.71652	7.44599	8.11602	7.30149	7.89029	7.53727	7.96424	6.93157	7.44322	6.88853	7.52035	6.71737	6.71127	6.85433	7.20966	7.9592	6.97309	6.27113	7.48155	6.92724	7.20769	7.78127	7.36193	7.94636	7.74361	7.47161	8.08334	8.62356	9.07112	8.91768	8.07998	7.84492	7.82396	7.23763	7.15286	7.98298	7.06219	7.35729	6.99983	6.17082
4932438A13Rik	8.86585	8.72566	8.32719	9.25162	8.649	8.70332	8.7585	7.78583	8.77087	8.77333	9.07291	9.22646	8.87935	9.02591	9.07945	9.23993	8.47124	9.14886	9.17868	9.29733	8.29776	6.22859	8.31015	8.32171	8.96283	9.24838	8.55417	9.43918	8.90377	8.29776	9.39623	8.66441	9.40928	9.00285	8.84179	9.1923	10.0705	10.2777	10.0573	9.49304	9.32118	9.24671	8.22088	8.45121	9.00286	8.73696	8.28928	8.4198	7.51342
4932438A13Rik	8.08168	8.0104	7.83885	8.1023	8.71316	7.41608	7.77372	8.3608	7.91451	7.57234	7.73695	8.43381	7.31546	7.84509	7.80426	7.50553	7.69724	7.82158	7.77905	8.01689	7.26064	7.7028	7.52714	8.49676	8.58609	7.01599	7.54646	8.32911	8.23951	8.0994	7.89146	7.55281	8.34625	8.10588	7.82695	8.10979	8.49909	8.84235	9.00126	8.22294	7.9036	8.13316	7.56142	7.62348	7.89454	7.75555	9.17128	8.19115	7.42961
4932438A13Rik	8.31612	8.00909	8.33478	7.78776	8.15842	9.45425	7.9101	7.32559	7.44392	7.50119	7.33306	8.60032	8.07826	8.01811	7.83143	7.54469	7.6612	8.06635	7.378	8.51433	7.08727	7.61502	8.3291	8.66537	8.25025	8.25124	8.13353	8.48418	8.21786	8.03372	8.27286	7.48234	7.89363	7.72124	8.09671	7.91324	8.62923	8.90044	9.07788	8.20702	8.22144	8.09185	7.37342	7.10699	8.29689	7.57203	9.04551	7.78194	7.41758
4932438A13Rik	9.61823	8.93777	9.5063	9.3721	8.2729	8.62265	9.5033	9.60058	9.05383	8.9057	9.21779	10.4748	9.61266	9.51826	9.44349	9.79213	9.3889	9.53512	9.63692	8.83388	9.31335	10.3878	9.12597	8.98939	9.34824	10.2163	8.79855	9.4178	9.56403	9.97649	9.50024	8.8368	9.57489	9.55457	9.71733	9.65918	10.5587	10.4068	11.0014	9.94328	9.87406	10.1403	8.40716	9.61251	9.57819	9.24137	10.8585	9.28156	10.0051
4932438A13Rik	11.0712	11.1777	11.2161	10.8411	9.7607	11.2915	10.6166	10.7094	10.0975	9.83019	10.3218	10.4951	9.67924	9.38947	9.05113	9.85714	9.1001	9.41183	11.3736	9.53698	9.97898	10.5617	10.1525	10.5378	11.5565	10.9358	11.7331	11.4964	10.8769	11.3288	10.4436	10.3412	9.67011	11.0601	10.2384	10.4485	10.4508	10.2529	11.0003	10.2551	9.73351	10.0374	9.6885	9.80691	10.2223	10.7268	10.3876	10.7384	11.6357
4932438A13Rik	8.93969	8.51137	8.77477	8.76892	8.59385	7.83997	8.67898	7.82732	8.30289	8.22719	8.57324	9.24016	9.65333	8.99174	8.67185	9.1118	8.48698	8.53476	8.38993	9.85387	7.96659	9.61518	8.56002	8.73784	9.2258	8.88372	9.57388	9.06663	8.73847	8.7504	8.75063	8.53713	8.92495	9.16202	8.70167	9.26403	9.73051	10.0173	9.93814	9.18834	9.2783	8.86869	8.43238	8.43439	9.07285	8.74085	8.8658	8.63397	9.04714
4933403F05Rik	7.91711	7.81821	7.8488	7.96291	6.90807	8.00685	8.3522	7.95442	8.0749	8.04313	7.67216	8.11608	7.75103	7.86275	7.69013	7.77167	7.72814	7.75037	7.85972	7.78316	7.75347	7.61154	7.80386	7.98877	8.23096	8.06999	8.09128	8.45535	7.98265	8.04722	8.09062	7.94507	7.41196	7.816	8.3407	8.29272	8.02854	7.9138	7.85444	7.89509	8.2061	8.06572	7.89297	7.78293	7.83231	8.30224	9.50076	7.92429	7.97457
4933403G14Rik	5.34161	5.69361	5.30972	5.47174	5.71618	5.42657	5.40561	5.74841	5.76411	5.4817	5.60236	5.41114	5.48224	5.59897	5.60151	5.34656	5.46472	5.56263	5.45994	5.80606	5.84245	5.63847	5.74098	5.66891	5.3852	5.33381	5.63779	5.71064	5.29691	5.55859	5.42257	5.63836	5.34943	5.46505	5.47839	5.35762	5.47126	5.22801	5.38648	5.35909	5.31231	5.30659	5.66196	5.64113	5.4668	5.80324	5.79624	6.2844	5.39289
4933406J08Rik	5.26261	5.22919	5.36007	5.30336	5.42279	5.55279	5.34802	5.21291	5.32182	5.24919	5.27594	5.35794	5.84791	5.80994	6.16768	5.74567	5.71389	5.74708	5.3923	5.38276	5.34408	5.57713	5.35929	5.29705	5.45446	5.40349	5.36912	5.37071	5.264	5.44234	5.27451	5.24857	5.35327	5.3104	5.20489	5.33207	6.26631	6.05553	6.09224	5.84812	6.03154	5.95634	5.35275	5.31595	5.28048	5.55343	5.33197	5.26612	5.37395
4933406P04Rik	5.7979	5.72424	6.22933	5.83875	7.16521	8.18173	5.54453	5.98985	5.77157	5.66468	5.98878	5.64332	5.55525	5.29235	5.75732	5.54742	5.64777	5.65379	7.75802	5.87472	5.93073	5.60919	5.93436	6.51483	5.68395	5.73606	5.69824	5.63777	5.49771	5.5725	5.57384	6.11699	5.70325	5.59364	5.71743	5.75955	5.47035	6.41668	5.80761	5.68579	5.42536	5.57446	6.48888	5.85701	5.7707	6.07992	5.96838	6.24352	6.45074
4933407C03Rik	7.39208	7.19995	7.35088	7.4675	7.03581	7.1898	6.67144	6.72927	6.81945	6.83319	7.19351	7.20731	6.54117	6.20695	6.25708	6.41003	6.47698	6.35423	7.06869	7.20253	6.65874	6.73434	7.26622	6.84144	7.48767	7.9251	7.11816	7.13319	7.33351	7.47354	7.04187	6.9572	6.82545	6.94805	6.58072	6.98095	6.33711	6.29628	6.27885	6.62081	6.78889	6.57257	6.82658	7.13398	6.75951	7.04384	7.27745	6.90406	7.46031
4933407C03Rik	6.94361	7.23399	6.86298	7.4904	6.15683	7.46859	6.28192	6.31246	6.52817	6.86386	7.10655	7.38254	5.94939	6.36947	6.13431	6.93798	6.46953	6.61033	6.2637	6.58875	6.64276	6.03347	7.35404	7.11158	7.26616	7.59548	6.66485	6.85601	7.33122	7.36887	6.01909	6.40405	6.0132	6.65335	6.99344	6.92341	6.27578	5.87817	7.05459	6.54405	6.89664	6.71466	6.85884	7.31727	6.64467	6.98002	6.92597	7.46107	8.66336
4933407H18Rik	5.75193	5.61331	5.80131	5.82807	5.50096	5.38278	6.23856	5.70611	6.04521	5.71454	6.29651	6.14283	5.68339	5.65677	5.67856	5.60002	5.4678	5.65605	6.1976	6.16568	5.86997	5.60192	6.06216	5.88589	5.75142	5.54999	5.79791	5.89896	5.76023	5.84483	6.25792	5.86318	5.83512	5.79148	5.84283	6.16483	5.89373	5.75526	5.65471	5.53257	5.56105	5.65932	5.83953	5.81388	5.90223	6.38761	6.18696	6.13775	5.91958
4933411K20Rik	8.5886	8.40184	7.79112	8.87573	7.32151	7.73241	8.50635	8.91606	8.7049	8.97726	8.94831	8.71657	8.43552	8.54622	8.64392	8.7563	8.73158	8.72068	8.9935	8.99865	9.21773	9.56537	8.69485	9.05303	8.24932	8.08332	7.77814	8.51256	7.86443	7.65742	8.29595	8.71474	7.62351	8.34475	8.82556	8.57882	9.25341	9.12623	9.20404	9.09636	9.399	9.28338	9.107	9.2942	9.37609	9.42207	9.87265	8.91784	8.5297
4933413J09Rik	5.54393	5.57467	5.66672	5.60518	5.42439	5.65089	5.91826	5.40678	5.56568	5.59765	5.62478	5.76958	6.20707	6.24764	6.34405	6.22446	6.26692	6.37032	5.65614	5.80222	5.96329	5.72475	5.74265	5.8947	5.63635	5.44363	5.66444	5.92716	5.62232	5.64454	6.20389	5.9249	5.98832	6.03279	6.23467	5.61159	6.1146	6.54912	6.35333	5.91508	5.61678	5.79042	6.04444	5.78255	5.55126	5.92639	5.874	6.25952	5.61396
4933415A04Rik	9.98723	10.1247	9.88779	9.76892	8.60672	9.80849	9.80067	9.84234	9.92694	9.85261	9.44774	9.82061	7.94452	8.06347	8.17471	8.00792	8.06642	7.94883	11.0874	11.0885	10.9734	10.5618	10.5916	11.1104	10.108	9.90283	10.1133	9.89736	10.2381	10.5118	9.96796	10.2396	9.29285	9.35561	9.12906	9.32749	8.49761	8.73179	8.85471	8.25878	8.48032	8.49998	9.54852	9.00653	9.64996	10.2548	10.2457	10.2006	9.94766
4933421E11Rik	6.54506	6.32672	6.11475	6.44681	6.58616	6.30365	6.32484	6.50519	6.96051	6.25143	6.51913	6.13337	5.95252	5.97553	5.87874	6.27887	5.97491	6.12967	6.46562	6.31459	6.44583	5.95241	6.10251	5.98267	6.32261	6.38087	6.08844	6.29726	6.34298	6.28123	6.49382	6.29164	6.24844	6.37647	6.72788	6.53799	5.82521	5.81976	5.91396	5.85358	5.93307	5.62991	6.58375	6.10884	6.44115	6.49178	6.59429	6.74596	6.35155
4933424B01Rik	9.6075	9.58682	9.20995	9.43491	8.99806	9.44788	9.37714	9.38711	9.59486	9.35194	9.63291	9.54524	9.6183	9.71121	9.57637	9.41995	9.59724	9.76771	9.11532	9.01174	9.14494	8.62257	9.13563	9.17935	9.47578	9.23051	9.07077	9.26055	9.33336	9.43678	9.47063	9.39315	9.6469	9.17425	9.53982	9.62034	9.76516	9.67963	9.82274	9.64856	9.72951	9.68123	9.19678	9.27987	9.23971	8.73619	8.52353	9.00832	9.09764
4933426I21Rik	7.14476	7.83779	7.17298	8.03809	7.27759	6.74279	8.14977	7.84286	7.5803	8.36474	7.36118	6.83784	8.66333	8.7593	8.63957	7.83926	8.64915	8.96983	8.82375	8.62293	8.68676	8.7695	8.55727	8.93647	7.63241	8.35183	7.93797	6.93737	7.85823	7.83383	8.25194	8.79809	7.96324	9.33021	8.48517	8.60653	7.83335	7.50012	8.07617	8.54795	7.94072	8.54338	8.92541	7.87622	8.28676	7.74443	8.13774	8.75965	7.40356
4933426M11Rik	6.48623	6.24336	6.39918	6.26995	6.43074	5.96003	6.35883	6.39342	6.16539	6.35085	6.48238	6.33887	6.12176	6.17836	5.98499	6.13412	5.99641	6.09206	6.30323	6.54568	6.69498	6.41294	6.66754	6.28723	6.67076	6.66857	6.69093	7.05243	6.58506	6.84164	6.3597	6.36447	6.30827	6.17129	6.23425	6.1919	6.37799	6.25715	6.31357	6.2612	6.31418	6.29538	6.39398	6.49888	6.20481	6.83476	6.43452	6.67926	6.38946
4933427D14Rik	5.93664	6.21642	6.05543	5.9548	5.94531	5.98001	6.11777	5.94263	6.21755	6.0928	6.1715	6.38933	6.07	6.02967	6.32095	5.88284	6.07204	6.23665	6.70661	6.31919	6.39557	5.99046	6.38495	6.37209	6.05525	5.95731	6.00531	5.94898	6.1505	6.1981	6.67899	6.41108	6.25445	6.34249	6.23961	5.9954	6.0761	6.04744	6.22824	6.14342	6.26479	6.30903	6.16551	6.25909	5.9916	6.3414	6.1545	6.44225	5.91552
4933427G17Rik	5.20194	5.39357	5.28514	5.49369	5.68185	5.53811	5.2339	5.28306	5.22652	5.23786	5.12705	5.14272	5.2828	5.29757	5.30173	5.37338	5.5188	5.408	5.21821	5.27502	5.23377	5.30639	5.20826	5.26668	5.32882	5.3448	5.48227	5.36494	5.23715	5.50928	5.11011	5.18624	5.11308	5.36726	5.31389	5.25422	5.58109	5.44595	5.46428	5.38836	5.34041	5.50642	5.34738	5.2757	5.24327	5.17154	5.17662	5.305	5.41065
4933427G23Rik	7.10925	7.23347	7.37577	7.38052	7.50124	6.98674	7.04409	7.0157	6.93062	6.81733	6.87504	6.9383	6.84147	6.92042	6.84895	6.864	7.04388	7.00795	6.50023	7.07013	6.98238	6.87581	6.92932	6.79829	7.37097	7.08603	6.97293	7.40672	7.29398	7.27829	6.96621	6.92696	6.87892	6.92484	6.69185	6.74861	7.1073	6.84378	6.74341	6.95467	6.93273	6.70408	6.91139	6.83485	6.65682	6.7959	6.7125	6.76539	7.50231
4933433P14Rik	8.09856	7.89952	7.98729	8.09126	7.70275	7.5198	7.63058	7.629	7.93498	7.70198	7.52714	7.5457	5.6632	6.79835	6.84179	6.6427	7.4005	7.17072	7.68223	8.3199	7.53699	7.76856	7.6327	7.81063	7.98769	8.20035	7.70824	7.77407	7.98498	8.12073	7.44455	7.73604	7.2563	7.00213	7.81278	7.77633	6.82577	6.3953	7.41897	6.38002	7.04827	6.2645	7.41242	7.82978	6.60435	8.02091	8.5254	7.8858	8.43686
4933434E20Rik	7.42612	7.64842	7.39557	7.5848	7.71767	7.35767	7.69436	7.73694	7.66106	7.49877	7.5468	7.32214	8.00889	8.13121	8.03373	7.89374	7.76998	7.8698	7.73641	7.70078	7.91436	7.32802	7.75159	7.72757	7.60107	7.87547	7.709	7.46912	7.5662	7.45318	7.59041	7.75489	7.52097	7.46982	7.52701	7.60054	7.99228	7.74241	7.92212	8.36209	8.11485	8.05217	7.82116	7.74418	7.96689	7.8536	7.85088	7.92812	7.77184
4933436C20Rik	5.38566	5.37971	5.36652	5.271	5.30525	5.1274	5.31726	5.46471	5.12145	5.39634	5.17931	5.11128	6.5793	6.19058	6.21677	6.45511	5.9262	5.92182	5.76832	5.45966	5.45956	5.43623	5.30482	5.49369	5.31902	5.39158	5.41041	5.23845	4.98857	5.25092	5.78808	5.677	5.4659	5.26186	5.2012	5.13674	6.4326	6.59571	6.24799	6.33671	6.18249	6.46766	5.24153	5.15434	5.21441	6.01754	6.0321	6.32871	5.557
4933439F18Rik	7.23398	7.19569	7.67262	7.40576	7.71053	6.96451	7.60566	7.98887	7.4912	7.92081	7.62528	7.93603	8.83821	8.72238	9.24819	8.83523	8.74743	9.201	7.99397	7.74332	7.83407	8.26263	7.6217	7.97308	7.5093	7.7449	7.84992	7.22491	7.71008	7.57828	8.11769	7.5294	7.56917	7.6679	7.73735	8.49519	9.29171	9.43575	9.15755	9.22567	9.21886	9.18522	7.98068	8.23415	7.07315	7.84106	9.26717	7.90621	8.54548
5031434C07Rik	6.0014	5.85618	6.37212	5.85648	6.04869	6.21407	5.89145	5.85655	5.843	5.8219	5.80445	5.76761	5.81497	5.74872	5.80253	5.95527	5.76384	5.76954	5.86036	5.83314	5.87557	5.94258	5.82339	5.82006	6.09873	5.9904	6.4213	6.08564	6.05923	6.04862	5.91522	5.86168	5.97481	5.85287	5.79727	5.72739	5.83468	5.67611	5.92813	5.89684	5.88899	5.83461	5.97012	5.92757	5.92572	5.92287	5.83948	5.74889	6.10064
5033414D02Rik	7.3919	7.78509	7.30187	7.93918	8.3926	7.60322	7.56389	7.95772	8.17948	8.2168	7.64718	7.24342	6.13271	6.84657	6.43975	6.28988	6.70398	5.99956	8.05495	8.83819	9.00219	7.79227	7.67894	7.68135	7.87869	7.46642	7.34484	7.59846	7.26469	7.44894	7.82897	8.20863	8.28998	7.34418	7.59727	7.24447	6.38008	6.31428	6.36209	6.63847	6.14557	6.15582	7.51722	7.68268	7.52	8.94816	8.92379	8.53804	7.28577
5133401N09Rik	8.14957	8.12958	8.08212	8.21802	7.08701	8.07687	8.31587	8.35716	8.48845	8.17383	8.32405	8.21773	7.07136	6.09181	6.97983	7.3618	6.63824	6.51443	8.25518	8.58475	8.75958	8.46774	8.58496	8.40061	8.25113	7.73005	7.58935	8.03149	8.00263	8.09914	8.51618	8.78164	8.3414	8.12789	8.58324	8.28237	7.10567	6.31218	7.41528	6.45611	7.09389	7.22225	8.05117	8.21167	7.93514	8.6086	9.33552	8.8447	8.3594
5330417C22Rik	5.2971	5.28909	5.41903	5.36079	5.49779	5.54888	5.30329	5.29859	5.18593	5.2549	5.30814	5.24828	5.4629	5.27601	5.24393	5.48746	5.35422	5.39109	5.44528	5.30568	5.45193	5.35324	5.39728	5.32481	5.42456	5.561	5.46674	5.53611	5.42802	5.42593	5.30441	5.29614	5.23562	5.516	5.2532	5.45295	5.2959	5.27993	5.36195	5.36484	5.37482	5.38975	5.55299	5.9727	5.70497	5.26542	5.42514	5.2498	5.42358
5430407P10Rik	5.60355	5.61081	5.58422	5.54428	5.50106	5.45396	5.51854	5.50524	5.43497	5.67668	5.59659	5.40816	5.79319	5.65952	5.93888	5.9605	5.92724	5.72714	5.69724	5.87156	5.81174	6.42898	6.03718	6.00393	5.55023	5.68464	5.67799	5.67716	5.66393	5.80316	5.44252	5.78586	5.4829	5.78516	5.59821	5.58359	5.76294	5.69627	5.68181	5.93606	5.93445	5.79228	6.21899	6.14998	6.138	5.81092	5.65236	5.9226	5.65355
5430411C19Rik	5.09763	5.04168	5.02989	5.0379	5.05903	5.3682	5.36468	5.03533	5.07013	5.18476	5.16748	5.19452	6.02133	6.28249	5.3332	5.58469	5.46746	5.4562	5.1449	5.25747	5.20824	5.18002	5.07661	5.11394	5.02525	5.15611	5.20411	5.30812	5.093	5.15235	5.09095	5.03221	5.04713	5.09278	5.07319	5.02717	5.45941	6.10169	5.40844	5.62273	5.49528	5.50963	5.34068	5.02675	4.96245	5.18498	5.18862	5.11073	5.10724
5430411K18Rik	6.23537	6.27445	6.12283	6.4038	5.76788	5.86345	6.26207	6.46793	6.22273	6.2199	6.31819	6.40089	6.43222	6.26265	6.37166	6.36958	6.30265	6.25807	6.44396	6.36761	6.44105	6.20474	6.37558	6.27755	5.98115	6.3139	6.282	6.2733	6.13671	6.30333	6.47149	6.27444	6.4258	6.47822	6.38543	6.24433	6.46971	6.66548	6.73661	6.3939	6.46287	6.42658	6.32657	6.31125	6.30524	6.5988	6.40251	6.28448	6.31332
5430417C01Rik	6.33125	6.0355	6.22632	5.80291	5.41483	5.4132	5.69175	5.76385	5.60746	5.85231	5.51945	5.33786	5.61717	5.48158	5.58339	5.90011	5.68789	5.42059	6.27757	5.59906	6.73572	5.4758	5.65132	5.58731	6.25164	5.9033	6.15491	6.30109	6.09308	7.15319	5.42664	5.42141	5.55131	5.85415	5.77819	5.66901	6.19191	5.65675	5.72921	5.8256	6.37637	6.02187	5.73647	5.79341	5.77287	5.22849	5.14028	5.89613	5.82571
5430435G22Rik	5.30808	5.36341	5.37728	5.37024	5.45058	5.33928	5.17293	5.28136	5.2019	5.23889	5.12571	5.04469	5.2915	5.2356	5.28492	5.26719	5.25758	5.20459	5.36735	5.40368	5.4996	5.35397	5.34227	5.22084	5.31152	5.48068	5.4107	5.56954	5.2062	5.289	5.30449	5.34594	5.21633	5.45539	5.21609	5.29446	5.33167	5.18722	5.25713	5.26421	5.15277	5.33591	5.47253	5.6656	5.43634	6.21614	6.15197	5.60545	5.33973
5430437P03Rik	9.12508	9.01096	9.01591	9.13579	10.0271	8.57624	8.57426	8.57906	8.65046	8.79044	8.9886	8.89138	7.79892	8.36536	8.05374	8.25793	8.19509	8.20232	9.01368	8.05341	8.57281	7.93472	8.67265	8.70377	9.3088	8.92364	9.23474	8.62323	8.92593	9.03386	8.39774	8.56587	8.32086	8.37563	8.76358	8.88289	8.06512	8.83114	8.19317	8.32677	8.18403	8.77682	8.88606	9.05623	9.13976	8.839	8.52161	8.46585	9.08985
5730403B10Rik	8.0251	8.04213	8.06625	8.12754	8.33922	7.79678	8.41608	8.34382	8.17713	8.45131	8.45251	8.34207	7.40464	7.66264	7.67915	8.16677	7.94384	7.88302	9.28055	8.76988	8.72833	8.27702	8.55408	8.96128	8.54129	8.33617	8.19554	8.33865	8.0494	8.01973	8.58948	8.59457	8.35123	8.4741	8.33169	8.48345	7.61818	7.66907	7.87213	7.84376	7.94526	7.79754	8.9025	8.91338	8.72168	8.93416	8.59692	8.81355	8.09134
5730408K05Rik	7.11249	7.49992	8.29226	8.52145	9.30109	8.22079	5.96553	7.24136	6.32997	6.76274	7.00835	5.82792	7.66965	7.95959	8.22227	7.61409	8.53046	7.51746	8.06532	8.27629	7.41331	7.2367	7.0236	7.46918	7.79335	7.36996	6.56185	6.45407	6.99668	5.87158	7.65387	7.26645	6.04933	6.13377	7.05931	6.24431	7.86351	8.22425	6.66804	7.76395	7.79914	8.10118	6.46456	6.7772	6.0099	7.61494	8.63773	7.35546	7.37123
5730409E04Rik	6.21589	6.06472	6.30632	6.25482	6.2883	6.19182	6.1722	6.2903	6.28685	6.18269	6.24819	6.20877	6.36797	6.21784	6.25828	6.28969	6.44523	6.26011	6.1837	6.01523	6.14303	6.34499	6.15406	6.3841	6.20793	6.06108	6.27567	6.14399	6.09746	6.09771	6.18287	6.1912	6.22184	6.12509	6.17474	6.0827	6.51842	6.1543	6.31812	6.29429	6.1754	6.24331	6.24484	6.37185	6.19813	6.22229	6.3099	6.0885	5.90467
5730410E15Rik	5.62736	5.61961	5.58683	5.6115	5.651	5.76605	5.85532	5.7573	5.65742	5.73361	5.74973	5.6726	5.59002	5.59973	5.69802	5.69292	5.52178	5.6345	6.04183	5.94246	6.28704	6.03649	5.83718	6.00759	5.63237	5.63029	5.74829	5.78348	5.69232	5.66487	5.70509	5.73542	5.65637	5.6828	5.7053	5.71812	5.63717	5.5211	5.44459	5.43762	5.65129	5.63031	5.88387	5.85005	5.86381	6.03935	6.06355	5.9855	5.67546
5730419I09Rik	7.44561	7.06299	7.1771	7.26713	6.23814	6.86552	7.09618	7.03627	7.30921	6.78165	7.22665	7.54571	8.60088	8.72732	8.76407	8.96507	8.86783	9.15032	6.31815	6.56559	6.69547	6.25037	6.3848	6.42072	6.7108	6.86445	6.76911	6.93657	7.03491	6.83006	6.90149	7.16481	6.55163	7.10718	7.03191	6.96554	8.8745	8.88068	9.05553	9.07855	9.17811	9.19047	5.98764	6.18835	5.69971	6.69155	6.85619	6.39964	6.70568
5730437N04Rik	7.95967	8.77383	7.93313	7.79726	8.46587	7.94638	8.66805	8.49891	8.77472	8.71604	8.72091	8.56656	8.07621	8.06947	8.22165	7.99965	8.6453	8.20396	8.3225	8.19976	7.84336	6.93633	8.43772	8.38586	8.21759	7.65082	7.98585	7.92395	8.60983	8.35564	8.47937	8.64637	8.56878	7.95038	8.88306	8.71636	7.51522	7.09198	7.24558	7.92864	8.2829	8.12444	8.35997	7.99007	8.28666	7.97335	6.2442	8.41865	7.64019
5730455O13Rik	8.78577	8.62125	8.52929	8.69367	8.36783	8.4	9.37693	8.98575	9.34974	9.05403	8.7771	9.15543	10.0448	10.2081	10.1138	9.96284	9.88233	9.91081	8.74697	9.23629	9.22852	8.17238	9.09273	9.07594	8.4555	8.17361	8.56613	8.94477	8.7679	9.09291	8.67375	8.9424	9.29127	9.12741	9.22539	9.08187	10.0267	10.5651	10.1158	10.4341	10.3107	10.4046	8.81978	8.80271	8.85725	9.07556	9.48042	9.35149	8.46267
5730455P16Rik	7.47394	7.8817	7.88529	7.51261	7.59418	6.84481	8.06388	8.0597	8.50742	8.05642	8.17341	8.12022	8.51518	8.38244	8.24557	8.8791	7.83523	8.58302	7.58221	7.7775	8.31964	7.85909	7.84067	7.32762	7.57248	6.67525	7.5825	7.58139	7.84815	7.94959	8.2764	8.53484	8.57288	7.93288	8.41654	8.13026	8.64915	8.42419	8.38043	8.311	8.62389	9.01646	7.27654	7.76059	7.69522	8.33439	7.45358	8.18057	7.52724
5730469M10Rik	7.99385	7.76702	8.22534	8.26099	7.76455	7.84115	8.90133	9.51951	9.28248	9.65617	9.9654	9.28003	8.61687	8.59142	8.60553	8.86546	8.59664	8.55953	8.5922	8.40737	8.72749	9.90535	10.2857	10.2533	8.2914	8.32257	7.60918	8.49949	8.54259	8.63954	9.18539	9.00668	9.16032	9.0266	9.34776	8.98278	8.04535	8.20197	8.03903	8.41523	8.82546	8.63194	9.0904	9.35395	9.52896	8.59891	9.37388	8.63812	7.83944
5730471H19Rik	8.76278	8.80151	8.88924	8.91426	8.96442	8.31864	9.33944	9.30675	9.48307	9.12624	8.93351	9.23664	9.56984	9.44953	9.47961	9.90231	9.81827	10.015	9.00003	8.55989	9.27712	8.64763	9.00768	9.11438	8.64203	8.6247	8.43866	8.60422	8.59084	8.39525	9.33083	9.35453	9.12011	9.04418	9.05337	9.406	9.29816	9.21385	9.19999	9.84887	9.74627	9.54372	8.69471	8.46606	8.70408	9.59085	9.8429	9.42871	8.35415
5730494M16Rik	8.62159	8.72752	8.55915	8.87312	8.95933	8.64178	8.72046	8.42805	8.79251	8.66414	8.65915	8.49054	8.59653	8.65436	8.69135	8.67888	8.8538	8.65389	6.86567	6.80578	7.70834	8.34224	8.14166	7.75877	8.70834	9.0287	8.76141	8.88821	9.11597	9.05603	8.8056	8.74376	7.97181	8.02907	8.45133	8.3558	8.91802	8.7814	8.92199	8.82054	9.12137	8.79691	7.56803	7.49108	7.79437	8.56846	8.58604	8.75304	9.33849
5730494N06Rik	8.65829	8.60885	8.80223	8.58051	8.53489	9.18643	8.54931	8.55668	8.38174	8.6709	8.75764	8.5295	8.66565	8.78855	8.51126	8.51402	8.74784	8.59855	8.55496	8.53668	8.67545	8.25258	8.595	8.58032	8.55884	9.02563	8.5829	8.55714	8.51811	8.52135	8.8363	8.69076	8.79275	8.59437	8.57771	8.61135	8.7187	8.67017	8.61459	9.1694	8.73085	8.59148	8.8162	8.51297	8.44294	8.69869	8.61043	8.59304	8.71416
5730508B09Rik	5.80706	5.88806	6.1212	5.75869	6.23559	6.37081	5.44012	5.49637	5.6004	5.62538	5.99679	5.56916	6.06751	5.63634	5.88138	5.94456	5.67237	5.87795	5.42587	5.4641	5.43657	5.58021	5.74645	6.15761	6.09873	6.14014	6.3706	5.81965	5.55518	6.0734	5.48854	5.54239	5.86917	5.50137	5.60975	5.50381	5.75684	6.24662	6.06459	5.78995	5.93854	5.58265	6.06675	6.25542	5.99129	5.43673	5.642	5.40243	5.94077
5730522E02Rik	6.16896	5.95049	6.06266	6.15068	6.13395	6.2687	6.06033	6.20769	5.98467	5.97387	6.13962	5.81337	6.0028	5.94208	5.93811	5.9647	6.00916	6.09999	6.08391	6.17155	6.21842	6.37094	6.08358	6.26189	6.13827	6.09338	6.18239	6.18452	5.83232	6.05529	5.89801	6.02638	6.05253	6.01061	5.96727	6.03544	5.88977	5.88931	6.01602	5.97412	5.97481	5.95023	6.29275	6.06024	6.17919	6.0159	6.1228	6.08887	6.07324
5730528L13Rik	6.44432	6.52116	6.42445	6.5688	6.34561	6.27206	6.23938	6.36427	6.42373	6.1567	6.69646	6.19633	6.52044	7.19621	7.06066	6.6982	7.00397	6.92454	6.1323	6.0847	5.98995	5.96314	6.29693	6.17959	6.36172	6.82178	6.28656	6.46706	6.50422	6.68431	6.23878	6.05043	6.38844	6.46487	6.59971	6.4957	6.95	7.262	6.92868	6.99742	7.30768	6.737	5.83692	6.24968	6.24512	5.92295	6.40145	6.06585	6.09774
5730585A16Rik	5.46098	5.3193	5.64073	5.38775	5.52292	5.58265	5.46893	6.00766	6.17181	6.17976	6.3307	5.48389	5.47407	5.40934	5.306	5.22614	5.40457	5.20947	5.58011	5.8624	6.17995	6.34578	5.21479	5.40516	5.78137	5.85851	5.4046	5.41756	5.57052	5.2984	6.05477	6.08699	6.33101	6.30767	5.66423	5.95509	5.38955	5.24932	5.20988	5.25421	5.35445	5.39802	5.64343	5.50553	5.4157	5.96766	6.90813	5.62519	5.37097
5730590G19Rik	8.03783	7.96652	7.63326	8.144	6.30976	7.60456	8.41516	8.20623	8.56242	8.34789	8.55035	8.69174	9.84996	9.76859	9.832	9.70675	9.69341	10.0718	5.72501	5.72163	5.88304	6.23452	7.16683	5.95915	7.59691	7.30669	6.76548	7.59817	7.7538	7.69942	7.97873	7.96928	8.18585	7.98042	8.14699	8.64211	9.80359	9.45694	9.90531	9.21364	9.25663	9.21044	7.76882	7.68941	7.93939	6.41611	6.81416	7.09127	7.32634
5730601F06Rik	9.48534	9.38494	9.11456	9.56932	9.87101	8.76327	10.5305	10.492	10.1797	10.2705	10.194	10.4733	8.02312	8.33519	8.44331	8.79492	8.24749	8.16084	10.807	10.7295	10.8442	10.3385	10.6705	10.7903	9.75086	9.39461	8.53583	9.66747	9.59449	9.38498	10.5789	10.2819	10.4196	10.0754	10.1515	9.94119	8.3957	7.54722	8.46249	8.54092	8.45014	8.23956	10.2974	9.72205	10.224	10.5366	10.3143	10.5833	9.85041
5830415F09Rik	5.9527	6.04183	5.97396	5.87172	7.42798	6.30387	5.78092	6.31664	6.06871	6.24516	5.72332	5.77091	6.8473	7.14075	6.79675	7.12894	7.30247	7.27207	6.09071	5.89311	6.31133	6.40551	5.99096	6.19218	5.96685	6.01952	6.03791	6.15899	5.89059	5.97414	5.8463	6.08327	5.78718	6.0048	5.97159	5.92007	7.28422	7.33472	7.21244	7.22017	7.22612	7.50984	5.84658	5.99434	5.96653	6.43358	6.23077	5.85668	6.32326
5830417I10Rik	9.07119	9.14322	9.28614	8.98895	9.45542	9.16232	9.03778	9.34301	9.21014	9.16949	9.00038	9.21446	9.78394	9.40073	9.16344	9.63303	9.37801	9.47624	9.13956	9.11185	9.113	8.77031	9.15765	9.05897	9.19778	9.2139	9.15396	9.04196	9.20933	9.10925	8.94385	9.14964	9.20394	8.823	9.44655	8.90756	9.4172	9.4487	9.24222	9.73561	9.52223	9.22271	9.73006	9.28672	9.15052	9.09424	8.9185	9.067	9.09664
5830418K08Rik	8.74295	8.62133	8.76632	8.82863	7.96032	8.50488	9.16615	9.0064	9.1911	9.01757	8.85821	8.97847	9.79327	9.61726	9.83031	9.55204	9.91144	9.9184	8.21737	8.42034	8.68473	8.51549	8.68127	8.6274	8.90537	8.48672	8.54625	8.78189	8.69756	8.78179	8.60845	8.98935	9.14227	9.2801	9.08241	9.1517	9.81497	9.64801	9.58404	9.73199	9.77245	9.72342	9.08898	8.784	8.55947	8.24314	7.59574	8.28397	8.93654
5830433M19Rik	6.35291	6.36055	6.48374	6.42073	7.35352	6.31228	6.78254	6.33881	7.08171	6.30485	6.23762	6.33209	7.33268	6.81983	7.19391	7.00045	6.88761	7.21632	6.37497	6.25205	6.18457	6.59243	6.6512	6.32842	6.18562	6.39402	6.18241	6.22927	6.37667	6.45392	6.53159	6.36981	7.03277	6.80016	6.54916	6.19473	6.62532	6.7286	6.62392	7.15211	6.83107	6.92416	6.45118	6.48016	6.08404	6.16805	6.82185	6.17773	6.42903
5830454E08Rik	6.31019	7.00007	6.49431	6.27003	6.29363	6.69246	6.76983	7.8623	7.85401	6.94031	5.81262	7.11766	6.75398	7.12654	7.026	7.02632	6.9274	6.85513	7.879	7.2252	7.44815	7.95701	7.07135	7.08736	6.8489	6.79437	7.29072	5.78661	6.30768	6.24702	8.19363	7.94937	7.33411	5.80641	6.91996	7.12231	6.72546	7.11788	6.6588	6.93409	6.84651	6.70667	6.74199	6.74602	6.00323	8.4835	7.99309	8.5942	7.15087
5930403L14Rik	6.78645	6.7466	6.7383	6.75861	6.84267	6.85311	6.67789	6.75765	6.6438	6.60783	6.80955	6.71108	6.76693	6.71874	6.71053	6.62361	6.76786	6.69618	6.78954	6.83725	6.78361	6.86789	6.76501	6.6998	6.65266	6.75457	6.82639	6.88979	6.78597	6.92653	6.80772	6.62037	6.75506	6.7704	6.7987	6.67699	6.70011	6.69343	6.75039	6.76644	6.65592	6.85003	6.82545	6.67211	6.74531	6.97638	6.8222	6.77445	6.81519
5930412G12Rik	6.25144	6.17981	6.25245	6.0164	6.41455	6.73816	5.98328	5.76734	6.0805	5.96638	5.83768	6.01275	5.82702	6.23517	6.23282	6.0681	5.86926	6.12131	5.93537	5.9286	6.09056	6.16493	5.82827	5.98917	6.69792	6.59867	6.60781	6.25903	6.20291	6.20719	5.99933	6.13928	5.98027	6.2396	6.09765	6.0278	6.416	6.37163	6.33609	6.39447	6.21168	6.29613	5.86428	5.93187	5.96521	5.80911	5.99751	5.7975	6.66893
5930416I19Rik	9.4454	9.12342	9.42808	9.38383	8.97173	8.88632	9.07561	9.45752	9.59477	9.59468	9.55233	9.03335	8.63221	8.6225	9.18412	8.91118	8.8274	8.7048	9.03703	9.39035	8.99075	9.10812	9.05549	9.21529	9.0713	9.31038	9.0953	8.95144	8.97749	9.1177	9.2143	9.44318	9.02929	8.97378	9.30655	9.50322	8.43755	8.76791	8.45168	8.56811	8.91541	8.38714	9.01847	9.08435	8.98527	8.94221	8.75937	9.0193	9.7503
5930422O12Rik	6.86649	7.05038	6.94932	6.88731	7.11729	7.12802	6.80297	6.7978	6.6132	6.79018	6.97075	6.64675	6.99005	7.14637	7.20741	7.25543	6.97416	7.23142	6.79687	6.90659	6.9223	6.87673	6.8417	6.82186	6.92046	7.22012	6.98269	6.85104	6.76786	6.98543	6.49599	6.82443	7.01331	6.59634	6.86665	6.70217	7.04964	6.80957	6.79895	7.06112	6.9835	6.97047	7.0133	6.77662	7.01752	6.83522	7.29099	6.70832	7.05722
5930434B04Rik	6.11971	6.21992	6.28148	6.26591	6.28861	6.45901	6.51815	6.9986	6.55395	6.736	6.49211	6.73341	6.16423	5.93034	5.91708	5.99972	5.90813	5.80156	6.58133	6.39658	6.73603	6.8413	7.30378	6.609	6.43696	6.0292	6.36329	6.59188	6.74678	6.31542	6.98399	6.6745	6.17927	6.14569	6.36075	6.53944	5.88257	5.92215	5.89602	5.85649	5.82817	6.24898	6.42342	6.04404	6.32887	6.77109	7.27635	6.94822	6.35429
5930434B04Rik	6.01428	6.09191	6.05904	6.15925	5.93608	5.89902	6.2835	6.35796	6.20772	6.21802	7.12289	6.39761	5.87334	5.72698	5.93939	5.80503	5.8572	5.872	6.28225	6.00087	6.31781	6.14841	6.23986	6.06575	6.13464	5.97993	6.09806	5.98757	5.93954	6.07341	6.04008	6.42977	6.13367	6.26718	6.04393	6.29187	5.89024	5.78357	5.81672	6.01516	5.86675	5.82581	6.09274	6.11328	6.1533	6.31876	6.2109	6.10906	6.15845
6030408B16Rik	6.94832	7.14105	6.91382	7.02804	6.43666	7.3112	8.66371	8.8259	8.7007	9.44836	9.6445	8.59889	7.07826	6.87527	6.64687	6.64122	6.93992	6.81195	8.50169	8.77865	8.61049	8.28598	8.73377	9.02652	7.16825	7.19236	7.13796	7.58084	7.57399	7.54811	8.48436	8.9766	8.62985	9.49304	9.69816	9.85874	6.70156	6.4708	7.30204	7.12027	6.8263	7.09184	9.78174	9.60415	9.57316	7.64882	7.74025	8.08373	8.20243
6030419C18Rik	5.71835	5.76731	5.78353	5.80841	5.67012	5.94556	6.21326	6.78134	6.7544	6.45123	6.39293	6.30887	6.37538	6.40022	6.29487	6.13801	6.28409	6.18805	6.57091	6.50493	6.52164	6.11405	6.48247	6.06402	5.81216	5.85241	5.84907	5.82272	5.74715	5.80275	6.46428	7.04733	6.63189	6.14721	5.93065	6.18661	6.33878	6.85939	6.30085	5.87702	5.9875	6.07146	5.86716	5.92054	5.75187	5.96894	6.21056	6.45356	5.63476
6030422M02Rik	5.39359	5.40022	5.36022	5.43548	5.61145	5.8323	5.3175	5.28408	5.23879	5.48341	5.17275	5.25016	5.58835	5.70049	5.60137	5.78428	5.69204	5.98795	5.43293	5.24796	5.50784	5.36624	5.2298	5.50123	5.3055	5.34101	5.48714	5.41339	5.14862	5.35657	5.25328	5.53656	5.39509	5.39897	5.34685	5.36545	6.66533	5.84346	5.94085	6.4301	6.46469	6.60338	5.53554	5.3722	5.59202	5.53528	5.27596	5.20415	5.48601
6030429G01Rik	5.31836	5.22287	5.3348	5.26186	5.27677	5.33552	5.30782	5.4006	5.16658	5.25991	5.28718	5.3069	6.52205	6.55439	6.74604	6.05158	6.29978	6.40196	5.34341	5.28005	5.40789	5.31648	5.42078	5.35113	5.26385	5.20138	5.31613	5.29267	5.17017	5.24407	5.22887	5.39132	5.1885	5.36553	5.2101	5.2645	6.29606	6.98056	6.47689	5.88466	5.82389	5.96771	5.17695	5.19088	5.16609	5.32518	5.36653	5.37924	5.40059
6030446N20Rik	6.86389	6.51659	6.50628	6.7168	6.58366	6.53034	6.46897	6.22653	6.17444	6.44449	6.31666	6.49599	6.5817	6.26065	6.61907	6.42583	7.03629	6.38508	6.14334	6.00004	6.0808	6.12447	5.89978	6.18417	7.1154	6.57443	6.63609	6.93691	6.78651	7.00681	6.15497	6.41673	6.35421	6.76029	6.54983	6.45358	6.71486	6.74329	6.49548	6.78469	6.7719	6.86003	6.1472	6.37899	6.70682	6.50538	6.11971	6.36005	6.94958
6030458C11Rik	7.25633	7.6626	7.46119	7.26754	7.9448	7.04659	7.32013	7.77167	7.58776	7.54876	7.3453	7.2063	8.83547	8.87016	8.79563	8.82868	8.87011	8.83006	7.27252	7.2321	7.56	7.89149	7.65239	7.73087	7.42094	7.60373	7.73338	7.61066	7.58595	7.32956	7.45946	7.62525	7.65817	7.62606	7.91401	7.62128	8.5895	8.71779	8.58574	8.49957	8.70377	8.82405	7.4589	7.85261	7.5136	7.21782	7.42306	7.3555	7.68661
6030469F06Rik	4.96173	4.9922	5.03073	5.02064	5.12755	5.13593	5.22633	4.93268	5.25092	5.32165	4.91563	5.05354	5.08908	4.93082	5.01932	4.98652	5.05463	5.0122	5.6998	5.5822	5.32237	5.34364	5.13776	5.6209	5.10377	4.93283	5.98044	5.79296	5.24319	5.41265	6.31046	5.42402	5.5307	5.44856	5.79253	5.0597	4.99267	5.03949	5.06289	5.12014	4.97919	4.94382	5.6597	5.54457	5.41389	6.18649	5.15378	6.63192	5.23931
6030498E09Rik	6.09861	5.66189	5.94427	5.8005	5.81361	5.96663	6.5475	6.26165	5.55829	6.55321	6.60645	5.96077	5.43327	5.29113	5.61206	5.30785	5.51694	5.63563	7.59188	7.77569	7.50666	7.95197	8.36872	8.28927	5.57589	5.90831	5.3953	6.18856	5.99749	6.25449	5.80634	6.11386	6.19804	6.3611	5.85452	5.92549	5.6494	5.11313	5.47425	5.36281	5.76574	5.39519	6.98687	7.19506	7.05962	6.41547	7.01213	6.19041	5.50333
6230409E13Rik	5.75178	5.71035	5.96763	5.86369	5.37014	5.63374	6.30537	6.2497	6.58129	5.8396	5.5878	5.94223	5.59192	5.62207	5.55659	5.69899	5.40054	5.34534	5.45564	5.35509	5.64474	5.61277	5.54195	5.31302	5.49705	5.71195	5.79492	5.73203	5.54593	5.64935	5.91545	6.08508	5.92746	5.7796	5.67877	5.75722	5.7581	5.63287	5.78685	5.62711	5.38255	5.71512	5.49045	5.2627	5.31457	5.23223	5.46106	5.58871	5.40073
6230427J02Rik	8.19302	8.44759	7.96749	8.42806	7.75476	8.28164	6.7283	6.59002	7.15442	7.77468	8.26959	6.8556	5.93259	5.67468	5.78113	5.73178	5.76317	5.6707	5.96596	6.0823	5.8447	5.66915	5.70102	5.86417	7.12951	7.36628	8.36199	7.54306	7.79847	8.38097	6.46234	6.78548	6.87456	6.86787	7.01748	7.68422	5.75195	5.69726	5.7226	5.69128	5.70975	5.8082	5.75119	5.5726	5.57446	5.84768	5.85941	5.66593	8.11129
6330403A02Rik	5.40758	5.47898	5.51215	5.44475	5.67483	5.62106	5.59958	5.5773	5.45977	5.45047	5.40711	5.53929	5.61161	5.41072	5.42736	5.63119	5.44233	5.4417	5.67838	5.73048	5.63196	5.63034	5.57124	5.41171	5.42982	5.35215	5.4592	5.54749	5.39858	5.49027	5.64085	5.51137	5.53293	5.49997	5.39971	5.4329	5.49528	5.47807	5.5818	5.41478	5.47641	5.61934	5.30351	5.29235	5.31117	6.23005	5.89352	6.11236	5.45877
6330403K07Rik	9.00723	9.54554	9.09002	9.4417	8.12554	8.36916	11.0984	11.3368	11.5318	10.9154	11.1248	11.1606	7.19842	7.7072	6.29298	7.04823	6.01474	7.40156	9.01571	9.4642	9.00349	9.31348	9.08532	9.6027	9.0591	8.78608	8.30059	8.89693	8.89232	8.72555	10.7382	10.9938	11.0903	10.845	10.9799	10.724	6.07169	6.93908	8.21442	6.61294	6.99592	6.74235	7.58765	7.5326	7.05499	9.59162	10.3341	9.85594	8.74218
6330407A03Rik	7.03838	6.65497	6.47958	6.41773	5.39497	6.33146	5.33633	5.21716	5.47658	5.57939	5.79222	5.36381	5.25033	5.3336	5.27713	5.5411	5.30924	5.34023	5.38107	5.48918	5.38194	5.51789	5.44434	5.47691	6.88697	5.88222	6.77095	6.96798	6.15367	6.37598	5.17496	5.24182	5.32137	5.50526	5.22665	5.48972	5.3764	5.38016	5.48697	5.28939	5.34011	5.44199	5.19549	5.32168	5.28796	5.66864	5.63319	5.5366	6.73241
6330408A02Rik	5.97892	5.86469	5.89353	6.0007	5.79809	5.65216	6.1627	6.10347	6.12472	5.98189	5.74158	5.93105	5.97121	5.81467	5.95931	5.83037	5.76301	5.93454	6.35432	5.92636	6.10964	5.73876	5.99899	6.16137	5.58199	5.88276	6.59156	6.17443	5.93814	6.32062	5.95912	6.03724	6.08203	6.03451	6.09571	6.18581	6.02121	6.15695	5.93816	5.86454	5.97062	6.02718	5.99341	6.06282	5.76362	6.34144	6.04398	6.08132	6.13253
6330409D20Rik	6.50393	5.98781	5.70362	5.73868	5.62636	5.54411	5.4172	5.67105	5.36333	5.28151	5.40957	5.31067	5.23286	5.0713	5.09928	5.31444	5.10644	5.30948	5.04576	5.08948	5.06807	5.19906	5.11041	5.09104	5.63473	5.56626	5.66465	5.74786	6.00482	5.87482	5.18245	5.15129	5.2757	5.23366	5.49575	5.20647	4.99333	5.05363	5.16994	5.22495	5.22743	5.43808	5.06997	5.15398	5.03303	5.0105	5.16111	4.9624	6.13118
6330409N04Rik	6.56379	6.58416	6.63738	6.57945	6.36426	6.46684	6.40666	6.69772	6.72285	6.41195	6.54086	6.44325	6.56236	6.67093	6.65426	6.67462	6.77825	6.94736	6.61694	6.23053	6.5689	6.39376	6.58287	6.68092	6.27512	6.27273	6.62969	6.507	6.40474	6.57605	6.83058	6.36752	6.41263	6.72612	6.09743	6.52785	7.22968	6.76068	6.7393	6.70295	6.71396	6.75981	6.1303	6.29088	6.29292	6.3384	6.66284	6.41857	6.42637
6330416L07Rik	7.6264	7.44994	7.40179	7.67895	7.60359	8.32791	7.04172	6.87571	7.28721	7.67439	7.42586	7.33718	8.19242	8.18616	7.91912	7.61166	7.94263	8.19693	7.25646	7.48884	7.5198	7.38387	7.35155	7.90045	8.26755	8.06056	7.78921	7.64802	7.2914	7.34669	7.38603	7.67224	7.13159	7.11694	7.29586	7.67568	8.22734	7.77038	7.56003	7.89718	7.75851	7.60386	7.59872	7.18185	7.64991	7.81866	8.175	8.00921	7.99711
6330503K22Rik	7.76303	7.66367	7.69498	7.46742	6.87527	7.39709	8.6963	9.24343	8.80019	8.61522	8.86601	8.82995	9.05781	9.22919	9.44503	9.29134	9.04948	9.21535	7.97822	7.54538	8.38797	6.6454	7.60064	7.53926	7.75246	7.21966	7.13913	7.21011	7.91467	7.58278	8.73204	8.25152	8.46049	8.51883	8.73067	8.06329	9.90569	9.81577	9.61823	9.6434	9.77526	9.77643	7.97755	8.03635	7.40196	7.94861	7.43583	8.27799	7.57791
6330577E15Rik	9.47611	9.44511	9.61324	9.52869	9.2825	9.44083	9.41727	9.37388	9.3843	9.42366	9.30802	9.39077	9.57745	9.45211	9.47815	9.49951	9.46633	9.49258	9.34078	9.40948	9.319	9.45119	9.44753	9.3801	9.30685	9.26116	9.61042	9.48641	9.63688	9.70653	9.2998	9.30057	9.348	9.5844	9.37885	9.4324	9.62109	9.47148	9.53666	9.4888	9.69174	9.63365	9.39346	9.45529	9.22195	9.4131	9.26689	9.21901	9.3133
6330578E17Rik	9.63321	9.60402	9.57948	9.78599	9.29095	9.58035	9.70344	9.92881	9.83062	9.44125	9.88015	9.15771	9.53499	9.52702	9.55289	9.85205	9.56347	9.70514	9.854	9.77797	9.53806	9.30827	9.69883	9.78386	9.59587	9.17742	8.99694	9.44663	9.49209	9.44621	9.86332	9.95011	9.0991	9.50716	9.70466	9.81998	9.43042	9.15023	9.22455	9.7382	9.66999	9.66289	9.70425	9.84708	9.77997	10.0338	9.77781	10.0227	9.45129
6430548M08Rik	5.96223	5.90533	6.00222	6.19316	6.02716	6.32108	5.21682	5.28977	5.30138	5.38464	5.25747	5.34166	5.26126	5.15372	5.28054	5.29108	5.19215	5.23161	5.38197	5.43451	5.48772	5.41491	5.37598	5.28641	6.09108	6.09598	6.45814	5.63793	5.89226	5.74043	5.31011	5.36382	5.24642	5.46796	5.20163	5.24993	5.24621	5.426	5.29156	5.35693	5.35283	5.36644	5.36489	5.08729	5.3352	5.42625	5.22401	5.31463	6.73944
6430573F11Rik	5.78996	5.81994	5.82909	5.74971	6.05738	5.7454	5.71883	5.62558	5.82241	5.49241	5.55177	5.52289	5.62571	5.72219	5.65111	5.52354	5.61636	5.60174	5.44333	5.38071	5.43928	5.48348	5.34813	5.53402	5.82419	5.67951	5.7138	5.68822	5.70122	5.7567	5.72364	5.60409	5.5048	5.81461	5.82516	5.63738	5.79009	6.26639	6.04361	5.57154	5.57313	5.49849	5.53699	5.43284	5.48594	5.53573	5.45468	5.47427	6.0735
6530401D17Rik	7.44816	7.5013	7.79111	7.98632	8.5603	8.4495	7.86625	8.74823	9.03296	9.43727	8.3992	7.75716	5.90854	6.4666	6.09101	6.65391	6.604	6.32745	8.11317	8.33985	8.15284	9.23054	9.19862	8.47216	7.2945	8.70119	7.2947	7.82187	8.89611	8.40519	7.99593	8.93728	8.69425	8.54832	8.50613	8.77329	7.26565	6.16006	7.01927	6.74477	6.59898	6.39175	8.56361	8.84783	8.80854	7.78679	8.70586	7.826	8.03589
6530401N04Rik	7.59744	7.86886	7.83522	7.8168	8.12904	7.84647	7.53604	7.87609	7.91556	7.7505	7.7019	7.73238	8.16641	8.72972	8.38109	8.34513	8.36905	8.741	7.25524	7.48319	7.54032	7.68017	7.44294	7.42345	7.71941	7.95705	7.71824	7.56431	7.50198	7.64962	7.80331	7.57335	7.58887	7.62595	7.76678	7.62147	8.49404	8.54398	8.13556	8.38302	8.3051	8.0336	7.67536	7.59339	7.84158	7.8676	7.7514	7.72073	7.66588
6530418L21Rik	6.28274	5.99729	6.19542	6.144	6.95949	6.11933	5.79057	5.88951	5.76592	5.81763	5.78067	5.88957	6.01031	5.82353	5.90227	5.96032	5.94727	5.79841	5.98687	6.1852	5.96841	6.43018	5.93387	5.89905	5.84555	5.96451	6.25231	6.19243	5.94712	5.95366	5.7724	5.83178	5.80745	5.90346	5.95258	5.8009	5.96509	5.76318	5.77519	5.86105	5.87185	5.90006	6.358	6.01739	6.13172	5.92375	5.91519	5.83192	6.17842
6720401G13Rik	9.21088	9.08436	9.15527	9.00503	9.46846	9.39215	9.00852	9.38397	9.14039	9.04455	9.47136	9.03192	9.27721	9.58482	9.54605	9.30729	9.57668	9.67789	9.69355	10.0505	9.9677	9.79475	9.86164	9.69647	9.29892	9.1278	9.34883	9.26466	8.99603	8.93384	9.09494	9.3068	9.37435	8.86245	9.30976	8.69757	9.14821	9.02841	9.00372	8.95098	8.8384	8.72018	9.61139	9.31514	9.29569	10.1985	9.80419	10.0286	9.06765
6720416L17Rik	5.37118	5.12214	4.90965	5.08464	5.09797	5.4203	7.03812	5.98437	8.13596	7.53787	6.49117	6.29647	4.92672	5.09924	4.90447	4.95987	4.90745	4.89147	5.10214	5.07552	4.93913	5.13094	5.16637	5.00743	5.01432	5.37587	5.08274	5.1231	5.344	5.14678	6.18383	6.79737	7.56241	7.95014	8.71077	6.95912	4.92814	4.95547	4.95496	4.95298	4.9871	4.85916	4.87275	4.87307	4.84279	4.9019	4.9263	4.8846	5.11726
6720456B07Rik	10.1055	10.3858	9.99508	10.3469	10.7968	10.4859	10.2558	10.148	10.195	10.265	10.3126	10.2843	9.92801	10.1466	10.0643	10.208	10.135	9.9981	9.99462	10.181	9.93787	10.2849	10.2645	10.2943	10.4786	10.2597	10.1414	10.2969	10.2998	10.1919	10.188	10.2506	10.0967	10.3011	10.1064	10.0108	10.039	9.89684	9.82238	9.9954	10.1149	9.88548	10.2066	10.4897	10.4974	10.0473	10.2019	10.0436	10.6845
6720456H20Rik	6.90317	7.00603	6.63303	7.10585	7.1011	6.77316	6.93994	7.16094	7.29667	7.04166	7.56711	7.38429	6.38863	6.47381	6.32812	6.4516	6.4007	6.51605	7.07675	6.89866	6.84854	6.90945	7.2439	6.97208	6.89249	7.27712	7.11288	6.69942	6.90225	7.12393	7.07838	7.61761	7.48545	7.62834	7.7416	7.52562	6.54728	6.29474	6.65792	6.48002	6.64039	6.53549	7.66337	7.81828	7.4021	6.83685	6.34809	6.76392	6.74137
6720463M24Rik	8.78343	8.69381	9.04361	8.92787	6.87574	8.07038	8.3564	8.5058	8.31566	8.27954	8.31195	8.43443	8.81718	8.83862	8.80163	9.06503	8.89031	9.18305	6.84536	6.95131	6.22937	7.19451	6.83744	6.64518	8.7847	7.49744	8.0418	8.45643	8.43722	8.43976	7.80256	7.98035	7.62845	8.13965	8.21497	8.29862	8.55295	8.33032	8.26477	8.91076	9.03544	8.98359	7.97621	7.86599	8.1349	6.37063	6.76028	6.56006	8.23499
6720489N17Rik	8.84392	9.842	8.7378	9.31305	7.82923	9.45048	9.79147	9.42034	9.76794	9.18294	10.2442	9.7386	8.124	8.18669	8.51042	9.09202	9.08839	8.82006	8.06399	7.03428	8.592	6.51083	8.18923	8.36005	8.96912	7.72327	6.91952	8.81691	8.21839	8.56412	9.78712	9.73134	9.12491	8.74613	9.55927	10.0227	6.94503	6.92644	7.99278	8.80741	8.50013	7.39161	7.73736	7.36288	8.72871	8.77751	9.16541	9.18408	9.71884
7120432I05Rik	5.84539	5.97865	5.94037	5.85943	6.1617	6.35521	5.72245	5.71566	5.64618	6.24719	5.97353	5.75943	5.84738	5.8003	6.00173	5.72326	5.8462	5.78515	5.841	5.83013	5.77465	5.77705	5.80486	5.77431	6.08871	6.20628	5.88456	5.93095	5.82772	5.80781	5.82961	5.81152	5.6531	5.73479	5.77311	5.85947	5.6226	5.77221	5.77347	5.70458	5.67548	5.82954	5.91003	6.00894	5.85238	5.82515	5.79471	5.71569	5.92928
8030411F24Rik	4.95504	5.02642	4.93677	5.05733	5.45583	4.94291	5.02811	5.06503	5.23	6.51183	4.83897	5.39286	5.08005	5.12381	4.99404	4.95769	4.76126	4.77844	5.42987	6.36547	5.81156	6.0573	8.39435	7.51131	4.82678	5.02737	5.13837	5.67914	5.60187	5.16894	5.20214	5.37324	4.71371	9.17337	9.02541	7.88123	5.16745	4.93938	5.43282	4.87687	5.35533	5.13373	11.6592	11.4139	11.2838	5.95822	5.30995	6.29148	5.25529
8030462N17Rik	6.52058	6.57063	6.43089	6.49134	6.34418	6.55436	6.5073	6.25348	6.56795	6.27128	6.88899	6.34841	6.67648	6.49309	6.34344	6.58971	6.49962	6.55418	6.22869	6.44351	6.6191	6.31884	6.67759	6.42932	6.61482	6.76255	6.16389	6.99568	6.63302	6.57969	5.93298	6.62206	6.49803	6.46384	6.52815	6.81737	6.57653	6.95388	6.95219	6.59303	6.83688	6.92508	6.13859	6.52407	6.53737	6.31846	6.35416	6.20117	6.40246
8030463A06Rik	5.1014	5.02769	5.06299	5.06258	5.24144	5.04356	5.04569	5.07324	5.0504	5.00498	5.085	5.03763	5.00583	5.0522	5.00179	4.97493	4.96143	5.07184	5.09062	4.99789	5.01684	5.05951	4.94963	5.03763	5.22473	4.94075	5.28241	5.77434	5.24462	5.33025	4.89279	4.95094	5.02924	5.36846	5.03659	5.02377	5.02158	5.02907	4.88359	5.05516	5.06148	5.0535	5.15922	5.04493	5.29092	5.00652	5.17786	5.01391	5.13854
8030474K03Rik	5.49164	5.83448	5.70607	5.68311	5.98998	5.68483	5.55529	5.41924	5.56965	5.89781	5.49748	5.66166	7.19594	8.06967	7.44763	6.93397	7.34556	7.21493	5.59052	5.48308	5.44262	5.90311	5.82011	5.87078	5.54592	5.71099	5.67448	5.74191	5.66379	5.49974	5.75111	5.48607	5.50685	5.57351	5.59799	5.367	7.43314	7.47865	7.38543	7.69039	7.55759	7.86088	5.52495	5.69785	5.66656	5.40547	5.55123	5.57265	6.0812
8430406I07Rik	6.21164	6.16802	6.1206	6.09271	6.06848	5.6922	6.50467	6.03535	6.4682	6.29667	6.28317	6.13795	7.10445	7.49805	7.53977	7.25761	7.74386	7.47322	5.95888	5.81762	6.11536	6.16713	6.27182	5.99546	6.09061	5.76888	5.73923	6.04176	6.04939	6.12399	6.2112	6.06651	6.15073	6.20864	6.4109	5.99702	7.08346	7.88431	6.4938	7.16753	7.26006	6.96575	6.02582	6.20856	6.16507	6.27558	6.66656	6.08958	6.32514
8430408G22Rik	6.13463	6.06716	6.35505	5.91883	6.28139	5.66103	5.08016	5.25352	5.33714	5.06904	5.28689	5.19486	5.22681	5.13054	5.28546	5.16867	5.24797	5.32879	5.12832	5.15964	5.16238	5.14315	5.33149	5.16846	5.96169	5.80128	5.44684	6.40516	6.08712	6.6507	5.03442	5.15884	5.05975	5.14045	5.13724	5.20407	5.2081	5.20943	5.21698	5.13946	5.22825	5.22126	5.08873	5.25069	5.20171	5.18762	5.19359	5.18382	6.45754
8430410A17Rik	7.54065	7.6745	7.59822	7.50077	7.53717	6.94666	7.43293	7.44629	7.17476	7.49903	7.17192	7.15507	9.18791	9.07839	9.14337	9.04548	8.89025	8.9018	7.80899	7.52228	7.29652	6.43909	7.61078	7.60872	7.6301	7.37921	7.17907	7.08405	7.55396	7.33853	7.51769	7.88237	7.45942	7.24699	7.43995	6.9315	8.58989	8.41827	8.39603	8.02939	8.33179	8.18771	7.37786	7.75788	7.62458	7.23186	8.24809	7.42565	7.67884
8430410K20Rik	8.13111	8.30967	8.24213	8.17937	8.85741	8.05829	8.50182	8.79683	9.00752	8.88673	9.2043	8.84678	7.69222	7.6361	7.71804	7.95887	7.35165	7.63294	8.75704	9.0105	8.79382	8.54072	8.93519	8.60937	7.78816	7.64508	7.45991	7.81303	8.25824	8.31732	8.47124	8.6481	8.75335	8.6725	8.88105	8.87068	7.13232	7.03757	7.34211	7.56063	7.61395	7.59531	8.58672	8.86628	8.20198	9.06162	9.12255	9.16763	7.74426
8430419L09Rik	5.71749	5.70024	5.56978	5.8295	5.70319	5.66978	5.79245	5.59762	5.59947	5.53264	5.82751	5.54457	5.6834	5.68049	5.67951	5.58655	5.70504	5.50554	5.88003	5.48809	5.72044	6.04696	5.73558	5.53532	5.53029	5.7555	5.57775	5.76531	5.81604	5.73621	6.05012	5.87613	5.65947	5.67186	5.89564	5.87702	5.69357	5.95838	5.88052	5.74896	5.85419	6.0114	5.60009	5.56219	5.69671	5.76078	6.06054	5.90166	5.60544
8430426H19Rik	7.29797	7.20184	7.23495	7.6405	6.90443	6.91572	7.88408	8.27028	8.16777	7.97355	7.17146	7.98564	7.10723	7.28253	6.97106	7.60054	7.12885	7.19694	8.75525	8.36728	8.33684	7.7499	7.81467	7.52222	7.41757	7.30602	8.47186	6.91642	7.34224	7.27207	7.54451	7.89518	7.62356	7.63109	8.13207	7.46833	6.91011	6.69637	7.07214	7.07246	7.17678	7.03286	7.44513	6.9044	7.71273	8.61814	7.77614	8.62438	7.75596
8430427H17Rik	6.65024	7.1415	7.16251	6.60591	6.25096	6.40511	6.88758	6.62309	6.81972	6.78422	6.46768	6.97902	6.02432	6.07187	5.92336	5.82622	5.54794	5.8087	7.06456	7.12006	7.11425	6.96346	7.53118	7.33431	6.66229	7.07758	6.52612	6.47267	7.03976	7.02704	6.75639	6.97078	6.39494	6.82719	6.45176	6.82983	6.08143	6.13132	6.09315	5.68313	5.63969	5.95614	7.39361	8.04658	7.72474	7.43663	6.93239	7.21396	6.39161
9030224M15Rik	6.04239	5.99206	6.10179	5.94724	6.0251	5.76269	7.68626	7.32876	7.72221	7.70124	8.20255	7.59975	5.89263	6.22947	5.70807	5.87038	5.91672	5.78393	10.2287	10.2802	10.0776	8.28676	9.44324	9.67915	6.20071	5.86204	5.96006	6.42957	6.4959	6.29101	7.99405	8.09503	8.70623	6.58602	6.87519	6.60997	5.91308	6.04835	6.02044	5.85854	5.69606	6.01979	8.18028	8.14709	8.57383	9.38978	9.62984	9.37888	5.77614
9030420J04Rik	7.65295	7.59496	7.8784	7.5401	7.3111	8.22235	7.57567	7.28403	7.54449	7.64052	7.00743	7.33256	8.38539	8.39137	8.70042	8.19135	8.22412	8.35968	7.91493	7.39077	7.7635	7.16926	7.24862	7.25864	7.80815	7.30007	8.23266	7.72414	7.75559	7.65961	6.90231	8.09353	7.48624	7.72931	7.80464	7.80017	7.98746	7.90991	7.86176	8.91443	8.51214	8.96151	7.07612	6.13341	6.92507	8.3034	7.97308	8.40822	7.78431
9030420J04Rik	8.71006	8.68228	8.52779	8.59605	8.39106	7.89207	9.44699	9.48275	9.1197	9.25272	9.24587	9.30877	10.2879	10.2509	10.4012	10.4332	10.3988	10.5092	8.4093	8.18823	8.76291	8.89909	9.03418	8.35598	8.90638	8.9782	8.31674	9.32471	8.93373	9.05136	9.85779	9.54872	9.37754	9.36094	9.24839	9.37606	9.8971	9.75492	9.78314	10.3457	10.2998	10.5044	7.65413	7.3068	6.81893	9.8622	9.67191	10.0379	8.61989
9030425E11Rik	5.40562	5.75196	5.47508	5.6231	5.481	5.78212	7.90951	8.17164	8.49485	8.02848	8.07434	8.70258	5.26098	5.19518	5.27551	5.2318	5.16056	5.27469	6.53856	6.03101	6.37322	5.81023	5.40364	5.58019	5.44232	5.58124	5.32179	5.49127	5.39931	5.41497	7.32607	7.14314	7.21949	7.05858	7.99915	8.00184	5.21795	5.22886	5.26659	5.37764	5.37452	5.28757	5.06141	5.07038	5.11251	6.12889	5.73957	6.00642	5.19861
9030624J02Rik	8.17333	8.42448	8.29807	8.43523	8.41488	8.23157	8.12506	8.76083	8.15374	8.12243	8.69237	8.43014	7.752	7.80698	8.20686	7.97036	8.07559	8.25852	8.25646	8.28664	8.33218	7.94698	8.38452	8.34199	8.52568	8.32852	8.0134	8.36878	8.14408	8.10399	8.42462	8.4548	8.68235	7.93143	8.53136	8.56993	8.12568	8.20991	8.04205	8.14522	8.21033	7.7423	8.15806	8.77249	8.65932	8.58811	8.78339	8.69962	8.23678
9030625A04Rik	8.40422	8.3946	8.34336	8.19594	7.21377	8.09365	7.28944	6.76538	7.2505	6.79425	6.68582	6.87614	5.95771	5.96232	6.50602	5.99541	6.33205	6.36706	5.92729	5.74668	5.77186	6.06868	7.03622	5.68798	7.67591	7.90712	6.21673	7.60274	7.69227	7.16148	7.12019	6.99464	7.05016	6.99637	7.87193	7.63992	6.92317	7.37052	6.38462	6.46855	6.68019	5.97549	6.81532	7.45026	6.83372	6.18287	6.11456	5.98441	6.72194
9130011E15Rik	7.89699	7.43359	7.74006	7.68112	7.78735	7.03902	7.80552	7.70887	7.5371	7.56497	7.54178	7.91338	8.01122	8.76888	8.51548	8.23857	8.28629	8.68674	8.05853	7.66198	8.01983	7.42744	7.75632	7.3686	7.48617	8.08417	7.29847	7.5787	7.64972	7.68805	8.0188	7.80646	7.57519	7.17559	7.49184	7.31547	8.55778	8.46784	8.37811	8.52941	8.393	8.65992	7.37359	7.6839	7.67367	8.02072	7.22587	7.72465	7.02548
9130011J15Rik	10.0849	10.2447	9.94791	10.1858	9.6577	9.76529	10.6442	10.5403	10.4061	10.5384	10.8155	10.6619	9.93315	9.93734	9.90081	10.3073	10.2373	10.0881	10.2906	10.411	10.4177	10.8698	10.3516	10.3965	10.0107	9.50194	9.96777	10.1739	10.1669	10.0746	10.8473	10.46	11.0477	10.919	10.9771	10.7984	9.8886	9.78486	9.753	9.87688	10.3062	9.83119	10.1905	10.5779	10.6805	10.4193	10.7226	10.0068	10.1625
9130023H24Rik	6.66774	6.59547	6.66792	6.54359	6.72601	6.74742	6.65576	6.4295	6.5584	6.71462	6.47591	6.52592	6.68997	6.28776	6.50732	6.56661	6.47098	6.46542	7.53476	7.08459	6.74142	7.24359	6.62616	6.93858	6.43534	6.79009	6.65501	6.93368	6.63829	6.63148	6.57599	6.61202	6.45378	6.95148	6.85314	7.06892	6.55609	6.42258	6.59573	6.45543	6.74267	6.4891	6.89159	6.67016	6.77134	6.75314	6.86796	6.98579	6.68385
9130401M01Rik	6.99025	7.08261	7.05813	7.03055	6.96665	7.16824	7.17026	7.28221	7.20054	7.16857	7.258	7.11364	8.23054	8.5968	7.94734	8.28857	8.4649	8.1546	7.65801	7.41672	7.28547	7.265	7.27804	7.35287	6.74243	6.7362	7.05023	7.20206	6.97176	7.2954	6.93422	7.38333	7.02768	6.97535	6.82506	6.99572	8.36553	8.19684	8.32929	8.55583	8.65696	8.25466	7.16965	7.44036	7.03677	7.05782	7.66673	7.25669	7.35563
9130404D08Rik	6.96155	7.06302	7.00968	6.98742	6.56864	7.41336	7.18344	7.01607	6.9495	6.85924	7.08353	7.41729	7.38752	7.17358	7.30032	7.09918	7.11587	7.22101	7.54557	7.5914	7.26328	7.04044	7.22906	7.17359	7.1355	7.08038	6.81448	7.04788	6.98775	6.74227	7.27781	7.1902	6.85733	7.17074	7.13198	7.1155	7.22824	7.16433	6.98326	7.19509	7.39272	7.32943	7.09213	7.24792	7.53798	7.46224	7.1656	7.13053	7.04328
9230104L09Rik	5.01908	5.07203	5.0765	5.02563	5.36301	5.169	5.20583	4.96613	4.98632	5.28837	5.09589	5.03114	5.02982	4.99422	4.99296	5.11633	5.02009	4.99235	5.31397	5.37406	5.52226	5.53819	5.21252	6.32148	4.99907	5.24908	5.17189	5.00938	5.04192	5.06926	4.99106	5.0623	4.95738	4.9766	5.7309	5.16378	4.97183	4.89928	5.03564	5.02433	4.97301	5.02271	6.88892	7.5729	5.71053	4.96875	5.15584	5.20665	5.03024
9230105E10Rik	5.48259	5.66862	5.40602	5.59393	5.6844	5.56359	5.30254	5.39016	5.32877	5.10532	5.35765	5.05582	6.15159	6.94704	6.44572	5.96228	6.41066	6.36281	5.88454	5.7201	6.18726	5.45148	5.6617	5.14447	5.78153	6.30442	5.81016	5.76702	5.55929	5.52521	5.16321	5.22314	5.13183	5.66446	5.38396	5.15241	6.99033	6.70785	6.31581	6.64288	6.98409	7.0593	5.6477	5.17253	5.45617	6.05282	7.17362	5.46409	4.997
9330132A10Rik	5.25042	5.26487	5.17577	5.21655	5.79615	5.47904	5.34169	5.12712	5.44679	5.38558	5.44114	5.90889	4.99091	4.92322	5.0514	5.09307	5.22113	5.14336	5.1868	5.22843	5.26283	5.25918	5.10446	5.14979	5.3865	5.33387	5.11395	5.2256	5.26081	5.17203	5.58416	5.44399	5.44351	5.31303	5.22541	5.4987	5.04762	5.22912	5.30645	4.97792	5.22795	5.13885	5.43697	5.58569	5.36894	5.27968	5.6051	5.65923	5.19504
9330133O14Rik	6.03513	6.06195	6.05416	6.00502	5.8992	6.19167	5.96907	6.01238	5.92144	5.92156	5.98307	5.77554	5.80305	5.74414	5.7321	5.82869	5.81728	5.88235	6.08595	5.96121	6.27569	5.954	6.07241	5.81323	5.90969	5.94722	6.07373	6.14951	5.80497	6.02729	5.86072	6.0233	5.7818	5.94443	5.8339	5.83448	5.71511	5.95852	5.68872	5.95509	5.77628	5.88794	5.85191	5.83092	5.78995	6.36343	5.97768	6.15334	6.00659
9330151L19Rik	6.50901	6.20063	6.38353	6.24198	6.20426	6.25529	6.3618	6.27599	6.32545	6.43512	6.33649	6.38002	6.46977	6.47499	6.35616	6.02978	6.4876	6.63142	6.24755	6.54505	6.63911	6.42222	6.44862	6.17374	6.23297	6.46998	6.72329	6.56031	6.007	6.00837	6.22731	6.43756	6.55819	6.67138	6.46756	6.41031	6.61658	6.72365	6.2822	6.56882	6.53323	6.47006	6.44822	6.37131	6.34674	6.42272	6.43294	6.39712	6.04423
9330171B17Rik	5.72098	5.84715	5.86006	5.70477	6.30201	5.65366	5.95221	6.13934	5.93752	6.06298	5.97551	6.04131	5.78831	5.5964	5.89455	5.85504	5.65445	5.79488	6.07964	6.04622	5.7392	6.24937	6.01997	5.80173	5.62808	5.79905	5.96577	5.93941	5.78231	5.81252	6.05108	6.08923	5.94158	6.18082	5.91752	6.28517	5.90701	5.94955	5.85845	5.68077	5.79465	5.9028	5.75078	5.73668	5.97784	5.9855	5.98295	6.06701	5.91691
9330176C04Rik	6.22046	6.13848	5.95707	6.09288	5.88594	5.97029	6.13407	5.8854	5.88852	5.99513	5.94639	5.81078	5.94747	6.05472	5.82512	5.87006	5.87733	6.01333	6.1812	6.129	6.06369	5.94337	6.051	5.94226	6.04106	6.14315	6.33328	6.06858	6.11152	6.08481	5.65123	5.94963	5.97103	6.1156	5.90862	5.90562	5.8263	5.78413	5.76709	6.05296	5.78764	6.02499	6.33751	5.99873	5.79849	5.89625	6.19781	6.15832	5.7433
9430008C03Rik	6.03615	6.0515	5.90506	6.04113	5.62674	5.71575	6.00287	6.179	5.86426	5.75361	6.12845	6.51231	6.25944	6.32021	6.8976	6.28863	6.2157	6.00941	5.80106	6.71805	5.78824	5.97933	5.81052	5.66297	5.88707	5.66168	5.82389	5.77744	5.71039	6.00696	6.07613	5.90969	6.30956	5.94311	5.98363	5.82471	6.04862	6.30794	6.16235	6.70891	6.3718	6.27493	5.84282	5.77792	5.83944	6.04972	6.48858	5.85388	6.04584
9430008C03Rik	5.92727	5.68674	6.26101	5.60193	7.03159	5.76663	5.84229	6.29793	5.79817	5.97452	5.81894	5.90786	6.4384	6.82702	6.16777	6.29563	6.52191	6.16408	5.74691	5.85124	6.02611	7.19128	5.72062	6.22892	5.74976	5.83755	5.7599	5.94399	5.92389	6.01199	6.28468	6.13406	6.60093	5.99442	6.35811	5.9328	6.67376	6.53068	6.49182	6.72114	6.43342	6.77643	5.7531	5.56987	5.70025	5.78126	5.68907	5.78449	5.98497
9430008C03Rik	6.42661	6.31789	7.05559	6.04211	7.51481	7.2361	6.35788	6.34366	6.1794	6.46154	6.14885	5.8912	6.91102	7.0582	6.67581	6.9155	7.19483	6.68152	6.6671	6.27664	6.32648	6.03076	6.17117	6.60773	6.56073	7.0412	7.1343	6.46027	6.55787	6.49447	6.92499	6.60072	6.52927	6.55049	6.48432	6.38105	6.86205	6.7684	6.60956	7.19825	6.81998	6.84009	6.42054	5.77085	5.9162	6.67971	5.75818	6.28919	6.47611
9430015G10Rik	5.80483	5.88725	5.72875	5.75831	5.49056	5.71228	6.07737	5.87414	6.0089	5.85101	6.06425	6.08449	6.04781	6.26372	5.98963	6.07245	5.85555	6.34468	5.91122	5.81479	5.69775	5.82482	5.87161	5.81702	5.8905	5.82721	5.96038	5.72981	5.50589	5.76271	5.79197	5.91078	5.91583	5.79122	5.90456	6.03429	6.15581	6.26591	6.06226	6.10846	6.35957	6.27017	5.85452	5.97045	5.73542	5.85838	5.97492	5.68209	5.9942
9430016H08Rik	7.8195	7.70527	7.71133	8.04051	8.66754	8.08471	7.52477	7.76851	7.75273	7.85003	7.24883	7.07284	7.35017	7.74505	7.63613	7.58356	7.62909	7.56649	7.26467	7.57414	7.32563	6.92277	7.81905	7.46345	7.60488	7.90354	7.64356	7.99282	7.48099	7.6147	7.383	7.73135	7.52015	7.60186	7.87689	7.18212	7.37341	7.03276	7.1395	7.64695	7.38055	7.38985	8.08732	8.00383	7.67599	8.33676	7.1431	7.39975	7.50392
9430020K01Rik	7.55026	7.34066	7.61747	7.47863	6.77493	6.51823	6.64406	7.03399	6.04113	7.10853	6.84399	6.8895	6.39176	6.25454	6.34525	6.04035	5.651	6.53883	7.34865	7.30171	7.27888	7.2401	8.25279	7.99237	7.9404	7.1188	7.14918	8.07355	8.3104	8.44593	6.58433	6.62915	6.52431	7.21631	6.95792	6.75956	6.20692	6.33424	6.52858	6.67757	6.77852	6.00704	7.8844	8.35646	8.03916	7.63932	7.09829	7.3611	8.23303
9430023L20Rik	8.38217	8.47762	8.21221	8.34801	8.79667	7.94904	8.13487	8.15591	8.11991	8.27586	8.41916	8.29302	8.89311	9.01559	9.01055	8.65434	8.91556	8.96332	8.12566	8.73461	8.47502	8.42847	8.79406	8.37395	8.23383	7.61922	7.54354	8.29577	8.33319	8.47285	7.73842	8.17961	7.69162	8.01474	8.27022	8.46664	8.49782	8.71607	8.64671	8.79666	8.80881	8.71802	9.21662	9.62081	9.60565	8.24333	8.75998	8.2069	8.4785
9430025C20Rik	7.00597	7.26783	7.40367	6.36932	6.26805	6.77297	5.9335	5.95023	5.76967	6.05185	6.06791	6.14514	6.65618	5.85039	5.70111	5.81644	6.07525	6.59888	6.13341	5.9289	6.05899	5.52978	5.54277	5.7718	7.29293	6.51287	6.60397	6.23614	6.80622	6.45261	5.77935	6.35158	5.6739	6.18754	6.03329	6.30289	5.59795	5.54728	5.68611	6.06351	6.11155	5.70562	6.10222	6.22268	6.06056	5.88175	5.5775	5.75679	6.12547
9430038I01Rik	7.45758	7.38233	7.30587	7.60769	7.64965	7.05437	7.33526	7.4357	7.55314	7.65912	7.31223	7.58993	7.97751	7.80844	8.02776	8.40014	8.29191	7.89779	7.72003	7.80779	7.52367	7.15614	7.43981	7.52001	6.94731	7.40852	8.1819	7.25062	7.56189	7.35083	7.43587	7.4543	7.18886	7.18979	7.95091	7.13104	8.17743	8.06909	7.91725	8.43949	7.92806	8.07929	7.359	7.42152	7.48621	7.45601	7.17239	7.5727	7.23232
9430053O09Rik	7.69582	7.25714	8.50214	7.4791	8.73139	8.3194	7.39231	6.11853	6.75671	7.34804	8.67502	6.53689	6.27319	6.16341	6.45963	6.16843	5.89946	6.40023	8.0244	8.70518	7.44347	8.29388	7.98783	7.87986	8.06327	7.85841	7.96813	7.15156	7.25869	7.40826	7.30447	7.16323	6.553	7.06069	6.64112	6.74295	6.37482	6.25674	6.16497	6.46774	6.07327	5.99785	7.65423	7.09499	6.81984	8.27389	6.29524	7.56641	6.2197
9430077A04Rik	5.90877	5.7484	5.86556	5.77374	5.8501	5.77172	5.92615	5.89339	5.68907	5.74803	5.79919	5.74217	5.99619	5.82037	5.92283	5.99849	5.91154	6.01221	5.7043	5.92861	5.94962	6.17756	5.77361	5.84394	5.87353	5.79595	6.10053	6.24213	5.65878	6.12353	5.7627	5.80444	5.76595	5.86432	5.8849	5.85537	5.96864	5.85783	6.02059	5.88203	5.79922	5.96803	5.87738	5.86328	6.04904	5.90322	5.77133	5.96701	5.98707
9530008L14Rik	5.16672	5.28175	5.03672	5.03811	5.14565	5.13456	5.47287	6.45933	6.31973	5.56156	5.25664	5.73048	5.22722	5.44168	5.36863	5.38477	5.24743	5.16308	5.61739	5.39015	5.20263	5.03676	5.16157	5.2509	5.29854	5.09291	5.2644	5.13613	5.10221	5.06178	6.77711	6.2421	5.22839	5.08302	4.96734	5.05914	5.19156	5.22154	5.2277	5.15571	5.14316	5.0594	5.03483	5.02153	5.08815	5.57817	6.49911	5.62814	5.46749
9530009G21Rik	6.88059	6.81627	6.08823	6.17826	6.12951	6.64067	6.70298	6.39479	6.53213	6.22459	6.22909	7.3335	5.45655	5.55633	5.45523	5.43861	5.59232	5.55003	6.46795	5.86064	8.03374	5.7193	6.40569	6.30141	6.55697	6.83721	6.63639	6.38534	6.43326	6.27567	6.87335	6.54965	6.32153	6.32002	6.05179	6.07983	5.68188	5.89741	5.5156	5.44927	5.59412	5.53924	5.58576	5.48562	5.82846	6.46378	6.14386	7.60998	6.13398
9530068E07Rik	7.66259	7.94962	7.43896	7.65624	7.68402	7.5231	8.2449	8.19407	8.07142	8.27077	8.10686	8.3856	6.94129	6.9917	7.06252	7.31942	6.95803	7.01844	8.09648	8.02264	8.07475	8.39137	8.13337	8.32185	7.56042	7.56136	7.41087	7.75397	7.8794	7.76426	8.18716	8.23835	8.35295	8.02308	8.50846	8.4442	7.31149	7.22646	7.26395	7.15163	7.37001	7.38903	8.30563	8.44972	8.97569	7.98352	8.35505	8.13753	7.90388
9530091C08Rik	6.28746	6.34106	6.63917	6.1468	5.66659	7.13762	7.02429	6.3915	6.22408	7.36142	6.19408	6.55592	5.93242	5.81233	5.9492	5.77542	5.71515	5.86182	6.6213	6.15705	6.42889	6.63638	7.53495	6.88526	6.82093	6.30466	6.19123	6.72703	7.14803	6.80978	6.17028	6.37741	6.8009	6.538	6.00613	7.09068	5.62495	5.52081	5.57057	5.72282	5.78361	5.6589	6.38707	5.70893	6.5213	7.04542	7.08285	6.38894	5.98989
9630014M24Rik	6.36444	6.23749	6.44591	6.09503	6.47597	6.56276	6.29173	6.26884	6.09161	6.41865	6.3301	6.35166	6.32133	6.24784	6.18174	6.17948	6.19217	6.37046	6.39726	6.2588	6.40643	6.28331	6.4085	6.27813	6.50428	6.44843	6.69876	6.59688	6.39444	6.40838	6.14583	6.20573	6.09584	6.39686	6.4639	6.36801	6.33293	6.17821	6.21398	6.40177	6.27439	6.25332	6.55363	6.11551	6.1963	6.27172	6.27294	6.11515	6.42795
9630033F20Rik	5.37165	5.43632	5.47744	5.4176	5.40421	5.45827	5.46355	5.26336	5.397	5.35168	5.60562	5.55869	6.12127	6.14782	6.24736	6.10333	6.18985	6.47895	5.56183	5.30636	5.44287	5.49962	5.48995	5.52369	5.50535	5.52276	5.49292	5.53836	5.3977	5.49383	5.45039	5.42727	5.25625	5.49913	5.17578	5.3517	6.66035	6.23768	6.48656	6.45722	6.63249	6.48876	5.47897	5.19385	5.32998	5.52456	5.29907	5.41682	5.36235
9830001H06Rik	6.22549	6.20688	6.18119	6.09895	6.20085	6.27828	6.20544	6.3126	6.32804	6.2378	6.3149	6.71031	5.96454	5.97492	5.84238	6.06542	6.02399	5.8021	6.26013	6.28135	6.23038	6.16259	6.22052	6.26363	6.35581	6.57045	6.84651	6.33929	6.30534	6.27732	6.44406	6.38749	6.34958	6.47615	6.29642	6.41312	6.06768	6.08498	5.98339	5.97541	5.96705	5.9888	6.33286	6.46785	6.45349	6.61141	6.67317	6.18988	6.5051
9930005F22Rik	5.93709	5.9312	5.99109	5.93507	5.95299	6.16782	5.83547	5.85281	5.81739	5.90196	5.74212	5.84527	6.04354	5.87714	5.85664	5.9617	5.90622	5.98605	6.07259	6.16526	5.87701	5.95605	6.01579	5.92069	5.78646	5.92067	6.00121	5.96313	5.7974	5.93448	5.86937	5.92003	5.94434	6.16796	5.87101	5.96358	5.93364	5.75455	5.94397	5.93159	6.03075	5.98518	5.75033	5.68432	5.73186	5.93095	5.93936	6.06739	6.04562
9930013L23Rik	4.86218	4.84538	4.92468	4.77827	5.01944	4.92209	4.91182	5.08409	4.87849	4.95521	5.04603	4.96279	4.86372	4.85108	4.85746	4.83346	4.75642	4.87813	4.99413	4.968	4.98577	5.18551	5.29262	5.2779	4.80685	4.83404	5.03777	4.93033	4.91393	4.74755	5.06959	4.95616	4.83075	4.98077	5.00821	5.21838	4.86509	4.8089	4.89426	4.93471	5.04143	4.84473	6.07774	6.46314	8.01641	5.02324	5.11598	4.95621	4.90955
9930021J03Rik	9.34262	9.18502	9.15906	9.61833	8.32957	9.39137	9.40921	9.2455	9.40224	9.28953	9.01094	9.00006	9.46783	9.42947	9.21608	9.40714	9.48628	9.30194	8.95857	9.13636	9.17106	8.67258	8.76283	8.96019	9.76741	9.17942	9.14921	9.40132	9.0075	9.01164	8.75028	9.28956	8.94023	8.83107	9.15778	9.35159	9.72618	9.67269	9.35125	9.70435	9.73353	9.50358	9.19535	8.69461	8.99374	9.30673	9.46485	9.32634	9.51449
9930021J03Rik	7.02235	7.28326	7.14391	7.23531	5.64854	7.0418	7.04971	7.48695	7.17036	7.15931	7.34649	7.30481	7.29224	7.60487	7.51015	7.50637	7.40879	7.31074	7.19983	7.46532	7.37624	7.26856	7.36982	7.22841	7.028	6.55182	7.48485	7.217	7.1539	7.15569	7.30486	7.19974	7.42916	7.20146	6.50452	7.38178	7.76186	7.84034	7.33038	7.22719	7.58215	7.70361	7.42627	7.11918	6.61268	7.18943	6.4248	7.15867	7.15188
9930104L06Rik	5.85733	6.20412	6.09765	5.95892	6.18911	5.75866	6.07184	5.96531	6.1297	6.14544	6.11083	6.03677	6.46501	6.039	6.27395	6.4816	6.69879	6.28346	6.32436	6.68485	6.28759	6.34432	6.15231	6.37298	6.24729	5.90367	5.75231	6.41231	5.82228	6.50089	6.08666	6.12584	5.81038	6.00026	6.10279	6.27989	6.36388	6.18474	6.28678	6.47198	6.31261	6.30058	6.51605	6.03274	6.58184	6.44968	6.17903	6.46879	6.71779
A030009H04Rik	6.00239	6.17854	6.0637	5.94475	6.38955	6.43224	7.13777	7.22746	7.75203	7.2808	7.28202	6.95651	6.9822	7.25362	7.36672	6.35674	6.6467	7.04018	7.20356	6.9321	8.11518	6.40116	6.86295	7.13351	6.15055	6.28298	6.3595	6.28574	6.23746	6.17421	7.25077	6.98111	7.26997	7.01296	6.73525	6.90684	7.51325	7.82991	7.32799	6.71995	6.73043	6.57909	6.00133	6.16472	6.68019	6.93134	7.61714	7.5567	6.74841
A130010J15Rik	6.10672	6.37332	6.08292	6.08025	6.10896	6.35983	6.29431	6.32205	6.29062	6.43261	6.02188	6.06138	6.38502	6.37678	6.54543	6.51146	6.35876	6.7079	6.0673	6.36088	6.18239	5.9331	6.32229	6.13173	6.08423	6.15138	6.25936	6.07396	6.00926	6.08326	6.2598	6.22367	6.60728	5.99934	6.36994	6.18476	6.65321	6.82954	7.08355	6.51818	6.67277	6.63827	6.14956	6.38776	6.29275	6.0947	6.21707	6.15227	6.15462
A130014H13Rik	5.8424	5.73445	5.91985	5.86401	5.8392	6.18485	5.95755	6.07924	5.61023	6.48533	5.45838	5.60253	7.50012	7.29777	6.90708	5.8145	5.87315	6.20038	6.74002	5.94485	6.29348	5.84482	6.73996	6.47986	5.91564	5.87005	6.03065	5.7522	5.87037	6.0718	6.00485	6.2706	6.5159	6.08122	5.84435	6.07208	6.69369	6.5092	6.44588	6.25578	6.70061	6.19742	6.87054	6.14647	5.9497	6.52061	6.51298	6.29594	5.70022
A130022J15Rik	10.1775	10.3173	10.2447	10.5178	10.1896	9.90287	7.36512	6.98567	7.16949	7.24231	6.93603	7.60079	7.36559	7.15562	6.92152	6.93299	7.58624	6.90311	6.62852	6.7143	7.30989	6.96694	6.87729	6.73129	10.7399	10.8434	11.0237	10.9677	11.2196	11.1164	7.12894	7.50867	7.33489	7.89458	8.00274	8.07521	6.0967	5.814	6.70321	6.59595	6.28003	6.89553	7.46482	7.59304	7.73586	6.97742	6.5068	6.63333	10.9186
A130049A11Rik	5.73123	5.80041	5.44463	5.64077	5.24491	6.9956	5.52693	6.09139	5.21064	5.43461	5.68588	5.29492	4.99521	7.38451	6.54977	5.23822	5.33236	5.90476	6.1614	5.30778	5.47262	5.40294	5.62416	5.31599	5.09041	5.27614	5.1367	5.43006	5.74014	5.81081	6.32097	5.4208	5.31372	7.12674	5.53204	5.3927	6.36248	5.57537	5.42555	5.67476	5.71727	5.47964	6.15715	6.04276	5.78784	5.74416	5.09337	5.33515	5.16111
A130050O07Rik	6.15101	5.80972	5.66584	5.84788	5.29924	5.7306	5.57071	5.42579	6.03416	5.55149	5.38433	5.32283	5.12475	5.07791	5.23201	5.1883	5.08184	5.07684	5.41577	5.41522	5.23448	5.33143	6.25	5.64507	6.12836	6.55917	6.70701	6.91436	6.38944	6.16551	5.47981	5.32636	5.30741	5.44636	5.40059	5.08052	5.24913	5.02331	5.05362	5.10229	5.27974	5.08258	5.48331	5.51737	5.41648	5.38848	5.23171	5.18972	6.17169
A230046K03Rik	9.89611	10.1173	9.78828	10.0078	9.18227	9.83085	9.95232	9.69887	9.86214	9.69684	9.51563	10.1518	9.91981	9.9465	10.0769	10.0212	10.0493	10.2054	9.55448	9.88795	9.98059	9.67214	9.481	9.49477	10.0444	10.0244	9.47043	9.93631	9.90335	9.75225	10.1377	10.1314	9.77305	10.1994	9.95708	9.9806	10.0376	10.1784	10.1355	10.1258	10.254	10.0875	9.34495	9.38388	9.37972	9.86853	9.01407	9.75322	9.93248
A230050P20Rik	5.87914	6.17764	5.87182	5.76701	5.94332	5.71294	5.79195	5.6055	5.66415	5.85893	5.9312	5.81287	6.6221	6.24148	6.42698	6.00598	6.50795	6.54889	5.83606	5.80669	5.79084	5.88234	5.63096	5.77974	5.94261	6.25924	6.90461	5.95102	5.88454	5.89516	5.75122	5.68371	5.70231	5.85264	6.1279	5.73094	6.24324	6.18393	6.44905	6.10605	6.23167	6.22818	5.64898	5.49257	5.68224	5.7489	5.74726	5.6238	6.13846
A230052G05Rik	5.72462	5.73238	5.84117	5.7409	5.8726	5.8273	5.70505	5.63325	5.60221	5.60812	5.47266	5.65128	5.87438	5.74762	5.846	5.76274	5.77937	5.71242	5.74945	5.78613	5.94035	5.90738	5.70374	5.68068	5.73471	6.00599	6.05204	5.70262	5.87489	5.65146	5.48201	5.58099	5.63762	5.76442	5.58484	5.64625	5.6863	5.61885	5.71979	5.66708	5.64027	5.73244	5.62275	5.527	5.69475	5.61369	5.83209	5.74263	5.90766
A2ld1	6.0219	6.38886	5.99824	5.99803	5.97542	6.22573	5.68465	5.92734	5.85598	5.9638	5.96457	5.95857	6.22192	6.275	6.30008	6.19231	6.23449	6.11538	5.76407	6.27825	5.96477	5.86183	6.05685	6.28788	6.25723	5.97902	6.21335	6.08598	6.14875	6.06069	5.94998	5.98381	6.08088	5.80168	5.95383	5.83293	6.49028	6.35042	6.34438	6.58649	6.47237	6.3714	5.92714	6.0317	5.93009	6.01539	6.08049	5.9219	6.16294
A330021E22Rik	5.52977	5.44611	5.49792	5.4642	5.23974	5.57636	5.64583	5.65454	5.96603	5.76766	5.66983	5.79333	5.52968	5.49539	5.54097	5.44511	5.55589	5.58334	5.6355	5.66378	5.64057	5.49829	5.71708	5.83171	5.62581	5.57061	5.37571	5.70084	5.57073	5.58258	5.91105	5.70118	5.56823	5.66905	5.84732	5.58874	5.64705	5.63089	5.43702	5.5955	5.75062	5.6282	5.7733	5.65351	6.02976	5.72209	5.56321	5.87997	5.38668
A330023F24Rik	5.92518	6.37386	6.81684	5.93109	5.82077	6.15371	5.69756	5.53271	5.65331	5.90786	5.77884	5.71866	5.6879	6.53623	6.01266	5.87361	6.07002	6.27016	7.4559	5.95625	7.00686	6.44731	5.90788	6.17673	6.26899	5.90694	6.3675	5.95653	5.99463	5.8639	5.64763	5.79495	5.78364	5.9531	5.54275	5.64815	6.60628	5.85261	5.67552	5.60106	5.97621	6.24238	5.71689	5.87821	5.76256	7.47143	5.69805	5.89694	5.821
A330050B17Rik	6.12634	6.09836	6.02811	6.02497	6.09189	6.1111	6.2989	6.18868	5.97634	6.20404	6.23466	6.1666	6.25291	6.27927	6.06835	6.28262	6.07223	6.1844	6.53656	6.44299	6.83159	6.17758	6.03687	6.11519	6.14312	6.07486	6.1999	6.10397	6.2032	6.19672	6.17358	6.37166	6.40195	6.07966	6.22778	6.04935	5.91921	6.09651	6.02932	6.17419	6.35823	6.11696	6.22864	5.85243	6.00812	6.32637	6.50901	6.55496	6.21128
A430005L14Rik	5.72325	5.64415	5.84225	6.12191	5.531	6.37708	5.71938	5.79451	6.15103	5.92241	5.478	5.74451	7.36235	7.7657	6.9002	6.63185	7.05924	6.4361	5.79181	5.80352	5.73404	5.73247	5.81819	5.70375	5.93189	5.44113	6.37732	5.60142	5.68214	5.63109	5.70091	6.2089	6.03667	5.8739	5.64855	5.61353	7.20993	6.74676	5.93575	6.72151	6.97351	6.88293	5.68597	5.54817	5.45953	5.86604	5.83948	5.61586	5.60451
A430005L14Rik	7.58236	7.63796	7.77712	7.67858	8.40719	8.22261	7.59593	7.57838	7.43771	7.7403	7.34278	7.50132	8.7057	8.71403	8.86438	8.64777	8.99059	8.99859	7.13773	7.27807	7.4565	7.16361	7.46686	7.60095	8.15786	7.56005	7.7053	7.45436	7.16912	7.10324	7.58085	7.82732	8.07227	7.15617	7.6252	7.20937	8.75693	8.57657	7.62241	8.6249	8.67837	8.50743	7.52573	7.34457	7.05854	7.61951	7.13655	7.28963	7.39463
A430033K04Rik	5.81312	6.07301	5.725	6.16652	5.87112	5.26838	6.43287	6.70197	7.1043	6.51424	6.09635	6.04344	5.55176	5.56499	5.33246	5.69685	5.62963	5.32323	6.35335	6.2988	6.61866	5.89389	6.36987	6.10988	6.1263	5.79742	5.75253	5.67769	5.63839	5.90216	7.04253	7.19863	6.41571	6.4195	6.72547	6.74938	5.53692	5.58912	5.4848	5.40056	5.41186	5.50372	6.21336	6.16759	6.09411	6.9027	7.58014	6.73849	5.98115
A430107O13Rik	7.51686	7.58642	7.29634	7.39177	6.70957	7.36977	8.95709	9.16633	9.44041	8.74463	9.03614	9.18794	6.53494	6.41212	5.88128	6.37844	6.02065	6.37985	5.73364	6.00047	5.66557	6.2229	5.74568	5.9301	6.82147	6.98212	6.34872	9.54877	9.57451	9.38313	7.91132	7.94777	7.47157	10.1651	9.95265	10.1963	5.94657	5.62584	6.17792	6.1497	6.40958	6.26812	5.70292	5.40619	5.6612	5.70849	5.54	5.89612	6.41597
A530013C23Rik	6.06498	6.23699	5.99302	6.26965	6.0848	6.06424	6.12704	5.97563	6.03176	6.06442	5.96861	6.1133	6.6315	6.08447	6.15907	6.19461	6.21611	6.19947	6.08542	6.16317	6.03762	6.25507	6.03617	6.11534	6.09707	6.0677	6.32271	6.39079	6.20766	6.28472	6.10243	5.96387	6.0258	6.16627	6.16195	6.01453	6.28275	6.23126	6.1621	6.25073	6.20403	6.22173	6.06827	6.03285	6.07968	6.18342	6.19382	6.17948	6.27436
A530017D24Rik	5.88263	6.02535	6.29459	6.13878	6.17085	5.97485	5.59121	5.81805	5.9744	5.80884	5.43434	6.124	5.9212	5.97524	6.30433	5.91417	6.40359	6.32201	5.5838	5.63572	5.68921	5.66793	5.50576	6.10093	6.20583	6.0495	6.03986	5.68331	5.90171	6.22433	5.76101	6.07584	6.07704	5.86033	6.12073	6.03461	5.70029	6.00404	5.89861	6.44979	6.41628	6.23013	6.14494	6.06087	6.13959	5.82865	5.76953	5.79003	6.42982
A530054K11Rik	8.06101	8.14195	8.13377	8.28362	7.99902	7.73897	8.03123	7.57312	8.38961	8.11317	7.76967	8.51387	8.42576	8.58997	8.43825	8.71607	8.60237	8.46807	8.4672	7.79016	8.35906	7.46954	7.87899	7.49422	8.01878	7.94039	7.8544	7.64274	7.96741	8.08701	8.4952	7.805	7.59666	8.46955	7.81783	8.33208	8.46749	8.19912	8.32141	8.55781	8.60626	8.35382	8.16841	8.07616	7.98947	8.18374	8.55246	8.32298	7.79809
A530098C11Rik	6.11717	6.05713	6.38661	6.02941	5.43692	5.71531	5.40631	5.25646	5.62249	5.47223	5.57698	5.37641	5.38198	5.6468	5.57803	5.36136	5.67194	5.67792	5.44932	5.41484	5.50484	5.56942	5.77346	5.64772	6.30065	5.63415	5.68475	5.85061	5.63545	5.66614	5.61909	5.35493	5.36753	5.82615	5.64021	5.8032	5.79946	5.41444	5.46106	5.54808	5.59707	5.48723	6.72943	6.26786	6.27532	5.52674	5.34221	5.56285	5.61693
A630007B06Rik	10.0992	9.94168	10.0033	10.1934	9.75706	9.97437	9.89468	9.84321	10.0985	9.93703	9.89107	9.78085	9.76347	9.73152	9.7233	9.75634	9.96157	9.91637	9.41299	9.62543	9.7646	9.71635	9.58182	9.2815	10.1834	10.204	10.3394	10.1865	10.0552	10.3153	9.88041	9.79319	9.93268	10.0393	10.248	10.2157	9.76257	9.78069	9.66926	10.0135	10.234	10.0761	9.79736	9.86043	9.67957	9.33496	9.62296	9.8982	10.2356
A630010A05Rik	6.11734	6.20525	6.1864	5.9444	5.96515	6.37581	5.92547	6.02107	5.98962	6.02901	6.23947	6.00033	6.0317	6.14723	6.00712	6.06324	5.98701	6.01987	6.06145	5.99849	5.83411	6.06369	6.00858	5.91468	5.90992	6.24808	6.09685	6.29855	5.98087	5.97384	6.08947	6.01049	5.92982	6.25756	5.91324	6.10896	5.97214	5.71219	5.94592	5.83352	6.18113	5.96002	5.92727	6.0542	6.09333	5.89692	6.06893	6.05058	6.06313
A630033E08Rik	6.28356	6.30804	6.09162	6.3516	6.30238	6.36535	7.19338	6.84065	7.26091	7.10728	7.04541	7.0106	6.65283	6.79482	6.66598	6.61031	6.83675	7.01966	6.97926	6.86224	6.7893	6.77724	6.71593	7.12442	6.61166	6.42396	6.65028	6.53976	6.36051	6.21964	7.24697	6.9156	7.24204	7.04034	6.99171	7.25348	6.88109	6.78325	6.95176	6.67477	6.79956	6.91315	6.88939	6.81988	6.6168	6.82075	6.36449	6.92531	6.74618
A630072M18Rik	6.26514	6.23392	6.45913	6.58358	6.58147	6.07925	5.82547	5.48817	5.7168	5.97299	5.79687	5.58441	5.62478	5.4076	5.62028	5.84977	5.80113	5.92127	6.55355	6.00357	5.76288	5.65618	5.82517	5.76844	5.91955	6.49682	6.26242	6.03637	5.83649	5.82331	5.71639	5.89841	5.66316	5.53788	5.71752	5.71976	5.51907	5.59618	5.74271	5.72893	5.49725	5.81102	5.74991	5.80178	5.83036	5.78371	6.10431	5.95411	6.89943
A630089N07Rik	9.31884	9.24513	9.80103	9.42914	10.5	10.501	9.89452	9.31904	9.87679	9.94251	9.16269	9.43657	10.358	10.0349	10.0706	10.6095	10.7116	10.5233	10.052	9.81573	8.49593	9.91299	9.8699	9.62467	9.50096	9.13567	10.393	9.22737	9.61248	9.54187	10.0802	9.86004	9.67731	10.505	9.76369	9.93642	10.0566	9.77042	10.2357	10.1807	10.2673	10.5054	9.95494	9.41899	9.24631	10.1296	10.2298	10.1615	9.92568
A730017C20Rik	4.91783	5.08181	4.69251	4.77694	5.13016	4.86435	5.70462	5.10109	5.88675	5.58169	5.21957	5.48925	4.78721	4.84197	4.84611	4.75818	4.78783	4.7997	4.98081	5.65595	5.12375	4.82946	5.34052	4.94066	4.64825	4.89597	4.86999	4.71881	4.9045	4.73948	6.41215	5.99794	7.94116	4.96684	5.35948	4.87273	4.65164	4.72687	4.67226	4.69445	4.87007	4.75458	5.66814	5.43235	5.19994	5.5692	5.70855	6.25956	4.82507
A730017L22Rik	6.23113	6.19716	6.28156	6.25183	6.41982	6.44298	6.26895	6.4202	6.07713	6.22578	6.29455	6.22102	6.31083	6.21993	6.26119	6.29914	6.24788	6.26344	6.37387	6.36753	6.53476	6.392	6.44677	6.09381	6.37213	6.33846	6.27315	6.54226	6.23424	6.62211	6.35861	6.35715	6.20746	6.26686	6.07016	6.43539	6.19421	6.48989	6.26819	6.33901	6.24619	6.03653	6.46791	6.21776	6.33373	6.30404	6.29579	6.36139	6.28747
A830007P12Rik	7.56861	7.32304	7.43081	7.57979	7.30963	7.3913	7.02339	7.00189	6.91439	7.19025	6.97966	6.93835	6.69642	6.6642	6.72645	6.75463	6.74086	6.66348	7.40738	7.64747	7.63003	7.095	7.46651	7.5998	7.49424	7.57317	7.93591	7.55007	7.30114	7.39639	7.1847	7.25396	7.0421	7.23388	6.95781	6.8002	6.51023	6.55357	6.34289	6.51586	6.50969	6.58253	7.96223	7.84702	7.69693	8.18883	7.61649	7.57818	7.74407
A830039N20Rik	5.17225	5.16779	5.28816	5.20464	5.67192	5.52177	5.53515	5.44199	5.38572	5.86126	5.55503	5.19961	5.17935	5.08798	5.29323	5.18686	5.24994	5.1737	5.1955	5.36435	5.16292	5.62089	5.63794	5.28027	5.34631	5.05539	5.31653	5.78786	5.67837	5.25212	5.51351	5.91704	5.80596	5.94253	6.03801	6.07698	5.22678	5.12588	5.17895	5.17922	5.19354	5.06788	6.03129	6.49892	6.13554	5.53489	5.57673	5.67292	5.60485
A830080D01Rik	8.379	8.16374	7.92343	8.13741	8.27032	8.14139	8.83912	8.45762	8.73162	8.7585	8.64894	8.75936	10.9513	10.9528	10.7496	10.4123	10.4215	10.4138	8.25131	8.71439	8.76655	8.10865	8.37184	8.56822	8.72674	8.4595	8.23475	8.3929	8.39685	8.46668	8.6453	8.55904	8.40061	8.52221	8.36402	8.62489	11.0797	11.1438	11.2124	10.5131	10.5675	10.6512	8.17207	7.8401	8.05226	8.64229	8.37254	8.89173	8.39802
A830093I24Rik	5.47614	5.27431	5.35773	5.55101	5.39084	5.30225	5.25291	5.24552	5.27576	5.23592	5.61992	5.32205	5.87496	6.19785	5.67456	5.96134	5.63744	5.66728	5.54045	5.76748	5.60607	5.55436	5.41661	5.58173	5.6227	5.24501	5.39226	5.54034	5.34148	5.28008	5.31013	5.5768	5.50656	5.44447	5.28384	5.49184	6.71105	6.16857	5.39612	6.30915	6.16272	5.63244	5.65528	5.37166	5.46085	5.24115	5.60133	5.61213	5.19949
A930001N09Rik	7.53392	7.12006	7.06938	7.27296	7.10286	6.33536	7.63102	7.02288	7.4482	7.54214	7.829	8.02059	6.89076	6.77551	7.31777	6.94753	6.92965	6.77842	8.07017	8.08404	7.65895	7.64836	8.55217	8.60361	7.48796	7.20556	6.74109	6.89955	7.38017	6.977	7.78336	7.64654	8.06902	7.56366	7.54601	7.3362	7.41146	7.36749	7.36567	7.48124	7.95086	7.20796	8.80867	8.9776	8.97843	8.26402	8.11422	8.77715	6.4653
A930038C07Rik	5.25319	5.22365	5.23231	5.40305	5.68842	5.23263	5.16687	5.08056	5.6173	5.29437	5.3214	5.53322	5.03977	4.95592	5.03699	5.05478	4.98785	4.92334	4.98561	5.095	4.97553	5.15873	5.05087	4.97319	5.64929	5.79528	5.11216	5.99662	6.58426	6.32301	5.20671	5.21723	5.27967	5.47855	5.62065	5.937	5.07223	5.00747	4.97585	4.95614	5.0568	4.90227	5.16776	5.06288	5.09334	4.98438	5.11278	5.03993	5.57866
A930039A15Rik	5.76636	5.89295	6.15246	5.49485	5.56135	5.34547	5.83883	7.38312	5.6835	6.55882	6.09392	6.82608	5.49833	5.50494	5.52705	5.59344	5.498	5.56417	5.64695	6.28958	6.15288	5.89885	6.45552	7.45696	5.59921	5.38805	5.31945	5.47788	5.90117	5.58578	5.86623	6.34209	5.35526	5.972	5.74521	5.93933	6.01739	5.6061	5.24983	5.3186	5.50836	5.36014	5.39217	5.15354	5.60895	5.78934	5.39548	5.6641	5.39514
AA408296	7.99681	7.8907	8.37521	7.81482	7.34988	7.95893	7.94375	8.03432	8.23619	7.94584	7.91578	7.90521	8.59125	8.56234	8.84588	8.63294	8.97333	9.15572	7.25444	7.41406	7.6698	7.22057	7.80205	7.6388	7.67428	7.80885	7.91922	7.81898	8.06651	8.06082	7.94892	7.94204	8.07609	8.00129	8.06659	7.95556	8.70099	8.65597	8.68349	8.52134	8.72219	8.74937	7.83077	7.64363	7.60934	7.4733	7.21327	7.77194	7.65098
AA414768	5.94149	5.88202	5.88701	5.70908	6.116	5.66776	6.21876	6.40362	6.17404	6.26055	6.0948	6.01292	6.06453	6.06763	5.66398	5.98201	5.87829	5.96812	6.80845	6.75648	6.33148	6.38899	6.45834	6.77758	5.99049	5.90196	6.06987	6.09432	5.88513	6.02628	6.7678	6.54481	6.4703	6.20426	6.04965	6.30147	5.88719	5.91397	6.0228	5.87612	5.95494	6.09072	6.27709	6.61044	6.20075	7.02693	6.91888	6.66888	6.17951
AA987161	7.02258	7.26143	6.83127	7.21388	7.05544	6.81427	6.9579	6.81681	7.36286	7.14251	6.94687	7.01042	7.68626	8.00811	8.27324	8.21912	8.34223	8.53677	6.69344	6.73685	6.72087	6.77777	6.81066	7.11872	7.45401	7.05295	6.45029	6.81385	6.9529	6.72692	6.93232	7.01656	6.71496	6.83082	7.04268	7.01353	8.45667	7.96079	8.2911	8.48618	8.4126	8.33694	6.83544	6.92167	6.74856	7.31613	7.06294	7.2651	7.28493
Aaas	7.89132	7.9164	8.14943	7.87749	7.45969	8.38511	7.94112	7.95962	8.07483	7.87008	8.16383	7.6982	8.94052	8.93436	8.95366	8.72615	8.98176	8.90251	7.83936	7.36545	7.38347	7.57575	7.51891	7.38883	7.67297	7.9083	7.69943	7.57131	8.02449	7.92653	7.87572	7.85743	7.69829	7.72772	8.05199	7.94852	8.81445	9.13314	8.86295	9.03536	9.14361	8.98927	7.45631	7.61083	7.68479	7.22271	6.95005	7.20633	7.75218
Aagab	5.58029	5.76793	6.08518	5.53329	5.69096	6.1129	5.76076	6.02294	5.59384	5.93214	6.12574	5.58523	6.16795	6.32633	6.38562	5.9008	6.08522	6.58537	6.27836	6.40533	6.17375	7.32065	7.72167	7.70899	5.4917	5.77284	5.3612	5.56218	5.99148	5.68277	5.91023	5.83672	6.07128	5.94091	6.05856	6.32088	6.00962	6.09349	6.32568	6.11732	6.25041	6.70493	7.61093	7.78429	8.04058	6.54605	6.27217	6.11236	5.78326
Aak1	7.49366	7.21186	7.07257	7.2869	6.77208	7.0169	7.29697	7.50424	7.33085	7.27452	7.23469	7.25701	7.08013	6.82809	6.93714	7.07113	6.73664	7.00439	7.21142	7.17052	7.35393	6.96863	7.26312	7.16249	7.23172	7.2795	6.83564	7.1776	7.29116	7.26766	7.16651	7.15342	7.18242	7.34564	7.46001	7.29723	6.8412	6.95272	6.87776	7.03965	6.93505	7.0592	7.65145	7.54825	7.11504	7.05852	7.23223	7.27094	7.07468
Aak1	7.94414	7.78878	7.5046	7.59708	6.1816	7.67814	7.90397	7.74685	8.21108	7.84609	8.61292	8.67327	7.53368	7.29281	7.38582	7.00987	7.05235	7.10723	7.71998	7.30891	8.38032	7.3329	7.92383	7.75892	7.60159	7.52001	7.41424	7.49425	7.85474	7.90362	8.21956	8.17494	7.73515	8.26394	8.00406	8.35315	7.71116	7.12987	7.06047	7.62038	7.27842	7.48861	8.00594	8.085	7.74913	7.73788	7.95407	7.7479	7.31748
Aamp	8.57366	8.63455	8.71382	8.51382	8.41276	8.62276	8.92516	8.92431	8.64092	8.54817	9.22213	9.1612	9.90366	9.67931	10.1098	9.84107	9.7393	10.0438	9.07169	9.00616	8.82715	8.81377	9.05561	8.98547	8.93539	8.26325	8.70457	8.51003	8.68807	8.57625	8.81595	8.83991	9.28455	8.87621	8.93914	9.21768	9.31221	9.09345	9.22212	9.69027	9.70097	9.85054	8.77182	9.0336	9.01757	9.42967	9.6707	9.09577	8.68585
Aard	6.77212	7.17998	7.11619	6.44929	7.47449	7.1878	8.00533	7.68266	7.36851	9.63412	9.30579	8.23027	8.38801	8.52339	8.57742	8.29603	8.25563	8.29887	8.75295	8.33519	8.31063	10.5304	10.6464	10.4216	6.76664	6.7288	7.19188	8.25064	8.01069	7.03244	8.05763	7.99385	8.06821	10.6255	10.5711	10.4593	8.40654	8.44352	8.28118	8.3307	8.19268	7.79423	10.7379	10.7897	10.8179	8.43355	8.91914	8.60978	6.59257
Aars	7.7408	7.70554	7.88757	7.70147	7.67145	7.76395	7.74539	7.74142	7.99532	7.76546	8.21148	8.14379	8.38684	8.20922	8.39623	8.3833	8.29241	8.27936	7.53311	7.34238	7.30024	7.41713	7.76595	7.76999	7.41352	7.46893	7.41218	7.77408	7.76105	7.85543	7.58229	7.6462	7.65067	7.91695	7.82927	7.80967	7.91997	8.04714	7.93073	8.17562	8.03469	8.28444	7.6846	8.12349	7.91045	7.39396	7.81586	7.45575	7.71747
Aarsd1	7.74862	8.07097	8.19293	7.88776	7.82998	7.85998	7.91079	8.04569	8.1198	8.08928	8.62445	8.17453	8.30436	8.50309	8.47074	8.51572	8.38489	8.52384	7.42005	7.3532	7.43218	7.88978	7.54889	7.48018	7.76158	7.69162	8.0009	7.47369	8.00613	8.13215	7.83537	7.92898	7.94701	7.77594	8.08103	7.92756	8.37745	8.51067	8.25043	8.29825	8.2042	8.05528	7.78915	8.14511	7.78932	7.40849	7.16836	7.59837	7.75625
Aasdh	6.4502	6.46036	6.55063	6.58921	6.28367	6.17965	6.41231	6.4725	6.63499	6.64511	6.49442	6.54262	7.63916	7.6353	7.64289	7.68754	7.69614	7.74484	6.35703	6.60935	6.72621	6.79086	6.4468	6.68465	6.47845	6.60918	6.2052	6.31685	6.19091	6.46576	6.77308	6.61978	6.7929	6.8216	6.68397	6.52603	7.53283	7.68338	7.63685	7.67691	7.77395	7.68609	6.80968	6.32087	6.60846	6.62661	6.63134	6.61383	6.60589
Aasdhppt	8.58907	8.71119	8.34201	8.63758	8.9256	8.6746	8.96882	8.99278	9.28458	9.03458	9.0396	8.86776	9.4911	9.76176	9.62809	9.58464	9.77548	9.69646	9.55619	9.99897	9.65933	9.40245	9.55047	9.66459	8.49615	8.64806	8.29434	8.66087	8.74957	8.27258	8.91367	9.16097	8.86178	9.04198	9.1647	9.24391	9.51216	9.15889	9.53663	9.70314	9.7345	9.65224	9.04566	9.07093	9.1875	9.04958	9.13325	9.18532	8.29413
Aass	4.76139	4.77684	4.86662	4.892	4.81066	4.83255	4.78699	4.81221	4.87398	4.79507	4.76554	4.82554	4.7861	4.73388	4.63574	4.73879	4.73221	4.69225	5.27186	5.03368	5.33784	5.26453	5.42398	5.59956	4.78258	4.93187	4.9872	4.83429	4.91848	4.83269	4.97047	4.96031	4.79682	4.87608	4.8588	4.98359	4.77036	4.62064	4.66472	4.69693	4.74151	4.68544	5.17616	5.41576	5.39287	5.13437	5.3053	5.16183	4.9325
Aatf	9.8003	10.1434	10.2147	9.65995	9.58651	9.57633	9.96666	10.1312	10.2968	10.2286	10.2811	10.3741	11.4314	11.2157	11.4665	11.3391	11.3115	11.3549	9.70838	9.6773	9.88102	10.565	10.3334	10.0502	9.69566	9.58723	9.81756	9.76529	10.2368	10.0721	10.0661	10.2124	10.2273	10.1559	10.1379	10.1523	11.351	11.4444	11.3477	11.5478	11.5382	11.5833	9.70732	9.82775	9.93469	9.87993	10.5401	10.1391	9.68991
AB124611	6.33618	6.24838	6.13338	6.66553	9.24652	6.14119	6.16095	6.23269	6.03187	6.01106	5.67712	6.17573	5.84089	5.932	6.05563	5.96187	6.05336	6.02109	6.16126	5.83521	6.18011	5.9059	6.00687	5.95466	5.92831	6.02619	6.2969	6.36615	6.40639	6.09395	5.95221	6.52828	6.0221	6.04213	6.53393	6.15308	5.86207	5.96191	6.06893	6.01385	5.96846	5.88831	6.15553	6.07092	6.05761	6.39401	6.20843	6.3422	6.92242
Abat	6.29907	6.57761	6.32689	6.3458	6.70016	6.66073	8.64197	8.58174	8.11595	8.64322	8.22673	8.60573	6.23584	6.49141	6.59853	6.26978	6.60513	6.4695	8.9528	8.6136	9.10853	9.13153	9.80584	9.60466	7.11373	6.50509	6.45277	7.21369	7.14438	6.93069	8.94911	8.83797	8.79232	8.52008	8.78189	8.67966	6.42666	6.42074	6.0906	6.35822	6.55684	6.52261	9.59726	10.0615	9.65178	8.84909	8.29983	8.96659	7.11028
Abca1	9.06998	8.76452	8.96102	8.99399	8.06224	8.21749	7.37703	7.25868	7.42632	6.99803	7.12269	7.31321	6.20207	6.02698	6.07033	5.94948	5.83975	5.91989	7.13264	7.22807	7.4746	7.28417	6.85261	7.01877	9.14173	9.51519	8.35845	9.28711	9.40255	9.28115	7.67055	7.504	7.34296	8.06144	8.09064	7.87948	6.40396	7.19141	7.06741	6.22432	6.55074	6.62229	8.34468	8.59736	8.16239	7.71464	7.84874	7.99699	8.79971
Abca2	5.48847	5.44159	5.52407	5.63613	5.51611	5.51665	5.52693	5.53736	5.5347	5.58246	5.48292	5.502	5.66195	5.72404	5.52906	5.64581	5.61316	5.61579	5.60759	5.61538	5.61147	5.72445	5.81373	5.89192	5.4886	5.68946	5.59885	5.61213	5.53239	5.63388	5.53836	5.46985	5.53781	5.56639	5.52663	5.48729	5.94521	6.22571	5.83397	5.67325	5.73895	5.64027	6.27314	6.57509	5.99408	5.65808	5.87104	5.71179	5.59776
Abca5	5.79748	5.73705	5.80196	5.96623	5.73558	5.78957	6.53919	7.3245	7.07757	6.50984	6.14903	6.94074	5.84703	5.66691	5.78882	5.62391	5.87423	6.13139	6.45094	6.87567	6.88157	6.08403	6.22258	6.06334	6.00373	5.88612	5.55572	6.07113	6.17554	6.0437	6.98221	6.97547	6.43682	6.25755	6.54538	6.81215	5.99625	6.08551	6.29207	5.63605	5.81347	5.80512	5.88586	6.01219	6.24157	6.2804	6.24042	6.57072	5.97562
Abca9	6.07715	5.87034	5.57558	6.16809	5.19515	5.99309	5.23503	5.4394	5.15718	5.1199	5.15801	5.24012	4.99437	5.03501	5.05094	5.02962	5.10417	4.94643	5.45529	5.68842	5.6593	5.16863	5.1743	5.41861	5.81773	5.59998	5.24281	5.9715	5.6346	5.27939	5.45542	5.40598	5.18323	5.22357	5.08464	5.1373	5.04004	5.06779	5.07645	5.08349	5.07894	5.01243	5.03115	5.02434	5.10736	5.17322	5.18581	5.20212	5.47737
Abcb10	5.55674	5.56368	5.47994	5.56291	5.47365	5.62947	5.61606	5.43252	5.33758	5.61007	5.62499	5.5304	5.82307	5.97404	5.71503	5.7672	6.01191	5.8509	5.56288	5.34858	5.62968	5.74966	5.65878	5.51019	5.56181	5.62216	5.57201	5.44732	5.54596	5.60874	5.60079	5.43961	5.91646	5.85382	5.82564	5.63919	6.16951	6.40376	6.1547	5.65139	5.73775	5.91359	6.17102	5.67975	6.0348	5.87173	5.7492	5.63927	5.63318
Abcb1a	5.62626	5.30471	5.47589	5.56874	5.21145	5.68757	5.13135	5.13558	5.16006	5.32075	5.31832	5.30058	5.19206	5.14364	5.21621	5.22375	5.15194	5.46045	5.63026	5.27557	5.27442	6.90457	7.14803	7.69954	6.16989	6.23298	5.96085	6.13229	5.82954	6.18601	5.12354	4.93244	5.20989	5.31655	5.17137	5.00435	5.14984	5.14763	5.35138	5.38942	5.23415	5.22213	5.18973	5.16708	5.11446	5.15007	5.13801	5.14829	7.19953
Abcb1b	5.27499	5.43742	5.33158	5.15471	5.31697	5.86874	5.13797	5.01525	5.20644	5.17404	5.22391	5.48612	5.15755	5.26269	5.5132	5.42434	5.46509	5.41881	5.53916	5.03968	5.21875	5.56766	6.57011	6.62444	5.24229	5.18185	5.45637	6.27092	6.35075	6.16121	5.06841	4.94404	5.09686	5.26535	5.36607	5.0998	5.44044	5.48286	5.24091	5.16606	5.28549	5.28602	5.31035	5.25024	5.20885	5.02705	5.11668	5.13218	5.48063
Abcb6	5.48931	5.57569	5.68649	5.75165	5.60708	5.44567	5.43804	5.69128	5.57789	5.58084	5.60675	5.83605	5.8819	6.38114	6.26886	5.72744	5.75009	5.87323	5.46106	5.38322	5.48193	5.46639	5.37119	5.35176	5.76143	5.57736	5.5998	5.62011	5.59961	5.34949	5.6393	5.61242	5.48924	5.58127	5.73886	5.43668	6.36313	6.62384	6.91351	6.41514	6.42856	6.36965	5.72598	5.61533	5.43851	5.58162	5.7109	5.5987	5.61399
Abcb7	8.87279	8.61021	8.75895	8.90922	8.91403	8.66375	8.20964	8.02809	8.57161	8.15068	8.56089	8.04494	9.16447	9.16364	9.02216	8.70652	9.10917	8.97229	8.52209	7.97273	8.50522	8.7377	8.29735	8.14542	8.61237	8.51184	8.62409	8.51803	8.41887	8.39547	7.87916	8.04492	7.80973	8.05863	8.05109	8.12718	9.22366	9.34605	9.282	8.73055	8.87621	8.81907	7.12511	7.51758	6.92712	7.22779	7.82828	7.67603	8.49269
Abcb8	5.79066	5.83899	5.64612	5.79602	5.70137	5.87099	5.71023	5.77492	5.80949	5.5964	5.91389	5.65556	6.1357	6.27225	5.90172	5.93307	5.88163	6.05139	5.67922	5.86178	5.66749	5.7722	5.80079	5.74023	5.79419	5.79598	5.74827	5.78791	5.76853	5.69292	5.83107	5.74599	5.6827	5.68077	5.59131	5.72002	5.95319	6.26895	5.90205	5.82271	5.9439	5.65142	6.17816	6.20772	6.32763	5.68074	5.62704	5.79067	5.74701
Abcc1	5.87892	5.70488	6.00832	5.71167	6.04503	5.99185	6.42905	6.3621	6.07608	6.04384	6.0644	6.4146	6.13975	6.05495	6.40864	6.03384	6.01753	5.92134	7.39287	7.00557	7.5974	6.59308	6.85822	6.67349	5.73255	5.74465	5.81983	5.85869	5.72675	6.03769	6.26142	6.43214	6.50762	6.3063	6.18636	6.15294	5.99861	6.14073	6.07209	6.3676	6.47023	6.29123	6.63261	6.55505	7.18811	6.82445	6.51888	6.83218	6.21536
Abcc4	5.78228	5.60351	5.65503	5.78593	5.69853	5.53168	5.26624	5.18637	5.32867	5.24964	5.37518	5.18673	6.37517	7.4292	6.77965	6.78254	6.89968	6.98167	5.34677	5.2368	5.19205	5.45369	5.33378	5.19172	5.6073	5.43625	5.69432	5.67236	5.55757	5.66435	5.16442	5.20257	5.23474	5.29937	5.12845	5.19587	6.828	7.28564	6.52413	7.3226	7.37745	7.27796	5.28113	5.3198	5.4285	5.24638	5.28347	5.34728	5.41487
Abcc5	6.7535	6.77844	7.00391	6.71757	7.08303	6.81767	7.23918	7.40657	6.99307	6.91937	6.5281	7.43536	7.17134	7.16263	7.30924	7.40474	7.35085	7.3112	7.19685	7.28816	7.31147	7.57653	7.37337	7.38449	6.82024	6.86637	7.36347	6.73576	6.82751	6.77476	7.49864	7.40717	7.5186	7.09376	7.28878	7.21961	7.43786	7.6347	7.39662	7.28296	7.24621	7.30073	7.08755	6.9473	7.02066	7.55089	7.51529	7.46797	6.87136
Abcc9	5.60943	5.81519	5.49602	5.71692	5.61822	5.35068	5.27118	5.12613	5.15235	5.07205	5.29377	5.25007	5.17735	5.28028	5.29173	5.24739	5.15295	5.18614	5.24637	5.20934	5.10145	5.13827	5.2902	5.0697	5.20953	5.50317	5.1875	5.31516	5.51406	5.52992	5.2909	5.2951	5.11381	5.53816	5.4359	5.36792	5.20782	5.20906	5.18596	5.36163	5.32318	5.3215	5.09462	5.1459	5.17399	5.14625	5.16901	5.1573	5.3207
Abcd1	6.47465	6.33998	6.4424	6.33835	5.76997	6.56424	6.28502	6.05283	5.98556	6.24417	5.94175	5.86261	7.03731	7.47322	6.85848	5.85314	6.52971	6.77496	5.76828	6.32994	6.17535	5.83899	5.89256	5.86433	6.66579	6.7391	6.56439	6.36632	6.47832	6.11345	5.96813	6.14821	6.51455	5.81532	6.08215	6.109	7.1346	7.04238	7.1316	6.02554	6.23621	5.85792	5.98774	5.72742	6.08268	6.0555	5.89953	6.29836	6.27715
Abcd2	6.89208	6.39411	6.87686	6.72804	6.14897	5.74349	5.6576	5.56065	5.64282	5.61313	5.33435	5.6136	5.06352	4.95909	5.05171	4.97347	5.06091	4.97398	5.09004	5.09568	5.30089	5.08532	5.26552	5.16624	5.45634	5.89756	5.69636	5.44091	5.50213	5.53028	5.33736	5.71431	5.59828	5.18191	5.42493	5.25713	4.99868	5.00933	5.12561	5.00926	5.03555	5.0821	5.12191	4.99041	4.94788	5.11532	5.66056	5.03474	5.10462
Abcd3	8.23182	8.25292	8.17728	8.30374	7.18302	8.31474	8.86016	8.916	8.86374	8.84339	8.96071	8.98173	7.6639	7.93971	8.0286	8.01562	7.84304	8.04623	9.25459	9.13721	9.16284	10.2433	9.91146	9.70044	8.82947	8.96318	8.0507	8.5286	8.37396	8.23371	8.92037	8.95651	9.38817	9.31356	9.09586	9.02274	8.19709	8.20332	8.19257	8.17934	8.26633	8.27361	9.9874	9.78391	9.77394	9.28589	9.39447	9.11142	7.89496
Abcd4	6.09895	6.05196	5.93851	5.95319	6.32299	5.92475	5.90952	5.92235	5.84221	5.7185	5.69594	5.70264	6.0927	6.36773	6.31471	6.4954	6.44427	6.45426	5.95658	5.73163	5.84267	5.73415	5.86391	5.9479	6.14388	6.42723	5.73701	5.77036	5.83287	5.83452	5.78976	5.82532	5.79605	5.71097	5.67817	5.85657	6.19609	6.63135	6.28541	6.14246	6.10756	6.01746	5.54039	5.81865	5.70379	5.82102	5.83001	6.19584	6.15467
Abce1	10.3368	10.1937	10.2545	10.4609	10.6602	10.2545	10.4909	10.3487	10.5351	10.4545	10.4938	10.4372	10.6049	10.5551	10.44	10.6703	10.7856	10.7701	10.001	10.0249	10.0636	9.81747	10.0335	9.84143	10.2798	10.308	9.77102	10.1851	10.381	10.2138	10.4589	10.4059	10.3314	10.2743	10.5486	10.6734	10.8495	10.7002	10.5211	10.6929	10.6991	10.7149	10.0018	10.2399	9.85579	10.249	10.0868	9.9987	10.1364
Abcf1	8.37554	8.35507	8.54932	8.06457	8.0863	8.07686	8.36602	8.49962	8.59708	8.48301	8.65537	8.48799	8.86271	9.01802	9.01019	9.02694	9.03582	8.99697	8.55455	8.49577	8.40508	8.16082	8.63505	8.69625	7.91912	8.04337	7.90759	8.04362	8.48129	8.44654	8.41126	8.36972	8.69752	8.41943	8.34461	8.44951	8.78338	8.84457	8.86017	8.87142	8.92975	8.97338	8.46147	8.62655	8.46473	8.45475	8.69313	8.44464	7.73585
Abcf2	8.59866	8.57293	8.73728	8.52649	8.27363	8.32829	8.3898	8.03715	8.44308	8.33827	8.58367	9.05421	9.73997	9.70545	9.74889	9.61954	9.56125	9.68626	8.10988	8.46426	8.01796	8.09337	8.66318	8.26327	8.42642	8.6546	8.33854	8.27638	8.56076	8.63376	8.33689	8.49305	8.3233	8.30031	8.19933	8.40209	9.53098	9.81249	9.79355	9.55552	9.592	9.8055	8.51335	8.53696	8.58598	7.87408	7.71508	7.90579	8.84128
Abcf3	7.89018	8.20742	8.21799	7.94104	7.4484	7.35745	8.2768	8.68945	8.50256	8.35788	8.37867	8.31917	8.26585	8.38094	8.26231	8.07196	8.34694	8.23551	8.91029	9.00808	9.02158	7.75606	8.44005	8.90317	7.79237	7.04988	7.62436	7.74901	8.03697	8.37552	8.50117	8.60486	9.01229	8.47463	8.51053	8.5172	8.71527	8.83446	8.57664	8.61611	8.63622	8.81012	8.50131	8.5114	8.54665	8.52029	7.98812	8.72426	7.91982
Abcg1	6.20346	6.15938	6.22698	6.52597	6.14948	5.95033	6.08033	5.87721	5.9559	5.85381	5.74374	5.65638	6.407	6.78013	6.66878	6.58971	6.81086	6.62656	5.95382	5.92201	5.88413	5.93356	5.66772	6.05227	6.61356	7.11459	6.83544	6.72353	6.88233	6.73787	5.59308	5.84447	5.80311	6.24153	6.06795	6.04831	6.93072	6.52166	6.49501	7.05751	6.89526	7.14447	6.29453	6.16891	6.28272	6.14201	6.00175	5.91092	6.49369
Abcg2	10.7169	10.8458	10.6691	10.8997	10.6482	10.4093	9.58563	9.50276	9.65445	9.73175	9.78131	9.63369	10.5315	10.4036	10.4533	10.6325	10.5637	10.5731	9.03859	9.1397	9.05584	8.57534	9.35514	8.9418	10.8056	10.8955	10.5908	10.795	10.9659	10.9872	9.02425	9.27775	9.58388	9.18924	9.49499	9.4636	10.2129	10.0511	10.1324	10.3778	10.302	10.3368	8.59578	8.37328	8.46185	8.50296	9.02253	8.9507	10.6094
Abcg3	5.71601	6.13881	5.52746	6.10013	5.17441	6.42877	4.99278	5.01842	4.86709	4.88492	4.86702	4.9688	4.95002	5.00322	4.99801	5.07572	4.91954	4.95357	5.0166	5.09447	5.03787	5.15907	5.00234	4.98811	5.46815	5.22992	5.29545	5.41775	5.07173	5.11464	4.95744	4.90039	5.09422	5.02255	4.90386	4.93072	4.97294	4.9711	5.00858	5.02783	4.9571	5.01616	4.84843	4.84116	4.8745	5.01475	5.01631	4.96467	5.07288
Abcg4	5.82452	5.82414	5.99396	5.86191	6.07733	5.92701	5.98406	6.17593	5.85874	5.90381	5.78315	5.70376	5.99286	5.934	5.95542	5.95081	5.94033	5.91066	6.2292	5.85206	6.03586	6.0024	5.95857	5.96448	5.8834	5.85087	6.10354	5.90492	5.93177	5.97315	5.94304	5.94017	6.22602	5.9698	5.79677	6.01943	6.0919	6.04408	5.97356	5.84446	5.95086	6.04497	6.15519	5.97496	5.86032	5.95177	6.14308	6.0167	5.96976
Abhd1	6.86865	6.79622	6.8422	6.85287	6.25132	6.87663	6.71983	6.90616	6.97084	7.02456	6.87418	7.24278	6.82444	6.41671	6.34913	6.3066	6.6795	6.84931	7.19458	7.05991	7.12446	8.07068	7.12889	7.10127	6.7022	6.71608	7.01514	6.70825	6.88402	6.81163	7.1791	6.98555	6.83268	7.02797	7.13977	6.97026	6.54669	6.47055	6.44885	6.70618	6.52499	6.77138	6.88159	6.73969	6.95231	7.03496	7.0765	6.87714	6.81435
Abhd10	7.71249	7.37163	7.20955	7.29697	7.42068	7.21007	7.24107	7.30407	7.55748	7.22925	7.58799	7.18067	7.34854	8.17334	7.95284	8.48969	8.16776	8.03787	7.10288	6.97645	6.7794	6.12873	6.74136	7.13131	7.53047	7.05732	6.82728	7.28404	6.86306	6.92789	7.26528	7.45621	7.3179	7.33252	7.72282	7.4308	8.16558	8.1475	7.8524	8.22735	8.0921	8.25684	7.3813	7.28518	6.99999	7.03729	7.32233	6.72774	6.84143
Abhd11	5.91073	6.19051	6.01174	6.18391	6.32359	5.97074	6.09183	6.17002	6.23891	6.07441	6.20685	5.85447	6.79965	6.94889	6.5616	6.66045	6.73785	6.71072	6.65394	6.48845	6.3659	6.24612	6.17749	6.4867	6.04554	6.09307	6.2196	6.30752	6.08536	5.66775	5.90296	6.20445	5.94832	6.01515	5.99487	5.80073	6.58354	6.52448	6.29205	6.30566	6.38961	6.02574	6.27537	6.14983	6.5351	6.7948	6.9278	6.38974	6.32422
Abhd12	8.04715	7.67302	7.49217	7.97095	7.71324	7.74216	7.85611	7.87785	7.91657	7.90156	8.11609	7.77893	8.00306	7.66937	8.34955	7.97975	7.51674	7.7543	8.76118	7.97101	7.78007	8.7678	8.72275	8.86008	8.17592	8.66115	7.68698	8.23465	7.89314	7.35723	8.31244	8.03176	8.0467	7.86038	8.07952	8.16358	8.03722	8.09414	8.18107	8.03053	7.93755	7.81824	8.11918	8.57163	9.0064	8.95875	8.53264	8.96615	8.04804
Abhd13	7.94748	8.10308	8.01488	8.15821	7.5224	8.13512	7.91282	7.98336	8.29191	8.15646	8.552	7.8315	8.52594	8.41892	8.70599	8.1997	8.48458	8.45733	8.0321	8.03132	7.81979	8.11798	7.9788	8.06992	7.96656	8.36667	7.65807	8.2129	8.2432	8.11709	8.03164	8.12879	7.90873	8.07924	7.78509	8.01522	8.31519	8.44456	8.52115	8.57218	8.46389	8.58381	8.04281	8.4362	8.34518	7.94082	7.48732	7.90985	8.07158
Abhd14a	5.75219	6.05032	5.86179	5.85867	6.16605	6.06053	6.04024	6.11854	6.21436	6.1634	6.14643	6.02846	6.04954	5.96385	6.00122	6.05454	5.88017	5.99347	6.22496	6.10702	6.0961	6.07904	5.98681	6.11371	5.94325	5.90804	5.99618	5.94622	5.84319	5.91278	6.1467	6.20368	6.14629	6.13032	6.26972	5.9211	6.18095	6.10752	6.11548	6.02087	6.18725	6.02413	6.04546	6.08721	5.87189	6.14215	6.61788	6.07432	5.93796
Abhd14b	5.43646	5.60621	5.52174	5.61478	6.8407	5.33212	5.41184	5.40123	5.37028	5.45933	5.27493	5.32404	5.38685	5.18573	5.23113	5.29348	5.31352	5.01213	5.94338	5.92525	6.32056	5.87599	5.69247	5.71914	5.47454	5.54234	5.3778	5.48562	5.39945	5.3789	5.76014	5.57615	5.84616	5.36785	5.53257	5.17381	5.4334	5.43454	5.28998	5.19517	5.19416	5.53148	5.37809	5.28022	5.4114	5.89909	5.91614	6.11744	5.66668
Abhd2	6.58278	6.79177	6.91636	6.73508	6.55815	7.17447	7.09858	7.42228	7.22752	7.59245	7.60252	7.39548	7.84134	7.90995	7.80264	8.26944	8.01751	7.81165	6.98839	6.91144	7.00783	6.99756	7.5638	7.35787	7.17018	6.80777	6.64224	7.05069	7.65879	7.11042	7.42415	7.56535	7.47003	8.12985	8.03157	7.73869	7.70183	7.53311	7.08612	7.68693	7.87107	7.67459	7.25826	7.84363	7.92509	6.99365	6.75866	7.01457	7.8443
Abhd3	5.62622	6.49487	6.0632	6.07741	6.33831	6.12624	7.92016	7.98534	8.31697	7.86099	7.50619	8.25814	7.13011	6.54462	6.78558	6.49759	7.18825	6.60365	8.84953	8.97591	9.58887	8.18201	8.66162	8.88757	6.53951	6.01047	6.43446	6.55115	6.15142	6.13163	7.96955	8.12669	7.23299	7.42404	7.36271	6.99826	6.75991	6.80845	7.42557	7.03346	6.90893	6.50584	7.4489	8.55119	8.92674	7.93989	9.52606	8.84709	6.40928
Abhd4	6.85903	6.73214	6.7415	7.09376	7.38129	6.95765	6.70252	6.91795	6.8076	6.88898	6.99607	6.94426	6.18466	5.99675	6.64855	6.41425	6.38908	6.56911	7.17397	7.49028	7.45949	7.59089	7.7473	7.15994	6.97322	7.66799	6.47675	6.65415	6.77509	6.91265	6.79437	6.75143	7.16919	6.70017	6.73233	6.52255	6.05701	6.24981	5.9376	6.15369	5.88025	6.0366	7.81505	7.93381	7.48119	7.31609	7.54684	7.43802	6.9889
Abhd5	8.59837	8.70744	8.44086	8.61807	8.46311	8.29106	7.95114	8.17766	8.36582	8.3149	7.55776	8.57906	5.80844	5.56978	5.99762	6.14642	5.92019	5.63408	8.24588	7.75486	7.89189	7.32745	8.19959	8.08574	8.81339	8.71694	8.40372	8.44721	9.04791	9.02357	7.85579	8.05762	8.16862	8.49316	8.3093	7.88275	6.34728	5.94767	6.34156	6.15128	5.97617	6.21633	7.18827	7.79389	7.60306	8.09785	7.8848	7.8438	8.01291
Abhd6	5.89838	5.8318	6.12619	6.17125	5.80457	5.80059	6.07178	5.90401	5.97049	6.3827	6.03883	5.82816	6.03726	5.94648	5.71557	6.06566	5.67001	5.73324	6.11678	6.52237	7.29096	5.93556	6.68536	6.18474	6.42414	5.97533	5.91806	6.3003	6.32516	6.30806	6.3694	6.4914	5.97477	6.27001	6.37568	6.97897	5.7467	5.69674	5.53949	5.82583	5.50899	5.60028	6.7407	7.51625	7.19919	6.15455	6.47442	7.02699	6.4132
Abi1	10.9635	10.7516	10.7316	10.9416	9.16938	10.3416	10.2856	10.5549	10.3858	10.4846	10.3167	10.4793	9.80658	10.0261	10.1478	10.111	10.2066	10.1881	10.2142	10.4215	10.0114	10.5435	10.6329	10.6379	11.179	11.1653	11.0945	10.984	10.737	10.8226	10.3523	10.49	10.7385	10.2747	10.4654	10.4163	10.2531	10.3747	10.1909	10.2531	10.3063	10.5426	10.4371	10.857	10.971	10.6326	9.83059	10.4161	10.0602
Abi2	9.26105	9.37966	9.35963	9.15676	9.17556	9.62352	10.2803	10.0512	10.2594	10.0823	10.2479	10.4359	9.86784	10.0176	9.9071	9.91357	10.0105	10.1142	10.5751	10.5425	10.7239	9.64754	9.88578	10.1494	9.35192	9.70239	9.07227	9.25046	9.67204	9.39728	10.3464	10.234	10.138	9.84351	9.89737	10.1727	9.87301	9.82416	10.0902	9.78051	9.87085	9.74074	9.18481	9.31984	9.19293	10.5852	10.5857	10.5837	9.16646
Abi3	6.62987	6.4864	7.31853	6.94276	6.55619	6.91586	5.34864	5.30483	5.52978	5.55307	5.42078	5.55309	5.38966	5.44576	5.42105	5.42019	5.36143	5.33872	5.4256	5.42489	5.53486	5.43254	5.32958	5.38026	6.93738	6.45277	6.78963	6.52327	6.50888	6.41437	5.5447	5.30708	5.3622	5.53798	5.59989	5.35893	5.404	5.36571	5.44934	5.39559	5.32441	5.30093	5.32013	5.30235	5.3131	5.32795	5.44558	5.3069	6.7596
Abi3bp	5.16556	5.11877	5.08296	5.10544	5.23677	5.35797	5.44983	5.39261	5.32731	5.32419	5.2632	5.4954	5.14229	5.13548	5.087	5.07166	5.10822	5.08857	5.23742	5.05668	5.14599	5.05578	4.94762	5.04021	5.09935	5.245	5.16246	5.19212	5.17955	5.14501	5.30517	5.47189	5.2354	5.29827	5.21827	5.16125	5.15467	5.03662	5.11556	5.09887	5.12978	5.02288	5.1272	5.10869	5.0185	5.3401	5.30964	5.37371	5.1438
Abl1	8.4983	8.52997	8.49513	8.64095	7.15465	8.34661	8.57841	8.95587	8.62139	8.65976	8.97022	9.06869	8.04023	8.05923	7.97477	8.22357	7.70136	8.05169	8.03663	7.78014	7.60279	8.32791	8.15748	8.22227	8.3811	8.62943	8.48077	8.56279	8.61398	8.6794	8.807	8.43151	8.55645	8.65507	8.36553	8.67188	8.17698	8.43874	8.21562	7.5963	8.18342	7.83554	8.02003	8.63573	8.30321	8.52133	8.24628	8.20533	8.01995
Abl2	7.54159	7.35392	7.69365	7.58529	7.16482	7.25688	6.92747	6.72262	7.16704	6.73195	6.67739	7.37856	8.58968	8.49693	8.57814	8.73265	8.51965	8.3395	7.19365	7.04668	6.73791	6.87692	7.41028	7.26836	7.62784	7.59945	8.29881	7.68383	7.78329	7.69159	7.24747	6.3651	6.47661	7.26119	6.58129	6.72527	8.65159	9.07343	8.72437	8.56905	8.61676	8.67347	6.53767	7.19037	7.08575	6.29851	6.99544	7.16126	7.23239
Ablim1	6.76688	6.06006	6.44299	6.80163	6.20504	5.80712	5.52813	5.37383	5.50276	5.51131	5.38763	5.48363	5.28437	5.40468	5.13988	5.27082	5.20103	5.28872	5.65617	5.1109	5.4438	5.42793	5.16916	5.06166	7.11251	5.99182	5.97702	6.60767	6.57341	6.77028	5.60366	5.37369	5.35748	5.54189	5.61484	5.56456	5.32686	5.2734	5.35424	5.18714	5.39354	5.18194	5.92462	5.90514	5.57621	5.70073	5.70164	5.90071	5.94992
Ablim3	4.96667	4.9045	4.91446	4.94516	5.11616	5.02077	5.13882	5.11088	4.91211	5.04826	4.98595	4.96615	5.08702	4.8157	4.85571	5.0326	4.86922	4.88486	5.55048	6.02302	6.22512	5.22094	5.6347	5.38685	4.94474	5.06367	5.10195	5.43209	5.08648	5.02871	5.1271	5.10875	5.16069	4.88049	4.91086	5.00657	4.9484	4.88722	4.88597	4.84016	4.85029	4.91733	4.89072	4.96388	4.97485	5.66962	6.11464	6.08021	5.05049
Abpe	5.7959	5.94016	6.2351	5.78579	6.06659	6.21741	5.70702	5.81201	5.49564	5.75773	5.9517	5.90578	5.93612	5.94557	5.9456	5.98765	5.97157	6.08793	5.75222	5.74646	5.80804	6.0202	5.70609	5.90038	6.24469	5.91462	5.95629	5.83916	5.7111	6.00232	5.82603	5.87887	5.78124	6.15386	5.72301	5.65149	5.91352	5.73431	5.89868	5.91319	6.01108	5.77821	5.79217	6.22907	6.13506	5.77482	5.69502	5.73734	6.03203
Abr	7.1063	7.02301	7.12301	7.11896	6.58393	6.73418	7.50937	8.00247	7.95975	7.56795	7.87538	7.88159	7.10387	6.86771	6.87247	6.60865	6.64853	6.81662	7.20456	7.39779	7.40109	7.34115	7.42718	7.748	7.01687	7.30525	7.04134	7.08861	7.25908	7.1128	7.90266	7.85476	7.41967	7.79161	8.02197	7.97236	7.09871	7.31723	7.48544	6.79375	6.65874	6.74329	7.02743	7.36217	7.34687	7.46057	8.382	7.74938	6.92961
Abt1	6.65027	6.61612	6.6022	6.5618	6.30076	6.48732	6.10546	6.27127	6.52847	6.39915	6.49025	6.24743	6.94003	7.42638	7.69452	7.46753	7.63948	7.49737	6.34169	6.42025	6.46833	6.32883	6.82046	6.63446	6.57355	6.22342	6.26661	6.47831	6.32829	6.55234	6.44541	6.46223	6.6937	6.62796	6.68334	6.42096	7.42428	7.46604	7.20147	7.71487	7.31223	7.51903	6.30434	6.75901	6.97701	6.2774	6.71824	6.19075	6.85875
Abtb2	5.98544	5.99766	5.85699	6.11475	5.7723	6.1349	5.83906	5.86658	5.62626	5.95768	6.12227	5.70277	5.62573	5.57015	5.79442	5.77271	5.67399	5.5705	5.90716	5.9094	6.02494	6.65351	7.0961	7.27327	6.1492	6.4483	6.21397	6.78137	6.4555	6.2913	5.82235	5.86089	5.84922	6.1626	6.01568	6.05204	5.67076	5.54373	5.58954	5.72492	5.66869	5.61792	7.38862	8.03004	7.65283	5.94655	5.92575	6.05505	5.7896
Acaa1a	6.18277	6.22667	6.29515	6.15764	6.54649	6.28148	6.32246	6.24826	6.3067	6.26171	6.24028	6.14373	6.26498	6.264	6.27203	6.07327	6.14864	6.20694	6.21409	6.38555	6.47963	6.28072	6.26852	6.33262	6.07717	6.01422	5.99946	6.14701	6.04489	6.20875	6.18863	6.25958	6.57653	6.22728	6.24402	6.27478	6.06255	6.22544	6.28806	6.307	6.2063	6.36631	6.43602	6.23251	6.30399	6.29391	6.35099	6.1957	6.19007
Acaa2	8.40722	8.8426	8.1528	8.68504	7.4372	7.95928	10.8095	10.5893	10.3807	10.3753	10.6811	10.7956	7.16866	7.05117	7.24389	6.53237	7.38907	7.44674	11.3678	11.3727	11.2855	10.7961	11.0713	10.9936	8.62934	8.42598	6.91901	8.59764	8.93568	8.82885	10.8748	10.6388	10.6455	10.6197	10.4358	10.5763	7.62253	7.86402	7.56961	6.93013	7.22095	6.50927	9.3483	10.0187	10.0868	10.8722	11.155	11.145	7.92102
Acaca	5.95142	6.17766	6.00978	5.69132	6.08963	5.80581	7.09022	6.0235	6.6848	6.77963	7.58735	6.70869	7.35245	6.70483	6.65186	7.31418	6.37432	6.90339	6.11308	6.44453	6.68129	7.08174	8.50235	8.43703	5.71397	5.62554	5.66398	5.65919	6.32625	5.68086	6.69379	6.74799	7.50973	7.10088	7.13035	6.52454	7.37485	7.51911	7.58306	6.80559	6.67908	6.73452	7.09745	6.81115	7.26171	7.26339	6.80503	7.31528	5.19318
Acad11	5.45191	5.48775	5.46917	5.51025	5.54716	5.47828	5.69456	5.34181	5.35172	5.59698	5.44069	5.56564	5.87486	5.68923	5.57867	5.82091	5.69862	5.646	5.5288	5.74467	5.70884	5.59704	5.47366	5.32706	5.42221	5.79151	5.43086	5.51087	5.50122	5.4453	5.59253	5.70775	5.69539	5.38952	5.34879	5.58264	5.6016	5.77168	5.77506	5.75069	5.70966	5.76738	5.56642	6.08524	5.91773	6.31859	6.09079	6.01729	5.42951
Acad8	7.11572	7.51128	6.98277	7.29338	6.88259	6.94474	7.29641	7.22314	7.35744	7.21592	7.06394	7.63322	7.27265	7.50019	7.73291	7.5496	7.34902	7.41542	7.67707	7.03226	7.24464	7.1827	7.63799	7.55586	7.15499	6.73918	6.68309	7.30417	7.08438	7.27233	7.01645	7.42743	7.31091	7.51523	7.65946	7.50004	7.29291	7.34668	7.3551	7.22314	7.12633	7.16046	7.33561	7.63371	7.81667	7.51773	7.60476	7.62847	7.1146
Acad9	6.64189	6.7989	6.63696	7.01007	6.72001	6.47644	7.05048	6.52059	6.57552	6.70653	6.6163	6.67089	6.70603	6.42451	6.48176	6.37857	6.69337	6.57767	6.5942	6.49638	6.34167	6.64602	6.53535	6.8205	6.82285	6.59606	6.72972	6.61419	6.62597	6.57855	6.99491	6.71331	6.89494	6.73032	6.87766	6.6901	6.34037	6.36906	6.35012	6.33198	6.39971	6.38834	6.71944	7.04542	7.01144	6.72654	6.35633	6.71131	6.58943
Acadl	8.99321	8.89914	8.92825	9.25922	7.88772	8.64467	9.07687	8.95074	8.9527	9.1764	8.96001	8.8457	7.85174	8.73265	8.69381	7.9212	8.29925	8.38928	10.3649	10.1432	10.2927	8.6843	9.66963	9.67467	8.73796	8.3681	8.19421	9.02998	9.36424	9.50047	9.18675	9.75166	9.30375	8.65118	8.91735	9.27191	8.83499	8.89954	8.91853	8.79132	8.63228	8.91674	9.07844	9.18492	9.09013	10.4572	10.8494	10.4587	8.87612
Acadm	7.75316	7.97846	7.71994	8.11223	8.78155	8.05915	8.15606	7.84042	8.23073	8.19572	7.81086	8.38163	9.59565	9.56923	9.76534	9.336	9.61582	9.69679	9.19335	8.35784	9.27249	8.72876	8.7492	8.42128	7.87509	7.75476	7.96165	8.18065	8.39637	8.03377	8.72314	8.79563	8.62571	8.46058	7.95372	8.63292	9.18447	9.34139	9.1158	9.25188	9.27268	9.41085	9.18769	9.43234	9.51134	9.04877	8.92418	9.5042	8.34411
Acadsb	7.47649	7.50485	7.56812	7.74305	7.75056	6.51696	9.00653	9.23531	8.98537	9.09552	9.08366	8.89679	7.39927	7.53609	7.36641	7.85612	7.98199	7.87372	9.49648	9.67982	9.33812	9.77529	9.3066	9.28791	8.12682	7.86214	6.91233	7.6955	8.09557	7.36809	9.29784	9.00413	8.87166	9.00029	8.84922	9.06137	7.57465	7.57907	7.94954	8.22959	8.20735	8.13041	8.76575	8.70343	8.62263	9.61064	9.47961	9.41446	7.97022
Acadvl	7.637	7.51075	7.48487	7.52723	7.12995	7.50981	8.05536	8.21253	8.16445	8.02615	8.22976	8.27187	7.76113	7.8428	7.94726	8.07486	7.6261	7.8547	9.22452	8.9385	8.91225	8.80259	8.56895	8.71827	7.69721	7.47423	7.42164	7.62411	7.71468	7.82469	8.35271	8.24673	8.25868	8.41046	8.36738	8.03209	8.29315	8.6053	8.27026	7.96795	8.13216	8.05008	7.90734	8.40746	8.26544	8.82483	9.23748	9.05258	7.32067
Acap2	9.22077	9.00951	9.06406	9.26579	9.04527	8.54422	8.63707	8.77913	8.53143	8.59259	8.56342	8.70249	8.1383	8.05811	8.24211	8.21718	8.32722	8.05237	8.50309	8.59953	8.3212	9.15135	8.63279	8.45334	8.98297	9.11514	8.8203	9.12657	9.17127	9.11795	8.57641	8.83693	8.39743	8.50998	8.48003	8.91887	8.19381	8.25341	8.12618	8.36857	8.47983	8.42805	7.82565	8.33021	8.17924	8.84325	8.61627	8.58906	8.84962
Acap3	5.90383	6.07968	6.07772	6.02087	6.26983	6.32018	5.89906	5.81678	5.90043	5.91899	6.13956	5.9395	5.9039	5.86332	5.90014	5.73347	5.82589	5.80716	5.79485	5.93792	5.70095	5.90325	5.83466	5.9428	6.09469	6.08507	6.01356	6.03159	6.07062	6.12437	5.92453	5.86218	6.04751	5.88621	5.91059	5.74544	5.77395	5.91643	5.70267	5.90522	5.80015	5.9653	5.76055	5.91177	5.89071	5.76435	5.83856	5.80793	6.08348
Acat1	7.96265	7.96813	8.04835	8.15526	8.12732	7.9486	7.93107	7.9964	7.93381	7.95807	8.27497	8.09372	7.24035	6.9892	6.98316	7.18921	6.82486	6.81319	8.01755	8.05899	7.89845	7.91861	8.27091	7.82533	8.21599	8.31142	8.3975	8.66689	8.56968	8.85025	8.19938	8.17745	8.04905	8.54384	8.54836	8.65345	7.15972	7.23179	7.48286	7.19325	7.27704	7.41047	8.15475	8.05237	8.24404	8.08966	8.42944	8.16729	8.40919
Acat2	6.95552	7.12678	6.99325	7.31445	6.8873	7.19053	6.95427	6.72639	7.02295	6.8366	6.6996	7.03266	6.98145	7.09079	7.65685	6.83049	7.19321	7.28705	6.54894	6.67271	6.69521	6.73117	6.63	6.54959	7.16185	7.1446	6.75475	6.80329	6.99994	6.94034	6.70493	6.65897	7.01362	6.79782	6.90925	7.03611	7.60755	7.33753	6.91555	7.24546	6.99165	7.33059	6.24765	6.82599	6.17952	6.12308	6.53281	6.37753	6.39323
Acat3	5.42124	5.51524	5.43101	5.46917	5.4661	5.37588	5.45778	5.58986	5.44004	5.46514	5.43605	5.48642	5.5596	5.58503	5.52424	5.35774	5.84695	5.59572	6.58097	5.93324	6.34041	5.57733	5.68098	5.91871	5.3923	5.83404	5.5735	5.6476	5.41044	5.46729	5.37801	5.55278	5.43534	5.44719	5.56764	5.40308	5.49079	5.51853	5.42959	5.59063	5.36684	5.52701	5.24183	5.12299	5.39925	5.52542	5.43639	5.29585	5.44946
Acbd3	8.72221	8.64167	8.41015	8.62282	8.03062	7.76675	8.85515	8.72925	8.84815	8.66414	9.27497	9.27711	8.88452	8.65683	9.05681	8.68947	8.76817	8.85814	8.83051	8.72933	8.88072	8.27685	9.10978	8.60132	8.7776	8.37577	8.55813	8.76444	8.97345	9.13651	8.80235	8.94686	8.97404	9.05542	9.03596	9.2014	9.05483	9.37097	9.28366	9.21084	8.9342	9.18269	8.72516	8.87283	8.86987	8.44946	8.6643	8.67992	8.52499
Acbd4	5.62485	5.38552	5.54521	5.46326	5.33626	5.9095	5.54152	5.43003	5.54892	5.47751	5.6687	5.64428	5.5717	5.61992	5.77531	5.63698	5.68734	5.50888	5.78953	5.89405	5.74416	5.67475	5.64586	5.69982	5.4225	5.55867	5.58352	5.57224	5.40674	5.66336	5.71133	5.85155	5.85273	5.64136	5.74157	5.60054	5.58036	5.50384	5.62104	5.50362	5.36018	5.50738	5.78338	6.07401	6.04837	5.84482	6.00811	6.12388	5.62063
Acbd5	8.87646	8.48604	8.37219	8.95845	7.30787	7.56751	8.8789	8.83221	8.97954	8.5565	8.77645	8.6375	8.41529	8.54804	8.684	8.4186	8.25177	8.72455	9.49526	9.53436	9.21436	9.06099	9.13768	8.9339	8.75827	7.83844	7.83485	9.3481	8.89065	9.06587	8.82193	9.19062	8.78876	9.07984	9.12621	8.86147	8.28841	8.48445	8.49371	8.19902	8.63336	8.57494	9.13213	9.68926	9.23149	9.42135	9.19151	9.43775	9.14209
Acbd6	9.5679	9.22523	9.2555	9.50406	9.14721	8.79715	9.31322	9.4778	9.65143	9.6698	9.69202	9.69863	9.41085	9.7195	9.72368	9.45982	9.83527	9.5124	9.37593	9.68823	9.46374	9.47894	9.4367	9.60334	9.23021	9.33277	8.77268	9.4473	9.14692	9.32219	9.36699	9.44739	9.20211	9.45041	9.87855	9.44698	9.68464	9.86994	9.74888	9.52747	9.57014	9.56274	9.7407	9.88255	9.9489	9.35089	9.51197	9.33636	9.45867
Accn2	5.83059	5.78832	5.8972	5.7689	5.85675	5.77875	5.84323	6.07354	5.86751	6.01208	6.04541	5.84173	5.74457	5.6957	5.88451	5.76174	5.60214	5.5469	6.10649	5.94666	5.97383	5.90892	5.79385	5.93991	5.70754	5.68184	5.73455	5.99353	5.85941	5.89214	5.83474	5.98569	5.8686	6.14441	5.86471	5.85284	5.72772	5.68055	5.69044	5.67619	5.68078	5.8417	5.79523	5.86601	5.81775	5.78325	6.06951	5.79432	5.80667
Acd	6.93889	7.04797	7.19129	6.93206	7.45289	7.00128	6.6907	6.92788	6.77668	6.71478	6.86791	6.74279	6.99145	6.83279	6.90464	6.90145	6.8157	6.65915	7.01495	7.00738	7.00502	6.90636	6.83332	6.92173	6.92323	7.02044	6.78872	6.73524	6.88486	7.02066	6.80287	6.90538	6.97016	6.61776	6.84972	6.58216	6.67546	6.77471	6.70488	6.83622	6.76186	6.74961	6.76289	6.76363	6.84553	6.86393	6.9928	6.99321	7.44475
Ace2	5.44599	6.97874	5.4955	5.63318	5.44977	5.86522	9.55205	9.2218	8.6706	9.18253	9.3326	9.22943	5.2195	5.43101	5.26745	5.16218	5.23004	5.22162	5.25865	5.19805	5.22399	5.25283	5.19369	5.21172	5.6477	5.96833	5.23354	6.84863	6.78083	5.94867	8.02664	8.72045	9.26249	8.16081	8.15111	8.3917	5.27467	5.02602	5.51539	5.23544	5.14975	5.25157	5.25196	5.1611	5.35619	5.20212	5.26646	5.20473	5.49359
Acer2	5.46722	5.40555	5.46854	5.26199	5.23928	5.47307	5.41969	5.12333	5.22621	5.3757	5.33111	5.43297	5.82253	5.81012	5.90363	6.05168	6.14049	5.80806	5.47873	5.41886	5.73225	5.50786	5.71776	5.70052	5.82604	5.54838	5.49881	5.45268	5.31314	5.48552	5.20555	5.43888	5.52642	5.14133	5.30858	5.26879	5.73929	5.32671	5.28609	5.55563	5.85817	5.62953	5.5361	5.30261	5.30278	5.495	5.36904	5.51031	5.60216
Acer2	8.70865	8.55801	8.21565	8.52482	7.24159	8.18266	5.74334	5.73084	7.44936	5.70481	6.18819	6.33126	5.4935	5.24661	5.24403	5.03081	5.31725	5.34526	5.39218	5.30547	5.06596	5.35785	5.27866	5.32549	8.39469	7.45914	7.89354	6.93584	8.49441	8.09582	5.40104	5.56775	5.30506	5.53078	5.40935	5.38187	5.14363	5.58518	5.31951	5.55337	5.32834	5.28016	5.03946	5.20291	5.24925	5.22803	5.38896	5.42213	8.90859
Acer3	6.88074	7.19148	7.1033	7.71253	7.62923	7.55974	6.35092	6.45164	6.75947	7.41688	7.5631	6.3847	6.78701	6.62739	7.04429	6.53563	6.79249	6.63412	6.94168	6.65535	6.41456	7.15021	7.59682	7.14703	7.15699	7.51865	6.18741	7.51253	7.38748	7.12437	6.14238	6.65455	6.64139	8.53918	8.1388	8.61814	7.80019	7.74945	7.64875	6.76165	7.24144	6.82814	6.94894	7.49184	7.2126	6.66188	7.17663	6.60031	6.97966
Acin1	9.30849	9.17515	9.32384	8.95257	8.79484	9.51778	9.35169	9.43567	9.36177	9.41144	9.44275	9.48597	9.19951	9.30192	9.33128	9.34737	9.31798	9.51956	9.61614	9.60557	9.66847	9.29556	9.33857	9.30279	9.24744	9.07835	9.43159	9.05785	9.13764	8.85677	9.55298	9.55645	9.3756	9.35181	9.32983	9.43461	9.0601	9.26044	9.35394	9.32333	9.39352	9.32294	9.57495	9.46337	9.62156	9.5959	9.46081	9.46091	9.09874
Acly	8.07682	7.96869	7.75475	8.13722	8.02544	7.29703	8.00641	8.04085	7.90239	8.00245	8.50044	8.60669	7.50805	7.26215	7.25701	7.42312	7.11404	7.33688	7.79246	7.87365	7.66362	8.48909	8.57328	8.31323	7.78924	7.85642	7.91025	8.15387	7.94887	8.18928	7.75173	7.78477	7.99361	8.05562	7.86165	8.07885	7.55128	7.90056	7.50436	7.26428	7.38467	7.53302	8.28323	8.76681	8.51631	7.87143	7.69238	7.71638	7.73851
Acn9	6.59688	6.93182	6.27846	6.826	7.70903	6.68036	6.66948	6.84002	7.26163	6.84886	6.66871	6.5063	6.40385	6.06049	6.32404	6.33853	6.18916	6.38693	7.22307	7.36563	7.03081	7.11719	6.88567	7.48202	6.72023	6.82841	6.61566	6.6071	6.50204	6.88149	6.3688	6.91031	6.7002	6.61704	6.7956	6.52305	5.89141	6.49601	6.09115	6.09354	6.43572	6.1472	6.91195	7.65504	7.14404	6.60172	7.09432	6.72275	6.43497
Aco1	7.90162	7.9359	7.69311	8.05995	7.51325	7.99043	8.37942	8.3133	8.09761	8.09597	8.21756	8.4473	8.2521	7.87309	8.24695	7.92211	7.70941	7.96555	7.8341	7.90485	7.82169	7.90362	8.06856	8.23345	8.00528	7.86945	7.71969	8.07166	7.97655	7.938	8.28891	8.33771	8.38163	7.92275	8.51599	8.66025	8.43083	8.63797	8.32158	7.71389	8.152	8.00391	8.14148	8.25279	8.33519	7.80777	8.27434	8.10627	8.13642
Aco2	9.57838	9.79247	9.73242	9.8434	10.2921	9.68258	9.91633	9.81376	9.77167	9.67975	10.0849	9.99741	10.3717	10.3258	10.1633	10.492	10.3104	10.3008	9.93581	9.9846	9.57326	9.84014	9.96895	9.6602	9.84931	9.75597	9.12166	9.56139	10.047	9.87254	9.75656	9.80232	10.093	9.8883	9.96765	9.63588	10.4696	10.5903	10.5022	10.117	10.4036	10.4113	9.87274	10.2228	10.1748	9.78301	9.88212	9.7475	9.44564
Acot1	4.95603	4.75856	4.94338	5.01944	5.15961	5.11828	5.48583	5.41836	5.44698	5.64451	5.48484	5.67194	5.22145	5.32412	5.18492	5.17961	5.19996	5.03943	6.4451	6.30532	6.78419	6.79951	6.93508	6.94517	5.10714	4.99493	4.97464	5.14611	4.90892	5.12815	5.32734	6.11273	6.06427	5.20629	5.31397	5.43399	5.4403	5.10087	5.21784	5.36781	5.24504	5.15172	6.02024	5.84143	6.1962	6.51211	6.90952	6.62656	5.19
Acot10	6.52266	6.63646	6.30477	6.80532	6.28784	6.0102	5.69943	5.52395	5.73231	5.50588	5.47761	5.8051	5.96693	6.7387	6.06256	5.82859	6.05037	5.78642	6.04466	5.24119	5.43883	5.33109	5.60297	5.69705	6.44688	6.1711	6.43277	6.49821	6.4233	6.77777	5.72935	5.37111	5.26452	5.41253	5.58608	5.75624	6.53348	6.55468	6.13224	6.34425	6.56514	5.97591	5.41729	5.35386	5.15313	5.7037	5.40105	5.63354	6.52041
Acot13	7.89583	8.12643	7.76583	7.93644	9.60602	7.1309	7.98805	8.68831	8.78309	8.30949	7.79397	7.99422	9.07441	9.29364	9.33479	9.25489	9.60521	9.25613	8.64606	8.65381	8.71958	7.8816	8.37555	7.9057	7.91816	7.38176	7.49747	7.2656	7.1357	7.79478	8.58679	8.39085	7.72983	7.98398	7.70656	8.15053	9.3782	9.08121	9.09062	9.18794	9.3745	8.42876	8.60816	8.69937	7.9508	8.27433	7.02916	8.57844	8.00051
Acot2	6.12028	6.36359	6.31612	6.12221	6.14469	6.10053	6.42047	6.41629	6.44824	6.61671	6.28172	6.40687	6.192	6.02783	6.08501	6.22375	6.11752	5.63048	6.93123	7.14291	6.74589	7.19403	6.42607	6.65857	6.19092	6.27791	6.32725	6.20008	6.23922	6.25166	6.68789	6.78064	6.30864	6.37264	6.48636	6.47416	6.29173	6.01341	6.2631	6.16303	6.15564	6.08701	6.17512	6.29784	6.35934	6.77081	7.13499	6.82142	6.53671
Acot7	6.47226	6.40732	6.58504	6.5686	6.5433	6.34039	6.45876	6.22832	6.59569	6.50999	6.44353	6.59847	6.76181	6.69513	6.82408	6.50798	6.62829	6.55355	5.9307	5.972	6.08195	6.02274	6.14812	5.88921	6.48582	6.24115	6.48671	6.53544	6.53985	6.84375	6.8694	6.50477	6.38491	6.6883	6.96967	6.72309	6.50864	6.71728	6.4062	6.95903	6.58263	7.07148	6.29724	6.41736	6.5404	6.43984	6.74752	6.29799	6.32674
Acot8	6.00004	6.08765	6.15845	5.99948	5.82888	6.21944	6.20028	6.11887	5.87384	6.04318	6.197	5.85167	6.27707	6.10652	6.251	6.43946	6.38788	6.15366	6.6529	6.24412	6.12361	5.9566	6.3711	6.20765	6.11061	6.10659	6.36388	6.10531	5.81223	5.91214	6.19921	5.93929	6.07234	6.15602	6.00653	5.8568	6.12209	6.05563	6.03951	6.08969	6.2177	6.10901	6.01229	5.92414	5.99856	6.0057	6.12784	6.30226	6.01637
Acot9	9.66043	9.72917	9.06114	9.55933	9.26066	9.64204	7.84139	7.70935	8.31525	8.05389	7.20131	8.5246	8.87506	9.31292	8.94642	8.34538	8.94326	8.57542	8.56524	8.30723	8.42517	5.80323	7.85581	7.26197	9.47095	9.4195	9.86773	9.57886	9.52899	9.68928	7.67709	7.71596	7.8294	7.57516	7.43348	7.71303	9.78298	9.5986	9.15081	9.10056	8.84434	8.69626	7.22407	7.91052	7.87377	8.45031	6.9096	7.52262	9.11189
Acox1	6.95325	6.76277	6.59518	6.9923	6.56635	6.56645	6.70137	6.83836	6.76859	6.61667	6.86285	6.8177	6.3208	6.34161	6.37289	6.22508	6.25865	6.17561	6.42758	6.96633	7.13619	6.20677	6.65592	6.59993	7.00965	7.05329	6.63914	6.87172	6.92522	6.86019	6.77029	6.90506	6.80483	6.41924	6.53458	6.56838	6.13475	6.04996	6.20742	6.36638	6.2251	6.32789	6.46711	7.05589	6.57776	6.92849	6.66332	6.93825	6.35678
Acox3	6.16736	6.29227	6.0984	6.34414	5.67978	5.81064	5.74421	5.9625	5.69624	5.7283	5.74276	5.89455	5.62032	5.48145	5.39588	5.71867	5.40556	5.35559	6.46288	6.0865	6.19856	5.54801	6.03232	6.03593	6.29664	6.14547	5.87744	6.05899	6.15708	6.15081	5.70828	5.80318	5.55242	5.69212	5.8188	5.97985	5.60746	5.36561	5.46412	5.67448	5.45025	5.53553	5.6597	5.77533	5.5154	5.80416	5.74778	5.86045	5.71279
Acp1	8.1066	8.21884	8.1486	8.36826	7.77089	8.06659	9.76814	9.83896	9.87989	9.62764	9.77651	9.73193	9.18456	9.32923	9.04748	9.52643	9.63983	9.01354	9.96156	9.361	9.74573	9.74768	9.77486	9.11536	7.94036	7.59132	7.50005	8.22281	8.00739	8.30488	9.76117	9.53757	9.58379	9.53451	9.77901	9.65129	9.42671	9.81884	9.28575	9.44414	9.33282	9.29587	8.27779	8.89962	9.20212	9.64281	9.81773	9.61668	8.32433
Acp2	7.50657	7.64221	7.47715	7.528	8.46556	7.17361	7.82124	7.73018	7.72097	7.75344	7.5247	7.81318	5.90813	6.26489	6.23185	5.82996	6.21545	6.065	7.5715	7.94247	7.96379	7.4228	7.68421	7.2501	7.53441	7.55503	6.74961	7.05806	7.37887	7.29174	7.38842	8.01658	7.80165	7.21082	7.7095	7.41727	5.63724	5.67978	6.05438	6.13499	6.15594	5.97451	7.62779	7.99457	7.56051	8.41662	8.37524	8.28129	6.51734
Acp5	5.48599	5.67949	5.53324	5.53744	5.38693	5.37693	5.6051	5.57366	5.38447	5.64206	5.49872	5.45351	5.32157	5.35708	5.33834	5.38702	5.16857	5.19248	6.41948	5.87405	6.28082	5.7629	5.90574	5.6728	5.82451	5.49329	5.65638	5.4727	5.41527	5.43116	6.03965	5.6239	5.58952	5.71972	5.44253	5.5395	5.43916	5.68662	5.50928	5.30032	5.33365	5.35705	6.08455	5.86016	6.78818	6.67827	6.16656	6.14708	5.69276
Acp6	6.81174	6.99616	6.71522	6.89662	7.56019	6.63873	6.33553	6.60529	6.78499	6.65171	6.51255	6.5135	7.52215	7.12599	7.28787	7.27237	7.56168	7.01803	6.44585	6.66184	6.51312	6.30853	6.47609	6.77475	6.8863	7.1982	6.6312	6.92262	6.5929	7.02298	6.40622	6.23294	6.63892	6.65917	6.65748	6.73016	7.16187	7.20459	7.15818	7.46554	6.93547	7.03088	6.64755	6.81038	7.00622	6.35224	6.62286	6.61298	6.70493
Acsbg1	5.85163	5.72341	5.96062	5.91641	5.65213	5.74572	6.06902	5.99315	5.83903	5.85853	5.92429	5.80049	6.27015	5.9762	6.00851	6.03901	5.98532	5.7871	6.40064	6.50352	6.46562	6.27183	6.0502	6.08622	5.89729	5.85371	6.25434	7.32479	6.89857	7.21928	6.60882	6.25532	6.2562	6.63587	6.53282	6.48892	6.01841	5.99783	5.64123	6.13433	6.38676	6.37322	7.12923	6.35021	6.53028	6.80848	6.51592	6.8122	6.07285
Acsf3	5.84841	5.86906	5.92554	5.98642	5.82708	5.71023	5.74621	5.89661	5.86306	5.82485	5.65773	5.92853	5.85641	6.02958	5.94203	6.16866	6.0779	5.77795	5.6121	5.7591	5.92892	5.5786	6.05308	5.68463	5.69971	5.7856	5.81553	5.69319	5.72581	5.75787	5.5955	5.68246	6.13355	5.73919	5.66894	5.80286	6.11305	6.40715	5.96426	6.15063	5.98088	6.39726	5.78	5.99977	6.02226	5.89737	6.75467	5.70426	5.84908
Acsl1	6.71328	6.55443	6.68207	6.5107	6.579	6.40326	6.61504	6.43912	6.46323	6.4126	6.96113	6.93161	8.20737	8.33704	8.27325	8.38323	8.33026	8.16562	6.34185	6.32022	6.15924	6.28388	6.34761	5.95274	6.82132	6.39872	6.2605	6.56413	6.65805	6.7201	6.72531	6.17858	6.67526	6.2881	6.23652	6.30642	8.7741	9.35932	9.16138	8.64796	8.55454	8.30856	6.39353	6.56703	6.16049	6.17639	6.36677	6.56826	6.10811
Acsl3	8.20837	8.28272	8.31507	8.35263	7.57417	8.16383	9.63838	9.34125	9.47012	9.38131	9.35465	9.50132	10.5696	10.5184	10.4698	10.3855	10.3228	10.5349	9.54514	9.58657	9.53951	9.2044	9.89302	9.99969	8.35075	8.10779	8.35861	8.41908	8.54786	8.60644	9.4328	9.23595	9.22099	9.23193	9.14862	9.42735	10.5387	10.4604	10.6986	10.5671	10.4608	10.5283	8.67873	8.84752	8.93183	9.62807	10.1648	9.70987	8.12259
Acsl4	8.31659	8.18443	8.45229	8.52804	8.15705	8.08452	7.58689	7.59984	7.82213	7.4412	8.27537	7.95994	5.99578	6.0812	5.82059	5.83983	5.93942	5.70419	7.67052	7.68187	7.55196	7.41993	8.34578	7.67704	8.21	8.28762	7.78621	8.87193	8.7714	8.91776	7.57157	7.42797	7.32383	8.20221	8.33493	7.73742	6.46553	6.17235	6.40411	5.75242	5.667	6.11937	8.2477	8.50377	8.50555	7.52295	7.60815	7.64465	8.13289
Acsl5	9.31201	9.17713	9.39363	9.1266	8.58989	8.84348	7.58483	6.91648	7.45892	7.24335	7.21409	7.3342	6.70493	7.34892	7.22442	7.4753	7.21589	7.34473	6.29321	6.71114	6.71431	6.43158	6.8297	6.86151	8.82709	7.94113	8.44907	8.54298	8.77677	9.0371	7.42634	7.09141	7.06354	6.72082	7.08547	7.06717	7.1073	6.32917	7.20249	7.35969	6.8139	7.00577	6.93251	7.18467	6.94011	7.02195	7.5458	7.53758	8.71407
Acsm3	5.37567	5.57649	5.51782	5.42387	5.59477	5.66526	5.51732	5.58568	5.57721	6.28897	5.72645	5.75388	5.62747	5.70449	5.54806	5.79292	5.86415	5.56593	6.35823	5.93106	6.4033	7.08498	8.03985	7.81405	5.70963	5.63235	5.8591	5.52448	5.41339	5.383	6.34439	6.37586	6.0722	6.06688	5.86073	5.92308	5.65489	5.7742	5.77118	5.61339	5.67893	5.6251	7.48534	7.47211	7.04222	7.21264	6.31835	7.99901	5.85831
Acss1	5.33525	5.28303	5.25085	5.28189	5.5864	5.25852	5.75144	5.56444	5.57619	5.54889	5.89072	5.65607	5.72314	6.24099	6.08003	6.09408	5.77005	5.89873	5.89734	6.10934	5.84361	5.48092	5.48677	5.55926	5.20676	5.15915	5.43843	5.35136	5.48446	5.4305	5.73434	5.64	5.51065	5.8909	5.73034	5.49994	5.76423	5.6962	5.88214	5.48787	5.42888	5.65283	5.37164	5.3418	5.25888	5.76497	6.22288	6.07651	5.36434
Acss2	5.0272	5.0853	5.04129	5.16118	5.16951	5.00818	5.30252	5.31256	5.24486	5.38063	5.28665	5.37794	5.33949	5.23699	5.20932	5.20737	5.02216	5.27565	5.37568	5.39043	5.2753	5.96154	6.07993	5.31761	4.89975	4.98865	5.20088	5.2011	5.17716	5.17532	5.13822	5.34321	5.26644	5.50061	5.38304	5.67491	5.46205	5.79439	5.39829	5.26286	5.29346	5.17414	6.68815	7.09615	6.83139	5.29697	5.41955	5.42787	5.22712
Acta2	5.72731	7.09678	5.20819	5.84932	5.75637	6.37955	7.40139	8.02092	7.10745	6.62609	7.30255	7.3918	5.44813	5.33636	5.5011	5.30824	5.44157	5.26326	6.38834	6.06824	5.99539	5.4529	5.59303	5.40762	5.7395	5.88933	5.40557	6.39423	6.1294	5.79952	8.31499	6.37373	8.51049	9.21907	9.31889	7.72609	5.07296	5.19367	5.38067	5.05345	5.06396	5.17588	5.33708	5.50353	5.07545	6.27378	7.03462	6.3847	5.78784
Actb	12.921	13.0898	13.0541	13.0607	13.1157	13.0367	12.9704	12.9232	12.8474	12.7997	13.0109	13.1094	12.3386	12.3657	12.4247	12.4544	12.4106	12.4407	12.5294	12.5543	12.5764	12.7906	12.7528	12.7441	13.0735	12.9865	12.9688	13.0159	13.1131	13.0882	13.0295	12.8819	12.911	12.8809	12.9575	12.9616	12.0791	12.0295	12.2882	11.9889	12.0936	12.0842	12.5318	12.7919	12.7594	12.7497	12.6851	12.5685	12.9058
Actc1	6.00646	6.19836	5.71694	5.74531	6.38418	5.65113	7.33484	8.453	7.03289	6.61271	6.51895	8.31111	5.89223	5.80272	5.85464	5.72309	5.62988	5.72969	5.81194	5.91632	5.98795	5.76145	5.7288	5.72969	5.59048	5.68709	5.85787	5.985	5.5955	5.75965	7.33106	6.17689	8.9766	6.11036	6.46525	5.82914	5.67056	5.46637	5.8816	5.84236	5.58277	5.62397	5.51285	5.61678	5.45642	6.0132	5.62702	5.96819	5.79576
Actl6a	8.66756	8.9725	8.63022	8.59036	8.89844	8.79702	8.51839	7.99195	8.76595	8.59021	9.02123	8.83324	9.40397	9.43632	9.61113	9.38688	9.56326	9.50291	8.07105	7.62975	7.27431	7.97592	8.32243	8.50373	8.45157	8.71413	7.63479	8.32963	8.67657	8.88764	8.18732	8.47231	8.35867	8.31062	8.27388	8.18816	9.48009	9.64646	9.44858	9.53879	9.63301	9.91901	8.23278	8.47569	8.28687	7.61091	8.17777	7.8386	8.49249
Actn1	7.68731	7.86065	7.84712	7.77012	8.7109	7.55436	8.72582	9.21374	9.13647	9.14084	9.36095	9.17895	9.29146	9.11406	9.41205	9.1636	9.07472	9.1811	7.96758	8.10856	8.13553	8.66562	8.91338	9.03218	7.03386	7.47398	7.10619	7.7211	7.8428	8.12012	8.6646	8.62201	8.90372	9.15986	9.11085	9.22205	8.87668	8.85324	8.96109	9.16797	9.10355	9.32095	8.4119	8.71001	8.58293	7.64051	7.63976	7.87602	7.11303
Actn1	5.6675	5.33489	5.33736	5.47223	5.41004	5.38332	5.61546	5.54031	5.98649	5.88781	5.40042	5.76992	5.6836	5.77792	5.5575	5.66789	5.92422	5.94243	5.85108	5.52043	5.67719	5.8623	5.65306	5.89184	5.48113	5.11808	5.45291	5.53741	5.5343	5.426	5.59855	5.65351	5.87061	5.87123	5.59736	5.55901	5.61913	5.84297	5.64147	5.86935	5.64718	6.44208	6.17603	5.9963	6.45041	5.56554	5.63026	5.56672	5.39843
Actn2	5.23204	5.16667	5.19887	5.14905	5.27431	5.22078	5.08833	5.12876	5.13903	5.17417	5.14352	5.15038	5.56321	5.56263	5.70992	5.52404	5.58643	5.61224	5.19809	5.23723	5.13376	5.15904	5.17102	5.12205	5.08319	5.24835	5.23046	5.32772	5.20046	5.15443	5.08883	5.16011	5.07534	5.16607	5.13647	5.0794	5.58617	5.36848	5.38889	5.91755	5.90044	5.97987	5.16986	5.15625	5.11265	5.12467	5.14397	5.15778	5.29924
Actn4	10.2124	9.99861	10.2223	10.2246	10.4013	9.79622	9.60755	9.40767	9.4912	9.58427	9.44219	9.83548	9.67046	9.65608	9.81546	9.76453	9.85741	9.85713	9.7157	9.579	9.85505	9.55901	9.75875	10.0127	10.2584	10.4282	9.91964	10.2227	10.6115	10.6875	9.56351	9.52759	9.48413	9.42492	9.54207	9.42229	9.5323	9.60421	9.34495	9.34405	9.39198	9.51191	9.78484	10.3006	10.0302	9.4605	9.41331	9.46735	10.3042
Actr10	8.82762	8.72386	8.45939	9.0688	7.95234	7.83542	8.98042	8.64091	8.82879	8.71066	8.43152	8.89185	8.87449	9.14587	9.10947	8.93984	9.0319	8.87849	8.81837	9.09808	9.28897	8.88834	8.88204	8.61937	8.79407	8.47881	8.21403	8.90414	8.6331	8.59364	8.65037	9.04957	8.53007	8.30657	8.93952	8.73415	9.02897	8.71083	8.79708	9.06124	9.0745	9.21461	9.09594	8.79392	8.74652	8.6865	9.0754	8.9713	8.94779
Actr1a	7.71941	8.27552	8.25607	8.40785	8.17545	8.23679	8.00144	7.93428	7.85138	7.54583	8.17295	8.10309	7.36918	7.08485	7.37428	7.25291	7.12371	6.68426	7.7082	7.56054	7.58992	7.59885	7.76135	7.64933	8.63542	8.64035	8.05078	7.80782	8.43348	7.9505	7.75561	7.77863	7.70231	7.31204	7.98182	7.55638	6.53524	6.59918	6.64718	7.26186	6.97924	6.96995	7.50248	8.05732	7.68851	8.47955	8.00607	7.87798	7.90453
Actr1b	6.82119	7.05771	7.15114	6.99691	7.14401	6.51425	7.00483	7.15063	7.40208	6.85889	7.49752	7.31138	7.5945	7.33488	7.2164	6.68781	7.26596	7.2731	6.92374	6.86577	6.75534	6.68215	7.13297	6.94651	6.89974	6.80783	6.99565	6.91109	7.40114	7.45254	6.76794	6.83385	7.34183	6.64562	7.05227	6.96167	6.52805	6.84607	6.94858	7.07482	6.90055	7.01208	6.93509	6.91425	6.72716	7.42089	6.57439	6.94503	7.08098
Actr2	11.6547	11.8104	11.8713	11.7959	11.3045	11.6049	11.2461	11.3453	11.3636	11.2537	11.3088	11.3557	11.2604	11.3819	11.285	11.2568	11.296	11.269	11.5904	11.6753	11.5048	11.3372	11.6542	11.5286	11.7874	11.7434	11.8134	11.9487	11.9265	11.9472	11.3634	11.3338	11.3731	11.4327	11.244	11.4445	11.0993	11.0069	11.093	11.0308	11.0788	11.1519	10.823	10.9759	10.9	11.5448	11.5358	11.4111	11.6853
Actr3	10.6711	10.4197	10.3655	10.6353	10.1686	10.2865	10.1643	9.95244	10.21	10.0542	9.99579	10.376	10.1085	10.1435	10.2701	10.1735	9.97348	10.1944	9.794	9.96518	10.0358	10.4361	10.2613	10.0779	10.5309	10.3949	10.2149	10.5326	10.4827	10.7458	9.82971	9.80351	10.0571	10.3518	10.0818	10.2672	10.2709	10.119	10.3566	10.2447	10.2164	10.3634	10.0548	10.3275	10.3185	9.76719	10.1089	9.96726	10.1377
Actr3b	5.17945	5.15642	5.1715	5.06209	5.28577	5.27623	5.01074	5.17934	4.9372	5.17748	4.95349	5.29901	7.66559	8.12283	7.84228	6.80514	7.62134	7.57475	5.12976	5.17699	5.38031	5.30162	5.29492	5.32715	5.15082	5.27317	5.10297	5.37333	5.27427	5.29379	5.03714	5.19448	5.12112	5.14435	5.18135	5.09276	7.20139	8.16554	7.03225	7.63364	6.5219	7.23273	5.30239	5.21492	5.11664	5.34846	5.17963	5.16931	5.29315
Actr6	8.79133	8.88247	8.50961	9.0379	7.8309	8.68053	11.2276	10.975	10.8058	10.5904	10.4571	10.7606	9.89666	10.0065	9.96352	9.94321	10.0347	10.207	12.5823	12.3886	12.5837	11.662	11.5675	11.9112	8.94828	8.8505	8.15914	8.19037	8.79142	8.45242	11.2611	11.3951	10.7025	9.0289	9.61284	9.55357	9.92374	9.9185	9.88167	10.4942	10.4287	10.39	9.61795	9.6612	9.80191	12.2152	12.0736	12.2955	8.85339
Actr8	8.16489	8.19474	8.22745	7.79616	7.73403	8.20806	7.89082	7.79132	8.53523	8.09029	8.08784	8.00459	8.00803	8.27598	8.7673	8.24844	8.55103	8.406	7.7741	7.81116	7.82508	8.16547	7.80257	7.90577	8.4456	8.28766	8.01795	7.65299	8.15736	8.07087	7.92227	8.11452	8.30069	8.2466	8.07891	8.0539	8.48714	8.83978	8.82079	8.70286	8.71177	8.76362	8.47093	8.51101	8.12576	7.74024	7.80135	7.74726	8.19178
Acvr1	8.16355	8.20527	7.90574	8.15634	7.81799	7.71923	8.37572	8.21425	8.31057	8.80114	8.78931	8.80947	7.49824	7.7155	7.61721	7.41572	7.42176	7.36919	7.71714	7.17852	7.50456	7.86734	8.03461	7.85487	8.27029	7.98969	7.87085	8.32538	8.30285	8.24118	8.11113	7.84285	8.74947	8.66628	8.82538	8.75791	7.82697	7.95507	8.11558	7.15368	7.3692	7.49753	7.23969	7.75729	7.91855	7.24853	7.921	7.10974	7.78743
Acvr1b	5.56445	5.43977	5.48428	5.69815	5.58909	5.56291	5.67162	5.42103	5.55754	5.4063	5.40272	5.80304	5.63916	5.90123	5.9193	5.47994	5.76198	5.82458	5.72663	5.65651	5.65083	5.41902	5.60568	5.5216	5.45818	5.35855	5.73444	5.74333	5.36121	5.53387	5.63161	5.53531	5.37348	5.41868	5.69032	5.51707	6.09621	6.04686	6.07105	5.6369	5.81037	5.75698	5.9839	6.39597	5.7335	5.86222	5.51793	5.94366	5.40481
Acvr1c	5.18109	4.98991	5.00712	5.03419	5.1248	5.16931	6.34508	5.93201	5.98908	7.08316	7.98623	6.64303	4.93725	4.90244	4.89384	5.04512	5.03754	5.09346	5.27986	4.9759	5.11852	5.34693	4.98089	5.13937	4.99307	5.1107	5.14382	5.23105	5.20477	5.04702	5.24764	5.18188	5.37927	5.5568	6.2878	6.85085	4.83777	4.88713	4.8845	4.91324	4.88719	5.04025	5.1078	5.13453	5.15241	5.45567	5.21696	5.16838	4.96731
Acvr2a	9.31699	9.20073	8.90946	9.23713	9.00334	8.75545	9.51261	9.36798	9.38153	9.18698	9.43829	9.635	7.92012	8.05605	7.71316	7.40113	8.06783	8.0595	9.22621	9.41995	9.08497	8.30289	9.09975	9.43629	9.51725	9.13928	9.06683	9.56615	9.15046	9.16904	9.14202	9.38791	9.34698	9.03088	9.37737	9.4235	8.51735	8.90786	8.7268	8.55271	8.55372	8.24984	8.89557	9.18211	8.84101	9.15394	9.52948	9.07761	9.70488
Acvrl1	6.70413	6.7333	7.05367	7.45093	6.67916	6.71977	5.63705	5.59116	5.5642	5.60428	5.53681	5.56626	5.65778	5.53087	5.52143	5.73358	5.50101	5.70183	5.80508	5.76622	5.73737	5.72631	5.7091	5.63543	7.30841	7.07151	6.99975	6.95796	6.7479	6.84011	5.81219	5.6441	5.68411	5.88059	5.7896	5.78764	5.57541	5.50796	5.39988	5.6276	5.535	5.7436	6.08778	6.1083	6.30385	5.76526	5.88443	5.64942	6.85192
Acy1	5.37718	5.15661	5.23863	5.31358	5.41857	5.29977	5.68883	6.18558	5.59545	5.54225	6.19727	5.54751	6.47025	6.69522	6.17555	6.719	6.77091	6.5648	6.0985	5.64299	5.68381	5.85134	5.82603	5.86663	5.12844	5.27708	5.15185	5.21734	5.47292	5.3283	5.5363	5.64718	5.65789	5.4324	5.63098	5.73308	6.39371	7.0394	6.30497	6.31502	6.83895	6.71315	5.62991	5.85126	5.77998	5.63248	5.89368	6.03876	5.23805
Acy3	6.97796	6.64898	6.95148	6.72064	7.39025	6.86993	6.42482	6.42917	6.53734	6.43093	6.40711	6.69491	6.86431	6.73306	6.63226	6.57266	6.75173	6.63997	6.36696	6.1697	6.4874	6.39668	6.35618	6.55198	6.81877	7.22145	6.7117	6.81287	6.72907	6.81658	6.69455	6.5025	6.736	6.40295	6.70066	6.51873	7.01028	6.82596	6.8909	6.65303	6.79767	6.69062	6.393	6.0115	5.72366	6.25606	6.35083	6.45851	6.52077
Acyp1	9.30253	9.87166	9.59519	9.73655	9.17873	9.49299	9.86089	10.2112	9.78915	9.9533	9.84754	9.7862	9.93291	9.71927	9.6704	9.66255	9.84092	9.50736	10.3325	10.6101	10.2502	10.1532	10.0797	10.1479	9.8451	9.46367	9.69166	9.73446	9.8519	9.73195	10.0012	9.77976	9.63479	9.85334	9.97623	9.55944	9.57183	9.41294	9.11378	9.48473	9.62778	9.02395	9.69701	9.65838	10.0771	10.122	10.3626	10.255	10.2262
Acyp2	7.58475	7.80792	7.47532	7.78347	7.40407	8.38359	7.00508	7.13065	7.26576	7.36465	6.66821	7.00422	6.16104	6.3152	5.6882	5.68712	6.41998	6.00038	7.4755	6.79997	7.24577	7.1451	7.14014	7.62921	7.79715	7.69206	7.52081	7.19461	7.45047	7.60105	7.78587	7.50179	7.08322	6.91336	7.21216	7.05742	6.12137	6.12116	6.21888	5.99589	6.00416	5.93174	7.16192	6.68325	7.14411	7.54075	7.31686	7.46173	8.18445
Ada	7.24703	7.10868	7.14417	6.94911	7.00326	6.8365	5.54151	5.50499	5.51048	5.67234	5.62879	5.65746	5.50962	5.74044	5.72997	5.69469	5.68101	5.57348	5.74686	5.6644	6.37189	5.49903	6.18707	5.75357	6.41481	5.72877	5.64374	6.04028	6.1061	6.12327	5.62981	5.50397	5.45542	5.61527	5.9014	5.52841	5.74069	5.83536	5.68079	5.35419	5.33617	5.34486	6.7296	6.70264	6.19156	5.88242	5.49028	6.00275	6.05951
Adad1	5.13023	5.21873	5.2729	5.24788	5.34223	5.08992	5.01174	5.12416	5.0497	5.12613	5.10856	5.09906	5.43331	5.3906	5.32354	5.35245	5.3722	5.39598	5.2637	5.22168	5.20576	5.24008	5.11598	5.01306	5.21734	5.40782	5.33114	5.39329	5.2004	5.10231	5.07542	5.18249	5.21555	5.25984	4.93413	5.16248	6.50092	6.47741	5.80364	5.72139	5.63303	6.2582	5.1942	5.31907	5.39035	5.15085	5.23142	5.16233	5.33757
Adal	7.47109	7.27613	7.66309	7.66053	7.636	6.42719	7.83672	8.42845	8.06035	7.83881	8.0556	8.11256	8.66718	8.43692	8.41537	8.57232	8.62345	8.55929	8.01759	8.11902	8.14166	8.21195	7.744	7.98193	7.70039	7.34123	7.80056	7.45189	7.24623	7.37695	7.95641	8.14678	7.52112	8.00193	8.14324	8.53614	8.69081	8.65392	8.68437	8.68251	8.74596	8.67432	7.55891	7.90878	8.25352	7.81728	6.88613	7.75753	8.54758
Adam10	10.0064	9.81688	9.86485	10.2118	10.0091	9.70287	9.87831	10.0645	9.87418	10.0162	9.89739	10.24	6.62779	7.61029	6.92564	7.30518	6.76789	6.87293	10.6449	10.6204	10.7589	10.5066	10.8344	10.4372	9.95879	10.4661	9.92621	10.4039	10.5095	10.5135	10.2422	10.2397	10.2053	10.3821	10.2296	10.2975	8.299	8.52915	8.49953	7.3811	7.78928	7.97074	10.8031	11.1048	10.9809	10.9095	10.8358	10.9339	10.1956
Adam12	7.8434	7.80202	7.92483	7.56	6.79216	7.06975	6.19274	5.9993	5.99192	5.78296	5.73343	6.36049	5.19508	5.25092	5.31178	5.22306	5.21804	5.30156	5.29705	5.36413	5.27311	5.52699	5.68486	5.36234	7.36163	7.07361	6.64165	7.67476	8.02815	7.91285	5.60919	5.44541	5.76147	6.91838	6.44462	6.3599	5.29731	5.26383	5.41191	5.38834	5.32294	5.35889	6.50753	6.72477	6.50715	5.15742	5.2121	5.22543	6.28593
Adam15	6.43406	6.82644	7.11305	6.26465	7.00072	6.36262	5.35707	5.38818	5.43198	5.45152	5.63589	5.48929	5.35804	5.25283	5.31421	5.33139	5.57536	5.23708	5.61011	5.35368	5.55469	5.51973	5.36991	5.25595	6.6876	6.76024	6.92211	6.40852	7.22596	6.62325	5.4037	5.51249	5.54089	5.48972	5.32587	5.32964	5.40491	5.32111	5.52479	5.34132	5.28706	5.39375	5.22415	5.23257	5.35537	5.40814	5.27063	5.40574	6.83162
Adam15	6.6873	6.95947	6.76844	6.93787	6.89737	6.42821	5.71186	5.59053	5.69243	5.66481	5.55574	5.57903	5.52561	5.45174	5.50159	5.48226	5.54674	5.45627	5.46465	5.53837	5.48963	5.73307	5.60045	5.53339	6.75898	7.48743	7.20141	6.83626	6.94526	6.65487	5.67204	5.65199	5.56859	5.64337	5.58206	5.52494	5.45241	5.51978	5.60553	5.44666	5.52824	5.61734	5.29274	5.29936	5.51281	5.51393	5.53602	5.55831	7.56069
Adam17	9.29822	9.21234	9.1396	9.37739	9.36473	9.40583	9.05869	9.21338	9.01387	9.17272	9.15393	9.21425	8.90729	9.25392	9.32696	9.25201	9.20546	9.48855	9.48863	9.34735	9.55093	9.51163	9.40625	9.49415	9.35924	9.23485	9.25428	8.96702	9.32529	9.22277	9.10754	9.13888	9.40598	9.23491	9.19592	9.51161	9.17075	9.20152	9.3342	9.47669	9.59377	9.6602	9.32007	9.56522	9.63235	9.09801	9.55464	9.21886	9.54567
Adam19	8.08782	7.72054	8.04131	8.00064	7.79649	7.93394	7.56537	7.60533	7.92977	7.87113	7.95423	8.16349	9.14925	9.13726	9.31273	8.91664	9.1771	9.2408	5.76434	5.72318	5.87054	5.59253	5.71354	5.62846	8.7346	8.30061	7.69757	8.58046	8.78382	8.83785	7.25285	7.17063	7.97059	7.94171	8.15106	7.89153	8.41079	8.51358	8.69483	8.69981	8.67226	8.7361	5.49976	5.6382	5.67368	5.44818	5.55195	5.52101	8.03995
Adam1a	6.63494	6.60243	6.09905	6.45755	5.65925	6.86983	5.97806	5.6294	6.38391	5.95489	6.1944	6.05234	5.64218	5.47768	5.66439	5.78812	5.7121	5.72285	5.58908	5.59362	5.51801	6.12753	5.73505	5.48491	6.28277	6.61971	6.87642	6.40705	5.8139	6.11893	5.86934	6.39642	6.07379	6.08042	6.27167	5.94006	5.67865	5.98115	5.86788	5.64438	5.66481	5.6544	5.77499	5.7224	6.03878	5.66424	5.83221	5.51715	6.15062
Adam22	5.44843	5.30595	5.35958	5.23717	5.23936	5.25879	5.91562	5.87868	6.06149	5.58365	5.86038	6.09252	6.68365	6.42823	6.41039	5.95328	5.91748	5.9628	5.39185	5.4644	5.36199	5.56521	5.39345	5.57102	5.53578	5.3647	5.35264	5.38346	5.25831	5.31638	5.62303	5.61342	6.05164	5.52085	5.43574	5.41092	7.73192	8.0386	8.05823	6.59411	6.41612	6.60415	5.23856	5.20738	5.19121	5.3123	5.50513	5.51654	5.37425
Adam23	5.12745	5.00103	5.23636	5.10973	5.17106	5.20667	5.24244	5.32165	5.2953	5.3444	5.31235	5.15918	6.00652	6.15269	6.04135	5.56734	5.70661	5.76601	5.00484	5.1606	4.99576	5.0217	5.00986	5.05901	4.95603	5.13439	5.2333	5.10167	5.15553	5.28395	5.09944	5.20866	5.11262	5.85693	5.74057	5.34285	6.05817	6.29485	6.42688	5.67691	5.63473	6.49561	5.11537	5.09845	5.1197	5.11361	5.18257	4.96428	5.19335
Adam4	7.31762	6.88348	7.20309	6.78175	7.55035	7.06163	7.15849	7.0148	6.72965	7.07544	6.87431	6.90828	6.22013	6.7908	6.42362	7.08216	6.87904	6.7886	6.7445	7.95952	7.56569	7.24729	6.83142	6.89919	7.15864	7.21237	6.70288	7.00577	7.21216	7.14489	6.73887	7.05957	6.60984	7.30199	6.60211	7.10412	6.41167	6.87252	7.30286	6.70134	6.65145	6.83946	7.69876	6.77958	7.13641	7.10904	6.7031	7.12522	7.01575
Adam8	5.07319	5.18894	5.15216	5.02701	5.15446	5.08877	5.46544	5.71906	5.25564	5.31515	5.30541	5.45585	5.09988	4.97621	5.0003	5.09053	5.02395	5.10596	6.44095	6.74329	6.63802	5.62328	5.74574	5.86109	5.0827	5.15578	5.12073	5.08993	5.03312	5.10864	5.09704	5.19836	5.20567	5.19766	5.29736	5.05889	5.07768	4.9649	5.05482	5.03173	4.95791	5.00151	5.08199	5.14445	5.23115	5.45465	5.64538	5.61311	5.02892
Adam9	6.6991	6.36525	6.74632	6.80022	6.30046	6.40173	7.3643	7.08485	7.25872	7.07443	7.17312	7.2384	6.36471	6.30702	6.43946	6.02141	6.18505	6.34201	7.28432	7.22176	7.15857	6.70311	7.97951	7.33793	6.3903	6.27278	6.00498	6.62484	6.89124	6.75698	7.09207	6.86307	7.04694	7.03835	7.44079	6.94098	6.58549	7.05123	6.50626	6.19063	6.58845	6.6069	7.35178	7.38581	7.85799	6.45473	6.43029	6.7087	6.1352
Adamts1	10.0049	9.96633	10.9258	9.87143	8.63245	9.47169	9.26271	8.79476	9.19007	8.16888	8.88262	9.56121	5.8528	5.56952	5.28577	5.55503	5.34242	5.4522	8.46182	8.59888	8.41576	6.6026	7.9913	6.75094	9.40814	9.11245	7.24463	9.249	8.88313	8.97055	8.72265	8.46174	8.23085	7.87011	7.67663	8.35017	5.26392	5.16185	5.70231	5.26155	5.41967	5.19869	6.14425	6.22865	6.37733	8.02557	7.87507	8.38562	8.27251
Adamts10	6.26198	6.23942	6.20013	6.09443	6.18335	6.08833	6.51115	6.53429	6.63949	6.54951	6.77326	6.74292	5.86729	6.13543	5.86028	6.08957	5.87704	5.87736	6.47178	6.505	6.47851	6.64361	6.25697	6.80078	5.98213	6.42571	6.3523	6.39347	6.39592	6.19857	6.82164	6.72811	7.10577	6.60358	6.93167	6.89603	5.76376	5.96941	6.04743	5.89079	6.1313	6.02274	6.45667	6.58969	6.51922	6.61263	6.52823	6.7232	6.61981
Adamts12	5.77257	5.95247	5.92256	5.90105	5.5093	5.57954	6.29022	6.80446	6.80043	7.00175	6.98632	7.69942	5.24869	5.10655	5.12083	5.17166	5.14546	5.0288	5.29316	5.23383	5.30953	5.62801	5.35648	5.20119	5.58124	5.68016	5.74292	5.60535	5.77498	5.83335	6.09016	6.30795	6.60988	6.20416	6.04817	6.31665	5.07691	5.07138	5.15007	5.16951	5.00335	5.15194	5.19053	5.01151	5.00601	5.24427	5.17153	5.32396	5.55602
Adamts16	5.48368	5.61037	5.54447	5.68827	5.73718	5.5186	5.82552	5.80231	5.78774	6.59991	6.60633	6.01292	5.57464	5.48516	5.54218	5.53773	5.30057	5.4217	7.25356	7.11639	7.40512	8.94608	9.2596	8.54685	5.72143	5.59116	5.65436	5.72638	5.84959	5.70724	6.6353	6.27623	6.21277	7.65186	7.06777	7.46639	5.48759	5.47513	5.61319	5.6657	5.55977	5.71901	9.41458	9.67597	9.75993	7.61323	7.43995	7.23603	6.16366
Adamts17	5.9175	5.81278	5.7933	5.62726	6.32591	6.05467	6.45331	6.65979	6.07344	6.52817	6.08437	6.37538	5.75328	5.57792	5.66149	5.87889	5.71926	5.86939	5.87436	5.7794	5.82801	5.73744	5.67566	6.08747	5.53086	5.74547	5.79188	5.84564	5.75496	5.50212	6.61577	7.14341	6.89253	5.99019	5.75637	6.28898	5.78365	5.68426	5.68217	5.72292	5.65813	5.53723	5.67197	5.87751	5.61355	7.63749	9.11538	7.2029	5.81031
Adamts17	6.33509	6.49928	6.35145	6.48503	6.39881	6.27144	7.08789	6.59623	6.76887	6.55019	6.52346	6.86279	6.7867	6.45175	6.53042	6.62257	6.39085	6.5093	7.35724	6.76406	6.46571	6.72685	6.75826	6.75996	6.2715	6.39635	6.57178	6.65766	6.36427	6.40544	6.88583	6.79713	7.88756	6.96526	6.71258	6.63837	6.6449	6.52553	6.70186	6.65461	6.77961	6.86031	6.37058	6.46274	6.62966	6.58571	7.00239	6.7298	6.71609
Adamts17	5.02071	5.01906	5.04181	4.89387	4.96666	5.25852	5.45377	5.09111	5.16544	5.11474	5.2033	5.38494	4.98088	4.98298	5.0128	5.01954	4.82151	5.0571	5.13011	5.09217	5.09239	5.54705	5.11236	5.25056	4.99663	4.88857	5.16525	4.98239	4.94063	4.98726	5.47445	5.55574	5.25738	5.05392	5.06509	5.20414	4.93122	4.98986	4.91065	4.91307	4.92168	4.9885	4.91577	4.92444	4.99542	5.39138	6.15458	5.65806	5.20772
Adamts17	7.19629	7.16605	7.13853	7.11466	6.83332	7.14526	7.32877	7.18144	7.2003	7.16995	7.2009	7.46195	7.16481	7.03438	7.09552	7.08766	6.92593	7.10959	7.61082	7.32977	7.34942	7.30941	7.25415	7.49737	6.94734	7.06497	7.25211	7.22025	7.11357	7.18389	7.22621	7.18302	7.36317	7.2344	7.17653	7.21185	7.03843	7.05296	7.19412	6.98054	6.9928	7.20971	7.10516	6.91915	7.17457	7.37584	7.4181	7.25502	7.13658
Adamts19	5.50829	5.37437	5.43284	5.37084	5.71525	5.4554	5.86051	5.94306	5.70358	5.94907	5.82833	5.63131	5.56872	5.41993	5.41148	5.41638	5.43003	5.48515	5.56232	5.63107	5.47435	6.32807	6.24193	5.93446	5.58881	5.53486	5.61745	5.55217	5.61664	5.38024	8.70039	7.11846	7.95198	6.05531	6.03155	5.90857	5.38699	5.42741	5.82589	5.44703	5.52513	5.51129	5.99565	5.96403	5.7913	8.27277	8.26586	8.9866	5.62864
Adamts2	5.28462	5.3107	5.27587	5.25102	5.27118	5.4528	5.65978	5.69639	5.44533	5.79008	5.77528	5.67001	5.47735	5.19488	5.33428	5.41384	5.25864	5.36204	5.45185	5.39677	5.38087	5.57309	5.71654	5.68024	5.34166	5.30851	5.47629	5.57366	5.6108	5.43038	6.22968	5.74007	6.11706	6.91645	6.79805	6.66133	5.39709	5.34319	5.43855	5.33496	5.33933	5.35891	5.82601	5.81142	5.68262	5.86542	5.58106	5.66081	5.45162
Adamts3	5.00967	4.95666	5.0505	5.10346	4.90126	5.01455	5.52746	6.20909	6.86857	5.41677	5.01381	6.77678	5.0727	5.04359	4.99609	5.31085	5.13833	5.09123	5.30508	5.06033	5.07445	5.2569	5.59731	5.1724	4.94764	5.00506	5.04686	5.28934	4.94606	4.97497	5.32945	5.32606	5.61856	5.68694	5.6735	5.86517	5.18373	5.15009	5.32616	5.10359	5.0358	5.06073	4.97755	6.35457	5.35552	5.26434	5.13488	5.07073	4.9902
Adamts3	5.0237	5.03753	5.01878	4.95341	5.37496	5.15874	6.19393	5.2515	6.53822	5.24746	4.99384	5.23601	5.04997	5.04361	4.9704	5.046	4.94269	5.03063	5.21718	4.98252	4.89681	5.02552	5.05303	4.89459	5.15603	5.32258	5.83836	5.04092	4.90116	5.01859	4.90043	5.07402	5.55331	5.49388	5.29767	6.04091	4.95519	4.95981	5.26179	4.93438	5.05855	4.94265	4.97221	5.09759	5.0485	4.95515	4.9474	4.91396	4.84916
Adamts5	5.48116	5.18443	5.2053	5.25842	5.09803	5.20802	5.33389	5.37825	5.62868	5.45774	5.2245	5.24042	4.77558	4.76554	4.85524	4.85919	4.6407	4.81541	4.73483	4.77428	4.78464	5.3826	4.8126	4.78736	4.80404	5.25872	4.83229	5.17398	5.06109	5.0391	4.88226	5.0998	5.63413	6.14391	6.02951	6.46734	4.79247	4.78021	4.86482	4.81593	4.75012	4.82511	4.89552	4.84349	4.87274	4.71123	4.797	4.821	4.80926
Adamts6	5.58039	5.75735	5.44218	5.62872	4.93294	5.19249	6.15171	5.75362	6.07038	5.61819	5.6899	5.77748	5.27628	4.92806	4.82229	5.11131	5.06181	5.06999	4.95881	5.01775	5.01837	5.10951	4.87605	5.09851	5.5853	5.36212	5.77537	5.46301	5.27355	5.32721	5.31257	5.25942	5.6106	5.4763	5.61572	5.59766	5.07182	4.91413	4.99798	4.87981	4.89571	4.92631	5.25128	5.11311	5.24758	5.08672	4.96981	4.95772	5.46229
Adamts7	5.8987	5.90698	5.67795	5.77472	5.6393	5.67185	5.94792	6.02536	5.9646	6.06258	5.9877	5.88697	6.32414	6.15956	6.28628	6.18867	5.91651	5.98876	5.87892	5.94646	5.85837	5.97692	5.83931	5.7185	5.73244	5.68469	6.03074	6.35709	5.83011	6.17666	5.85559	5.86148	6.19872	6.07634	6.17255	6.2396	6.03571	5.94477	6.03215	5.94163	5.93736	5.90432	5.4981	5.44576	5.61436	5.71014	6.00178	5.80492	6.06123
Adamts9	10.2946	9.43278	9.19204	10.0053	5.45554	7.88908	8.24797	8.52194	7.48341	9.20326	9.41828	9.14347	5.9425	5.60924	5.64982	5.59394	5.51543	5.09429	10.049	9.10396	9.70559	10.9348	10.3388	10.2987	9.85711	8.0733	9.55042	9.03963	9.28068	9.36329	8.69662	8.42678	9.90666	9.50979	10.0628	9.86564	6.2303	5.9436	6.5889	5.51491	5.00964	5.48438	10.9905	11.1289	11.1757	8.3881	8.34402	9.12454	9.47333
Adamts9	8.15004	8.25659	8.22363	8.09726	6.42707	7.75818	8.09371	7.91261	7.67651	8.47705	9.00559	8.33239	5.73887	6.11829	6.0118	6.06911	5.78574	5.9061	9.05492	9.15605	9.12805	8.77641	9.60201	9.78409	7.93259	8.05747	7.414	7.8589	8.22985	8.06138	8.06549	7.71387	8.29591	9.19114	8.83463	8.82835	5.95307	5.95149	6.22297	5.87663	5.78858	5.89971	9.75626	10.269	10.4416	8.23955	8.394	8.16284	8.03883
Adamts9	6.85201	7.26401	6.67626	6.82088	5.8107	7.64819	6.50734	6.44743	6.58593	7.19236	7.29954	7.08558	5.99391	5.99541	5.78431	6.13645	6.10202	5.83177	7.21009	7.76021	7.6373	7.62659	8.25261	8.29176	6.45072	6.84783	6.60045	6.63014	7.06856	6.77205	6.58552	6.80817	7.29694	7.36283	7.39753	7.21283	5.73713	6.00511	5.97681	5.98018	5.72138	5.89806	8.83392	8.12494	8.70485	6.5183	7.03757	6.86126	6.98317
Adamts9	9.75728	9.27958	9.02424	9.23777	6.90654	9.68625	8.26913	8.17654	7.77614	8.6763	8.82133	8.72261	5.93648	6.31273	5.16596	5.3417	5.10468	4.9088	9.19129	8.74225	9.61931	9.50834	9.852	9.84026	9.03821	8.61331	8.62855	8.52232	8.8206	8.74237	8.70764	8.09103	9.33692	9.29171	9.62382	9.3905	6.15306	5.99424	6.80758	5.46439	4.74597	4.64179	10.4955	10.5527	10.7459	7.70369	9.54538	8.67868	8.46201
Adamts9	9.20057	8.91887	9.15257	8.91576	8.47553	8.96266	8.0383	7.62605	7.636	8.5478	8.32978	7.93135	5.29357	5.33914	5.34056	5.47031	5.41079	5.62606	9.42105	9.36284	9.32295	9.73158	9.71459	9.96388	9.05432	8.73513	8.48692	8.60292	8.74671	8.60474	7.94469	7.97795	7.96307	9.08173	8.8281	8.64237	5.23687	5.60659	5.76173	5.08924	5.1083	5.23402	10.4437	10.5493	10.5775	8.53521	8.36706	8.26878	8.69577
Adamts9	9.30111	9.2256	10.0291	8.73678	10.0361	8.31136	8.42019	6.98019	7.87949	9.15955	9.5232	8.3957	4.84769	5.10352	4.89145	4.82132	5.13053	4.70134	10.0958	10.3083	10.2533	10.7974	10.801	11.0593	9.1439	9.34991	9.30361	9.9222	9.32431	9.07122	8.5788	9.09849	10.8445	10.4466	9.31073	9.88097	5.51946	6.16454	5.91524	5.17154	5.12	4.88696	11.0597	11.2612	11.4561	9.60144	9.35545	8.34439	10.0427
Adamts9	7.74914	7.89559	8.08815	7.10259	6.2941	7.60795	6.99915	6.41098	6.90666	7.07588	7.74946	7.19946	6.12869	6.02364	6.02353	6.04993	6.13825	6.1848	8.31445	7.96529	8.2213	7.80415	8.58888	8.99456	7.97697	7.07863	6.15846	7.56493	7.51366	6.85207	6.72336	7.03609	7.71466	8.61836	8.55603	7.68857	6.13486	6.23617	6.39507	6.236	6.10432	6.37577	9.5603	10.3434	10.5086	7.25907	6.8992	7.34413	8.57615
Adar	6.12779	6.11021	5.93077	6.13605	5.95475	6.1912	6.1958	6.09046	5.96021	5.793	5.95727	5.98837	6.49039	6.25782	6.50784	6.30801	6.20328	6.45155	6.26177	6.11701	6.10856	5.87596	5.93137	6.31479	6.10573	6.36773	5.93931	6.1024	6.21115	6.11009	6.12651	6.01585	6.16593	5.74753	5.97475	5.76936	6.31299	7.03941	6.4843	6.29804	6.66631	6.43722	5.661	5.83208	5.53906	6.579	6.81714	6.13672	6.16077
Adarb1	5.99039	6.65617	6.24801	5.97521	5.91847	5.87713	5.51091	5.54059	5.40767	5.44121	5.28517	5.37868	5.76063	5.88982	5.99514	5.60048	5.69891	5.79222	5.37439	5.47206	5.48055	5.47013	5.62321	5.69585	6.23677	6.32256	6.17738	6.17094	6.19529	6.53289	5.54524	5.49169	5.41285	5.44198	5.34864	5.43259	6.49666	6.36885	6.18712	6.04273	5.89227	5.92567	5.7461	5.51719	5.65011	5.57312	5.23887	5.61516	5.92387
Adat1	5.73749	5.8187	5.75978	5.6552	5.99883	5.5732	5.74286	6.01018	5.99866	5.81146	5.72547	5.88121	6.30529	6.78246	6.39505	6.58029	6.13884	6.4185	5.7115	5.70021	5.78771	6.2186	5.83201	5.89314	5.77912	5.64085	5.87345	5.43329	5.5298	5.71452	5.57802	5.76441	5.95591	5.82641	5.90814	5.78804	6.35787	6.83117	6.05478	6.56042	6.74281	6.85066	5.82762	5.68878	5.64208	5.84799	5.90703	5.75332	5.57005
Adat2	9.62166	8.99194	8.6181	9.40207	8.47156	8.68504	7.98775	8.14729	8.26272	8.64775	8.07128	7.3568	8.40241	8.69003	8.83493	8.72147	8.95212	8.7317	7.98131	7.92199	7.89837	7.6935	7.91575	8.14676	8.83979	8.25205	8.24795	8.77564	8.828	8.86704	7.43461	8.00381	7.97332	6.95374	7.98019	7.81358	8.56099	7.7389	8.41972	8.55033	8.33742	8.1835	8.31762	8.20999	8.08894	7.7987	8.45746	8.16303	8.50254
Adck2	5.35573	5.24404	5.33273	5.36785	5.50568	5.30494	5.76009	5.99188	5.7798	5.63414	5.83254	6.11353	5.38668	5.54124	5.20324	5.48119	5.4747	5.26177	6.12033	6.2745	6.57622	5.61387	6.09436	6.11639	5.58525	5.66807	5.35064	5.53984	5.07896	5.37566	5.82517	6.1771	5.93316	5.71731	5.9869	5.65101	5.51512	5.33263	5.53064	5.54724	5.43201	5.5148	5.66924	5.85035	5.7071	6.20574	6.78598	6.36164	5.56516
Adck4	5.81195	5.69762	5.95411	5.90738	6.0733	5.7853	6.3233	5.95291	6.05539	5.99859	5.8794	6.03828	5.99765	5.97402	5.94564	5.96911	6.00435	5.90648	6.98789	6.27834	6.22451	6.06665	6.39096	6.35307	5.95295	6.02385	6.03405	5.64653	5.78348	5.77593	6.15115	6.18736	6.24192	5.88844	5.90176	5.90413	6.00059	6.00278	5.78981	5.86346	5.97823	5.86868	5.86687	5.87366	5.92314	6.35927	6.63624	6.54429	5.99667
Adck5	5.81028	5.74355	5.60154	5.93753	6.24902	5.79543	5.9836	5.97449	5.94144	5.87712	6.14887	5.96144	5.99946	6.17933	6.09631	6.05982	6.24554	6.03451	6.21998	6.1824	6.18289	5.99494	6.03258	6.06127	6.10434	5.90758	6.08516	6.05589	5.84502	5.83204	6.01847	5.92871	6.01014	5.88364	6.03112	5.94478	5.8519	6.07304	5.82348	5.89418	5.76616	5.98462	6.13111	6.46614	6.09575	6.12252	6.44791	6.00489	6.24868
Adcy1	5.72265	5.66294	5.78575	5.60623	5.98623	5.8215	5.66695	5.80505	5.61912	5.82401	5.69134	5.64606	5.85709	5.82282	5.67016	5.67919	5.78132	5.8518	6.23518	6.0998	6.29025	5.81754	5.84181	5.78537	5.67932	5.67366	5.87373	5.81162	5.56583	5.7686	5.60705	5.70615	5.77173	5.80671	5.77128	5.63281	5.92675	5.73305	5.79801	5.84072	5.68883	5.88191	5.98636	5.89009	6.07788	5.85711	5.80324	5.78624	5.7286
Adcy2	5.41353	5.45916	5.10951	5.40822	5.56748	5.56835	6.57277	5.99485	6.69991	6.32065	6.35649	6.70049	5.47295	5.33782	5.48181	5.55223	5.43088	5.46181	5.54828	5.68998	5.71626	5.7516	5.88706	6.02599	5.27681	5.52461	5.64224	5.6485	5.46954	5.46706	6.48573	6.49267	7.23883	6.62135	7.05103	6.19239	5.51552	5.49022	5.62185	5.36476	5.48995	5.35084	5.66643	5.58605	5.82038	6.24331	6.22156	6.19165	5.42524
Adcy3	5.44776	5.57235	5.3937	5.50499	5.36667	5.46256	5.76901	5.78342	5.65463	5.70882	5.96989	5.76545	5.90056	6.05343	6.34098	5.74043	5.98556	5.91951	6.0669	5.61524	5.70733	5.79064	5.84729	5.70804	5.7206	5.59055	5.62224	5.75615	5.50708	5.5366	5.95896	6.02967	6.04863	5.74405	5.72786	5.79104	5.97614	6.56759	6.27447	6.43304	6.44564	6.58743	5.48421	5.61017	5.60597	5.82329	6.09121	6.15829	5.63791
Adcy4	8.7946	8.72346	8.23494	8.60089	7.40955	7.87452	6.1122	5.8298	6.13114	6.01668	5.91383	6.02897	5.78126	5.46309	5.63708	5.64931	5.49459	5.67066	6.10044	6.01215	5.92355	6.03607	5.92003	6.04589	8.72995	8.17303	7.77579	8.13933	7.90948	8.31661	6.17992	5.88643	6.07616	6.09711	5.96136	5.64899	5.71803	5.55531	5.74435	5.81188	5.58505	5.76893	5.70233	5.51084	5.76984	6.01258	6.15432	6.29617	8.56555
Adcy6	6.99288	7.04706	7.26702	6.96041	6.4019	6.7129	6.93696	6.8745	7.06493	6.88519	6.6919	6.96466	6.29643	6.14657	6.12607	6.01146	6.0951	6.06073	6.41182	6.29217	6.42512	6.4236	6.73131	6.49826	7.05098	6.79819	6.96766	6.88478	7.15159	7.39263	7.19525	7.12061	6.88194	6.96649	6.95238	7.0413	6.09779	6.37288	6.18968	6.33356	6.55219	6.65266	5.98981	6.50479	6.06512	7.13857	6.85942	6.95127	7.08079
Adcy7	6.22616	5.90149	6.01675	5.91941	6.09064	5.96091	5.68029	5.64035	5.81473	5.78773	5.71632	5.73129	5.79586	5.74498	5.94526	6.03679	5.78106	5.73774	5.81418	5.78957	5.79007	5.94754	5.85628	5.67237	5.90354	6.26389	6.14318	6.03463	6.09553	5.85087	5.75559	5.5175	5.71975	6.3285	6.2616	6.08194	5.76826	5.75084	5.76584	5.81426	5.89658	5.86744	5.94944	5.84272	5.72831	5.82926	5.91078	5.81011	5.90798
Adcy9	5.90071	5.88687	5.9823	5.93916	6.23008	5.74273	5.77357	5.95546	5.73035	5.96596	5.69234	5.88641	6.00644	5.78314	5.88399	5.8756	5.83248	5.91516	6.01025	5.92584	6.02032	6.52786	6.47718	6.5044	5.81667	6.02338	5.79001	6.08945	6.01696	5.93617	6.00054	5.94465	6.03643	6.32232	5.95728	6.33591	6.13696	6.41987	6.28988	5.9248	5.91196	5.82198	7.11012	7.39612	7.03608	5.80227	6.4284	6.00771	5.79877
Adcyap1r1	5.5046	5.54989	5.49627	5.5355	5.49668	5.3301	5.91994	6.02259	6.51893	6.4724	6.69663	6.46113	5.52141	5.4983	5.59522	5.552	5.47665	5.49137	5.35093	5.55877	5.48981	5.79863	5.50357	5.60849	5.77062	5.63028	5.47022	5.80294	5.6776	5.60385	6.55381	6.0837	5.97491	6.16499	6.39909	6.06978	5.59588	5.75563	5.70141	5.48873	5.43548	5.45737	5.78239	6.04436	5.67328	5.44991	5.59701	5.5727	5.50161
Add1	9.45858	9.3804	9.75445	9.57147	9.17258	9.32342	9.6258	9.7214	9.5841	9.53499	9.78248	10.0976	8.50878	8.01342	8.33189	8.59148	8.21974	8.3267	9.5999	9.66896	9.60091	10.1007	10.0283	10.1206	9.48379	9.52619	9.43483	9.64868	9.62481	9.76448	9.85399	9.6934	10.1184	9.91631	9.85579	9.93463	8.3514	8.06321	8.40791	8.00073	8.19841	8.34828	10.0866	10.2745	10.4384	9.8787	10.0399	9.92746	9.49486
Add3	8.13927	8.01433	8.12745	8.27251	7.31126	7.54992	7.96803	8.04467	8.08875	7.7153	8.09261	8.13101	7.41879	7.24538	7.47029	7.23857	7.29299	7.34575	7.35842	7.50945	7.6588	6.95106	7.71222	7.4597	7.81128	7.76157	7.81929	7.43555	7.61377	7.77089	8.34604	8.11496	8.24889	7.77351	7.82154	7.69312	7.79542	8.21141	7.90186	7.46285	7.48315	7.59359	7.8236	8.2664	7.94503	8.3581	9.08716	8.51165	7.85941
Adh1	7.08661	7.57822	7.60942	7.26704	6.55199	6.84036	8.32951	7.61476	8.27102	8.03379	6.57333	7.91886	6.05599	6.24354	5.76036	5.75802	6.06998	6.16332	7.47686	6.46204	7.01477	9.38889	9.83194	10.2328	6.31303	6.16568	6.39998	9.74	9.64536	10.1292	6.24467	6.38684	6.14084	9.92815	9.4761	8.8112	5.72399	5.68064	5.65608	6.36538	5.85128	6.18075	10.1127	10.4116	10.2368	6.65112	6.18186	6.61283	6.66918
Adh5	10.3196	10.2419	10.0453	10.3675	10.2657	10.1138	10.5102	10.5784	10.7685	10.5661	10.797	10.7568	10.5184	10.6565	10.9313	10.6448	10.9233	10.7633	10.3021	10.5953	10.4152	10.586	10.7699	10.6342	10.0214	10.0432	9.57209	10.4032	10.3668	10.5881	10.4138	10.4519	10.5121	10.5739	10.7347	10.7357	10.5516	10.5374	10.6018	10.767	10.6603	10.7586	11.033	11.2151	11.11	10.3008	10.6032	10.5829	10.0933
Adh6b	8.83428	9.09118	8.92526	9.06732	8.83651	8.87645	5.66272	5.11648	5.74774	5.34262	5.23144	5.58682	5.53378	4.99159	5.17308	5.14852	5.03946	5.1821	5.20474	5.22136	5.02414	5.24127	5.07691	5.10683	6.57457	6.75514	7.39225	6.09325	6.56247	6.93646	4.90728	5.03121	5.17046	5.05021	4.97312	5.16196	5.06557	5.12292	4.97045	5.08691	5.12823	4.96121	5.1849	5.213	5.05719	5.00606	5.03419	4.97547	6.85181
Adhfe1	7.25739	6.8808	6.88105	6.86182	6.99636	7.01375	6.33725	6.2577	6.4914	6.78596	7.02149	6.16388	6.1774	6.16005	5.89759	6.20355	6.10293	6.04898	7.91851	7.04592	7.19094	8.06388	7.85228	8.03066	7.78047	7.76921	7.81177	7.0831	7.21902	7.69789	5.94851	6.56728	6.10026	7.07943	7.26296	6.79932	6.23984	6.42711	6.16687	6.24291	6.17772	6.15294	8.35356	8.76697	8.71801	7.1631	6.64774	7.21817	7.22585
Adi1	8.87007	8.3977	8.6789	9.31999	7.34886	7.89877	9.47281	9.06805	9.27559	9.13989	9.40723	9.41944	9.93612	9.80997	9.57534	10.0178	9.91602	9.82897	9.25087	8.79357	9.11128	9.20148	9.43464	9.05753	8.96272	7.98606	8.0489	9.1116	8.54896	8.40876	9.63716	9.48911	9.20078	9.48106	9.37114	9.48008	9.65207	9.76784	9.80141	9.52061	9.61181	9.47381	9.97494	10.3395	10.2471	8.88252	9.00269	9.11902	8.11869
Adipor1	8.79881	8.67592	8.66401	8.65217	8.65338	8.88986	8.12764	8.83708	8.56768	8.30349	8.55915	8.66823	8.51798	8.79643	8.72033	8.71487	8.70057	8.76545	8.41004	8.42762	8.40696	8.52101	8.58801	8.34648	8.60946	8.67951	8.52631	8.73975	8.69939	8.78998	8.33652	8.57699	8.73286	8.42913	8.40141	8.55078	8.43413	8.56191	8.58748	8.74065	8.58767	8.78462	8.58153	8.82251	8.56368	8.41588	8.45551	8.6261	9.13648
Adipor2	7.11943	7.30298	7.38164	7.31862	7.57491	6.78197	6.99161	7.16384	7.17587	6.92144	7.49481	7.72162	7.82696	7.99211	8.06604	7.99523	8.34758	8.03763	7.28508	7.70984	7.52907	7.71918	8.33636	7.41257	7.3223	7.3905	7.09368	7.44061	7.44552	7.33525	7.47341	7.2332	7.08765	7.02412	7.10119	7.19456	7.76227	8.06483	8.57158	7.87795	8.01966	8.06384	7.68812	7.90223	7.9616	7.80501	7.6112	7.75839	6.81974
Adk	7.48634	7.83463	7.59617	7.61675	8.15576	7.31216	8.86331	8.54279	8.75436	8.8299	9.06488	8.24997	8.66097	9.13914	9.20022	9.01263	9.58497	9.35445	9.9183	9.73881	9.74811	8.3691	8.98462	8.54451	7.25285	7.61488	6.93041	7.32235	7.39615	6.47946	9.39691	9.31196	8.76918	7.73675	7.99636	7.90504	9.07063	8.86231	9.00349	9.02108	9.22953	8.91985	7.98972	7.79862	8.13929	10.2035	9.83646	9.96033	7.29261
Adm	5.64169	5.6676	5.37228	5.70462	5.4909	5.65065	7.58566	7.58445	5.79809	5.68894	6.16265	5.34952	5.40938	5.15908	5.58325	5.18075	5.08777	5.14584	7.97897	8.26489	8.5905	5.33522	5.74617	5.50373	5.77823	5.57968	6.37865	5.47436	5.5081	5.58295	7.27466	7.7444	7.58823	5.21367	5.20974	5.65822	5.08252	5.01285	5.0648	5.32394	5.05596	5.34284	4.95885	5.07137	4.98452	9.05926	8.68563	8.38025	6.06025
Adnp	10.6728	10.5459	10.5397	10.6253	10.251	10.0749	11.1192	11.0118	11.0518	11.0073	10.9062	10.9276	11.0101	10.9954	10.9496	10.7546	10.8208	10.9285	10.6622	10.7046	10.7935	10.9194	10.7742	10.8024	10.4588	10.7083	10.3592	10.3763	10.686	10.5084	10.8499	10.8819	10.9976	10.9384	11.0527	10.9565	11.0179	11.1094	10.9536	10.9662	11.0323	10.9427	10.707	10.6129	10.7096	10.8234	10.986	10.9846	10.2849
Adnp2	7.41422	7.22329	7.48318	7.22418	6.71215	7.38865	7.98753	7.78325	8.11571	7.48427	7.88221	8.29271	8.04276	7.77388	7.81703	7.66752	7.40046	7.93689	7.51174	7.59632	7.65888	7.80082	7.17547	7.78984	7.13891	7.08748	7.38646	7.41197	7.6167	7.18916	7.91363	7.71763	7.24126	7.57522	7.56018	7.76643	7.93511	7.79633	7.85233	7.63273	7.8809	8.09581	7.41817	7.55593	8.23364	7.2894	7.07473	7.65385	7.02715
Ado	6.75259	6.67443	6.18399	6.55749	6.57941	6.6147	6.93589	7.00426	6.9617	7.08836	6.91104	6.85982	7.1832	7.22271	7.17398	7.11614	7.29674	7.0889	6.72153	6.68929	6.16689	6.80978	6.47764	6.64036	6.58276	6.59787	6.66982	6.70474	6.70473	6.57218	6.92071	6.84268	6.92264	6.88166	6.91091	6.8418	7.2019	7.07389	7.17035	7.49891	7.27426	7.25357	6.55669	6.68209	6.73517	6.34039	6.74854	6.59595	6.90834
Adora1	5.12417	5.18855	5.23646	5.27035	5.25446	5.18346	5.15103	5.12802	5.26874	5.23837	5.16906	5.06907	5.16455	5.10196	5.19113	5.1301	5.21334	5.16455	5.53734	5.44128	5.71796	5.54262	5.70578	5.49307	5.06383	5.34206	5.15652	5.22938	5.23603	5.15469	5.3738	5.62002	5.39429	5.59597	5.55406	5.87275	5.25485	5.07362	5.17646	5.30721	5.1067	5.19836	7.68909	7.3821	6.86156	6.04724	5.86794	5.81034	5.18654
Adora2a	6.29423	6.72475	6.51804	6.68525	6.87583	6.3011	5.37577	5.40118	5.5324	5.32797	5.30024	5.48505	5.37795	5.34607	5.2292	5.32751	5.41106	5.48845	5.33231	5.38195	5.46656	5.45101	5.41326	5.48374	6.92229	6.98987	7.47021	6.46476	7.361	7.29707	5.38704	5.47215	5.373	5.43891	5.4452	5.41786	5.40493	5.22683	5.32067	5.35196	5.28939	5.27917	5.29367	5.36091	5.22388	5.35418	5.32738	5.30676	6.81382
Adpgk	6.12072	6.36964	6.52273	6.23268	6.30891	6.50703	6.97897	7.03361	6.43597	6.56574	6.49734	6.91566	7.16619	7.39468	7.7482	7.76078	7.44406	7.50323	7.49619	7.5216	8.02805	6.87999	7.2838	7.43631	6.17412	6.50051	6.1942	6.33349	6.36669	6.48594	7.01903	6.68037	6.63601	6.54959	6.33415	6.71913	7.00861	7.30244	7.37767	7.58871	7.78497	7.73183	6.98653	7.13669	6.92388	7.43268	7.14985	7.83851	6.21121
Adprh	7.58636	7.72696	7.54041	7.42441	7.77405	7.21945	7.56767	7.69531	7.79876	7.74283	7.77293	7.76559	7.67222	7.47531	7.4117	7.38503	7.52688	7.32307	6.9008	6.78519	6.868	6.76929	6.77158	6.78653	7.37289	7.37496	7.38664	7.39954	7.6934	7.59618	7.29634	7.51232	7.62629	7.7585	7.98827	7.7968	7.42665	7.48743	7.4601	7.7052	7.90591	7.57663	6.99899	7.32446	7.27421	7.06098	7.05737	6.8182	7.2592
Adprhl2	6.72229	6.5237	6.6385	6.63829	6.76934	7.079	6.71136	6.62599	6.80663	6.65419	6.6999	6.53471	6.65559	6.71368	6.65161	6.79538	6.73161	6.81439	6.73655	6.82577	6.65105	6.55767	6.66453	6.73483	6.63463	6.64919	6.86696	6.81645	6.53052	6.67892	6.33592	6.56117	6.6092	6.58962	6.55792	6.45325	6.66388	6.51989	6.43804	6.71285	6.58218	6.66898	6.44861	6.49841	6.42423	6.77143	6.90393	6.79765	6.7726
Adra1d	6.61285	6.6575	6.61909	6.69256	6.92696	6.62085	6.7667	6.32998	6.43202	6.53564	6.34302	6.25639	6.38593	6.2858	6.56962	6.49858	6.48153	6.42265	6.59187	6.54346	6.45923	6.69208	6.39141	6.40551	6.52146	6.63224	6.79598	6.80666	6.77934	6.78034	6.56567	6.53246	6.47785	6.84447	6.30105	6.51387	6.51305	6.4333	6.30343	6.40066	6.57721	6.46872	6.32859	6.29708	6.30094	6.56768	6.60262	6.50386	6.55444
Adrb2	6.55161	6.11613	6.45724	6.6419	5.64925	5.73045	5.50572	5.60481	5.32315	5.24757	5.68804	5.54797	5.559	5.39957	5.45015	5.23962	5.12904	5.40443	5.83679	5.99552	6.02846	5.57339	5.46518	5.86582	6.37122	6.20804	5.45536	6.13843	5.74419	5.32635	5.60925	5.3573	5.48351	5.48293	5.50073	5.38297	5.38278	5.5966	5.60723	5.69118	5.61771	5.53872	5.68159	5.72058	5.74027	5.71265	5.58207	5.71828	5.44927
Adrb3	5.24949	5.0998	5.22026	5.1305	5.34672	5.43093	5.04746	5.23313	5.24945	5.31738	5.14067	5.15109	5.93504	5.94122	6.23129	6.26676	6.26134	6.0658	5.16072	5.21026	5.11124	5.20742	5.16882	5.11558	5.19264	5.36915	5.09472	5.21522	5.15208	5.09454	5.23247	5.25332	5.03929	5.18196	5.06212	5.17836	6.09578	5.67018	5.61527	6.20518	5.54375	5.56511	5.33933	5.26237	5.33011	5.18538	5.22059	5.11964	5.31328
Adrbk1	6.73614	6.96358	7.09583	6.89569	7.37083	6.7653	6.07268	6.33323	6.04468	6.03811	6.0141	6.24377	6.37819	6.63912	6.63286	6.40707	6.37045	6.54488	6.07213	6.32832	6.02812	6.17812	5.93869	6.12074	6.71552	6.86772	7.33867	6.39874	6.7213	6.74713	6.38362	6.11824	6.24339	6.13228	6.17628	5.98215	6.34634	6.30887	6.32524	6.36138	6.20445	6.40532	6.20262	6.38289	6.06702	6.15773	5.92102	6.03126	6.42503
Adsl	7.36465	7.52051	7.03526	7.0871	7.11152	7.16851	7.47847	7.34698	7.6034	7.46165	7.57201	7.0686	8.65668	8.62322	8.64593	8.53449	8.53807	8.6092	6.80356	7.25318	6.93777	7.2032	7.46748	7.02612	6.92635	7.05837	7.17535	6.86384	7.26805	7.16682	7.69039	7.39195	7.07175	7.00858	7.25628	7.13988	8.68256	8.79515	8.549	8.48993	8.49225	8.54451	7.17816	7.56383	7.41996	7.08438	7.77991	7.11387	6.77532
Adss	10.6471	10.5088	10.6426	10.5818	10.6465	10.3802	10.0216	10.2716	10.2887	10.1315	10.0776	10.2048	10.7279	10.7501	10.7461	10.7369	10.7071	10.873	9.99597	9.63008	9.96007	9.80374	10.1577	10.1222	10.5142	10.1459	10.4409	10.3197	10.3623	10.3416	10.1895	10.0644	10.2029	9.9719	10.0778	10.1402	10.8451	10.7804	10.9161	10.968	10.9877	11.1172	9.83726	9.82698	9.91006	9.96674	10.1204	10.0663	10.6023
Aebp1	5.76913	5.83314	5.5905	6.09688	5.75045	6.00278	6.93333	7.3341	6.83868	6.7383	7.03677	7.24123	5.62972	5.66398	5.74444	5.80315	5.52393	5.71944	6.52905	6.83683	6.96783	6.676	6.72489	6.52412	6.15895	6.24525	6.17206	7.29052	7.12966	7.04709	7.25283	7.17219	7.40499	7.91369	7.65463	7.86497	5.78858	5.75307	5.80867	5.79968	5.70518	5.63751	7.79283	7.98815	8.17599	6.73419	7.08492	6.80009	6.2393
Aebp2	6.57673	6.4196	6.45109	6.66883	6.80221	6.94209	6.84068	6.83594	6.97309	6.71225	6.72407	6.75633	6.87273	7.18293	6.90572	6.79585	6.86962	7.01799	6.92198	6.82343	6.80052	7.18184	7.08989	6.69035	6.66515	6.91178	6.52882	6.55133	6.4282	6.60675	6.83678	6.75982	6.97605	6.73515	6.56879	6.58312	7.09144	6.63279	6.9639	6.8426	6.71657	6.95946	6.97687	7.30046	6.78582	7.06495	6.79514	6.74029	6.75365
Aen	5.89904	5.95999	5.96659	5.99751	5.92751	5.63544	5.85702	5.81528	5.77346	5.93448	6.001	5.94977	5.962	6.26062	6.43075	6.12864	5.96666	6.41813	5.81216	5.64374	5.76263	5.95059	5.86577	5.93163	5.7946	6.05569	5.87193	5.84039	5.94513	6.01639	5.72021	5.77699	5.86173	5.83014	5.86317	5.86093	6.34078	6.14952	6.14597	6.11414	6.29591	6.05137	5.92374	5.63781	5.9328	5.67369	5.89404	5.66296	5.90457
Aes	6.48254	6.62301	6.67843	6.58472	8.62063	7.08088	7.31155	7.85017	7.34264	8.06457	7.85186	7.18572	7.33683	6.4938	6.48169	6.57425	6.45668	6.7593	7.99235	8.78759	8.25426	8.03865	8.55432	8.17853	7.47214	7.42801	7.76324	7.29409	7.09362	7.30456	8.10568	8.13876	7.41708	7.83716	7.65204	8.01309	6.36332	6.49367	6.39693	6.52604	6.3111	6.38959	8.36749	8.72796	8.19224	8.60059	8.78674	8.33305	7.50367
AF357355	9.28655	9.02155	9.01588	9.08992	5.07463	10.38	9.76104	9.09249	9.18115	9.06366	9.59377	7.16955	7.63191	5.56261	6.51325	4.83168	6.00878	7.49617	8.78847	9.49358	9.62293	9.69658	9.98032	10.2647	9.81145	9.20137	9.66223	9.43589	8.18493	8.71411	8.95384	10.2299	10.2306	10.646	9.99522	10.5838	5.54043	4.74291	5.55402	5.36429	5.15359	5.21487	10.6205	8.55838	9.2309	10.5244	10.2583	9.26081	9.37173
Afap1	5.54497	5.4652	5.42409	5.55946	5.19699	5.41377	5.70564	5.97885	5.80368	5.69456	5.64235	5.79488	5.5967	5.84857	5.68139	5.97138	5.83434	5.84487	5.41111	5.54899	5.43612	5.46101	5.71494	5.603	5.46712	5.56947	5.59189	5.94666	5.84636	5.71015	5.94995	5.92246	5.56026	5.88343	5.84784	6.25752	5.39676	5.44393	5.47051	5.71683	5.49211	5.78863	5.60035	5.12789	5.6096	5.88274	5.55644	5.63875	5.44109
Afap1l1	6.89655	6.53833	6.88466	6.61779	7.53246	6.79678	5.38467	5.38397	5.55636	5.3513	5.42372	5.30839	5.33592	5.26031	5.29679	5.40042	5.20537	5.39656	5.473	5.44022	5.54781	5.32187	5.31049	5.34282	6.65	6.90655	6.95844	6.64636	7.16513	7.31136	5.31804	5.28882	5.27551	5.42826	5.30773	5.33221	5.33724	5.2209	5.39008	5.31872	5.22813	5.4037	5.33842	5.24501	5.19473	5.62528	5.42776	5.53866	7.46742
Afap1l2	5.07694	5.27268	5.10901	5.06451	5.15396	5.21928	5.23485	5.59725	5.2629	5.79634	5.99893	5.52522	5.2721	5.19401	5.19583	5.20986	5.2768	5.31694	5.14134	5.27161	5.19191	6.10642	6.3863	5.38872	5.07904	5.2441	5.14721	5.27545	5.12379	5.12692	5.53605	5.43171	5.64347	5.81791	6.05048	6.15788	5.16123	5.16705	5.28711	5.38265	5.31531	5.24066	7.59193	8.39612	7.63475	5.15208	5.19815	5.10335	5.28548
Aff1	6.6492	6.33712	6.46843	6.46581	5.99921	6.41175	7.97417	7.31268	7.20544	7.66557	7.66784	8.04465	6.0338	5.79173	5.86741	5.92177	6.04184	6.04694	9.31123	9.28345	9.40614	7.89995	8.83226	8.69313	7.1583	6.75111	6.68209	6.7969	6.76198	6.63847	7.03279	7.51494	7.07564	6.96545	6.737	6.98247	5.93637	5.84053	5.95701	6.20257	6.19181	6.18062	8.16812	7.87193	8.63751	8.17435	7.63255	7.84598	6.47029
Aff1	7.91557	7.20896	7.45218	7.75655	6.52695	7.47812	9.39806	9.72383	9.39448	9.6703	9.81745	9.71638	5.3048	5.8368	6.07855	5.63556	5.96139	5.69753	10.7486	10.8584	10.844	9.68396	10.3352	10.595	8.67925	7.40874	7.72074	8.626	7.79909	8.08534	9.34996	9.60667	9.01265	9.15753	8.82667	8.83787	6.0969	5.88752	5.82157	6.62843	6.06696	6.03267	9.52816	9.57686	9.73664	9.55661	9.94583	9.89958	8.21856
Aff2	5.40139	5.4993	5.3637	5.42056	5.86846	5.57485	7.38445	6.69284	7.75184	6.68813	6.50538	7.26251	5.3547	5.29098	5.25007	5.2204	5.55806	5.19563	8.29102	7.99857	8.56637	6.76438	7.17712	7.95872	6.19695	6.1109	5.27474	6.09166	6.24253	6.1532	7.57008	7.53762	6.53876	7.59149	7.36021	7.8856	5.17637	5.2275	5.28813	5.30516	5.19203	5.29877	8.33666	7.85385	8.47443	8.29789	7.68873	8.12352	5.95674
Aff3	6.29642	6.24507	6.26985	6.37391	6.43306	6.78692	8.50041	8.36086	8.111	7.7593	8.14081	8.36346	6.9739	7.23658	6.93577	7.08627	7.08705	7.11167	9.70067	9.58967	9.67394	8.0773	8.87031	9.19444	6.40995	6.52879	6.89855	6.51325	6.0393	6.52753	8.04517	8.36182	8.07234	7.84637	7.73436	8.04684	7.09463	7.19711	6.96614	7.03822	7.17623	7.06859	5.96718	5.86538	6.18812	9.22096	8.55749	8.78163	6.6047
Aff4	10.3553	10.2168	9.97438	10.4925	10.2778	10.2148	10.496	10.3087	10.3765	10.0912	10.1932	10.2279	9.40399	9.56991	9.49565	9.62403	9.43133	9.49128	10.4857	10.3421	10.5601	9.96868	10.4369	10.1516	10.175	10.539	10.0067	10.0643	10.1625	10.205	10.379	10.2053	10.2805	10.1589	10.2194	10.3735	9.62192	9.20682	9.85684	9.47391	9.59469	9.71098	10.5023	10.4596	10.6477	10.5382	10.3675	10.4346	9.61907
Afg3l1	5.97112	6.00114	6.17677	6.26136	6.3668	6.1796	6.29341	6.21592	6.04524	6.28087	6.01934	6.25264	6.13019	6.52232	6.45013	6.45387	6.27042	6.47368	6.22048	6.52889	6.10112	6.2004	6.48349	6.14816	6.03436	6.12098	6.059	6.26907	6.17691	6.30482	6.28531	6.17915	5.99516	6.41253	6.33044	6.05448	6.34053	6.72037	6.50991	6.67136	6.45998	6.63708	6.42428	6.84118	6.45887	6.27808	6.04542	5.98641	5.61004
Afg3l2	7.95041	7.74836	7.86807	7.83156	7.12572	7.39981	8.39182	7.80738	8.22124	8.19636	8.54358	8.63839	8.77173	9.08583	9.27492	8.91932	8.92356	8.94129	7.97248	8.56182	8.50326	8.21282	8.59766	8.74879	7.51962	7.70694	7.8614	7.89856	7.90373	8.05947	8.51308	8.4889	8.55602	8.50273	8.36405	8.41939	9.1042	9.12607	9.056	8.9355	9.09479	9.08181	8.31949	8.82815	8.60982	8.27975	8.14805	8.45375	8.08507
Afmid	5.324	5.37359	5.3583	5.43316	5.31179	5.46892	5.49725	5.3045	5.65701	5.36332	5.53313	5.47096	5.44826	5.41616	5.3212	5.29039	5.27421	5.25202	5.59603	5.60481	5.65206	5.30491	5.51713	5.61148	5.39999	5.56544	5.36707	5.29772	5.42793	5.39807	5.66858	5.39806	5.46057	5.95621	5.23095	5.59753	5.47101	5.40989	5.48122	5.38402	5.34844	5.46532	5.68931	5.55056	5.43843	6.12456	5.47954	5.5164	5.32539
Aftph	9.09876	9.64593	9.0941	9.66621	8.04361	9.04174	9.50777	9.2897	9.42479	8.82589	9.38613	9.82678	10.2164	9.71309	9.79536	9.73203	9.56733	9.67002	9.85421	9.69094	9.64763	10.1646	9.6493	9.61802	9.54739	9.5919	9.59635	9.80848	9.20592	9.40643	9.60362	9.4442	9.39691	10.0063	9.45901	9.62549	10.0407	10.4291	10.2077	9.80004	10.1575	10.2559	9.21758	9.84457	10.101	9.87753	10.1596	9.8055	10.0466
Aga	8.3587	8.64573	8.20423	8.65132	8.18119	8.25969	8.91456	8.51197	9.33825	8.86264	9.17179	8.76935	8.83307	9.10887	9.04428	9.36822	8.89897	8.90848	8.78501	9.4524	9.27874	8.84275	9.04554	9.17041	8.36556	8.15306	7.37691	8.64633	8.49428	8.76086	8.78803	9.24795	8.72552	8.97994	9.24696	9.30588	9.06504	9.15477	9.09137	8.97785	8.85277	8.70764	9.16679	9.33838	9.65286	9.26301	9.65157	9.46926	8.71892
Agap1	7.05369	6.7918	7.07347	6.94091	7.04606	6.51891	7.53057	7.69171	7.31812	7.19611	7.47321	7.97626	7.21623	7.35551	7.20169	7.01815	7.15668	7.19586	7.55942	7.81122	7.59365	7.22103	7.34063	7.29157	7.15868	6.92252	6.81381	7.35764	7.7085	7.32531	7.64773	7.34085	7.42727	8.13379	7.94974	7.72456	7.20996	7.99489	7.73551	7.39278	7.33046	7.42597	7.03933	7.11508	7.9519	7.32949	7.42205	7.25429	6.94877
Agap3	5.9423	6.08307	6.16612	6.0309	6.44586	6.06307	5.92175	6.01939	5.72775	5.73597	5.8668	5.89179	5.93856	5.79023	5.80765	5.90916	5.85676	5.81693	5.82776	5.80083	5.64554	5.72381	6.10536	5.84856	6.2266	6.58529	6.15731	6.40902	6.26646	6.35817	5.40174	5.87396	5.61097	5.60393	5.69736	5.68061	5.86965	5.82989	5.86959	6.08382	5.91046	5.90645	5.752	6.01485	5.58436	5.92655	5.79758	5.7472	5.85013
Agbl5	6.74652	6.66653	6.61266	6.63788	6.7683	6.78443	7.21753	7.10338	7.03297	7.16059	7.05	7.17483	6.91712	7.03704	7.07597	7.16911	7.12363	7.22661	7.24893	6.99265	7.02442	6.99084	7.08523	7.22431	6.83498	6.96656	6.86426	6.97619	6.93777	6.83574	7.44362	7.04979	6.97113	7.29836	7.31578	6.99859	6.99929	7.15549	6.94336	7.06552	7.17575	7.08686	7.33496	7.30677	7.4224	7.36775	7.33646	7.21577	6.85953
Agfg1	10.1647	10.3831	10.541	10.1144	10.106	10.4001	9.8366	9.59752	10.1128	9.683	10.0757	9.93405	10.1929	10.0048	10.138	10.3406	10.125	10.1461	9.49528	9.34026	9.51645	10.3358	9.69003	9.53405	10.0187	10.3186	9.7636	9.96481	10.1575	9.82128	9.83681	9.81751	9.75003	10.0187	9.89047	9.7565	10.0564	10.2702	10.2179	9.97701	9.92341	9.91562	9.36148	9.62142	9.09579	9.91305	9.8469	9.6971	9.97623
Agfg2	5.76708	5.86241	5.65529	5.82144	6.02431	5.96354	5.99145	5.84604	5.87479	5.85272	5.93797	5.58228	6.01187	6.07562	6.12735	5.81734	5.93749	5.94168	6.03926	5.83046	5.92158	6.04853	6.0398	6.02758	5.79351	5.90404	6.06892	5.78456	5.75817	5.8088	5.84595	6.054	6.05177	5.90341	5.94048	5.96292	6.06217	6.21774	5.99246	6.01609	6.13756	6.00014	5.93567	6.02767	6.0715	5.86361	6.00698	5.83398	5.92462
Aggf1	8.58114	8.80112	8.777	8.63345	8.99028	8.71424	8.92663	8.69799	8.77679	8.59999	9.11395	9.37518	9.24168	9.12789	9.18045	9.04641	8.97781	9.21838	8.48753	8.77176	8.51768	7.41672	9.01868	8.8469	8.50966	8.52912	8.07695	8.50664	8.86609	9.10546	8.60142	8.69179	8.94942	8.63571	8.80629	8.44904	9.16943	9.44827	9.32011	9.16229	9.10702	9.38529	8.26861	8.34728	8.64528	8.5833	8.91752	8.66348	8.05966
Agk	6.93715	6.53464	6.7603	6.95276	7.642	6.45775	6.67387	6.66901	6.82774	6.99302	6.71915	7.03786	7.72046	7.84104	7.67841	7.42556	7.74966	7.93151	7.38655	7.04509	6.89842	6.4505	7.12563	7.30797	6.59198	6.45205	6.73364	6.38683	6.94984	6.79471	7.40875	6.60609	6.58309	6.93038	6.80463	6.59148	7.74315	7.3307	7.77924	6.96709	7.48597	7.37911	7.54149	6.92224	7.13165	6.70381	6.91575	6.99549	6.89209
Agl	7.14758	7.38552	7.04398	7.14019	6.81481	7.2501	8.05239	7.8433	7.92395	7.80369	7.6741	8.65367	7.39702	6.99302	7.48984	6.97424	7.13089	6.99383	8.36564	7.80985	7.78449	7.67661	7.7334	8.18945	7.10041	6.96945	7.23814	6.92944	7.50435	7.24896	8.27727	7.79335	7.99557	7.73112	7.88335	8.03648	7.62788	7.82672	7.78274	7.19733	7.35678	7.26648	7.5714	7.64869	7.95587	7.99244	7.60341	8.39209	7.05841
Agpat1	7.1041	7.06641	7.01595	7.32661	7.91973	7.95632	6.5032	7.30486	6.79434	6.68202	6.79588	6.47751	7.20162	7.247	7.4118	7.50753	7.35861	7.28484	6.95124	7.21801	6.97164	7.11613	6.7221	7.05569	7.3729	8.17827	7.23797	7.44724	7.30436	7.11688	6.92414	7.10979	6.58214	6.81102	7.30283	7.11772	6.94614	7.4585	6.9759	7.20634	7.15968	6.80445	7.52774	7.57094	7.57071	7.09792	6.84451	6.54591	7.19798
Agpat2	6.26966	6.48301	6.94272	5.62204	5.19294	5.93776	5.23662	5.3565	5.36282	5.37238	5.15242	5.355	5.181	5.21792	5.10649	5.04107	5.0877	5.02898	5.56777	5.12155	5.54997	5.29721	5.39918	5.64111	5.79231	5.47318	6.15629	5.61903	5.56771	5.92736	5.12541	5.71734	5.35411	5.29445	5.30499	5.26331	5.09588	5.30998	5.10525	5.12269	5.054	5.10809	5.26938	5.05147	5.406	5.326	5.40362	5.42581	6.30259
Agpat3	6.65423	6.92331	6.64444	6.95038	6.38301	6.59409	6.50749	6.68038	6.71341	6.67153	6.14032	6.56384	6.02845	5.7406	5.98678	5.87064	5.94708	5.78659	6.98968	6.79654	6.95139	7.11947	7.1559	6.7479	6.69709	6.79504	6.80494	7.07844	6.76673	6.9771	6.70044	6.47905	6.70927	6.39268	6.74684	6.49316	6.32551	6.53333	6.29963	6.4336	6.24938	6.44054	6.06309	6.36713	6.14606	6.85242	7.21945	6.86523	6.55547
Agpat4	6.05071	6.05405	6.22575	6.22114	5.78727	6.05699	5.39348	5.45291	5.77614	6.15753	5.37558	5.4711	5.58583	5.32733	5.32337	5.61675	5.33103	5.30557	5.96179	5.46618	6.04971	7.7822	7.03548	6.76725	6.41552	6.10877	5.94609	5.91828	6.20336	6.2435	5.37276	5.36884	5.70392	6.22894	6.11742	6.50011	5.29805	5.39166	5.31653	5.50536	5.30546	5.36037	7.99077	8.36241	8.35158	5.36131	5.37889	5.26292	5.84358
Agpat5	7.8866	7.80777	7.94309	7.83464	7.3295	7.75991	7.95459	7.97282	8.11095	8.00399	8.16439	8.09453	7.5273	8.03229	8.27809	7.93501	8.27669	7.90847	7.75639	7.31329	7.66142	7.51957	7.73355	7.70258	7.48696	7.98476	7.74568	7.38432	7.72667	7.58317	7.8569	7.78296	7.83996	7.43072	7.84737	7.85842	8.10275	8.6459	8.5118	8.17241	8.53843	8.26824	7.33638	7.19755	7.57704	7.61536	8.24812	7.6713	6.92407
Agpat6	8.70609	8.64055	8.60455	8.68052	8.61943	8.4919	8.54518	8.59012	8.75435	8.73697	8.76646	9.11111	7.95511	8.05846	8.33612	8.36187	8.04853	8.244	8.27063	8.32447	8.32173	8.2657	8.41378	8.55439	8.56356	8.42982	8.25094	8.82715	8.72223	8.67557	8.4556	8.48949	9.40477	8.17073	8.83991	8.77429	8.02124	8.38916	7.98852	8.15573	8.26633	8.23296	8.01125	8.59801	8.16134	8.19899	8.41447	8.59541	8.34032
Agpat9	5.28978	5.36394	5.3654	5.31996	5.63389	5.58817	5.32877	5.59793	5.45006	5.58252	5.56975	5.39519	5.9664	6.09974	6.24098	5.93561	6.21068	5.87517	5.62216	5.88383	5.93218	5.34472	5.6646	5.74601	5.37513	5.36244	5.42135	5.42473	5.33804	5.37726	5.94178	5.54949	5.66372	5.20607	5.30168	5.42217	5.90318	5.96379	6.22539	5.88689	5.568	5.67282	5.31196	5.30233	5.27451	6.01908	5.99722	5.96026	5.54538
Agphd1	6.38587	5.98785	6.32766	6.03602	5.91578	5.86117	6.16554	5.98027	6.60549	5.91326	5.9407	6.06646	5.8795	5.76603	5.83779	5.98939	5.80468	5.91326	5.88181	6.01143	5.82212	5.82936	5.93819	5.88319	5.88848	6.00571	5.97279	6.06083	6.08345	6.11249	6.32807	6.08249	5.83234	6.24902	6.07471	6.35128	6.01556	5.79248	5.84	5.64644	5.85836	5.84133	5.90816	5.55225	5.978	6.0272	6.28297	6.25518	6.01312
Agps	9.83506	9.80631	9.59742	10.016	10.079	9.86993	10.1086	10.1383	10.4346	9.67903	9.79981	10.35	9.50733	9.89515	9.98931	9.84526	9.86641	9.91744	8.55366	8.85874	8.87865	9.2371	9.34194	9.31576	9.94735	9.71016	9.80179	9.79265	9.74158	9.73289	9.76969	9.6737	10.1275	9.46684	9.56717	9.86832	9.79212	9.86916	10.0158	9.34866	9.41716	9.5786	9.16346	9.5679	9.27351	8.65361	8.60858	8.6758	9.53966
Agrn	7.4584	7.29142	7.507	7.34782	7.02334	7.77741	7.4006	7.56498	7.49311	7.25524	7.43124	7.98474	7.18892	7.25341	7.31527	7.43463	7.03944	7.0142	7.01033	6.96207	6.96707	7.00172	7.13209	7.09571	8.16159	7.86273	8.12041	7.90301	8.0756	7.99586	7.473	7.50599	7.75216	7.57381	7.76532	7.58053	7.18465	7.44106	7.36434	7.05861	7.16205	7.23382	7.15741	7.61229	7.74413	7.40532	7.39702	7.33092	8.08716
Agt	5.37407	5.4419	5.60043	5.37839	5.62131	5.57975	5.49355	5.37394	5.34354	5.41116	5.38524	5.31938	5.52481	5.28961	5.40079	5.43711	5.58978	5.46745	5.39254	5.6415	5.52578	5.89886	5.501	5.4257	5.37982	5.52809	5.57279	5.51126	5.42854	5.46048	5.37792	5.3953	5.43491	5.50493	5.46027	5.34394	5.39439	5.3489	5.30094	5.48615	5.38715	5.49738	5.51933	5.49374	5.48548	5.43954	5.58078	5.48461	5.52301
Agtpbp1	8.38667	8.10278	8.63766	8.47576	7.30518	8.32908	8.24347	8.28626	8.72273	8.06457	8.27119	7.99145	7.22134	7.60372	7.77337	7.21661	7.41157	7.52904	7.65274	7.81307	8.17674	6.18325	7.41375	7.83754	8.53106	8.24004	8.39569	8.24539	8.4338	8.31658	8.25209	8.43201	7.91051	8.09921	7.55324	8.18787	8.18498	8.67054	8.18695	8.29416	8.41904	8.55413	6.88463	7.33143	6.98143	8.30146	8.67283	7.66406	8.45646
Agtr1a	5.04495	5.05606	5.09138	5.12201	5.2987	5.27983	5.11243	5.34135	5.05763	4.97468	5.16428	5.15392	5.31403	5.13838	5.05088	5.07629	5.05935	5.15257	5.27525	5.06746	5.39682	5.51188	5.12514	4.97413	5.10315	5.17266	5.1542	5.21527	5.03546	4.89882	5.6389	5.48851	5.15671	5.10905	5.1074	5.07318	5.05268	5.02172	5.08909	5.16867	5.16859	5.19455	4.9444	4.9822	5.10032	7.31751	6.47166	6.81954	5.23695
Agtr2	5.64703	5.31595	5.26488	5.38586	5.44979	5.97956	8.00146	7.95894	7.19639	8.20249	6.40596	7.05969	5.36148	5.1146	5.34996	5.30457	5.22589	5.3176	5.36264	5.37533	5.2967	5.37737	5.10871	5.07907	5.17382	6.11855	5.472	5.52805	5.6546	5.48769	6.26502	7.98542	6.63544	5.29863	5.48036	6.45349	5.17882	5.14417	6.0237	5.08561	4.92965	5.35072	5.06054	5.19882	5.24135	5.38768	5.58562	5.49668	5.25934
Agtrap	6.4922	6.7174	6.50407	6.59151	6.27956	6.92996	6.48613	6.73001	6.08639	6.52628	6.20803	6.51245	7.80154	7.27132	6.97397	6.9771	7.35171	6.93072	6.3728	6.97544	6.78425	7.47167	6.13652	6.5403	6.49823	6.44342	6.81031	6.29134	6.35238	6.25562	6.25822	6.22961	5.97893	6.24457	6.36495	6.14626	7.2692	6.9985	6.7277	7.03384	6.86696	6.7899	6.53566	6.57776	6.50877	6.60357	7.23461	6.69107	6.29875
Agxt2l2	7.85301	7.71213	7.73199	7.7636	6.91277	7.47675	7.5499	7.4845	7.47256	7.53275	7.4732	7.6183	7.59468	7.684	7.52872	7.58332	7.62451	7.6506	7.62466	7.38013	7.55036	7.73294	7.56947	7.61025	7.59969	7.62315	7.37887	7.82015	7.8703	7.83088	7.56513	7.74794	7.38296	7.54889	7.80473	7.78524	7.63637	7.76	7.78581	7.60947	7.61368	7.56688	7.76615	7.50611	7.31347	7.68646	7.78709	7.56208	7.72813
Ahctf1	9.81303	9.64527	9.57559	9.78904	9.19693	9.62148	9.82541	9.72729	9.76091	9.60021	9.72169	10.0248	10.3995	10.3264	10.2304	10.2201	10.174	10.2539	9.81287	9.72509	9.7386	9.92191	9.82322	9.83364	9.60711	9.59072	9.04623	9.55709	9.67254	9.64268	9.94999	9.65225	9.7394	9.84372	9.75548	9.78936	10.3859	10.4007	10.6015	10.3565	10.3325	10.4425	9.58337	9.6649	9.76558	9.629	9.75949	9.46367	9.27331
Ahcyl1	10.0523	10.1691	9.81043	9.85549	8.60782	9.47696	10.3032	10.3004	10.4706	10.1335	10.5844	10.9447	10.2459	10.0844	10.4587	9.939	9.86609	10.1574	9.7364	9.53641	9.83748	9.82863	10.279	10.2728	9.78464	9.75443	9.50886	9.73102	9.98881	10.0297	10.2659	10.0233	10.6394	10.5576	10.4205	10.4772	10.3611	10.659	10.642	10.1643	10.2254	10.4288	9.9162	10.3615	10.199	9.36507	9.97053	9.87014	9.81828
Ahcyl2	8.26343	7.81645	7.64711	8.00305	8.1879	8.22884	8.77368	8.17762	8.59673	8.38959	8.34249	8.6108	8.38341	7.97504	7.9966	7.38755	8.26635	8.07748	8.44997	9.0437	9.01277	8.76974	9.38687	9.34323	7.72587	8.02509	8.37879	8.48675	7.636	7.95756	8.83962	8.43864	8.31573	9.08797	8.5761	8.48639	8.6943	8.2408	7.92545	8.05998	7.77052	8.10991	8.92729	9.40719	9.45078	8.35185	8.82451	9.01901	8.3686
Ahdc1	6.38617	6.40165	6.15602	6.45506	6.45923	6.51214	6.8695	7.04372	6.88703	7.05032	6.81267	6.86842	6.70199	6.90461	6.89036	6.94425	6.743	6.96343	7.46825	7.41285	7.3336	7.09662	7.15596	7.344	6.52959	6.61822	6.54808	6.44051	6.64396	6.51807	7.11708	6.95105	7.09998	6.9537	6.72524	6.7685	6.57514	6.73185	6.69239	6.79507	6.80494	7.01987	6.77715	6.81877	6.67714	7.20329	6.72341	7.0029	6.34961
Ahi1	6.43998	6.03614	6.03416	5.87366	5.90577	6.23101	6.82752	6.69589	6.51586	6.25848	6.70345	7.10887	6.9899	7.09633	7.36659	7.64562	7.62132	7.47268	5.93251	6.37895	6.02271	5.94976	6.34054	6.55839	6.48464	6.01321	5.80582	5.81242	5.9877	6.2473	6.52123	6.26237	6.54509	6.89146	6.24491	6.90341	6.88072	7.11583	6.9298	7.11896	7.40781	7.03686	6.60995	6.33127	6.80026	6.0863	6.25901	6.09627	5.32926
Ahnak	7.96467	7.44505	7.53003	7.70483	7.40862	7.03354	7.9199	7.91537	7.4407	7.3503	7.45364	7.55362	6.65319	6.55566	6.57362	6.52636	6.40204	6.56351	8.94677	8.67742	8.69658	7.58938	7.52716	7.94361	7.96681	7.94342	8.00014	7.8687	8.03972	7.97326	8.04566	8.3057	8.1633	7.8801	7.46407	7.55756	6.77095	6.5113	6.76858	6.70957	6.53081	6.6018	7.00967	7.23746	7.1455	8.66773	8.74798	8.81598	7.71491
Ahnak2	5.5926	5.70038	5.54394	5.64261	5.61285	5.96378	5.56936	5.5365	5.57168	5.40016	5.2618	5.40961	5.39734	5.42513	5.55219	5.59812	5.41579	5.39971	5.63077	5.57906	5.86613	5.77688	5.39725	5.42456	5.54584	5.79329	5.72159	5.7199	5.43659	5.54828	5.43377	5.44939	5.57191	5.54826	5.20699	5.39731	5.57517	5.38515	5.36692	5.54743	5.44347	5.55105	5.38753	5.51396	5.32718	6.05459	5.77719	6.06334	5.73345
Ahr	7.67778	7.51554	7.63183	7.52183	6.42457	6.94726	5.70993	5.76212	5.85087	5.61079	5.43153	5.67937	6.0229	6.13271	6.28767	6.29273	6.44393	6.26779	5.50696	5.55511	5.36792	5.79975	5.86342	5.81907	7.69203	7.4032	7.13953	6.8481	7.23231	7.12757	5.51434	5.77045	5.82942	6.00739	6.22728	6.02779	6.49728	6.55414	6.4175	6.06658	6.14267	6.19757	5.95738	5.75916	5.87534	5.40663	5.36229	5.73284	7.44611
Ahsa1	10.1906	10.0047	10.1378	10.0355	10.3162	9.90828	10.2154	10.3796	10.3455	10.4927	10.6203	10.2503	10.8906	10.8317	11.088	10.8837	10.823	10.9838	10.354	10.35	10.2776	10.6357	10.3945	10.4081	10.1991	9.55241	9.53474	10.3765	10.0247	10.1643	10.5637	10.457	10.4435	10.4869	10.2924	10.4934	10.9168	10.8476	10.7627	11.1497	11.1308	11.2111	10.3887	10.7939	10.5648	10.512	10.5891	10.4129	10.2612
Ahsa2	10.4437	10.2382	10.1356	10.4524	9.36888	10.2389	10.679	10.2901	10.4948	10.4034	10.5947	10.7439	10.8483	10.8206	10.8082	10.7916	10.6871	10.8792	10.7775	10.7576	10.8	10.6453	10.7272	10.7594	10.4274	10.653	10.2501	10.4733	10.4642	10.2872	10.7032	10.4725	10.7378	10.731	10.5215	10.8016	11.0725	11.0295	11.2468	11.0226	11.1104	11.2023	10.4767	10.4662	10.6937	10.7268	10.6438	10.797	9.96813
Ahsa2	9.99511	10.0494	10.0511	10.0226	9.81124	9.89231	10.2827	10.4679	10.5907	10.4122	10.1103	10.3596	10.2092	10.2604	10.2432	9.94481	10.1189	10.1138	10.287	10.3308	10.0923	9.76825	10.2015	10.2325	9.80177	9.34961	9.94413	10.1998	10.1926	10.3811	10.3547	10.2873	10.3923	10.3352	10.333	10.3311	10.2446	10.4878	10.5192	10.3742	10.066	10.4142	9.9232	10.1305	10.2473	10.1662	10.525	10.3467	9.95305
AI314180	9.76077	9.60761	9.77255	9.79712	9.31995	9.65887	9.84491	9.57609	9.65406	9.58407	9.75493	9.86327	9.5608	9.45755	9.53074	9.24863	9.2522	9.5	10.097	10.3671	10.1698	10.057	10.2825	10.2109	9.80094	9.93627	9.44447	9.65265	9.80791	9.8182	9.78926	9.77917	9.7799	9.66948	9.6656	9.82678	10.0275	10.3536	10.3021	9.68441	9.74172	9.83926	9.90594	10.0467	9.99094	9.94181	10.1073	10.0945	9.33456
AI314831	5.43996	5.75529	5.90642	5.82037	5.43913	5.69378	10.7429	11.5398	10.6969	10.6844	10.4962	11.0042	5.72374	5.78505	5.69361	5.55938	5.17983	5.82788	11.411	11.6781	11.5387	11.6018	11.387	11.6331	6.32058	8.16562	8.64681	5.68096	5.92954	6.38071	11.3247	11.1663	11.267	9.9743	9.51547	9.40477	5.74109	6.01313	6.38681	5.46399	5.64641	5.48873	10.0182	9.04527	9.38248	11.6764	11.1526	11.1027	8.62451
AI314976	9.51526	9.39267	9.30636	9.43527	9.09938	9.23765	9.4939	9.75095	10.124	9.98404	9.49988	9.69699	10.6573	10.7508	10.6588	10.7539	10.7009	10.8852	9.13355	9.6637	9.5461	9.21907	9.20173	9.2318	9.33345	8.95983	9.20662	9.3375	9.21434	9.28015	9.3581	9.65534	9.26415	9.54944	9.93493	9.69192	10.318	10.2446	10.0756	10.727	10.6728	10.875	9.09122	9.28815	8.9328	9.05178	9.36184	9.09158	9.02388
AI316807	8.613	8.91888	8.30142	8.67783	7.63888	8.42239	8.51272	8.73735	8.52005	8.79398	8.55808	8.64266	8.19256	7.51179	8.35658	8.05209	7.51687	7.92139	8.84004	9.09815	8.73092	8.05271	8.85652	8.94858	8.64325	8.26376	8.1783	8.67997	8.75137	8.65327	8.8384	8.79511	8.72487	8.77788	8.89514	8.30504	8.01476	7.97456	8.26024	7.9249	7.7452	7.82336	8.70565	8.7862	9.05172	8.74316	9.80283	9.40776	9.18538
AI413582	5.99433	5.8361	5.95419	5.96403	6.08555	5.94694	5.85568	5.7918	5.95723	5.97067	5.70076	5.78534	6.03647	5.83192	5.97503	5.99788	6.16767	6.04789	5.81387	5.80429	5.8762	5.99127	5.84542	5.78371	5.97798	5.91103	6.07033	6.09386	5.87071	5.8399	5.99518	5.7622	6.0501	5.91351	5.79437	6.06424	5.86873	5.86127	5.8539	5.98374	5.92665	5.96173	5.88039	5.70303	5.66144	5.85418	5.99626	5.92129	6.3969
AI427809	5.29262	5.41307	5.59218	5.50566	5.66179	5.47131	5.41738	5.72963	5.53435	5.66953	5.56595	5.72535	5.71822	5.66741	5.4936	5.62924	5.5643	5.58564	5.63249	5.51041	5.69824	5.42406	5.5127	5.64913	5.49043	5.56045	5.42806	5.78256	6.20286	6.15703	5.88443	5.83316	6.14148	6.53655	6.75138	6.05684	5.47615	5.55665	5.49824	5.57099	5.52205	5.47468	5.86569	5.94469	5.54702	5.92206	5.99794	5.93631	5.7366
AI428936	5.90213	5.88801	5.93503	5.96795	6.16121	5.92144	6.02343	6.09257	5.83337	5.91139	5.87306	5.83034	6.01331	6.16419	6.24937	6.28701	6.07016	6.22275	6.31542	6.19418	6.16055	6.07034	6.08042	6.10672	5.71219	6.08794	6.05718	5.9402	5.84172	5.78863	6.15324	6.07225	5.91744	5.85345	5.86377	5.93459	6.31619	6.19062	6.49647	6.20392	6.32681	6.46956	5.9072	5.88703	5.73563	6.21979	6.38661	6.42167	5.99494
AI452195	7.58786	7.66508	6.74013	7.50055	7.56622	6.94158	6.86753	6.84114	6.69564	6.22306	5.98397	6.97828	5.99505	5.5605	5.66327	5.68903	5.65727	5.75988	5.42309	5.49038	5.7498	6.56712	5.79662	6.21419	8.0022	7.88801	7.92696	6.89042	7.26664	7.61396	6.36253	6.08174	6.8501	6.41882	6.48356	7.16528	5.63606	5.58856	6.15543	5.43269	5.77693	5.79067	5.65443	5.88301	5.73401	5.72002	5.87587	5.5914	6.75237
AI462493	9.09709	8.80182	8.87952	8.59998	9.85787	8.24206	8.291	8.45091	8.46264	8.41615	7.51839	7.62028	7.95825	8.04871	8.08187	8.30783	8.34359	8.10306	8.98966	9.22372	9.01239	7.67051	7.9981	8.18858	8.62391	8.04363	8.72132	8.27499	8.39036	8.53349	7.44019	8.22903	7.38197	7.84418	7.64919	7.62246	7.94174	7.80416	8.06092	8.50173	8.07476	7.85847	8.62454	8.56626	8.39755	8.8385	8.67132	8.79957	8.9526
AI481877	4.9901	5.00124	5.06569	4.845	5.16963	5.06308	4.93454	4.99291	4.88116	4.86515	4.99704	4.96125	5.63546	5.27401	5.23296	5.22492	5.46075	5.32265	4.94485	5.06284	5.06006	5.03067	4.90621	4.87283	5.11049	5.12345	5.04081	5.10003	4.97128	5.01355	4.82072	4.92115	4.98413	4.93311	4.91292	4.94483	5.82324	5.48354	5.47237	5.45195	5.88633	5.34345	4.95171	4.93636	4.9675	4.98759	5.00493	4.90191	5.06948
AI504432	6.02545	5.9719	6.15756	6.53342	5.1665	5.71061	5.72496	5.36834	6.18748	5.17255	5.70698	5.2273	4.90178	4.90604	4.97336	4.90061	5.06192	4.97991	4.87549	4.91818	5.07043	4.96719	4.96378	4.99433	5.98427	6.18816	8.01211	6.01632	5.57291	5.63393	4.93725	5.10895	5.00819	4.97039	5.16347	5.37238	4.89097	5.07525	5.03195	5.03662	4.83483	5.07088	5.11103	5.25811	4.9701	4.92578	4.93618	4.82116	5.62016
AI597468	7.8964	8.05184	7.61032	7.94881	7.15124	7.68773	8.33408	8.02629	8.23753	8.27943	8.33465	8.40922	7.27774	7.57201	7.37002	6.90454	7.05438	7.20974	7.23803	7.81903	7.74096	7.60292	7.71173	7.61087	7.76734	7.86729	7.87667	8.21063	8.06579	8.08841	8.38153	8.29778	8.27724	8.61525	8.61046	8.58651	7.30535	7.20219	7.7351	7.29511	7.27951	7.29555	8.00621	8.06047	8.00648	7.1939	7.37298	7.78247	7.52595
AI597479	6.69508	7.26696	7.21219	7.14558	6.66517	7.02979	7.34597	7.44691	7.47145	7.52831	7.52067	7.65256	7.09624	7.4244	7.37689	7.55974	7.55803	7.61356	7.45627	7.48845	7.70136	6.91528	7.35521	7.29273	7.05002	6.99497	7.11539	6.71194	6.7353	7.04366	7.49821	7.90583	7.38661	7.50423	7.65942	7.56604	7.40454	7.3978	7.39497	7.1898	7.48581	7.31069	7.27876	7.29224	6.88873	7.73292	7.4833	7.68635	7.50307
AI606181	6.11999	5.8924	5.8165	5.95386	5.38287	5.73933	6.4359	5.88646	6.5268	5.89918	6.08458	6.08079	5.98082	5.90755	6.06321	6.18659	6.29203	6.16258	5.80678	5.51707	5.31914	5.74165	6.07486	5.70592	6.40319	6.17915	5.8694	6.33638	6.179	5.99053	5.86657	6.05332	6.39585	6.17684	5.73262	6.24031	6.1471	6.47837	6.15397	5.82304	5.82152	5.80452	5.78857	6.27232	6.53082	6.02946	6.19538	5.73006	6.00468
AI607873	7.44291	7.21963	6.76262	7.2961	5.93284	7.51096	5.36969	5.09076	5.05168	5.05706	5.24264	5.09948	5.03794	4.87897	5.06868	4.93924	4.9852	4.80619	5.34826	5.04659	5.08563	5.3	5.08286	5.16323	6.34558	6.66793	6.11115	6.4671	5.66546	5.44114	5.15611	5.25827	5.08956	5.0087	5.76118	5.01525	5.04423	4.93164	5.02159	5.03987	5.11714	5.10354	5.09068	5.08509	5.16579	5.08936	5.08143	5.10601	6.21924
AI747699	6.27727	6.73449	5.86012	6.72432	5.96609	5.84324	7.29735	6.50005	7.07383	6.95305	6.45265	7.6956	7.29524	7.17223	7.03117	7.64439	7.37442	6.71191	7.39274	6.97869	6.33339	6.21127	7.00192	7.72521	5.26654	6.09369	7.11754	6.66495	6.3085	5.97533	6.73468	7.05369	7.60743	7.2991	7.22698	7.90013	6.78935	6.93153	7.11871	6.93499	6.56674	6.79186	6.61615	6.04857	7.24468	7.10305	6.29719	7.77895	6.75288
AI837181	6.42004	6.64844	6.54216	6.42448	6.32487	5.87791	6.375	6.76247	6.70697	6.90544	6.27294	6.60259	6.17089	6.26769	6.41268	6.3766	6.12342	6.4216	6.1744	6.04573	6.08561	6.08457	6.4939	6.50678	6.26005	6.49549	6.6665	5.99348	6.53245	6.33492	6.64011	7.15271	6.32814	6.18329	6.81744	6.14598	6.39642	6.07172	6.04132	6.38196	6.67048	5.90184	6.94983	6.18481	7.31719	6.43097	6.46438	6.59049	6.62248
AI846148	6.22064	6.40199	6.37913	6.20321	6.42369	6.50477	6.09366	6.06471	6.32591	6.13192	6.0851	6.15069	6.21876	6.47297	6.49025	6.78481	6.44451	6.24753	5.75083	6.16609	5.75208	5.93704	6.18885	6.64792	6.51952	6.4482	6.82667	6.46734	6.49134	6.25132	6.2234	5.92919	6.05319	6.16629	6.30611	6.28185	6.35382	6.16917	6.54356	6.28678	6.39352	6.49059	6.06349	6.28085	6.08921	5.97339	6.27978	6.03733	6.61738
AI848100	8.69111	8.83302	8.79034	8.91763	9.38035	9.32234	9.0457	8.85667	9.07154	9.12044	8.95151	9.05311	9.18965	8.99543	8.96053	8.98428	9.11722	9.11396	9.20404	9.38818	9.11532	9.22684	9.67014	9.7243	8.88368	9.41552	9.28484	8.97818	8.84667	8.89073	8.97695	9.00764	8.96261	8.99335	9.15594	9.01511	9.14833	9.19691	9.0254	8.99572	8.90801	8.91073	9.63544	9.32408	9.53124	8.91565	8.95647	8.68594	8.95994
AI987944	6.00606	5.94911	5.73685	5.92865	6.05109	6.61765	5.51042	5.58074	5.81127	6.03241	5.66483	5.2434	5.62255	5.78043	5.58777	5.41293	5.99544	5.61649	6.07522	5.85701	5.82981	5.8716	5.86804	5.88133	5.93845	5.77827	5.65812	5.90601	5.73501	5.74089	6.03154	5.89966	6.07849	5.77233	5.49729	5.49242	6.11008	5.66867	5.67764	6.20508	5.91252	5.76478	6.06111	6.26277	5.61912	6.12725	5.59139	6.5576	5.73482
Aida	10.0284	9.87414	9.81912	9.98329	9.8105	9.57133	9.25016	9.08064	9.20425	9.22733	9.30806	9.09172	8.64196	8.59375	8.67847	8.96228	8.556	8.78774	8.77746	8.61975	8.86842	8.24956	8.35714	8.79757	9.5335	9.74604	9.69695	9.31724	9.70119	9.92284	9.08335	9.13582	8.89966	8.45043	8.98139	8.92188	8.95589	8.77184	8.86593	8.88733	8.95968	8.74321	8.45528	8.74579	8.59844	9.32793	8.98412	9.48319	9.7288
Aif1	9.29535	8.99754	8.5102	9.16892	5.548	7.53558	5.032	5.4311	5.60286	5.2673	5.30466	5.12392	4.80803	5.07627	4.94247	4.87036	4.68746	4.84678	5.0762	5.155	5.08565	4.76685	5.13328	4.74712	8.78493	7.4619	6.08166	6.72924	7.77633	5.65476	5.39582	5.22245	5.0008	4.91958	5.49078	5.05909	5.01156	4.75781	4.83128	4.80453	4.72254	4.78998	4.98724	5.03155	5.0212	4.98745	4.67183	5.20287	6.54761
Aif1l	6.78057	6.84035	6.35918	6.81403	8.12399	7.39181	7.25158	7.06045	7.37699	6.92762	7.51002	7.24556	8.29352	8.35033	8.37915	8.05749	8.16947	8.11872	6.23206	6.11954	5.98448	6.42433	6.48096	6.36209	6.96149	6.93297	7.01511	6.94698	7.06044	7.16026	6.35472	6.70017	6.8505	6.51442	7.12883	6.73302	8.10732	8.5263	7.69994	7.16956	7.06065	7.47755	6.20063	6.20616	6.55178	6.15881	6.12484	6.28429	7.47456
Aifm1	9.37398	9.32703	9.40798	9.38346	7.53361	9.00577	9.41484	9.58608	9.60653	9.52507	9.86821	9.75373	10.3419	10.5574	10.5878	10.3871	10.3751	10.4643	9.31559	9.43246	9.69672	9.14328	9.9855	9.86368	9.37058	8.5728	8.5276	9.3033	9.52469	9.79469	9.59336	9.59383	10.1717	9.86479	9.95173	9.91537	10.7357	10.8413	10.9439	10.488	10.3326	10.7114	9.79207	10.1181	10.0533	9.56838	9.3049	9.68417	8.96596
Aig1	6.10213	6.29613	5.8026	6.3138	5.94685	5.73491	5.74121	5.53093	6.03834	5.88525	5.52339	5.60942	5.69367	5.75138	5.78782	5.73384	6.04623	6.04258	6.35983	6.03408	5.78337	5.84323	6.09109	5.88452	6.00206	6.0036	6.02166	5.99066	5.73595	5.81029	5.63076	5.8441	5.85352	5.48926	5.40629	5.66911	5.79068	5.52766	5.62678	5.72119	5.70964	5.54693	5.72223	5.89426	5.68318	5.72237	5.32264	5.85027	5.82661
Aim1	6.34193	6.33403	6.19595	6.21649	6.49427	6.27134	6.32073	6.31954	6.15602	6.27924	6.28266	6.17005	6.4839	6.33302	6.40536	6.34766	6.35826	6.39601	6.52247	6.26522	6.45838	6.37521	6.19487	6.16018	6.27518	6.5707	6.43709	6.20601	6.3395	6.34214	6.21996	6.20761	6.37831	6.28595	6.28824	6.24207	6.44967	6.32447	6.33355	6.37326	6.39192	6.39389	6.26785	6.33113	6.17694	6.24989	6.43582	6.39243	6.47472
[truncated: 11,845 more rows]
[truncated: 25 more columns]

## Sheet: (B) Graphs
Gene Symbol	11FlkF1	11FlkF2	11FlkF3	11FlkM1	11FlkM2	11FlkM3	11MafF1	11MafF2	11MafF3	11MafM1	11MafM2	11MafM3	11OctF1	11OctF2	11OctF3	11OctM1	11OctM2	11OctM3	11SryF1	11SryF2	11SryF3	11SryM1	11SryM2	11SryM3	12FlkF1	12FlkF2	12FlkF3	12FlkM1	12FlkM2	12FlkM3	12MafF1	12MafF2	12MafF3	12MafM1	12MafM2	12MafM3	12OctF1	12OctF2	12OctF3	12OctM1	12OctM2	12OctM3	12SryM1	12SryM2	12SryM3	12SryF1	12SryF2	12SryF3	13FlkF1
[truncated: 6 more rows]
[truncated: 25 more columns]
