# Supplementary material for: Temporal Transcriptional Profiling of Somatic and Germ Cells Reveals Biased Lineage Priming of Sexual Fate in the Fetal Mouse Gonad
Source: PLoS Genet. 2012 Mar 15;8(3):e1002575. doi: 10.1371/journal.pgen.1002575 (PMC3305395; doi:10.1371/journal.pgen.1002575)
Supplement: Dataset S2 — Lineage-specific gene lists, permutation tests, pathway enrichment, and GO term enrichment. (A) Gene lists generated by multiple pairwise comparisons, graphically illustrated in Figure 3A. The lists are arranged in order of lineage, stage, enrichment or depletion, and sex. Genes are in alphabetical order. (B) Results of permutation tests for all the gene lists displayed in Figure 3A. Separate entries are listed for the median and mean number of transcript clusters and individual genes found in the permutation tests. The number of genes in the actual list and the percentage of false positives based on the mean number of genes are also provided. (C) The lists of KEGG and BioCarta pathways enriched with a p-value<0.05 in each list with a false discovery rate <20%. (D) The list of biological process (“BP”) and molecular function (“MF”) GO terms enriched with a p-value<0.05 in each significant list. In both cases, the lists are arranged in order of lineage, stage, sex, and enrichment or depletion. The terms in the list are ranked from lowest to highest p-value. (XLSX) [file pgen.1002575.s002.xlsx]

## Sheet: (A) Gene lists
E11.5 supporting cell enriched
♂+♀		♂		♀
Transcript cluster ID	Gene name	Transcript cluster ID	Gene name	Transcript cluster ID	Gene name
10394082	1110031I02Rik	10397230	2900006K08Rik	10437928	0610037P05Rik
10375322	4933415A04Rik	10405263	4732471D19Rik	10481272	1700007K13Rik
10397148	Acot1	10487748	4930402H24Rik	10516277	1700029G01Rik
10386652	Aldh3a2	10586130	Aagab	10591749	1810064F22Rik
10464560	Aldh3b1	10424082	Aard	10437970	2310008H04Rik
10534120	Asl	10519527	Abcb1a	10497481	2810416G20Rik
10398885	AW555464	10501832	Abcd3	10542885	2810474O19Rik
10559177	B130016D09Rik	10474181	Abtb2	10565567	4632427E13Rik
10583847	Bbs9	10556769	Acsm3	10447079	4921513D11Rik
10590791	Birc2	10410477	Adamts16	10587655	4930422I07Rik
10604226	C1galt1c1	10546450	Adamts9	10525487	4932422M17Rik
10558948	Cd151	10496438	Adh1	10433735	Abcc1
10451004	Cd2ap	10441740	Agpat4	10371830	Actr6
10470775	Cercam	10537146	Akr1b8	10568873	Adam8
10503947	Cga	10524588	Ankrd13a	10413086	Adk
10438530	Clcn2	10545958	Anxa4	10523647	Aff1
10574410	Cnot1	10430113	Arhgap39	10354111	Aff3
10580905	Cnot1	10360270	Atp1a2	10461369	Ahnak
10537014	Cpa2	10387505	Atp1b2	10504606	Aldh1b1
10578904	Cpe	10392685	BC006965	10427222	Amhr2
10460468	Ctsf	10606835	Bex2	10450038	Angptl4
10365297	D10Wsu102e	10443421	Brpf3	10353064	Arfgef1
10405693	Dapk1	10417628	Cadps	10572960	Arhgap10
10505911	Dmrta1	10533529	Camkk2	10543067	Asns
10345241	Dst	10490097	Cbln4	10600180	Atp2b3
10559179	E330027M22Rik	10458828	Cdo1	10592420	AW551984
10447065	Fam82a1	10460221	Chka	10506452	AY512949
10524941	Fbxo21	10365290	Chst11	10491520	B230207O21Rik
10438017	Fgd4	10409345	Cltb	10489891	B4galt5
10508412	Fndc5	10530503	Cnga1	10557992	Bag3
10504534	Frmpd1	10513061	Ctnnal1	10587085	BC031353
10577164	Gas6	10484402	Ctnnd1	10549276	Bhlhe41
10363241	Gcc2	10545771	Cyp26b1	10476395	Bmp2
10389590	Gdpd1	10422249	Dct	10579532	Bst2
10376208	Gm2a	10369290	Ddit4	10418355	Cacna1d
10597918	Gm9856	10420155	Dhrs1	10469404	Cacnb2
10574259	Gpr56	10518069	Efhd2	10518835	Camta1
10560945	Grik5	10537657	Ephb6	10515026	Cc2d1b
10394778	Hpcal1	10548905	Eps8	10496605	Ccbl2
10345442	Hs6st1	10413897	Ercc6	10515894	Ccdc30
10505200	Hsdl2	10349932	Etnk2	10352194	Cdc42bpa
10355214	Idh1	10399632	F630048H11Rik	10423230	Cdh9
10357155	Inhbb	10465895	Fads2	10443463	Cdkn1a
10582811	Irf2bp2	10399465	Fam84a	10542317	Cdkn1b
10352798	Kcnh1	10540085	Fbln2	10542310	Cdkn1b
10555059	Kctd14	10415651	Fgf9	10500021	Cgn
10423593	Laptm4b	10497548	Fndc3b	10371616	Chpt1
10474419	Lgr4	10605338	G6pdx	10474002	Chrm4
10543544	Lrrc4	10377215	Gas7	10581650	Chst4
10496302	Manba	10487011	Gatm	10595211	Col12a1
10394990	Mboat2	10580233	Gcdh	10559649	Cox6b2
10542221	Mir680-1	10458714	Gm10267	10431564	Cpt1b
10595981	Mras	10483163	Grb14	10514933	Cpt2
10585982	Myo9a	10501229	Gstm1	10565002	Crtc3
10531370	Naaa	10501222	Gstm2	10355193	Crygc
10368534	Ncoa7	10501208	Gstm6	10420372	Cryl1
10530477	Nfxl1	10501199	Gstm7	10579012	Csgalnact1
10530492	Nfxl1	10544114	Hipk2	10428522	Csmd3
10368585	Nkain2	10494643	Hmgcs2	10471058	Cstad
10352969	Npbwr1	10565152	Homer2	10457071	Cyb5
10401382	Numb	10410065	Hsd17b3	10472757	Cybrd1
10530615	Ociad2	10594048	Islr2	10364011	Cytsa
10525439	P2rx4	10403229	Itgb8	10572161	D10627
10430997	Pacsin2	10544150	Jhdm1d	10498998	D930015E06Rik
10553967	Pcsk6	10360972	Kcnk2	10506433	Dab1
10423556	Pgcp	10431659	Kif21a	10492136	Dclk1
10469046	Phyh	10372503	Lgr5	10498204	Dclk1
10519951	Pion	10502510	Lmo4	10510129	Dhrs3
10464328	Pnliprp2	10573939	Lpcat2	10400941	Dhrs7
10421293	Ppp3cc	10446656	Lpin2	10395466	Dock4
10497173	Pxmp3	10473880	Lrp4	10422436	Dock9
10452485	Rab31	10408280	Lrrc16a	10457686	Dsc2
10513922	Rasef	10487447	Mall	10373093	Dtx3
10486061	Rasgrp1	10515295	Mast2	10464400	E330013P04Rik
10442968	Rgs11	10535331	Mmd2	10551614	Ech1
10476759	Rin2	10456587	Mro	10429327	Eif2c2
10602009	Rnf128	10353010	Mybl1	10563441	Emp3
10383214	Rnf213	10371627	Mybpc1	10464391	Emx2
10441565	Rps6ka2	10408850	Nedd9	10523175	Ereg
10499854	S100a1	10410547	Nkd2	10392183	Ern1
10530059	Sel1l3	10562480	Nudt19	10351623	F11r
10585778	Sema7a	10606979	Nup62cl	10375167	Fam196b
10467068	Sgms1	10566136	Olfr543	10540233	Fam19a1
10456140	Sh3tc2	10602198	Pak3	10428912	Fam84b
10589076	Slc25a20	10505489	Pappa	10568436	Fgfr2
10604347	Smarca1	10602474	Phf8	10595911	Foxl2os
10396936	Smoc1	10570855	Plat	10396170	Frmd6
10359161	Soat1	10529979	Ppargc1a	10412260	Fst
10539080	St3gal5	10529977	Ppargc1a	10530421	Gabra4
10569848	Stxbp2	10467206	Ppp1r3c	10405211	Gadd45g
10606619	Sytl4	10380477	Ppp1r9b	10401968	Galc
10601701	Tmem35	10399908	Prkar2b	10496592	Gbp2
10440918	Tmem50b	10480734	Ptgds	10587988	Gk5
10420596	Tnfrsf19	10420957	Ptk2b	10499108	Glt28d2
10535342	Tnrc18	10435383	Ptplb	10507101	Gm12824
10389816	Tom1l1	10453867	Rbbp8	10402378	Gm46
10508376	Trim62	10362633	Rev3l	10442027	Gm9943
10430319	Tst	10598863	Rgn	10487945	Gpcpd1
10365658	Uhrf1bp1l	10419563	Rnase1	10439634	Gtpbp8
10452470	Vapa	10545394	Rnf181	10540275	Gxylt2
10481210	Vav2	10503835	Rragd	10363641	Herc4
10602428	Wnk3	10404612	Rreb1	10604542	Hs6st2
10453272	Zfp36l2	10544875	Scrn1	10531919	Hsd17b11
10575363	Zfp612	10424905	Scx	10397975	Ifi27l1
10606026	Zmym3	10423520	Sema5a	10437846	Ifitm7
		10494174	Sema6c	10436865	Ifngr2
		10355984	Serpine2	10400095	Ifrd1
		10344750	Sgk3	10579958	Il15
		10387516	Shbg	10407173	Il6st
		10495206	Slc16a4	10580577	Irx3
		10511631	Slc26a7	10470214	Kcnt1
		10520187	Slc4a2	10545308	Kdm3a
		10599008	Slc6a14	10598798	Kdm6a
		10378816	Slc6a4	10366052	Kitl
		10418218	Slmap	10472598	Klhl23
		10388185	Smtnl2	10522075	Klhl5
		10575120	Sntb2	10569972	Lass4
		10495285	Sort1	10500876	Lrig2
		10549200	Sox5	10400126	Lrrn3
		10567108	Sox6	10472022	Lypd6b
		10382328	Sox9	10598771	Maoa
		10608193	Sry	10604528	Mbnl3
		10592084	St3gal4	10497773	Mccc1
		10440099	St3gal6	10406334	Mctp1
		10434758	St6gal1	10604612	Mir503
		10384961	Stc2	10430693	Mkl1
		10555681	Stim1	10575662	Mon1b
		10441456	Synj2	10529651	Msx1
		10452633	Tgif1	10437885	Myh11
		10437575	Tmem114	10456653	Myo5b
		10503410	Tmem64	10585984	Myo9a
		10368566	Tpd52l1	10585986	Myo9a
		10589773	Trank1	10555011	Nars2
		10589761	Trank1	10429140	Ndrg1
		10454015	Ttc39c	10575160	Nfat5
		10431017	Ttll1	10408689	Nrn1
		10408613	Tubb2b	10606837	Nxf3
		10475027	Tyro3	10524621	Oasl2
		10501879	Usp53	10584494	Olfr148
		10608107	Uty	10506822	Orc1l
		10391454	Vat1	10462630	Pank1
		10353028	Vcpip1	10467162	Pank1
		10538377	Wipf3	10425852	Parvb
		10505073	Zfp462	10363455	Pcbd1
		10456317	Zfp532	10421911	Pcdh20
		10573008	Zfp827	10565547	Pcf11
				10497399	Pde7a
				10550509	Pglyrp1
				10507273	Pik3r3
				10500069	Pip5k1a
				10373702	Pisd-ps1
				10433887	Pkp2
				10548817	Plbd1
				10491106	Pld1
				10390519	Plxdc1
				10543802	Plxna4
				10464298	Pnlip
				10543791	Podxl
				10465804	Polr2g
				10425987	Ppara
				10397984	Ppp4r4
				10468869	Prdx3
				10418410	Prkcd
				10525506	Psmd9
				10357191	Ptpn4
				10468795	Rab11fip2
				10415332	Rec8
				10539017	Reep1
				10357003	Rnf152
				10580550	Rpgrip1l
				10602772	Rps6ka3
				10508012	Rspo1
				10407598	Ryr2
				10489107	Samhd1
				10371811	Scyl2
				10404422	Serpinb6b
				10463462	Sfxn3
				10552380	Siglecg
				10464370	Slc18a2
				10364402	Slc1a6
				10411751	Slc30a5
				10592266	Slc37a2
				10498024	Slc7a11
				10571444	Slc7a2
				10422240	Slitrk1
				10499906	Smcp
				10516956	Smpdl3b
				10602756	Smpx
				10493864	Sprr2d
				10493867	Sprr2e
				10521543	Stx18
				10443091	Syngap1
				10443080	Syngap1
				10600357	Taz
				10365344	Tcp11l2
				10416709	Tdrd3
				10476042	Tgm3
				10413542	Tkt
				10411459	Tmem171
				10411456	Tmem174
				10465783	Tmem179b
				10352725	Tmem206
				10559547	Tnnt1
				10409602	Trpc7
				10397606	Tshr
				10425999	Ttc38
				10452480	Txndc2
				10531051	Ugt2b36
				10545111	Vmn1r32
				10545119	Vmn1r35
				10552288	Vstm2b
				10407513	Wdr37
				10478540	Wfdc10
				10489503	Wfdc6a
				10509273	Wnt4
				10504499	Zcchc7
				10400109	Zfp277
				10386159	Zfp672
				10376339	Zfp692
				10551777	Zfp790
E11.5 supporting cell depleted
♂+♀		♂		♀
Transcript cluster ID	Gene name	Transcript cluster ID	Gene name	Transcript cluster ID	Gene name
10574415	1700047G07Rik	10392241	Polg2	10354275	1700029F09Rik
10368508	2610036L11Rik			10484425	2700094K13Rik
10586448	2810417H13Rik			10555576	3200002M19Rik
10459643	4930503L19Rik			10457888	5730494M16Rik
10371591	4930547N16Rik			10351867	Aim2
10375402	Adam19			10607116	Ammecr1
10439455	Adprh			10591781	Anln
10367634	Akap12			10428763	Atad2
10602223	Alg13			10402715	Bag5
10485963	Arhgap11a			10520842	Bre
10350392	Aspm			10487480	Bub1
10490104	Aurka			10474875	Casc5
10377405	Aurkb			10497831	Ccna2
10355325	Bard1			10458195	Cdc25c
10382998	Birc5			10516246	Cdca8
10564978	Blm			10369815	Cdk1
10400589	C79407			10496204	Cenpe
10594774	Ccnb2			10360985	Cenpf
10515744	Cdc20			10592201	Chek1
10438378	Cdc45			10402708	Ckb
10520521	Cenpa			10508151	Clspn
10351047	Cenpl			10366293	Csrp2
10575733	Cenpn			10406581	Dhfr
10409190	Cenpp			10419323	Dlgap5
10450957	Cenpq			10558345	Dock1
10462866	Cep55			10547758	Emg1
10577508	Ckap2			10362245	Epb4.1l2
10517336	Clic4			10355893	Epha4
10597758	Csrnp1			10606071	Ercc6l
10474825	D2Ertd750e			10469581	Etl4
10528077	Dbf4			10395457	Etv1
10549506	Dennd5b			10438626	Etv5
10578222	Dlc1			10352048	Exo1
10591612	Dock6			10478160	Fam83d
10361110	Dtl			10384373	Fignl1
10366277	E2f7			10485402	Fjx1
10563780	E2f8			10481540	Fnbp1
10460573	Eif1ad			10468992	Frmd4a
10516640	Eif3i			10527158	Fscn1
10406817	Enc1			10587266	Gclc
10420426	F630043A04Rik			10542650	Golt1b
10355403	Fn1			10584710	H2afx
10391762	Gjc1			10362394	Hddc2
10409557	H2afy			10408077	Hist1h2ak
10606436	Hmgn5			10385248	Hmmr
10590494	Kif15			10493103	Isg20l2
10474381	Kif18a			10462796	Kif11
10391811	Kif18b			10350297	Kif14
10454709	Kif20a			10594251	Kif23
10462632	Kif20b			10422822	Lifr
10568150	Kif22			10455813	Lmnb1
10360745	Lbr			10477004	LOC100044416
10521555	Lyar			10382300	Map2k6
10538832	Mad2l1			10594988	Mapk6
10572906	Mcm5			10353420	Mcm3
10436428	Mina			10568714	Mki67
10474361	Mpped2			10396610	Mthfd1
10583952	Ncapd3			10545672	Mthfd2
10487340	Ncaph			10358091	Nav1
10578690	Neil3			10547943	Ncapd2
10352767	Nek2			10521731	Ncapg
10412921	Nid2			10604053	Nkrf
10352709	Nsl1			10375234	Nudcd2
10359890	Nuf2			10372082	Nudt4
10403361	Pitrm1			10474984	Nusap1
10491805	Plk4			10439218	Pdia5
10365574	Pmch			10557156	Plk1
10384032	Pold2			10524169	Pole
10463517	Pprc1			10466410	Psat1
10538811	Prdm5			10502419	Rap1gds1
10607475	Prdx4			10355050	Raph1
10546834	Rad18			10588037	Rbp1
10493820	S100a6			10509820	Rcc2
10367746	Sash1			10488195	Rrbp1
10459755	Ska1			10555695	Rrm1
10492558	Smc4			10394978	Rrm2
10376885	Snord49b			10531437	Scarb2
10510391	Srm			10523281	Sept11
10489759	Sulf2			10459905	Setbp1
10522024	Tbc1d1			10346365	Sgol2
10484389	Tfpi			10576883	Shcbp1
10478572	Ube2c			10397002	Sipa1l1
10565759	Uvrag			10455873	Slc12a2
				10475990	Slc20a1
				10504957	Smc2
				10591556	Spc24
				10424349	Sqle
				10507112	Stil
				10578572	Stox2
				10479765	Suv39h2
				10427772	Tars
				10536483	Tes
				10466745	Tjp2
				10406530	Tmem167
				10462005	Tmem2
				10422518	Tmtc4
				10390707	Top2a
				10587508	Ttk
				10364293	Ube2g2
				10371676	Utp20
				10398173	Vrk1
				10556266	Wee1
				10410947	Xrcc4
E12.5 supporting cell enriched
♂+♀		♂		♀
Transcript cluster ID	Gene name	Transcript cluster ID	Gene name	Transcript cluster ID	Gene name
10523647	Aff1	10394082	1110031I02Rik	10416588	1300010F03Rik
10533345	Aldh2	10391119	1110036O03Rik	10378749	1700016K19Rik
10545958	Anxa4	10485013	1110051M20Rik	10603316	2010204K13Rik
10600180	Atp2b3	10593913	1700017B05Rik	10580608	2310039D24Rik
10558948	Cd151	10521907	1810013D10Rik	10387723	2810408A11Rik
10457644	Cdh2	10390635	1810046J19Rik	10442231	3110052M02Rik
10438530	Clcn2	10557165	2010110P09Rik	10585347	4930550C14Rik
10420372	Cryl1	10544689	4921507P07Rik	10525487	4932422M17Rik
10513061	Ctnnal1	10476906	8030411F24Rik	10466938	5033414D02Rik
10385391	Cyfip2	10427045	9430023L20Rik	10604505	6720401G13Rik
10365297	D10Wsu102e	10565255	9930013L23Rik	10362711	9030224M15Rik
10511258	Fam132a	10354267	A530098C11Rik	10459262	Ablim3
10454369	Fhod3	10586130	Aagab	10355246	Acadl
10538547	Fkbp9	10433445	Abat	10387768	Acadvl
10504534	Frmpd1	10474181	Abtb2	10397148	Acot1
10405211	Gadd45g	10477649	Acss2	10473847	Acp2
10578771	Galnt7	10410477	Adamts16	10371830	Actr6
10370766	Gamt	10546452	Adamts9	10413086	Adk
10363241	Gcc2	10546432	Adamts9	10556297	Adm
10565152	Homer2	10546450	Adamts9	10354111	Aff3
10345442	Hs6st1	10546454	Adamts9	10404376	Agtr1a
10397975	Ifi27l1	10546430	Adamts9	10519420	Akap9
10555059	Kctd14	10546434	Adamts9	10403291	Akr1c14
10472598	Klhl23	10540207	Adamts9	10504606	Aldh1b1
10394990	Mboat2	10437364	Adcy9	10379153	Aldoc
10604694	Mtap7d3	10344725	Adhfe1	10403796	Amph
10561306	Pld3	10395058	Adi1	10450038	Angptl4
10397984	Ppp4r4	10357878	Adora1	10497090	Ankrd13c
10442968	Rgs11	10468668	Afap1l2	10564818	Anpep
10522976	Rufy3	10441740	Agpat4	10425321	Apobec3
10377560	Sat2	10537169	Akr1b7	10480381	Arhgap21
10492864	Sh3d19	10537146	Akr1b8	10438909	Atp13a3
10584334	Siae	10458960	Aldh7a1	10438911	Atp13a3
10495206	Slc16a4	10351414	Aldh9a1	10410955	Atp6ap1l
10462587	Stambpl1	10364903	Amh	10489891	B4galt5
10569848	Stxbp2	10524588	Ankrd13a	10461017	Bad
10606619	Sytl4	10594631	Aph1b	10557992	Bag3
10352725	Tmem206	10499309	Apoa1bp	10587085	BC031353
10440918	Tmem50b	10430113	Arhgap39	10561369	BC089491
10535342	Tnrc18	10449258	Arhgdig	10587231	Bmp5
10607346	Tspyl2	10500685	Atp1a1	10470182	Bmyc
10572580	Use1	10360270	Atp1a2	10418355	Cacna1d
10602428	Wnk3	10387505	Atp1b2	10469404	Cacnb2
10602255	Zcchc16	10533483	Atp2a2	10436978	Cbr3
		10600377	Atp6ap1	10496605	Ccbl2
		10443021	Atp6v0e	10515894	Ccdc30
		10499666	Atp8b2	10527940	Cdk14
		10600777	AU015836	10528583	Cdk5
		10561104	Axl	10531304	Cdkl2
		10353750	Bag2	10542317	Cdkn1b
		10535559	Baiap2l1	10542310	Cdkn1b
		10583847	Bbs9	10479950	Celf2
		10392685	BC006965	10500021	Cgn
		10392687	BC006965	10594855	Cgnl1
		10576569	BC021891	10371616	Chpt1
		10524568	BC057022	10474002	Chrm4
		10581890	Bcar1	10581650	Chst4
		10495781	Bcar3	10361828	Cited2
		10553015	Bcat2	10574456	Cklf
		10498710	Bche	10567964	Cln3
		10434934	Bdh1	10417167	Clybl
		10469020	Bend7	10463716	Cnnm2
		10606835	Bex2	10349208	Cntnap5a
		10475708	Blvra	10595211	Col12a1
		10443421	Brpf3	10559649	Cox6b2
		10588592	Cacna2d2	10537014	Cpa2
		10417628	Cadps	10460157	Cpt1a
		10433057	Calcoco1	10431564	Cpt1b
		10533529	Camkk2	10351347	Creg1
		10490097	Cbln4	10579012	Csgalnact1
		10385926	Cdc42se2	10457071	Cyb5
		10369307	Cdh23	10472757	Cybrd1
		10458828	Cdo1	10449955	Cyp4f13
		10569163	Cend1	10574641	D230025D16Rik
		10386909	Cenpv	10451679	Daam2
		10470775	Cercam	10405693	Dapk1
		10364102	Chchd10	10359734	Dcaf6
		10460221	Chka	10492136	Dclk1
		10606083	Cited1	10511679	Decr1
		10491313	Cldn11	10350349	Dennd1b
		10527965	Cldn12	10400941	Dhrs7
		10409345	Cltb	10346109	Dnahc7b
		10416057	Clu	10356457	Dnajb3
		10597461	Cmtm7	10400137	Dnajb9
		10381154	Cnp	10421723	Dnajc15
		10483178	Cobll1	10395466	Dock4
		10424140	Col14a1	10601729	Drp2
		10370259	Col18a1	10457686	Dsc2
		10507742	Col9a2	10551614	Ech1
		10479423	Col9a3	10607848	Egfl6
		10490989	Cp	10452980	Eif2ak2
		10544002	Creb3l2	10526968	Elfn1
		10589494	Cspg5	10377938	Eno3
		10488404	Cst11	10477854	Epb4.1l1
		10488415	Cst3	10503659	Epha7
		10476915	Cst8	10523175	Ereg
		10476924	Cst9	10466947	Ermp1
		10362201	Ctgf	10498837	Etfdh
		10363676	Ctnna3	10350630	Fam129a
		10581882	Ctrb1	10545045	Fam13a
		10569319	Ctsd	10420023	Fam158a
		10460468	Ctsf	10568436	Fgfr2
		10587733	Ctsh	10368782	Fig4
		10569569	Cttn	10472097	Fmnl2
		10582303	Cyba	10508412	Fndc5
		10545771	Cyp26b1	10396170	Frmd6
		10561128	Cyp2s1	10412260	Fst
		10596893	Dag1	10522324	Gabrb1
		10422249	Dct	10577164	Gas6
		10488642	Defb19	10389590	Gdpd1
		10432372	Dhh	10601044	Gdpd2
		10389300	Dhrs11	10587988	Gk5
		10518031	Dnajc16	10382830	Gm11744
		10356020	Dock10	10525195	Gm15800
		10421046	Dock5	10585097	Gm5617
		10545623	Dok1	10442027	Gm9943
		10454172	Dsg2	10570955	Golga7
		10404649	Dsp	10487945	Gpcpd1
		10345241	Dst	10472162	Gpd2
		10454254	Dtna	10602896	Gpr64
		10394186	Dtnb	10508052	Grik3
		10488678	Dusp15	10560945	Grik5
		10348194	Efhd1	10540275	Gxylt2
		10518069	Efhd2	10450103	H2-Ke6
		10406254	Ell2	10528929	Hadha
		10510546	Eno1	10494643	Hmgcs2
		10368289	Enpp1	10604542	Hs6st2
		10401454	Entpd5	10531919	Hsd17b11
		10407955	Epdr1	10531910	Hsd17b13
		10537657	Ephb6	10437846	Ifitm7
		10548905	Eps8	10436849	Ifnar1
		10406205	Erap1	10436841	Il10rb
		10380896	Erbb2	10566050	Il18bp
		10373467	Erbb3	10345762	Il1r1
		10355278	Erbb4	10407173	Il6st
		10403558	Ero1lb	10466932	Insl6
		10512851	Erp44	10376326	Irgm2
		10349932	Etnk2	10549282	Itpr2
		10398267	Evl	10453256	Kcng3
		10495675	F3	10545308	Kdm3a
		10465895	Fads2	10366052	Kitl
		10427918	Fam105a	10531899	Klhl8
		10359190	Fam20b	10447437	Klraq1
		10500610	Fam46c	10423593	Laptm4b
		10517263	Fam54b	10551638	Lgals7
		10494208	Fam63a	10453487	Lhcgr
		10425421	Fam83f	10558265	Lhpp
		10399465	Fam84a	10416800	Lmo7
		10571530	Fat1	10499870	Lor
		10540085	Fbln2	10500876	Lrig2
		10532368	Fbrsl1	10579043	Lzts1
		10551542	Fbxo17	10546476	Magi1
		10392881	Fdxr	10603746	Maob
		10604751	Fgf13	10411680	Marveld2
		10415651	Fgf9	10604528	Mbnl3
		10578352	Fgl1	10497773	Mccc1
		10497548	Fndc3b	10598638	Mid1ip1
		10566034	Folr1	10604610	Mir351
		10451613	Foxp4	10430693	Mkl1
		10375956	Fstl4	10401616	Mlh3
		10509127	Fuca1	10514255	Mllt3
		10584883	Fxyd6	10519140	Mmp23
		10420846	Fzd3	10456653	Myo5b
		10534426	Fzd9	10585986	Myo9a
		10521984	G6pd2	10585984	Myo9a
		10605338	G6pdx	10585972	Myo9a
		10377215	Gas7	10354494	Nab1
		10487011	Gatm	10488771	Necab3
		10493435	Gba	10408037	Nkapl
		10422844	Gdnf	10388884	Nlk
		10420362	Gjb2	10524909	Nos1
		10589889	Glb1	10600707	Nr0b1
		10594289	Glce	10556583	Nucb2
		10579548	Glt25d1	10530615	Ociad2
		10572679	Glt25d1	10430997	Pacsin2
		10353036	Gm10567	10356968	Pam
		10425265	Gm10863	10462630	Pank1
		10376208	Gm2a	10467162	Pank1
		10396656	Gm70	10363455	Pcbd1
		10404885	Gmpr	10565547	Pcf11
		10587194	Gnb5	10344707	Pcmtd1
		10603151	Gpm6b	10484283	Pde1a
		10543466	Gpr37	10411171	Pde8b
		10574259	Gpr56	10543017	Pdk4
		10545065	Gprin3	10507273	Pik3r3
		10427026	Grasp	10373702	Pisd-ps1
		10483163	Grb14	10482968	Pla2r1
		10360415	Grem2	10548817	Plbd1
		10587315	Gsta4	10491106	Pld1
		10501222	Gstm2	10360463	Pld5
		10501208	Gstm6	10543802	Plxna4
		10501199	Gstm7	10349694	Pm20d1
		10450154	H2-Aa	10543791	Podxl
		10405811	Habp4	10465804	Polr2g
		10605055	Haus7	10425987	Ppara
		10456798	Hdhd2	10418410	Prkcd
		10462702	Hectd2	10352661	Ptpn14
		10585874	Hexa	10357191	Ptpn4
		10577882	Hgsnat	10400844	Pygl
		10544114	Hipk2	10359034	Qsox1
		10404053	Hist1h2bc	10485372	Rag1
		10369541	Hk1	10486061	Rasgrp1
		10592816	Hmbs	10458090	Reep5
		10565156	Homer2	10539143	Retsat
		10497421	Hps3	10428124	Rgs22
		10410065	Hsd17b3	10357003	Rnf152
		10497285	Impa1	10380116	Rnf43
		10578615	Ing2	10602772	Rps6ka3
		10347669	Inha	10508012	Rspo1
		10357155	Inhbb	10441003	Runx1
		10411235	Iqgap2	10407598	Ryr2
		10594048	Islr2	10499854	S100a1
		10449266	Itfg3	10489107	Samhd1
		10586079	Itga11	10371811	Scyl2
		10435305	Itgb5	10463430	Sema4g
		10458685	Jakmip2	10404422	Serpinb6b
		10544150	Jhdm1d	10463462	Sfxn3
		10463476	Kazald1	10468853	Sfxn4
		10352798	Kcnh1	10572097	Sh2d4a
		10360972	Kcnk2	10369379	Slc29a3
		10421853	Lect1	10411751	Slc30a5
		10507612	Lepre1	10347724	Slc4a3
		10534324	Limk1	10498024	Slc7a11
		10442816	Lmf1	10571444	Slc7a2
		10435193	Lmln	10422240	Slitrk1
		10539263	Loxl3	10516956	Smpdl3b
		10573939	Lpcat2	10545086	Snca
		10573234	Lphn1	10416503	Snora31
		10446656	Lpin2	10379652	Snord7
		10572130	Lpl	10493864	Sprr2d
		10473880	Lrp4	10388377	Srr
		10595109	Lrrc1	10422396	Stk24
		10408280	Lrrc16a	10582466	Sult5a1
		10605766	Maged1	10443091	Syngap1
		10487447	Mall	10443080	Syngap1
		10599962	Mamld1	10600357	Taz
		10564909	Man2a2	10509204	Tcea3
		10573583	Man2b1	10476042	Tgm3
		10496302	Manba	10447951	Thbs2
		10594447	Map2k1	10411459	Tmem171
		10443408	Mapk13	10411456	Tmem174
		10459747	Mapk4	10447120	Tmem178
		10357579	Mapkapk2	10399208	Tmem196
		10520544	Mapre3	10469954	Tmem203
		10560510	Mark4	10601701	Tmem35
		10515295	Mast2	10606902	Tmsb15b1-Tmsb15b2
		10384603	Mdh1	10420596	Tnfrsf19
		10554704	Mesdc2	10559547	Tnnt1
		10349404	Mgat5	10380381	Tob1
		10561187	Mia1	10397683	Ttc8
		10518372	Miip	10452480	Txndc2
		10471880	Mir181b-2	10473356	Ube2l6
		10542221	Mir680-1	10365658	Uhrf1bp1l
		10507218	Mknk1	10545115	Vmn1r33
		10532954	Mlec	10545119	Vmn1r35
		10532944	Mlec	10509273	Wnt4
		10535331	Mmd2	10400109	Zfp277
		10574350	Mmp15	10453272	Zfp36l2
		10500911	Mov10	10575363	Zfp612
		10593937	Mpi	10386159	Zfp672
		10584827	Mpzl2	10376339	Zfp692
		10595979	Mras
		10595981	Mras
		10456587	Mro
		10428690	Mrpl13
		10524684	Msi1
		10599976	Mtm1
		10361366	Mtrf1l
		10575497	Mtss1l
		10504902	Murc
		10545921	Mxd1
		10353010	Mybl1
		10565634	Myo7a
		10580188	Nacc1
		10511084	Nadk
		10381419	Nbr1
		10368534	Ncoa7
		10360205	Ncstn
		10489065	Ndrg3
		10408850	Nedd9
		10553450	Nell1
		10433096	Nfe2
		10409278	Nfil3
		10361869	Nhsl1
		10522368	Nipal1
		10401519	Npc2
		10499811	Npr1
		10482237	Nr5a1
		10429754	Nrbp2
		10600082	Nsdhl
		10587639	Nt5e
		10552938	Ntf5
		10562480	Nudt19
		10500808	Olfml3
		10373036	Os9
		10525439	P2rx4
		10509838	Padi2
		10602198	Pak3
		10510957	Pank4
		10505489	Pappa
		10496110	Papss1
		10462507	Papss2
		10478907	Pard6b
		10534862	Pcolce
		10553967	Pcsk6
		10535043	Pdgfa
		10533085	Pebp1
		10384015	Pgam2
		10555671	Pgap2
		10582649	Pgbd5
		10579335	Pgpep1
		10602474	Phf8
		10425267	Pick1
		10379163	Pigs
		10466779	Pip5k1b
		10533131	Plbd2
		10486119	Plcb2
		10462922	Plce1
		10370983	Plekhj1
		10587829	Plod2
		10546184	Plxna1
		10364251	Pofut2
		10534441	Pom121
		10529979	Ppargc1a
		10529977	Ppargc1a
		10556082	Ppfibp2
		10478145	Ppp1r16b
		10446402	Ppp4r1
		10507784	Ppt1
		10557177	Prkcb
		10447294	Prkce
		10483856	Prkra
		10495854	Prss12
		10363430	Psap
		10480734	Ptgds
		10513320	Ptgr1
		10420957	Ptk2b
		10435383	Ptplb
		10558410	Ptpre
		10515613	Ptprf
		10560709	Pvr
		10584615	Pvrl1
		10480921	Qsox2
		10452485	Rab31
		10506883	Rab3b
		10488322	Ralgapa2
		10381082	Rara
		10531610	Rasgef1b
		10586390	Rasl12
		10440993	Rcan1
		10454771	Reep2
		10364784	Reep6
		10384725	Rel
		10598863	Rgn
		10419563	Rnase1
		10381416	Rnd2
		10411958	Rnf180
		10545394	Rnf181
		10508392	Rnf19b
		10436519	Robo1
		10495252	Romo1
		10591806	rp9
		10441565	Rps6ka2
		10503835	Rragd
		10404612	Rreb1
		10378549	Rtn4rl1
		10587604	Rwdd2a
		10589511	Scap
		10416023	Scara5
		10463355	Scd2
		10492522	Schip1
		10544875	Scrn1
		10476702	Sec23b
		10487154	Secisbp2l
		10530059	Sel1l3
		10499378	Sema4a
		10423520	Sema5a
		10494174	Sema6c
		10585778	Sema7a
		10406598	Serinc5
		10355984	Serpine2
		10525733	Setd8
		10364890	Sf3a2
		10403834	Sfrp4
		10506360	Sgip1
		10344750	Sgk3
		10467068	Sgms1
		10505705	Sh3gl2
		10456140	Sh3tc2
		10387516	Shbg
		10593130	Sidt2
		10458251	Sil1
		10572838	Sin3b
		10475990	Slc20a1
		10499766	Slc27a3
		10470751	Slc27a4
		10455901	Slc27a6
		10431874	Slc38a1
		10598507	Slc38a5
		10505008	Slc44a1
		10583586	Slc44a2
		10429391	Slc45a4
		10520187	Slc4a2
		10436945	Slc5a3
		10599008	Slc6a14
		10600210	Slc6a8
		10345855	Slc9a2
		10564631	Slco3a1
		10456745	Smad7
		10396936	Smoc1
		10388185	Smtnl2
		10575120	Sntb2
		10501762	Snx7
		10380761	Socs7
		10421269	Sorbs3
		10495285	Sort1
		10430458	Sox10
		10448967	Sox8
		10382328	Sox9
		10602722	Spin2
		10561712	Spint2
		10523717	Spp1
		10539080	St3gal5
		10434758	St6gal1
		10475226	Stard9
		10384961	Stc2
		10555681	Stim1
		10526087	Sumf2
		10481147	Surf4
		10513362	Susd1
		10441456	Synj2
		10564482	Synm
		10379795	Synrg
		10577808	Tacc1
		10553935	Tarsl2
		10477090	Tbc1d20
		10354168	Tbc1d8
		10383799	Tcn2
		10525780	Tctn2
		10524955	Tesc
		10452633	Tgif1
		10381006	Thra
		10440738	Tiam1
		10378774	Timm22
		10516735	Tinagl1
		10380285	Tmem100
		10437575	Tmem114
		10426467	Tmem117
		10562096	Tmem147
		10463632	Tmem180
		10535174	Tmem184a
		10349316	Tmem185b
		10503410	Tmem64
		10553324	Tmem86a
		10584870	Tmprss13
		10491136	Tnik
		10413726	Tnnc1
		10386495	Tom1l2
		10359097	Tor1aip1
		10350800	Tor1aip2
		10368566	Tpd52l1
		10590343	Trak1
		10589761	Trank1
		10589773	Trank1
		10505512	Trim32
		10393106	Trim47
		10369531	Tspan15
		10559248	Tspan32
		10598626	Tspan7
		10454015	Ttc39c
		10549594	Ttyh1
		10535231	Ttyh3
		10408613	Tubb2b
		10552966	Tulp2
		10408741	Txndc5
		10475027	Tyro3
		10592515	Ubash3b
		10417759	Ube2e2
		10504234	Unc13b
		10501879	Usp53
		10354258	Uxs1
		10391454	Vat1
		10568328	Vkorc1
		10362138	Vnn1
		10524876	Vsig10
		10545644	Wbp1
		10393098	Wbp2
		10538377	Wipf3
		10575184	Wwp2
		10556598	Xylt1
		10425578	Zc3h7b
		10544089	Zc3hav1
		10600093	Zfp185
		10415991	Zfp395
		10606026	Zmym3
		10383982	Znrf3
E12.5 supporting cell depleted
♂+♀		♂		♀
Transcript cluster ID	Gene name	Transcript cluster ID	Gene name	Transcript cluster ID	Gene name
10375402	Adam19	10574415	1700047G07Rik	10354275	1700029F09Rik
10351867	Aim2	10549171	5730419I09Rik	10440794	2610039C10Rik
10536324	Asb4	10457888	5730494M16Rik	10586448	2810417H13Rik
10366293	Csrp2	10590844	9030420J04Rik	10555576	3200002M19Rik
10549506	Dennd5b	10590860	9030420J04Rik	10401852	4930534B04Rik
10578222	Dlc1	10409737	Agtpbp1	10371591	4930547N16Rik
10558345	Dock1	10377804	Arrb2	10416736	6720463M24Rik
10591612	Dock6	10419261	Bmp4	10473024	Agps
10447141	Eml4	10544219	Braf	10367634	Akap12
10570982	Fgfr1	10352194	Cdc42bpa	10607116	Ammecr1
10355403	Fn1	10483719	Chn1	10591781	Anln
10391762	Gjc1	10423836	Cthrc1	10485963	Arhgap11a
10360745	Lbr	10533401	Cux2	10350392	Aspm
10517463	Luzp1	10440427	D16Ertd472e	10428763	Atad2
10412921	Nid2	10596279	Dnajc13	10490104	Aurka
10601942	Nrk	10599120	Dock11	10377405	Aurkb
10607587	Pdha1	10542677	Etnk1	10355325	Bard1
10493820	S100a6	10517967	Fblim1	10355327	Bard1
10367746	Sash1	10351039	Gas5	10382998	Birc5
10458033	Stard4	10350753	Glul	10564978	Blm
10489759	Sulf2	10435271	Heg1	10389395	Brip1
10522024	Tbc1d1	10358652	Hmcn1	10487480	Bub1
10484389	Tfpi	10358561	Hmcn1	10474769	Bub1b
10551883	Tyrobp	10358670	Hmcn1	10436106	C330027C09Rik
10401172	Vti1b	10358668	Hmcn1	10400589	C79407
		10358664	Hmcn1	10474875	Casc5
		10358583	Hmcn1	10497831	Ccna2
		10358585	Hmcn1	10594774	Ccnb2
		10358656	Hmcn1	10503264	Ccne2
		10358654	Hmcn1	10448506	Ccnf
		10358650	Hmcn1	10515744	Cdc20
		10358615	Hmcn1	10458195	Cdc25c
		10358617	Hmcn1	10438378	Cdc45
		10358565	Hmcn1	10421029	Cdca2
		10358533	Hmcn1	10541729	Cdca3
		10358666	Hmcn1	10516246	Cdca8
		10358563	Hmcn1	10369815	Cdk1
		10358581	Hmcn1	10414315	Cdkn3
		10358559	Hmcn1	10520521	Cenpa
		10358648	Hmcn1	10496204	Cenpe
		10358658	Hmcn1	10360985	Cenpf
		10358662	Hmcn1	10411728	Cenph
		10358567	Hmcn1	10601705	Cenpi
		10358577	Hmcn1	10575733	Cenpn
		10358605	Hmcn1	10450957	Cenpq
		10358613	Hmcn1	10462866	Cep55
		10358535	Hmcn1	10524266	Chek2
		10358591	Hmcn1	10524790	Cit
		10358579	Hmcn1	10577508	Ckap2
		10358575	Hmcn1	10487577	Ckap2l
		10358573	Hmcn1	10499639	Cks1b
		10358569	Hmcn1	10508151	Clspn
		10358623	Hmcn1	10450374	D17H6S56E-5
		10358553	Hmcn1	10474825	D2Ertd750e
		10358529	Hmcn1	10528077	Dbf4
		10358527	Hmcn1	10421877	Diap3
		10358599	Hmcn1	10419323	Dlgap5
		10358633	Hmcn1	10591369	Dnmt1
		10358517	Hmcn1	10428672	Dscc1
		10358631	Hmcn1	10361110	Dtl
		10358601	Hmcn1	10366043	Dusp6
		10358571	Hmcn1	10366277	E2f7
		10358593	Hmcn1	10563780	E2f8
		10358589	Hmcn1	10497520	Ect2
		10358625	Hmcn1	10523058	Eif5a
		10358519	Hmcn1	10606071	Ercc6l
		10358555	Hmcn1	10420877	Esco2
		10358531	Hmcn1	10469581	Etl4
		10358660	Hmcn1	10395457	Etv1
		10358609	Hmcn1	10352048	Exo1
		10358611	Hmcn1	10498168	Exosc8
		10358637	Hmcn1	10420426	F630043A04Rik
		10569017	Ifitm3	10503617	F730047E07Rik
		10355141	Klf7	10461723	Fam111a
		10496091	Lef1	10478160	Fam83d
		10406031	Lpcat1	10465912	Fen1
		10500847	Magi3	10384373	Fignl1
		10447617	Mir692-1	10542079	Foxm1
		10514000	Mpdz	10395612	G2e3
		10354432	Myo1b	10371770	Gas2l3
		10587107	Myo5a	10399391	Gen1
		10502830	Nexn	10543118	Glcci1
		10366310	Osbpl8	10480087	Gm13310
		10555118	Pak1	10548699	Gm8956
		10578829	Palld	10408321	Gmnn
		10522009	Pgm1	10388234	Gsg2
		10480347	Pip4k2a	10584710	H2afx
		10476443	Plcb4	10385248	Hmmr
		10558134	Plekha1	10509777	Iffo2
		10410892	Rasa1	10465861	Incenp
		10606969	Rbm41	10462796	Kif11
		10344952	Rdh10	10350297	Kif14
		10593205	Rexo2	10590494	Kif15
		10489107	Samhd1	10474381	Kif18a
		10592585	Sc5d	10454709	Kif20a
		10389719	Scpep1	10462632	Kif20b
		10422598	Sepp1	10568150	Kif22
		10484227	Sestd1	10594251	Kif23
		10461158	Snhg1	10515431	Kif2c
		10461152	Snhg1	10601011	Kif4
		10351043	Snord47	10525591	Kntc1
		10467425	Sorbs1	10444595	Lsm2
		10406551	Ssbp2	10521555	Lyar
		10435048	Tctex1d2	10538832	Mad2l1
		10400023	Tspan13	10480432	Mastl
		10494428	Txnip	10353420	Mcm3
				10572906	Mcm5
				10504470	Melk
				10568714	Mki67
				10424188	Mtbp
				10547943	Ncapd2
				10521731	Ncapg
				10487340	Ncaph
				10452709	Ndc80
				10578690	Neil3
				10352767	Nek2
				10352709	Nsl1
				10413710	Nt5dc2
				10372082	Nudt4
				10359890	Nuf2
				10378902	Nufip2
				10574033	Nup93
				10474984	Nusap1
				10557156	Plk1
				10491805	Plk4
				10365574	Pmch
				10499366	Pmf1
				10465282	Pola2
				10524169	Pole
				10435581	Polq
				10396068	Ppil5
				10554445	Prc1
				10607475	Prdx4
				10367076	Prim1
				10453715	Rab18
				10432511	Racgap1
				10546834	Rad18
				10474902	Rad51
				10515257	Rad54l
				10533090	Rfc5
				10436519	Robo1
				10488195	Rrbp1
				10394978	Rrm2
				10495574	Sass6
				10523281	Sept11
				10451805	Sgol1
				10346365	Sgol2
				10576883	Shcbp1
				10459755	Ska1
				10504957	Smc2
				10492558	Smc4
				10553993	Snrpa1
				10379127	Spag5
				10591556	Spc24
				10483401	Spc25
				10507112	Stil
				10521090	Tacc3
				10390707	Top2a
				10477187	Tpx2
				10587508	Ttk
				10478572	Ube2c
				10398173	Vrk1
				10475362	Wdr76
				10594426	Zwilch
E13.5 supporting cell enriched
♂+♀		♂		♀
Transcript cluster ID	Gene name	Transcript cluster ID	Gene name	Transcript cluster ID	Gene name
10386652	Aldh3a2	10391119	1110036O03Rik	10516277	1700029G01Rik
10427222	Amhr2	10593913	1700017B05Rik	10497086	1810013D15Rik
10545958	Anxa4	10521907	1810013D10Rik	10603316	2010204K13Rik
10530100	Arap2	10478962	2010011I20Rik	10574572	2210023G05Rik
10455259	Arhgap26	10557165	2010110P09Rik	10580608	2310039D24Rik
10561369	BC089491	10552000	2200002J24Rik	10452110	2410015M20Rik
10558948	Cd151	10508996	2610002D18Rik	10519052	2810405K02Rik
10457644	Cdh2	10556790	2610020H08Rik	10387723	2810408A11Rik
10438530	Clcn2	10512915	2810432L12Rik	10523516	4930524J08Rik
10578904	Cpe	10344743	3110035E14Rik	10466938	5033414D02Rik
10420372	Cryl1	10544689	4921507P07Rik	10405619	5133401N09Rik
10476919	Cst13	10575578	4930402E16Rik	10590323	5830454E08Rik
10451679	Daam2	10409857	4930486L24Rik	10470388	5930434B04Rik
10551614	Ech1	10501374	5330417C22Rik	10604505	6720401G13Rik
10506767	Echdc2	10599342	6030498E09Rik	10362711	9030224M15Rik
10403558	Ero1lb	10476906	8030411F24Rik	10457475	Abhd3
10524941	Fbxo21	10488709	8430427H17Rik	10459262	Ablim3
10578771	Galnt7	10488409	9230104L09Rik	10355246	Acadl
10370766	Gamt	10427045	9430023L20Rik	10397148	Acot1
10567355	Gprc5b	10565255	9930013L23Rik	10556769	Acsm3
10424731	Gsdmd	10586130	Aagab	10371830	Actr6
10394778	Hpcal1	10501832	Abcd3	10554074	Adamts17
10345442	Hs6st1	10415021	Abhd4	10554057	Adamts17
10505200	Hsdl2	10474181	Abtb2	10463911	Add3
10397975	Ifi27l1	10350777	Acbd6	10365136	Aes
10572432	Isyna1	10477649	Acss2	10516213	Akirin1
10432918	Krt8	10410477	Adamts16	10403291	Akr1c14
10394990	Mboat2	10546450	Adamts9	10504606	Aldh1b1
10359861	Mgst3	10546452	Adamts9	10403796	Amph
10504902	Murc	10540207	Adamts9	10569618	Ano1
10528332	Napepld	10546432	Adamts9	10564818	Anpep
10478907	Pard6b	10546454	Adamts9	10425321	Apobec3
10461093	Pla2g16	10546434	Adamts9	10567219	Arl6ip1
10548817	Plbd1	10437364	Adcy9	10438909	Atp13a3
10442968	Rgs11	10344725	Adhfe1	10438911	Atp13a3
10383214	Rnf213	10357878	Adora1	10410955	Atp6ap1l
10377560	Sat2	10441740	Agpat4	10491520	B230207O21Rik
10387100	Shisa6	10537169	Akr1b7	10437210	Bace2
10584334	Siae	10537146	Akr1b8	10557992	Bag3
10462587	Stambpl1	10461979	Aldh1a1	10587085	BC031353
10555681	Stim1	10351414	Aldh9a1	10576844	BC068157
10569848	Stxbp2	10364903	Amh	10549276	Bhlhe41
10371240	Tle6	10524588	Ankrd13a	10587231	Bmp5
10440918	Tmem50b	10605143	Arhgap4	10395831	Brms1l
10424331	Trmt12	10449258	Arhgdig	10579532	Bst2
10598626	Tspan7	10570483	Arhgef10	10418355	Cacna1d
10555389	Ucp2	10345411	Arhgef4	10496023	Casp6
10545409	Vamp8	10500685	Atp1a1	10436978	Cbr3
10544089	Zc3hav1	10387505	Atp1b2	10496605	Ccbl2
		10366004	Atp2b1	10592856	Ccdc84
		10443021	Atp6v0e	10485405	Cd44
		10530319	Atp8a1	10527940	Cdk14
		10499666	Atp8b2	10528583	Cdk5
		10600777	AU015836	10542310	Cdkn1b
		10534168	Auts2	10542317	Cdkn1b
		10561104	Axl	10500021	Cgn
		10417124	B930095G15Rik	10371616	Chpt1
		10392685	BC006965	10474002	Chrm4
		10392687	BC006965	10574456	Cklf
		10576569	BC021891	10567964	Cln3
		10358991	BC034090	10417167	Clybl
		10581890	Bcar1	10423505	Cmbl
		10495781	Bcar3	10468249	Cnnm2
		10553015	Bcat2	10349208	Cntnap5a
		10469020	Bend7	10595211	Col12a1
		10606835	Bex2	10559649	Cox6b2
		10560530	Bloc1s3	10537014	Cpa2
		10475708	Blvra	10351347	Creg1
		10443421	Brpf3	10355199	Crygb
		10588592	Cacna2d2	10579012	Csgalnact1
		10585048	Cadm1	10503023	Cth
		10417628	Cadps	10472757	Cybrd1
		10433057	Calcoco1	10385391	Cyfip2
		10506929	Calr4	10449955	Cyp4f13
		10533529	Camkk2	10443898	Cyp4f15
		10490097	Cbln4	10572161	D10627
		10599604	Ccdc160	10365297	D10Wsu102e
		10574226	Ccl17	10574641	D230025D16Rik
		10486564	Cdan1	10513190	D630039A03Rik
		10385926	Cdc42se2	10506433	Dab1
		10369307	Cdh23	10492136	Dclk1
		10547513	Cecr5	10350349	Dennd1b
		10386909	Cenpv	10510129	Dhrs3
		10470775	Cercam	10415176	Dhrs4
		10364102	Chchd10	10400941	Dhrs7
		10460221	Chka	10356457	Dnajb3
		10490845	Chmp4c	10400137	Dnajb9
		10606083	Cited1	10421723	Dnajc15
		10491313	Cldn11	10601729	Drp2
		10442327	Cldn6	10457686	Dsc2
		10548359	Clec12b	10607848	Egfl6
		10409345	Cltb	10452980	Eif2ak2
		10416057	Clu	10526968	Elfn1
		10597461	Cmtm7	10464391	Emx2
		10589934	Cmtm7	10428619	Enpp2
		10530503	Cnga1	10477854	Epb4.1l1
		10424140	Col14a1	10466947	Ermp1
		10479423	Col9a3	10552418	Etfb
		10490989	Cp	10542275	Etv6
		10504349	Creb3	10437963	Fam128b
		10446986	Crim1	10350630	Fam129a
		10589494	Cspg5	10420023	Fam158a
		10488404	Cst11	10375167	Fam196b
		10488415	Cst3	10532150	Fam69a
		10476924	Cst9	10428912	Fam84b
		10362201	Ctgf	10368782	Fig4
		10545538	Ctnna2	10472097	Fmnl2
		10363676	Ctnna3	10595911	Foxl2os
		10513061	Ctnnal1	10396170	Frmd6
		10581882	Ctrb1	10412260	Fst
		10587733	Ctsh	10603785	Fundc1
		10410124	Ctsl	10401968	Galc
		10569569	Cttn	10577164	Gas6
		10436608	Cxadr	10389590	Gdpd1
		10454851	Cxxc5	10601044	Gdpd2
		10544687	Cycs	10587988	Gk5
		10501754	D3Bwg0562e	10591884	Glb1l2
		10556208	D930014E17Rik	10406270	Glrx
		10596893	Dag1	10382830	Gm11744
		10444056	Daxx	10585097	Gm5617
		10496727	Ddah1	10570955	Golga7
		10450579	Ddr1	10487945	Gpcpd1
		10488642	Defb19	10483679	Gpr155
		10477134	Defb36	10602896	Gpr64
		10432372	Dhh	10508052	Grik3
		10363669	Dnajc12	10424781	Grina
		10356020	Dock10	10528929	Hadha
		10404649	Dsp	10494643	Hmgcs2
		10345241	Dst	10531919	Hsd17b11
		10454254	Dtna	10436849	Ifnar1
		10394186	Dtnb	10376326	Irgm2
		10488678	Dusp15	10549282	Itpr2
		10548735	Dusp16	10344935	Kcnb2
		10348194	Efhd1	10545308	Kdm3a
		10518069	Efhd2	10424559	Khdrbs3
		10604393	Elf4	10366052	Kitl
		10510546	Eno1	10602704	Klf8
		10401454	Entpd5	10472598	Klhl23
		10407955	Epdr1	10531899	Klhl8
		10548905	Eps8	10427075	Krt18
		10406205	Erap1	10551638	Lgals7
		10380896	Erbb2	10453487	Lhcgr
		10373467	Erbb3	10416800	Lmo7
		10355278	Erbb4	10500876	Lrig2
		10599650	Etd	10482929	Ly75
		10349932	Etnk2	10546476	Magi1
		10398267	Evl	10603746	Maob
		10495675	F3	10551666	Map4k1
		10427918	Fam105a	10375634	Mapk9
		10528527	Fam126a	10604528	Mbnl3
		10449034	Fam173a	10497773	Mccc1
		10536949	Fam40b	10459730	Me2
		10500610	Fam46c	10491952	Mgst2
		10517263	Fam54b	10598638	Mid1ip1
		10425421	Fam83f	10514255	Mllt3
		10571530	Fat1	10347036	Mtap2
		10540085	Fbln2	10477920	Myl9
		10532368	Fbrsl1	10404874	Mylip
		10604751	Fgf13	10354494	Nab1
		10385036	Fgf18	10488771	Necab3
		10415651	Fgf9	10565840	Neu3
		10449452	Fkbp5	10388884	Nlk
		10481540	Fnbp1	10504375	Npr2
		10497548	Fndc3b	10556583	Nucb2
		10566034	Folr1	10530615	Ociad2
		10451613	Foxp4	10470529	Olfm1
		10495596	Frrs1	10479833	Optn
		10509127	Fuca1	10430997	Pacsin2
		10584883	Fxyd6	10462630	Pank1
		10420846	Fzd3	10467162	Pank1
		10605338	G6pdx	10375216	Pank3
		10440929	Gart	10363455	Pcbd1
		10377215	Gas7	10565547	Pcf11
		10487011	Gatm	10441680	Pde10a
		10580233	Gcdh	10411171	Pde8b
		10466521	Gcnt1	10543017	Pdk4
		10422844	Gdnf	10574488	Pdp2
		10420362	Gjb2	10568266	Phkg2
		10589889	Glb1	10373702	Pisd-ps1
		10579548	Glt25d1	10482968	Pla2r1
		10353036	Gm10567	10561306	Pld3
		10425265	Gm10863	10360463	Pld5
		10507471	Gm13015	10514221	Plin2
		10376208	Gm2a	10465804	Polr2g
		10396656	Gm70	10397984	Ppp4r4
		10400710	Gm71	10507328	Prdx1
		10404885	Gmpr	10357191	Ptpn4
		10587194	Gnb5	10359034	Qsox1
		10512640	Gne	10486061	Rasgrp1
		10598381	Gpkow	10527538	Rasl11a
		10529957	Gpr125	10542738	Rassf8
		10543466	Gpr37	10428124	Rgs22
		10574259	Gpr56	10566067	Rnf121
		10545065	Gprin3	10602009	Rnf128
		10483163	Grb14	10375667	Rnf130
		10360415	Grem2	10357003	Rnf152
		10501208	Gstm6	10380116	Rnf43
		10501199	Gstm7	10602772	Rps6ka3
		10450154	H2-Aa	10508012	Rspo1
		10605055	Haus7	10441003	Runx1
		10456798	Hdhd2	10407598	Ryr2
		10462702	Hectd2	10499854	S100a1
		10585874	Hexa	10493995	S100a10
		10381697	Hexim1	10489107	Samhd1
		10404053	Hist1h2bc	10371811	Scyl2
		10545588	Hk2	10551881	Sdhaf1
		10380622	Hoxb9	10561907	Sdhaf1
		10381218	Hsd17b1	10463430	Sema4g
		10558150	Htra1	10492628	Serpini1
		10497285	Impa1	10463462	Sfxn3
		10357155	Inhbb	10495206	Slc16a4
		10594048	Islr2	10487906	Slc23a2
		10449266	Itfg3	10589076	Slc25a20
		10458685	Jakmip2	10428328	Slc25a32
		10436666	Jam2	10371321	Slc41a2
		10544150	Jhdm1d	10347724	Slc4a3
		10419790	Jub	10347697	Slc4a3
		10463476	Kazald1	10498024	Slc7a11
		10548051	Kcna6	10571444	Slc7a2
		10352798	Kcnh1	10368806	Smpd2
		10431659	Kif21a	10501922	Snhg8
		10421853	Lect1	10416503	Snora31
		10534324	Limk1	10504002	Spink4
		10442816	Lmf1	10493864	Sprr2d
		10435193	Lmln	10422396	Stk24
		10573939	Lpcat2	10504849	Stx17
		10573234	Lphn1	10458424	Taf7
		10572130	Lpl	10606789	Tceal6
		10595109	Lrrc1	10406086	Tert
		10408280	Lrrc16a	10447951	Thbs2
		10404129	Lrrc16a	10411459	Tmem171
		10562181	Lsr	10411456	Tmem174
		10605766	Maged1	10447120	Tmem178
		10487447	Mall	10462918	Tmem20
		10599962	Mamld1	10601701	Tmem35
		10564909	Man2a2	10420596	Tnfrsf19
		10594447	Map2k1	10380381	Tob1
		10412100	Map3k1	10399470	Trib2
		10443408	Mapk13	10382376	Ttyh2
		10459747	Mapk4	10522208	Uchl1
		10357579	Mapkapk2	10545119	Vmn1r35
		10438708	Masp1	10489503	Wfdc6a
		10515295	Mast2	10386937	Zfp286
		10406423	Mblac2	10442219	Zfp52
		10492231	Med12l	10575363	Zfp612
		10554704	Mesdc2	10386159	Zfp672
		10397364	Mfsd7c	10489253	Zhx3
		10561187	Mia1	10489723	Zmynd8
		10518372	Miip
		10462504	Minpp1
		10542221	Mir680-1
		10532954	Mlec
		10532944	Mlec
		10581813	Mlkl
		10442458	Mlst8
		10535331	Mmd2
		10370037	Mmp11
		10519140	Mmp23
		10500911	Mov10
		10593937	Mpi
		10584827	Mpzl2
		10595979	Mras
		10595981	Mras
		10456587	Mro
		10428690	Mrpl13
		10465336	Mrpl49
		10524684	Msi1
		10574023	Mt2
		10411519	Mtap1b
		10604694	Mtap7d3
		10599976	Mtm1
		10361366	Mtrf1l
		10545921	Mxd1
		10393379	Mxra7
		10353010	Mybl1
		10473814	Mybpc3
		10495306	Mybphl
		10565634	Myo7a
		10535938	N4bp2l1
		10373313	Nab2
		10580188	Nacc1
		10368534	Ncoa7
		10408850	Nedd9
		10553450	Nell1
		10433096	Nfe2
		10409278	Nfil3
		10361869	Nhsl1
		10361882	Nhsl1
		10522368	Nipal1
		10358879	Npl
		10499811	Npr1
		10429754	Nrbp2
		10587639	Nt5e
		10562480	Nudt19
		10449363	Nudt3
		10372082	Nudt4
		10606837	Nxf3
		10354418	Obfc2a
		10435212	Osbpl11
		10525439	P2rx4
		10509838	Padi2
		10602198	Pak3
		10505489	Pappa
		10535043	Pdgfa
		10439218	Pdia5
		10533085	Pebp1
		10384015	Pgam2
		10555671	Pgap2
		10579335	Pgpep1
		10602474	Phf8
		10592891	Phldb1
		10466779	Pip5k1b
		10517655	Pla2g5
		10486119	Plcb2
		10462922	Plce1
		10562576	Plekhf1
		10587829	Plod2
		10546184	Plxna1
		10589368	Plxnb1
		10372028	Plxnc1
		10464328	Pnliprp2
		10534441	Pom121
		10529979	Ppargc1a
		10556082	Ppfibp2
		10478145	Ppp1r16b
		10536297	Ppp1r9a
		10507784	Ppt1
		10557177	Prkcb
		10447294	Prkce
		10483856	Prkra
		10495854	Prss12
		10466410	Psat1
		10480734	Ptgds
		10573210	Ptger1
		10513320	Ptgr1
		10420957	Ptk2b
		10435383	Ptplb
		10401997	Ptpn21
		10558410	Ptpre
		10515613	Ptprf
		10560709	Pvr
		10480921	Qsox2
		10452485	Rab31
		10506883	Rab3b
		10488322	Ralgapa2
		10381082	Rara
		10531610	Rasgef1b
		10586390	Rasl12
		10440993	Rcan1
		10454771	Reep2
		10364784	Reep6
		10384725	Rel
		10533844	Rilpl2
		10381416	Rnd2
		10375343	Rnf145
		10411958	Rnf180
		10545394	Rnf181
		10469951	Rnf208
		10495252	Romo1
		10591806	rp9
		10441565	Rps6ka2
		10404612	Rreb1
		10378549	Rtn4rl1
		10587604	Rwdd2a
		10416023	Scara5
		10463355	Scd2
		10492522	Schip1
		10544875	Scrn1
		10476702	Sec23b
		10530059	Sel1l3
		10499378	Sema4a
		10423520	Sema5a
		10494174	Sema6c
		10585778	Sema7a
		10398025	Serpina3a
		10355984	Serpine2
		10525733	Setd8
		10403834	Sfrp4
		10344750	Sgk3
		10467068	Sgms1
		10505705	Sh3gl2
		10456140	Sh3tc2
		10387516	Shbg
		10593130	Sidt2
		10458251	Sil1
		10572838	Sin3b
		10364402	Slc1a6
		10475990	Slc20a1
		10419874	Slc22a17
		10475567	Slc24a5
		10438262	Slc25a1
		10511631	Slc26a7
		10455901	Slc27a6
		10431874	Slc38a1
		10431872	Slc38a1
		10598507	Slc38a5
		10429391	Slc45a4
		10520187	Slc4a2
		10412773	Slc4a7
		10599008	Slc6a14
		10600210	Slc6a8
		10535852	Slc7a1
		10582275	Slc7a5
		10345855	Slc9a2
		10564631	Slco3a1
		10418218	Slmap
		10456745	Smad7
		10388185	Smtnl2
		10501762	Snx7
		10368918	Sobp
		10372069	Socs2
		10421269	Sorbs3
		10495285	Sort1
		10430458	Sox10
		10567108	Sox6
		10448967	Sox8
		10382328	Sox9
		10509910	Spata21
		10561712	Spint2
		10523717	Spp1
		10592084	St3gal4
		10539080	St3gal5
		10434758	St6gal1
		10384961	Stc2
		10526087	Sumf2
		10513362	Susd1
		10607694	Syap1
		10496748	Syde2
		10396608	Syne2
		10441456	Synj2
		10379795	Synrg
		10606619	Sytl4
		10577808	Tacc1
		10444068	Tapbp
		10553935	Tarsl2
		10354168	Tbc1d8
		10383799	Tcn2
		10525780	Tctn2
		10425601	Tef
		10419471	Tep1
		10524955	Tesc
		10401673	Tgfb3
		10381006	Thra
		10440738	Tiam1
		10378774	Timm22
		10516735	Tinagl1
		10567316	Tmc7
		10365891	Tmcc3
		10437575	Tmem114
		10426467	Tmem117
		10539111	Tmem150a
		10463632	Tmem180
		10535174	Tmem184a
		10349316	Tmem185b
		10462005	Tmem2
		10485830	Tmem85
		10584870	Tmprss13
		10448307	Tnfrsf12a
		10491136	Tnik
		10413726	Tnnc1
		10559558	Tnni3
		10386495	Tom1l2
		10350800	Tor1aip2
		10350792	Tor1aip2
		10511416	Tox
		10497214	Tpd52
		10368566	Tpd52l1
		10590343	Trak1
		10589761	Trank1
		10589773	Trank1
		10499045	Trim2
		10505512	Trim32
		10393106	Trim47
		10497862	Trpc3
		10369531	Tspan15
		10405343	Tspan17
		10559248	Tspan32
		10454015	Ttc39c
		10549594	Ttyh1
		10535231	Ttyh3
		10408613	Tubb2b
		10576332	Tubb3
		10552966	Tulp2
		10475027	Tyro3
		10379176	Unc119
		10504234	Unc13b
		10501879	Usp53
		10354258	Uxs1
		10433274	Vasn
		10362138	Vnn1
		10524878	Vsig10
		10524876	Vsig10
		10524874	Vsig10
		10538377	Wipf3
		10602428	Wnk3
		10524882	Wsb2
		10575184	Wwp2
		10556598	Xylt1
		10530496	Zar1
		10593497	Zc3h12c
		10593492	Zc3h12c
		10425578	Zc3h7b
		10600093	Zfp185
		10600150	Zfp275
		10415991	Zfp395
		10416004	Zfp395
		10591754	Zfp599
		10606026	Zmym3
		10538413	Znrf2
E13.5 supporting cell depleted
♂+♀		♂		♀
Transcript cluster ID	Gene name	Transcript cluster ID	Gene name	Transcript cluster ID	Gene name
10459643	4930503L19Rik	10574415	1700047G07Rik	10368508	2610036L11Rik
10375402	Adam19	10549171	5730419I09Rik	10586448	2810417H13Rik
10402708	Ckb	10457888	5730494M16Rik	10495945	4930422G04Rik
10447141	Eml4	10590844	9030420J04Rik	10401852	4930534B04Rik
10570982	Fgfr1	10590860	9030420J04Rik	10371591	4930547N16Rik
10391762	Gjc1	10432190	Adcy6	10416736	6720463M24Rik
10350753	Glul	10409737	Agtpbp1	10482824	Acvr1
10517463	Luzp1	10570201	Atp11a	10473024	Agps
10601942	Nrk	10557992	Bag3	10367634	Akap12
10556528	Pde3b	10603206	BC022960	10591781	Anln
		10419261	Bmp4	10485963	Arhgap11a
		10514177	Bnc2	10350392	Aspm
		10352194	Cdc42bpa	10428763	Atad2
		10423836	Cthrc1	10366004	Atp2b1
		10440427	D16Ertd472e	10486029	Atpbd4
		10599120	Dock11	10490104	Aurka
		10546685	Eif4e3	10377405	Aurkb
		10568436	Fgfr2	10382998	Birc5
		10351039	Gas5	10564978	Blm
		10435271	Heg1	10389395	Brip1
		10497203	Hey1	10487480	Bub1
		10358652	Hmcn1	10474769	Bub1b
		10358583	Hmcn1	10436106	C330027C09Rik
		10358664	Hmcn1	10400589	C79407
		10358533	Hmcn1	10474875	Casc5
		10358650	Hmcn1	10385153	Ccdc99
		10358668	Hmcn1	10497831	Ccna2
		10358617	Hmcn1	10594774	Ccnb2
		10358581	Hmcn1	10515744	Cdc20
		10358670	Hmcn1	10458195	Cdc25c
		10358615	Hmcn1	10438378	Cdc45
		10358585	Hmcn1	10381072	Cdc6
		10358654	Hmcn1	10421029	Cdca2
		10358553	Hmcn1	10541729	Cdca3
		10358535	Hmcn1	10399178	Cdca7l
		10358613	Hmcn1	10516246	Cdca8
		10358575	Hmcn1	10369815	Cdk1
		10358658	Hmcn1	10520521	Cenpa
		10358666	Hmcn1	10496204	Cenpe
		10358662	Hmcn1	10360985	Cenpf
		10358619	Hmcn1	10411728	Cenph
		10358579	Hmcn1	10601705	Cenpi
		10358591	Hmcn1	10406968	Cenpk
		10358605	Hmcn1	10575733	Cenpn
		10358623	Hmcn1	10462866	Cep55
		10358637	Hmcn1	10446027	Chaf1a
		10358609	Hmcn1	10592201	Chek1
		10358607	Hmcn1	10577508	Ckap2
		10569017	Ifitm3	10487577	Ckap2l
		10390209	Igf2bp1	10508151	Clspn
		10413416	Il17rd	10366293	Csrp2
		10522530	Kit	10450374	D17H6S56E-5
		10496091	Lef1	10474825	D2Ertd750e
		10432540	Lima1	10528077	Dbf4
		10403604	Lyst	10421877	Diap3
		10361065	Mfsd7b	10419323	Dlgap5
		10447617	Mir692-1	10591369	Dnmt1
		10514000	Mpdz	10428672	Dscc1
		10354432	Myo1b	10361110	Dtl
		10586781	Myo1e	10563780	E2f8
		10587107	Myo5a	10497520	Ect2
		10585982	Myo9a	10606071	Ercc6l
		10366310	Osbpl8	10420877	Esco2
		10607587	Pdha1	10438626	Etv5
		10480347	Pip4k2a	10352048	Exo1
		10511498	Plekhf2	10420426	F630043A04Rik
		10500295	Plekho1	10503617	F730047E07Rik
		10560315	Ppp5c	10461723	Fam111a
		10538811	Prdm5	10361375	Fbxo5
		10355050	Raph1	10384373	Fignl1
		10410892	Rasa1	10542079	Foxm1
		10606969	Rbm41	10395612	G2e3
		10389719	Scpep1	10371770	Gas2l3
		10517169	Sh3bgrl3	10399391	Gen1
		10385872	Slc22a5	10408321	Gmnn
		10487906	Slc23a2	10418480	Gnl3
		10467425	Sorbs1	10376201	Gpx3
		10397895	Ubr7	10388234	Gsg2
				10584710	H2afx
				10462973	Hells
				10408200	Hist1h4f
				10385248	Hmmr
				10465861	Incenp
				10462796	Kif11
				10350297	Kif14
				10590494	Kif15
				10474381	Kif18a
				10391811	Kif18b
				10454709	Kif20a
				10462632	Kif20b
				10568150	Kif22
				10594251	Kif23
				10515431	Kif2c
				10601011	Kif4
				10525591	Kntc1
				10550102	Lig1
				10538832	Mad2l1
				10480432	Mastl
				10353420	Mcm3
				10437945	Mcm4
				10572906	Mcm5
				10534974	Mcm7
				10485070	Mdk
				10504470	Melk
				10568714	Mki67
				10547943	Ncapd2
				10521731	Ncapg
				10399087	Ncapg2
				10487340	Ncaph
				10452709	Ndc80
				10578690	Neil3
				10493114	Nes
				10413710	Nt5dc2
				10359890	Nuf2
				10537246	Nup205
				10474984	Nusap1
				10573615	Orc6l
				10393823	P4hb
				10416037	Pbk
				10557156	Plk1
				10491805	Plk4
				10365574	Pmch
				10499366	Pmf1
				10605674	Pola1
				10524169	Pole
				10400649	Pole2
				10435581	Polq
				10396068	Ppil5
				10463517	Pprc1
				10554445	Prc1
				10607475	Prdx4
				10367076	Prim1
				10453715	Rab18
				10432511	Racgap1
				10546834	Rad18
				10474902	Rad51
				10515257	Rad54l
				10480057	Rbm17
				10368486	Rnf146
				10436519	Robo1
				10555695	Rrm1
				10394978	Rrm2
				10367746	Sash1
				10495574	Sass6
				10523281	Sept11
				10355984	Serpine2
				10451805	Sgol1
				10346365	Sgol2
				10576883	Shcbp1
				10459755	Ska1
				10504957	Smc2
				10492558	Smc4
				10379127	Spag5
				10591556	Spc24
				10483401	Spc25
				10374455	Spred2
				10374464	Spred2
				10507112	Stil
				10521090	Tacc3
				10586184	Tipin
				10430510	Tmem184b
				10390707	Top2a
				10588294	Topbp1
				10477187	Tpx2
				10587508	Ttk
				10528915	Tyms
				10478572	Ube2c
				10359851	Uck2
				10446074	Uhrf1
				10398173	Vrk1
				10475362	Wdr76
				10556266	Wee1
				10346878	Zdbf2
				10594426	Zwilch
E11.5 interstitium/stroma enriched
♂+♀		♂		♀
Transcript cluster ID	Gene name	Transcript cluster ID	Gene name	Transcript cluster ID	Gene name
10544837	1200009O22Rik	10505132	Akap2	10427862	Cdh6
10483800	1700109F18Rik	10453759	Gm10554	10533401	Cux2
10388042	6330403K07Rik	10446771	Lclat1
10483803	6720416L17Rik	10564713	Mfge8
10584561	9030425E11Rik
10536635	A430107O13Rik
10603066	Ace2
10538482	Adcyap1r1
10599001	Agtr2
10439895	Alcam
10586865	Aldh1a2
10372145	Alx1
10569618	Ano1
10545974	Antxr1
10454235	Asxl3
10464251	Atrnl1
10554129	B130024G19Rik
10434291	B3gnt5
10369844	Bicc1
10389929	Cacna1g
10537184	Cald1
10404913	Cap2
10607143	Capn6
10548105	Ccnd2
10460541	Cd248
10581013	Cdh11
10527940	Cdk14
10411709	Cdk7
10502552	Clca1
10502565	Clca2
10551852	Clip3
10512279	Cntfr
10540333	Cntn6
10380419	Col1a1
10536220	Col1a2
10346015	Col3a1
10493108	Crabp2
10485117	Creb3l1
10541075	Cxcl12
10453057	Cyp1b1
10451679	Daam2
10365974	Dcn
10359929	Ddr2
10398319	Dlk1
10359504	Dnm3os
10579812	Ednra
10452419	Efna5
10363224	Fabp7
10425945	Fbln1
10487040	Fbn1
10458999	Fbn2
10603099	Figf
10605256	Flna
10536845	Flnc
10523376	Fras1
10514088	Frem1
10562211	Fxyd1
10381603	Fzd2
10427402	Ghr
10531944	Gm10047
10465916	Gm98
10468533	Gpam
10604576	Gpc3
10498952	Gucy1a3
10565193	Hdgfrp3
10519857	Hgf
10472958	Hoxd10
10472970	Hoxd4
10472962	Hoxd9
10356084	Irs1
10594044	Islr
10480090	Itga8
10439138	Kalrn
10352152	Kif26b
10446473	Lama1
10446763	Lbh
10494445	Lix1l
10513256	Lpar1
10373223	Lrp1
10519998	Lrrc17
10474096	Lrrc4c
10559207	Lsp1
10365983	Lum
10459611	Mc2r
10458731	Mcc
10485070	Mdk
10486041	Meis2
10376778	Mfap4
10503448	Mmp16
10511180	Mxra8
10377319	Myh10
10384044	Myl7
10593293	Ncam1
10585180	Ncam1
10421100	Nefm
10573779	Nkd1
10564527	Nr2f2
10601942	Nrk
10529656	Nsg1
10415408	Nynrin
10578649	Odz3
10554969	Odz4
10556076	Olfml1
10578829	Palld
10534862	Pcolce
10542575	Pde3a
10522503	Pdgfra
10456046	Pdgfrb
10469457	Plxdc2
10492021	Postn
10578989	Psd3
10543959	Ptn
10452047	Ptprs
10544573	Rarres2
10506254	Raver2
10597531	Rbms3
10563077	Rcn3
10344952	Rdh10
10504424	Reck
10351463	Rgs5
10351455	Rgs5
10482500	Rnd3
10506201	Ror1
10405179	S1pr3
10451763	Satb1
10519886	Sema3c
10519747	Sema3e
10570957	Sfrp1
10492798	Sfrp2
10522288	Shisa3
10476740	Slc24a3
10521759	Slit2
10528664	Smarcd3
10433776	Snai2
10429160	St3gal1
10564624	St8sia2
10389797	Stxbp4
10494372	Sv2a
10513208	Svep1
10368240	Tcf21
10346150	Tmeff2
10379489	Tmem98
10513739	Tnc
10512499	Tpm2
10478928	Tshz2
10543306	Tspan12
10395320	Twist1
10496519	Unc5c
10526441	Upk3b
10598933	Usp11
10410931	Vcan
10462281	Vldlr
10413482	Wnt5a
10559964	Zik1
E11.5 interstitium/stroma depleted
♂+♀		♂		♀
Transcript cluster ID	Gene name	Transcript cluster ID	Gene name	Transcript cluster ID	Gene name
---		---		---
E12.5 interstitium/stroma enriched
♂+♀		♂		♀
Transcript cluster ID	Gene name	Transcript cluster ID	Gene name	Transcript cluster ID	Gene name
10483800	1700109F18Rik	10419416	3632451O06Rik	10599581	2610018G03Rik
10388042	6330403K07Rik	10536635	A430107O13Rik	10464251	Atrnl1
10584561	9030425E11Rik	10565712	Acer3	10427862	Cdh6
10603066	Ace2	10375751	Adamts2	10493108	Crabp2
10439895	Alcam	10440534	Adamts5	10427280	Hoxc10
10554129	B130024G19Rik	10505143	Akap2	10355500	Igfbp5
10389929	Cacna1g	10505132	Akap2	10474096	Lrrc4c
10519815	Cacna2d1	10357833	Atp2b4	10446928	Ltbp1
10460541	Cd248	10600169	Bgn	10521796	Mir218-1
10357488	Cd55	10369842	Bicc1	10523161	Mthfd2l
10581013	Cdh11	10369844	Bicc1	10377148	Myh8
10551852	Clip3	10494804	Casq2	10573779	Nkd1
10512279	Cntfr	10580469	Cbln1	10492689	Pdgfc
10380419	Col1a1	10502552	Clca1	10359624	Prrx1
10536220	Col1a2	10502565	Clca2	10351463	Rgs5
10346015	Col3a1	10485117	Creb3l1	10476740	Slc24a3
10356520	Col6a3	10396270	Dact1	10405587	Tgfbi
10371400	Cry1	10578241	Dlc1	10349529	Thsd7b
10453057	Cyp1b1	10368647	Dse
10373073	D10Ertd610e	10579812	Ednra
10365974	Dcn	10452419	Efna5
10481592	Dnm1	10427496	Egflam
10605811	Fam123b	10502081	Enpep
10517967	Fblim1	10404152	Fam65b
10425945	Fbln1	10591123	Fat3
10562211	Fxyd1	10591118	Fat3
10416340	Gfra2	10591127	Fat3
10604576	Gpc3	10591129	Fat3
10498952	Gucy1a3	10591125	Fat3
10427293	Hoxc6	10591135	Fat3
10399691	Id2	10591131	Fat3
10352152	Kif26b	10591116	Fat3
10446473	Lama1	10591120	Fat3
10446763	Lbh	10591090	Fat3
10373223	Lrp1	10591114	Fat3
10519998	Lrrc17	10487040	Fbn1
10485070	Mdk	10603099	Figf
10486041	Meis2	10362499	Frk
10503448	Mmp16	10484307	Frzb
10511180	Mxra8	10373179	Gli1
10593293	Ncam1	10357137	Gli2
10407420	Net1	10504450	Glipr2
10601942	Nrk	10590663	Gria4
10542575	Pde3a	10519857	Hgf
10522503	Pdgfra	10579894	Hhip
10469457	Plxdc2	10358633	Hmcn1
10543959	Ptn	10358595	Hmcn1
10544573	Rarres2	10358621	Hmcn1
10563077	Rcn3	10358611	Hmcn1
10519886	Sema3c	10358541	Hmcn1
10519693	Sema3d	10472958	Hoxd10
10570957	Sfrp1	10574780	Hsd11b2
10521759	Slit2	10345777	Il1rl2
10433776	Snai2	10403743	Inhba
10406551	Ssbp2	10594044	Islr
10429160	St3gal1	10395394	Ispd
10513208	Svep1	10473125	Itga4
10393559	Timp2	10590031	Itga9
10440019	Tmem45a	10469151	Itih5
10455647	Tnfaip8	10514576	Kank4
10355536	Tns1	10368409	Lama2
10512499	Tpm2	10416215	Loxl2
10428534	Trps1	10559207	Lsp1
10496519	Unc5c	10561212	Ltbp4
10526441	Upk3b	10376778	Mfap4
10385635	Zfp354c	10556381	Mical2
10559964	Zik1	10492355	Mme
		10366994	Myo1a
		10467258	Myof
		10578045	Nrg1
		10548038	Ntf3
		10556076	Olfml1
		10423654	Osr2
		10505120	Palm2
		10489569	Pltp
		10551736	Ppp1r14a
		10487937	Prokr2
		10349922	Ren1
		10440344	Robo2
		10405179	S1pr3
		10483353	Scn7a
		10576883	Shcbp1
		10529515	Sorcs2
		10395389	Sostdc1
		10564624	St8sia2
		10416181	Stc1
		10578574	Stox2
		10578572	Stox2
		10602020	Tbc1d8b
		10368240	Tcf21
		10532085	Tgfbr3
		10488378	Thbd
		10554667	Tmc3
		10346150	Tmeff2
		10362615	Traf3ip2
		10395320	Twist1
		10482448	Zeb2
E12.5 interstitium/stroma depleted
♂+♀		♂		♀
Transcript cluster ID	Gene name	Transcript cluster ID	Gene name	Transcript cluster ID	Gene name
10384656	B3gnt2	10422436	Dock9	---
E12.5 Leydig cell
♂ enriched		♂ depleted
Transcript cluster ID	Gene name	Transcript cluster ID	Gene name
10536635	A430107O13Rik	10428619	Enpp2
10606735	Armcx2
10427436	C7
10580469	Cbln1
10348451	Cxcr7
10585794	Cyp11a1
10468239	Cyp17a1
10502081	Enpep
10591129	Fat3
10591135	Fat3
10593483	Fdx1
10571815	Gpm6a
10464425	Grk5
10579894	Hhip
10500565	Hsd3b1
10590031	Itga9
10488060	Jag1
10459611	Mc2r
10372139	Nts
10423654	Osr2
10489569	Pltp
10423049	Prlr
10487937	Prokr2
10440344	Robo2
10569129	Sct
10473160	Ssfa2
10571054	Star
10532085	Tgfbr3
10513739	Tnc
10501608	Vcam1
E13.5 interstitium/stroma enriched
♂+♀		♂		♀
Transcript cluster ID	Gene name	Transcript cluster ID	Gene name	Transcript cluster ID	Gene name
10544837	1200009O22Rik	10419416	3632451O06Rik	10485982	Actc1
10375751	Adamts2	10483803	6720416L17Rik	10599001	Agtr2
10410408	Adcy2	10584561	9030425E11Rik	10427862	Cdh6
10434291	B3gnt5	10565712	Acer3	10431637	Cpne8
10358339	Cfh	10346882	Adam23	10483081	Fap
10380419	Col1a1	10440534	Adamts5	10399691	Id2
10370180	Col6a2	10479490	Arfgap1	10480090	Itga8
10453057	Cyp1b1	10585286	Arhgap20	10474096	Lrrc4c
10481592	Dnm1	10405047	Aspn	10360504	Mir350
10359504	Dnm3os	10357833	Atp2b4	10553450	Nell1
10536845	Flnc	10366707	Avpr1a	10601569	Pcdh11x
10514088	Frem1	10592420	AW551984	10411782	Pik3r1
10542834	Gm5887	10472436	B3galt1	10359624	Prrx1
10550388	Gng8	10600169	Bgn	10405605	Smad5
10599348	Gria3	10369844	Bicc1	10405587	Tgfbi
[truncated: 5,396 more rows]

## Sheet: (B) Permutation tests
	Permutation test results				Number of genes in the actual list	False positive percentage
Gene lists	Mean number of transcript ID's	Median number of transcript ID's	Mean number of genes	Median number of genes
♂+♀ E11.5 supporting enriched	0.005	0	0.005	0	103	0.00485437
♂ E11.5 supporting enriched	3.335	0	3.265	0	144	2.26736
♀ E11.5 supporting enriched	2.645	0	2.585	0	215	1.20233
♂+♀ E11.5 supporting depleted	0.01	0	0.01	0	83	0.0120482
♂ E11.5 supporting depleted	1.25	0	1.245	0	1	124.5
♀ E11.5 supporting depleted	0.305	0	0.305	0	103	0.296117
♂+♀ E12.5 supporting enriched	0	0	0	0	44	0
♂ E12.5 supporting enriched	4.815	0	4.555	0	484	0.941116
♀ E12.5 supporting enriched	6.235	0	6.09	0	255	2.38824
♂+♀ E12.5 supporting depleted	0	0	0	0	25	0
♂ E12.5 supporting depleted	4.375	0	4.18	0	54	7.74074
♀ E12.5 supporting depleted	1.08	0	0.79	0	163	0.484663
♂+♀ E13.5 supporting enriched	0.025	0	0.025	0	49	0.0510204
♂ E13.5 supporting enriched	1.835	0	1.67	0	491	0.340122
♀ E13.5 supporting enriched	1.705	0	1.695	0	242	0.700413
♂+♀ E13.5 supporting depleted	0	0	0	0	10	0
♂ E13.5 supporting depleted	0.69	0	0.56	0	51	1.09804
♀ E13.5 supporting depleted	6.035	0	5.61	0	173	3.24277
♂+♀ E11.5 interstitium/stroma enriched	0	0	0	0	152	0
♂ E11.5 interstitium enriched	10.99	0	10.78	0	4	269.5
♀ E11.5 stroma enriched	7.66	0	7.46	0	2	373
♂+♀ E11.5 interstitium/stroma depleted	0	0	0	0	0	na
♂ E11.5 interstitium depleted	6.09	0	5.875	0	0	na
♀ E11.5 stroma depleted	1.175	0	1.145	0	0	na
♂+♀ E12.5 interstitium/stroma enriched	0	0	0	0	67	0
♂ E12.5 interstitium enriched	9.105	0	8.835	0	80	11.0438
♂ E12.5 Leydig enriched	0.02	0	0.02	0	18	0.111111
♀ E12.5 stroma enriched	2.485	0	2.455	0	18	13.6389
♂+♀ E12.5 interstitium/stroma depleted	0.015	0	0.01	0	1	1
♂ E12.5 interstitium depleted	0.425	0	0.425	0	1	42.5
♂ E12.5 Leydig depleted	0.02	0	0.02	0	1	2
♀ E12.5 stroma depleted	5.075	0	4.785	0	0	na
♂+♀ E13.5 interstitium/stroma enriched	0	0	0	0	47	0
♂ E13.5 interstitium enriched	8.68	0	8.45	0	130	6.5
♂ E13.5 Leydig enriched	0.01	0	0.01	0	46	0.0217391
♀ E13.5 stroma enriched	23.28	0	22.49	0	15	149.933
♂+♀ E13.5 interstitium/stroma depleted	0	0	0	0	1	0
♂ E13.5 interstitium depleted	5.295	0	5.095	0	8	63.6875
♂ E13.5 Leydig depleted	0	0	0	0	3	0
♀ E13.5 stroma depleted	0.94	0	0.94	0	0	na
♂+♀ E11.5 germ enriched	0	0	0	0	1023	0
♂ E11.5 germ enriched	1.32	0	1.3	0	15	8.66667
♀ E11.5 germ enriched	0.835	0	0.825	0	25	3.3
♂+♀ E11.5 germ depleted	0	0	0	0	571	0
♂ E11.5 germ depleted	0.985	0	0.98	0	2	49
♀ E11.5 germ depleted	2.18	0	2.15	0	8	26.875
♂+♀ E12.5 germ enriched	0.005	0	0.005	0	832	0.000600962
♂ E12.5 germ enriched	3.73	0	3.53	0	107	3.29907
♀ E12.5 germ enriched	4.97	0	4.77	0	112	4.25893
♂+♀ E12.5 germ depleted	0	0	0	0	465	0
♂ E12.5 germ depleted	1.015	0	0.825	0	87	0.948276
♀ E12.5 germ depleted	2.545	0	2.425	0	32	7.57812
♂+♀ E13.5 germ enriched	0.005	0	0.005	0	489	0.00102249
♂ E13.5 germ enriched	5.585	0	5.41	0	433	1.24942
♀ E13.5 germ enriched	11.515	0	11.105	0	425	2.61294
♂+♀ E13.5 germ depleted	0	0	0	0	397	0
♂ E13.5 germ depleted	3.54	0	3.385	0	231	1.46537
♀ E13.5 germ depleted	1.04	0	1.035	0	196	0.528061
♂+♀ E11.5 endothelial enriched	0.005	0	0.005	0	349	0.00143266
♂ E11.5 endothelial enriched	7.85	0	7.665	0	8	95.8125
♀ E11.5 endothelial enriched	0.95	0	0.945	0	9	10.5
♂+♀ E11.5 endothelial depleted	0	0	0	0	114	0
♂ E11.5 endothelial depleted	7.925	0	7.48	0	3	249.333
♀ E11.5 endothelial depleted	4.28	0	3.95	0	3	131.667

## Sheet: (C) Pathways
E11.5 ♂+♀ supporting cell enriched
Category	Term	Transcript cluster IDs	p-value
KEGG	Neuroactive ligand-receptor interaction	10503947, 10525439, 10352969, 10560945	0.0290341
E11.5 ♂+♀ supporting cell depleted
Category	Term	Transcript cluster IDs	p-value
BioCarta	Role of Ran in mitotic spindle regulation	10590494, 10490104	0.043789
KEGG	Cell cycle	10438378, 10515744, 10594774, 10528077, 10538832, 10572906	0.000203852
KEGG	Oocyte meiosis	10515744, 10594774, 10490104, 10538832	0.0106748
E11.5 ♂ supporting cell enriched
Category	Term	Transcript cluster IDs	p-value
KEGG	Metabolism of xenobiotics by cytochrome P450	10501229, 10501199, 10501208, 10496438, 10501222	0.000482785
KEGG	Drug metabolism	10501229, 10501199, 10501208, 10496438, 10501222	0.00056419
KEGG	Glutathione metabolism	10501229, 10501199, 10501208, 10605338, 10501222	0.00323015
E11.5 ♀ supporting cell enriched
Category	Term	Transcript cluster IDs	p-value
KEGG	Arrhythmogenic right ventricular cardiomyopathy (ARVC)	10418355, 10469404, 10407598, 10433887, 10457686	0.0259773
E11.5 ♀ supporting cell depleted
Category	Term	Transcript cluster IDs	p-value
KEGG	Cell cycle	10353420, 10458195, 10592201, 10557156, 10369815, 10487480, 10587508, 10556266, 10497831	2.88313e-05
BioCarta	cdc25 and chk1 Regulatory Pathway in response to DNA damage	10458195, 10592201, 10369815, 10556266	6.30279e-05
BioCarta	Cell Cycle: G2/M Checkpoint	10458195, 10592201, 10557156, 10369815, 10556266	0.000206189
BioCarta	RB Tumor Suppressor/Checkpoint Signaling in response to DNA damage	10458195, 10592201, 10369815, 10556266	0.000364282
KEGG	Progesterone-mediated oocyte maturation	10458195, 10557156, 10369815, 10487480, 10497831	0.00801452
KEGG	One carbon pool by folate	10406581, 10396610, 10545672	0.0105525
E12.5 ♂+♀ supporting cell enriched
Category	Term	Transcript cluster IDs	p-value
KEGG	Arginine and proline metabolism	10377560, 10370766, 10533345	0.00422586
E12.5 ♂+♀ supporting cell depleted
Category	Term	Transcript cluster IDs	p-value
KEGG	Regulation of actin cytoskeleton	10570982, 10558345, 10355403	0.0413494
E12.5 ♂ supporting cell enriched
Category	Term	Transcript cluster IDs	p-value
KEGG	Lysosome	10569319, 10493435, 10600377, 10573583, 10460468, 10376208, 10585874, 10587733, 10589889, 10509127, 10577882, 10507784, 10496302, 10409345, 10495285, 10363430	7.14461e-05
KEGG	Other glycan degradation	10493435, 10496302, 10573583, 10585874, 10589889, 10509127	0.000341057
KEGG	Calcium signaling pathway	10413726, 10380896, 10355278, 10525439, 10420957, 10557177, 10462922, 10437364, 10557165, 10486119, 10373467, 10533483	0.00662771
KEGG	Arrhythmogenic right ventricular cardiomyopathy (ARVC)	10586079, 10454172, 10596893, 10588592, 10404649, 10435305, 10363676, 10533483	0.01423
KEGG	Pyruvate metabolism	10384603, 10537169, 10537146, 10351414, 10458960, 10477649	0.0183125
KEGG	Pantothenate and CoA biosynthesis	10368289, 10553015, 10362138, 10510957	0.0219632
KEGG	Glycerolipid metabolism	10441740, 10537169, 10572130, 10537146, 10351414, 10458960	0.0268863
KEGG	Metabolism of xenobiotics by cytochrome P450	10587315, 10501199, 10501208, 10501222, 10561128	0.0389672
KEGG	Melanogenesis	10422249, 10420846, 10544002, 10557177, 10534426, 10437364, 10486119, 10594447	0.04152
KEGG	Glycolysis / Gluconeogenesis	10369541, 10510546, 10351414, 10458960, 10384015, 10477649	0.041776
BioCarta	Role of ERBB2 in Signal Transduction and Oncology	10380896, 10355278, 10594447, 10373467	0.0437582
BioCarta	CXCR4 Signaling Pathway	10420957, 10581890, 10557177, 10594447	0.0437582
E12.5 ♂ supporting cell depleted
Category	Term	Transcript cluster IDs	p-value
KEGG	Chemokine signaling pathway	10555118, 10377804, 10476443, 10544219	0.0192232
E12.5 ♀ supporting cell enriched
Category	Term	Transcript cluster IDs	p-value
KEGG	Fatty acid metabolism	10504606, 10387768, 10460157, 10431564, 10355246, 10528929	0.00176924
KEGG	PPAR signaling pathway	10450038, 10460157, 10494643, 10431564, 10425987, 10355246	0.00522882
KEGG	Neuroactive ligand-receptor interaction	10508052, 10453487, 10474002, 10404376, 10522324, 10560945	0.0276409
KEGG	Calcium signaling pathway	10453487, 10549282, 10418355, 10484283, 10407598, 10524909, 10404376	0.0350163
E12.5 ♀ supporting cell depleted
Category	Term	Transcript cluster IDs	p-value
KEGG	Cell cycle	10503264, 10438378, 10557156, 10474769, 10369815, 10487480, 10497831, 10538832, 10572906, 10353420, 10524266, 10458195, 10515744, 10587508, 10594774, 10528077	3.96639e-12
KEGG	Oocyte meiosis	10503264, 10451805, 10458195, 10515744, 10557156, 10369815, 10594774, 10487480, 10490104, 10538832	1.91032e-06
KEGG	DNA replication	10353420, 10465282, 10367076, 10533090, 10465912, 10524169, 10572906	3.97393e-06
KEGG	Progesterone-mediated oocyte maturation	10458195, 10557156, 10369815, 10594774, 10487480, 10497831, 10538832	0.00029369
KEGG	p53 signaling pathway	10524266, 10503264, 10394978, 10369815, 10594774	0.00500523
BioCarta	Role of Ran in mitotic spindle regulation	10477187, 10590494, 10490104	0.00804073
KEGG	Homologous recombination	10564978, 10474902, 10515257	0.0399285
KEGG	Base excision repair	10465912, 10578690, 10524169	0.0399285
BioCarta	Cell Cycle: G2/M Checkpoint	10458195, 10557156, 10369815	0.042058
E13.5 ♂+♀ supporting cell enriched
Category	Term	Transcript cluster IDs	p-value
KEGG	Arginine and proline metabolism	10377560, 10370766, 10386652	0.00833331
E13.5 ♂+♀ supporting cell depleted
Category	Term	Transcript cluster IDs	p-value
KEGG	Arginine and proline metabolism	10350753, 10402708	0.0300077
E13.5 ♂ supporting cell enriched
Category	Term	Transcript cluster IDs	p-value
KEGG	Calcium signaling pathway	10413726, 10525439, 10420957, 10557177, 10437364, 10557165, 10366004, 10380896, 10355278, 10462922, 10573210, 10486119, 10373467	0.00127007
KEGG	MAPK signaling pathway	10412100, 10357579, 10604751, 10548735, 10401673, 10595979, 10588592, 10415651, 10557177, 10557165, 10441565, 10443408, 10595981, 10385036, 10444056, 10517655, 10594447, 10535043	0.0161244
KEGG	Glycerolipid metabolism	10441740, 10537169, 10572130, 10537146, 10351414, 10464328	0.0209771
KEGG	Amino sugar and nucleotide sugar metabolism	10358879, 10545588, 10512640, 10354258, 10593937, 10585874	0.0209771
BioCarta	Links between Pyk2 and Map Kinases	10412100, 10420957, 10581890, 10557177, 10594447	0.024398
BioCarta	Stress Induction of HSP Regulation	10357579, 10444056, 10544687	0.0257515
KEGG	Tight junction	10595979, 10545538, 10506883, 10557177, 10436666, 10491313, 10442327, 10363676, 10447294, 10569569, 10595981	0.0329758
BioCarta	Map Kinase Inactivation of SMRT Corepressor	10412100, 10594447, 10381082	0.0350519
KEGG	Leukocyte transendothelial migration	10545538, 10420957, 10581890, 10557177, 10436666, 10491313, 10442327, 10363676, 10443408	0.038351
BioCarta	Keratinocyte Differentiation	10412100, 10444056, 10557177, 10594447, 10443408	0.0437871
E13.5 ♂ supporting cell depleted
Category	Term	Transcript cluster IDs	p-value
KEGG	Melanogenesis	10432190, 10522530, 10496091	0.0162817
KEGG	Pathways in cancer	10419261, 10522530, 10568436, 10496091	0.0371329
E13.5 ♀ supporting cell enriched
Category	Term	Transcript cluster IDs	p-value
KEGG	Butanoate metabolism	10504606, 10494643, 10556769, 10528929	0.0157011
E13.5 ♀ supporting cell depleted
Category	Term	Transcript cluster IDs	p-value
KEGG	Cell cycle	10534974, 10438378, 10557156, 10474769, 10369815, 10487480, 10497831, 10381072, 10538832, 10572906, 10353420, 10458195, 10515744, 10437945, 10592201, 10573615, 10556266, 10587508, 10594774, 10528077	1.7609e-15
KEGG	DNA replication	10353420, 10534974, 10605674, 10437945, 10367076, 10524169, 10400649, 10572906, 10550102	3.66109e-08
KEGG	Oocyte meiosis	10451805, 10458195, 10515744, 10361375, 10557156, 10369815, 10594774, 10487480, 10490104, 10538832	1.09644e-05
BioCarta	cdc25 and chk1 Regulatory Pathway in response to DNA damage	10458195, 10592201, 10369815, 10556266	0.000148177
KEGG	Pyrimidine metabolism	10359851, 10605674, 10394978, 10367076, 10555695, 10524169, 10528915, 10400649	0.000274583
BioCarta	Cell Cycle: G2/M Checkpoint	10458195, 10592201, 10557156, 10369815, 10556266	0.000641036
BioCarta	RB Tumor Suppressor/Checkpoint Signaling in response to DNA damage	10458195, 10592201, 10369815, 10556266	0.000843665
KEGG	Progesterone-mediated oocyte maturation	10458195, 10557156, 10369815, 10594774, 10487480, 10497831, 10538832	0.000880649
KEGG	Base excision repair	10578690, 10524169, 10400649, 10550102	0.00647374
BioCarta	Role of Ran in mitotic spindle regulation	10477187, 10590494, 10490104	0.0136979
KEGG	Purine metabolism	10605674, 10394978, 10367076, 10555695, 10524169, 10400649	0.0451109
E11.5 ♂+♀ interstitium/stroma enriched
Category	Term	Transcript cluster IDs	p-value
KEGG	Focal adhesion	10346015, 10605256, 10384044, 10480090, 10519857, 10380419, 10548105, 10536220, 10603099, 10446473, 10513739, 10536845, 10522503, 10456046	2.59139e-06
KEGG	ECM-receptor interaction	10536220, 10346015, 10480090, 10446473, 10494372, 10380419, 10513739	0.000249494
KEGG	Neuroactive ligand-receptor interaction	10405179, 10427402, 10599001, 10538482, 10459611, 10513256, 10579812	0.00123838
KEGG	Cytokine-cytokine receptor interaction	10541075, 10603099, 10427402, 10512279, 10519857, 10522503, 10456046	0.00837904
KEGG	Axon guidance	10452419, 10541075, 10521759, 10519886, 10496519, 10474096, 10519747	0.0118467
KEGG	Wnt signaling pathway	10570957, 10492798, 10573779, 10451679, 10548105, 10413482, 10381603	0.0176643
E12.5 ♂+♀ interstitium/stroma enriched
Category	Term	Transcript cluster IDs	p-value
KEGG	ECM-receptor interaction	10536220, 10346015, 10446473, 10380419	0.00761142
KEGG	Focal adhesion	10536220, 10346015, 10446473, 10380419, 10522503	0.0359707
E12.5 ♂ interstitium & Leydig cell enriched
Category	Term	Transcript cluster IDs	p-value
KEGG	Steroid hormone biosynthesis	10500565, 10574780, 10585794, 10468239	0.0008112
KEGG	Neuroactive ligand-receptor interaction	10405179, 10423049, 10590663, 10459611, 10579812	0.00641168
KEGG	Renin-angiotensin system	10349922, 10492355, 10502081	0.00865241
KEGG	ECM-receptor interaction	10368409, 10473125, 10513739, 10590031	0.0181735
KEGG	Focal adhesion	10368409, 10473125, 10603099, 10519857, 10513739, 10590031	0.0282549
KEGG	Hedgehog signaling pathway	10357137, 10373179, 10579894	0.0439242
E13.5 ♂+♀ interstitium/stroma enriched
Category	Term	Transcript cluster IDs	p-value
BioCarta	Inhibition of Matrix Metalloproteinases	10573924, 10393559	0.0172199
E13.5 ♂ interstitium & Leydig cell enriched
Category	Term	Transcript cluster IDs	p-value
KEGG	Neuroactive ligand-receptor interaction	10437629, 10496192, 10476886, 10453487, 10405179, 10423049, 10590663, 10459611, 10423030, 10366707	8.53144e-05
KEGG	Hypertrophic cardiomyopathy (HCM)	10569714, 10403229, 10519815, 10368409, 10473125, 10453233, 10512499, 10590031	0.000147989
KEGG	Dilated cardiomyopathy	10569714, 10403229, 10519815, 10368409, 10473125, 10453233, 10512499, 10590031	0.00026997
KEGG	Steroid hormone biosynthesis	10500565, 10574780, 10585794, 10468239, 10359917	0.000409636
KEGG	Arrhythmogenic right ventricular cardiomyopathy (ARVC)	10569714, 10403229, 10519815, 10368409, 10473125, 10453233, 10590031	0.000948882
KEGG	Calcium signaling pathway	10357833, 10437629, 10461856, 10496192, 10453487, 10453233, 10366707, 10522503, 10456046	0.00102819
KEGG	Focal adhesion	10403229, 10346015, 10368409, 10473125, 10603099, 10519857, 10401607, 10370210, 10590031, 10522503, 10456046	0.00174844
KEGG	Hedgehog signaling pathway	10410039, 10357137, 10373179, 10579894, 10413482	0.00372453
KEGG	ECM-receptor interaction	10403229, 10346015, 10368409, 10473125, 10370210, 10590031	0.00440386
KEGG	Basal cell carcinoma	10410039, 10357137, 10373179, 10579894, 10413482	0.00609512
BioCarta	Sonic Hedgehog (Shh) Pathway	10410039, 10357137, 10373179	0.0134284
KEGG	Cytokine-cytokine receptor interaction	10541075, 10603099, 10423049, 10519857, 10423030, 10403743, 10522503, 10456046	0.0196336
KEGG	Cardiac muscle contraction	10569714, 10519815, 10453233, 10512499, 10560919	0.0284656
KEGG	Renin-angiotensin system	10349922, 10502081, 10603066	0.0307758
KEGG	Steroid biosynthesis	10578916, 10527920, 10359917	0.0411749
KEGG	Androgen and estrogen metabolism	10500565, 10574780, 10359917	0.0411749
KEGG	Cell adhesion molecules (CAMs)	10403229, 10473125, 10501608, 10397575, 10590031	0.0432265
KEGG	Pathways in cancer	10368409, 10410039, 10603099, 10357137, 10373179, 10519857, 10401607, 10579894, 10522503, 10413482, 10456046	0.0498806
E11.5 ♂+♀ germ cell enriched
Category	Term	Transcript cluster IDs	p-value
BioCarta	Role of BRCA1, BRCA2 and ATR in Cancer Susceptibility	10524266, 10385842, 10592201, 10587892, 10593526, 10391461, 10423068, 10527801, 10540738, 10474902, 10582501, 10583264	5.52359e-09
KEGG	DNA replication	10534974, 10415791, 10546163, 10562818, 10438690, 10508759, 10524169, 10395049, 10572906, 10388409, 10550102, 10353420, 10367076, 10543114, 10363575, 10353032	5.68933e-08
KEGG	Homologous recombination	10389627, 10562818, 10508759, 10388409, 10543114, 10385842, 10527801, 10564978, 10433910, 10474902, 10583264, 10515257, 10353032	4.31293e-07
KEGG	Mismatch repair	10352048, 10543114, 10562818, 10447417, 10438690, 10508759, 10447395, 10388409, 10353032, 10550102	8.89781e-05
BioCarta	ATM Signaling Pathway	10524266, 10385842, 10592201, 10593526, 10391461, 10474902, 10583264, 10388409	0.000129618
KEGG	Cell cycle	10406482, 10534974, 10427166, 10587892, 10431182, 10546163, 10474769, 10487480, 10381072, 10538832, 10572906, 10523802, 10524266, 10353420, 10364950, 10515744, 10592201, 10593526, 10587508, 10562563, 10528077	0.000300374
KEGG	Non-homologous end-joining	10347232, 10385842, 10410947, 10425632, 10355711, 10583264	0.00079472
KEGG	Pyrimidine metabolism	10475610, 10418131, 10520650, 10374793, 10562818, 10524169, 10571752, 10410877, 10476691, 10367076, 10475965, 10370708, 10365355, 10421351, 10400391	0.00283038
KEGG	RNA polymerase	10476691, 10418131, 10475965, 10421351, 10370708, 10365355, 10400391, 10410877	0.00331723
KEGG	Nucleotide excision repair	10406482, 10543114, 10562818, 10454564, 10438690, 10524169, 10508759, 10388409, 10353032, 10550102	0.0126389
KEGG	p53 signaling pathway	10524266, 10483851, 10364950, 10563303, 10592201, 10587892, 10593526, 10562563, 10607747, 10426016	0.0174996
KEGG	One carbon pool by folate	10386604, 10396610, 10545672, 10347193, 10588883	0.0181758
KEGG	Glutathione metabolism	10495763, 10521709, 10501218, 10544906, 10588899, 10587266, 10510391, 10571274	0.033585
KEGG	Purine metabolism	10418131, 10374793, 10562818, 10524169, 10530806, 10347193, 10471474, 10469070, 10410877, 10476691, 10367076, 10475965, 10370708, 10365355, 10421351, 10400391	0.040549
E11.5 ♂+♀ germ cell depleted
Category	Term	Transcript cluster IDs	p-value
KEGG	Focal adhesion	10400718, 10357043, 10495416, 10536499, 10365559, 10581890, 10425852, 10548105, 10435676, 10360806, 10362596, 10514466, 10500976, 10411782, 10380896, 10390117, 10472820, 10435305, 10556426, 10537770	0.000439005
KEGG	Apoptosis	10411782, 10357043, 10541895, 10589087, 10346562, 10571696, 10496338, 10404506, 10382284, 10360806, 10346564	0.00226459
KEGG	Axon guidance	10464754, 10458843, 10576639, 10503659, 10431424, 10475544, 10435676, 10372028, 10362596, 10372891, 10352867, 10496338, 10575160, 10436519	0.00354395
KEGG	Arrhythmogenic right ventricular cardiomyopathy (ARVC)	10454786, 10457644, 10464084, 10391103, 10390117, 10472820, 10435305, 10363173, 10530633	0.0065041
KEGG	Toll-like receptor signaling pathway	10478048, 10411782, 10514466, 10344966, 10367728, 10436849, 10404506, 10436830, 10397346, 10346564	0.00764345
KEGG	Colorectal cancer	10400718, 10411782, 10357043, 10514466, 10594404, 10464084, 10424400, 10571696, 10435676, 10418251, 10397346	0.0109983
BioCarta	TSP-1 Induced Apoptosis in Microvascular Endothelial Cell	10362596, 10514466, 10571696, 10397346	0.0114478
BioCarta	Inhibition of Matrix Metalloproteinases	10504424, 10365482, 10393559, 10415052	0.0114478
KEGG	Pathways in cancer	10400718, 10357043, 10514668, 10424400, 10365559, 10435676, 10346564, 10454786, 10514466, 10411782, 10476395, 10594404, 10380896, 10464084, 10391103, 10390117, 10472820, 10391301, 10571696, 10418251, 10397346, 10366052, 10542310	0.0151448
KEGG	B cell receptor signaling pathway	10400718, 10411782, 10559261, 10495416, 10514466, 10496338, 10435676, 10575160, 10397346	0.0157474
BioCarta	Control of skeletal myogenesis by HDAC & calcium/calmodulin-dependent kinase (CaMK)	10411782, 10564451, 10576696, 10365559, 10496338	0.0164595
KEGG	Natural killer cell mediated cytotoxicity	10400718, 10362596, 10411782, 10495416, 10436849, 10571696, 10496338, 10436830, 10575160	0.0295759
BioCarta	IL-7 Signal Transduction	10362596, 10411782, 10357043, 10514668	0.0333227
KEGG	Lysosome	10534102, 10473847, 10430834, 10423593, 10467139, 10367436, 10381187, 10410124, 10415844, 10587733, 10604187	0.0369166
KEGG	Dilated cardiomyopathy	10490203, 10390117, 10365559, 10572747, 10472820, 10512499, 10435305, 10530633	0.0378151
BioCarta	IL-2 Receptor Beta Chain in T cell Activation	10411782, 10357043, 10514668, 10424400, 10346562, 10397346	0.0393637
E12.5 ♂+♀ germ cell enriched
Category	Term	Transcript cluster IDs	p-value
BioCarta	Role of BRCA1, BRCA2 and ATR in Cancer Susceptibility	10524266, 10385842, 10587892, 10593526, 10391461, 10411690, 10423068, 10540738, 10474902, 10582501	6.06619e-08
KEGG	Homologous recombination	10389627, 10543114, 10385842, 10562818, 10433910, 10564978, 10474902, 10515257, 10388409, 10396849, 10353032	9.05181e-06
KEGG	DNA replication	10415791, 10534974, 10605674, 10367076, 10543114, 10546163, 10562818, 10438690, 10524169, 10572906, 10388409, 10353032	3.33295e-05
KEGG	Cell cycle	10534974, 10427166, 10438378, 10433797, 10421526, 10587892, 10546163, 10354845, 10487480, 10482467, 10572906, 10463951, 10523802, 10524266, 10593526, 10556266, 10587508, 10562563, 10528077	0.000276749
BioCarta	ATM Signaling Pathway	10524266, 10385842, 10593526, 10391461, 10474902, 10388409	0.00142882
KEGG	Mismatch repair	10352048, 10543114, 10527268, 10562818, 10447417, 10438690, 10388409, 10353032	0.00160015
KEGG	Non-homologous end-joining	10433797, 10385842, 10410947, 10425632, 10355711	0.00387079
BioCarta	Cell Cycle: G2/M Checkpoint	10433797, 10587892, 10593526, 10364455, 10391461, 10556266	0.00398675
KEGG	Pyrimidine metabolism	10515943, 10418131, 10475610, 10520650, 10434523, 10562818, 10524169, 10500362, 10410877, 10425257, 10605674, 10367076, 10400391, 10526482	0.005049
KEGG	RNA degradation	10572449, 10593740, 10551173, 10444595, 10347386, 10412177, 10491551, 10590549, 10536595, 10437778	0.00676121
KEGG	Purine metabolism	10387222, 10418131, 10434523, 10562818, 10524169, 10530806, 10471474, 10469070, 10500362, 10410877, 10425257, 10605674, 10367076, 10400391, 10526482, 10425461	0.0220053
KEGG	RNA polymerase	10425257, 10418131, 10434523, 10400391, 10526482, 10500362, 10410877	0.0267628
BioCarta	Cell Cycle: G1/S Check Point	10421526, 10406581, 10587892, 10593526, 10562563	0.0270405
KEGG	Aminoacyl-tRNA biosynthesis	10359386, 10355931, 10573434, 10500218, 10373157, 10357454, 10444605	0.0407649
E12.5 ♂+♀ germ cell depleted
Category	Term	Transcript cluster IDs	p-value
BioCarta	Inhibition of Matrix Metalloproteinases	10504424, 10365482, 10415052, 10598976	0.00727909
KEGG	Colorectal cancer	10554094, 10411782, 10357043, 10514466, 10504817, 10464084, 10424400, 10435676, 10397346	0.0156417
KEGG	Lysosome	10534102, 10473847, 10430834, 10401968, 10381187, 10410124, 10415844, 10587733, 10589889, 10604187	0.0163932
KEGG	Focal adhesion	10554094, 10357043, 10605256, 10548105, 10435676, 10362596, 10411782, 10514466, 10380896, 10512514, 10472820, 10362538, 10537770	0.0192622
KEGG	ErbB signaling pathway	10411782, 10514466, 10380896, 10424400, 10579925, 10435676, 10495896, 10542310	0.0226129
KEGG	Axon guidance	10372891, 10362596, 10458843, 10420988, 10431424, 10596704, 10585778, 10475544, 10496338, 10435676	0.0237935
KEGG	Glycosphingolipid biosynthesis	10434291, 10460513, 10440099, 10549162	0.0333305
BioCarta	Signaling Pathway from G-Protein Families	10514466, 10461844, 10479112, 10496338, 10397346	0.0339841
BioCarta	Neuropeptides VIP and PACAP inhibit the apoptosis of activated T cells	10461844, 10424400, 10496338, 10363735	0.0363639
KEGG	Glycosphingolipid biosynthesis	10430834, 10429160, 10549162	0.042761
KEGG	Pathways in cancer	10554094, 10357043, 10424400, 10357158, 10435676, 10346564, 10411782, 10514466, 10504817, 10380896, 10464084, 10391103, 10472820, 10362538, 10397346, 10366052, 10542310	0.0450781
KEGG	Toll-like receptor signaling pathway	10411782, 10514466, 10344966, 10367728, 10436830, 10397346, 10346564	0.0468168
KEGG	Melanogenesis	10461844, 10464084, 10596704, 10479112, 10435676, 10495896, 10366052	0.0468168
E12.5 ♂ germ cell enriched
Category	Term	Transcript cluster IDs	p-value
KEGG	Glycerophospholipid metabolism	10486403, 10373542, 10389738	0.0491946
E12.5 ♀ germ cell enriched
Category	Term	Transcript cluster IDs	p-value
KEGG	Calcium signaling pathway	10461856, 10606102, 10595753, 10465521, 10602925	0.0118766
E13.5 ♂+♀ germ cell enriched
Category	Term	Transcript cluster IDs	p-value
KEGG	Pyrimidine metabolism	10522716, 10476691, 10515943, 10468253, 10520650, 10387588, 10539933, 10523012, 10565862, 10571752, 10410877	0.0005936
KEGG	Cell cycle	10534974, 10438378, 10427166, 10421526, 10433797, 10546163, 10354845, 10487480, 10538832, 10524266, 10515744, 10587508, 10594774	0.00073953
BioCarta	FAS signaling pathway ( CD95 )	10555118, 10433797, 10421526, 10506989, 10352242	0.00644217
BioCarta	Telomeres, Telomerase, Cellular Aging, and Immortality	10344939, 10421526, 10387588, 10425632	0.0153335
KEGG	Basal transcription factors	10454077, 10606315, 10452213, 10571288, 10601192	0.0221473
BioCarta	TNFR1 Signaling Pathway	10555118, 10433797, 10421526, 10352242	0.0412126
E13.5 ♂+♀ germ cell depleted
Category	Term	Transcript cluster IDs	p-value
KEGG	Focal adhesion	10357043, 10412562, 10358816, 10378732, 10548105, 10360806, 10411782, 10514466, 10477920, 10380896, 10512514, 10362538, 10590031, 10537770	0.00792144
KEGG	Toll-like receptor signaling pathway	10382300, 10411782, 10514466, 10344966, 10367728, 10404506, 10436830, 10346564	0.0152458
KEGG	Apoptosis	10411782, 10357043, 10502732, 10541895, 10345762, 10404506, 10360806, 10346564	0.0152458
KEGG	MAPK signaling pathway	10357579, 10502732, 10424400, 10412562, 10367728, 10378732, 10538842, 10449284, 10382300, 10388682, 10514466, 10541895, 10427035, 10345762, 10379262	0.0222252
KEGG	Lysosome	10490212, 10534102, 10473847, 10430834, 10363430, 10381187, 10415844, 10587733, 10604187	0.0429296
E13.5 ♂ germ cell enriched
Category	Term	Transcript cluster IDs	p-value
KEGG	RNA polymerase	10451238, 10475965, 10370708, 10365355, 10504518	0.00543215
KEGG	One carbon pool by folate	10407709, 10386604, 10373202, 10347193	0.00559782
KEGG	Pyrimidine metabolism	10374236, 10451238, 10374793, 10475965, 10370708, 10365355, 10504518	0.0210095
KEGG	Purine metabolism	10387222, 10451238, 10374793, 10475965, 10370708, 10365355, 10347193, 10504518	0.0433009
KEGG	Basal transcription factors	10582642, 10458424, 10525766, 10553280	0.0458185
E13.5 ♂ germ cell depleted
Category	Term	Transcript cluster IDs	p-value
KEGG	Focal adhesion	10400718, 10500976, 10605256, 10402766, 10446473, 10395692, 10375634, 10556426, 10588942	0.0203306
BioCarta	Corticosteroids and cardioprotection	10490203, 10402766, 10479112, 10502299	0.0353773
KEGG	Fc epsilon RI signaling pathway	10400718, 10402766, 10555027, 10358434, 10375634	0.045117
BioCarta	Neuropeptides VIP and PACAP inhibit the apoptosis of activated T cells	10461844, 10489253, 10502299	0.0499618
E13.5 ♀ germ cell enriched
Category	Term	Transcript cluster IDs	p-value
BioCarta	Role of BRCA1, BRCA2 and ATR in Cancer Susceptibility	10592201, 10593526, 10527801, 10474902, 10583264	0.000432129
KEGG	p53 signaling pathway	10503264, 10394978, 10592201, 10593526, 10603275, 10562563, 10484999, 10607747	0.00169105
BioCarta	ATM Signaling Pathway	10592201, 10593526, 10474902, 10583264	0.00516579
KEGG	Systemic lupus erythematosus	10408200, 10404127, 10408266, 10404063, 10408077, 10403943	0.00998646
KEGG	Oocyte meiosis	10503264, 10431182, 10446679, 10415332, 10437364, 10526797, 10562563, 10606445	0.031417
KEGG	Cell cycle	10503264, 10431182, 10592201, 10593526, 10603275, 10506822, 10562563, 10381072, 10523802	0.0356736
E13.5 ♀ germ cell depleted
Category	Term	Transcript cluster IDs	p-value
BioCarta	Malate-aspartate shuttle	10384603, 10387922, 10467842	0.000824969
KEGG	Lysosome	10507784, 10567626, 10467139, 10566529, 10478594, 10492699, 10589889	0.00687719
KEGG	Arginine and proline metabolism	10504606, 10487011, 10377560, 10467842	0.0188951
KEGG	Oocyte meiosis	10432190, 10361104, 10540408, 10442155, 10496338, 10441565	0.0255346
KEGG	Tight junction	10351623, 10452639, 10596704, 10442155, 10366814, 10494857	0.0255346
KEGG	Gap junction	10432190, 10540408, 10596704, 10363173, 10494857	0.0328516
KEGG	Chronic myeloid leukemia	10542317, 10459705, 10533285, 10366814, 10494857, 10542310	0.0328516
E11.5 ♂+♀ endothelial cell enriched
Category	Term	Transcript cluster IDs	p-value
KEGG	Cytokine-cytokine receptor interaction	10523134, 10530692, 10506301, 10523156, 10523151, 10389222, 10389231, 10535807, 10597743, 10456071, 10478678, 10361897, 10426999, 10606016, 10597518, 10430660, 10571788, 10375578	1.71379e-07
KEGG	Cell adhesion molecules (CAMs)	10450075, 10583519, 10478678, 10452571, 10364444, 10392177, 10574438, 10584317, 10352905, 10392221	0.000562464
KEGG	Neuroactive ligand-receptor interaction	10473444, 10411229, 10484371, 10601412, 10506301, 10560242, 10416371, 10501586, 10364030, 10422164	0.00119042
KEGG	Chemokine signaling pathway	10523134, 10460968, 10523156, 10523151, 10389222, 10380571, 10389231, 10429341, 10597743, 10399924, 10596704, 10536216, 10400405	0.00479242
KEGG	Hematopoietic cell lineage	10456071, 10521678, 10433114, 10352905, 10528207, 10458382	0.0134781
KEGG	Toll-like receptor signaling pathway	10478048, 10478678, 10505517, 10399924, 10458382, 10389231, 10346564, 10400405	0.0152458
KEGG	Leukocyte transendothelial migration	10583519, 10399924, 10596704, 10574438, 10600836, 10584317, 10392221, 10429341, 10465132	0.018061
KEGG	Natural killer cell mediated cytotoxicity	10450075, 10583519, 10551883, 10399924, 10392177, 10361897, 10360040, 10360070	0.0194201
KEGG	Endocytosis	10450075, 10530692, 10502537, 10560190, 10440307, 10532865, 10535807, 10456071, 10411229, 10606016, 10597518, 10486396, 10458498	0.024506
KEGG	Focal adhesion	10530692, 10433114, 10570068, 10399924, 10536499, 10576973, 10362538, 10430660, 10571788, 10375578, 10429341, 10535807	0.0430016
KEGG	ECM-receptor interaction	10433114, 10570068, 10528207, 10576973, 10362538, 10436182	0.0479055

## Sheet: (D) GO terms
E11.5 ♂+♀ supporting cell enriched
Category	Term	Transcript cluster ID's	p-value
BP	cellular aldehyde metabolic process	10355214, 10464560, 10386652	0.00423695
MF	carboxypeptidase activity	10578904, 10423556, 10537014	0.00901809
MF	gated channel activity	10525439, 10352798, 10560945, 10438530, 10555059	0.013219
MF	ion channel activity	10525439, 10352798, 10560945, 10438530, 10555059	0.0260235
MF	aldehyde dehydrogenase [NAD(P)+] activity	10464560, 10386652	0.0270583
MF	substrate specific channel activity	10525439, 10352798, 10560945, 10438530, 10555059	0.0280979
MF	channel activity	10525439, 10352798, 10560945, 10438530, 10555059	0.0295344
MF	passive transmembrane transporter activity	10525439, 10352798, 10560945, 10438530, 10555059	0.0295344
MF	GTPase regulator activity	10481210, 10486061, 10585982, 10442968, 10476759, 10438017, 10606619	0.0317939
MF	nucleoside-triphosphatase regulator activity	10481210, 10486061, 10585982, 10442968, 10476759, 10438017, 10606619	0.0349492
MF	exopeptidase activity	10578904, 10423556, 10537014	0.048723
E11.5 ♂+♀ supporting cell depleted
Category	Term	Transcript cluster IDs	p-value
BP	mitotic cell cycle	10492558, 10352709, 10478572, 10352767, 10420426, 10474381, 10538811, 10382998, 10538832, 10459755, 10462632, 10359890, 10350392, 10462866, 10400589, 10515744, 10377405, 10487340, 10594774, 10490104, 10528077, 10583952	1.85931e-17
BP	nuclear division	10492558, 10352709, 10478572, 10352767, 10420426, 10474381, 10382998, 10538832, 10459755, 10462632, 10359890, 10350392, 10462866, 10400589, 10515744, 10377405, 10487340, 10594774, 10583952	1.33852e-15
BP	mitosis	10492558, 10352709, 10478572, 10352767, 10420426, 10474381, 10382998, 10538832, 10459755, 10462632, 10359890, 10350392, 10462866, 10400589, 10515744, 10377405, 10487340, 10594774, 10583952	1.33852e-15
BP	M phase of mitotic cell cycle	10492558, 10352709, 10478572, 10352767, 10420426, 10474381, 10382998, 10538832, 10459755, 10462632, 10359890, 10350392, 10462866, 10400589, 10515744, 10377405, 10487340, 10594774, 10583952	1.76816e-15
BP	organelle fission	10492558, 10352709, 10478572, 10352767, 10420426, 10474381, 10382998, 10538832, 10459755, 10462632, 10359890, 10350392, 10462866, 10400589, 10515744, 10377405, 10487340, 10594774, 10583952	2.12898e-15
BP	cell cycle	10492558, 10478572, 10438378, 10352767, 10366277, 10538811, 10538832, 10459755, 10359890, 10350392, 10493820, 10400589, 10377405, 10487340, 10594774, 10577508, 10528077, 10583952, 10352709, 10420426, 10474381, 10382998, 10462632, 10462866, 10515744, 10563780, 10490104	1.30965e-14
BP	cell division	10492558, 10352709, 10478572, 10438378, 10352767, 10420426, 10382998, 10538832, 10572906, 10459755, 10462632, 10359890, 10350392, 10462866, 10400589, 10515744, 10377405, 10487340, 10594774, 10583952	5.88635e-14
BP	M phase	10492558, 10352709, 10478572, 10352767, 10420426, 10474381, 10382998, 10538832, 10459755, 10462632, 10359890, 10350392, 10462866, 10400589, 10515744, 10377405, 10487340, 10594774, 10583952	7.35974e-13
BP	cell cycle phase	10492558, 10352709, 10478572, 10352767, 10420426, 10474381, 10382998, 10538832, 10459755, 10462632, 10359890, 10350392, 10462866, 10400589, 10515744, 10377405, 10487340, 10594774, 10528077, 10583952	8.25336e-13
BP	cell cycle process	10492558, 10352709, 10478572, 10352767, 10420426, 10474381, 10382998, 10538832, 10459755, 10462632, 10359890, 10350392, 10462866, 10400589, 10515744, 10377405, 10487340, 10594774, 10528077, 10583952	1.5534e-11
BP	chromosome segregation	10492558, 10352709, 10359890, 10352767, 10420426, 10474381, 10382998, 10538832, 10583952, 10459755	1.26801e-09
BP	mitotic sister chromatid segregation	10492558, 10352767, 10474381, 10538832, 10583952	8.82275e-06
BP	sister chromatid segregation	10492558, 10352767, 10474381, 10538832, 10583952	1.12744e-05
MF	microtubule motor activity	10568150, 10462632, 10391811, 10474381, 10590494, 10454709	1.83924e-05
BP	microtubule-based movement	10568150, 10462632, 10391811, 10474381, 10590494, 10454709	0.000186958
BP	microtubule-based process	10568150, 10462632, 10359890, 10391811, 10474381, 10590494, 10382998, 10454709	0.000236242
MF	motor activity	10568150, 10462632, 10391811, 10474381, 10590494, 10454709	0.000350447
BP	chromosome organization	10492558, 10520521, 10352767, 10487340, 10538811, 10474381, 10564978, 10538832, 10583952, 10409557	0.00147805
BP	DNA packaging	10492558, 10520521, 10487340, 10583952, 10409557	0.00209545
BP	DNA replication	10438378, 10361110, 10384032, 10564978, 10528077, 10572906	0.00388984
BP	chromosome condensation	10492558, 10487340, 10583952	0.00641994
BP	DNA metabolic process	10568150, 10438378, 10361110, 10546834, 10384032, 10578690, 10564978, 10528077, 10572906	0.00753267
BP	regulation of cell cycle process	10382998, 10491805, 10528077, 10538832	0.00953994
MF	DNA binding	10568150, 10366277, 10546834, 10538811, 10597758, 10572906, 10368508, 10409557, 10371591, 10520521, 10400589, 10563780, 10384032, 10606436, 10578690, 10564978, 10360745	0.0167008
BP	regulation of microtubule cytoskeleton organization	10420426, 10491805, 10459755	0.0261549
BP	cell-matrix adhesion	10578222, 10412921, 10355403	0.0277541
BP	cell-substrate adhesion	10578222, 10412921, 10355403	0.0399877
BP	regulation of microtubule-based process	10420426, 10491805, 10459755	0.0399877
MF	ATP binding	10492558, 10568150, 10478572, 10352767, 10391811, 10474381, 10491805, 10572906, 10454709, 10462632, 10377405, 10564978, 10590494, 10490104	0.0456952
BP	organelle localization	10350392, 10474381, 10382998	0.0477347
BP	mitotic chromosome condensation	10492558, 10583952	0.0479692
MF	adenyl ribonucleotide binding	10492558, 10568150, 10478572, 10352767, 10391811, 10474381, 10491805, 10572906, 10454709, 10462632, 10377405, 10564978, 10590494, 10490104	0.0481639
MF	microtubule binding	10474381, 10382998, 10459755	0.0494
E11.5 ♂ supporting cell enriched
Category	Term	Transcript cluster IDs	p-value
MF	glutathione transferase activity	10501229, 10501199, 10501208, 10501222	0.00202282
BP	cartilage development	10549200, 10382328, 10415651, 10365290, 10567108	0.00352229
BP	lipid biosynthetic process	10573939, 10465895, 10441740, 10460221, 10480734, 10410065, 10494643, 10349932, 10556769	0.00378462
BP	cellular amino acid derivative metabolic process	10573939, 10460221, 10487011, 10349932, 10605338, 10458828	0.00414614
BP	male sex determination	10382328, 10415651, 10608193	0.00455685
BP	ethanolamine and derivative metabolic process	10573939, 10460221, 10349932	0.00719892
BP	sex determination	10382328, 10415651, 10608193	0.00872364
BP	secondary metabolic process	10545771, 10422249, 10496438, 10605338	0.0098394
BP	developmental growth	10382328, 10473880, 10487011, 10387516, 10365290	0.0153595
MF	sialyltransferase activity	10434758, 10592084, 10440099	0.0166946
MF	transferase activity, transferring alkyl or aryl (other than methyl) groups	10501229, 10501199, 10501208, 10501222	0.0208132
BP	adult behavior	10360270, 10496438, 10548905, 10544114	0.02359
BP	behavioral response to ethanol	10496438, 10548905	0.026141
BP	growth	10382328, 10473880, 10487011, 10387516, 10349932, 10365290	0.0322979
BP	oxidation reduction	10420155, 10465895, 10391454, 10580233, 10496438, 10410065, 10537146, 10529979, 10605338, 10608107, 10458828	0.0408387
MF	ATPase activity, coupled to transmembrane movement of substances	10387505, 10360270, 10519527, 10501832	0.0423856
MF	hydrolase activity, acting on acid anhydrides, catalyzing transmembrane movement of substances	10387505, 10360270, 10519527, 10501832	0.0423856
MF	ATPase activity, coupled to movement of substances	10387505, 10360270, 10519527, 10501832	0.0423856
BP	negative regulation of signal transduction	10473880, 10415651, 10369290, 10365290, 10452633	0.045067
MF	calcium ion binding	10573939, 10473880, 10598863, 10545958, 10518069, 10409345, 10417628, 10575120, 10533529, 10540085, 10410547, 10555681	0.0490469
E11.5 ♀ supporting cell enriched
Category	Term	Transcript cluster IDs	p-value
BP	di-, tri-valent inorganic cation transport	10409602, 10600180, 10418355, 10411751, 10469404, 10407598, 10463462	0.00362056
BP	keratinization	10476042, 10493867, 10493864	0.00794112
MF	calcium channel activity	10409602, 10418355, 10469404, 10407598	0.0123836
MF	metal ion transmembrane transporter activity	10409602, 10600180, 10418355, 10411751, 10469404, 10407598, 10470214	0.0138536
BP	regulation of phosphorylation	10476395, 10506433, 10443463, 10542317, 10523175, 10418410, 10392183, 10405211, 10366052, 10542310	0.0181043
BP	epidermis development	10476042, 10493867, 10493864, 10425987, 10412260	0.018351
MF	enzyme inhibitor activity	10489503, 10443463, 10450038, 10478540, 10542317, 10404422, 10542310	0.020021
BP	calcium ion transport	10409602, 10600180, 10418355, 10469404, 10407598	0.0228803
BP	regulation of phosphate metabolic process	10476395, 10506433, 10443463, 10542317, 10523175, 10418410, 10392183, 10405211, 10366052, 10542310	0.0231903
BP	regulation of phosphorus metabolic process	10476395, 10506433, 10443463, 10542317, 10523175, 10418410, 10392183, 10405211, 10366052, 10542310	0.0231903
BP	regulation of protein kinase activity	10506433, 10443463, 10542317, 10523175, 10392183, 10405211, 10366052, 10542310	0.0236834
BP	ectoderm development	10476042, 10493867, 10493864, 10425987, 10412260	0.0253785
BP	metal ion transport	10409602, 10600180, 10418355, 10411751, 10469404, 10407598, 10542317, 10463462, 10470214, 10542310	0.0270963
BP	glycerol metabolic process	10487945, 10592266, 10587988	0.0274921
BP	negative regulation of apoptosis	10529651, 10443463, 10450038, 10557992, 10443091, 10542317, 10430693, 10443080, 10366052, 10542310	0.0277137
BP	regulation of kinase activity	10506433, 10443463, 10542317, 10523175, 10392183, 10405211, 10366052, 10542310	0.027971
BP	epithelial cell differentiation	10351623, 10476042, 10493867, 10493864, 10568436	0.0280351
BP	negative regulation of programmed cell death	10529651, 10443463, 10450038, 10557992, 10443091, 10542317, 10430693, 10443080, 10366052, 10542310	0.0301301
BP	negative regulation of cell death	10529651, 10443463, 10450038, 10557992, 10443091, 10542317, 10430693, 10443080, 10366052, 10542310	0.0309663
BP	alditol metabolic process	10487945, 10592266, 10587988	0.0310649
BP	regulation of transferase activity	10506433, 10443463, 10542317, 10523175, 10392183, 10405211, 10366052, 10542310	0.0317499
BP	negative regulation of catalytic activity	10443463, 10450038, 10474002, 10542317, 10405211, 10542310	0.0338297
BP	BMP signaling pathway	10529651, 10476395, 10412260	0.0348101
BP	response to organic substance	10529651, 10493867, 10545111, 10407598, 10545119, 10464370, 10468869, 10493864, 10507273, 10392183	0.0352317
BP	keratinocyte differentiation	10476042, 10493867, 10493864	0.0387207
BP	cell surface receptor linked signal transduction	10545111, 10523175, 10412260, 10568436, 10584494, 10373093, 10529651, 10568873, 10476395, 10418355, 10508012, 10530421, 10443091, 10474002, 10545119, 10427222, 10443080, 10507273, 10397606	0.0429057
BP	fatty acid metabolic process	10457071, 10551614, 10431564, 10420372, 10514933, 10425987	0.0433472
BP	epidermal cell differentiation	10476042, 10493867, 10493864	0.0470106
MF	phosphoric diester hydrolase activity	10491106, 10487945, 10516956, 10497399	0.0490521
E11.5 ♀ supporting cell depleted
Category	Term	Transcript cluster IDs	p-value
BP	M phase	10496204, 10478160, 10419323, 10591556, 10557156, 10462796, 10369815, 10487480, 10497831, 10504957, 10360985, 10568714, 10547943, 10516246, 10352048, 10458195, 10346365, 10606071, 10584710, 10556266, 10591781, 10509820, 10479765, 10474984	1.89308e-16
BP	cell cycle phase	10591556, 10419323, 10360985, 10568714, 10547943, 10352048, 10516246, 10592201, 10346365, 10584710, 10556266, 10591781, 10509820, 10474984, 10496204, 10478160, 10557156, 10462796, 10369815, 10487480, 10504957, 10497831, 10458195, 10606071, 10479765	4.2664e-16
BP	cell cycle process	10591556, 10419323, 10360985, 10568714, 10547943, 10352048, 10516246, 10592201, 10346365, 10584710, 10556266, 10591781, 10509820, 10474984, 10496204, 10478160, 10557156, 10462796, 10369815, 10487480, 10504957, 10497831, 10458195, 10606071, 10479765	1.96352e-14
BP	cell cycle	10594988, 10419323, 10591556, 10508151, 10360985, 10523281, 10568714, 10353420, 10547943, 10516246, 10352048, 10592201, 10346365, 10584710, 10556266, 10591781, 10509820, 10474984, 10496204, 10478160, 10557156, 10462796, 10369815, 10487480, 10504957, 10497831, 10458195, 10606071, 10479765	9.34317e-14
BP	M phase of mitotic cell cycle	10496204, 10478160, 10419323, 10591556, 10557156, 10462796, 10369815, 10487480, 10504957, 10497831, 10360985, 10547943, 10516246, 10458195, 10606071, 10556266, 10591781, 10509820, 10474984	1.13418e-13
BP	mitotic cell cycle	10496204, 10478160, 10419323, 10591556, 10557156, 10462796, 10369815, 10487480, 10497831, 10504957, 10360985, 10547943, 10516246, 10458195, 10592201, 10606071, 10556266, 10591781, 10509820, 10474984	4.68951e-13
BP	cell division	10496204, 10478160, 10591556, 10557156, 10462796, 10369815, 10487480, 10497831, 10504957, 10523281, 10547943, 10516246, 10458195, 10390707, 10346365, 10606071, 10556266, 10591781, 10509820, 10474984	4.44178e-12
BP	nuclear division	10496204, 10478160, 10591556, 10557156, 10462796, 10369815, 10487480, 10504957, 10497831, 10547943, 10516246, 10458195, 10606071, 10556266, 10591781, 10509820, 10474984	1.5047e-11
BP	mitosis	10496204, 10478160, 10591556, 10557156, 10462796, 10369815, 10487480, 10504957, 10497831, 10547943, 10516246, 10458195, 10606071, 10556266, 10591781, 10509820, 10474984	1.5047e-11
BP	organelle fission	10496204, 10478160, 10591556, 10557156, 10462796, 10369815, 10487480, 10504957, 10497831, 10547943, 10516246, 10458195, 10606071, 10556266, 10591781, 10509820, 10474984	2.30592e-11
MF	adenyl nucleotide binding	10594988, 10424349, 10555695, 10427772, 10353420, 10382300, 10350297, 10396610, 10592201, 10390707, 10556266, 10402708, 10384373, 10364293, 10496204, 10398173, 10557156, 10358091, 10462796, 10369815, 10487480, 10504957, 10594251, 10587266, 10428763, 10355893, 10606071, 10587508	4.71222e-07
MF	purine nucleoside binding	10594988, 10424349, 10555695, 10427772, 10353420, 10382300, 10350297, 10396610, 10592201, 10390707, 10556266, 10402708, 10384373, 10364293, 10496204, 10398173, 10557156, 10358091, 10462796, 10369815, 10487480, 10504957, 10594251, 10587266, 10428763, 10355893, 10606071, 10587508	5.47136e-07
MF	nucleoside binding	10594988, 10424349, 10555695, 10427772, 10353420, 10382300, 10350297, 10396610, 10592201, 10390707, 10556266, 10402708, 10384373, 10364293, 10496204, 10398173, 10557156, 10358091, 10462796, 10369815, 10487480, 10504957, 10594251, 10587266, 10428763, 10355893, 10606071, 10587508	6.00213e-07
MF	ATP binding	10594988, 10555695, 10427772, 10353420, 10382300, 10350297, 10396610, 10592201, 10390707, 10556266, 10402708, 10384373, 10364293, 10496204, 10398173, 10557156, 10358091, 10462796, 10369815, 10487480, 10504957, 10594251, 10587266, 10428763, 10355893, 10606071, 10587508	6.95412e-07
MF	adenyl ribonucleotide binding	10594988, 10555695, 10427772, 10353420, 10382300, 10350297, 10396610, 10592201, 10390707, 10556266, 10402708, 10384373, 10364293, 10496204, 10398173, 10557156, 10358091, 10462796, 10369815, 10487480, 10504957, 10594251, 10587266, 10428763, 10355893, 10606071, 10587508	8.08629e-07
MF	purine nucleotide binding	10477004, 10594988, 10424349, 10555695, 10427772, 10523281, 10353420, 10382300, 10350297, 10396610, 10592201, 10390707, 10556266, 10402708, 10384373, 10364293, 10496204, 10398173, 10557156, 10358091, 10462796, 10369815, 10487480, 10504957, 10594251, 10587266, 10428763, 10355893, 10606071, 10587508	2.09499e-06
MF	purine ribonucleotide binding	10477004, 10594988, 10555695, 10427772, 10523281, 10353420, 10382300, 10350297, 10396610, 10592201, 10390707, 10556266, 10402708, 10384373, 10364293, 10496204, 10398173, 10557156, 10358091, 10462796, 10369815, 10487480, 10504957, 10594251, 10587266, 10428763, 10355893, 10606071, 10587508	3.6362e-06
MF	ribonucleotide binding	10477004, 10594988, 10555695, 10427772, 10523281, 10353420, 10382300, 10350297, 10396610, 10592201, 10390707, 10556266, 10402708, 10384373, 10364293, 10496204, 10398173, 10557156, 10358091, 10462796, 10369815, 10487480, 10504957, 10594251, 10587266, 10428763, 10355893, 10606071, 10587508	3.6362e-06
MF	nucleotide binding	10477004, 10594988, 10406581, 10424349, 10555695, 10524169, 10427772, 10523281, 10353420, 10382300, 10350297, 10396610, 10592201, 10390707, 10556266, 10402708, 10384373, 10364293, 10496204, 10398173, 10358091, 10557156, 10462796, 10369815, 10487480, 10504957, 10594251, 10587266, 10428763, 10355893, 10606071, 10587508	7.34116e-06
BP	cell cycle checkpoint	10496204, 10508151, 10592201, 10520842, 10369815, 10584710	0.000125986
BP	DNA integrity checkpoint	10508151, 10592201, 10520842, 10369815, 10584710	0.000248917
BP	chromosome condensation	10547943, 10390707, 10504957, 10474984	0.000416688
BP	DNA packaging	10547943, 10390707, 10584710, 10504957, 10408077, 10474984	0.000553721
BP	microtubule-based process	10477004, 10350297, 10496204, 10358091, 10462796, 10594251, 10536483, 10474984	0.000896761
BP	regulation of cell cycle	10496204, 10508151, 10592201, 10520842, 10369815, 10584710, 10360985, 10474984	0.00176422
BP	microtubule cytoskeleton organization	10477004, 10496204, 10358091, 10462796, 10536483, 10474984	0.00181053
BP	DNA damage checkpoint	10592201, 10520842, 10369815, 10584710	0.00272927
BP	DNA metabolic process	10353420, 10352048, 10394978, 10508151, 10592201, 10390707, 10520842, 10410947, 10584710, 10555695, 10524169	0.00280239
BP	chromosome segregation	10496204, 10390707, 10346365, 10360985, 10474984	0.00348215
MF	oxidoreductase activity, acting on the CH-NH group of donors, NAD or NADP as acceptor	10406581, 10396610, 10545672	0.00360644
BP	microtubule-based movement	10477004, 10350297, 10496204, 10462796, 10594251	0.00436398
MF	protein kinase activity	10594988, 10382300, 10398173, 10355893, 10592201, 10557156, 10369815, 10487480, 10587508, 10556266, 10536483	0.00502333
BP	M phase of meiotic cell cycle	10352048, 10346365, 10584710, 10568714, 10479765	0.00687326
BP	meiosis	10352048, 10346365, 10584710, 10568714, 10479765	0.00687326
MF	protein serine/threonine kinase activity	10594988, 10382300, 10398173, 10592201, 10557156, 10369815, 10487480, 10587508, 10556266	0.00753633
BP	meiotic cell cycle	10352048, 10346365, 10584710, 10568714, 10479765	0.00753744
MF	microtubule motor activity	10350297, 10496204, 10462796, 10594251	0.0076175
MF	oxidoreductase activity, acting on the CH-NH group of donors	10406581, 10396610, 10545672	0.00927962
BP	DNA damage response, signal transduction	10592201, 10520842, 10369815, 10584710	0.013929
BP	serine family amino acid metabolic process	10406581, 10587266, 10466410	0.0139538
BP	response to DNA damage stimulus	10352048, 10508151, 10592201, 10520842, 10410947, 10369815, 10584710, 10524169	0.0140846
BP	DNA repair	10352048, 10508151, 10592201, 10520842, 10410947, 10584710, 10524169	0.0148389
BP	protein amino acid phosphorylation	10594988, 10382300, 10398173, 10355893, 10592201, 10557156, 10369815, 10487480, 10587508, 10556266, 10536483	0.015033
MF	methenyltetrahydrofolate cyclohydrolase activity	10396610, 10545672	0.0183892
MF	methylenetetrahydrofolate dehydrogenase activity	10396610, 10545672	0.0183892
MF	methylenetetrahydrofolate dehydrogenase (NADP+) activity	10396610, 10545672	0.0183892
BP	chromosome organization	10547943, 10390707, 10520842, 10346365, 10584710, 10504957, 10408077, 10479765, 10474984	0.0198478
BP	positive regulation of cell cycle	10496204, 10360985, 10474984	0.0205256
MF	protein tyrosine kinase activity	10382300, 10355893, 10587508, 10556266, 10536483	0.0207876
MF	oxidoreductase activity, acting on CH or CH2 groups	10394978, 10555695	0.0274584
MF	oxidoreductase activity, acting on CH or CH2 groups, disulfide as acceptor	10394978, 10555695	0.0274584
MF	ribonucleoside-diphosphate reductase activity	10394978, 10555695	0.0274584
BP	cellular amino acid biosynthetic process	10406581, 10396610, 10466410	0.0281373
BP	phosphorylation	10594988, 10382300, 10398173, 10355893, 10592201, 10557156, 10369815, 10487480, 10587508, 10556266, 10536483	0.0318015
BP	cytoskeleton organization	10477004, 10496204, 10358091, 10362245, 10462796, 10536483, 10474984	0.0319238
BP	regulation of mitotic cell cycle	10496204, 10369815, 10360985, 10474984	0.0362105
MF	motor activity	10350297, 10496204, 10462796, 10594251	0.0385775
BP	inorganic anion transport	10455873, 10475990, 10536483	0.0486022
BP	amine biosynthetic process	10406581, 10396610, 10466410	0.0486022
BP	phosphorus metabolic process	10594988, 10382300, 10458195, 10398173, 10355893, 10592201, 10557156, 10369815, 10487480, 10587508, 10556266, 10536483	0.0491017
BP	phosphate metabolic process	10594988, 10382300, 10458195, 10398173, 10355893, 10592201, 10557156, 10369815, 10487480, 10587508, 10556266, 10536483	0.0491017
E12.5 ♂+♀ supporting cell enriched
Category	Term	Transcript cluster IDs	p-value
BP	secretion by cell	10572580, 10606619, 10569848	0.0384866
BP	secretion	10572580, 10606619, 10569848	0.0493433
E12.5 ♂+♀ supporting cell depleted
Category	Term	Transcript cluster IDs	p-value
MF	GTPase regulator activity	10591612, 10558345, 10578222, 10601942, 10522024	0.00159108
MF	nucleoside-triphosphatase regulator activity	10591612, 10558345, 10578222, 10601942, 10522024	0.00172955
BP	cell-matrix adhesion	10578222, 10412921, 10355403	0.00198614
BP	cell-substrate adhesion	10578222, 10412921, 10355403	0.00294182
BP	cell-substrate junction assembly	10578222, 10355403	0.0270429
BP	cell junction assembly	10578222, 10355403	0.0372603
MF	small GTPase regulator activity	10578222, 10601942, 10522024	0.0437798
BP	heart development	10391762, 10578222, 10375402	0.0496303
E12.5 ♂ supporting cell enriched
Category	Term	Transcript cluster IDs	p-value
BP	cell adhesion	10586079, 10382328, 10581890, 10407955, 10363676, 10387505, 10408850, 10454172, 10381006, 10362138, 10527965, 10523717, 10549594, 10435305, 10470775, 10560709, 10571530, 10369307, 10584827, 10584615, 10370259, 10345241, 10553450, 10421269, 10561187, 10475027, 10424140, 10435193, 10491313, 10362201, 10515613	3.28365e-05
BP	biological adhesion	10586079, 10382328, 10581890, 10407955, 10363676, 10387505, 10408850, 10454172, 10381006, 10362138, 10527965, 10523717, 10549594, 10435305, 10470775, 10560709, 10571530, 10369307, 10584827, 10584615, 10370259, 10345241, 10553450, 10421269, 10561187, 10475027, 10424140, 10435193, 10491313, 10362201, 10515613	3.28365e-05
MF	scavenger receptor activity	10368289, 10416023, 10516735, 10495854, 10539263, 10584870	0.000125235
MF	calcium ion binding	10586079, 10413726, 10596893, 10518069, 10513362, 10407955, 10535231, 10557165, 10533483, 10454172, 10454254, 10574350, 10396936, 10486119, 10540085, 10394186, 10598863, 10348194, 10379795, 10588592, 10417628, 10557177, 10375956, 10571530, 10533529, 10369307, 10526087, 10555681, 10345241, 10573939, 10401454, 10553450, 10473880, 10509838, 10409345, 10524955, 10575120, 10462922	0.000234761
BP	transmembrane receptor protein tyrosine kinase signaling pathway	10440738, 10380761, 10415651, 10581890, 10420957, 10422844, 10537657, 10473880, 10380896, 10355278, 10492522, 10545623, 10425267, 10561104, 10373467, 10362201	0.000766353
BP	cellular homeostasis	10598863, 10416023, 10360270, 10525439, 10456745, 10480921, 10557177, 10585874, 10512851, 10406598, 10360972, 10533483, 10507784, 10380896, 10408741, 10599976, 10524955, 10390635, 10357878, 10463355, 10491313, 10518031	0.000979104
BP	adult behavior	10433445, 10507784, 10360270, 10552938, 10548905, 10585874, 10544114, 10369307, 10381154	0.00110499
BP	adult locomotory behavior	10507784, 10360270, 10552938, 10548905, 10585874, 10544114, 10369307, 10381154	0.00118228
BP	ion transport	10522368, 10416023, 10431874, 10360270, 10490989, 10535231, 10443021, 10436945, 10557165, 10475990, 10533483, 10387505, 10345855, 10505008, 10549594, 10500685, 10584883, 10600377, 10525439, 10600210, 10588592, 10352798, 10383799, 10557177, 10360972, 10564631, 10555681, 10520187	0.00119576
BP	enzyme linked receptor protein signaling pathway	10440738, 10415651, 10380761, 10581890, 10420957, 10456745, 10422844, 10537657, 10558410, 10473880, 10380896, 10492522, 10355278, 10545623, 10425267, 10561104, 10373467, 10535043, 10544114, 10362201	0.00132177
BP	ion homeostasis	10598863, 10416023, 10360270, 10525439, 10456745, 10557177, 10557165, 10585874, 10406598, 10533483, 10360972, 10507784, 10345855, 10380896, 10524955, 10357878, 10463355, 10491313	0.00188553
MF	growth factor activity	10364903, 10604751, 10561187, 10552938, 10415651, 10347669, 10535043, 10422844, 10357155, 10362201	0.00255071
BP	peripheral nervous system development	10380896, 10430458, 10436945, 10373467, 10422844, 10448967	0.00259965
BP	cell-cell adhesion	10382328, 10560709, 10571530, 10363676, 10369307, 10584615, 10454172, 10381006, 10527965, 10362138, 10549594, 10491313, 10362201, 10515613	0.00298882
BP	oxidation reduction	10521984, 10394082, 10587829, 10490989, 10480921, 10395058, 10513320, 10344725, 10384603, 10568328, 10463355, 10404885, 10351414, 10605338, 10539263, 10465895, 10391454, 10475708, 10600082, 10537169, 10537146, 10529979, 10507612, 10389300, 10403558, 10410065, 10392881, 10434934, 10582303, 10458828, 10561128, 10458960	0.00302248
BP	sodium ion transport	10387505, 10345855, 10431874, 10360270, 10600210, 10436945, 10557165, 10500685	0.0033514
BP	nitrogen compound biosynthetic process	10600377, 10360270, 10525439, 10499666, 10553015, 10499811, 10437364, 10443021, 10395058, 10587639, 10533483, 10387505, 10496110, 10509838, 10592816, 10349932, 10500685, 10605338	0.00364034
BP	cation transport	10522368, 10600377, 10431874, 10416023, 10360270, 10490989, 10525439, 10600210, 10588592, 10352798, 10383799, 10557177, 10443021, 10436945, 10557165, 10360972, 10533483, 10555681, 10387505, 10345855, 10505008, 10500685	0.00368887
BP	cellular ion homeostasis	10598863, 10416023, 10360270, 10525439, 10456745, 10557177, 10585874, 10406598, 10533483, 10360972, 10507784, 10380896, 10524955, 10357878, 10463355, 10491313	0.00416021
MF	cysteine-type endopeptidase inhibitor activity	10476915, 10476906, 10488404, 10488415, 10476924	0.00528334
BP	cellular chemical homeostasis	10598863, 10416023, 10360270, 10525439, 10456745, 10557177, 10585874, 10406598, 10533483, 10360972, 10507784, 10380896, 10524955, 10357878, 10463355, 10491313	0.00528559
BP	metal ion transport	10522368, 10431874, 10416023, 10360270, 10490989, 10525439, 10600210, 10588592, 10352798, 10383799, 10557177, 10436945, 10557165, 10360972, 10533483, 10555681, 10387505, 10345855, 10500685	0.00541136
BP	negative regulation of heart contraction	10360270, 10357878, 10500685, 10533483	0.00634652
BP	chemical homeostasis	10598863, 10416023, 10360270, 10525439, 10456745, 10557177, 10557165, 10585874, 10406598, 10533483, 10360972, 10507784, 10345855, 10380896, 10524955, 10357878, 10463355, 10491313, 10401519	0.00726579
BP	development of primary male sexual characteristics	10382328, 10479423, 10432372, 10415651, 10524955, 10482237, 10420362	0.0076776
MF	endopeptidase inhibitor activity	10476915, 10476906, 10488404, 10488415, 10561712, 10476924, 10533085, 10355984	0.00770659
BP	cell projection organization	10423520, 10416057, 10348194, 10565634, 10378549, 10422844, 10369307, 10345241, 10494174, 10380896, 10398267, 10377215, 10575497, 10549594, 10535559, 10535043, 10436519, 10381154	0.00802255
BP	positive regulation of developmental process	10440738, 10416057, 10421853, 10546450, 10415651, 10572130, 10546454, 10546452, 10546434, 10450154, 10546432, 10534324, 10497548, 10546430, 10406205, 10524955, 10362138, 10594447, 10452633	0.00914896
MF	protein dimerization activity	10451613, 10544002, 10368566, 10585874, 10422844, 10534324, 10526087, 10433096, 10357155, 10584615, 10558410, 10433445, 10460221, 10492522, 10381006, 10409278, 10357878, 10605338, 10497285, 10436519	0.00966625
MF	alkali metal ion binding	10387505, 10431874, 10360270, 10600210, 10352798, 10436945, 10404885, 10500685, 10360972, 10497285	0.0103974
BP	male gonad development	10382328, 10479423, 10432372, 10415651, 10524955, 10482237	0.0104511
BP	cellular amino acid derivative metabolic process	10573939, 10433445, 10460221, 10487011, 10509838, 10499811, 10349932, 10605338, 10351414, 10458828	0.0107555
BP	male sex differentiation	10382328, 10479423, 10432372, 10415651, 10524955, 10482237, 10420362	0.0110181
MF	peptidase inhibitor activity	10476915, 10476906, 10488404, 10488415, 10561712, 10476924, 10533085, 10355984	0.011675
BP	nucleotide biosynthetic process	10387505, 10600377, 10360270, 10499666, 10496110, 10499811, 10443021, 10437364, 10605338, 10500685, 10587639, 10533483	0.0117063
MF	protein homodimerization activity	10451613, 10368566, 10422844, 10357155, 10526087, 10584615, 10558410, 10433445, 10460221, 10492522, 10381006, 10605338, 10497285	0.0120402
BP	protein amino acid phosphorylation	10357579, 10499811, 10456745, 10534324, 10441565, 10483856, 10537657, 10459747, 10576569, 10344750, 10380896, 10357878, 10373467, 10594447, 10544114, 10447294, 10429754, 10420957, 10557177, 10560510, 10533529, 10443408, 10558410, 10355278, 10475027, 10602198, 10425267, 10515295, 10462922, 10561104, 10491136, 10507218	0.0130174
MF	identical protein binding	10451613, 10368566, 10422844, 10526087, 10357155, 10605766, 10584615, 10558410, 10433445, 10460221, 10492522, 10381006, 10425267, 10527965, 10491313, 10605338, 10497285	0.0154777
BP	nucleobase, nucleoside and nucleotide biosynthetic process	10387505, 10600377, 10360270, 10499666, 10496110, 10499811, 10443021, 10437364, 10605338, 10500685, 10587639, 10533483	0.0159246
BP	transmission of nerve impulse	10433445, 10507784, 10380896, 10525439, 10360270, 10425267, 10357878, 10463355, 10491313, 10585874, 10406598, 10504234	0.0159246
BP	nucleobase, nucleoside, nucleotide and nucleic acid biosynthetic process	10387505, 10600377, 10360270, 10499666, 10496110, 10499811, 10443021, 10437364, 10605338, 10500685, 10587639, 10533483	0.0159246
BP	regulation of membrane potential	10380896, 10525439, 10456745, 10357878, 10463355, 10491313, 10585874, 10406598, 10360972	0.0170519
BP	regulation of heart contraction	10360270, 10381006, 10456745, 10357878, 10500685, 10533483	0.0198024
BP	purine nucleotide biosynthetic process	10387505, 10600377, 10360270, 10499666, 10499811, 10443021, 10437364, 10500685, 10587639, 10533483	0.0204425
BP	cell morphogenesis involved in differentiation	10423520, 10494174, 10382328, 10380896, 10398267, 10565634, 10378549, 10369307, 10436519, 10381154, 10370259, 10345241	0.0211929
BP	purine nucleotide metabolic process	10387505, 10600377, 10360270, 10499666, 10496110, 10499811, 10443021, 10437364, 10500685, 10587639, 10533483	0.0230194
BP	phosphorylation	10357579, 10499811, 10456745, 10443021, 10534324, 10441565, 10537657, 10483856, 10459747, 10576569, 10344750, 10380896, 10357878, 10373467, 10594447, 10544114, 10447294, 10600377, 10429754, 10420957, 10557177, 10560510, 10533529, 10443408, 10558410, 10355278, 10475027, 10602198, 10425267, 10515295, 10462922, 10561104, 10491136, 10507218	0.0235603
MF	sodium ion binding	10387505, 10431874, 10360270, 10600210, 10436945, 10500685	0.0239552
BP	phosphate metabolic process	10357579, 10499811, 10456745, 10443021, 10534324, 10441565, 10488678, 10537657, 10483856, 10459747, 10576569, 10344750, 10380896, 10599976, 10357878, 10373467, 10594447, 10544114, 10447294, 10600377, 10435383, 10429754, 10420957, 10441456, 10557177, 10560510, 10533529, 10443408, 10558410, 10355278, 10475027, 10602198, 10425267, 10462922, 10515295, 10561104, 10491136, 10507218, 10515613, 10497285	0.0243838
BP	phosphorus metabolic process	10357579, 10499811, 10456745, 10443021, 10534324, 10441565, 10488678, 10537657, 10483856, 10459747, 10576569, 10344750, 10380896, 10599976, 10357878, 10373467, 10594447, 10544114, 10447294, 10600377, 10435383, 10429754, 10420957, 10441456, 10557177, 10560510, 10533529, 10443408, 10558410, 10355278, 10475027, 10602198, 10425267, 10462922, 10515295, 10561104, 10491136, 10507218, 10515613, 10497285	0.0243838
BP	homeostatic process	10416023, 10360270, 10456745, 10480921, 10557165, 10585874, 10512851, 10533483, 10507784, 10345855, 10380896, 10599976, 10357878, 10463355, 10605338, 10401519, 10598863, 10525439, 10557177, 10406598, 10360972, 10408741, 10390635, 10524955, 10491313, 10518031	0.0246788
BP	regulation of muscle contraction	10413726, 10360270, 10456745, 10500685, 10533483	0.0247922
MF	carbohydrate binding	10516735, 10573583, 10415651, 10564909, 10572130, 10532954, 10532944, 10573234, 10373036, 10405811, 10368289, 10425267, 10355984, 10362201	0.0259553
BP	filopodium assembly	10575497, 10549594, 10535559	0.0272907
BP	neuron projection development	10423520, 10494174, 10380896, 10416057, 10348194, 10398267, 10377215, 10378549, 10422844, 10436519, 10381154, 10345241	0.0276452
MF	sodium:potassium-exchanging ATPase activity	10387505, 10360270, 10500685	0.0283487
BP	ATP biosynthetic process	10387505, 10600377, 10360270, 10499666, 10443021, 10500685, 10533483	0.0293509
BP	neuron development	10423520, 10416057, 10348194, 10565634, 10378549, 10422844, 10369307, 10345241, 10494174, 10380896, 10398267, 10377215, 10436519, 10381154	0.0296913
BP	cell-substrate adhesion	10421269, 10561187, 10407955, 10549594, 10435305, 10362201	0.0303355
BP	positive regulation of cell differentiation	10440738, 10416057, 10546450, 10572130, 10546454, 10450154, 10546452, 10546434, 10546432, 10534324, 10497548, 10546430, 10362138, 10524955, 10452633, 10594447	0.0321091
MF	transmembrane receptor protein tyrosine kinase activity	10380896, 10355278, 10475027, 10561104, 10373467, 10537657	0.0327103
BP	monovalent inorganic cation transport	10387505, 10600377, 10345855, 10431874, 10360270, 10600210, 10352798, 10436945, 10443021, 10557165, 10500685, 10360972	0.0337441
BP	regulation of system process	10413726, 10360270, 10588592, 10589494, 10381006, 10456745, 10357878, 10500685, 10422844, 10533483, 10357155	0.0338389
BP	cell morphogenesis involved in neuron differentiation	10423520, 10494174, 10380896, 10398267, 10565634, 10378549, 10369307, 10436519, 10381154, 10345241	0.0352498
BP	neuron projection morphogenesis	10423520, 10494174, 10380896, 10416057, 10398267, 10377215, 10378549, 10436519, 10381154, 10345241	0.0352498
BP	cell surface receptor linked signal transduction	10586079, 10440738, 10581890, 10499811, 10456745, 10565156, 10537657, 10573234, 10420846, 10380896, 10403834, 10594631, 10357878, 10435305, 10373467, 10535043, 10544114, 10433057, 10587194, 10415651, 10600082, 10380761, 10420957, 10360205, 10422844, 10360972, 10558410, 10473880, 10492522, 10355278, 10554704, 10425267, 10545623, 10534426, 10543466, 10462922, 10561104, 10362201, 10574259	0.0353178
BP	hexose metabolic process	10364251, 10521984, 10573583, 10384603, 10564909, 10593937, 10369541, 10510546, 10605338, 10384015, 10509127	0.0356329
BP	regulation of the force of heart contraction	10360270, 10500685, 10533483	0.0370748
BP	cartilage condensation	10382328, 10381006, 10362201	0.0370748
BP	microspike assembly	10575497, 10549594, 10535559	0.0370748
BP	skeletal muscle fiber development	10473880, 10380896, 10588592, 10440993	0.0392747
MF	ATPase activity, coupled to transmembrane movement of ions	10387505, 10600377, 10360270, 10499666, 10500685, 10533483	0.0395239
MF	ligase activity, forming carbon-sulfur bonds	10499766, 10470751, 10455901, 10477649	0.0413338
BP	behavior	10597461, 10360270, 10573583, 10552938, 10480734, 10376208, 10585874, 10369307, 10433445, 10507784, 10534426, 10548905, 10544114, 10447294, 10436519, 10381154	0.0441484
BP	neurological system process	10360270, 10573583, 10525439, 10552938, 10565634, 10376208, 10585874, 10406598, 10369307, 10420362, 10504234, 10433445, 10507784, 10380896, 10425267, 10534426, 10357878, 10463355, 10491313, 10486119	0.0443184
BP	cell-cell signaling	10433445, 10507784, 10432372, 10525439, 10360270, 10415651, 10425267, 10357878, 10535043, 10422844, 10420362, 10504234	0.0445903
BP	neurotransmitter transport	10507784, 10599008, 10360270, 10600210, 10504234	0.0450407
BP	striated muscle cell development	10504902, 10473880, 10380896, 10588592, 10440993	0.0450407
BP	striated muscle cell differentiation	10504902, 10473880, 10380896, 10588592, 10495285, 10440993, 10381082	0.046653
BP	ATP metabolic process	10387505, 10600377, 10360270, 10499666, 10443021, 10500685, 10533483	0.046653
BP	epidermis development	10382328, 10473880, 10470751, 10600082, 10552938, 10594447, 10535043	0.046653
BP	phospholipid biosynthetic process	10573939, 10441740, 10460221, 10349932, 10467068, 10379163, 10555671, 10406598	0.0468688
MF	glutathione transferase activity	10587315, 10501199, 10501208, 10501222	0.0479494
BP	male sex determination	10382328, 10432372, 10415651	0.047974
BP	development of primary sexual characteristics	10364903, 10382328, 10479423, 10432372, 10415651, 10524955, 10482237, 10420362	0.0498441
BP	vacuole organization	10569319, 10507784, 10493435, 10565634, 10585874	0.0499343
E12.5 ♂ supporting cell depleted
Category	Term	Transcript cluster IDs	p-value
BP	growth	10419261, 10344952, 10587107, 10558134, 10422598	0.00182251
BP	odontogenesis	10419261, 10587107, 10496091	0.00461472
BP	enzyme linked receptor protein signaling pathway	10555118, 10419261, 10494428, 10558134, 10467425	0.00682682
BP	transmembrane receptor protein tyrosine kinase signaling pathway	10555118, 10494428, 10558134, 10467425	0.0141703
BP	post-embryonic development	10419261, 10558134, 10422598	0.0245948
BP	branching involved in lung morphogenesis	10419261, 10344952	0.0273136
BP	embryonic limb morphogenesis	10419261, 10344952, 10496091	0.0292001
BP	embryonic appendage morphogenesis	10419261, 10344952, 10496091	0.0292001
BP	developmental growth	10419261, 10344952, 10587107	0.0332809
MF	GTPase regulator activity	10590860, 10599120, 10410892, 10352194, 10590844, 10483719	0.0349588
BP	developmental growth involved in morphogenesis	10419261, 10344952	0.0349841
BP	appendage morphogenesis	10419261, 10344952, 10496091	0.0366978
BP	limb morphogenesis	10419261, 10344952, 10496091	0.0366978
MF	nucleoside-triphosphatase regulator activity	10590860, 10599120, 10410892, 10352194, 10590844, 10483719	0.0375219
BP	limb development	10419261, 10344952, 10496091	0.0384553
BP	appendage development	10419261, 10344952, 10496091	0.0384553
BP	negative regulation of striated muscle development	10419261, 10496091	0.0387974
BP	organic acid biosynthetic process	10587107, 10592585, 10350753	0.0393461
BP	carboxylic acid biosynthetic process	10587107, 10592585, 10350753	0.0393461
BP	negative regulation of muscle development	10419261, 10496091	0.0425961
BP	skeletal system morphogenesis	10419261, 10344952, 10558134	0.0457993
BP	lung morphogenesis	10419261, 10344952	0.0463803
BP	neuron differentiation	10555118, 10419261, 10409737, 10355141	0.0499859
E12.5 ♀ supporting cell enriched
Category	Term	Transcript cluster IDs	p-value
BP	oxidation reduction	10504606, 10545308, 10436978, 10457071, 10531919, 10387768, 10403291, 10359034, 10531910, 10472162, 10355246, 10528929, 10498837, 10450103, 10539143, 10449955, 10524909, 10356968, 10511679, 10545086, 10472757, 10603746, 10400941	0.000139594
BP	fatty acid metabolic process	10450103, 10457071, 10551614, 10387768, 10397148, 10460157, 10431564, 10545086, 10425987, 10355246, 10528929	0.000198369
BP	glycerol metabolic process	10601044, 10487945, 10389590, 10587988, 10472162	0.000297238
BP	alditol metabolic process	10601044, 10487945, 10389590, 10587988, 10472162	0.000389274
MF	phosphoric diester hydrolase activity	10491106, 10601044, 10484283, 10487945, 10411171, 10516956, 10389590	0.00099149
BP	glucose metabolic process	10400844, 10460157, 10379153, 10543017, 10377938, 10425987, 10472162, 10461017, 10407173	0.00100715
BP	negative regulation of apoptosis	10542317, 10567964, 10404376, 10361828, 10450038, 10443091, 10557992, 10443080, 10430693, 10545086, 10405693, 10485372, 10542310, 10366052	0.00158695
BP	negative regulation of programmed cell death	10542317, 10567964, 10404376, 10361828, 10450038, 10443091, 10557992, 10443080, 10430693, 10545086, 10405693, 10485372, 10542310, 10366052	0.00182839
BP	negative regulation of cell death	10542317, 10567964, 10404376, 10361828, 10450038, 10443091, 10557992, 10443080, 10430693, 10545086, 10405693, 10485372, 10542310, 10366052	0.00192082
BP	monosaccharide metabolic process	10400844, 10460157, 10379153, 10543017, 10377938, 10425987, 10472162, 10461017, 10579012, 10407173	0.00232951
MF	ligand-gated ion channel activity	10508052, 10549282, 10407598, 10522324, 10560945	0.00306335
MF	ligand-gated channel activity	10508052, 10549282, 10407598, 10522324, 10560945	0.00306335
BP	polyol metabolic process	10601044, 10487945, 10389590, 10587988, 10472162	0.00456647
BP	hexose metabolic process	10400844, 10460157, 10379153, 10543017, 10377938, 10425987, 10472162, 10461017, 10407173	0.00474439
MF	cytokine binding	10436841, 10566050, 10436849, 10345762, 10407173	0.00737016
MF	glycerophosphodiester phosphodiesterase activity	10601044, 10487945, 10389590	0.00791383
MF	gated channel activity	10508052, 10453256, 10549282, 10418355, 10469404, 10407598, 10522324, 10560945	0.0100388
BP	epidermis development	10499870, 10476042, 10493864, 10420596, 10425987, 10412260	0.0102185
BP	di-, tri-valent inorganic cation transport	10549282, 10418355, 10411751, 10469404, 10407598, 10468853, 10463462	0.0129958
BP	keratinization	10499870, 10476042, 10493864	0.0133239
BP	receptor clustering	10443091, 10528583, 10443080, 10560945	0.0133239
MF	cytokine receptor activity	10436841, 10436849, 10345762, 10407173	0.0145843
BP	ectoderm development	10499870, 10476042, 10493864, 10420596, 10425987, 10412260	0.0152447
BP	signal complex assembly	10443091, 10528583, 10443080, 10560945	0.0207796
BP	negative regulation of catalytic activity	10450038, 10474002, 10542317, 10524909, 10567964, 10485372, 10542310	0.0217049
BP	regulation of apoptosis	10503659, 10528583, 10542317, 10567964, 10404376, 10361828, 10450038, 10557992, 10443091, 10430693, 10545086, 10443080, 10418410, 10461017, 10405693, 10485372, 10366052, 10542310	0.0217076
BP	regulation of programmed cell death	10503659, 10528583, 10542317, 10567964, 10404376, 10361828, 10450038, 10557992, 10443091, 10430693, 10545086, 10443080, 10418410, 10461017, 10405693, 10485372, 10366052, 10542310	0.0236505
BP	nerve-nerve synaptic transmission	10528583, 10545086, 10560945	0.0250197
BP	regulation of excitatory postsynaptic membrane potential	10528583, 10545086, 10560945	0.0250197
BP	regulation of cell death	10503659, 10528583, 10542317, 10567964, 10404376, 10361828, 10450038, 10557992, 10443091, 10430693, 10545086, 10443080, 10418410, 10461017, 10405693, 10485372, 10366052, 10542310	0.0251917
BP	learning	10403796, 10443091, 10528583, 10567964, 10443080	0.0253867
BP	regulation of membrane potential	10508052, 10528583, 10354494, 10567964, 10545086, 10560945	0.0255145
MF	extracellular ligand-gated ion channel activity	10508052, 10522324, 10560945	0.0268384
MF	ion channel activity	10508052, 10453256, 10549282, 10418355, 10469404, 10407598, 10522324, 10560945	0.0280023
BP	regulation of neuron apoptosis	10503659, 10528583, 10567964, 10545086, 10404376	0.0287763
MF	electron carrier activity	10498837, 10387768, 10539143, 10449955, 10524909, 10603746, 10355246	0.0288553
BP	cellular homeostasis	10508052, 10528583, 10452480, 10407598, 10354494, 10567964, 10359034, 10545086, 10560945, 10556583, 10561369	0.0293778
BP	regulation of postsynaptic membrane potential	10528583, 10545086, 10560945	0.0295782
BP	ion transport	10508052, 10453256, 10549282, 10542317, 10522324, 10438909, 10560945, 10418355, 10411751, 10463716, 10469404, 10407598, 10468853, 10463462, 10438911, 10542310	0.0303316
MF	calcium channel activity	10549282, 10418355, 10469404, 10407598	0.030671
MF	substrate specific channel activity	10508052, 10453256, 10549282, 10418355, 10469404, 10407598, 10522324, 10560945	0.0313533
MF	passive transmembrane transporter activity	10508052, 10453256, 10549282, 10418355, 10469404, 10407598, 10522324, 10560945	0.0337313
MF	channel activity	10508052, 10453256, 10549282, 10418355, 10469404, 10407598, 10522324, 10560945	0.0337313
BP	organophosphate metabolic process	10491106, 10368782, 10516956, 10567964, 10545086, 10371616, 10472162, 10600357	0.0338471
BP	enzyme linked receptor protein signaling pathway	10388884, 10503659, 10443091, 10528583, 10380381, 10443080, 10523175, 10560945, 10412260, 10507273, 10568436	0.0347898
BP	cell-cell signaling	10443091, 10528583, 10469404, 10567964, 10545086, 10443080, 10523175, 10560945, 10568436	0.0362526
MF	steroid dehydrogenase activity, acting on the CH-OH group of donors, NAD or NADP as acceptor	10450103, 10531919, 10403291	0.0368996
BP	regulation of synaptic transmission	10508052, 10443091, 10528583, 10545086, 10443080, 10560945	0.0387682
MF	carboxylic acid binding	10388377, 10545086, 10497773, 10356968, 10528929	0.0388566
BP	synaptic transmission	10443091, 10528583, 10469404, 10567964, 10545086, 10443080, 10560945	0.0411929
BP	behavior	10441003, 10403796, 10368782, 10460157, 10443091, 10528583, 10567964, 10545086, 10443080, 10404376, 10574456	0.044308
BP	protein tetramerization	10388377, 10476042, 10363455	0.045
BP	serine phosphorylation of STAT protein	10388884, 10528583	0.0452624
BP	serine phosphorylation of STAT3 protein	10388884, 10528583	0.0452624
BP	regulation of system process	10508052, 10443091, 10528583, 10407598, 10524909, 10545086, 10443080, 10560945	0.0463846
MF	steroid dehydrogenase activity	10450103, 10531919, 10403291	0.048162
BP	cytokine-mediated signaling pathway	10345762, 10523175, 10461017, 10407173	0.0484952
BP	transmission of nerve impulse	10443091, 10528583, 10469404, 10354494, 10567964, 10545086, 10443080, 10560945	0.0497501
E12.5 ♀ supporting cell depleted
Category	Term	Transcript cluster IDs	p-value
BP	cell cycle	10492558, 10452709, 10352767, 10591556, 10366277, 10508151, 10440794, 10525591, 10483401, 10538832, 10459755, 10524266, 10548699, 10352048, 10541729, 10350392, 10359890, 10377405, 10487340, 10371770, 10477187, 10594774, 10577508, 10591781, 10474902, 10528077, 10474984, 10352709, 10478160, 10554445, 10420426, 10474769, 10499639, 10504957, 10499366, 10462632, 10458195, 10462866, 10515744, 10490104,…	9.35327e-59
BP	M phase	10492558, 10452709, 10352767, 10591556, 10440794, 10525591, 10483401, 10538832, 10459755, 10548699, 10352048, 10350392, 10541729, 10359890, 10377405, 10487340, 10594774, 10477187, 10591781, 10474902, 10474984, 10352709, 10478160, 10420426, 10474769, 10504957, 10499366, 10462632, 10458195, 10462866, 10515744, 10478572, 10421029, 10419323, 10360985, 10568714, 10547943, 10451805, 10516246, 10400589,…	5.12528e-51
BP	cell cycle phase	10492558, 10452709, 10352767, 10591556, 10440794, 10525591, 10483401, 10538832, 10459755, 10548699, 10352048, 10350392, 10541729, 10359890, 10377405, 10487340, 10594774, 10477187, 10591781, 10474902, 10528077, 10474984, 10352709, 10478160, 10420426, 10474769, 10504957, 10499366, 10462632, 10458195, 10462866, 10515744, 10478572, 10421029, 10419323, 10360985, 10568714, 10547943, 10451805, 10516246,…	7.87079e-50
BP	cell division	10492558, 10452709, 10352767, 10591556, 10440794, 10525591, 10483401, 10538832, 10459755, 10548699, 10350392, 10541729, 10359890, 10377405, 10487340, 10594774, 10591781, 10474984, 10352709, 10478160, 10554445, 10420426, 10474769, 10504957, 10499639, 10499366, 10462632, 10458195, 10462866, 10515744, 10478572, 10421029, 10438378, 10523281, 10547943, 10451805, 10516246, 10400589, 10390707, 10448506,…	1.83975e-49
BP	cell cycle process	10492558, 10452709, 10352767, 10591556, 10440794, 10525591, 10483401, 10538832, 10459755, 10548699, 10352048, 10541729, 10350392, 10359890, 10377405, 10487340, 10371770, 10594774, 10477187, 10591781, 10474902, 10528077, 10474984, 10352709, 10478160, 10420426, 10474769, 10504957, 10499366, 10462632, 10458195, 10462866, 10515744, 10478572, 10421029, 10419323, 10360985, 10568714, 10547943, 10451805,…	2.14077e-49
BP	M phase of mitotic cell cycle	10492558, 10452709, 10352767, 10591556, 10440794, 10525591, 10483401, 10538832, 10459755, 10548699, 10350392, 10541729, 10359890, 10377405, 10487340, 10594774, 10591781, 10474984, 10352709, 10478160, 10420426, 10474769, 10504957, 10499366, 10462632, 10458195, 10462866, 10515744, 10478572, 10421029, 10419323, 10360985, 10547943, 10516246, 10451805, 10400589, 10448506, 10594426, 10411728, 10379127,…	2.42777e-49
BP	mitotic cell cycle	10492558, 10452709, 10352767, 10591556, 10440794, 10525591, 10483401, 10538832, 10459755, 10548699, 10350392, 10541729, 10359890, 10377405, 10487340, 10594774, 10591781, 10528077, 10474984, 10352709, 10478160, 10420426, 10474769, 10504957, 10499366, 10462632, 10458195, 10462866, 10515744, 10490104, 10478572, 10421029, 10419323, 10360985, 10547943, 10451805, 10516246, 10400589, 10448506, 10594426,…	2.55073e-48
BP	mitosis	10492558, 10452709, 10352767, 10591556, 10440794, 10525591, 10483401, 10538832, 10459755, 10548699, 10350392, 10541729, 10359890, 10377405, 10487340, 10594774, 10591781, 10474984, 10352709, 10478160, 10474769, 10420426, 10504957, 10499366, 10462632, 10458195, 10462866, 10515744, 10478572, 10421029, 10547943, 10516246, 10451805, 10400589, 10448506, 10594426, 10411728, 10379127, 10496204, 10465861,…	1.13083e-46
BP	nuclear division	10492558, 10452709, 10352767, 10591556, 10440794, 10525591, 10483401, 10538832, 10459755, 10548699, 10350392, 10541729, 10359890, 10377405, 10487340, 10594774, 10591781, 10474984, 10352709, 10478160, 10474769, 10420426, 10504957, 10499366, 10462632, 10458195, 10462866, 10515744, 10478572, 10421029, 10547943, 10516246, 10451805, 10400589, 10448506, 10594426, 10411728, 10379127, 10496204, 10465861,…	1.13083e-46
BP	organelle fission	10492558, 10452709, 10352767, 10591556, 10440794, 10525591, 10483401, 10538832, 10459755, 10548699, 10350392, 10541729, 10359890, 10377405, 10487340, 10594774, 10591781, 10474984, 10352709, 10478160, 10474769, 10420426, 10504957, 10499366, 10462632, 10458195, 10462866, 10515744, 10478572, 10421029, 10547943, 10516246, 10451805, 10400589, 10448506, 10594426, 10411728, 10379127, 10496204, 10465861,…	5.04455e-46
BP	chromosome segregation	10492558, 10352709, 10496204, 10452709, 10352767, 10465861, 10420426, 10483401, 10474381, 10382998, 10360985, 10538832, 10524790, 10499366, 10459755, 10451805, 10359890, 10390707, 10346365, 10411728, 10474984	5.0117e-21
BP	DNA metabolic process	10438378, 10508151, 10428672, 10524169, 10353420, 10352048, 10367076, 10390707, 10584710, 10564978, 10474902, 10435581, 10399391, 10528077, 10568150, 10503264, 10546834, 10420877, 10572906, 10361110, 10465282, 10394978, 10465912, 10533090, 10578690, 10389395, 10515257, 10591369	2.87503e-11
MF	ATP binding	10492558, 10478572, 10352767, 10601011, 10491805, 10524266, 10353420, 10350297, 10548699, 10377405, 10504470, 10390707, 10564978, 10590494, 10435581, 10474902, 10384373, 10388234, 10568150, 10496204, 10398173, 10557156, 10462796, 10474769, 10474381, 10369815, 10487480, 10504957, 10594251, 10428763, 10524790, 10572906, 10454709, 10462632, 10515431, 10606071, 10533090, 10587508, 10490104, 10389395,…	9.84263e-11
MF	adenyl nucleotide binding	10492558, 10478572, 10352767, 10601011, 10491805, 10524266, 10353420, 10350297, 10548699, 10377405, 10504470, 10390707, 10564978, 10590494, 10435581, 10474902, 10384373, 10388234, 10568150, 10496204, 10398173, 10557156, 10462796, 10474769, 10474381, 10369815, 10487480, 10504957, 10594251, 10428763, 10524790, 10572906, 10454709, 10462632, 10515431, 10606071, 10533090, 10587508, 10490104, 10389395,…	1.07698e-10
MF	adenyl ribonucleotide binding	10492558, 10478572, 10352767, 10601011, 10491805, 10524266, 10353420, 10350297, 10548699, 10377405, 10504470, 10390707, 10564978, 10590494, 10435581, 10474902, 10384373, 10388234, 10568150, 10496204, 10398173, 10557156, 10462796, 10474769, 10474381, 10369815, 10487480, 10504957, 10594251, 10428763, 10524790, 10572906, 10454709, 10462632, 10515431, 10606071, 10533090, 10587508, 10490104, 10389395,…	1.25049e-10
MF	purine nucleoside binding	10492558, 10478572, 10352767, 10601011, 10491805, 10524266, 10353420, 10350297, 10548699, 10377405, 10504470, 10390707, 10564978, 10590494, 10435581, 10474902, 10384373, 10388234, 10568150, 10496204, 10398173, 10557156, 10462796, 10474769, 10474381, 10369815, 10487480, 10504957, 10594251, 10428763, 10524790, 10572906, 10454709, 10462632, 10515431, 10606071, 10533090, 10587508, 10490104, 10389395,…	1.35892e-10
MF	nucleoside binding	10492558, 10478572, 10352767, 10601011, 10491805, 10524266, 10353420, 10350297, 10548699, 10377405, 10504470, 10390707, 10564978, 10590494, 10435581, 10474902, 10384373, 10388234, 10568150, 10496204, 10398173, 10557156, 10462796, 10474769, 10474381, 10369815, 10487480, 10504957, 10594251, 10428763, 10524790, 10572906, 10454709, 10462632, 10515431, 10606071, 10533090, 10587508, 10490104, 10389395,…	1.56963e-10
MF	microtubule motor activity	10568150, 10462632, 10350297, 10496204, 10515431, 10601011, 10462796, 10474381, 10590494, 10594251, 10454709	2.07108e-10
BP	microtubule-based process	10568150, 10496204, 10452709, 10601011, 10462796, 10483401, 10474381, 10382998, 10594251, 10454709, 10350297, 10462632, 10359890, 10515431, 10521090, 10477187, 10590494, 10474984	7.69498e-10
BP	DNA replication	10503264, 10438378, 10428672, 10524169, 10572906, 10353420, 10361110, 10465282, 10394978, 10367076, 10533090, 10465912, 10564978, 10435581, 10474902, 10528077	3.99079e-09
MF	purine nucleotide binding	10492558, 10478572, 10352767, 10601011, 10491805, 10523281, 10524266, 10353420, 10350297, 10548699, 10377405, 10504470, 10390707, 10564978, 10590494, 10435581, 10474902, 10384373, 10388234, 10568150, 10496204, 10398173, 10557156, 10462796, 10474769, 10474381, 10369815, 10487480, 10504957, 10594251, 10428763, 10524790, 10572906, 10454709, 10462632, 10515431, 10606071, 10533090, 10587508, 10490104,…	1.35339e-08
MF	ribonucleotide binding	10492558, 10478572, 10352767, 10601011, 10491805, 10523281, 10524266, 10353420, 10350297, 10548699, 10377405, 10504470, 10390707, 10564978, 10590494, 10435581, 10474902, 10384373, 10388234, 10568150, 10496204, 10398173, 10557156, 10462796, 10474769, 10474381, 10369815, 10487480, 10504957, 10594251, 10428763, 10524790, 10572906, 10454709, 10462632, 10515431, 10606071, 10533090, 10587508, 10490104,…	1.71048e-08
MF	purine ribonucleotide binding	10492558, 10478572, 10352767, 10601011, 10491805, 10523281, 10524266, 10353420, 10350297, 10548699, 10377405, 10504470, 10390707, 10564978, 10590494, 10435581, 10474902, 10384373, 10388234, 10568150, 10496204, 10398173, 10557156, 10462796, 10474769, 10474381, 10369815, 10487480, 10504957, 10594251, 10428763, 10524790, 10572906, 10454709, 10462632, 10515431, 10606071, 10533090, 10587508, 10490104,…	1.71048e-08
BP	cytokinesis	10554445, 10377405, 10465861, 10382998, 10591781, 10432511, 10524790, 10474984	9.89179e-08
MF	motor activity	10568150, 10462632, 10350297, 10496204, 10515431, 10601011, 10462796, 10474381, 10590494, 10594251, 10454709	1.0405e-07
BP	microtubule-based movement	10568150, 10462632, 10350297, 10496204, 10515431, 10601011, 10462796, 10474381, 10590494, 10594251, 10454709	1.41717e-07
MF	nucleotide binding	10492558, 10478572, 10352767, 10601011, 10524169, 10491805, 10523281, 10524266, 10353420, 10350297, 10548699, 10377405, 10504470, 10390707, 10564978, 10590494, 10435581, 10474902, 10384373, 10388234, 10568150, 10496204, 10398173, 10557156, 10462796, 10474769, 10474381, 10369815, 10487480, 10504957, 10594251, 10428763, 10524790, 10572906, 10454709, 10462632, 10515431, 10606071, 10533090, 10587508,…	6.86989e-07
BP	regulation of cell cycle	10496204, 10503264, 10508151, 10369815, 10382998, 10360985, 10491805, 10538832, 10424188, 10521090, 10594426, 10408321, 10584710, 10528077, 10474984	1.30057e-06
BP	response to DNA damage stimulus	10568150, 10508151, 10546834, 10369815, 10420877, 10524169, 10524266, 10352048, 10361110, 10465912, 10584710, 10578690, 10564978, 10389395, 10435581, 10399391, 10474902, 10515257	1.30863e-06
BP	chromosome condensation	10492558, 10547943, 10487340, 10390707, 10504957, 10474984	3.5465e-06
BP	DNA repair	10568150, 10508151, 10546834, 10420877, 10524169, 10352048, 10465912, 10584710, 10578690, 10564978, 10389395, 10435581, 10399391, 10474902, 10515257	6.42425e-06
BP	mitotic sister chromatid segregation	10492558, 10352767, 10474381, 10538832, 10524790, 10474984	7.10949e-06
BP	sister chromatid segregation	10492558, 10352767, 10474381, 10538832, 10524790, 10474984	9.70939e-06
MF	protein serine/threonine kinase activity	10398173, 10352767, 10557156, 10474769, 10369815, 10487480, 10491805, 10524790, 10524266, 10377405, 10504470, 10587508, 10490104, 10528077, 10388234, 10480432	1.49655e-05
BP	microtubule cytoskeleton organization	10452709, 10496204, 10359890, 10521090, 10462796, 10483401, 10474381, 10477187, 10382998, 10474984	1.57789e-05
BP	regulation of mitotic cell cycle	10496204, 10424188, 10594426, 10369815, 10382998, 10360985, 10528077, 10538832, 10474984	2.81806e-05
BP	chromosome organization	10492558, 10352767, 10474381, 10504957, 10538832, 10524790, 10547943, 10520521, 10487340, 10390707, 10346365, 10411728, 10584710, 10564978, 10515257, 10388234, 10591369, 10474984	5.33293e-05
BP	cellular response to stress	10568150, 10508151, 10546834, 10369815, 10420877, 10524169, 10524266, 10352048, 10361110, 10465912, 10584710, 10578690, 10564978, 10389395, 10435581, 10399391, 10474902, 10515257	6.41576e-05
MF	DNA binding	10601011, 10508151, 10428672, 10366277, 10395457, 10524169, 10542079, 10353420, 10352048, 10400589, 10390707, 10584710, 10564978, 10474902, 10435581, 10399391, 10388234, 10474984, 10568150, 10546834, 10420877, 10572906, 10371591, 10520521, 10465282, 10563780, 10606071, 10465912, 10533090, 10578690, 10389395, 10515257, 10591369	7.81924e-05
BP	DNA packaging	10492558, 10547943, 10520521, 10487340, 10390707, 10584710, 10504957, 10474984	0.00013494
BP	cell cycle checkpoint	10496204, 10508151, 10594426, 10369815, 10584710, 10382998, 10538832	0.000170601
BP	DNA-dependent DNA replication	10353420, 10503264, 10438378, 10367076, 10474902, 10572906	0.000253162
BP	regulation of cell cycle process	10496204, 10382998, 10491805, 10360985, 10528077, 10538832, 10474984	0.00029384
MF	protein kinase activity	10398173, 10352767, 10557156, 10474769, 10369815, 10487480, 10491805, 10524790, 10524266, 10377405, 10504470, 10587508, 10490104, 10528077, 10388234, 10480432	0.000467753
BP	regulation of microtubule-based process	10496204, 10521090, 10420426, 10491805, 10360985, 10459755	0.000489209
BP	DNA replication initiation	10353420, 10503264, 10438378, 10572906	0.000537302
BP	organelle localization	10350392, 10521090, 10474381, 10382998, 10360985, 10474984	0.000774421
MF	tubulin binding	10474381, 10379127, 10382998, 10432511, 10459755, 10474984	0.0010357
BP	meiosis	10352048, 10451805, 10352767, 10346365, 10584710, 10474902, 10568714	0.0017102
BP	M phase of meiotic cell cycle	10352048, 10451805, 10352767, 10346365, 10584710, 10474902, 10568714	0.0017102
BP	meiotic cell cycle	10352048, 10451805, 10352767, 10346365, 10584710, 10474902, 10568714	0.00195856
BP	cytoskeleton organization	10452709, 10496204, 10359890, 10521090, 10462796, 10483401, 10421877, 10474381, 10477187, 10382998, 10432511, 10474984	0.00230043
BP	negative regulation of DNA metabolic process	10508151, 10546834, 10408321, 10564978	0.00278924
MF	microtubule binding	10474381, 10379127, 10382998, 10459755, 10474984	0.00352435
MF	damaged DNA binding	10420877, 10584710, 10578690, 10474902	0.0049
BP	maintenance of location in cell	10496204, 10359890, 10350392, 10521090	0.00519007
BP	establishment of chromosome localization	10474381, 10382998, 10360985	0.0057625
BP	chromosome localization	10474381, 10382998, 10360985	0.0057625
BP	positive regulation of cell cycle	10496204, 10382998, 10360985, 10474984	0.00593526
MF	DNA-directed DNA polymerase activity	10465282, 10420877, 10524169, 10435581	0.00605538
BP	mitotic cell cycle checkpoint	10496204, 10594426, 10369815, 10538832	0.00674123
MF	DNA polymerase activity	10465282, 10420877, 10524169, 10435581	0.00736053
BP	spindle checkpoint	10496204, 10382998, 10538832	0.00759762
BP	spindle organization	10452709, 10521090, 10483401, 10477187	0.00760916
BP	maintenance of location	10496204, 10359890, 10350392, 10521090	0.0105949
BP	establishment of organelle localization	10474381, 10382998, 10360985, 10474984	0.0105949
MF	DNA-dependent ATPase activity	10533090, 10564978, 10389395, 10474902	0.0113058
BP	double-strand break repair via homologous recombination	10584710, 10474902, 10515257	0.0144314
BP	recombinational repair	10584710, 10474902, 10515257	0.0144314
BP	regulation of microtubule cytoskeleton organization	10496204, 10420426, 10491805, 10459755	0.0154961
BP	DNA recombination	10352048, 10584710, 10564978, 10474902, 10515257	0.0212408
BP	protein amino acid phosphorylation	10398173, 10352767, 10557156, 10474769, 10369815, 10487480, 10491805, 10524790, 10524266, 10377405, 10504470, 10587508, 10490104, 10388234, 10480432	0.0215929
BP	phosphorus metabolic process	10352767, 10398173, 10557156, 10474769, 10369815, 10487480, 10491805, 10524790, 10524266, 10366043, 10458195, 10377405, 10504470, 10414315, 10587508, 10490104, 10388234, 10480432	0.0369992
BP	phosphate metabolic process	10352767, 10398173, 10557156, 10474769, 10369815, 10487480, 10491805, 10524790, 10524266, 10366043, 10458195, 10377405, 10504470, 10414315, 10587508, 10490104, 10388234, 10480432	0.0369992
BP	maintenance of protein location in cell	10496204, 10359890, 10521090	0.0371416
MF	nucleotidyltransferase activity	10465282, 10367076, 10420877, 10524169, 10435581	0.0386828
MF	flap endonuclease activity	10352048, 10465912	0.0398076
MF	kinetochore binding	10496204, 10411728	0.0398076
BP	regulation of DNA metabolic process	10508151, 10546834, 10408321, 10564978	0.0411976
BP	interphase of mitotic cell cycle	10424188, 10382998, 10360985, 10528077	0.0411976
BP	interphase	10424188, 10382998, 10360985, 10528077	0.0459435
MF	magnesium ion binding	10524266, 10352048, 10352767, 10377405, 10465912, 10372082, 10399391, 10384373, 10388234	0.0482643
BP	regulation of organelle organization	10496204, 10420426, 10491805, 10538832, 10459755, 10474984	0.0498039
E13.5 ♂+♀ supporting cell enriched
Category	Term	Transcript cluster IDs	p-value
MF	GTPase activator activity	10504902, 10455259, 10530100, 10442968	0.0202285
MF	enzyme activator activity	10504902, 10455259, 10530100, 10442968	0.0369985
E13.5 ♂+♀ supporting cell depleted
Category	Term	Transcript cluster IDs	p-value
MF	ATP binding	10570982, 10601942, 10350753, 10402708	0.022632
MF	adenyl ribonucleotide binding	10570982, 10601942, 10350753, 10402708	0.023116
MF	adenyl nucleotide binding	10570982, 10601942, 10350753, 10402708	0.0258889
MF	purine nucleoside binding	10570982, 10601942, 10350753, 10402708	0.0264135
MF	nucleoside binding	10570982, 10601942, 10350753, 10402708	0.0267446
MF	ribonucleotide binding	10570982, 10601942, 10350753, 10402708	0.0405102
MF	purine ribonucleotide binding	10570982, 10601942, 10350753, 10402708	0.0405102
MF	purine nucleotide binding	10570982, 10601942, 10350753, 10402708	0.0443494
E13.5 ♂ supporting cell enriched
Category	Term	Transcript cluster IDs	p-value
BP	biological adhesion	10382328, 10419790, 10585048, 10581890, 10407955, 10442327, 10363676, 10448307, 10387505, 10408850, 10450579, 10545538, 10381006, 10362138, 10523717, 10549594, 10470775, 10560709, 10571530, 10513061, 10473814, 10369307, 10584827, 10436608, 10345241, 10421269, 10553450, 10561187, 10475027, 10424140, 10435193, 10491313, 10515613, 10362201	9.08261e-07
BP	cell adhesion	10382328, 10419790, 10585048, 10581890, 10407955, 10442327, 10363676, 10448307, 10387505, 10408850, 10450579, 10545538, 10381006, 10362138, 10523717, 10549594, 10470775, 10560709, 10571530, 10513061, 10473814, 10369307, 10584827, 10436608, 10345241, 10421269, 10553450, 10561187, 10475027, 10424140, 10435193, 10491313, 10515613, 10362201	9.08261e-07
BP	positive regulation of developmental process	10440738, 10416057, 10421853, 10546450, 10401673, 10415651, 10372069, 10572130, 10546454, 10450154, 10546452, 10546434, 10534324, 10448307, 10546432, 10497548, 10385036, 10406205, 10524955, 10362138, 10589368, 10594447	0.000103973
BP	ion transport	10530503, 10522368, 10416023, 10431874, 10490989, 10535231, 10443021, 10364402, 10557165, 10475990, 10412773, 10366004, 10387505, 10345855, 10549594, 10511631, 10500685, 10584883, 10525439, 10600210, 10588592, 10352798, 10383799, 10557177, 10497862, 10475567, 10564631, 10520187, 10548051	0.000362152
MF	endopeptidase inhibitor activity	10476906, 10398025, 10446986, 10488404, 10488415, 10561712, 10476924, 10533085, 10488409, 10355984	0.000376165
BP	positive regulation of cell differentiation	10440738, 10416057, 10546450, 10401673, 10372069, 10572130, 10546454, 10546452, 10546434, 10450154, 10534324, 10448307, 10546432, 10497548, 10385036, 10524955, 10362138, 10589368, 10594447	0.000427821
MF	peptidase inhibitor activity	10476906, 10398025, 10446986, 10488404, 10488415, 10561712, 10476924, 10533085, 10488409, 10355984	0.000679495
MF	protein dimerization activity	10451613, 10585048, 10504349, 10585874, 10368566, 10438708, 10422844, 10497214, 10534324, 10526087, 10433096, 10357155, 10558410, 10444056, 10425601, 10492522, 10460221, 10381006, 10409278, 10357878, 10605338, 10567108, 10497285	0.000757897
MF	calcium ion binding	10413726, 10596893, 10518069, 10407955, 10513362, 10535231, 10557165, 10438708, 10454254, 10517655, 10486119, 10540085, 10509910, 10394186, 10348194, 10379795, 10588592, 10557177, 10417628, 10571530, 10533529, 10369307, 10497214, 10497862, 10475567, 10526087, 10345241, 10573939, 10553450, 10401454, 10509838, 10409345, 10524955, 10506929, 10462922, 10370037	0.000781443
MF	protein homodimerization activity	10451613, 10585048, 10368566, 10497214, 10422844, 10438708, 10357155, 10526087, 10558410, 10444056, 10460221, 10492522, 10381006, 10605338, 10497285	0.00152251
BP	peripheral nervous system development	10373313, 10380896, 10430458, 10373467, 10422844, 10448967	0.00231529
MF	growth factor activity	10364903, 10604751, 10561187, 10401673, 10415651, 10535043, 10422844, 10357155, 10362201, 10385036	0.00235432
BP	cell-cell adhesion	10382328, 10585048, 10560709, 10442327, 10571530, 10363676, 10369307, 10545538, 10381006, 10362138, 10549594, 10491313, 10362201, 10515613	0.00237433
MF	identical protein binding	10412100, 10451613, 10585048, 10368566, 10442327, 10438708, 10422844, 10497214, 10526087, 10357155, 10605766, 10558410, 10444056, 10460221, 10492522, 10381006, 10491313, 10605338, 10497285	0.00277886
BP	sodium ion transport	10387505, 10345855, 10431874, 10600210, 10557165, 10500685, 10412773, 10475567	0.00289101
MF	enzyme inhibitor activity	10476906, 10398025, 10381697, 10446986, 10488404, 10524955, 10488415, 10561712, 10476924, 10533085, 10488409, 10355984	0.00330812
BP	ion homeostasis	10416023, 10525439, 10559558, 10456745, 10557177, 10557165, 10364402, 10585874, 10507784, 10373313, 10345855, 10574023, 10380896, 10524955, 10357878, 10463355, 10491313	0.00359493
BP	phosphorus metabolic process	10357579, 10545588, 10401673, 10499811, 10456745, 10443021, 10534324, 10441565, 10488678, 10483856, 10459747, 10576569, 10344750, 10450579, 10380896, 10599976, 10486564, 10357878, 10373467, 10594447, 10447294, 10581813, 10412100, 10435383, 10548735, 10429754, 10602428, 10420957, 10441456, 10557177, 10533529, 10443408, 10558410, 10355278, 10475027, 10602198, 10401997, 10515295, 10462922, 10561104,…	0.00377388
BP	phosphate metabolic process	10357579, 10545588, 10401673, 10499811, 10456745, 10443021, 10534324, 10441565, 10488678, 10483856, 10459747, 10576569, 10344750, 10450579, 10380896, 10599976, 10486564, 10357878, 10373467, 10594447, 10447294, 10581813, 10412100, 10435383, 10548735, 10429754, 10602428, 10420957, 10441456, 10557177, 10533529, 10443408, 10558410, 10355278, 10475027, 10602198, 10401997, 10515295, 10462922, 10561104,…	0.00377388
BP	metal ion transport	10522368, 10431874, 10416023, 10490989, 10525439, 10600210, 10588592, 10352798, 10383799, 10557177, 10557165, 10497862, 10475567, 10412773, 10366004, 10387505, 10345855, 10500685, 10548051	0.00411395
MF	cysteine-type endopeptidase inhibitor activity	10476906, 10488404, 10488415, 10476924, 10488409	0.00506557
BP	protein amino acid phosphorylation	10357579, 10401673, 10499811, 10456745, 10534324, 10441565, 10483856, 10576569, 10459747, 10344750, 10450579, 10380896, 10486564, 10357878, 10373467, 10594447, 10447294, 10581813, 10412100, 10429754, 10602428, 10420957, 10557177, 10533529, 10443408, 10558410, 10355278, 10475027, 10602198, 10515295, 10462922, 10561104, 10491136	0.00507894
BP	enzyme linked receptor protein signaling pathway	10412100, 10440738, 10401673, 10415651, 10581890, 10420957, 10456745, 10422844, 10385036, 10558410, 10450579, 10380896, 10355278, 10492522, 10561104, 10373467, 10535043, 10362201	0.00561597
BP	positive regulation of cell projection organization	10440738, 10401673, 10589368, 10448307, 10534324	0.00564767
BP	positive regulation of axonogenesis	10440738, 10589368, 10448307, 10534324	0.00589333
BP	cell projection organization	10536297, 10423520, 10419790, 10416057, 10348194, 10565634, 10378549, 10422844, 10369307, 10345241, 10411519, 10494174, 10380896, 10398267, 10545538, 10377215, 10549594, 10535043	0.00621303
BP	nitrogen compound biosynthetic process	10525439, 10499666, 10553015, 10499811, 10437364, 10443021, 10587639, 10366004, 10387505, 10509838, 10530319, 10349932, 10605338, 10500685, 10466410, 10440929, 10496727	0.0065747
BP	cell-substrate adhesion	10421269, 10419790, 10561187, 10407955, 10549594, 10448307, 10362201	0.00676907
BP	cellular ion homeostasis	10416023, 10525439, 10559558, 10456745, 10557177, 10364402, 10585874, 10507784, 10373313, 10574023, 10380896, 10524955, 10357878, 10463355, 10491313	0.00804553
MF	anion transmembrane transporter activity	10520187, 10549594, 10535231, 10511631, 10364402, 10475990, 10412773, 10564631	0.0080696
BP	neuron projection development	10536297, 10423520, 10416057, 10348194, 10378549, 10422844, 10345241, 10411519, 10494174, 10380896, 10398267, 10545538, 10377215	0.00961598
MF	alkali metal ion binding	10387505, 10431874, 10600210, 10352798, 10404885, 10500685, 10548051, 10412773, 10475567, 10497285	0.00966557
BP	phosphorylation	10357579, 10545588, 10401673, 10499811, 10456745, 10443021, 10534324, 10441565, 10483856, 10459747, 10576569, 10344750, 10450579, 10380896, 10486564, 10357878, 10373467, 10594447, 10447294, 10581813, 10412100, 10429754, 10602428, 10420957, 10557177, 10533529, 10443408, 10558410, 10355278, 10475027, 10602198, 10515295, 10462922, 10561104, 10491136	0.00979533
BP	cellular chemical homeostasis	10416023, 10525439, 10559558, 10456745, 10557177, 10364402, 10585874, 10507784, 10373313, 10574023, 10380896, 10524955, 10357878, 10463355, 10491313	0.00999266
BP	neuron development	10536297, 10423520, 10416057, 10348194, 10565634, 10378549, 10422844, 10369307, 10345241, 10411519, 10494174, 10380896, 10398267, 10545538, 10377215	0.011096
MF	hydrolase activity, acting on carbon-nitrogen (but not peptide) bonds, in linear amidines	10487011, 10509838, 10496727	0.0117889
BP	cation transport	10522368, 10431874, 10416023, 10490989, 10525439, 10600210, 10588592, 10352798, 10383799, 10557177, 10443021, 10557165, 10497862, 10475567, 10412773, 10366004, 10387505, 10345855, 10500685, 10548051	0.01205
BP	transmembrane receptor protein tyrosine kinase signaling pathway	10440738, 10415651, 10581890, 10420957, 10422844, 10385036, 10380896, 10450579, 10355278, 10492522, 10561104, 10373467, 10362201	0.0121708
BP	regulation of cell growth	10463476, 10507784, 10450579, 10446986, 10558150, 10448307, 10534324, 10362201	0.0134023
BP	skeletal system development	10463476, 10382328, 10421853, 10401673, 10380622, 10415651, 10585874, 10483856, 10385036, 10373313, 10492522, 10381006, 10495285, 10523717, 10567108, 10362201	0.0139649
BP	regulation of membrane potential	10373313, 10380896, 10525439, 10456745, 10357878, 10463355, 10491313, 10585874, 10364402	0.0147482
MF	scavenger receptor activity	10416023, 10516735, 10495854, 10584870	0.0153645
BP	regulation of growth	10463476, 10446986, 10588592, 10372069, 10415651, 10558150, 10589494, 10448307, 10436608, 10534324, 10408850, 10507784, 10450579, 10605338, 10362201	0.0164904
BP	bone development	10382328, 10463476, 10373313, 10415651, 10381006, 10495285, 10523717, 10362201, 10385036	0.017162
BP	purine nucleotide biosynthetic process	10387505, 10499666, 10530319, 10499811, 10443021, 10437364, 10500685, 10440929, 10587639, 10366004	0.0175179
BP	cellular homeostasis	10416023, 10525439, 10559558, 10456745, 10480921, 10557177, 10585874, 10364402, 10507784, 10373313, 10574023, 10380896, 10599976, 10524955, 10357878, 10463355, 10491313, 10439218	0.0176447
BP	regulation of vascular endothelial growth factor receptor signaling pathway	10421853, 10415651, 10385036	0.0178278
BP	cartilage development	10382328, 10421853, 10415651, 10381006, 10567108, 10362201, 10385036	0.0182836
MF	anion:anion antiporter activity	10520187, 10511631, 10412773	0.0190566
BP	ear morphogenesis	10368918, 10420846, 10415651, 10565634, 10369307, 10483856	0.0223269
MF	sodium ion binding	10387505, 10431874, 10600210, 10500685, 10412773, 10475567	0.0228942
MF	insulin-like growth factor binding	10463476, 10446986, 10558150, 10362201	0.023757
MF	L-amino acid transmembrane transporter activity	10431874, 10582275, 10364402, 10535852	0.023757
BP	ossification	10463476, 10373313, 10415651, 10381006, 10495285, 10523717, 10362201, 10385036	0.0239062
BP	lipid catabolic process	10507784, 10415021, 10572130, 10517655, 10462922, 10376208, 10486119, 10585874, 10464328	0.0244188
BP	chemical homeostasis	10416023, 10525439, 10559558, 10456745, 10557177, 10557165, 10364402, 10585874, 10507784, 10373313, 10345855, 10574023, 10380896, 10524955, 10357878, 10463355, 10491313	0.0245388
BP	nucleotide biosynthetic process	10387505, 10499666, 10530319, 10499811, 10443021, 10437364, 10605338, 10500685, 10440929, 10587639, 10366004	0.0245877
MF	endopeptidase activity	10409857, 10516735, 10546450, 10519140, 10495854, 10558150, 10546454, 10546452, 10546434, 10581882, 10438708, 10546432, 10587733, 10584870, 10505489, 10435193, 10410124, 10410477, 10370037	0.0247224
BP	neuron differentiation	10536297, 10423520, 10416057, 10348194, 10565634, 10378549, 10422844, 10369307, 10345241, 10411519, 10494174, 10380896, 10398267, 10545538, 10377215, 10594447, 10576332	0.0255157
BP	ear development	10368918, 10420846, 10450579, 10415651, 10565634, 10369307, 10483856	0.0262072
BP	development of primary male sexual characteristics	10382328, 10479423, 10432372, 10415651, 10524955, 10420362	0.0274622
BP	regulation of system process	10413726, 10588592, 10559558, 10589494, 10381006, 10456745, 10357878, 10500685, 10473814, 10422844, 10357155	0.0289384
MF	phosphatase activity	10435383, 10548735, 10441456, 10384015, 10488678, 10587639, 10558410, 10599976, 10501754, 10462504, 10401997, 10500685, 10594447, 10497285, 10515613	0.0294161
MF	protein kinase activity	10357579, 10499811, 10441565, 10534324, 10576569, 10459747, 10344750, 10450579, 10380896, 10486564, 10594447, 10373467, 10447294, 10581813, 10412100, 10507471, 10429754, 10602428, 10352798, 10420957, 10557177, 10533529, 10443408, 10355278, 10475027, 10602198, 10515295, 10561104, 10491136	0.0295895
BP	amine transport	10599008, 10431874, 10600210, 10582275, 10417628, 10364402, 10535852	0.0309107
MF	transmembrane receptor protein tyrosine kinase activity	10380896, 10450579, 10355278, 10475027, 10561104, 10373467	0.031302
BP	nucleobase, nucleoside, nucleotide and nucleic acid biosynthetic process	10387505, 10499666, 10530319, 10499811, 10443021, 10437364, 10605338, 10500685, 10440929, 10587639, 10366004	0.0321267
BP	nucleobase, nucleoside and nucleotide biosynthetic process	10387505, 10499666, 10530319, 10499811, 10443021, 10437364, 10605338, 10500685, 10440929, 10587639, 10366004	0.0321267
MF	antiporter activity	10520187, 10345855, 10511631, 10412773, 10475567	0.0329185
BP	di-, tri-valent inorganic cation transport	10522368, 10416023, 10525439, 10588592, 10383799, 10557177, 10497862, 10475567, 10366004	0.0335946
BP	cartilage condensation	10382328, 10381006, 10362201	0.035304
MF	protein tyrosine kinase activity	10576569, 10380896, 10450579, 10355278, 10475027, 10420957, 10561104, 10594447, 10373467, 10534324, 10581813	0.035522
MF	symporter activity	10599008, 10431874, 10600210, 10364402, 10475990, 10412773, 10475567	0.0357828
BP	male sex differentiation	10382328, 10479423, 10432372, 10415651, 10524955, 10420362	0.0364747
MF	transforming growth factor beta receptor binding	10364903, 10401673, 10422844	0.0376587
BP	male gonad development	10382328, 10479423, 10432372, 10415651, 10524955	0.0415058
BP	striated muscle cell development	10380896, 10588592, 10473814, 10436608, 10440993	0.0415058
BP	striated muscle cell differentiation	10380896, 10588592, 10495285, 10473814, 10436608, 10440993, 10381082	0.0418936
BP	amino acid transport	10599008, 10431874, 10600210, 10582275, 10364402, 10535852	0.0433838
BP	male sex determination	10382328, 10432372, 10415651	0.0457184
MF	serine-type endopeptidase inhibitor activity	10398025, 10446986, 10561712, 10533085, 10355984	0.0462208
MF	solute:solute antiporter activity	10520187, 10345855, 10511631, 10412773	0.0465604
BP	purine nucleotide metabolic process	10387505, 10499666, 10530319, 10499811, 10443021, 10437364, 10500685, 10440929, 10587639, 10366004	0.0466324
MF	inorganic anion transmembrane transporter activity	10520187, 10511631, 10475990	0.0487174
E13.5 ♂ supporting cell depleted
Category	Term	Transcript cluster IDs	p-value
BP	epithelial cell proliferation	10419261, 10522530, 10568436	0.00186429
BP	blood vessel morphogenesis	10586781, 10419261, 10410892, 10568436, 10497203	0.00365169
BP	limb morphogenesis	10419261, 10361065, 10568436, 10496091	0.00366421
BP	appendage morphogenesis	10419261, 10361065, 10568436, 10496091	0.00366421
BP	appendage development	10419261, 10361065, 10568436, 10496091	0.00393947
BP	limb development	10419261, 10361065, 10568436, 10496091	0.00393947
BP	mesoderm formation	10419261, 10568436, 10496091	0.0045555
BP	odontogenesis	10419261, 10587107, 10496091	0.00492264
MF	motor activity	10586781, 10587107, 10585982, 10354432	0.00505791
BP	formation of primary germ layer	10419261, 10568436, 10496091	0.005303
BP	mesoderm morphogenesis	10419261, 10568436, 10496091	0.005303
BP	blood vessel development	10586781, 10419261, 10410892, 10568436, 10497203	0.00768383
BP	enzyme linked receptor protein signaling pathway	10586781, 10419261, 10522530, 10467425, 10568436	0.00768383
BP	pigmentation	10522530, 10587107, 10403604	0.0078569
BP	regulation of striated muscle tissue development	10419261, 10568436, 10496091	0.00832686
BP	vasculature development	10586781, 10419261, 10410892, 10568436, 10497203	0.00853568
BP	regulation of muscle development	10419261, 10568436, 10496091	0.00880921
BP	vasculogenesis	10586781, 10410892, 10497203	0.0108604
BP	mesoderm development	10419261, 10568436, 10496091	0.0119577
BP	locomotory behavior	10522530, 10587107, 10385872, 10403604	0.0122227
BP	transmembrane receptor protein tyrosine kinase signaling pathway	10586781, 10522530, 10467425, 10568436	0.0154961
BP	growth	10419261, 10361065, 10587107, 10568436	0.0171329
BP	cell-cell signaling	10419261, 10587107, 10409737, 10568436	0.0174715
BP	gastrulation	10419261, 10568436, 10496091	0.0201948
BP	mammary gland development	10419261, 10568436, 10496091	0.0223539
BP	hemopoiesis	10586781, 10419261, 10361065, 10522530	0.022609
BP	regulation of branching involved in prostate gland morphogenesis	10419261, 10568436	0.0242302
BP	mesodermal cell differentiation	10419261, 10568436	0.0242302
BP	myeloid cell differentiation	10419261, 10361065, 10522530	0.0246047
MF	GTPase regulator activity	10590860, 10599120, 10410892, 10352194, 10585982, 10590844	0.0260775
MF	nucleoside-triphosphatase regulator activity	10590860, 10599120, 10410892, 10352194, 10585982, 10590844	0.0280413
MF	nucleotide binding	10432190, 10522530, 10606969, 10587107, 10585982, 10390209, 10568436, 10586781, 10599120, 10480347, 10352194, 10385872, 10354432	0.0282929
MF	ATP binding	10586781, 10432190, 10480347, 10522530, 10587107, 10352194, 10585982, 10385872, 10354432, 10568436	0.029367
BP	hemopoietic or lymphoid organ development	10586781, 10419261, 10361065, 10522530	0.0293919
MF	adenyl ribonucleotide binding	10586781, 10432190, 10480347, 10522530, 10587107, 10352194, 10585982, 10385872, 10354432, 10568436	0.0307023
BP	embryonic limb morphogenesis	10419261, 10361065, 10496091	0.0310365
BP	embryonic appendage morphogenesis	10419261, 10361065, 10496091	0.0310365
BP	immune system development	10586781, 10419261, 10361065, 10522530	0.0336342
BP	developmental growth	10419261, 10587107, 10568436	0.0353589
BP	cellular pigmentation	10587107, 10403604	0.0361313
BP	developmental growth involved in morphogenesis	10419261, 10568436	0.0361313
BP	branching involved in prostate gland morphogenesis	10419261, 10568436	0.0361313
BP	cell surface receptor linked signal transduction	10586781, 10419261, 10522530, 10467425, 10568436, 10497203, 10496091	0.0370168
BP	reproductive developmental process	10419261, 10522530, 10385872, 10568436	0.0376614
MF	adenyl nucleotide binding	10586781, 10432190, 10480347, 10522530, 10587107, 10352194, 10585982, 10385872, 10354432, 10568436	0.0388406
BP	chordate embryonic development	10586781, 10419261, 10361065, 10568436, 10496091	0.0396036
BP	kidney development	10586781, 10419261, 10568436	0.0399016
BP	negative regulation of striated muscle development	10419261, 10496091	0.040067
MF	purine nucleoside binding	10586781, 10432190, 10480347, 10522530, 10587107, 10352194, 10585982, 10385872, 10354432, 10568436	0.0404701
BP	embryonic development ending in birth or egg hatching	10586781, 10419261, 10361065, 10568436, 10496091	0.0407705
MF	purine ribonucleotide binding	10586781, 10432190, 10599120, 10480347, 10522530, 10587107, 10352194, 10585982, 10385872, 10354432, 10568436	0.041484
MF	ribonucleotide binding	10586781, 10432190, 10599120, 10480347, 10522530, 10587107, 10352194, 10585982, 10385872, 10354432, 10568436	0.041484
MF	nucleoside binding	10586781, 10432190, 10480347, 10522530, 10587107, 10352194, 10585982, 10385872, 10354432, 10568436	0.0415127
BP	negative regulation of muscle development	10419261, 10496091	0.0439871
MF	vitamin transporter activity	10385872, 10487906	0.0468185
BP	actin filament bundle formation	10432540, 10467425	0.0478918
BP	labyrinthine layer morphogenesis	10568436, 10496091	0.0478918
BP	vitamin transport	10385872, 10487906	0.0478918
BP	behavior	10522530, 10587107, 10385872, 10403604	0.049363
E13.5 ♀ supporting cell enriched
Category	Term	Transcript cluster IDs	p-value
MF	phosphoric diester hydrolase activity	10601044, 10487945, 10411171, 10389590, 10428619, 10441680, 10561306, 10368806	7.69688e-05
BP	oxidation reduction	10504606, 10545308, 10436978, 10531919, 10415176, 10403291, 10507328, 10359034, 10443898, 10355246, 10528929, 10459730, 10406270, 10449955, 10472757, 10510129, 10603746, 10400941, 10552418	0.00152025
BP	glycerol metabolic process	10601044, 10487945, 10389590, 10587988	0.00316032
BP	alditol metabolic process	10601044, 10487945, 10389590, 10587988	0.00383192
MF	glycerophosphodiester phosphodiesterase activity	10601044, 10487945, 10389590	0.00656743
BP	forebrain cell migration	10464391, 10506433, 10528583	0.0166992
BP	polyol metabolic process	10601044, 10487945, 10389590, 10587988	0.022571
BP	ion transport	10508052, 10569618, 10549282, 10382376, 10542317, 10438909, 10347697, 10344935, 10418355, 10407598, 10463462, 10438911, 10371321, 10487906, 10542310	0.0288654
MF	carbohydrate binding	10508012, 10487945, 10551638, 10428619, 10447951, 10482968, 10485405, 10482929	0.0295498
BP	organic acid transport	10514221, 10571444, 10498024, 10567964, 10487906	0.033585
BP	carboxylic acid transport	10514221, 10571444, 10498024, 10567964, 10487906	0.033585
BP	serine phosphorylation of STAT protein	10388884, 10528583	0.0403709
BP	galactosylceramide metabolic process	10401968, 10567964	0.0403709
BP	galactolipid metabolic process	10401968, 10567964	0.0403709
BP	serine phosphorylation of STAT3 protein	10388884, 10528583	0.0403709
MF	calcium ion binding	10499854, 10493995, 10569618, 10488771, 10607848, 10577164, 10486061, 10549282, 10601729, 10382376, 10447951, 10477920, 10418355, 10407598, 10457686, 10556583	0.0499098
E13.5 ♀ supporting cell depleted
Category	Term	Transcript cluster IDs	p-value
BP	cell cycle	10492558, 10452709, 10591556, 10508151, 10525591, 10483401, 10538832, 10459755, 10352048, 10541729, 10350392, 10359890, 10377405, 10487340, 10371770, 10477187, 10556266, 10594774, 10577508, 10591781, 10474902, 10528077, 10474984, 10586184, 10554445, 10420426, 10474769, 10504957, 10499366, 10550102, 10462632, 10458195, 10462866, 10515744, 10490104, 10534974, 10478572, 10421029, 10438378, 10419323,…	3.68176e-57
BP	M phase	10492558, 10452709, 10591556, 10525591, 10483401, 10538832, 10459755, 10352048, 10541729, 10350392, 10359890, 10377405, 10487340, 10556266, 10594774, 10477187, 10591781, 10474902, 10474984, 10586184, 10420426, 10474769, 10504957, 10499366, 10462632, 10458195, 10462866, 10515744, 10478572, 10421029, 10419323, 10385153, 10381072, 10360985, 10568714, 10547943, 10451805, 10516246, 10400589, 10588294,…	3.75523e-51
BP	cell cycle phase	10492558, 10452709, 10591556, 10525591, 10483401, 10538832, 10459755, 10352048, 10541729, 10350392, 10359890, 10377405, 10487340, 10556266, 10594774, 10477187, 10591781, 10474902, 10528077, 10474984, 10586184, 10420426, 10474769, 10504957, 10499366, 10462632, 10458195, 10462866, 10515744, 10478572, 10421029, 10419323, 10385153, 10381072, 10360985, 10568714, 10547943, 10451805, 10605674, 10516246,…	4.0205e-51
BP	cell cycle process	10492558, 10452709, 10591556, 10525591, 10483401, 10538832, 10459755, 10352048, 10541729, 10350392, 10359890, 10377405, 10487340, 10371770, 10556266, 10594774, 10477187, 10591781, 10474902, 10528077, 10474984, 10586184, 10420426, 10474769, 10504957, 10499366, 10462632, 10458195, 10462866, 10515744, 10478572, 10421029, 10419323, 10385153, 10381072, 10360985, 10568714, 10547943, 10451805, 10605674,…	4.80255e-49
BP	mitotic cell cycle	10492558, 10452709, 10591556, 10525591, 10483401, 10538832, 10459755, 10541729, 10350392, 10359890, 10377405, 10487340, 10556266, 10594774, 10591781, 10528077, 10474984, 10586184, 10420426, 10474769, 10504957, 10499366, 10462632, 10458195, 10462866, 10515744, 10490104, 10478572, 10421029, 10419323, 10385153, 10381072, 10360985, 10547943, 10451805, 10605674, 10516246, 10400589, 10592201, 10594426,…	1.03205e-48
BP	M phase of mitotic cell cycle	10492558, 10452709, 10591556, 10525591, 10483401, 10538832, 10459755, 10350392, 10541729, 10359890, 10377405, 10487340, 10556266, 10594774, 10591781, 10474984, 10586184, 10420426, 10474769, 10504957, 10499366, 10462632, 10458195, 10462866, 10515744, 10478572, 10421029, 10419323, 10385153, 10360985, 10381072, 10547943, 10451805, 10516246, 10400589, 10594426, 10411728, 10462973, 10379127, 10496204,…	1.50869e-48
BP	cell division	10492558, 10452709, 10591556, 10525591, 10483401, 10538832, 10459755, 10541729, 10350392, 10359890, 10377405, 10487340, 10556266, 10594774, 10591781, 10474984, 10586184, 10554445, 10420426, 10474769, 10504957, 10499366, 10550102, 10462632, 10458195, 10462866, 10515744, 10478572, 10421029, 10438378, 10385153, 10381072, 10523281, 10547943, 10451805, 10516246, 10400589, 10390707, 10346365, 10594426,…	7.57058e-47
BP	nuclear division	10492558, 10452709, 10591556, 10525591, 10483401, 10538832, 10459755, 10350392, 10541729, 10359890, 10377405, 10487340, 10556266, 10594774, 10591781, 10474984, 10586184, 10420426, 10474769, 10504957, 10499366, 10462632, 10458195, 10462866, 10515744, 10478572, 10421029, 10385153, 10381072, 10547943, 10516246, 10451805, 10400589, 10594426, 10411728, 10462973, 10379127, 10496204, 10465861, 10361375,…	5.64274e-46
BP	mitosis	10492558, 10452709, 10591556, 10525591, 10483401, 10538832, 10459755, 10350392, 10541729, 10359890, 10377405, 10487340, 10556266, 10594774, 10591781, 10474984, 10586184, 10420426, 10474769, 10504957, 10499366, 10462632, 10458195, 10462866, 10515744, 10478572, 10421029, 10385153, 10381072, 10547943, 10516246, 10451805, 10400589, 10594426, 10411728, 10462973, 10379127, 10496204, 10465861, 10361375,…	5.64274e-46
BP	organelle fission	10492558, 10452709, 10591556, 10525591, 10483401, 10538832, 10459755, 10350392, 10541729, 10359890, 10377405, 10487340, 10556266, 10594774, 10591781, 10474984, 10586184, 10420426, 10474769, 10504957, 10499366, 10462632, 10458195, 10462866, 10515744, 10478572, 10421029, 10385153, 10381072, 10547943, 10516246, 10451805, 10400589, 10594426, 10411728, 10462973, 10379127, 10496204, 10465861, 10361375,…	2.59522e-45
BP	DNA metabolic process	10534974, 10438378, 10428672, 10508151, 10555695, 10524169, 10381072, 10400649, 10353420, 10352048, 10605674, 10367076, 10437945, 10592201, 10390707, 10588294, 10446074, 10584710, 10564978, 10462973, 10399391, 10435581, 10474902, 10528077, 10568150, 10586184, 10546834, 10420877, 10572906, 10550102, 10361110, 10394978, 10573615, 10578690, 10389395, 10446027, 10515257, 10591369	1.45373e-18
BP	chromosome segregation	10492558, 10496204, 10452709, 10465861, 10385153, 10420426, 10483401, 10474381, 10382998, 10360985, 10538832, 10499366, 10459755, 10451805, 10359890, 10390707, 10346365, 10411728, 10474984	2.27415e-17
BP	DNA replication	10534974, 10438378, 10586184, 10428672, 10555695, 10524169, 10381072, 10400649, 10572906, 10550102, 10353420, 10605674, 10361110, 10394978, 10437945, 10367076, 10573615, 10564978, 10474902, 10435581, 10528077, 10446027	1.50977e-14
MF	nucleoside binding	10492558, 10555695, 10491805, 10350297, 10359851, 10437945, 10377405, 10504470, 10556266, 10590494, 10474902, 10474769, 10391811, 10594251, 10504957, 10416037, 10550102, 10462632, 10587508, 10490104, 10389395, 10515257, 10478572, 10534974, 10601011, 10381072, 10366004, 10353420, 10605674, 10592201, 10390707, 10462973, 10564978, 10435581, 10384373, 10388234, 10568150, 10496204, 10398173, 10557156,…	5.05656e-14
MF	ATP binding	10492558, 10555695, 10491805, 10350297, 10359851, 10437945, 10377405, 10504470, 10556266, 10590494, 10474902, 10474769, 10391811, 10594251, 10504957, 10416037, 10550102, 10462632, 10587508, 10490104, 10389395, 10515257, 10478572, 10534974, 10601011, 10381072, 10366004, 10353420, 10592201, 10390707, 10462973, 10564978, 10435581, 10384373, 10388234, 10568150, 10496204, 10398173, 10557156, 10462796,…	9.64789e-14
MF	adenyl ribonucleotide binding	10492558, 10555695, 10491805, 10350297, 10359851, 10437945, 10377405, 10504470, 10556266, 10590494, 10474902, 10474769, 10391811, 10594251, 10504957, 10416037, 10550102, 10462632, 10587508, 10490104, 10389395, 10515257, 10478572, 10534974, 10601011, 10381072, 10366004, 10353420, 10592201, 10390707, 10462973, 10564978, 10435581, 10384373, 10388234, 10568150, 10496204, 10398173, 10557156, 10462796,…	1.30391e-13
MF	adenyl nucleotide binding	10492558, 10555695, 10491805, 10350297, 10359851, 10437945, 10377405, 10504470, 10556266, 10590494, 10474902, 10474769, 10391811, 10594251, 10504957, 10416037, 10550102, 10462632, 10587508, 10490104, 10389395, 10515257, 10478572, 10534974, 10601011, 10381072, 10366004, 10353420, 10592201, 10390707, 10462973, 10564978, 10435581, 10384373, 10388234, 10568150, 10496204, 10398173, 10557156, 10462796,…	1.44467e-13
MF	purine nucleoside binding	10492558, 10555695, 10491805, 10350297, 10359851, 10437945, 10377405, 10504470, 10556266, 10590494, 10474902, 10474769, 10391811, 10594251, 10504957, 10416037, 10550102, 10462632, 10587508, 10490104, 10389395, 10515257, 10478572, 10534974, 10601011, 10381072, 10366004, 10353420, 10592201, 10390707, 10462973, 10564978, 10435581, 10384373, 10388234, 10568150, 10496204, 10398173, 10557156, 10462796,…	1.93144e-13
BP	microtubule-based process	10568150, 10496204, 10452709, 10601011, 10361375, 10462796, 10391811, 10385153, 10483401, 10474381, 10382998, 10594251, 10454709, 10350297, 10462632, 10359890, 10515431, 10521090, 10477187, 10590494, 10474984	5.36616e-12
MF	purine nucleotide binding	10492558, 10555695, 10491805, 10418480, 10350297, 10359851, 10437945, 10377405, 10504470, 10556266, 10590494, 10474902, 10474769, 10391811, 10594251, 10504957, 10416037, 10550102, 10462632, 10587508, 10490104, 10389395, 10515257, 10478572, 10534974, 10601011, 10381072, 10523281, 10366004, 10353420, 10592201, 10390707, 10462973, 10564978, 10435581, 10384373, 10388234, 10568150, 10496204, 10398173,…	2.07294e-11
MF	ribonucleotide binding	10492558, 10555695, 10491805, 10418480, 10350297, 10359851, 10437945, 10377405, 10504470, 10556266, 10590494, 10474902, 10474769, 10391811, 10594251, 10504957, 10416037, 10550102, 10462632, 10587508, 10490104, 10389395, 10515257, 10478572, 10534974, 10601011, 10381072, 10523281, 10366004, 10353420, 10592201, 10390707, 10462973, 10564978, 10435581, 10384373, 10388234, 10568150, 10496204, 10398173,…	2.16157e-11
MF	purine ribonucleotide binding	10492558, 10555695, 10491805, 10418480, 10350297, 10359851, 10437945, 10377405, 10504470, 10556266, 10590494, 10474902, 10474769, 10391811, 10594251, 10504957, 10416037, 10550102, 10462632, 10587508, 10490104, 10389395, 10515257, 10478572, 10534974, 10601011, 10381072, 10523281, 10366004, 10353420, 10592201, 10390707, 10462973, 10564978, 10435581, 10384373, 10388234, 10568150, 10496204, 10398173,…	2.16157e-11
MF	microtubule motor activity	10568150, 10462632, 10350297, 10496204, 10515431, 10601011, 10462796, 10391811, 10474381, 10590494, 10594251, 10454709	4.55699e-11
MF	nucleotide binding	10492558, 10555695, 10524169, 10491805, 10418480, 10350297, 10359851, 10437945, 10377405, 10504470, 10556266, 10590494, 10474902, 10474769, 10391811, 10594251, 10504957, 10416037, 10550102, 10462632, 10587508, 10389395, 10490104, 10515257, 10534974, 10478572, 10601011, 10381072, 10523281, 10366004, 10353420, 10605674, 10592201, 10390707, 10462973, 10564978, 10435581, 10384373, 10388234, 10568150,…	1.08028e-10
BP	response to DNA damage stimulus	10568150, 10586184, 10508151, 10546834, 10369815, 10420877, 10524169, 10550102, 10352048, 10605674, 10361110, 10592201, 10588294, 10446074, 10584710, 10578690, 10564978, 10389395, 10474902, 10435581, 10399391, 10446027, 10515257	1.36034e-09
BP	DNA repair	10568150, 10508151, 10546834, 10420877, 10524169, 10550102, 10352048, 10605674, 10592201, 10588294, 10446074, 10584710, 10578690, 10564978, 10389395, 10474902, 10435581, 10399391, 10446027, 10515257	3.69189e-09
BP	DNA-dependent DNA replication	10353420, 10534974, 10605674, 10586184, 10438378, 10437945, 10367076, 10474902, 10400649, 10572906	7.58146e-09
BP	microtubule-based movement	10568150, 10462632, 10350297, 10496204, 10515431, 10601011, 10462796, 10391811, 10474381, 10590494, 10594251, 10454709	2.92608e-08
MF	motor activity	10568150, 10462632, 10350297, 10496204, 10515431, 10601011, 10462796, 10391811, 10474381, 10590494, 10594251, 10454709	4.42067e-08
BP	cellular response to stress	10568150, 10586184, 10508151, 10546834, 10369815, 10420877, 10524169, 10376201, 10550102, 10352048, 10605674, 10361110, 10592201, 10588294, 10446074, 10584710, 10578690, 10564978, 10389395, 10474902, 10435581, 10399391, 10446027, 10515257	6.65961e-08
BP	chromosome condensation	10492558, 10547943, 10487340, 10390707, 10504957, 10399087, 10474984	1.66679e-07
BP	DNA packaging	10408200, 10492558, 10547943, 10520521, 10487340, 10390707, 10584710, 10462973, 10504957, 10399087, 10474984	3.76839e-07
BP	DNA replication initiation	10353420, 10534974, 10605674, 10438378, 10437945, 10572906	4.95775e-07
BP	microtubule cytoskeleton organization	10452709, 10496204, 10359890, 10521090, 10361375, 10462796, 10385153, 10483401, 10474381, 10477187, 10382998, 10474984	5.45818e-07
BP	regulation of cell cycle	10496204, 10586184, 10361375, 10508151, 10369815, 10382998, 10360985, 10491805, 10538832, 10521090, 10592201, 10594426, 10408321, 10584710, 10528077, 10474984	6.87593e-07
BP	cell cycle checkpoint	10496204, 10586184, 10508151, 10592201, 10594426, 10369815, 10584710, 10382998, 10538832	2.87661e-06
BP	cytokinesis	10554445, 10377405, 10465861, 10382998, 10591781, 10432511, 10474984	3.90144e-06
MF	DNA binding	10534974, 10601011, 10428672, 10508151, 10524169, 10542079, 10400649, 10408200, 10353420, 10352048, 10605674, 10437945, 10400589, 10390707, 10588294, 10446074, 10438626, 10584710, 10462973, 10564978, 10399391, 10435581, 10474902, 10388234, 10474984, 10568150, 10546834, 10420877, 10572906, 10550102, 10368508, 10371591, 10520521, 10563780, 10606071, 10573615, 10578690, 10389395, 10515257, 10591369	4.63823e-06
BP	regulation of cell cycle process	10496204, 10586184, 10361375, 10382998, 10491805, 10360985, 10528077, 10538832, 10474984	6.13422e-06
BP	chromosome organization	10492558, 10385153, 10474381, 10504957, 10538832, 10408200, 10547943, 10520521, 10487340, 10390707, 10346365, 10411728, 10584710, 10564978, 10462973, 10388234, 10515257, 10399087, 10591369, 10474984	1.39419e-05
MF	protein serine/threonine kinase activity	10398173, 10557156, 10474769, 10369815, 10487480, 10416037, 10491805, 10377405, 10592201, 10504470, 10482824, 10556266, 10587508, 10490104, 10528077, 10388234, 10480432	2.61932e-05
BP	regulation of mitotic cell cycle	10496204, 10361375, 10594426, 10369815, 10382998, 10360985, 10528077, 10538832, 10474984	5.31687e-05
BP	organelle localization	10350392, 10521090, 10385153, 10474381, 10382998, 10360985, 10474984	0.000131954
BP	establishment of chromosome localization	10385153, 10474381, 10382998, 10360985	0.000211491
BP	chromosome localization	10385153, 10474381, 10382998, 10360985	0.000211491
BP	negative regulation of DNA metabolic process	10586184, 10508151, 10546834, 10408321, 10564978	0.000229983
BP	mitotic sister chromatid segregation	10492558, 10385153, 10474381, 10538832, 10474984	0.000229983
BP	sister chromatid segregation	10492558, 10385153, 10474381, 10538832, 10474984	0.000291425
BP	cytoskeleton organization	10496204, 10452709, 10361375, 10385153, 10462796, 10483401, 10421877, 10474381, 10382998, 10359890, 10521090, 10477187, 10432511, 10474984	0.000445795
BP	meiosis	10352048, 10451805, 10361375, 10588294, 10346365, 10584710, 10474902, 10568714	0.000471004
BP	M phase of meiotic cell cycle	10352048, 10451805, 10361375, 10588294, 10346365, 10584710, 10474902, 10568714	0.000471004
BP	meiotic cell cycle	10352048, 10451805, 10361375, 10588294, 10346365, 10584710, 10474902, 10568714	0.000553246
MF	kinetochore binding	10496204, 10385153, 10411728	0.000730864
BP	regulation of microtubule-based process	10496204, 10521090, 10420426, 10491805, 10360985, 10459755	0.000732212
MF	protein kinase activity	10398173, 10557156, 10474769, 10369815, 10487480, 10416037, 10491805, 10377405, 10592201, 10504470, 10482824, 10556266, 10587508, 10490104, 10528077, 10388234, 10480432	0.000886881
MF	DNA-directed DNA polymerase activity	10605674, 10420877, 10524169, 10435581, 10400649	0.000894624
BP	spindle organization	10452709, 10521090, 10361375, 10483401, 10477187	0.000927601
BP	DNA recombination	10352048, 10588294, 10584710, 10564978, 10474902, 10515257, 10550102	0.000994963
MF	DNA polymerase activity	10605674, 10420877, 10524169, 10435581, 10400649	0.00116873
BP	establishment of organelle localization	10385153, 10474381, 10382998, 10360985, 10474984	0.00146693
MF	tubulin binding	10474381, 10379127, 10382998, 10432511, 10459755, 10474984	0.00209814
BP	DNA integrity checkpoint	10586184, 10508151, 10592201, 10369815, 10584710	0.00248235
MF	helicase activity	10534974, 10437945, 10606071, 10564978, 10462973, 10389395, 10435581, 10515257	0.00263466
BP	metaphase plate congression	10385153, 10474381, 10360985	0.00494872
MF	DNA helicase activity	10534974, 10437945, 10564978, 10389395	0.00536431
MF	microtubule binding	10474381, 10379127, 10382998, 10459755, 10474984	0.00619534
BP	cell proliferation	10534974, 10605674, 10350392, 10521090, 10563780, 10446074, 10462973, 10432511, 10568714, 10399087	0.00644139
BP	maintenance of location in cell	10496204, 10359890, 10350392, 10521090	0.0066347
BP	deoxyribonucleotide biosynthetic process	10394978, 10555695, 10528915	0.00684361
BP	positive regulation of cell cycle	10496204, 10382998, 10360985, 10474984	0.0075785
MF	damaged DNA binding	10420877, 10584710, 10578690, 10474902	0.00761022
BP	mitotic cell cycle checkpoint	10496204, 10594426, 10369815, 10538832	0.00859763
BP	spindle checkpoint	10496204, 10382998, 10538832	0.00901356
BP	regulation of DNA metabolic process	10586184, 10508151, 10546834, 10408321, 10564978	0.00961246
BP	interphase of mitotic cell cycle	10605674, 10592201, 10382998, 10360985, 10528077	0.00961246
BP	interphase	10605674, 10592201, 10382998, 10360985, 10528077	0.0111828
BP	maintenance of location	10496204, 10359890, 10350392, 10521090	0.0134503
BP	negative regulation of DNA replication	10586184, 10508151, 10408321	0.0141358
BP	DNA damage checkpoint	10586184, 10592201, 10369815, 10584710	0.0148619
MF	nucleotidyltransferase activity	10605674, 10367076, 10420877, 10524169, 10435581, 10400649	0.0167746
BP	DNA unwinding during replication	10534974, 10437945, 10474902	0.0170674
BP	recombinational repair	10584710, 10474902, 10515257	0.0170674
BP	double-strand break repair via homologous recombination	10584710, 10474902, 10515257	0.0170674
BP	regulation of microtubule cytoskeleton organization	10496204, 10420426, 10491805, 10459755	0.0195824
BP	DNA duplex unwinding	10534974, 10437945, 10474902	0.0202326
BP	protein amino acid phosphorylation	10398173, 10557156, 10474769, 10369815, 10487480, 10416037, 10491805, 10377405, 10592201, 10504470, 10482824, 10556266, 10587508, 10490104, 10388234, 10480432	0.020849
BP	DNA geometric change	10534974, 10437945, 10474902	0.0236219
BP	regulation of DNA replication	10586184, 10508151, 10408321	0.0310356
BP	double-strand break repair	10605674, 10584710, 10474902, 10515257	0.0357573
BP	establishment of mitotic spindle localization	10385153, 10474984	0.0370169
BP	deoxyribonucleotide metabolic process	10394978, 10555695, 10528915	0.0392366
BP	maintenance of protein location in cell	10496204, 10359890, 10521090	0.0436111
MF	ribonucleoside-diphosphate reductase activity	10394978, 10555695	0.0465351
MF	oxidoreductase activity, acting on CH or CH2 groups	10394978, 10555695	0.0465351
MF	oxidoreductase activity, acting on CH or CH2 groups, disulfide as acceptor	10394978, 10555695	0.0465351
E11.5 ♂+♀ interstitium/stroma enriched
Category	Term	Transcript cluster IDs	p-value
BP	cell surface receptor linked signal transduction	10605256, 10480090, 10519857, 10513256, 10492798, 10464251, 10389797, 10351463, 10459611, 10540333, 10413482, 10529656, 10456046, 10381603, 10506201, 10579812, 10570957, 10356084, 10359929, 10603099, 10405179, 10427402, 10446473, 10573779, 10593293, 10599001, 10538482, 10522503, 10351455	4.47865e-07
MF	calcium ion binding	10569618, 10384044, 10480090, 10503448, 10458731, 10514088, 10581013, 10373223, 10376778, 10458999, 10523376, 10462281, 10398319, 10425945, 10487040, 10521759, 10573779, 10476740, 10563077, 10389929, 10460541, 10410931, 10513208	4.96699e-07
MF	extracellular matrix structural constituent	10536220, 10346015, 10487040, 10446473, 10380419, 10458999	5.42096e-07
BP	appendage development	10586865, 10372145, 10344952, 10472958, 10472962, 10413482, 10493108, 10458999, 10564527, 10395320	2.76547e-06
BP	limb development	10586865, 10372145, 10344952, 10472958, 10472962, 10413482, 10493108, 10458999, 10564527, 10395320	2.76547e-06
BP	forelimb morphogenesis	10586865, 10344952, 10472958, 10472962, 10493108, 10395320	2.9e-06
BP	morphogenesis of an epithelium	10570957, 10586865, 10523376, 10604576, 10372145, 10344952, 10446473, 10519886, 10513739, 10368240, 10413482, 10395320	3.01819e-06
BP	embryonic appendage morphogenesis	10586865, 10372145, 10344952, 10472958, 10472962, 10413482, 10493108, 10458999, 10395320	7.95854e-06
BP	embryonic limb morphogenesis	10586865, 10372145, 10344952, 10472958, 10472962, 10413482, 10493108, 10458999, 10395320	7.95854e-06
BP	epithelium development	10586865, 10604576, 10344952, 10519886, 10368240, 10395320, 10570957, 10523376, 10372145, 10446473, 10513739, 10413482, 10381603	1.94032e-05
BP	limb morphogenesis	10586865, 10372145, 10344952, 10472958, 10472962, 10413482, 10493108, 10458999, 10395320	2.02117e-05
BP	appendage morphogenesis	10586865, 10372145, 10344952, 10472958, 10472962, 10413482, 10493108, 10458999, 10395320	2.02117e-05
BP	tissue morphogenesis	10570957, 10586865, 10523376, 10604576, 10372145, 10344952, 10446473, 10519886, 10513739, 10368240, 10413482, 10395320	3.96686e-05
BP	embryonic forelimb morphogenesis	10586865, 10344952, 10472962, 10493108, 10395320	4.58141e-05
BP	morphogenesis of a branching structure	10570957, 10604576, 10541075, 10344952, 10446473, 10519886, 10368240, 10413482, 10579812	6.31509e-05
MF	platelet-derived growth factor binding	10536220, 10346015, 10380419, 10522503	0.000114764
BP	transmembrane receptor protein tyrosine kinase signaling pathway	10356084, 10605256, 10359929, 10603099, 10427402, 10519857, 10389797, 10506201, 10522503, 10456046	0.000154531
BP	cell adhesion	10452047, 10439895, 10480090, 10514088, 10492021, 10581013, 10376778, 10359929, 10446473, 10593293, 10513739, 10545974, 10540333, 10410931, 10513208	0.000169804
BP	biological adhesion	10452047, 10439895, 10480090, 10514088, 10492021, 10581013, 10376778, 10359929, 10446473, 10593293, 10513739, 10545974, 10540333, 10410931, 10513208	0.000169804
BP	urogenital system development	10570957, 10604576, 10480090, 10344952, 10521759, 10513739, 10368240, 10413482, 10456046	0.000187879
MF	carbohydrate binding	10464251, 10365974, 10543959, 10487040, 10593293, 10514088, 10460541, 10492021, 10485070, 10410931	0.000235731
BP	skeletal system morphogenesis	10372145, 10344952, 10472958, 10380419, 10472970, 10472962, 10522503, 10456046	0.000343137
BP	skeletal system development	10372145, 10543959, 10398319, 10344952, 10472958, 10380419, 10472970, 10472962, 10522503, 10413482, 10456046	0.000420356
BP	gland development	10570957, 10356084, 10446473, 10519886, 10513739, 10472970, 10472962, 10485070, 10413482	0.000495296
MF	polysaccharide binding	10365974, 10543959, 10487040, 10593293, 10492021, 10485070, 10410931	0.000508743
MF	pattern binding	10365974, 10543959, 10487040, 10593293, 10492021, 10485070, 10410931	0.000508743
BP	branching morphogenesis of a tube	10604576, 10541075, 10344952, 10446473, 10368240, 10413482, 10579812	0.000763759
BP	tube morphogenesis	10604576, 10541075, 10372145, 10344952, 10446473, 10368240, 10413482, 10579812, 10395320	0.000882272
BP	embryonic morphogenesis	10586865, 10372145, 10480090, 10344952, 10472958, 10554969, 10472970, 10472962, 10413482, 10493108, 10458999, 10395320	0.000909947
BP	tube development	10586865, 10604576, 10541075, 10372145, 10344952, 10446473, 10368240, 10522503, 10413482, 10579812, 10395320	0.000990123
BP	anterior/posterior pattern formation	10570957, 10586865, 10492798, 10372145, 10472958, 10472970, 10472962, 10564527	0.00100839
BP	embryonic skeletal system development	10372145, 10398319, 10344952, 10472958, 10472970, 10472962	0.00143758
BP	mesenchymal cell development	10586865, 10372145, 10344952, 10519886, 10579812	0.00149746
BP	extracellular matrix organization	10346015, 10480090, 10504424, 10425945, 10492021, 10522503	0.00168897
BP	extracellular structure organization	10346015, 10480090, 10504424, 10425945, 10513739, 10492021, 10522503	0.00171366
BP	G-protein coupled receptor protein signaling pathway	10605256, 10464251, 10405179, 10599001, 10351463, 10538482, 10459611, 10513256, 10529656, 10381603, 10579812, 10351455	0.00176016
BP	mesenchymal cell differentiation	10586865, 10372145, 10344952, 10519886, 10579812	0.00187172
BP	pattern specification process	10570957, 10586865, 10541075, 10492798, 10372145, 10472958, 10472970, 10472962, 10564527, 10579812	0.00207962
BP	mesenchyme development	10586865, 10372145, 10344952, 10519886, 10579812	0.00208116
BP	epithelial tube morphogenesis	10604576, 10372145, 10344952, 10446473, 10368240, 10413482, 10395320	0.00217489
MF	glycosaminoglycan binding	10365974, 10543959, 10593293, 10492021, 10485070, 10410931	0.00225096
BP	respiratory system development	10586865, 10569618, 10344952, 10446473, 10368240, 10522503, 10413482	0.00243795
MF	growth factor activity	10541075, 10603099, 10543959, 10519857, 10565193, 10485070	0.00278278
BP	enzyme linked receptor protein signaling pathway	10356084, 10605256, 10359929, 10603099, 10427402, 10519857, 10389797, 10506201, 10522503, 10456046	0.00286531
MF	actin binding	10605256, 10377319, 10451679, 10512499, 10537184, 10559207, 10536845, 10545974, 10404913, 10578829	0.00309205
BP	embryonic skeletal system morphogenesis	10372145, 10344952, 10472958, 10472970, 10472962	0.00337471
BP	metanephros development	10604576, 10480090, 10344952, 10521759, 10368240	0.00337471
BP	chordate embryonic development	10344952, 10472958, 10472970, 10472962, 10395320, 10579812, 10570957, 10492798, 10372145, 10398319, 10377319, 10522503, 10456046	0.00340222
BP	vasculature development	10586865, 10346015, 10541075, 10603099, 10504424, 10519886, 10380419, 10368240, 10564527, 10579812	0.00350837
BP	embryonic development ending in birth or egg hatching	10344952, 10472958, 10472970, 10472962, 10395320, 10579812, 10570957, 10492798, 10372145, 10398319, 10377319, 10522503, 10456046	0.00366924
BP	neural crest cell differentiation	10586865, 10344952, 10519886, 10579812	0.00431654
BP	neural crest cell development	10586865, 10344952, 10519886, 10579812	0.00431654
BP	regionalization	10570957, 10586865, 10492798, 10372145, 10472958, 10472970, 10472962, 10564527	0.00446441
BP	retinoic acid metabolic process	10586865, 10344952, 10493108	0.00608855
BP	kidney development	10604576, 10480090, 10344952, 10521759, 10368240, 10456046	0.00661279
BP	gland morphogenesis	10570957, 10446473, 10519886, 10513739, 10413482	0.00741138
BP	cellular hormone metabolic process	10586865, 10344952, 10453057, 10493108	0.00775762
BP	lung development	10586865, 10344952, 10446473, 10368240, 10522503, 10413482	0.00814642
BP	axon guidance	10452419, 10439895, 10541075, 10521759, 10377319	0.00848486
BP	respiratory tube development	10586865, 10344952, 10446473, 10368240, 10522503, 10413482	0.00899901
BP	regulation of hormone levels	10356084, 10586865, 10344952, 10453057, 10493108	0.00905782
BP	blood vessel development	10586865, 10346015, 10541075, 10603099, 10504424, 10519886, 10380419, 10564527, 10579812	0.00973098
BP	embryonic organ morphogenesis	10372145, 10480090, 10344952, 10472958, 10472970, 10472962	0.0130267
BP	regulation of cyclic nucleotide biosynthetic process	10605256, 10498952, 10405179, 10579812	0.0135449
BP	regulation of nucleotide biosynthetic process	10605256, 10498952, 10405179, 10579812	0.0135449
BP	muscle tissue development	10472958, 10377319, 10513739, 10472962, 10564527, 10456046	0.0136034
BP	lung morphogenesis	10344952, 10446473, 10368240	0.0137909
BP	secondary metabolic process	10586865, 10344952, 10453057, 10493108	0.0146933
MF	sequence-specific DNA binding	10485117, 10486041, 10372145, 10465916, 10472958, 10451763, 10368240, 10472970, 10472962, 10564527, 10478928	0.0156483
BP	regulation of cyclic nucleotide metabolic process	10605256, 10498952, 10405179, 10579812	0.0158954
BP	diterpenoid metabolic process	10586865, 10344952, 10493108	0.0161373
BP	vitamin A metabolic process	10586865, 10344952, 10493108	0.0161373
BP	terpenoid metabolic process	10586865, 10344952, 10493108	0.0161373
BP	retinoid metabolic process	10586865, 10344952, 10493108	0.0161373
BP	regulation of nucleotide metabolic process	10605256, 10498952, 10405179, 10579812	0.0171512
BP	vascular endothelial growth factor receptor signaling pathway	10603099, 10522503, 10456046	0.018641
BP	face development	10586865, 10380419, 10522503	0.018641
BP	cell proliferation	10541075, 10603099, 10363224, 10377319, 10519857, 10565193, 10451763, 10413482	0.0199357
MF	transmembrane receptor protein tyrosine kinase activity	10359929, 10506201, 10522503, 10456046	0.0210579
BP	hormone metabolic process	10586865, 10344952, 10453057, 10493108	0.0212433
BP	neuron migration	10541075, 10377319, 10564527, 10395320	0.0212433
BP	reproductive developmental process	10570957, 10541075, 10344952, 10513739, 10542575, 10368240, 10522503, 10413482	0.0216108
BP	proximal/distal pattern formation	10586865, 10472958, 10472962	0.0240995
BP	fat-soluble vitamin metabolic process	10586865, 10344952, 10493108	0.0240995
BP	skeletal muscle tissue development	10472958, 10513739, 10472962, 10564527	0.0258241
BP	skeletal muscle organ development	10472958, 10513739, 10472962, 10564527	0.0258241
BP	embryonic organ development	10586865, 10372145, 10480090, 10344952, 10472958, 10472970, 10472962	0.0284677
BP	cell morphogenesis	10452419, 10439895, 10541075, 10446473, 10521759, 10377319, 10519857, 10545974	0.0300059
BP	body morphogenesis	10604576, 10380419, 10522503	0.0301257
BP	regulation of morphogenesis of a branching structure	10570957, 10519857, 10413482	0.0301257
BP	head development	10586865, 10380419, 10522503	0.0301257
MF	intracellular calcium activated chloride channel activity	10569618, 10502552, 10502565	0.0301971
MF	growth factor binding	10536220, 10346015, 10380419, 10522503	0.0306309
BP	muscle organ development	10472958, 10377319, 10513739, 10472962, 10564527, 10456046	0.0309234
MF	cytoskeletal protein binding	10605256, 10377319, 10451679, 10512499, 10537184, 10559207, 10536845, 10545974, 10404913, 10578829	0.0315069
MF	heparin binding	10543959, 10593293, 10492021, 10485070	0.0324144
BP	neuron development	10452419, 10439895, 10541075, 10472958, 10521759, 10377319, 10472962	0.0353327
BP	behavior	10541075, 10543959, 10480090, 10472958, 10521759, 10599001, 10559207, 10472962	0.0361436
BP	cell morphogenesis involved in differentiation	10452419, 10439895, 10541075, 10521759, 10377319, 10545974	0.0373094
MF	peptide binding	10427402, 10599001, 10459611, 10579812	0.0400789
BP	hindlimb morphogenesis	10472958, 10472962, 10395320	0.0401453
BP	striated muscle tissue development	10472958, 10377319, 10513739, 10472962, 10564527	0.0420684
BP	positive regulation of kinase activity	10356084, 10462281, 10601942, 10519857, 10513256	0.0420684
BP	neuron differentiation	10586865, 10452419, 10439895, 10541075, 10472958, 10521759, 10377319, 10472962	0.0430641
BP	peripheral nervous system neuron development	10472958, 10472962	0.0450941
BP	cell motion	10452419, 10439895, 10541075, 10521759, 10377319, 10519886, 10564527, 10395320	0.0458669
BP	positive regulation of transferase activity	10356084, 10462281, 10601942, 10519857, 10513256	0.0467411
BP	axonogenesis	10452419, 10439895, 10541075, 10521759, 10377319	0.0483606
E12.5 ♂+♀ interstitium/stroma enriched
Category	Term	Transcript cluster IDs	p-value
MF	platelet-derived growth factor binding	10536220, 10346015, 10380419, 10522503	1.01234e-05
MF	extracellular matrix structural constituent	10536220, 10346015, 10446473, 10380419	6.21252e-05
MF	calcium ion binding	10519815, 10425945, 10503448, 10521759, 10563077, 10460541, 10389929, 10581013, 10373223, 10513208	0.00238887
MF	growth factor binding	10536220, 10346015, 10380419, 10522503	0.00342288
BP	body morphogenesis	10604576, 10380419, 10522503	0.00630539
MF	glycosaminoglycan binding	10365974, 10543959, 10593293, 10485070	0.00804632
MF	pattern binding	10365974, 10543959, 10593293, 10485070	0.0104102
MF	polysaccharide binding	10365974, 10543959, 10593293, 10485070	0.0104102
MF	carbohydrate binding	10365974, 10543959, 10593293, 10460541, 10485070	0.0139801
BP	morphogenesis of a branching structure	10570957, 10604576, 10446473, 10519886	0.0222106
MF	heparin binding	10543959, 10593293, 10485070	0.0387013
MF	endopeptidase inhibitor activity	10455647, 10356520, 10393559	0.0450308
BP	gland morphogenesis	10570957, 10446473, 10519886	0.0456757
BP	gland development	10570957, 10446473, 10519886, 10485070	0.0471594
BP	biological adhesion	10439895, 10446473, 10593293, 10581013, 10517967, 10513208	0.0489861
BP	cell adhesion	10439895, 10446473, 10593293, 10581013, 10517967, 10513208	0.0489861
E12.5 ♂ interstitium & Leydig cell enriched
Category	Term	Transcript cluster IDs	p-value
BP	cell surface receptor linked signal transduction	10505132, 10505120, 10488060, 10348451, 10561212, 10373179, 10375751, 10519857, 10578045, 10487937, 10532085, 10579812, 10473125, 10603099, 10405179, 10440534, 10357137, 10505143, 10395389, 10396270, 10484307, 10459611, 10579894, 10590031	3.27905e-07
BP	regulation of hormone levels	10574780, 10585794, 10349922, 10561212, 10571054, 10468239	0.000177362
BP	cell-cell signaling	10561212, 10357137, 10373179, 10519857, 10548038, 10513739, 10578045, 10590663	0.00036248
BP	hormone metabolic process	10574780, 10585794, 10349922, 10571054, 10468239	0.000553716
BP	tube development	10357137, 10373179, 10375751, 10482448, 10579894, 10440344, 10368240, 10579812, 10395320	0.000793704
BP	cell motion	10452419, 10473125, 10357137, 10482448, 10548038, 10502081, 10578045, 10440344, 10395320	0.00119019
BP	peripheral nervous system development	10349922, 10472958, 10548038, 10578045	0.00124177
BP	epithelium development	10488060, 10349922, 10423049, 10357137, 10482448, 10513739, 10368240, 10395320	0.0020228
BP	cellular hormone metabolic process	10574780, 10585794, 10571054, 10468239	0.00227658
MF	hormone activity	10416181, 10569129, 10372139, 10403743	0.00251995
BP	glucocorticoid metabolic process	10574780, 10571054, 10468239	0.00258854
BP	aminoglycan metabolic process	10487040, 10600169, 10469151, 10427496	0.00280408
BP	urogenital system development	10349922, 10423049, 10357137, 10513739, 10440344, 10368240	0.00366843
BP	circulatory system process	10574780, 10349922, 10578045, 10372139, 10579812	0.0046581
BP	blood circulation	10574780, 10349922, 10578045, 10372139, 10579812	0.0046581
BP	positive regulation of cell differentiation	10488060, 10357137, 10548038, 10571054, 10578045, 10440344	0.00501791
BP	tissue morphogenesis	10488060, 10357137, 10482448, 10513739, 10368240, 10532085, 10395320	0.00559225
BP	regulation of blood pressure	10574780, 10349922, 10578045, 10579812	0.00563566
BP	morphogenesis of an epithelium	10488060, 10357137, 10482448, 10513739, 10368240, 10395320	0.00791047
BP	embryonic morphogenesis	10473125, 10423654, 10472958, 10357137, 10373179, 10482448, 10501608, 10395320	0.00840152
BP	cell proliferation	10603099, 10357137, 10482448, 10519857, 10502081, 10579894, 10532085	0.00846074
BP	lung development	10357137, 10373179, 10375751, 10579894, 10368240	0.00856184
BP	integrin-mediated signaling pathway	10473125, 10440534, 10375751, 10590031	0.00858132
MF	growth factor binding	10345777, 10561212, 10548038, 10532085	0.00878173
BP	respiratory tube development	10357137, 10373179, 10375751, 10579894, 10368240	0.00930695
BP	pattern specification process	10472958, 10357137, 10373179, 10482448, 10395389, 10579894, 10579812	0.00986184
BP	proximal/distal pattern formation	10472958, 10357137, 10373179	0.0105416
BP	positive regulation of developmental process	10488060, 10357137, 10548038, 10571054, 10578045, 10440344	0.0111328
BP	steroid biosynthetic process	10500565, 10585794, 10571054, 10468239	0.0116123
BP	respiratory system development	10357137, 10373179, 10375751, 10579894, 10368240	0.0117925
BP	regulation of nervous system development	10357137, 10373179, 10548038, 10571054, 10440344	0.0122443
BP	reproductive structure development	10349922, 10423049, 10357137, 10513739, 10368240	0.0127071
BP	chordate embryonic development	10473125, 10423654, 10472958, 10357137, 10482448, 10501608, 10532085, 10579812, 10395320	0.0131132
BP	embryonic development ending in birth or egg hatching	10473125, 10423654, 10472958, 10357137, 10482448, 10501608, 10532085, 10579812, 10395320	0.0138123
BP	neuron fate commitment	10472958, 10357137, 10578045	0.0147381
BP	axon guidance	10452419, 10357137, 10548038, 10440344	0.0151869
BP	steroid metabolic process	10500565, 10574780, 10585794, 10571054, 10468239	0.015189
BP	polysaccharide metabolic process	10487040, 10600169, 10469151, 10427496	0.0159683
BP	embryonic organ development	10473125, 10423654, 10472958, 10357137, 10373179, 10501608	0.016834
BP	cerebellum development	10585794, 10357137, 10373179	0.0178712
BP	neuron differentiation	10452419, 10488060, 10472958, 10357137, 10548038, 10578045, 10440344	0.0178816
BP	regulation of cell development	10357137, 10548038, 10571054, 10440344, 10532085	0.0179582
BP	notochord regression	10357137, 10373179	0.0196382
BP	ventral midline development	10357137, 10373179	0.0196382
MF	steroid binding	10574780, 10585794, 10571054	0.0198231
MF	peptide receptor activity	10459611, 10487937, 10579812	0.0214939
MF	peptide receptor activity, G-protein coupled	10459611, 10487937, 10579812	0.0214939
MF	growth factor activity	10603099, 10519857, 10548038, 10403743	0.0226935
BP	metencephalon development	10585794, 10357137, 10373179	0.0230459
BP	smoothened signaling pathway	10357137, 10373179, 10579894	0.0230459
BP	prostate gland development	10423049, 10357137, 10513739	0.024892
BP	glycosaminoglycan metabolic process	10600169, 10469151, 10427496	0.024892
MF	polysaccharide binding	10487040, 10600169, 10427496, 10532085	0.0255743
MF	pattern binding	10487040, 10600169, 10427496, 10532085	0.0255743
BP	heart development	10473125, 10357137, 10578045, 10501608, 10532085, 10579812	0.0270758
BP	cell adhesion	10591125, 10591123, 10591114, 10591120, 10591090, 10591116, 10591129, 10376778, 10591118, 10591127, 10368409, 10473125, 10591135, 10591131, 10513739, 10440344, 10501608, 10590031	0.0274891
BP	biological adhesion	10591125, 10591123, 10591114, 10591120, 10591090, 10591116, 10591129, 10376778, 10591118, 10591127, 10368409, 10473125, 10591135, 10591131, 10513739, 10440344, 10501608, 10590031	0.0274891
BP	smoothened signaling pathway involved in regulation of granule cell precursor cell proliferation	10357137, 10373179	0.0293141
BP	anatomical structure regression	10357137, 10373179	0.0293141
BP	positive regulation of neurogenesis	10548038, 10571054, 10440344	0.0307755
MF	fibronectin binding	10473125, 10513739	0.0375017
MF	steroid hydroxylase activity	10585794, 10468239	0.0375017
BP	Purkinje cell-granule cell precursor cell signaling involved in regulation of granule cell precursor cell proliferation	10357137, 10373179	0.0388957
BP	peptide cross-linking via chondroitin 4-sulfate glycosaminoglycan	10600169, 10427496	0.0388957
BP	mesenchymal-epithelial cell signaling	10519857, 10513739	0.0388957
MF	cytokine binding	10345777, 10423049, 10532085	0.0389336
BP	tube morphogenesis	10357137, 10482448, 10368240, 10579812, 10395320	0.04102
BP	kidney development	10349922, 10357137, 10440344, 10368240	0.0414497
BP	positive regulation of cell development	10548038, 10571054, 10440344	0.0416563
BP	cell morphogenesis	10452419, 10357137, 10519857, 10548038, 10578045, 10440344	0.0437733
BP	regionalization	10472958, 10357137, 10373179, 10482448, 10579894	0.0439561
BP	cell fate commitment	10472958, 10357137, 10548038, 10578045	0.0441501
BP	regulation of neurogenesis	10357137, 10548038, 10571054, 10440344	0.0469366
BP	vasculature development	10473125, 10603099, 10502081, 10368240, 10532085, 10579812	0.0478892
BP	notochord morphogenesis	10357137, 10373179	0.0483841
BP	regulation of granule cell precursor proliferation	10357137, 10373179	0.0483841
BP	positive regulation of granule cell precursor proliferation	10357137, 10373179	0.0483841
BP	chorio-allantoic fusion	10473125, 10501608	0.0483841
BP	dorsal/ventral pattern formation	10357137, 10373179, 10579894	0.0487767
BP	extracellular structure organization	10375751, 10513739, 10578045, 10427496	0.0498083
E12.5 ♀ stroma enriched
Category	Term	Transcript cluster IDs	p-value
BP	embryonic limb morphogenesis	10359624, 10427280, 10493108	0.0066955
BP	embryonic appendage morphogenesis	10359624, 10427280, 10493108	0.0066955
BP	appendage morphogenesis	10359624, 10427280, 10493108	0.00851916
BP	limb morphogenesis	10359624, 10427280, 10493108	0.00851916
BP	appendage development	10359624, 10427280, 10493108	0.00895162
BP	limb development	10359624, 10427280, 10493108	0.00895162
BP	cell surface receptor linked signal transduction	10464251, 10446928, 10573779, 10351463, 10492689	0.022907
MF	calcium ion binding	10427862, 10446928, 10573779, 10476740	0.0380461
BP	skeletal system development	10359624, 10427280, 10355500	0.04253
E13.5 ♂+♀ interstitium/stroma enriched
Category	Term	Transcript cluster IDs	p-value
BP	collagen catabolic process	10573924, 10503448, 10375751	0.000271232
BP	multicellular organismal catabolic process	10573924, 10503448, 10375751	0.000271232
BP	collagen metabolic process	10573924, 10503448, 10375751	0.000804893
MF	heparin binding	10593293, 10358339, 10492021, 10485070	0.000907968
BP	multicellular organismal macromolecule metabolic process	10573924, 10503448, 10375751	0.000981088
BP	multicellular organismal metabolic process	10573924, 10503448, 10375751	0.00138382
MF	glycosaminoglycan binding	10593293, 10358339, 10492021, 10485070	0.00206274
MF	carbohydrate binding	10593293, 10514088, 10358339, 10492021, 10485070	0.00251046
MF	pattern binding	10593293, 10358339, 10492021, 10485070	0.00269922
MF	polysaccharide binding	10593293, 10358339, 10492021, 10485070	0.00269922
BP	ossification	10573924, 10380419, 10498383, 10355500	0.00271175
BP	bone development	10573924, 10380419, 10498383, 10355500	0.0040704
BP	skeletal system development	10427293, 10573924, 10380419, 10498383, 10355500	0.00742081
BP	bone trabecula formation	10573924, 10380419	0.00866479
BP	intramembranous ossification	10573924, 10380419	0.0172568
MF	metalloendopeptidase activity	10573924, 10503448, 10375751	0.023722
BP	trabecula formation	10573924, 10380419	0.0384219
BP	face morphogenesis	10573924, 10380419	0.0467637
E13.5 ♂ interstitium & Leydig cell enriched
Category	Term	Transcript cluster IDs	p-value
BP	cell surface receptor linked signal transduction	10403229, 10488060, 10373179, 10561212, 10519857, 10487937, 10560919, 10461856, 10476886, 10453487, 10357137, 10395389, 10459611, 10579894, 10540333, 10413482, 10456046, 10496192, 10410039, 10538247, 10578045, 10366707, 10532085, 10473125, 10603099, 10405179, 10346882, 10440534, 10396270, 10522503, 10590031	1.80164e-07
MF	calcium ion binding	10591125, 10488060, 10399407, 10561212, 10591120, 10441902, 10581013, 10591127, 10431051, 10569714, 10519815, 10437629, 10591135, 10488378, 10425945, 10591131, 10502081, 10460541, 10513208, 10591112, 10591114, 10533145, 10591110, 10453233, 10591090, 10591092, 10591116, 10591094, 10376778, 10473125, 10586118, 10436456, 10489759, 10375175, 10487040, 10494804	8.90717e-07
BP	steroid biosynthetic process	10500565, 10499483, 10585794, 10578916, 10533929, 10571054, 10468239, 10527920, 10359917	1.40731e-06
BP	cell proliferation	10410039, 10541075, 10467319, 10482448, 10519857, 10401607, 10532085, 10399908, 10603099, 10357137, 10563780, 10533929, 10502081, 10579894, 10413482	2.51456e-06
BP	regulation of hormone levels	10574780, 10585794, 10349922, 10467319, 10561212, 10533929, 10571054, 10468239	3.64608e-05
BP	steroid metabolic process	10500565, 10499483, 10574780, 10585794, 10578916, 10533929, 10571054, 10468239, 10527920, 10359917	4.296e-05
BP	hormone metabolic process	10574780, 10585794, 10349922, 10467319, 10533929, 10571054, 10468239	4.98863e-05
BP	cell adhesion	10591125, 10403229, 10591120, 10581013, 10374083, 10517967, 10591127, 10368409, 10591135, 10591131, 10440344, 10540333, 10513208, 10591112, 10591114, 10568668, 10591110, 10591090, 10591092, 10591094, 10591116, 10376778, 10473125, 10346882, 10533929, 10370210, 10501608, 10590031	5.56376e-05
BP	biological adhesion	10591125, 10403229, 10591120, 10581013, 10374083, 10517967, 10591127, 10368409, 10591135, 10591131, 10440344, 10540333, 10513208, 10591112, 10591114, 10568668, 10591110, 10591090, 10591092, 10591094, 10591116, 10376778, 10473125, 10346882, 10533929, 10370210, 10501608, 10590031	5.56376e-05
BP	cell motion	10452419, 10410766, 10541075, 10482448, 10519886, 10578045, 10560919, 10564527, 10473125, 10375175, 10357137, 10533929, 10502081, 10440344	8.52458e-05
BP	cellular hormone metabolic process	10574780, 10585794, 10467319, 10533929, 10571054, 10468239	8.69381e-05
MF	neuropeptide binding	10496192, 10476886, 10459611, 10487937	0.000113306
MF	neuropeptide receptor activity	10496192, 10476886, 10459611, 10487937	0.000113306
MF	peptide binding	10496192, 10476886, 10425287, 10459611, 10487937, 10376201, 10366707	0.00026764
BP	urogenital system development	10604576, 10349922, 10467319, 10423049, 10357137, 10401607, 10440344, 10423030, 10413482, 10456046	0.000454065
BP	tube development	10604576, 10541075, 10410039, 10467319, 10357137, 10373179, 10482448, 10401607, 10579894, 10440344, 10522503, 10413482	0.000741541
MF	peptide receptor activity, G-protein coupled	10496192, 10476886, 10459611, 10487937, 10366707	0.0008404
MF	peptide receptor activity	10496192, 10476886, 10459611, 10487937, 10366707	0.0008404
MF	neurotransmitter receptor activity	10496192, 10476886, 10459611, 10487937	0.00115021
MF	neurotransmitter binding	10496192, 10476886, 10459611, 10487937	0.00115021
BP	lipid biosynthetic process	10500565, 10499483, 10585794, 10395394, 10578916, 10533929, 10571054, 10468239, 10461439, 10527920, 10359917	0.0018775
BP	localization of cell	10541075, 10473125, 10410766, 10533929, 10482448, 10519886, 10502081, 10578045, 10564527, 10560919	0.00214001
BP	cell motility	10541075, 10473125, 10410766, 10533929, 10482448, 10519886, 10502081, 10578045, 10564527, 10560919	0.00214001
BP	sterol metabolic process	10499483, 10585794, 10578916, 10533929, 10527920, 10359917	0.00215435
MF	gated channel activity	10569714, 10472155, 10519815, 10437629, 10502552, 10533145, 10502565, 10495083, 10590663	0.00235045
BP	regulation of smoothened signaling pathway	10604576, 10410039, 10357137, 10579894	0.0024295
BP	cell-cell signaling	10437629, 10561212, 10357137, 10373179, 10519857, 10578045, 10590663, 10397575, 10413482	0.00244799
BP	behavior	10585794, 10437629, 10541075, 10538247, 10399908, 10349922, 10472958, 10578045, 10440344, 10366707, 10560919	0.00281933
BP	extracellular structure organization	10346015, 10425945, 10441902, 10578045, 10397575, 10427496, 10522503	0.00328765
BP	regulation of blood pressure	10574780, 10538247, 10349922, 10578045, 10366707	0.00368207
BP	calcium ion transport	10569714, 10519815, 10357833, 10437629, 10533145, 10453233	0.00429095
BP	epithelium development	10604576, 10410039, 10488060, 10349922, 10423049, 10357137, 10482448, 10519886, 10401607, 10423030, 10413482	0.00430215
BP	cell migration	10541075, 10473125, 10410766, 10533929, 10482448, 10519886, 10502081, 10578045, 10564527	0.00503434
BP	regulation of systemic arterial blood pressure by hormone	10574780, 10349922, 10366707	0.00593663
BP	hormone biosynthetic process	10585794, 10533929, 10468239	0.00593663
MF	growth factor activity	10541075, 10603099, 10405063, 10519857, 10401607, 10403743	0.00598564
BP	morphogenesis of an epithelium	10604576, 10410039, 10488060, 10357137, 10482448, 10519886, 10401607, 10413482	0.00619545
BP	integrin-mediated signaling pathway	10403229, 10473125, 10346882, 10440534, 10590031	0.00635135
MF	platelet-derived growth factor binding	10346015, 10370210, 10522503	0.00650426
BP	circulatory system process	10574780, 10495794, 10538247, 10349922, 10578045, 10366707	0.00676854
BP	blood circulation	10574780, 10495794, 10538247, 10349922, 10578045, 10366707	0.00676854
MF	polysaccharide binding	10410039, 10487040, 10441902, 10600169, 10427496, 10532085	0.0072611
MF	pattern binding	10410039, 10487040, 10441902, 10600169, 10427496, 10532085	0.0072611
MF	ion channel activity	10569714, 10472155, 10519815, 10437629, 10502552, 10533145, 10502565, 10495083, 10590663	0.0072932
BP	glucocorticoid metabolic process	10574780, 10571054, 10468239	0.00782584
BP	tissue morphogenesis	10604576, 10410039, 10488060, 10357137, 10482448, 10519886, 10401607, 10532085, 10413482	0.00785846
BP	smoothened signaling pathway	10410039, 10357137, 10373179, 10579894	0.00793577
MF	steroid binding	10574780, 10585794, 10410039, 10571054	0.00800018
MF	substrate specific channel activity	10569714, 10472155, 10519815, 10437629, 10502552, 10533145, 10502565, 10495083, 10590663	0.00827881
MF	cholesterol binding	10585794, 10410039, 10571054	0.00856939
MF	sterol binding	10585794, 10410039, 10571054	0.00856939
BP	cholesterol metabolic process	10499483, 10585794, 10533929, 10527920, 10359917	0.00870425
MF	growth factor binding	10346015, 10561212, 10370210, 10532085, 10522503	0.00877995
BP	sterol biosynthetic process	10499483, 10578916, 10527920, 10359917	0.00890498
MF	passive transmembrane transporter activity	10569714, 10472155, 10519815, 10437629, 10502552, 10533145, 10502565, 10495083, 10590663	0.00898836
MF	channel activity	10569714, 10472155, 10519815, 10437629, 10502552, 10533145, 10502565, 10495083, 10590663	0.00898836
BP	endocrine process	10574780, 10349922, 10366707	0.00994797
BP	kidney development	10604576, 10349922, 10357137, 10401607, 10440344, 10456046	0.0112391
MF	heme binding	10585794, 10498935, 10468239, 10461439, 10527920	0.0126594
BP	axon guidance	10452419, 10541075, 10375175, 10357137, 10440344	0.0131973
BP	aminoglycan metabolic process	10487040, 10600169, 10469151, 10427496	0.0134532
BP	lung development	10467319, 10357137, 10373179, 10579894, 10522503, 10413482	0.0137532
BP	respiratory tube development	10467319, 10357137, 10373179, 10579894, 10522503, 10413482	0.015142
MF	hormone activity	10538247, 10416181, 10569129, 10403743	0.0152505
MF	calcium channel activity	10569714, 10519815, 10437629, 10533145	0.0152505
BP	pattern specification process	10541075, 10410039, 10472958, 10357137, 10373179, 10482448, 10395389, 10579894, 10564527	0.0154675
BP	di-, tri-valent inorganic cation transport	10569714, 10519815, 10357833, 10437629, 10533145, 10453233	0.0158704
BP	extracellular matrix organization	10346015, 10425945, 10441902, 10427496, 10522503	0.0168858
BP	regulation of systemic arterial blood pressure mediated by a chemical signal	10574780, 10349922, 10366707	0.0176276
BP	epithelial tube morphogenesis	10604576, 10410039, 10357137, 10482448, 10401607, 10413482	0.018195
MF	tetrapyrrole binding	10585794, 10498935, 10468239, 10461439, 10527920	0.0185785
MF	cation channel activity	10569714, 10472155, 10519815, 10437629, 10533145, 10495083	0.0190512
MF	metal ion transmembrane transporter activity	10569714, 10472155, 10519815, 10357833, 10437629, 10533145, 10495083	0.0196164
BP	morphogenesis of a branching structure	10604576, 10541075, 10357137, 10519886, 10401607, 10413482	0.0198636
BP	respiratory system development	10467319, 10357137, 10373179, 10579894, 10522503, 10413482	0.0198636
BP	blood vessel development	10346015, 10541075, 10473125, 10603099, 10519886, 10502081, 10401607, 10532085, 10564527	0.0199908
BP	pituitary gland development	10357137, 10373179, 10413482	0.0205983
BP	embryonic morphogenesis	10410039, 10473125, 10423654, 10467319, 10472958, 10357137, 10373179, 10482448, 10501608, 10413482	0.0214041
MF	steroid dehydrogenase activity, acting on the CH-OH group of donors, NAD or NADP as acceptor	10500565, 10574780, 10359917	0.022494
BP	muscle tissue development	10467319, 10472958, 10578045, 10532085, 10564527, 10456046	0.0225501
BP	vasculature development	10346015, 10541075, 10473125, 10603099, 10519886, 10502081, 10401607, 10532085, 10564527	0.0234881
BP	vascular endothelial growth factor receptor signaling pathway	10603099, 10522503, 10456046	0.0237614
BP	dorsal/ventral pattern formation	10410039, 10357137, 10373179, 10579894	0.0240825
MF	glycosaminoglycan binding	10410039, 10441902, 10600169, 10427496, 10532085	0.024635
BP	metal ion transport	10569714, 10472155, 10519815, 10357833, 10437629, 10533145, 10453233, 10495083, 10560919	0.0260469
BP	tube morphogenesis	10604576, 10541075, 10410039, 10357137, 10482448, 10401607, 10413482	0.0270819
BP	regulation of systemic arterial blood pressure	10574780, 10349922, 10366707	0.0271094
BP	forebrain development	10410766, 10357137, 10373179, 10482448, 10413482, 10564527	0.0275323
MF	steroid dehydrogenase activity	10500565, 10574780, 10359917	0.0295724
BP	development of primary male sexual characteristics	10349922, 10467319, 10522503, 10413482	0.0296936
BP	regionalization	10410039, 10472958, 10357137, 10373179, 10482448, 10579894, 10564527	0.0298067
BP	heart development	10410039, 10473125, 10467319, 10357137, 10519886, 10578045, 10501608, 10532085	0.0298849
BP	diencephalon development	10357137, 10373179, 10413482	0.0306351
BP	proximal/distal pattern formation	10472958, 10357137, 10373179	0.0306351
BP	ventral midline development	10357137, 10373179	0.0344329
BP	urinary bladder development	10467319, 10413482	0.0344329
BP	notochord regression	10357137, 10373179	0.0344329
BP	G-protein coupled receptor protein signaling pathway	10461856, 10496192, 10538247, 10476886, 10453487, 10405179, 10459611, 10487937, 10366707	0.0356999
BP	male sex differentiation	10349922, 10467319, 10522503, 10413482	0.0359345
BP	branching morphogenesis of a tube	10604576, 10541075, 10357137, 10401607, 10413482	0.036109
MF	metallopeptidase activity	10568668, 10346882, 10440534, 10502081, 10374083, 10603066	0.0366372
BP	mammary gland duct morphogenesis	10410039, 10357137, 10413482	0.0381914
BP	regulation of morphogenesis of a branching structure	10519857, 10401607, 10413482	0.0381914
MF	carbohydrate binding	10410039, 10487040, 10441902, 10600169, 10460541, 10427496, 10532085	0.0397141
BP	negative regulation of epithelial cell proliferation	10410039, 10532085, 10413482	0.0422084
BP	neuron fate commitment	10472958, 10357137, 10578045	0.0422084
BP	response to hydrogen peroxide	10585794, 10571054, 10376201	0.0463758
BP	cholesterol biosynthetic process	10499483, 10527920, 10359917	0.0463758
BP	regulation of phosphorylation	10399908, 10399470, 10551736, 10601942, 10482448, 10519857, 10578045, 10456046	0.0471507
MF	voltage-gated ion channel activity	10569714, 10472155, 10519815, 10533145, 10495083	0.0473436
MF	voltage-gated channel activity	10569714, 10472155, 10519815, 10533145, 10495083	0.0473436
BP	appendage development	10410039, 10472958, 10357137, 10413482, 10564527	0.04813
BP	limb development	10410039, 10472958, 10357137, 10413482, 10564527	0.04813
BP	embryonic organ development	10473125, 10423654, 10467319, 10472958, 10357137, 10373179, 10501608	0.0486379
BP	muscle organ development	10467319, 10472958, 10578045, 10532085, 10564527, 10456046	0.0494543
BP	ion transport	10569714, 10472155, 10519815, 10357833, 10437629, 10502552, 10533145, 10453233, 10502565, 10495083, 10590663, 10560919	0.0495186
E11.5 ♂+♀ germ cell enriched
Category	Term	Transcript cluster IDs	p-value
BP	DNA metabolic process	10574996, 10459655, 10397719, 10508151, 10391461, 10546163, 10506118, 10562818, 10425632, 10593060, 10355711, 10524169, 10508759, 10582501, 10396030, 10388409, 10352048, 10387492, 10528340, 10367076, 10347232, 10410947, 10578557, 10454564, 10474902, 10543471, 10528077, 10583264, 10540738, 10500445, 10447417, 10395049, 10367122, 10550102, 10408762, 10359801, 10543114, 10470665, 10531776, 10593526,…	1.38397e-17
BP	M phase	10352767, 10525591, 10593060, 10582501, 10538832, 10459755, 10388409, 10568968, 10352048, 10386909, 10591781, 10474902, 10583264, 10361651, 10427166, 10365627, 10540738, 10474769, 10577492, 10565089, 10383853, 10462632, 10359801, 10515744, 10585129, 10479765, 10344939, 10421029, 10419323, 10586907, 10524105, 10365578, 10419465, 10573451, 10381072, 10360985, 10459844, 10490304, 10516246, 10400589,…	5.00332e-14
BP	cell cycle	10352767, 10391461, 10593060, 10538832, 10388409, 10472058, 10352048, 10386909, 10577508, 10591781, 10474902, 10583264, 10528077, 10427166, 10540738, 10474769, 10445909, 10550102, 10565089, 10359801, 10515744, 10583472, 10593526, 10467739, 10365578, 10573451, 10381072, 10490304, 10400589, 10385842, 10592201, 10594426, 10600814, 10509820, 10583952, 10494281, 10389627, 10592790, 10361375, 10517060,…	1.47646e-13
BP	cell cycle phase	10352767, 10525591, 10593060, 10538832, 10582501, 10459755, 10388409, 10568968, 10352048, 10528340, 10386909, 10591781, 10474902, 10528077, 10583264, 10361651, 10427166, 10365627, 10540738, 10474769, 10577492, 10565089, 10383853, 10462632, 10359801, 10515744, 10585129, 10368199, 10479765, 10344939, 10421029, 10419323, 10586907, 10524105, 10365578, 10419465, 10573451, 10381072, 10360985, 10459844,…	1.87579e-13
BP	ribonucleoprotein complex biogenesis	10574996, 10375880, 10492598, 10524659, 10419759, 10454984, 10502146, 10378508, 10451580, 10548859, 10384123, 10551173, 10433672, 10444595, 10484457, 10421981, 10389842, 10407543, 10500582, 10395893, 10600485, 10564313, 10531383, 10476093, 10447521, 10529425, 10436428, 10539574, 10541845, 10389269, 10590549, 10420035, 10547251, 10463751, 10507557, 10423842, 10355037, 10588522, 10443836, 10392098	2.57902e-13
BP	cell cycle process	10352767, 10391461, 10525591, 10593060, 10538832, 10582501, 10459755, 10388409, 10568968, 10352048, 10528340, 10386909, 10591781, 10474902, 10528077, 10583264, 10361651, 10427166, 10365627, 10540738, 10474769, 10577492, 10565089, 10383853, 10462632, 10359801, 10594053, 10515744, 10585129, 10368199, 10565570, 10479765, 10344939, 10421029, 10419323, 10586907, 10524105, 10365578, 10419465, 10573451,…	1.02035e-12
BP	ribosome biogenesis	10375880, 10492598, 10524659, 10454984, 10502146, 10378508, 10451580, 10548859, 10384123, 10551173, 10433672, 10421981, 10389842, 10407543, 10500582, 10600485, 10564313, 10531383, 10476093, 10447521, 10529425, 10436428, 10539574, 10541845, 10389269, 10590549, 10420035, 10547251, 10463751, 10507557, 10423842, 10355037, 10588522, 10443836, 10392098	1.16782e-12
MF	helicase activity	10534974, 10532072, 10491014, 10573217, 10421661, 10579219, 10425632, 10581737, 10412155, 10396030, 10384123, 10388018, 10347232, 10426118, 10454564, 10564978, 10462973, 10357292, 10500960, 10500630, 10372766, 10470628, 10500445, 10369630, 10462752, 10549057, 10512067, 10382152, 10352558, 10470665, 10478825, 10412177, 10389395, 10568651, 10515257, 10533961, 10363575, 10593508	2.07365e-12
BP	DNA repair	10459655, 10397719, 10508151, 10391461, 10506118, 10593060, 10425632, 10562818, 10355711, 10524169, 10582501, 10388409, 10396030, 10352048, 10347232, 10410947, 10454564, 10474902, 10583264, 10540738, 10500445, 10447417, 10550102, 10408762, 10531776, 10470665, 10593526, 10441815, 10389395, 10515257, 10354542, 10587892, 10352242, 10419460, 10526972, 10385842, 10592201, 10564978, 10355329, 10592790,…	4.10337e-12
BP	ncRNA metabolic process	10517159, 10423629, 10479749, 10359386, 10484457, 10421981, 10500582, 10376959, 10529425, 10447521, 10539574, 10590549, 10359801, 10355037, 10368511, 10511207, 10408666, 10439985, 10392098, 10375880, 10524659, 10454984, 10352735, 10502146, 10573401, 10384123, 10548859, 10551173, 10405971, 10355931, 10389842, 10488748, 10540391, 10600485, 10564313, 10395807, 10487969, 10541845, 10500218, 10463751,…	9.00869e-12
BP	ncRNA processing	10517159, 10375880, 10423629, 10524659, 10479749, 10454984, 10352735, 10502146, 10573401, 10438313, 10548859, 10384123, 10551173, 10405971, 10484457, 10421981, 10389842, 10500582, 10376959, 10488748, 10540391, 10600485, 10564313, 10447521, 10529425, 10395807, 10487969, 10539574, 10541845, 10590549, 10463751, 10507557, 10583634, 10423842, 10355037, 10588522, 10368511, 10443836, 10511207, 10408666,…	9.91394e-12
BP	response to DNA damage stimulus	10459655, 10397719, 10508151, 10391461, 10506118, 10593060, 10425632, 10562818, 10355711, 10524169, 10582501, 10396030, 10472058, 10388409, 10524266, 10352048, 10347232, 10410947, 10454564, 10474902, 10583264, 10563303, 10540738, 10500445, 10447417, 10550102, 10408762, 10594053, 10531776, 10470665, 10593526, 10441815, 10389395, 10515257, 10354542, 10587892, 10352242, 10419460, 10526972, 10451860,…	7.12608e-11
BP	meiosis	10352767, 10586907, 10419465, 10573451, 10582501, 10490304, 10388409, 10568968, 10352048, 10385842, 10449687, 10346365, 10474902, 10583264, 10427166, 10389627, 10365627, 10431182, 10361375, 10540738, 10430555, 10421325, 10565089, 10359801, 10527801, 10526797, 10479765	4.35566e-10
BP	M phase of meiotic cell cycle	10352767, 10586907, 10419465, 10573451, 10582501, 10490304, 10388409, 10568968, 10352048, 10385842, 10449687, 10346365, 10474902, 10583264, 10427166, 10389627, 10365627, 10431182, 10361375, 10540738, 10430555, 10421325, 10565089, 10359801, 10527801, 10526797, 10479765	4.35566e-10
BP	meiotic cell cycle	10352767, 10586907, 10419465, 10573451, 10582501, 10490304, 10388409, 10568968, 10352048, 10385842, 10449687, 10346365, 10474902, 10583264, 10427166, 10389627, 10365627, 10431182, 10361375, 10540738, 10430555, 10421325, 10565089, 10359801, 10527801, 10526797, 10479765	8.41591e-10
MF	purine NTP-dependent helicase activity	10532072, 10421661, 10573217, 10579219, 10425632, 10581737, 10412155, 10396030, 10384123, 10347232, 10388018, 10454564, 10564978, 10357292, 10500630, 10500960, 10372766, 10470628, 10369630, 10549057, 10512067, 10478825, 10352558, 10412177, 10389395, 10363575, 10593508	3.51765e-09
MF	ATP-dependent helicase activity	10532072, 10421661, 10573217, 10579219, 10425632, 10581737, 10412155, 10396030, 10384123, 10347232, 10388018, 10454564, 10564978, 10357292, 10500630, 10500960, 10372766, 10470628, 10369630, 10549057, 10512067, 10478825, 10352558, 10412177, 10389395, 10363575, 10593508	3.51765e-09
MF	ATP binding	10520304, 10352767, 10507347, 10581737, 10553788, 10396030, 10380025, 10347232, 10388018, 10484457, 10504470, 10454564, 10402630, 10526069, 10474902, 10363894, 10500630, 10474769, 10470628, 10500445, 10437311, 10461909, 10550102, 10555118, 10357590, 10382152, 10593526, 10587508, 10518686, 10350823, 10491486, 10491014, 10587892, 10579219, 10354588, 10381072, 10469613, 10592201, 10396610, 10385842,…	3.71364e-09
MF	ATPase activity	10406482, 10532072, 10491486, 10491014, 10573217, 10421661, 10579219, 10425632, 10581737, 10423805, 10412155, 10553788, 10422280, 10396030, 10384123, 10347232, 10388018, 10580300, 10454564, 10564978, 10474902, 10357292, 10503723, 10500960, 10389627, 10452118, 10500630, 10372766, 10470628, 10500445, 10438690, 10369630, 10430555, 10428763, 10447395, 10549057, 10344637, 10512067, 10443598, 10352558,…	5.88974e-09
MF	nucleoside binding	10520304, 10352767, 10507347, 10581737, 10553788, 10396030, 10380025, 10347232, 10388018, 10484457, 10504470, 10454564, 10402630, 10526069, 10474902, 10363894, 10500630, 10474769, 10470628, 10500445, 10437311, 10461909, 10550102, 10555118, 10357590, 10382152, 10593526, 10365355, 10587508, 10518686, 10350823, 10491486, 10491014, 10587892, 10579219, 10354588, 10381072, 10469613, 10592201, 10396610,…	6.19959e-09
MF	adenyl ribonucleotide binding	10520304, 10352767, 10507347, 10581737, 10553788, 10396030, 10380025, 10347232, 10388018, 10484457, 10504470, 10454564, 10402630, 10526069, 10474902, 10363894, 10500630, 10474769, 10470628, 10500445, 10437311, 10461909, 10550102, 10555118, 10357590, 10382152, 10593526, 10587508, 10518686, 10350823, 10491486, 10491014, 10587892, 10579219, 10354588, 10381072, 10469613, 10592201, 10396610, 10385842,…	6.33864e-09
BP	RNA processing	10574996, 10517159, 10423629, 10573217, 10479749, 10374793, 10492757, 10438313, 10494910, 10484457, 10579703, 10421981, 10494452, 10500582, 10395893, 10391768, 10376959, 10447521, 10529425, 10500630, 10500960, 10539574, 10590549, 10347774, 10553993, 10565089, 10355037, 10500253, 10368511, 10516974, 10504703, 10511207, 10408666, 10439985, 10392098, 10375880, 10524659, 10419759, 10454984, 10478967,…	7.28801e-09
BP	rRNA processing	10375880, 10529425, 10447521, 10524659, 10541845, 10539574, 10454984, 10590549, 10463751, 10502146, 10507557, 10384123, 10548859, 10423842, 10551173, 10355037, 10588522, 10389842, 10421981, 10443836, 10500582, 10392098, 10600485, 10564313	1.06389e-08
BP	rRNA metabolic process	10375880, 10529425, 10447521, 10524659, 10541845, 10539574, 10454984, 10590549, 10463751, 10502146, 10507557, 10384123, 10548859, 10423842, 10551173, 10355037, 10588522, 10389842, 10421981, 10443836, 10500582, 10392098, 10600485, 10564313	1.45422e-08
MF	ATPase activity, coupled	10406482, 10532072, 10491486, 10573217, 10421661, 10579219, 10425632, 10581737, 10423805, 10412155, 10553788, 10422280, 10396030, 10384123, 10347232, 10388018, 10580300, 10454564, 10564978, 10474902, 10357292, 10500960, 10389627, 10452118, 10500630, 10372766, 10470628, 10438690, 10369630, 10430555, 10549057, 10344637, 10512067, 10352558, 10478825, 10530319, 10412177, 10389395, 10363575, 10593508	1.60213e-08
MF	adenyl nucleotide binding	10520304, 10352767, 10507347, 10581737, 10553788, 10396030, 10380025, 10347232, 10388018, 10484457, 10504470, 10454564, 10402630, 10526069, 10474902, 10363894, 10500630, 10474769, 10470628, 10500445, 10437311, 10461909, 10550102, 10555118, 10357590, 10382152, 10593526, 10587508, 10518686, 10350823, 10491486, 10491014, 10587892, 10579219, 10354588, 10381072, 10469613, 10592201, 10396610, 10385842,…	1.68413e-08
MF	purine nucleoside binding	10520304, 10352767, 10507347, 10581737, 10553788, 10396030, 10380025, 10347232, 10388018, 10484457, 10504470, 10454564, 10402630, 10526069, 10474902, 10363894, 10500630, 10474769, 10470628, 10500445, 10437311, 10461909, 10550102, 10555118, 10357590, 10382152, 10593526, 10587508, 10518686, 10350823, 10491486, 10491014, 10587892, 10579219, 10354588, 10381072, 10469613, 10592201, 10396610, 10385842,…	2.80273e-08
BP	DNA replication	10459655, 10344939, 10534974, 10391461, 10348879, 10546163, 10562818, 10508759, 10524169, 10381072, 10388409, 10353420, 10528340, 10367076, 10578557, 10564978, 10433910, 10474902, 10543471, 10528077, 10372766, 10479811, 10438690, 10395049, 10572906, 10550102, 10448975, 10543114, 10527801, 10390153, 10562563, 10354085, 10363575, 10353032	5.25713e-08
BP	cellular response to stress	10459655, 10397719, 10508151, 10391461, 10506118, 10562818, 10593060, 10425632, 10355711, 10524169, 10362922, 10582501, 10396030, 10472058, 10388409, 10524266, 10352048, 10347232, 10410947, 10369738, 10454564, 10474902, 10583264, 10563303, 10540738, 10500445, 10447417, 10550102, 10408762, 10594053, 10531776, 10470665, 10593526, 10441815, 10389395, 10419198, 10515257, 10354542, 10587892, 10588899,…	5.63325e-08
MF	purine ribonucleotide binding	10520304, 10352767, 10507347, 10581737, 10553788, 10396030, 10461856, 10380025, 10347232, 10388018, 10484457, 10504470, 10454564, 10402630, 10526069, 10474902, 10363894, 10500630, 10474769, 10470628, 10500445, 10437311, 10461909, 10550102, 10555118, 10357590, 10382152, 10593526, 10407291, 10587508, 10518686, 10432362, 10350823, 10491486, 10491014, 10587892, 10579219, 10354588, 10381072, 10469613,…	1.55937e-07
MF	ribonucleotide binding	10520304, 10352767, 10507347, 10581737, 10553788, 10396030, 10461856, 10380025, 10347232, 10388018, 10484457, 10504470, 10454564, 10402630, 10526069, 10474902, 10363894, 10500630, 10474769, 10470628, 10500445, 10437311, 10461909, 10550102, 10555118, 10357590, 10382152, 10593526, 10407291, 10587508, 10518686, 10432362, 10350823, 10491486, 10491014, 10587892, 10579219, 10354588, 10381072, 10469613,…	1.55937e-07
BP	M phase of mitotic cell cycle	10344939, 10421029, 10352767, 10419323, 10524105, 10365578, 10525591, 10593060, 10381072, 10360985, 10538832, 10459844, 10459755, 10516246, 10400589, 10448506, 10594426, 10386909, 10462973, 10591781, 10509820, 10583952, 10494281, 10361651, 10517060, 10365627, 10361375, 10465861, 10462796, 10474769, 10460738, 10487480, 10577492, 10383853, 10462632, 10515744, 10516894, 10585129, 10399087	2.96479e-07
MF	purine nucleotide binding	10520304, 10352767, 10507347, 10581737, 10553788, 10396030, 10461856, 10380025, 10347232, 10388018, 10484457, 10504470, 10454564, 10402630, 10526069, 10474902, 10363894, 10500630, 10474769, 10470628, 10500445, 10437311, 10461909, 10550102, 10555118, 10357590, 10382152, 10593526, 10407291, 10587508, 10518686, 10432362, 10350823, 10491486, 10491014, 10587892, 10579219, 10354588, 10381072, 10469613,…	3.2329e-07
BP	mitotic cell cycle	10344939, 10421029, 10352767, 10419323, 10524105, 10365578, 10525591, 10593060, 10381072, 10360985, 10538832, 10459844, 10459755, 10516246, 10528340, 10400589, 10592201, 10448506, 10594426, 10386909, 10462973, 10591781, 10509820, 10528077, 10583952, 10494281, 10361651, 10592790, 10365627, 10517060, 10361375, 10465861, 10462796, 10474769, 10460738, 10487480, 10577492, 10383853, 10462632, 10515744,…	3.45181e-07
MF	nucleotide binding	10520304, 10352767, 10461354, 10507347, 10581737, 10524169, 10553788, 10396030, 10461856, 10380025, 10347232, 10388018, 10484457, 10504470, 10369738, 10494452, 10454564, 10402630, 10526069, 10474902, 10363894, 10500630, 10514352, 10474769, 10470628, 10500445, 10568217, 10437311, 10461909, 10550102, 10555118, 10357590, 10382152, 10593526, 10407291, 10587508, 10518686, 10599554, 10432362, 10350823,…	4.23598e-07
BP	DNA-dependent DNA replication	10534974, 10372766, 10546163, 10562818, 10395049, 10572906, 10353420, 10367076, 10527801, 10578557, 10433910, 10562563, 10474902, 10354085, 10363575	4.29998e-07
MF	RNA binding	10517159, 10521481, 10461354, 10391461, 10374793, 10542034, 10580131, 10438313, 10387492, 10595159, 10591357, 10482181, 10579703, 10382935, 10421981, 10494452, 10451721, 10426827, 10529425, 10514352, 10582823, 10389701, 10590549, 10464819, 10347774, 10458391, 10553993, 10367122, 10565089, 10512067, 10546104, 10516974, 10504703, 10599554, 10512165, 10564211, 10375880, 10345077, 10579219, 10372877,…	6.76897e-07
BP	cell division	10344939, 10421029, 10352767, 10524105, 10365578, 10525591, 10593060, 10573451, 10381072, 10538832, 10459844, 10459755, 10490304, 10568968, 10516246, 10400589, 10448506, 10346365, 10594426, 10386909, 10541524, 10462973, 10591781, 10509820, 10583952, 10361651, 10554445, 10365627, 10517060, 10361375, 10465861, 10462796, 10474769, 10389269, 10460738, 10487480, 10577492, 10572906, 10523802, 10550102,…	8.35834e-07
BP	mitosis	10344939, 10421029, 10352767, 10524105, 10365578, 10525591, 10593060, 10381072, 10538832, 10459844, 10459755, 10516246, 10400589, 10448506, 10594426, 10386909, 10462973, 10591781, 10509820, 10583952, 10494281, 10361651, 10517060, 10365627, 10361375, 10465861, 10462796, 10474769, 10460738, 10577492, 10487480, 10383853, 10462632, 10515744, 10516894, 10585129, 10399087	1.56403e-06
BP	nuclear division	10344939, 10421029, 10352767, 10524105, 10365578, 10525591, 10593060, 10381072, 10538832, 10459844, 10459755, 10516246, 10400589, 10448506, 10594426, 10386909, 10462973, 10591781, 10509820, 10583952, 10494281, 10361651, 10517060, 10365627, 10361375, 10465861, 10462796, 10474769, 10460738, 10577492, 10487480, 10383853, 10462632, 10515744, 10516894, 10585129, 10399087	1.56403e-06
BP	organelle fission	10344939, 10421029, 10352767, 10524105, 10365578, 10525591, 10593060, 10381072, 10538832, 10459844, 10459755, 10516246, 10400589, 10448506, 10594426, 10386909, 10462973, 10591781, 10509820, 10583952, 10494281, 10361651, 10517060, 10365627, 10361375, 10465861, 10462796, 10474769, 10460738, 10577492, 10487480, 10383853, 10462632, 10515744, 10516894, 10585129, 10399087	3.10295e-06
BP	meiosis I	10389627, 10427166, 10365627, 10361375, 10540738, 10419465, 10573451, 10430555, 10421325, 10565089, 10568968, 10359801, 10474902	6.32253e-06
MF	DNA binding	10517159, 10442302, 10492123, 10391461, 10358210, 10524169, 10592870, 10396030, 10388409, 10352048, 10369690, 10347232, 10482181, 10541524, 10410947, 10370708, 10454564, 10474902, 10543471, 10389283, 10447521, 10500630, 10444853, 10463739, 10491477, 10594001, 10500445, 10417734, 10419296, 10487564, 10349295, 10550102, 10359801, 10520521, 10363195, 10593526, 10397440, 10365355, 10369688, 10486026,…	8.57404e-06
BP	chromosome organization	10574996, 10352767, 10546163, 10538832, 10388409, 10573261, 10568968, 10387492, 10386909, 10430649, 10369738, 10543471, 10365627, 10540738, 10500445, 10445909, 10464819, 10367122, 10577222, 10565089, 10520521, 10359801, 10531776, 10585129, 10515257, 10479765, 10491385, 10344939, 10491014, 10604405, 10348879, 10425559, 10419759, 10419465, 10573451, 10352242, 10521136, 10451860, 10346365, 10462973,…	9.97706e-06
BP	double-strand break repair	10425632, 10355711, 10354418, 10447395, 10388409, 10347232, 10531776, 10470665, 10527801, 10410947, 10441815, 10474902, 10583264, 10515257	1.75375e-05
BP	chromosome segregation	10361651, 10427166, 10389627, 10352767, 10465861, 10431182, 10365627, 10365578, 10460738, 10360985, 10538832, 10507557, 10459755, 10585129, 10346365, 10433910, 10526797, 10583952	1.77207e-05
BP	stem cell differentiation	10402514, 10517159, 10444853, 10347232, 10491477, 10391490, 10397440, 10541524, 10421325, 10360985, 10472058	4.0671e-05
BP	negative regulation of DNA metabolic process	10451860, 10508151, 10546834, 10527801, 10408321, 10407543, 10447417, 10564978, 10447395	4.36802e-05
BP	response to ionizing radiation	10563303, 10425632, 10355711, 10588899, 10354418, 10447395, 10524266, 10594053, 10531776, 10593526, 10527801, 10410947, 10441815, 10515257	5.65485e-05
BP	cell cycle checkpoint	10592790, 10508151, 10587892, 10524105, 10354418, 10538832, 10447395, 10594053, 10531776, 10592201, 10585129, 10593526, 10594426, 10456439, 10456490, 10456414	5.91542e-05
BP	DNA recombination	10389627, 10425632, 10447417, 10430555, 10354418, 10447395, 10550102, 10388409, 10549057, 10352048, 10451860, 10347232, 10527801, 10410947, 10564978, 10474902, 10515257	7.01129e-05
BP	sexual reproduction	10574996, 10415472, 10492123, 10539617, 10507347, 10419465, 10580131, 10356886, 10490304, 10595159, 10482181, 10550730, 10426118, 10369738, 10451721, 10361956, 10482249, 10377662, 10389627, 10497258, 10365627, 10522530, 10361375, 10563303, 10540738, 10546834, 10506004, 10421325, 10430555, 10447395, 10543259, 10458391, 10432986, 10359801, 10352558, 10363195, 10527801, 10593526, 10510305, 10592336	0.000104317
MF	DNA-dependent ATPase activity	10406482, 10389627, 10372766, 10347232, 10425632, 10454564, 10438690, 10564978, 10389395, 10474902, 10430555, 10363575	0.000121152
MF	nucleotidyltransferase activity	10459655, 10378088, 10418131, 10523563, 10461354, 10374793, 10562818, 10420877, 10524169, 10476691, 10507418, 10367076, 10578557, 10475965, 10421351, 10370708, 10365355, 10400391, 10354085, 10557035, 10540391	0.000157655
BP	gamete generation	10574996, 10415472, 10492123, 10539617, 10507347, 10419465, 10580131, 10356886, 10482181, 10550730, 10426118, 10369738, 10451721, 10361956, 10482249, 10377662, 10389627, 10497258, 10365627, 10522530, 10361375, 10563303, 10540738, 10546834, 10506004, 10430555, 10421325, 10458391, 10447395, 10543259, 10359801, 10352558, 10363195, 10527801, 10593526, 10510305	0.000264205
BP	germ cell development	10377662, 10415472, 10497258, 10361375, 10539617, 10522530, 10563303, 10419465, 10506004, 10430555, 10458391, 10543259, 10447395, 10482181, 10527801, 10510305, 10451721, 10361956	0.000331258
MF	nuclease activity	10423629, 10389627, 10397719, 10524659, 10479749, 10423068, 10374793, 10562818, 10590549, 10347774, 10395049, 10404187, 10396030, 10352048, 10551173, 10385842, 10421981, 10408666, 10376959, 10583264, 10354649, 10363575	0.000349376
BP	reproductive cellular process	10574996, 10377662, 10415472, 10497258, 10361375, 10539617, 10522530, 10563303, 10419465, 10506004, 10495111, 10421325, 10430555, 10458391, 10543259, 10447395, 10359801, 10482181, 10527801, 10510305, 10451721, 10592336, 10361956	0.000369028
MF	ATP-dependent DNA helicase activity	10372766, 10347232, 10425632, 10454564, 10564978, 10389395, 10363575	0.00043206
BP	tRNA metabolic process	10423629, 10395807, 10487969, 10524659, 10479749, 10500218, 10458607, 10573401, 10359386, 10583634, 10355931, 10573434, 10405971, 10484457, 10368511, 10408666, 10376959, 10439985, 10444605, 10488748, 10540391	0.000800017
BP	male meiosis	10389627, 10359801, 10527801, 10526797, 10430555, 10582501, 10490304, 10479765	0.000821575
BP	male gamete generation	10415472, 10492123, 10539617, 10507347, 10419465, 10580131, 10356886, 10482181, 10550730, 10369738, 10426118, 10451721, 10361956, 10482249, 10389627, 10377662, 10497258, 10365627, 10522530, 10563303, 10546834, 10506004, 10430555, 10421325, 10359801, 10352558, 10363195, 10527801	0.00087691
BP	spermatogenesis	10415472, 10492123, 10539617, 10507347, 10419465, 10580131, 10356886, 10482181, 10550730, 10369738, 10426118, 10451721, 10361956, 10482249, 10389627, 10377662, 10497258, 10365627, 10522530, 10563303, 10546834, 10506004, 10430555, 10421325, 10359801, 10352558, 10363195, 10527801	0.00087691
MF	structure-specific DNA binding	10534974, 10354542, 10452118, 10508151, 10447417, 10430555, 10354418, 10447395, 10352048, 10369690, 10451860, 10369702, 10527801, 10453334, 10369688, 10427214, 10543471	0.0010025
BP	tRNA processing	10423629, 10395807, 10487969, 10479749, 10524659, 10573401, 10583634, 10405971, 10484457, 10368511, 10408666, 10376959, 10439985, 10488748, 10540391	0.0010183
BP	regulation of cell cycle	10508151, 10587892, 10524105, 10360985, 10538832, 10592201, 10541524, 10594426, 10426118, 10407543, 10408321, 10451721, 10528077, 10488748, 10456490, 10592790, 10361375, 10563303, 10389269, 10354418, 10447395, 10594053, 10364950, 10531776, 10585129, 10527801, 10593526, 10456439, 10562563, 10456414	0.00125028
MF	magnesium ion binding	10459655, 10415742, 10457733, 10350823, 10521709, 10491486, 10352767, 10407481, 10507347, 10360863, 10553788, 10469070, 10524266, 10352048, 10355931, 10484457, 10352503, 10425158, 10571657, 10542757, 10384373, 10388234, 10540391, 10478447, 10449527, 10523563, 10529142, 10402283, 10577492, 10587266, 10408348, 10395049, 10363498, 10461909, 10550102, 10523802, 10347748, 10602865, 10357590, 10530319,…	0.00131801
BP	regulation of DNA metabolic process	10451860, 10508151, 10531776, 10546834, 10527801, 10506118, 10408321, 10407543, 10447417, 10564978, 10447395, 10363575	0.00153013
BP	prophase	10568968, 10359801, 10361375, 10573451, 10430555, 10421325	0.00159636
BP	meiotic prophase I	10568968, 10359801, 10361375, 10573451, 10430555, 10421325	0.00159636
BP	negative regulation of DNA recombination	10451860, 10546834, 10447417, 10564978, 10447395	0.00173422
BP	positive regulation of interferon-beta production	10476691, 10512067, 10421351, 10365355, 10410877	0.00173422
BP	response to gamma radiation	10524266, 10594053, 10563303, 10527801, 10410947, 10441815, 10588899	0.0017661
BP	multicellular organism reproduction	10574996, 10415472, 10492123, 10539617, 10507347, 10372069, 10419465, 10580131, 10356886, 10482181, 10550730, 10426118, 10369738, 10451721, 10427214, 10361956, 10482249, 10377662, 10389627, 10497258, 10365627, 10522530, 10361375, 10563303, 10540738, 10546834, 10506004, 10421325, 10430555, 10458391, 10543259, 10447395, 10359801, 10352558, 10363195, 10527801, 10593526, 10510305	0.00209366
BP	reproductive process in a multicellular organism	10574996, 10415472, 10492123, 10539617, 10507347, 10372069, 10419465, 10580131, 10356886, 10482181, 10550730, 10426118, 10369738, 10451721, 10427214, 10361956, 10482249, 10377662, 10389627, 10497258, 10365627, 10522530, 10361375, 10563303, 10540738, 10546834, 10506004, 10421325, 10430555, 10458391, 10543259, 10447395, 10359801, 10352558, 10363195, 10527801, 10593526, 10510305	0.00209366
BP	response to radiation	10522530, 10563303, 10546834, 10506118, 10425632, 10447417, 10355711, 10588899, 10354418, 10447395, 10524266, 10594053, 10531776, 10527801, 10593526, 10410947, 10454564, 10441815, 10515257	0.00220149
MF	RNA polymerase activity	10476691, 10418131, 10367076, 10475965, 10578557, 10421351, 10370708, 10365355, 10400391, 10557035	0.00245748
MF	DNA-directed RNA polymerase activity	10476691, 10418131, 10367076, 10475965, 10578557, 10421351, 10370708, 10365355, 10400391, 10557035	0.00245748
BP	chromosome organization involved in meiosis	10568968, 10359801, 10365627, 10540738, 10419465, 10573451, 10565089	0.00252688
BP	synapsis	10568968, 10359801, 10365627, 10540738, 10419465, 10573451, 10565089	0.00252688
MF	DNA helicase activity	10534974, 10372766, 10347232, 10425632, 10454564, 10564978, 10389395, 10363575	0.00262899
BP	mitotic cell cycle checkpoint	10594053, 10524105, 10593526, 10585129, 10594426, 10456439, 10538832, 10456490, 10456414	0.00291907
BP	gene silencing	10517159, 10359801, 10484457, 10445458, 10472782, 10382935, 10369738, 10504703, 10462973, 10421325, 10438313, 10367122	0.00316862
BP	response to abiotic stimulus	10506118, 10425632, 10355711, 10588899, 10524266, 10482181, 10410947, 10454564, 10361956, 10563303, 10522530, 10546834, 10491477, 10577973, 10447417, 10587266, 10354418, 10447395, 10575476, 10594053, 10531776, 10527801, 10593526, 10441815, 10515257	0.0034549
MF	ribonuclease activity	10423629, 10551173, 10479749, 10421981, 10524659, 10374793, 10590549, 10408666, 10347774, 10395049	0.00448134
BP	stem cell maintenance	10402514, 10444853, 10491477, 10397440, 10541524, 10421325, 10472058	0.00475019
BP	mRNA transport	10361651, 10420572, 10582599, 10365578, 10387992, 10372687, 10382542, 10385052, 10470973, 10453334, 10494452, 10504703, 10473650	0.00496345
BP	sister chromatid cohesion	10389627, 10365627, 10431182, 10346365, 10526797	0.00540108
BP	positive regulation of type I interferon production	10476691, 10512067, 10421351, 10365355, 10410877	0.00540108
MF	damaged DNA binding	10459655, 10391461, 10423068, 10420877, 10447417, 10474902, 10354085, 10447395	0.00560427
BP	negative regulation of macromolecule metabolic process	10517159, 10508151, 10520445, 10362922, 10438313, 10377588, 10484457, 10382935, 10541524, 10407543, 10369738, 10482249, 10500960, 10444853, 10563303, 10491477, 10447417, 10547769, 10487564, 10430066, 10367122, 10349295, 10594053, 10359801, 10504703, 10466374, 10490016, 10468275, 10360985, 10451860, 10445458, 10408321, 10462973, 10564978, 10477543, 10466888, 10592790, 10378088, 10377662, 10522712,…	0.0056992
BP	female gamete generation	10377662, 10492123, 10361375, 10593526, 10527801, 10369738, 10451721, 10580131, 10430555, 10421325	0.00607205
BP	meiotic sister chromatid cohesion	10389627, 10365627, 10346365, 10526797	0.00608226
BP	gene silencing by RNA	10517159, 10359801, 10484457, 10445458, 10382935, 10504703, 10421325, 10438313	0.00619559
BP	stem cell development	10402514, 10444853, 10491477, 10397440, 10541524, 10421325, 10472058	0.00628533
BP	one-carbon metabolic process	10574996, 10420385, 10386604, 10419759, 10453544, 10421325, 10367122, 10577222, 10359801, 10396610, 10368511, 10545672, 10462973, 10437748, 10392098, 10565486, 10479765	0.00656724
BP	oogenesis	10377662, 10492123, 10361375, 10527801, 10451721, 10580131, 10430555, 10421325	0.00773739
BP	methylation	10574996, 10420385, 10419759, 10453544, 10421325, 10367122, 10577222, 10359801, 10368511, 10462973, 10437748, 10392098, 10565486, 10479765	0.00785896
BP	meiotic chromosome segregation	10389627, 10427166, 10365627, 10346365, 10526797	0.0083758
BP	DNA replication initiation	10353420, 10534974, 10546163, 10562563, 10572906	0.0083758
BP	establishment of RNA localization	10361651, 10420572, 10582599, 10365578, 10387992, 10372687, 10382542, 10385052, 10470973, 10453334, 10494452, 10504703, 10473650	0.00853503
BP	nucleic acid transport	10361651, 10420572, 10582599, 10365578, 10387992, 10372687, 10382542, 10385052, 10470973, 10453334, 10494452, 10504703, 10473650	0.00853503
BP	RNA transport	10361651, 10420572, 10582599, 10365578, 10387992, 10372687, 10382542, 10385052, 10470973, 10453334, 10494452, 10504703, 10473650	0.00853503
BP	RNA localization	10361651, 10420572, 10582599, 10365578, 10387992, 10372687, 10382542, 10385052, 10470973, 10453334, 10494452, 10504703, 10473650	0.00968289
BP	regulation of mitotic cell cycle	10524105, 10361375, 10389269, 10360985, 10538832, 10594053, 10585129, 10593526, 10527801, 10541524, 10594426, 10456439, 10528077, 10456490, 10456414	0.00996622
BP	spermatid differentiation	10377662, 10415472, 10482181, 10497258, 10539617, 10563303, 10522530, 10419465, 10506004, 10430555	0.0100582
MF	single-stranded DNA binding	10534974, 10452118, 10451860, 10527801, 10453334, 10354418, 10430555, 10543471	0.0105766
BP	DNA damage response, signal transduction	10524266, 10592790, 10594053, 10531776, 10592201, 10587892, 10593526, 10391461, 10527801, 10447417, 10447395	0.0112008
BP	negative regulation of protein ubiquitination	10361375, 10407543, 10362922, 10587266	0.0113651
BP	recombinational repair	10527801, 10354418, 10474902, 10515257, 10388409	0.0122498
BP	double-strand break repair via homologous recombination	10527801, 10354418, 10474902, 10515257, 10388409	0.0122498
BP	cellular response to DNA damage stimulus	10359801, 10385842, 10577866, 10546834, 10583264	0.0122498
BP	nucleobase, nucleoside, nucleotide and nucleic acid transport	10361651, 10420572, 10582599, 10365578, 10387992, 10372687, 10382542, 10385052, 10470973, 10453334, 10494452, 10504703, 10473650	0.0123349
BP	RNA biosynthetic process	10406482, 10500630, 10372766, 10444853, 10421661, 10560487, 10539574, 10454077, 10433672, 10367076, 10578557, 10475965, 10421351, 10370708, 10454564, 10400391, 10441973, 10408168	0.0127479
MF	endonuclease activity, active with either ribo- or deoxyribonucleic acids and producing 5'-phosphomonoesters	10423629, 10479749, 10524659, 10408666, 10347774, 10395049, 10363575	0.0147928
BP	covalent chromatin modification	10574996, 10491385, 10348879, 10491860, 10445909, 10464819, 10367122, 10577222, 10391221, 10472782, 10390153, 10369738, 10462973, 10565486, 10479765	0.0152603
BP	regulation of gene expression, epigenetic	10574996, 10517159, 10359801, 10484457, 10472782, 10391461, 10369738, 10462973, 10421325, 10438313, 10367122, 10565486	0.0152797
BP	DNA integrity checkpoint	10592790, 10594053, 10508151, 10531776, 10592201, 10587892, 10593526, 10447395	0.016802
MF	endonuclease activity	10423629, 10389627, 10352048, 10479749, 10524659, 10376959, 10408666, 10347774, 10395049, 10583264, 10404187, 10363575	0.0170371
BP	regulation of interferon-beta production	10476691, 10512067, 10421351, 10365355, 10410877	0.0171055
BP	transcription	10574996, 10442302, 10492123, 10529330, 10358210, 10571680, 10592870, 10573261, 10405811, 10582642, 10541524, 10369738, 10370708, 10399178, 10454564, 10462683, 10389283, 10447521, 10500630, 10444853, 10463739, 10491477, 10594001, 10539574, 10417734, 10445909, 10349295, 10433492, 10363195, 10397440, 10365355, 10488108, 10561831, 10486026, 10491014, 10348879, 10466374, 10478355, 10419759, 10490016,…	0.0183416
BP	mitotic cell cycle spindle assembly checkpoint	10593526, 10456439, 10538832, 10456490, 10456414	0.0185883
BP	rRNA modification	10375880, 10447521, 10392098, 10600485	0.0185883
BP	negative regulation of mitotic metaphase/anaphase transition	10593526, 10456439, 10538832, 10456490, 10456414	0.0185883
BP	regulation of cell cycle process	10594053, 10361375, 10593526, 10527801, 10585129, 10456439, 10451721, 10360985, 10528077, 10538832, 10456490, 10456414	0.0189453
MF	tRNA binding	10405971, 10573434, 10445458, 10546104, 10372877, 10540391	0.020587
MF	hydrolase activity, acting on carbon-nitrogen (but not peptide) bonds, in cyclic amidines	10396610, 10545672, 10451665, 10347193, 10571752	0.0216463
BP	spermatid development	10377662, 10415472, 10482181, 10497258, 10539617, 10522530, 10419465, 10506004, 10430555	0.0222446
BP	female meiosis	10389627, 10365627, 10361375, 10526797, 10490304	0.0230075
BP	regulation of type I interferon production	10476691, 10512067, 10421351, 10365355, 10410877	0.0230075
BP	histone modification	10574996, 10491385, 10348879, 10491860, 10445909, 10464819, 10367122, 10577222, 10391221, 10472782, 10390153, 10369738, 10565486, 10479765	0.0230638
BP	response to UV	10594053, 10563303, 10546834, 10527801, 10506118, 10454564, 10447417, 10447395	0.0233958
MF	endoribonuclease activity, producing 5'-phosphomonoesters	10423629, 10479749, 10524659, 10408666, 10347774, 10395049	0.0255339
BP	negative regulation of mitosis	10593526, 10456439, 10538832, 10456490, 10456414	0.0278059
BP	non-recombinational repair	10347232, 10410947, 10425632, 10355711	0.0278059
BP	double-strand break repair via nonhomologous end joining	10347232, 10410947, 10425632, 10355711	0.0278059
BP	spindle checkpoint	10593526, 10456439, 10538832, 10456490, 10456414	0.0278059
BP	negative regulation of nuclear division	10593526, 10456439, 10538832, 10456490, 10456414	0.0278059
BP	DNA damage checkpoint	10592790, 10594053, 10531776, 10592201, 10587892, 10593526, 10447395	0.0332884
BP	telomere organization	10344939, 10387492, 10451860, 10564978, 10352242, 10543471	0.033417
MF	exonuclease activity, active with either ribo- or deoxyribonucleic acids and producing 5'-phosphomonoesters	10352048, 10551173, 10423068, 10374793, 10590549	0.0359534
BP	regulation of DNA replication	10508151, 10527801, 10408321, 10407543, 10363575	0.0381158
MF	N-acetyltransferase activity	10485483, 10465638, 10391221, 10472782, 10404578, 10390153, 10445909, 10531553	0.0381181
MF	N-acyltransferase activity	10485483, 10465638, 10391221, 10472782, 10404578, 10390153, 10445909, 10531553, 10468929	0.0385339
BP	GO:0008629~induction of apoptosis by intracellular signals	10594053, 10563303, 10593526, 10391461, 10527801, 10447417, 10588899	0.0389352
BP	somatic recombination of immunoglobulin genes during immune response	10352048, 10410947, 10447417, 10447395	0.0390083
BP	synaptonemal complex assembly	10568968, 10365627, 10573451, 10565089	0.0390083
BP	isotype switching	10352048, 10410947, 10447417, 10447395	0.0390083
BP	folic acid and derivative metabolic process	10396610, 10545672, 10388718, 10566034	0.0390083
BP	somatic diversification of immunoglobulins during immune response	10352048, 10410947, 10447417, 10447395	0.0390083
BP	negative regulation of nucleobase, nucleoside, nucleotide and nucleic acid metabolic process	10508151, 10520445, 10466374, 10490016, 10468275, 10360985, 10377588, 10451860, 10541524, 10408321, 10369738, 10407543, 10564978, 10462973, 10477543, 10466888, 10482249, 10500960, 10378088, 10592790, 10444853, 10522712, 10546834, 10491477, 10447417, 10587266, 10487564, 10447395, 10404848, 10430066, 10367122, 10349295, 10594053, 10359801, 10472782, 10527801	0.0400693
MF	ribonucleoside binding	10418131, 10475965, 10365355	0.0404523
MF	snoRNA binding	10529425, 10375880, 10502146	0.0404523
BP	female meiosis sister chromatid cohesion	10389627, 10365627, 10526797	0.0418583
BP	DNA replication, synthesis of RNA primer	10372766, 10367076, 10578557	0.0418583
BP	nucleolus organization	10463535, 10433672, 10475965	0.0418583
BP	spliceosomal snRNP biogenesis	10574996, 10444595, 10419759	0.0418583
BP	biopolymer methylation	10574996, 10359801, 10419759, 10462973, 10437748, 10421325, 10392098, 10367122, 10565486, 10577222, 10479765	0.0450849
BP	negative regulation of nitrogen compound metabolic process	10508151, 10520445, 10466374, 10490016, 10468275, 10360985, 10377588, 10451860, 10541524, 10408321, 10369738, 10407543, 10564978, 10462973, 10477543, 10466888, 10482249, 10500960, 10378088, 10592790, 10444853, 10522712, 10546834, 10491477, 10447417, 10587266, 10487564, 10447395, 10404848, 10430066, 10367122, 10349295, 10594053, 10359801, 10472782, 10527801	0.0453051
BP	cellular macromolecular complex assembly	10574996, 10361375, 10546163, 10419759, 10420035, 10441107, 10567797, 10378508, 10543259, 10458430, 10555118, 10573261, 10595159, 10385052, 10520521, 10355806, 10484457, 10444595, 10386909, 10395893, 10462973, 10456414	0.046774
BP	macromolecular complex assembly	10574996, 10421661, 10546163, 10419759, 10378508, 10458430, 10573261, 10385052, 10595159, 10433672, 10484457, 10444595, 10386909, 10575052, 10395893, 10462973, 10441973, 10361375, 10563303, 10420035, 10441107, 10567797, 10568217, 10543259, 10454077, 10555118, 10594053, 10520521, 10355806, 10585129, 10456414	0.0472251
BP	somatic diversification of immune receptors via germline recombination within a single locus	10352048, 10410947, 10425632, 10447417, 10447395	0.0473614
BP	regulation of DNA recombination	10451860, 10546834, 10447417, 10564978, 10447395	0.0473614
BP	somatic cell DNA recombination	10352048, 10410947, 10425632, 10447417, 10447395	0.0473614
BP	somatic diversification of immune receptors	10352048, 10410947, 10425632, 10447417, 10447395	0.0473614
MF	acetyltransferase activity	10593367, 10485483, 10465638, 10391221, 10472782, 10404578, 10390153, 10445909, 10531553	0.0482952
MF	exonuclease activity	10352048, 10397719, 10551173, 10423068, 10421981, 10374793, 10562818, 10590549, 10583264	0.0482952
MF	ribonuclease P activity	10423629, 10479749, 10524659, 10408666	0.049794
E11.5 ♂+♀ germ cell depleted
Category	Term	Transcript cluster IDs	p-value
MF	cytoskeletal protein binding	10368675, 10457273, 10509901, 10380477, 10425852, 10553598, 10587446, 10357191, 10411519, 10384885, 10572747, 10377319, 10533659, 10377689, 10553833, 10379262, 10417095, 10607865, 10355536, 10542200, 10605884, 10605437, 10396511, 10537184, 10559207, 10453636, 10362596, 10454786, 10521222, 10398267, 10396485, 10380341, 10396606, 10512499, 10518585, 10472097, 10409464, 10556426, 10396608	6.26458e-06
BP	ossification	10357043, 10490203, 10365559, 10354494, 10498383, 10445078, 10498379, 10476395, 10594404, 10405605, 10498284, 10381006, 10421361, 10569344, 10379262, 10415052	7.47981e-06
BP	positive regulation of transcription, DNA-dependent	10603708, 10604393, 10435237, 10513008, 10365559, 10506031, 10423902, 10514054, 10440491, 10359870, 10506050, 10552874, 10514466, 10476395, 10405400, 10594404, 10541895, 10464084, 10405605, 10604347, 10381006, 10544114, 10416657, 10424400, 10408450, 10501586, 10399725, 10523670, 10453678, 10498284, 10520048, 10453857, 10391301, 10575160, 10413185, 10397346	7.94063e-06
BP	positive regulation of RNA metabolic process	10603708, 10604393, 10435237, 10513008, 10365559, 10506031, 10423902, 10514054, 10440491, 10359870, 10506050, 10552874, 10514466, 10476395, 10405400, 10594404, 10541895, 10464084, 10405605, 10604347, 10381006, 10544114, 10416657, 10424400, 10408450, 10501586, 10399725, 10523670, 10453678, 10498284, 10520048, 10453857, 10391301, 10575160, 10413185, 10397346	1.00168e-05
BP	response to wounding	10357043, 10344966, 10408915, 10497817, 10467139, 10381096, 10371959, 10387372, 10478048, 10559261, 10476395, 10398267, 10487011, 10488378, 10541895, 10377319, 10459089, 10391301, 10571696, 10365482, 10363173, 10379262, 10415844, 10485070	1.28059e-05
BP	positive regulation of transcription from RNA polymerase II promoter	10603708, 10604393, 10435237, 10513008, 10365559, 10506031, 10423902, 10514054, 10440491, 10359870, 10506050, 10552874, 10514466, 10476395, 10594404, 10464084, 10541895, 10405605, 10381006, 10544114, 10416657, 10424400, 10408450, 10501586, 10399725, 10453678, 10498284, 10453857, 10391301, 10575160, 10413185, 10397346	1.33917e-05
BP	regulation of transcription from RNA polymerase II promoter	10472965, 10603708, 10604393, 10435237, 10513008, 10365559, 10506031, 10387372, 10423902, 10436830, 10514054, 10440491, 10564527, 10359870, 10506050, 10552874, 10514466, 10476395, 10405400, 10594404, 10541895, 10464084, 10405605, 10381006, 10544114, 10416657, 10410766, 10424400, 10408450, 10446763, 10501586, 10594879, 10475625, 10399725, 10384504, 10456566, 10453678, 10498284, 10391301, 10453857,…	2.61677e-05
BP	positive regulation of transcription	10603708, 10604393, 10431726, 10435237, 10513008, 10365559, 10506031, 10423902, 10514054, 10440491, 10359870, 10506050, 10552874, 10514466, 10476395, 10405400, 10564451, 10594404, 10541895, 10464084, 10405605, 10604347, 10381006, 10544114, 10416657, 10424400, 10408450, 10501586, 10399725, 10523670, 10453678, 10498284, 10520048, 10453857, 10391301, 10413185, 10575160, 10397346	3.49056e-05
BP	cell motion	10458843, 10576639, 10503659, 10482448, 10581890, 10564527, 10440491, 10478048, 10372891, 10380896, 10457644, 10377319, 10472820, 10476021, 10553833, 10436519, 10366052, 10495416, 10410766, 10355536, 10396511, 10543791, 10362596, 10398267, 10396485, 10390117, 10352867, 10396606, 10363173, 10396608, 10415052	3.61362e-05
BP	bone development	10357043, 10490203, 10365559, 10354494, 10498383, 10445078, 10498379, 10476395, 10594404, 10405605, 10498284, 10381006, 10421361, 10569344, 10379262, 10415052	4.17476e-05
BP	positive regulation of gene expression	10603708, 10604393, 10431726, 10435237, 10513008, 10365559, 10506031, 10423902, 10514054, 10440491, 10359870, 10506050, 10552874, 10514466, 10476395, 10405400, 10564451, 10594404, 10541895, 10464084, 10405605, 10604347, 10381006, 10544114, 10416657, 10424400, 10408450, 10501586, 10399725, 10523670, 10453678, 10498284, 10520048, 10453857, 10391301, 10413185, 10575160, 10397346	5.24991e-05
BP	positive regulation of macromolecule metabolic process	10603708, 10604393, 10427420, 10431726, 10435237, 10513008, 10365559, 10506031, 10423902, 10514054, 10440491, 10359870, 10506050, 10552874, 10514466, 10564451, 10476395, 10405400, 10594404, 10541895, 10464084, 10405605, 10604347, 10381006, 10544114, 10366052, 10416657, 10346651, 10357043, 10424400, 10408450, 10501586, 10586933, 10559261, 10399725, 10523670, 10453678, 10498284, 10520048, 10391301,…	6.04532e-05
BP	positive regulation of cellular biosynthetic process	10603708, 10604393, 10431726, 10435237, 10513008, 10365559, 10506031, 10499811, 10423902, 10514054, 10440491, 10359870, 10506050, 10552874, 10514466, 10476395, 10405400, 10564451, 10594404, 10541895, 10464084, 10405605, 10604347, 10381006, 10544114, 10416657, 10424400, 10408450, 10501586, 10399725, 10523670, 10453678, 10498284, 10520048, 10453857, 10391301, 10413185, 10575160, 10372745, 10397346	8.20172e-05
BP	positive regulation of nucleobase, nucleoside, nucleotide and nucleic acid metabolic process	10603708, 10604393, 10431726, 10435237, 10513008, 10365559, 10506031, 10499811, 10423902, 10514054, 10440491, 10359870, 10506050, 10552874, 10514466, 10476395, 10405400, 10564451, 10594404, 10541895, 10464084, 10405605, 10604347, 10381006, 10544114, 10416657, 10424400, 10408450, 10501586, 10399725, 10523670, 10453678, 10498284, 10520048, 10453857, 10391301, 10413185, 10575160, 10397346	8.33847e-05
BP	positive regulation of macromolecule biosynthetic process	10603708, 10604393, 10431726, 10435237, 10513008, 10365559, 10506031, 10423902, 10514054, 10440491, 10359870, 10506050, 10552874, 10514466, 10476395, 10405400, 10564451, 10594404, 10541895, 10464084, 10405605, 10604347, 10381006, 10544114, 10416657, 10424400, 10408450, 10501586, 10399725, 10523670, 10453678, 10498284, 10520048, 10453857, 10391301, 10413185, 10575160, 10372745, 10397346	8.89127e-05
BP	positive regulation of biosynthetic process	10603708, 10604393, 10431726, 10435237, 10513008, 10365559, 10506031, 10499811, 10423902, 10514054, 10440491, 10359870, 10506050, 10552874, 10514466, 10476395, 10405400, 10564451, 10594404, 10541895, 10464084, 10405605, 10604347, 10381006, 10544114, 10416657, 10424400, 10408450, 10501586, 10399725, 10523670, 10453678, 10498284, 10520048, 10453857, 10391301, 10413185, 10575160, 10372745, 10397346	9.23389e-05
BP	skeletal system development	10473847, 10472965, 10490203, 10365559, 10354494, 10359870, 10476395, 10594404, 10405605, 10381006, 10421361, 10601360, 10379262, 10357043, 10424400, 10498383, 10445078, 10461844, 10498379, 10453678, 10498284, 10459089, 10365290, 10569344, 10415052	0.000114014
BP	blood vessel morphogenesis	10447708, 10547100, 10576639, 10536499, 10371959, 10501586, 10449303, 10423902, 10346564, 10564527, 10384504, 10457644, 10401238, 10399360, 10405605, 10380219, 10363173, 10379262, 10502655, 10413185, 10601360, 10415052	0.000118452
BP	blood vessel development	10447708, 10547100, 10503196, 10503172, 10576639, 10503174, 10503176, 10371959, 10449303, 10503208, 10423902, 10346564, 10564527, 10457644, 10401238, 10405605, 10380219, 10379262, 10601360, 10503161, 10503186, 10503184, 10504424, 10503182, 10536499, 10503168, 10501586, 10503188, 10453830, 10384504, 10399360, 10503222, 10363173, 10502655, 10413185, 10415052	0.000134709
BP	positive regulation of nitrogen compound metabolic process	10603708, 10604393, 10431726, 10435237, 10513008, 10365559, 10506031, 10499811, 10423902, 10514054, 10440491, 10359870, 10506050, 10552874, 10514466, 10476395, 10405400, 10564451, 10594404, 10541895, 10464084, 10405605, 10604347, 10381006, 10544114, 10416657, 10424400, 10408450, 10501586, 10399725, 10523670, 10453678, 10498284, 10520048, 10453857, 10391301, 10413185, 10575160, 10397346	0.000141294
BP	neuron development	10536297, 10357043, 10458843, 10380477, 10576639, 10503659, 10386789, 10553598, 10401382, 10587446, 10440491, 10383758, 10411519, 10545629, 10461844, 10380896, 10398267, 10377319, 10553833, 10601360, 10436519, 10569429	0.000142026
BP	cell migration	10495416, 10410766, 10355536, 10576639, 10482448, 10581890, 10396511, 10543791, 10564527, 10372891, 10362596, 10478048, 10457644, 10396485, 10390117, 10377319, 10352867, 10396606, 10472820, 10553833, 10363173, 10396608, 10366052, 10415052	0.000215473
BP	vasculature development	10447708, 10547100, 10503196, 10503172, 10576639, 10503174, 10503176, 10371959, 10449303, 10503208, 10423902, 10346564, 10564527, 10457644, 10401238, 10405605, 10380219, 10379262, 10601360, 10503161, 10503186, 10503184, 10504424, 10503182, 10536499, 10503168, 10501586, 10503188, 10453830, 10384504, 10399360, 10503222, 10363173, 10502655, 10413185, 10415052	0.000215523
BP	neuron projection development	10536297, 10357043, 10458843, 10380477, 10576639, 10503659, 10386789, 10553598, 10401382, 10587446, 10440491, 10411519, 10380896, 10398267, 10377319, 10553833, 10601360, 10436519	0.000436074
BP	regulation of cell adhesion	10411782, 10495416, 10357043, 10403584, 10472820, 10435948, 10586844, 10501586, 10379262, 10502655, 10543791, 10415052	0.000438962
BP	regulation of cyclic nucleotide metabolic process	10490203, 10461844, 10484371, 10523727, 10499811, 10501586, 10445078, 10379262, 10393559	0.00045599
MF	actin binding	10368675, 10380477, 10425852, 10553598, 10587446, 10411519, 10384885, 10377319, 10572747, 10607865, 10355536, 10605884, 10605437, 10396511, 10537184, 10559207, 10453636, 10454786, 10521222, 10398267, 10396485, 10396606, 10512499, 10472097, 10409464, 10396608, 10556426	0.000462494
BP	neuron differentiation	10536297, 10458843, 10380477, 10576639, 10503659, 10553598, 10401382, 10587446, 10440491, 10411519, 10380896, 10604347, 10377319, 10553833, 10601360, 10436519, 10357043, 10386789, 10501586, 10383758, 10461844, 10545629, 10398267, 10391301, 10569429	0.000479746
BP	localization of cell	10495416, 10410766, 10355536, 10576639, 10482448, 10581890, 10396511, 10543791, 10564527, 10372891, 10362596, 10478048, 10457644, 10396485, 10390117, 10377319, 10352867, 10396606, 10472820, 10553833, 10363173, 10396608, 10366052, 10415052	0.000543981
BP	cell motility	10495416, 10410766, 10355536, 10576639, 10482448, 10581890, 10396511, 10543791, 10564527, 10372891, 10362596, 10478048, 10457644, 10396485, 10390117, 10377319, 10352867, 10396606, 10472820, 10553833, 10363173, 10396608, 10366052, 10415052	0.000543981
BP	regulation of nucleotide metabolic process	10490203, 10461844, 10484371, 10523727, 10499811, 10501586, 10445078, 10379262, 10393559	0.000558911
BP	cell surface receptor linked signal transduction	10576696, 10365559, 10453604, 10484402, 10440491, 10464251, 10594404, 10502748, 10380896, 10541895, 10464084, 10405605, 10472820, 10553833, 10484371, 10408450, 10501586, 10498383, 10384398, 10529957, 10373093, 10498379, 10461844, 10557960, 10505182, 10490203, 10458843, 10576639, 10503659, 10581890, 10499811, 10522749, 10358389, 10502772, 10411782, 10384885, 10476395, 10416371, 10586844, 10516706,…	0.000579665
BP	biological adhesion	10576639, 10425852, 10581890, 10406519, 10484402, 10440491, 10408850, 10457644, 10431935, 10381006, 10403584, 10472820, 10476021, 10435305, 10405587, 10366052, 10455148, 10357043, 10434782, 10521972, 10506658, 10454786, 10580033, 10399360, 10391103, 10390117, 10491732, 10502655, 10607259, 10556426, 10537770	0.00078607
BP	cell adhesion	10576639, 10425852, 10581890, 10406519, 10484402, 10440491, 10408850, 10457644, 10431935, 10381006, 10403584, 10472820, 10476021, 10435305, 10405587, 10366052, 10455148, 10357043, 10434782, 10521972, 10506658, 10454786, 10580033, 10399360, 10391103, 10390117, 10491732, 10502655, 10607259, 10556426, 10537770	0.00078607
MF	sequence-specific DNA binding	10384150, 10472965, 10604393, 10560481, 10513008, 10504349, 10482448, 10371959, 10387372, 10428755, 10564527, 10359870, 10514466, 10564451, 10420823, 10381006, 10409278, 10569972, 10478928, 10416657, 10410766, 10424400, 10399725, 10384504, 10456566, 10453678, 10453857, 10428536, 10391301, 10428534, 10402063, 10397346	0.000894117
BP	osteoblast differentiation	10476395, 10594404, 10405605, 10498284, 10365559, 10569344, 10445078, 10379262	0.00090903
BP	heart development	10503196, 10503172, 10503174, 10576639, 10503176, 10503208, 10423902, 10346564, 10476395, 10380896, 10594404, 10377319, 10381187, 10571696, 10440522, 10379262, 10503161, 10503186, 10484371, 10503184, 10408450, 10503182, 10503168, 10503188, 10461844, 10453830, 10503222, 10523727, 10582712, 10453857, 10363173, 10413185	0.00100026
BP	regulation of RNA metabolic process	10384150, 10472965, 10357579, 10603708, 10435237, 10365559, 10372796, 10514054, 10428755, 10440491, 10564527, 10506050, 10552874, 10514466, 10401238, 10594404, 10541895, 10464084, 10405605, 10381006, 10420823, 10409278, 10553833, 10569972, 10416657, 10410766, 10424400, 10370544, 10408450, 10446763, 10501586, 10523670, 10456566, 10498284, 10520048, 10453857, 10514255, 10408010, 10575160, 10413185,…	0.00100234
BP	negative regulation of cell differentiation	10576639, 10513008, 10437080, 10386789, 10536499, 10359870, 10454786, 10411782, 10453830, 10557960, 10384504, 10594404, 10604528, 10464084, 10453678, 10498284, 10379262	0.0011401
MF	enzyme binding	10368675, 10356020, 10551570, 10576696, 10536499, 10360227, 10553598, 10499811, 10548105, 10484402, 10566877, 10475625, 10372891, 10500976, 10566846, 10564451, 10457644, 10380341, 10523727, 10586844, 10391301, 10472097	0.00117136
BP	regulation of nervous system development	10357043, 10576639, 10388430, 10437080, 10386789, 10431424, 10365559, 10454786, 10359870, 10453830, 10476395, 10384504, 10379262, 10393559	0.00118334
BP	regulation of cAMP metabolic process	10490203, 10461844, 10484371, 10523727, 10501586, 10445078, 10379262, 10393559	0.00136796
BP	regulation of neurogenesis	10357043, 10576639, 10388430, 10437080, 10386789, 10431424, 10454786, 10359870, 10453830, 10476395, 10384504, 10379262, 10393559	0.00146414
BP	regulation of pigment cell differentiation	10357043, 10461844, 10546450, 10546454, 10546434, 10366052	0.00146695
BP	regulation of melanocyte differentiation	10357043, 10461844, 10546450, 10546454, 10546434, 10366052	0.00146695
BP	developmental growth	10357043, 10594404, 10487011, 10386789, 10365559, 10553598, 10365482, 10553833, 10365290, 10363173, 10413185, 10440491	0.00179554
BP	regulation of protein amino acid phosphorylation	10346651, 10559261, 10357043, 10514466, 10476395, 10380477, 10536499, 10482448, 10589087, 10449303, 10382284, 10366052	0.00179554
BP	regulation of membrane potential	10447708, 10376950, 10362596, 10357043, 10461844, 10380896, 10536499, 10354494, 10496338, 10449303, 10379262, 10406598	0.00179554
MF	transcription factor activity	10384150, 10472965, 10604393, 10560481, 10435237, 10513008, 10504349, 10482448, 10506031, 10571705, 10371959, 10514054, 10428755, 10564527, 10359870, 10506050, 10552874, 10514466, 10564451, 10594404, 10405605, 10420823, 10381006, 10409278, 10569972, 10478928, 10416657, 10410766, 10424400, 10399725, 10523670, 10384504, 10453678, 10391301, 10428536, 10453857, 10408010, 10575160, 10428534, 10416522,…	0.00195156
BP	regulation of transcription, DNA-dependent	10384150, 10472965, 10603708, 10435237, 10365559, 10372796, 10514054, 10428755, 10440491, 10564527, 10506050, 10552874, 10514466, 10594404, 10541895, 10464084, 10405605, 10381006, 10420823, 10409278, 10553833, 10569972, 10416657, 10410766, 10424400, 10370544, 10408450, 10446763, 10501586, 10523670, 10456566, 10498284, 10520048, 10453857, 10514255, 10408010, 10575160, 10413185, 10456522, 10402063,…	0.00218881
BP	cell morphogenesis involved in differentiation	10357043, 10458843, 10576639, 10386789, 10503659, 10553598, 10401382, 10422728, 10440491, 10476395, 10380896, 10398267, 10377319, 10553833, 10601360, 10436519	0.00222484
BP	cell growth	10357043, 10386789, 10542355, 10553598, 10553833, 10563441, 10440491	0.00225422
BP	forebrain development	10410766, 10558090, 10482448, 10401382, 10514054, 10440491, 10564527, 10362596, 10545629, 10461844, 10377319, 10459089, 10601360, 10379262	0.00234973
MF	cysteine-type endopeptidase activity	10561842, 10346562, 10571696, 10410124, 10415844, 10587733, 10360806, 10346564	0.00243946
BP	positive regulation of catalytic activity	10370510, 10357043, 10495416, 10490203, 10484371, 10424400, 10536499, 10482448, 10501586, 10449303, 10406598, 10559261, 10369210, 10461844, 10380341, 10590452, 10379262, 10601360, 10366052	0.00255317
BP	neuron projection morphogenesis	10357043, 10458843, 10576639, 10386789, 10503659, 10553598, 10401382, 10440491, 10380896, 10398267, 10377319, 10553833, 10601360, 10436519	0.00257514
BP	cell morphogenesis involved in neuron differentiation	10357043, 10458843, 10576639, 10386789, 10503659, 10553598, 10401382, 10440491, 10380896, 10398267, 10377319, 10553833, 10601360, 10436519	0.00257514
BP	exocrine pancreas development	10576696, 10408450, 10365559, 10569344	0.0028158
BP	positive regulation of molecular function	10370510, 10357043, 10495416, 10490203, 10484371, 10424400, 10536499, 10482448, 10501586, 10449303, 10406598, 10559261, 10369210, 10461844, 10590452, 10380341, 10379262, 10544114, 10601360, 10485466, 10366052	0.00293947
BP	axonogenesis	10357043, 10458843, 10576639, 10386789, 10503659, 10401382, 10553598, 10440491, 10380896, 10398267, 10377319, 10553833, 10436519	0.00327172
BP	regulation of action potential	10447708, 10376950, 10362596, 10461844, 10380896, 10354494, 10379262, 10406598	0.0033096
BP	cell part morphogenesis	10357043, 10458843, 10576639, 10386789, 10503659, 10553598, 10401382, 10449303, 10440491, 10380896, 10398267, 10498284, 10377319, 10553833, 10601360, 10436519	0.00330976
BP	regulation of phosphorylation	10346651, 10357043, 10495416, 10380477, 10418702, 10536499, 10482448, 10449303, 10440491, 10559261, 10514466, 10476395, 10380341, 10589087, 10571696, 10379262, 10601360, 10382284, 10366052, 10569429, 10542310	0.00332394
BP	regulation of cell development	10357043, 10576639, 10388430, 10437080, 10386789, 10431424, 10454786, 10359870, 10453830, 10476395, 10604528, 10384504, 10379262, 10393559	0.00335982
BP	negative regulation of molecular function	10424400, 10536499, 10418702, 10346562, 10501586, 10445078, 10381006, 10523727, 10571696, 10601360, 10379262, 10485466, 10542310	0.00358894
BP	programmed cell death	10384150, 10458843, 10536294, 10502552, 10349081, 10346562, 10509441, 10449303, 10346564, 10440491, 10564451, 10541895, 10589350, 10571696, 10404506, 10601360, 10544114, 10366052, 10366346, 10437687, 10357043, 10424400, 10360227, 10502565, 10559207, 10539710, 10375667, 10586759, 10545629, 10399360, 10471844, 10453857, 10372745	0.00360796
BP	cell projection morphogenesis	10357043, 10458843, 10576639, 10386789, 10503659, 10553598, 10401382, 10440491, 10380896, 10398267, 10498284, 10377319, 10553833, 10601360, 10436519	0.00394894
BP	cellular ion homeostasis	10447708, 10357043, 10536499, 10354494, 10501586, 10449303, 10406598, 10440491, 10376950, 10362596, 10461844, 10380896, 10523727, 10553833, 10496338, 10379262, 10601360, 10556583	0.00404781
BP	regulation of cell-substrate adhesion	10411782, 10357043, 10403584, 10435948, 10379262, 10502655, 10415052	0.00405122
BP	exocrine system development	10547100, 10576639, 10576696, 10408450, 10365559, 10569344, 10484402	0.00405122
BP	regeneration	10357043, 10577164, 10487011, 10365482, 10363173	0.00414798
BP	cellular component morphogenesis	10458843, 10576639, 10503659, 10401382, 10553598, 10449303, 10440491, 10376950, 10476395, 10380896, 10377319, 10553833, 10601360, 10436519, 10357043, 10386789, 10467139, 10396511, 10422728, 10454786, 10521222, 10398267, 10396485, 10498284, 10396606, 10396608	0.00470801
BP	cell morphogenesis	10357043, 10458843, 10576639, 10503659, 10386789, 10467139, 10553598, 10396511, 10401382, 10422728, 10440491, 10454786, 10476395, 10521222, 10380896, 10398267, 10396485, 10498284, 10377319, 10396606, 10553833, 10601360, 10436519, 10396608	0.00473777
BP	myelination	10447708, 10376950, 10362596, 10380896, 10354494, 10379262, 10406598	0.00483677
BP	cell projection organization	10536297, 10357043, 10495416, 10458843, 10380477, 10576639, 10503659, 10386789, 10553598, 10401382, 10587446, 10440491, 10411519, 10380896, 10398267, 10498284, 10377319, 10472820, 10553833, 10601360, 10436519	0.0050159
BP	cellular chemical homeostasis	10447708, 10357043, 10536499, 10354494, 10501586, 10449303, 10406598, 10440491, 10376950, 10362596, 10461844, 10380896, 10523727, 10553833, 10496338, 10379262, 10601360, 10556583	0.00525603
BP	extracellular structure organization	10380896, 10457644, 10504424, 10403584, 10565794, 10587446, 10435948, 10405587, 10379262, 10601360, 10502655, 10440491	0.00549055
BP	release of cytochrome c from mitochondria	10357043, 10424400, 10571696, 10449303, 10601360	0.0055612
BP	regulation of phosphate metabolic process	10346651, 10357043, 10495416, 10380477, 10418702, 10536499, 10482448, 10449303, 10440491, 10559261, 10514466, 10476395, 10380341, 10589087, 10571696, 10379262, 10601360, 10382284, 10366052, 10569429, 10542310	0.00561268
BP	regulation of phosphorus metabolic process	10346651, 10357043, 10495416, 10380477, 10418702, 10536499, 10482448, 10449303, 10440491, 10559261, 10514466, 10476395, 10380341, 10589087, 10571696, 10379262, 10601360, 10382284, 10366052, 10569429, 10542310	0.00561268
BP	regulation of cell size	10559261, 10357043, 10576639, 10386789, 10542355, 10553598, 10553833, 10607259, 10563441, 10414325, 10440491	0.00577816
BP	apoptosis	10384150, 10458843, 10536294, 10502552, 10349081, 10346562, 10509441, 10449303, 10346564, 10440491, 10564451, 10541895, 10589350, 10571696, 10404506, 10601360, 10544114, 10366346, 10437687, 10357043, 10424400, 10360227, 10502565, 10559207, 10539710, 10375667, 10586759, 10545629, 10399360, 10471844, 10453857, 10372745	0.00584523
BP	wound healing	10408915, 10488378, 10487011, 10398267, 10377319, 10497817, 10371959, 10365482, 10363173, 10379262	0.00590562
BP	negative regulation of transcription	10472965, 10384150, 10431726, 10551570, 10513008, 10482448, 10354494, 10387372, 10423902, 10477325, 10428755, 10564527, 10405400, 10594404, 10381006, 10516706, 10544114, 10410766, 10424400, 10475625, 10456566, 10453678, 10498284, 10428536, 10428534, 10456522, 10569429	0.00614657
BP	growth	10357043, 10386789, 10365559, 10553598, 10563441, 10440491, 10476395, 10594404, 10521222, 10487011, 10542355, 10553833, 10365482, 10363173, 10365290, 10413185	0.00634159
BP	axon ensheathment	10447708, 10376950, 10362596, 10380896, 10354494, 10379262, 10406598	0.00673509
BP	ensheathment of neurons	10447708, 10376950, 10362596, 10380896, 10354494, 10379262, 10406598	0.00673509
BP	negative regulation of cell adhesion	10411782, 10586844, 10379262, 10543791, 10415052	0.00726289
BP	developmental cell growth	10386789, 10553598, 10553833, 10440491	0.00726486
MF	transcription regulator activity	10384150, 10472965, 10435237, 10514054, 10428755, 10564527, 10506050, 10552874, 10514466, 10594404, 10405605, 10381006, 10420823, 10409278, 10381187, 10569972, 10416657, 10410766, 10424400, 10408450, 10446763, 10523670, 10520048, 10498284, 10453857, 10408010, 10456522, 10575160, 10402063, 10529923, 10604393, 10431726, 10560481, 10513008, 10504349, 10482448, 10506031, 10571705, 10354494, 10371959,…	0.00727533
BP	regulation of cellular component size	10607865, 10357043, 10576639, 10386789, 10553598, 10563441, 10440491, 10559261, 10384885, 10398267, 10542355, 10553833, 10607259, 10414325	0.00747637
BP	cell death	10384150, 10458843, 10536294, 10502552, 10349081, 10346562, 10509441, 10449303, 10346564, 10440491, 10564451, 10541895, 10589350, 10571696, 10404506, 10601360, 10544114, 10366052, 10366346, 10437687, 10357043, 10424400, 10360227, 10502565, 10559207, 10539710, 10375667, 10586759, 10545629, 10399360, 10471844, 10453857, 10372745	0.00755635
BP	regulation of nucleotide biosynthetic process	10490203, 10461844, 10484371, 10499811, 10501586, 10445078, 10379262	0.00786365
BP	regulation of cyclic nucleotide biosynthetic process	10490203, 10461844, 10484371, 10499811, 10501586, 10445078, 10379262	0.00786365
BP	cellular homeostasis	10447708, 10357043, 10536499, 10405539, 10354494, 10501586, 10449303, 10406598, 10440491, 10376950, 10362596, 10461844, 10380896, 10521222, 10523727, 10553833, 10496338, 10457183, 10379262, 10419170, 10601360, 10556583	0.00823543
BP	dendrite development	10411519, 10380477, 10576639, 10587446, 10601360, 10440491	0.00832749
BP	positive regulation of pigment cell differentiation	10357043, 10546450, 10546454, 10546434, 10366052	0.00851796
BP	positive regulation of melanocyte differentiation	10357043, 10546450, 10546454, 10546434, 10366052	0.00851796
BP	actin filament organization	10536297, 10357043, 10380477, 10398267, 10581890, 10605437, 10476021, 10409464	0.0088875
MF	GTPase regulator activity	10370510, 10531610, 10422028, 10375679, 10455259, 10537834, 10380773, 10358389, 10372891, 10537849, 10379262, 10417095, 10495685, 10400718, 10356020, 10495416, 10574204, 10395466, 10605884, 10439138, 10427928, 10561431, 10566846, 10362294, 10393544, 10476759	0.00898699
BP	regulation of ossification	10359870, 10490203, 10357043, 10476395, 10594404, 10405605, 10523468	0.00912221
BP	regulation of action potential in neuron	10447708, 10376950, 10362596, 10380896, 10354494, 10379262, 10406598	0.00912221
BP	embryonic development ending in birth or egg hatching	10503196, 10490203, 10503172, 10503174, 10503176, 10482448, 10509441, 10503208, 10423902, 10346564, 10359870, 10594404, 10464084, 10377319, 10381187, 10586844, 10379262, 10503161, 10503186, 10503184, 10503182, 10503168, 10607089, 10360806, 10422728, 10503188, 10446376, 10453830, 10521222, 10503222, 10453678, 10459089, 10523727, 10582712, 10453857, 10363173, 10365290, 10502655, 10413185, 10492310	0.00926691
BP	enzyme linked receptor protein signaling pathway	10346651, 10514668, 10576639, 10576696, 10503659, 10365559, 10581890, 10453604, 10498383, 10384398, 10498379, 10411782, 10476395, 10384885, 10594404, 10380896, 10405605, 10459089, 10553833, 10391301, 10544114	0.00945833
BP	regulation of growth	10503196, 10503172, 10479411, 10503174, 10576639, 10503176, 10381096, 10372796, 10503208, 10440491, 10408850, 10553833, 10414325, 10503161, 10503186, 10357043, 10503184, 10577164, 10386789, 10503182, 10503168, 10503188, 10545629, 10559261, 10503222, 10391301, 10370766, 10502655, 10607259	0.00959808
BP	negative regulation of nitrogen compound metabolic process	10472965, 10384150, 10431726, 10551570, 10513008, 10482448, 10354494, 10387372, 10423902, 10477325, 10428755, 10564527, 10405400, 10594404, 10381006, 10516706, 10544114, 10410766, 10424400, 10536499, 10475625, 10456566, 10453678, 10498284, 10428536, 10428534, 10456522, 10569429	0.00973868
BP	death	10384150, 10458843, 10536294, 10502552, 10349081, 10346562, 10509441, 10449303, 10346564, 10440491, 10564451, 10541895, 10589350, 10571696, 10404506, 10601360, 10544114, 10366052, 10366346, 10437687, 10357043, 10424400, 10360227, 10502565, 10559207, 10539710, 10375667, 10586759, 10545629, 10399360, 10471844, 10453857, 10372745	0.0102066
BP	regulation of pigmentation during development	10357043, 10461844, 10546450, 10546454, 10546434, 10366052	0.0104624
MF	calmodulin binding	10368675, 10603708, 10384885, 10521222, 10377319, 10587446, 10496338, 10537184, 10495896, 10400191	0.0111021
BP	extracellular matrix organization	10504424, 10403584, 10565794, 10435948, 10405587, 10379262, 10601360, 10502655, 10440491	0.0112779
BP	ion homeostasis	10447708, 10357043, 10536499, 10354494, 10501586, 10449303, 10406598, 10440491, 10376950, 10362596, 10461844, 10380896, 10523727, 10553833, 10496338, 10379262, 10601360, 10556583	0.0113487
MF	nucleoside-triphosphatase regulator activity	10370510, 10531610, 10422028, 10375679, 10455259, 10537834, 10380773, 10358389, 10372891, 10537849, 10379262, 10417095, 10495685, 10400718, 10356020, 10495416, 10574204, 10395466, 10605884, 10439138, 10427928, 10561431, 10566846, 10362294, 10393544, 10476759	0.0116897
BP	regulation of protein modification process	10346651, 10357043, 10427420, 10380477, 10536499, 10482448, 10449303, 10514466, 10559261, 10476395, 10589087, 10382284, 10366052	0.0120595
BP	regulation of cell growth	10559261, 10357043, 10576639, 10386789, 10381096, 10553833, 10502655, 10607259, 10414325	0.0124819
BP	negative regulation of cellular biosynthetic process	10472965, 10384150, 10431726, 10551570, 10513008, 10482448, 10354494, 10387372, 10423902, 10477325, 10428755, 10564527, 10405400, 10594404, 10381006, 10516706, 10544114, 10410766, 10424400, 10536499, 10539710, 10475625, 10456566, 10453678, 10498284, 10428536, 10428534, 10456522, 10569429	0.0130747
MF	transcription activator activity	10357043, 10410766, 10604393, 10431726, 10408450, 10446763, 10506031, 10594879, 10514054, 10506050, 10552874, 10564451, 10399725, 10594404, 10523670, 10381006, 10520048, 10498284, 10381187, 10453857, 10391301	0.0134348
BP	regulation of cell proliferation	10513008, 10388430, 10365559, 10548105, 10514054, 10549162, 10359870, 10477808, 10514466, 10476395, 10380896, 10594404, 10571696, 10544114, 10379262, 10569335, 10366052, 10393559, 10357043, 10484371, 10424400, 10536499, 10501586, 10454786, 10559261, 10456566, 10569341, 10453678, 10365290, 10413185, 10542310	0.0136579
BP	negative regulation of biosynthetic process	10472965, 10384150, 10431726, 10551570, 10513008, 10482448, 10354494, 10387372, 10423902, 10477325, 10428755, 10564527, 10405400, 10594404, 10381006, 10516706, 10544114, 10410766, 10424400, 10536499, 10539710, 10475625, 10456566, 10453678, 10498284, 10428536, 10428534, 10456522, 10569429	0.0141242
BP	regulation of cell-matrix adhesion	10411782, 10357043, 10379262, 10415052	0.0143514
BP	chordate embryonic development	10503196, 10490203, 10503172, 10503174, 10503176, 10482448, 10509441, 10503208, 10423902, 10346564, 10359870, 10594404, 10464084, 10377319, 10381187, 10586844, 10379262, 10503161, 10503186, 10503184, 10503182, 10503168, 10360806, 10422728, 10503188, 10446376, 10453830, 10521222, 10503222, 10453678, 10459089, 10582712, 10523727, 10453857, 10363173, 10365290, 10502655, 10413185, 10492310	0.0146563
BP	negative regulation of nucleobase, nucleoside, nucleotide and nucleic acid metabolic process	10472965, 10384150, 10431726, 10551570, 10513008, 10482448, 10354494, 10387372, 10423902, 10477325, 10428755, 10564527, 10405400, 10594404, 10381006, 10516706, 10544114, 10410766, 10424400, 10475625, 10456566, 10453678, 10498284, 10428536, 10428534, 10456522, 10569429	0.015636
BP	negative regulation of macromolecule biosynthetic process	10472965, 10384150, 10431726, 10551570, 10513008, 10482448, 10354494, 10387372, 10423902, 10477325, 10428755, 10564527, 10405400, 10594404, 10381006, 10516706, 10544114, 10410766, 10424400, 10539710, 10475625, 10456566, 10453678, 10498284, 10428536, 10428534, 10456522, 10569429	0.0157287
BP	regulation of cyclase activity	10490203, 10461844, 10484371, 10501586, 10445078, 10379262	0.0161165
BP	regulation of lyase activity	10490203, 10461844, 10484371, 10501586, 10445078, 10379262	0.0161165
BP	regulation of adenylate cyclase activity	10490203, 10461844, 10484371, 10501586, 10445078, 10379262	0.0161165
BP	negative regulation of transcription, DNA-dependent	10384150, 10472965, 10410766, 10551570, 10513008, 10424400, 10387372, 10423902, 10428755, 10477325, 10475625, 10564527, 10405400, 10594404, 10456566, 10453678, 10498284, 10428536, 10428534, 10456522, 10544114, 10569429	0.0161409
BP	glomerulus development	10357043, 10498284, 10403584	0.0164245
BP	positive regulation of pigmentation during development	10357043, 10546450, 10546454, 10546434, 10366052	0.0164245
MF	profilin binding	10398267, 10553598, 10409464	0.0165809
BP	regulation of neuron differentiation	10359870, 10357043, 10453830, 10384504, 10576639, 10386789, 10437080, 10431424, 10393559	0.0166591
MF	protein kinase binding	10368675, 10564451, 10576696, 10380341, 10360227, 10499811, 10586844, 10548105, 10391301	0.0171034
BP	tissue morphogenesis	10346651, 10547100, 10357043, 10576639, 10513008, 10482448, 10365559, 10484402, 10346564, 10359870, 10476395, 10453830, 10557960, 10594404, 10582712, 10601360, 10382284	0.0171713
MF	kinase binding	10368675, 10564451, 10576696, 10380341, 10360227, 10536499, 10499811, 10586844, 10548105, 10391301	0.0172348
BP	cell recognition	10453747, 10576639, 10476021, 10553833, 10440491	0.0173667
BP	neuron migration	10362596, 10410766, 10390117, 10377319, 10553833, 10363173, 10564527	0.0176248
BP	negative regulation of RNA metabolic process	10384150, 10472965, 10410766, 10551570, 10513008, 10424400, 10387372, 10423902, 10428755, 10477325, 10475625, 10564527, 10405400, 10594404, 10456566, 10453678, 10498284, 10428536, 10428534, 10456522, 10544114, 10569429	0.017657
BP	striated muscle tissue development	10380896, 10536499, 10377319, 10582712, 10496338, 10453857, 10379262, 10423902, 10564527, 10492310, 10440491	0.0176575
BP	cellular aldehyde metabolic process	10355214, 10547830, 10564857, 10515352	0.0189502
BP	epithelium development	10547100, 10357043, 10576639, 10482448, 10365559, 10501586, 10484402, 10346564, 10359870, 10514466, 10476395, 10453830, 10557960, 10594404, 10380219, 10571696, 10453857, 10363173	0.0200191
BP	chemical homeostasis	10447708, 10357043, 10536499, 10365559, 10354494, 10501586, 10449303, 10406598, 10440491, 10376950, 10362596, 10461844, 10380896, 10523727, 10553833, 10391301, 10496338, 10379262, 10601360, 10556583	0.0205142
BP	regulation of cAMP biosynthetic process	10490203, 10461844, 10484371, 10501586, 10445078, 10379262	0.0213887
BP	cellular calcium ion homeostasis	10357043, 10536499, 10523727, 10501586, 10553833, 10449303, 10556583, 10440491	0.0214261
BP	response to organic substance	10473847, 10357043, 10344966, 10424400, 10576696, 10437080, 10536499, 10497817, 10581890, 10477986, 10444658, 10362596, 10478048, 10411782, 10487011, 10488378, 10496438, 10365482, 10391301, 10475414, 10502655, 10397346, 10415052	0.0216298
BP	muscle organ development	10408915, 10536499, 10423902, 10440491, 10564527, 10380896, 10431585, 10377319, 10582712, 10496338, 10453857, 10379262, 10492310	0.0218566
MF	Rho guanyl-nucleotide exchange factor activity	10400718, 10495416, 10356020, 10537849, 10537834, 10439138, 10427928, 10561431, 10417095	0.0219378
MF	calcium ion binding	10375679, 10453747, 10549282, 10535231, 10531931, 10381122, 10457644, 10488378, 10605493, 10572747, 10403584, 10472820, 10421361, 10395103, 10455148, 10493995, 10545958, 10538547, 10561842, 10577164, 10521972, 10542965, 10483865, 10497817, 10605437, 10360806, 10453636, 10580033, 10369154, 10491732, 10519504, 10523727, 10391301, 10556583, 10415052	0.0221187
MF	SH3 domain binding	10447708, 10398267, 10395466, 10418702, 10601449, 10581890, 10476021, 10586844, 10516706	0.022327
BP	negative regulation of gene expression	10472965, 10384150, 10431726, 10551570, 10513008, 10482448, 10354494, 10387372, 10423902, 10477325, 10428755, 10564527, 10405400, 10594404, 10381006, 10516706, 10544114, 10410766, 10424400, 10475625, 10456566, 10453678, 10498284, 10428536, 10428534, 10456522, 10569429	0.0227675
BP	axon guidance	10458843, 10380896, 10576639, 10398267, 10503659, 10377319, 10436519, 10440491	0.0235752
BP	homeostatic process	10447708, 10427420, 10600857, 10365559, 10405539, 10354494, 10449303, 10440491, 10376950, 10380896, 10405605, 10457183, 10553833, 10571696, 10601360, 10379262, 10357043, 10536499, 10467139, 10501586, 10406598, 10362596, 10461844, 10521222, 10520048, 10523727, 10496338, 10391301, 10419170, 10556583	0.0239072
BP	apoptotic mitochondrial changes	10357043, 10424400, 10571696, 10449303, 10601360	0.0246214
BP	skeletal muscle organ development	10380896, 10536499, 10496338, 10379262, 10564527, 10492310, 10440491	0.0247379
BP	skeletal muscle tissue development	10380896, 10536499, 10496338, 10379262, 10564527, 10492310, 10440491	0.0247379
BP	tube development	10346651, 10547100, 10357043, 10576639, 10482448, 10365559, 10467139, 10423902, 10514054, 10346564, 10359870, 10446376, 10476395, 10453830, 10594404, 10453857, 10363173, 10601360, 10415052	0.0260498
BP	negative regulation of cell-matrix adhesion	10411782, 10379262, 10415052	0.0263961
BP	positive regulation of Wnt receptor signaling pathway	10408450, 10456566, 10482448	0.0263961
MF	cyclin-dependent protein kinase inhibitor activity	10571696, 10569429, 10542310	0.0266429
MF	RPTP-like protein binding	10457644, 10391103, 10484402	0.0266429
BP	response to oxidative stress	10477808, 10357043, 10487011, 10355214, 10412207, 10601360, 10485466, 10415052, 10395103	0.0278788
MF	double-stranded DNA binding	10384150, 10594404, 10424400, 10453678, 10514054, 10397346	0.0281864
BP	regulation of Ras protein signal transduction	10370510, 10400718, 10495416, 10375679, 10422028, 10537834, 10439138, 10427928, 10501586, 10561431, 10537849, 10393544, 10379262, 10417095, 10366052	0.0282645
BP	behavior	10503196, 10503172, 10503174, 10503176, 10504349, 10587446, 10503208, 10440491, 10574471, 10478048, 10379262, 10601360, 10544114, 10436519, 10503161, 10357043, 10503186, 10503184, 10503182, 10503168, 10559207, 10503188, 10545629, 10461844, 10503222, 10456566, 10390117, 10496438, 10391301, 10502655	0.0284036
BP	negative regulation of cell proliferation	10357043, 10513008, 10388430, 10536499, 10514054, 10454786, 10514466, 10476395, 10380896, 10453678, 10569341, 10571696, 10379262, 10569335, 10393559, 10542310	0.0284661
BP	response to extracellular stimulus	10357043, 10537062, 10513008, 10487011, 10496438, 10520048, 10472820, 10553301, 10397346, 10444658	0.0287554
BP	cytoskeleton-dependent intracellular transport	10457273, 10398267, 10377319, 10518585, 10440491	0.0288391
BP	muscle tissue development	10380896, 10536499, 10377319, 10582712, 10496338, 10453857, 10379262, 10423902, 10564527, 10492310, 10440491	0.0288685
BP	negative regulation of cellular component organization	10411519, 10607865, 10384885, 10576639, 10398267, 10386789, 10437080, 10501586, 10415052	0.0301586
BP	calcium ion homeostasis	10357043, 10536499, 10523727, 10501586, 10553833, 10449303, 10556583, 10440491	0.0309019
BP	protein amino acid phosphorylation	10357579, 10603708, 10593856, 10483381, 10576696, 10503659, 10499811, 10441565, 10495896, 10440491, 10388682, 10411782, 10384885, 10380896, 10586844, 10404506, 10544114, 10346651, 10357043, 10514668, 10386789, 10411804, 10439138, 10427928, 10435676, 10498383, 10523468, 10350742, 10362596, 10559261, 10498379, 10471844, 10380341, 10453026, 10382284, 10372745	0.0312183
BP	negative regulation of macromolecule metabolic process	10472965, 10384150, 10431726, 10551570, 10513008, 10482448, 10354494, 10449303, 10387372, 10423902, 10477325, 10428755, 10564527, 10514466, 10405400, 10594404, 10381006, 10516706, 10544114, 10410766, 10424400, 10536499, 10539710, 10475625, 10456566, 10453678, 10498284, 10428536, 10428534, 10456522, 10569429	0.0328241
BP	glycoprotein biosynthetic process	10434291, 10446376, 10474860, 10365559, 10365290, 10539080, 10440099, 10601360, 10366346, 10549162	0.0330753
BP	cellular metal ion homeostasis	10357043, 10536499, 10523727, 10501586, 10553833, 10449303, 10556583, 10440491	0.0336493
BP	membrane organization	10495416, 10357043, 10453747, 10454580, 10523206, 10536499, 10605884, 10396511, 10587446, 10449303, 10530633, 10422728, 10440491, 10478048, 10396485, 10390117, 10377319, 10396606, 10476021, 10476759, 10396608	0.034486
BP	negative regulation of catalytic activity	10418702, 10536499, 10346562, 10571696, 10501586, 10445078, 10379262, 10601360, 10542310	0.0350958
BP	actin cytoskeleton organization	10536297, 10357043, 10607865, 10380477, 10605884, 10581890, 10605437, 10398267, 10377319, 10476021, 10472097, 10379262, 10409464	0.0365875
BP	response to nutrient	10357043, 10537062, 10513008, 10487011, 10496438, 10520048, 10444658	0.0368845
MF	extracellular matrix binding	10403584, 10472820, 10405587, 10502655	0.0375173
BP	chondroitin sulfate proteoglycan biosynthetic process	10474860, 10365559, 10365290	0.0381863
BP	endoplasmic reticulum calcium ion homeostasis	10357043, 10449303, 10440491	0.0381863
BP	adult heart development	10503161, 10503196, 10503186, 10503172, 10503184, 10503174, 10503182, 10503176, 10503168, 10503208, 10503188, 10503222, 10377319, 10363173	0.0381863
BP	axon extension	10386789, 10553598, 10553833	0.0381863
BP	neuron recognition	10576639, 10553833, 10440491	0.0381863
BP	negative regulation of cell-substrate adhesion	10411782, 10379262, 10415052	0.0381863
MF	Ras guanyl-nucleotide exchange factor activity	10400718, 10495416, 10356020, 10537849, 10537834, 10439138, 10427928, 10561431, 10417095	0.0438012
BP	regulation of transforming growth factor beta receptor signaling pathway	10594404, 10453678, 10458046, 10365290, 10544114	0.0439198
BP	cartilage development	10490203, 10476395, 10453678, 10381006, 10421361, 10365290, 10601360	0.0441737
BP	cellular response to reactive oxygen species	10477808, 10601360, 10485466, 10395103	0.0444977
MF	protein kinase inhibitor activity	10418702, 10571696, 10569429, 10542310	0.0450496
BP	metal ion homeostasis	10357043, 10536499, 10523727, 10501586, 10553833, 10449303, 10556583, 10440491	0.0462454
BP	regulation of Rho protein signal transduction	10400718, 10370510, 10495416, 10537849, 10537834, 10439138, 10427928, 10561431, 10417095	0.0462454
MF	endopeptidase activity	10561842, 10536294, 10546450, 10546454, 10346562, 10509441, 10546434, 10587733, 10360806, 10346564, 10545629, 10586844, 10421361, 10410124, 10571696, 10440522, 10415844, 10415052	0.0464338
MF	transcription repressor activity	10384150, 10416657, 10431726, 10513008, 10482448, 10354494, 10423902, 10475625, 10405400, 10498284, 10381006, 10516706, 10428536, 10456522, 10544114, 10428534	0.0495893
BP	actin filament-based process	10536297, 10357043, 10607865, 10380477, 10605884, 10581890, 10605437, 10398267, 10377319, 10476021, 10472097, 10379262, 10409464	0.0496578
BP	sensory organ development	10503161, 10503196, 10357043, 10503186, 10503172, 10503184, 10513008, 10503174, 10424400, 10503182, 10503176, 10503168, 10587446, 10449303, 10503208, 10503188, 10384504, 10594404, 10503222, 10453678, 10377319, 10391301, 10379262, 10542310	0.0496578
BP	transmembrane receptor protein tyrosine kinase signaling pathway	10346651, 10576639, 10503659, 10576696, 10581890, 10365559, 10498383, 10384398, 10411782, 10498379, 10380896, 10459089, 10553833, 10391301	0.0496578
BP	positive regulation of protein amino acid phosphorylation	10346651, 10559261, 10357043, 10476395, 10366052	0.0497617
BP	transmission of nerve impulse	10447708, 10376950, 10362596, 10380896, 10354494, 10587446, 10496338, 10501586, 10518585, 10379262, 10406598, 10440491	0.0499573
E12.5 ♂+♀ germ cell enriched
Category	Term	Transcript cluster IDs	p-value
BP	DNA metabolic process	10574996, 10397719, 10508151, 10391461, 10546163, 10562818, 10425632, 10355711, 10524169, 10482467, 10582501, 10396030, 10388409, 10476989, 10352048, 10367076, 10410947, 10578557, 10585625, 10474902, 10543471, 10528077, 10386844, 10586184, 10411646, 10540738, 10500445, 10447417, 10367122, 10463951, 10359801, 10480224, 10543114, 10470665, 10479010, 10531776, 10411690, 10410560, 10593526, 10562563,…	2.88959e-17
MF	nucleoside binding	10535904, 10520304, 10352767, 10424349, 10581737, 10553788, 10396030, 10380025, 10519354, 10484457, 10491704, 10504470, 10463211, 10399882, 10402630, 10556266, 10526069, 10467230, 10474902, 10363894, 10500630, 10470628, 10500445, 10491780, 10437311, 10461909, 10463951, 10479010, 10411690, 10593526, 10410560, 10380840, 10587508, 10350823, 10491014, 10587892, 10428052, 10469613, 10404941, 10396610,…	2.11511e-15
MF	adenyl nucleotide binding	10535904, 10520304, 10352767, 10424349, 10581737, 10553788, 10396030, 10380025, 10519354, 10484457, 10491704, 10504470, 10463211, 10399882, 10402630, 10556266, 10526069, 10467230, 10474902, 10363894, 10500630, 10470628, 10500445, 10491780, 10437311, 10461909, 10463951, 10479010, 10411690, 10593526, 10410560, 10380840, 10587508, 10350823, 10491014, 10587892, 10428052, 10469613, 10404941, 10396610,…	4.19021e-15
BP	cell cycle phase	10352767, 10591556, 10525591, 10361669, 10582501, 10459755, 10388409, 10568968, 10573172, 10352048, 10541729, 10556266, 10585625, 10591781, 10474902, 10528077, 10586184, 10427166, 10540738, 10420426, 10577492, 10445531, 10504957, 10499366, 10463951, 10359801, 10479010, 10410560, 10368199, 10479765, 10344939, 10421526, 10500754, 10419465, 10360985, 10459844, 10451805, 10605674, 10400589, 10385842,…	5.36506e-15
MF	purine nucleoside binding	10535904, 10520304, 10352767, 10424349, 10581737, 10553788, 10396030, 10380025, 10519354, 10484457, 10491704, 10504470, 10463211, 10399882, 10402630, 10556266, 10526069, 10467230, 10474902, 10363894, 10500630, 10470628, 10500445, 10491780, 10437311, 10461909, 10463951, 10479010, 10411690, 10593526, 10410560, 10380840, 10587508, 10350823, 10491014, 10587892, 10428052, 10469613, 10404941, 10396610,…	7.87254e-15
MF	ATP binding	10535904, 10520304, 10352767, 10581737, 10553788, 10396030, 10380025, 10519354, 10484457, 10491704, 10504470, 10463211, 10402630, 10526069, 10556266, 10467230, 10474902, 10363894, 10500630, 10470628, 10500445, 10491780, 10437311, 10461909, 10463951, 10479010, 10411690, 10593526, 10410560, 10380840, 10587508, 10350823, 10491014, 10587892, 10428052, 10469613, 10385842, 10396610, 10373157, 10564978,…	1.10602e-14
BP	M phase	10352767, 10591556, 10525591, 10361669, 10582501, 10459755, 10388409, 10568968, 10573172, 10352048, 10541729, 10556266, 10591781, 10474902, 10586184, 10427166, 10540738, 10420426, 10577492, 10445531, 10504957, 10499366, 10463951, 10359801, 10479010, 10410560, 10479765, 10344939, 10500754, 10419465, 10360985, 10459844, 10451805, 10400589, 10385842, 10448506, 10594426, 10411728, 10462973, 10509820,…	1.42035e-14
MF	adenyl ribonucleotide binding	10535904, 10520304, 10352767, 10581737, 10553788, 10396030, 10380025, 10519354, 10484457, 10491704, 10504470, 10463211, 10402630, 10526069, 10556266, 10467230, 10474902, 10363894, 10500630, 10470628, 10500445, 10491780, 10437311, 10461909, 10463951, 10479010, 10411690, 10593526, 10410560, 10380840, 10587508, 10350823, 10491014, 10587892, 10428052, 10469613, 10385842, 10396610, 10373157, 10564978,…	2.08592e-14
BP	cell cycle process	10352767, 10591556, 10391461, 10525591, 10361669, 10582501, 10459755, 10388409, 10573172, 10568968, 10352048, 10541729, 10556266, 10585625, 10591781, 10474902, 10528077, 10586184, 10427166, 10540738, 10420426, 10577492, 10445531, 10504957, 10499366, 10463951, 10359801, 10479010, 10410560, 10368199, 10479765, 10344939, 10421526, 10500754, 10419465, 10360985, 10459844, 10451805, 10605674, 10400589,…	4.059e-13
MF	nucleotide binding	10535904, 10520304, 10352767, 10406581, 10424349, 10461354, 10383671, 10581737, 10524169, 10553788, 10396030, 10380025, 10519354, 10484457, 10491704, 10504470, 10463211, 10369738, 10399882, 10494452, 10402630, 10556266, 10526069, 10467230, 10474902, 10363894, 10500630, 10514352, 10470628, 10500445, 10362581, 10491780, 10568217, 10437311, 10461909, 10463951, 10479010, 10411690, 10593526, 10410560,…	6.41322e-13
BP	cell cycle	10352767, 10591556, 10508151, 10391461, 10546163, 10525591, 10361669, 10582501, 10459755, 10388409, 10472058, 10524266, 10573172, 10568968, 10352048, 10541729, 10556266, 10577508, 10585625, 10591781, 10474902, 10528077, 10427166, 10586184, 10512680, 10540738, 10420426, 10577492, 10445909, 10504957, 10445531, 10499366, 10463951, 10359801, 10479010, 10411690, 10410560, 10593526, 10368199, 10562563,…	3.66228e-12
MF	purine nucleotide binding	10535904, 10520304, 10352767, 10424349, 10383671, 10581737, 10553788, 10396030, 10380025, 10519354, 10484457, 10491704, 10504470, 10463211, 10399882, 10402630, 10556266, 10526069, 10467230, 10474902, 10363894, 10500630, 10470628, 10500445, 10362581, 10491780, 10437311, 10461909, 10463951, 10479010, 10411690, 10593526, 10410560, 10380840, 10587508, 10350823, 10491014, 10587892, 10428052, 10404941,…	3.80814e-12
MF	ribonucleotide binding	10535904, 10520304, 10352767, 10383671, 10581737, 10553788, 10396030, 10380025, 10519354, 10484457, 10491704, 10504470, 10463211, 10402630, 10556266, 10526069, 10467230, 10474902, 10363894, 10500630, 10470628, 10500445, 10362581, 10491780, 10437311, 10461909, 10463951, 10479010, 10411690, 10593526, 10410560, 10380840, 10587508, 10350823, 10491014, 10587892, 10428052, 10469613, 10385842, 10396610,…	1.7887e-11
MF	purine ribonucleotide binding	10535904, 10520304, 10352767, 10383671, 10581737, 10553788, 10396030, 10380025, 10519354, 10484457, 10491704, 10504470, 10463211, 10402630, 10556266, 10526069, 10467230, 10474902, 10363894, 10500630, 10470628, 10500445, 10362581, 10491780, 10437311, 10461909, 10463951, 10479010, 10411690, 10593526, 10410560, 10380840, 10587508, 10350823, 10491014, 10587892, 10428052, 10469613, 10385842, 10396610,…	1.7887e-11
BP	ncRNA metabolic process	10517159, 10400975, 10375880, 10481368, 10352735, 10393955, 10502146, 10462670, 10359386, 10551173, 10355931, 10484457, 10399882, 10491551, 10439532, 10373157, 10500582, 10376959, 10488748, 10600485, 10447521, 10529425, 10395807, 10464171, 10487969, 10462346, 10500218, 10590549, 10421325, 10507557, 10480224, 10359801, 10423842, 10573434, 10454606, 10357454, 10511207, 10423185, 10439985, 10599498,…	3.77044e-10
BP	meiosis	10391339, 10427166, 10389627, 10352767, 10500754, 10464171, 10540738, 10527268, 10419465, 10445531, 10421325, 10582501, 10463951, 10388409, 10573172, 10568968, 10352048, 10451805, 10359801, 10479010, 10385842, 10410560, 10474902, 10479765	1.25478e-09
BP	M phase of meiotic cell cycle	10391339, 10427166, 10389627, 10352767, 10500754, 10464171, 10540738, 10527268, 10419465, 10445531, 10421325, 10582501, 10463951, 10388409, 10573172, 10568968, 10352048, 10451805, 10359801, 10479010, 10385842, 10410560, 10474902, 10479765	1.25478e-09
BP	meiotic cell cycle	10391339, 10427166, 10389627, 10352767, 10500754, 10464171, 10540738, 10527268, 10419465, 10445531, 10421325, 10582501, 10463951, 10388409, 10573172, 10568968, 10352048, 10451805, 10359801, 10479010, 10385842, 10410560, 10474902, 10479765	2.23542e-09
BP	DNA repair	10354542, 10397719, 10508151, 10587892, 10391461, 10425632, 10562818, 10355711, 10352242, 10524169, 10582501, 10396030, 10388409, 10352048, 10605674, 10385842, 10410947, 10564978, 10474902, 10386844, 10355329, 10433797, 10411646, 10546834, 10540738, 10423068, 10500445, 10527268, 10420877, 10447417, 10442542, 10396849, 10463951, 10531776, 10470665, 10593526, 10411690, 10410560, 10554281, 10515257	5.57544e-09
BP	ribonucleoprotein complex biogenesis	10574996, 10375880, 10468519, 10492598, 10502146, 10451580, 10551173, 10433672, 10484457, 10444595, 10447097, 10491551, 10500582, 10600485, 10531383, 10496715, 10529425, 10447521, 10436428, 10462346, 10590549, 10547251, 10507557, 10423842, 10454606, 10406881, 10423185, 10427718, 10599498	2.28721e-08
BP	response to DNA damage stimulus	10354542, 10397719, 10413853, 10508151, 10587892, 10391461, 10562818, 10425632, 10355711, 10524169, 10352242, 10582501, 10396030, 10472058, 10388409, 10524266, 10352048, 10605674, 10385842, 10410947, 10564978, 10474902, 10386844, 10355329, 10586184, 10433797, 10411646, 10546834, 10540738, 10423068, 10500445, 10527268, 10420877, 10447417, 10442542, 10396849, 10463951, 10531776, 10428238, 10470665,…	3.47823e-08
BP	RNA processing	10574996, 10517159, 10400975, 10573217, 10468519, 10492757, 10494910, 10523365, 10447097, 10484457, 10581674, 10399882, 10491551, 10494452, 10439532, 10500582, 10391768, 10376959, 10447521, 10529425, 10500960, 10500630, 10462346, 10590549, 10505282, 10480224, 10500253, 10511207, 10423185, 10599498, 10439985, 10375880, 10449471, 10481368, 10352735, 10393955, 10462670, 10502146, 10551971, 10529299,…	4.77865e-08
BP	M phase of mitotic cell cycle	10344939, 10352767, 10591556, 10525591, 10361669, 10360985, 10459844, 10459755, 10451805, 10541729, 10400589, 10448506, 10594426, 10411728, 10462973, 10556266, 10591781, 10509820, 10583952, 10494281, 10586184, 10517060, 10465861, 10462796, 10420426, 10474381, 10486255, 10487480, 10577492, 10504957, 10499366, 10463951, 10413640, 10516894, 10489078, 10399087	4.87691e-08
BP	mitotic cell cycle	10344939, 10352767, 10421526, 10591556, 10525591, 10361669, 10360985, 10459844, 10459755, 10451805, 10605674, 10541729, 10400589, 10448506, 10594426, 10411728, 10585625, 10462973, 10556266, 10591781, 10509820, 10528077, 10583952, 10494281, 10586184, 10517060, 10465861, 10462796, 10420426, 10474381, 10486255, 10487480, 10577492, 10504957, 10499366, 10463951, 10413640, 10516894, 10368199, 10489078,…	7.20775e-08
BP	nuclear division	10344939, 10352767, 10591556, 10525591, 10361669, 10459844, 10459755, 10451805, 10541729, 10400589, 10448506, 10594426, 10411728, 10462973, 10556266, 10591781, 10509820, 10583952, 10494281, 10586184, 10517060, 10465861, 10462796, 10420426, 10474381, 10486255, 10487480, 10577492, 10504957, 10499366, 10463951, 10413640, 10516894, 10489078, 10399087	1.03912e-07
BP	mitosis	10344939, 10352767, 10591556, 10525591, 10361669, 10459844, 10459755, 10451805, 10541729, 10400589, 10448506, 10594426, 10411728, 10462973, 10556266, 10591781, 10509820, 10583952, 10494281, 10586184, 10517060, 10465861, 10462796, 10420426, 10474381, 10486255, 10487480, 10577492, 10504957, 10499366, 10463951, 10413640, 10516894, 10489078, 10399087	1.03912e-07
BP	organelle fission	10344939, 10352767, 10591556, 10525591, 10361669, 10459844, 10459755, 10451805, 10541729, 10400589, 10448506, 10594426, 10411728, 10462973, 10556266, 10591781, 10509820, 10583952, 10494281, 10586184, 10517060, 10465861, 10462796, 10420426, 10474381, 10486255, 10487480, 10577492, 10504957, 10499366, 10463951, 10413640, 10516894, 10489078, 10399087	2.09613e-07
MF	helicase activity	10534974, 10491014, 10532072, 10573217, 10425632, 10581737, 10412155, 10396030, 10592140, 10357391, 10426118, 10564978, 10462973, 10357292, 10500630, 10500960, 10372766, 10470628, 10500445, 10462752, 10549057, 10538755, 10512067, 10470665, 10352558, 10412177, 10515257	2.40315e-07
BP	DNA-dependent DNA replication	10433278, 10534974, 10438378, 10586184, 10372766, 10546163, 10562818, 10572906, 10605674, 10367076, 10578557, 10433910, 10562563, 10474902	2.91786e-07
BP	cell division	10402650, 10344939, 10438378, 10352767, 10421526, 10500754, 10591556, 10525591, 10361669, 10459844, 10459755, 10568968, 10451805, 10541729, 10400589, 10448506, 10594426, 10541524, 10411728, 10399254, 10462973, 10556266, 10591781, 10509820, 10583952, 10586184, 10517060, 10465861, 10462796, 10420426, 10486255, 10487480, 10577492, 10504957, 10499366, 10572906, 10523802, 10463951, 10413640, 10516894,…	3.08051e-07
BP	DNA replication	10402650, 10344939, 10534974, 10438378, 10546163, 10391461, 10562818, 10524169, 10482467, 10388409, 10476989, 10605674, 10367076, 10578557, 10585625, 10433910, 10564978, 10474902, 10543471, 10528077, 10433278, 10586184, 10372766, 10354845, 10438690, 10572906, 10543114, 10562563, 10353032	3.6834e-07
BP	ncRNA processing	10517159, 10400975, 10375880, 10481368, 10352735, 10393955, 10502146, 10462670, 10551173, 10484457, 10399882, 10491551, 10439532, 10500582, 10376959, 10488748, 10600485, 10529425, 10447521, 10395807, 10487969, 10462346, 10590549, 10507557, 10480224, 10423842, 10454606, 10511207, 10439985, 10599498	4.39726e-07
BP	ribosome biogenesis	10375880, 10529425, 10447521, 10492598, 10462346, 10436428, 10590549, 10547251, 10502146, 10451580, 10507557, 10423842, 10551173, 10433672, 10454606, 10491551, 10423185, 10500582, 10599498, 10427718, 10600485, 10531383, 10496715	1.55379e-06
MF	RNA binding	10517159, 10348521, 10468519, 10461354, 10391461, 10542034, 10580131, 10531133, 10591357, 10595159, 10523365, 10482181, 10382935, 10491551, 10494452, 10451721, 10426827, 10529425, 10514352, 10582823, 10389701, 10590549, 10464819, 10453399, 10458391, 10367122, 10480224, 10512067, 10546104, 10423185, 10375880, 10415377, 10345077, 10481368, 10502146, 10551971, 10437778, 10529299, 10471550, 10592140,…	2.36518e-06
BP	cellular response to stress	10413853, 10397719, 10508151, 10391461, 10425632, 10562818, 10355711, 10524169, 10362922, 10582501, 10388409, 10472058, 10396030, 10524266, 10352048, 10410947, 10369738, 10474902, 10386844, 10586184, 10411646, 10540738, 10500445, 10447417, 10463951, 10531776, 10470665, 10593526, 10410560, 10411690, 10515257, 10354542, 10587892, 10352242, 10605674, 10485048, 10385842, 10396795, 10564978, 10355329,…	4.89895e-06
BP	chromosome segregation	10389627, 10427166, 10449471, 10352767, 10465861, 10420426, 10474381, 10360985, 10499366, 10507557, 10459755, 10451805, 10411728, 10433910, 10399254, 10489078, 10583952	5.43297e-06
BP	DNA recombination	10391339, 10389627, 10433797, 10527268, 10425632, 10447417, 10396849, 10388409, 10549057, 10352048, 10479010, 10410560, 10410947, 10564978, 10474902, 10515257, 10386844	5.43297e-06
BP	regulation of gene expression, epigenetic	10574996, 10517159, 10464171, 10391461, 10452701, 10421325, 10367122, 10404941, 10409557, 10359801, 10480224, 10484457, 10472782, 10369738, 10462973, 10452658, 10565486	1.62003e-05
BP	chromosome organization	10574996, 10344939, 10491385, 10491014, 10352767, 10421526, 10500754, 10515481, 10483584, 10546163, 10425559, 10452701, 10419465, 10352242, 10404941, 10388409, 10568968, 10430649, 10369738, 10411728, 10379346, 10462973, 10564978, 10452658, 10543471, 10583952, 10565486, 10389627, 10433797, 10540738, 10500445, 10474381, 10523822, 10464819, 10445909, 10504957, 10367122, 10463951, 10577222, 10409557,…	1.6355e-05
MF	ATPase activity	10491014, 10532072, 10573217, 10425632, 10568521, 10581737, 10361669, 10423805, 10553788, 10412155, 10422280, 10396030, 10592140, 10564978, 10474902, 10357292, 10503723, 10500630, 10389627, 10528648, 10500960, 10372766, 10411646, 10470628, 10500445, 10438690, 10428763, 10355742, 10396849, 10549057, 10512067, 10352558, 10412177	3.27196e-05
BP	sexual reproduction	10574996, 10539617, 10419465, 10580131, 10404941, 10573172, 10595159, 10592140, 10482181, 10550730, 10491704, 10426118, 10369738, 10451721, 10490502, 10389627, 10353127, 10433797, 10522530, 10464171, 10546834, 10540738, 10506004, 10421325, 10458391, 10543259, 10432986, 10359801, 10352558, 10479010, 10363195, 10410560, 10593526, 10510305, 10436057, 10592336	3.55403e-05
BP	meiosis I	10568968, 10389627, 10359801, 10427166, 10500754, 10479010, 10410560, 10540738, 10419465, 10474902, 10421325	3.99993e-05
BP	gamete generation	10574996, 10539617, 10419465, 10580131, 10404941, 10573172, 10592140, 10482181, 10550730, 10491704, 10426118, 10369738, 10451721, 10490502, 10389627, 10353127, 10433797, 10522530, 10464171, 10546834, 10540738, 10506004, 10421325, 10458391, 10543259, 10359801, 10479010, 10352558, 10363195, 10410560, 10593526, 10510305, 10436057	6.00041e-05
MF	nuclease activity	10389627, 10397719, 10423068, 10486241, 10562818, 10527268, 10590549, 10462670, 10437778, 10442542, 10404187, 10396030, 10593205, 10352048, 10551173, 10357391, 10385842, 10491551, 10423185, 10376959, 10354649	7.61727e-05
BP	one-carbon metabolic process	10574996, 10406581, 10464171, 10511429, 10572962, 10453544, 10421325, 10367122, 10577222, 10404941, 10359801, 10480224, 10396610, 10545672, 10379346, 10462973, 10437748, 10565486, 10479765	8.42212e-05
MF	3'-5' exonuclease activity	10593205, 10551173, 10423068, 10562818, 10491551, 10486241, 10590549, 10437778	0.000101505
BP	tRNA metabolic process	10400975, 10395807, 10481368, 10487969, 10500218, 10393955, 10462670, 10359386, 10480224, 10355931, 10573434, 10484457, 10399882, 10373157, 10439532, 10357454, 10376959, 10439985, 10444605, 10488748	0.000161191
BP	reproductive cellular process	10574996, 10353127, 10433797, 10539617, 10522530, 10464171, 10419465, 10506004, 10495111, 10421325, 10458391, 10543259, 10404941, 10359801, 10592140, 10482181, 10479010, 10410560, 10510305, 10451721, 10592336	0.000169537
BP	mRNA transport	10420572, 10582599, 10506680, 10372687, 10382542, 10385052, 10592140, 10470973, 10476889, 10453334, 10574033, 10546294, 10494452, 10473650	0.0002367
MF	ATPase activity, coupled	10532072, 10573217, 10425632, 10581737, 10361669, 10553788, 10412155, 10423805, 10422280, 10396030, 10592140, 10564978, 10474902, 10357292, 10500630, 10389627, 10500960, 10372766, 10411646, 10470628, 10438690, 10355742, 10396849, 10549057, 10512067, 10352558, 10412177	0.000238148
MF	ATP-dependent helicase activity	10500630, 10500960, 10532072, 10372766, 10573217, 10470628, 10425632, 10581737, 10412155, 10396030, 10549057, 10592140, 10512067, 10352558, 10412177, 10564978, 10357292	0.000242878
MF	purine NTP-dependent helicase activity	10500630, 10500960, 10532072, 10372766, 10573217, 10470628, 10425632, 10581737, 10412155, 10396030, 10549057, 10592140, 10512067, 10352558, 10412177, 10564978, 10357292	0.000242878
BP	DNA modification	10574996, 10359801, 10480224, 10464171, 10462973, 10421325, 10367122, 10404941	0.000337194
BP	DNA methylation	10574996, 10359801, 10480224, 10464171, 10462973, 10421325, 10367122, 10404941	0.000337194
BP	DNA alkylation	10574996, 10359801, 10480224, 10464171, 10462973, 10421325, 10367122, 10404941	0.000337194
BP	double-strand break repair	10605674, 10433797, 10470665, 10531776, 10410560, 10410947, 10425632, 10355711, 10474902, 10515257, 10388409	0.000338276
BP	stem cell differentiation	10402514, 10517159, 10444853, 10491477, 10397440, 10541524, 10421325, 10360985, 10472058	0.000346865
BP	DNA replication initiation	10534974, 10605674, 10438378, 10546163, 10562563, 10572906	0.000361506
BP	biopolymer methylation	10574996, 10464171, 10572962, 10421325, 10367122, 10404941, 10577222, 10359801, 10480224, 10379346, 10462973, 10437748, 10565486, 10479765	0.000397528
BP	methylation	10574996, 10464171, 10572962, 10453544, 10421325, 10367122, 10404941, 10577222, 10359801, 10480224, 10379346, 10462973, 10437748, 10565486, 10479765	0.000402217
BP	rRNA metabolic process	10375880, 10529425, 10447521, 10462346, 10590549, 10502146, 10507557, 10423842, 10551173, 10454606, 10491551, 10423185, 10500582, 10599498, 10600485	0.000402217
BP	nucleic acid transport	10420572, 10582599, 10506680, 10372687, 10382542, 10385052, 10592140, 10470973, 10476889, 10453334, 10574033, 10546294, 10494452, 10473650	0.000468499
BP	RNA transport	10420572, 10582599, 10506680, 10372687, 10382542, 10385052, 10592140, 10470973, 10476889, 10453334, 10574033, 10546294, 10494452, 10473650	0.000468499
BP	establishment of RNA localization	10420572, 10582599, 10506680, 10372687, 10382542, 10385052, 10592140, 10470973, 10476889, 10453334, 10574033, 10546294, 10494452, 10473650	0.000468499
BP	RNA localization	10420572, 10582599, 10506680, 10372687, 10382542, 10385052, 10592140, 10470973, 10476889, 10453334, 10574033, 10546294, 10494452, 10473650	0.000549924
BP	nucleobase, nucleoside, nucleotide and nucleic acid transport	10420572, 10582599, 10506680, 10372687, 10382542, 10385052, 10592140, 10470973, 10476889, 10453334, 10574033, 10546294, 10494452, 10473650	0.000749013
BP	DNA methylation during gametogenesis	10574996, 10359801, 10464171, 10421325, 10404941	0.000795562
BP	multicellular organism reproduction	10574996, 10539617, 10419465, 10580131, 10404941, 10573172, 10592140, 10482181, 10550730, 10491704, 10426118, 10369738, 10451721, 10490502, 10389627, 10353127, 10433797, 10522530, 10464171, 10546834, 10540738, 10506004, 10467921, 10421325, 10458391, 10543259, 10359801, 10479010, 10352558, 10363195, 10410560, 10593526, 10510305, 10436057	0.000834833
BP	reproductive process in a multicellular organism	10574996, 10539617, 10419465, 10580131, 10404941, 10573172, 10592140, 10482181, 10550730, 10491704, 10426118, 10369738, 10451721, 10490502, 10389627, 10353127, 10433797, 10522530, 10464171, 10546834, 10540738, 10506004, 10467921, 10421325, 10458391, 10543259, 10359801, 10479010, 10352558, 10363195, 10410560, 10593526, 10510305, 10436057	0.000834833
BP	covalent chromatin modification	10574996, 10491385, 10515481, 10483584, 10445909, 10464819, 10367122, 10577222, 10404941, 10391221, 10472782, 10369738, 10379346, 10462973, 10565486, 10479765	0.000892971
BP	rRNA processing	10375880, 10529425, 10447521, 10462346, 10590549, 10502146, 10507557, 10423842, 10551173, 10454606, 10491551, 10500582, 10599498, 10600485	0.00115903
BP	male gamete generation	10490502, 10389627, 10539617, 10522530, 10464171, 10546834, 10419465, 10506004, 10580131, 10421325, 10573172, 10359801, 10592140, 10482181, 10352558, 10479010, 10550730, 10491704, 10363195, 10410560, 10426118, 10369738, 10451721, 10436057	0.00122085
BP	spermatogenesis	10490502, 10389627, 10539617, 10522530, 10464171, 10546834, 10419465, 10506004, 10580131, 10421325, 10573172, 10359801, 10592140, 10482181, 10352558, 10479010, 10550730, 10491704, 10363195, 10410560, 10426118, 10369738, 10451721, 10436057	0.00122085
BP	double-strand break repair via nonhomologous end joining	10605674, 10433797, 10410947, 10425632, 10355711	0.00150032
BP	non-recombinational repair	10605674, 10433797, 10410947, 10425632, 10355711	0.00150032
BP	histone modification	10574996, 10491385, 10515481, 10483584, 10445909, 10464819, 10367122, 10577222, 10404941, 10391221, 10472782, 10369738, 10379346, 10565486, 10479765	0.00160655
BP	tRNA processing	10400975, 10395807, 10481368, 10487969, 10393955, 10462670, 10480224, 10484457, 10399882, 10439532, 10376959, 10488748, 10439985	0.00160935
BP	RNA biosynthetic process	10500630, 10534990, 10372766, 10542750, 10444853, 10411646, 10560487, 10434523, 10571288, 10456814, 10454077, 10394942, 10425257, 10433672, 10367076, 10578557, 10373157, 10400391, 10408168	0.00162524
BP	stem cell maintenance	10402514, 10444853, 10491477, 10397440, 10541524, 10421325, 10472058	0.00167726
BP	stem cell development	10402514, 10444853, 10491477, 10397440, 10541524, 10421325, 10472058	0.00225157
BP	gene silencing	10517159, 10359801, 10484457, 10445458, 10472782, 10464171, 10382935, 10369738, 10462973, 10421325, 10367122	0.00227025
BP	RNA splicing	10574996, 10449471, 10573217, 10468519, 10492757, 10551971, 10494910, 10479041, 10484457, 10444595, 10447097, 10581674, 10494452, 10391768, 10400157, 10500630, 10500960, 10386125, 10536595, 10572449, 10505282, 10375031, 10500253, 10412177, 10406881	0.00232719
MF	RNA polymerase activity	10425257, 10605674, 10418131, 10367076, 10434523, 10395312, 10578557, 10400391, 10526482, 10557035	0.00290294
MF	DNA-directed RNA polymerase activity	10425257, 10605674, 10418131, 10367076, 10434523, 10395312, 10578557, 10400391, 10526482, 10557035	0.00290294
MF	exonuclease activity, active with either ribo- or deoxyribonucleic acids and producing 5'-phosphomonoesters	10352048, 10551173, 10423068, 10491551, 10590549, 10437778	0.00315804
BP	germ cell development	10353127, 10522530, 10539617, 10464171, 10419465, 10506004, 10458391, 10543259, 10592140, 10482181, 10479010, 10410560, 10510305, 10451721	0.00323681
BP	somatic cell DNA recombination	10352048, 10433797, 10410947, 10527268, 10425632, 10447417	0.00435079
BP	somatic diversification of immune receptors via germline recombination within a single locus	10352048, 10433797, 10410947, 10527268, 10425632, 10447417	0.00435079
BP	somatic diversification of immune receptors	10352048, 10433797, 10410947, 10527268, 10425632, 10447417	0.00435079
MF	DNA binding	10517159, 10515481, 10391461, 10571288, 10358210, 10524169, 10592870, 10396030, 10388409, 10394942, 10352048, 10482181, 10541524, 10410947, 10585625, 10474902, 10543471, 10447521, 10500630, 10444853, 10491477, 10500445, 10417734, 10419296, 10487564, 10456814, 10359801, 10480224, 10520521, 10479010, 10363195, 10593526, 10397440, 10491014, 10421526, 10400971, 10587892, 10478355, 10400589, 10478718,…	0.0056793
MF	exonuclease activity	10593205, 10352048, 10397719, 10551173, 10423068, 10562818, 10491551, 10486241, 10590549, 10437778	0.00574573
BP	negative regulation of DNA metabolic process	10586184, 10508151, 10546834, 10408321, 10447417, 10564978	0.00580251
BP	prophase	10568968, 10359801, 10479010, 10410560, 10421325	0.00593531
BP	meiotic prophase I	10568968, 10359801, 10479010, 10410560, 10421325	0.00593531
BP	microtubule-based process	10410576, 10427166, 10391461, 10462796, 10391811, 10474381, 10362581, 10506004, 10361669, 10547995, 10543259, 10459844, 10454709, 10463951, 10512236, 10350297, 10515431, 10519354, 10383920, 10542727, 10475293, 10456490	0.0074278
BP	gene silencing by RNA	10517159, 10359801, 10484457, 10445458, 10464171, 10382935, 10421325	0.00922726
BP	male meiosis	10389627, 10359801, 10479010, 10410560, 10582501, 10479765	0.00966707
MF	DNA-dependent ATPase activity	10389627, 10372766, 10411646, 10425632, 10438690, 10564978, 10474902, 10396849	0.0112559
BP	somatic recombination of immunoglobulin gene segments	10352048, 10433797, 10410947, 10527268, 10447417	0.0151299
BP	somatic diversification of immunoglobulins	10352048, 10433797, 10410947, 10527268, 10447417	0.0151299
BP	transcription, DNA-dependent	10500630, 10534990, 10542750, 10444853, 10411646, 10560487, 10571288, 10434523, 10456814, 10454077, 10394942, 10425257, 10433672, 10373157, 10400391, 10408168	0.0159001
MF	nucleotidyltransferase activity	10418131, 10461354, 10434523, 10562818, 10395312, 10420877, 10524169, 10507418, 10425257, 10605674, 10367076, 10578557, 10526482, 10400391, 10557035	0.0185309
BP	mRNA processing	10574996, 10449471, 10573217, 10468519, 10492757, 10551971, 10529299, 10494910, 10479041, 10484457, 10444595, 10447097, 10581674, 10494452, 10391768, 10400157, 10500630, 10500960, 10386125, 10536595, 10572449, 10505282, 10375031, 10500253, 10412177, 10406881	0.021452
BP	microtubule cytoskeleton organization	10410576, 10427166, 10391461, 10462796, 10474381, 10506004, 10361669, 10543259, 10459844, 10463951, 10383920, 10475293, 10456490	0.0220897
MF	3'-5'-exoribonuclease activity	10551173, 10491551, 10590549, 10437778	0.0226845
BP	reciprocal meiotic recombination	10389627, 10479010, 10410560, 10474902	0.0227675
BP	spermatid development	10592140, 10482181, 10539617, 10479010, 10522530, 10410560, 10419465, 10506004	0.0230242
BP	chromatin modification	10574996, 10491385, 10491014, 10421526, 10515481, 10483584, 10425559, 10500445, 10523822, 10445909, 10464819, 10367122, 10577222, 10404941, 10409557, 10391221, 10472782, 10531776, 10430649, 10369738, 10462973, 10379346, 10479765, 10565486	0.0242078
MF	chromatin binding	10491385, 10544186, 10444853, 10522712, 10491477, 10447417, 10409557, 10388409, 10605674, 10391221, 10478718, 10430649, 10585625, 10379346, 10462973, 10565486, 10479765	0.0246038
MF	DNA primase activity	10605674, 10367076, 10578557	0.0283549
MF	snoRNA binding	10529425, 10375880, 10502146	0.0283549
BP	piRNA metabolic process	10359801, 10464171, 10421325	0.0284277
BP	DNA replication, synthesis of RNA primer	10372766, 10367076, 10578557	0.0284277
BP	spermatid differentiation	10592140, 10482181, 10539617, 10479010, 10522530, 10410560, 10419465, 10506004	0.0294329
BP	immunoglobulin production	10352048, 10433797, 10410947, 10527268, 10447417	0.0302766
BP	synapsis	10568968, 10359801, 10500754, 10540738, 10419465	0.0302766
BP	chromosome organization involved in meiosis	10568968, 10359801, 10500754, 10540738, 10419465	0.0302766
BP	response to ionizing radiation	10524266, 10433797, 10531776, 10593526, 10410947, 10425632, 10355711, 10515257	0.0330479
BP	nuclear export	10582599, 10592140, 10476889, 10445458, 10492598, 10473650	0.0360349
BP	production of molecular mediator of immune response	10352048, 10433797, 10410947, 10527268, 10447417	0.0367657
BP	nuclear mRNA splicing, via spliceosome	10574996, 10505282, 10400157, 10468519, 10447097, 10444595, 10406881	0.0375496
BP	RNA splicing, via transesterification reactions	10574996, 10505282, 10400157, 10468519, 10447097, 10444595, 10406881	0.0375496
BP	RNA splicing, via transesterification reactions with bulged adenosine as nucleophile	10574996, 10505282, 10400157, 10468519, 10447097, 10444595, 10406881	0.0375496
BP	mRNA metabolic process	10574996, 10449471, 10573217, 10468519, 10492757, 10437778, 10551971, 10529299, 10494910, 10479041, 10484457, 10444595, 10447097, 10581674, 10494452, 10391768, 10400157, 10500630, 10500960, 10386125, 10536595, 10572449, 10505282, 10375031, 10500253, 10412177, 10493210, 10406881	0.038037
MF	exoribonuclease activity, producing 5'-phosphomonoesters	10551173, 10491551, 10590549, 10437778	0.0399969
MF	exoribonuclease activity	10551173, 10491551, 10590549, 10437778	0.0399969
BP	DNA unwinding during replication	10534974, 10546163, 10433910, 10474902	0.0401369
BP	mismatch repair	10354542, 10352048, 10527268, 10447417	0.0401369
BP	cellular response to DNA damage stimulus	10359801, 10385842, 10577866, 10546834	0.0401369
BP	translation	10433480, 10542034, 10507418, 10359386, 10471550, 10591357, 10523365, 10515425, 10355931, 10526977, 10396795, 10373157, 10437748, 10487969, 10500218, 10542872, 10475830, 10400605, 10428074, 10573434, 10352947, 10546104, 10357454, 10368935, 10437737, 10444605	0.0406426
BP	regulation of DNA metabolic process	10538755, 10586184, 10508151, 10531776, 10546834, 10408321, 10447417, 10564978	0.0411379
BP	reproductive developmental process	10353127, 10433797, 10539617, 10522530, 10464171, 10491477, 10419465, 10506004, 10495111, 10458391, 10582501, 10543259, 10592140, 10482181, 10479010, 10410560, 10478718, 10541524, 10369738, 10510305, 10451721	0.0412441
MF	dynein binding	10361669, 10360985, 10463951	0.0450177
BP	ribonucleoprotein complex assembly	10574996, 10468519, 10447097, 10484457, 10444595, 10406881	0.0478492
E12.5 ♂+♀ germ cell depleted
Category	Term	Transcript cluster IDs	p-value
BP	regulation of action potential	10447708, 10376950, 10362596, 10461844, 10380896, 10354494, 10463355, 10363735, 10379262	0.000139187
MF	enzyme inhibitor activity	10399470, 10504424, 10388430, 10418702, 10565794, 10523451, 10408600, 10440491, 10488415, 10365482, 10498576, 10404422, 10542310, 10598976	0.00017894
BP	myelination	10447708, 10376950, 10362596, 10380896, 10354494, 10463355, 10363735, 10379262	0.000221073
BP	regulation of membrane potential	10447708, 10376950, 10362596, 10357043, 10461844, 10380896, 10354494, 10463355, 10496338, 10363735, 10449303, 10379262	0.000256751
MF	endopeptidase inhibitor activity	10504424, 10388430, 10488415, 10565794, 10365482, 10408600, 10404422, 10498576, 10598976, 10440491	0.000262168
BP	regulation of cAMP metabolic process	10605256, 10461844, 10596704, 10523727, 10479112, 10501586, 10445078, 10379262	0.000339382
BP	axon ensheathment	10447708, 10376950, 10362596, 10380896, 10354494, 10463355, 10363735, 10379262	0.000339382
BP	ensheathment of neurons	10447708, 10376950, 10362596, 10380896, 10354494, 10463355, 10363735, 10379262	0.000339382
BP	ossification	10498379, 10357043, 10405605, 10381006, 10498284, 10354494, 10479112, 10421361, 10498383, 10445078, 10379262, 10415052	0.000410861
MF	peptidase inhibitor activity	10504424, 10388430, 10488415, 10565794, 10365482, 10408600, 10404422, 10498576, 10598976, 10440491	0.000477296
BP	regulation of action potential in neuron	10447708, 10376950, 10362596, 10380896, 10354494, 10463355, 10363735, 10379262	0.000503706
BP	regulation of cyclic nucleotide metabolic process	10605256, 10461844, 10596704, 10523727, 10479112, 10501586, 10445078, 10379262	0.000606763
BP	blood vessel development	10447708, 10504424, 10371959, 10501586, 10449303, 10423902, 10506488, 10346564, 10474295, 10504817, 10401238, 10399360, 10405605, 10380219, 10362538, 10379262, 10502655, 10413185, 10345442, 10415052	0.000696995
BP	regulation of nucleotide metabolic process	10605256, 10461844, 10596704, 10523727, 10479112, 10501586, 10445078, 10379262	0.000725881
BP	regulation of melanocyte differentiation	10357043, 10461844, 10546454, 10546434, 10366052	0.000739613
BP	regulation of pigment cell differentiation	10357043, 10461844, 10546454, 10546434, 10366052	0.000739613
BP	skeletal system development	10473847, 10472965, 10357043, 10424400, 10354494, 10498383, 10365136, 10445078, 10498379, 10461844, 10504817, 10405605, 10453678, 10381006, 10498284, 10459089, 10421361, 10479112, 10379262, 10415052	0.000754088
BP	cellular ion homeostasis	10447708, 10357043, 10354494, 10501586, 10449303, 10440491, 10376950, 10362596, 10461844, 10380896, 10411229, 10523727, 10496338, 10463355, 10363735, 10379262, 10556583	0.000917721
BP	vasculature development	10447708, 10504424, 10371959, 10501586, 10449303, 10423902, 10506488, 10346564, 10474295, 10504817, 10401238, 10399360, 10405605, 10380219, 10362538, 10379262, 10502655, 10413185, 10345442, 10415052	0.00100771
BP	regulation of cyclase activity	10605256, 10461844, 10596704, 10479112, 10501586, 10445078, 10379262	0.00102105
BP	regulation of lyase activity	10605256, 10461844, 10596704, 10479112, 10501586, 10445078, 10379262	0.00102105
BP	regulation of adenylate cyclase activity	10605256, 10461844, 10596704, 10479112, 10501586, 10445078, 10379262	0.00102105
BP	negative regulation of transport	10357043, 10605256, 10447341, 10596704, 10360227, 10523727, 10586933, 10370376, 10379262	0.00103682
BP	positive regulation of molecular function	10357043, 10424400, 10482448, 10501586, 10360205, 10449303, 10555681, 10559261, 10369210, 10461844, 10411229, 10380341, 10590452, 10596704, 10479112, 10579925, 10379262, 10485466, 10366052	0.00117423
BP	blood vessel morphogenesis	10447708, 10371959, 10501586, 10449303, 10423902, 10346564, 10474295, 10504817, 10401238, 10399360, 10405605, 10380219, 10379262, 10502655, 10413185, 10345442, 10415052	0.00120897
BP	cellular chemical homeostasis	10447708, 10357043, 10354494, 10501586, 10449303, 10440491, 10376950, 10362596, 10461844, 10380896, 10411229, 10523727, 10496338, 10463355, 10363735, 10379262, 10556583	0.00120897
BP	bone development	10498379, 10357043, 10405605, 10381006, 10498284, 10354494, 10479112, 10421361, 10498383, 10445078, 10379262, 10415052	0.00130032
BP	positive regulation of catalytic activity	10357043, 10424400, 10482448, 10501586, 10360205, 10449303, 10559261, 10369210, 10461844, 10411229, 10380341, 10590452, 10596704, 10479112, 10579925, 10379262, 10366052	0.00138173
BP	positive regulation of transcription from RNA polymerase II promoter	10604393, 10424400, 10420747, 10506031, 10501586, 10423902, 10514054, 10440491, 10506050, 10474295, 10552874, 10514466, 10399725, 10464084, 10541895, 10405605, 10453678, 10381006, 10498284, 10453857, 10363735, 10413185, 10397346	0.00142252
BP	regulation of transcription from RNA polymerase II promoter	10472965, 10604393, 10420747, 10506031, 10387372, 10436830, 10423902, 10514054, 10440491, 10506050, 10474295, 10552874, 10514466, 10464084, 10541895, 10405605, 10381006, 10445071, 10424400, 10446763, 10501586, 10594879, 10365136, 10475625, 10421269, 10534596, 10399725, 10453678, 10498284, 10453857, 10363735, 10524983, 10413185, 10397346	0.00147567
BP	regulation of cAMP biosynthetic process	10605256, 10461844, 10596704, 10479112, 10501586, 10445078, 10379262	0.00149663
BP	negative regulation of molecular function	10605256, 10424400, 10418702, 10596704, 10381006, 10523727, 10346562, 10501586, 10445078, 10379262, 10485466, 10542310	0.00171396
BP	muscle cell differentiation	10447708, 10380896, 10411229, 10454580, 10420747, 10377319, 10543944, 10496338, 10453857, 10492310, 10440491	0.00194161
BP	positive regulation of transcription, DNA-dependent	10604393, 10420747, 10506031, 10423902, 10514054, 10440491, 10552874, 10474295, 10506050, 10514466, 10464084, 10541895, 10405605, 10604347, 10381006, 10424400, 10501586, 10399725, 10523670, 10453678, 10498284, 10453857, 10363735, 10413185, 10397346	0.00219612
BP	regulation of phosphate metabolic process	10346651, 10357043, 10380477, 10399470, 10418702, 10482448, 10426180, 10449303, 10440491, 10559261, 10514466, 10411229, 10380341, 10596704, 10579925, 10379262, 10447294, 10366052, 10542310	0.00223066
BP	regulation of phosphorus metabolic process	10346651, 10357043, 10380477, 10399470, 10418702, 10482448, 10426180, 10449303, 10440491, 10559261, 10514466, 10411229, 10380341, 10596704, 10579925, 10379262, 10447294, 10366052, 10542310	0.00223066
BP	regulation of cyclic nucleotide biosynthetic process	10605256, 10461844, 10596704, 10479112, 10501586, 10445078, 10379262	0.00250437
BP	regulation of nucleotide biosynthetic process	10605256, 10461844, 10596704, 10479112, 10501586, 10445078, 10379262	0.00250437
BP	positive regulation of RNA metabolic process	10604393, 10420747, 10506031, 10423902, 10514054, 10440491, 10552874, 10474295, 10506050, 10514466, 10464084, 10541895, 10405605, 10604347, 10381006, 10424400, 10501586, 10399725, 10523670, 10453678, 10498284, 10453857, 10363735, 10413185, 10397346	0.00251662
BP	ion homeostasis	10447708, 10357043, 10354494, 10501586, 10449303, 10440491, 10376950, 10362596, 10461844, 10380896, 10411229, 10523727, 10496338, 10463355, 10363735, 10379262, 10556583	0.0027481
BP	cellular homeostasis	10447708, 10357043, 10405539, 10354494, 10501586, 10449303, 10440491, 10376950, 10362596, 10461844, 10380896, 10521222, 10411229, 10523727, 10463355, 10496338, 10457183, 10363735, 10379262, 10556583	0.00288408
BP	regulation of metal ion transport	10357043, 10411229, 10596704, 10523727, 10586933, 10449303, 10555681	0.00293308
BP	positive regulation of macromolecule metabolic process	10604393, 10427420, 10420747, 10506031, 10423902, 10514054, 10440491, 10506050, 10474295, 10552874, 10514466, 10564451, 10541895, 10464084, 10405605, 10604347, 10381006, 10566132, 10366052, 10346651, 10357043, 10424400, 10501586, 10586933, 10559261, 10399725, 10523670, 10453678, 10498284, 10453857, 10363735, 10413185, 10397346	0.0029907
BP	regulation of calcium ion transport	10357043, 10411229, 10596704, 10523727, 10449303, 10555681	0.00308992
MF	transcription factor activity	10472965, 10604393, 10560481, 10420747, 10482448, 10506031, 10571705, 10371959, 10514054, 10428755, 10506050, 10474295, 10552874, 10470182, 10514466, 10564451, 10405605, 10420823, 10381006, 10526726, 10569972, 10424400, 10402066, 10534596, 10399725, 10523670, 10460057, 10453678, 10437160, 10428536, 10453857, 10363735, 10428534, 10416522, 10402063, 10397346	0.00323371
BP	regulation of phosphorylation	10346651, 10357043, 10380477, 10399470, 10418702, 10482448, 10449303, 10440491, 10559261, 10514466, 10411229, 10380341, 10596704, 10579925, 10379262, 10447294, 10542310, 10366052	0.00328244
BP	positive regulation of transcription	10604393, 10420747, 10506031, 10423902, 10514054, 10440491, 10552874, 10474295, 10506050, 10514466, 10564451, 10464084, 10541895, 10405605, 10604347, 10381006, 10566132, 10424400, 10501586, 10399725, 10523670, 10453678, 10498284, 10453857, 10363735, 10413185, 10397346	0.00359632
BP	regulation of protein amino acid phosphorylation	10346651, 10559261, 10357043, 10514466, 10380477, 10482448, 10579925, 10449303, 10447294, 10366052	0.00386793
BP	neuron differentiation	10536297, 10357043, 10458843, 10380477, 10553598, 10501586, 10440491, 10383758, 10411519, 10461844, 10534596, 10504817, 10380896, 10398267, 10604347, 10543944, 10377319, 10357875, 10363735	0.00441378
BP	positive regulation of gene expression	10604393, 10420747, 10506031, 10423902, 10514054, 10440491, 10552874, 10474295, 10506050, 10514466, 10564451, 10464084, 10541895, 10405605, 10604347, 10381006, 10566132, 10424400, 10501586, 10399725, 10523670, 10453678, 10498284, 10453857, 10363735, 10413185, 10397346	0.00455393
BP	regulation of cell adhesion	10411782, 10357043, 10403584, 10472820, 10501586, 10362538, 10379262, 10502655, 10415052	0.00479045
BP	detection of stimulus	10362596, 10424400, 10344966, 10523727, 10498576, 10555681	0.00528036
BP	positive regulation of pigment cell differentiation	10357043, 10546454, 10546434, 10366052	0.00537823
BP	positive regulation of melanocyte differentiation	10357043, 10546454, 10546434, 10366052	0.00537823
BP	regulation of pigmentation during development	10357043, 10461844, 10546454, 10546434, 10366052	0.00546065
BP	negative regulation of lyase activity	10605256, 10596704, 10501586, 10445078	0.00546065
BP	negative regulation of adenylate cyclase activity	10605256, 10596704, 10501586, 10445078	0.00546065
BP	negative regulation of cyclase activity	10605256, 10596704, 10501586, 10445078	0.00546065
BP	protein maturation	10578904, 10424400, 10565794, 10601846, 10598178, 10509441, 10360205, 10415052	0.00579882
MF	sequence-specific DNA binding	10472965, 10604393, 10560481, 10420747, 10482448, 10371959, 10387372, 10428755, 10474295, 10514466, 10564451, 10420823, 10381006, 10569972, 10424400, 10402066, 10399725, 10534596, 10460057, 10453678, 10437160, 10428536, 10453857, 10428534, 10402063, 10397346	0.00580321
BP	regulation of ion transport	10357043, 10411229, 10596704, 10523727, 10586933, 10449303, 10555681	0.00594201
BP	actin cytoskeleton organization	10536297, 10357043, 10605256, 10380477, 10447341, 10418578, 10605884, 10398267, 10512514, 10377319, 10566132, 10379262, 10406852	0.0069103
BP	regulation of cell-substrate adhesion	10411782, 10357043, 10403584, 10379262, 10502655, 10415052	0.00724062
BP	regulation of cell-matrix adhesion	10411782, 10357043, 10379262, 10415052	0.00755464
BP	small GTPase mediated signal transduction	10358733, 10503134, 10480145, 10495054, 10531610, 10452485, 10447341, 10468231, 10418578, 10452556, 10357158, 10600390, 10372891, 10399360, 10493692, 10566132, 10379262	0.0076472
BP	response to wounding	10357043, 10344966, 10497817, 10371959, 10387372, 10559261, 10411229, 10398267, 10541895, 10543944, 10377319, 10459089, 10365482, 10379262, 10415844	0.00796384
MF	serine-type endopeptidase inhibitor activity	10504424, 10388430, 10565794, 10408600, 10404422, 10440491	0.00886175
BP	extracellular structure organization	10380896, 10411229, 10504817, 10504424, 10403584, 10565794, 10405587, 10379262, 10502655, 10440491	0.00971971
BP	positive regulation of nucleobase, nucleoside, nucleotide and nucleic acid metabolic process	10604393, 10420747, 10506031, 10423902, 10514054, 10440491, 10552874, 10474295, 10506050, 10514466, 10564451, 10464084, 10541895, 10405605, 10604347, 10381006, 10566132, 10424400, 10501586, 10399725, 10523670, 10453678, 10498284, 10453857, 10363735, 10413185, 10397346	0.0097419
BP	positive regulation of signal transduction	10437687, 10554094, 10421269, 10605256, 10352234, 10482448, 10509441, 10579925, 10361098, 10485466, 10366052	0.00986484
BP	actin filament-based process	10536297, 10357043, 10605256, 10380477, 10447341, 10418578, 10605884, 10398267, 10512514, 10377319, 10566132, 10379262, 10406852	0.00994983
BP	positive regulation of macromolecule biosynthetic process	10604393, 10420747, 10506031, 10423902, 10514054, 10440491, 10552874, 10474295, 10506050, 10514466, 10564451, 10464084, 10541895, 10405605, 10604347, 10381006, 10566132, 10424400, 10501586, 10399725, 10523670, 10453678, 10498284, 10453857, 10363735, 10413185, 10397346	0.0101957
BP	cell surface receptor linked signal transduction	10605256, 10458843, 10502774, 10522749, 10484402, 10440491, 10411782, 10464251, 10380896, 10567355, 10411229, 10504817, 10502748, 10541895, 10464084, 10405605, 10416371, 10596704, 10352234, 10472820, 10598178, 10516706, 10605811, 10346651, 10554094, 10502780, 10570855, 10501586, 10360205, 10435676, 10498383, 10365136, 10502766, 10445078, 10373093, 10362596, 10498379, 10461844, 10580033, 10601412,…	0.0103421
BP	glomerulus development	10357043, 10498284, 10403584	0.0104509
BP	positive regulation of pigmentation during development	10357043, 10546454, 10546434, 10366052	0.0104509
BP	extracellular matrix organization	10504817, 10504424, 10403584, 10565794, 10405587, 10379262, 10502655, 10440491	0.0106379
BP	transmission of nerve impulse	10447708, 10376950, 10362596, 10380896, 10354494, 10463355, 10496338, 10501586, 10518585, 10363735, 10379262, 10440491	0.0110067
BP	G-protein signaling, coupled to cAMP nucleotide second messenger	10605256, 10461844, 10596704, 10479112, 10501586	0.0112609
BP	striated muscle tissue development	10380896, 10411229, 10420747, 10377319, 10496338, 10453857, 10379262, 10423902, 10492310, 10440491	0.0112691
MF	transcription regulator activity	10472965, 10514054, 10428755, 10552874, 10506050, 10514466, 10405605, 10381006, 10420823, 10381187, 10541771, 10569972, 10424400, 10446763, 10402066, 10534596, 10523670, 10460057, 10498284, 10453857, 10363735, 10529375, 10402063, 10604393, 10529923, 10560481, 10420747, 10482448, 10571705, 10506031, 10354494, 10371959, 10423902, 10470182, 10474295, 10564451, 10604347, 10516706, 10526726, 10357043,…	0.0114836
BP	striated muscle cell differentiation	10380896, 10411229, 10420747, 10377319, 10543944, 10496338, 10453857, 10440491	0.0116655
BP	positive regulation of nitrogen compound metabolic process	10604393, 10420747, 10506031, 10423902, 10514054, 10440491, 10552874, 10474295, 10506050, 10514466, 10564451, 10464084, 10541895, 10405605, 10604347, 10381006, 10566132, 10424400, 10501586, 10399725, 10523670, 10453678, 10498284, 10453857, 10363735, 10413185, 10397346	0.0131031
BP	cytoskeleton-dependent intracellular transport	10457273, 10398267, 10377319, 10518585, 10440491	0.0133068
BP	regulation of transferase activity	10399470, 10418702, 10482448, 10440491, 10369210, 10559261, 10411229, 10380341, 10596704, 10579925, 10379262, 10542310, 10366052	0.013938
MF	transcription activator activity	10357043, 10604393, 10420747, 10446763, 10506031, 10594879, 10514054, 10506050, 10552874, 10474295, 10564451, 10399725, 10523670, 10381006, 10498284, 10381187, 10453857, 10541771	0.0143093
MF	cytoskeletal protein binding	10368675, 10605256, 10457273, 10380477, 10553598, 10411519, 10377319, 10572747, 10377689, 10379262, 10406852, 10542200, 10605884, 10396511, 10537184, 10453636, 10362596, 10521222, 10398267, 10512514, 10396485, 10380341, 10396606, 10518585, 10396608	0.0146241
MF	calcium ion binding	10375679, 10535231, 10523451, 10435641, 10381122, 10403584, 10572747, 10472820, 10421361, 10395103, 10455148, 10493995, 10545958, 10538547, 10561842, 10577164, 10542965, 10533145, 10483865, 10497817, 10555681, 10453636, 10458999, 10426479, 10580033, 10491732, 10523727, 10519504, 10556583, 10415052	0.014883
BP	positive regulation of cellular biosynthetic process	10604393, 10420747, 10506031, 10423902, 10514054, 10440491, 10552874, 10474295, 10506050, 10514466, 10564451, 10464084, 10541895, 10405605, 10604347, 10381006, 10566132, 10424400, 10501586, 10399725, 10523670, 10453678, 10498284, 10453857, 10363735, 10413185, 10397346	0.014916
BP	regulation of protein modification process	10346651, 10559261, 10357043, 10514466, 10427420, 10380477, 10482448, 10579925, 10449303, 10447294, 10366052	0.0155089
BP	positive regulation of biosynthetic process	10604393, 10420747, 10506031, 10423902, 10514054, 10440491, 10552874, 10474295, 10506050, 10514466, 10564451, 10464084, 10541895, 10405605, 10604347, 10381006, 10566132, 10424400, 10501586, 10399725, 10523670, 10453678, 10498284, 10453857, 10363735, 10413185, 10397346	0.0159527
BP	regeneration	10357043, 10577164, 10543944, 10365482	0.0163603
BP	wound healing	10411229, 10398267, 10377319, 10543944, 10497817, 10371959, 10365482, 10379262	0.0165
MF	cysteine-type endopeptidase activity	10561842, 10346562, 10410124, 10415844, 10587733, 10346564	0.0169136
BP	negative regulation of cell-matrix adhesion	10411782, 10379262, 10415052	0.016925
BP	regulation of RNA metabolic process	10472965, 10357579, 10514054, 10428755, 10440491, 10506050, 10552874, 10514466, 10401238, 10541895, 10464084, 10405605, 10381006, 10420823, 10569972, 10370544, 10424400, 10446763, 10501586, 10402066, 10534596, 10523670, 10460057, 10498284, 10453857, 10363735, 10413185, 10402063, 10492310, 10591763, 10604393, 10560481, 10420747, 10482448, 10506031, 10571705, 10371959, 10387372, 10436830, 10423902,…	0.0169993
BP	regulation of hydrolase activity	10375679, 10422028, 10602020, 10424400, 10426180, 10346562, 10600390, 10501586, 10449303, 10461844, 10411229, 10590452, 10379262	0.0172073
MF	metalloenzyme inhibitor activity	10365482, 10498576, 10598976	0.0173645
MF	metalloenzyme regulator activity	10365482, 10498576, 10598976	0.0173645
MF	metalloendopeptidase inhibitor activity	10365482, 10498576, 10598976	0.0173645
BP	biological adhesion	10455148, 10357043, 10434782, 10506658, 10484402, 10440491, 10408850, 10421269, 10580033, 10512514, 10399360, 10391103, 10491732, 10381006, 10403584, 10472820, 10405587, 10362538, 10502655, 10607259, 10366052, 10537770	0.0179388
BP	cell adhesion	10455148, 10357043, 10434782, 10506658, 10484402, 10440491, 10408850, 10421269, 10580033, 10512514, 10399360, 10391103, 10491732, 10381006, 10403584, 10472820, 10405587, 10362538, 10502655, 10607259, 10366052, 10537770	0.0179388
BP	G-protein signaling, coupled to cyclic nucleotide second messenger	10605256, 10461844, 10596704, 10479112, 10501586	0.0180717
BP	muscle tissue development	10380896, 10411229, 10420747, 10377319, 10496338, 10453857, 10379262, 10423902, 10492310, 10440491	0.018169
BP	kidney development	10474295, 10357043, 10545958, 10504817, 10498284, 10403584, 10523727, 10440522, 10379262	0.0184047
BP	positive regulation of cell communication	10437687, 10554094, 10421269, 10605256, 10352234, 10482448, 10509441, 10579925, 10361098, 10485466, 10366052	0.0185522
BP	chemical homeostasis	10447708, 10357043, 10354494, 10501586, 10449303, 10440491, 10376950, 10362596, 10461844, 10380896, 10411229, 10523727, 10496338, 10463355, 10363735, 10379262, 10556583	0.0193783
BP	chordate embryonic development	10420747, 10482448, 10509441, 10423902, 10422728, 10346564, 10446376, 10504817, 10521222, 10464084, 10453678, 10377319, 10523727, 10459089, 10381187, 10453857, 10479112, 10579925, 10379262, 10502655, 10413185, 10345442, 10492310	0.0196565
BP	regulation of protein kinase activity	10559261, 10411229, 10399470, 10380341, 10418702, 10596704, 10482448, 10579925, 10379262, 10366052, 10440491, 10542310	0.0205638
BP	cAMP-mediated signaling	10605256, 10461844, 10596704, 10479112, 10501586	0.0208037
MF	extracellular matrix binding	10403584, 10472820, 10405587, 10502655	0.0208972
BP	positive regulation of hydrolase activity	10461844, 10411229, 10424400, 10590452, 10501586, 10449303, 10379262	0.0213558
BP	positive regulation of protein kinase cascade	10437687, 10554094, 10421269, 10605256, 10579925, 10361098, 10485466	0.0213558
BP	embryonic development ending in birth or egg hatching	10420747, 10482448, 10509441, 10423902, 10422728, 10346564, 10446376, 10504817, 10521222, 10464084, 10453678, 10377319, 10523727, 10459089, 10381187, 10453857, 10479112, 10579925, 10379262, 10502655, 10413185, 10345442, 10492310	0.0216601
MF	transferase activity, transferring sulfur-containing groups	10511803, 10474860, 10459089, 10604542, 10345442	0.0217362
BP	positive regulation of cell differentiation	10357043, 10420747, 10388430, 10405605, 10352234, 10431424, 10546454, 10546434, 10479112, 10453857, 10497548, 10366052	0.0232656
BP	cellular calcium ion homeostasis	10357043, 10411229, 10523727, 10501586, 10449303, 10556583, 10440491	0.0232987
BP	endoplasmic reticulum calcium ion homeostasis	10357043, 10449303, 10440491	0.0246715
BP	negative regulation of cell-substrate adhesion	10411782, 10379262, 10415052	0.0246715
BP	muscle organ development	10380896, 10411229, 10431585, 10420747, 10377319, 10496338, 10453857, 10379262, 10423902, 10492310, 10440491	0.0259226
BP	regulation of kinase activity	10559261, 10411229, 10399470, 10380341, 10418702, 10596704, 10482448, 10579925, 10379262, 10366052, 10440491, 10542310	0.0265125
BP	response to organic substance	10473847, 10357043, 10344966, 10424400, 10447341, 10497817, 10452980, 10370376, 10477986, 10444658, 10362596, 10411782, 10411229, 10504817, 10365482, 10363735, 10502655, 10397346, 10415052	0.0271686
BP	regulation of homeostatic process	10357043, 10411229, 10523727, 10449303, 10379262, 10366052	0.0273466
MF	calmodulin binding	10368675, 10521222, 10377319, 10496338, 10537184, 10495896, 10406852, 10400191	0.0278887
BP	positive regulation of lipase activity	10461844, 10411229, 10590452, 10501586	0.0291271
BP	di-, tri-valent inorganic cation transport	10411229, 10600857, 10533145, 10523727, 10383799, 10519504, 10496338, 10495896, 10555681	0.0292327
BP	negative regulation of catalytic activity	10605256, 10418702, 10596704, 10346562, 10501586, 10445078, 10379262, 10542310	0.0301191
BP	cyclic-nucleotide-mediated signaling	10605256, 10461844, 10596704, 10479112, 10501586	0.030457
BP	embryonic organ development	10424400, 10420747, 10423902, 10504817, 10464084, 10460057, 10453678, 10459089, 10523727, 10479112, 10579925, 10502655, 10345442	0.0304919
BP	regulation of cellular protein metabolic process	10447708, 10346651, 10357043, 10427420, 10380477, 10482448, 10449303, 10539710, 10440491, 10559261, 10514466, 10401238, 10509463, 10579925, 10447294, 10366052	0.0306986
BP	calcium ion homeostasis	10357043, 10411229, 10523727, 10501586, 10449303, 10556583, 10440491	0.0322469
BP	skeletal muscle organ development	10380896, 10411229, 10496338, 10379262, 10492310, 10440491	0.0329928
BP	skeletal muscle tissue development	10380896, 10411229, 10496338, 10379262, 10492310, 10440491	0.0329928
BP	Schwann cell differentiation	10354494, 10363735, 10379262	0.0335695
BP	detection of mechanical stimulus	10362596, 10424400, 10523727	0.0335695
BP	inhibition of adenylate cyclase activity by G-protein signaling	10605256, 10596704, 10501586	0.0335695
BP	positive regulation of developmental process	10357043, 10388430, 10420747, 10431424, 10546454, 10546434, 10497548, 10399360, 10405605, 10352234, 10453857, 10479112, 10366052	0.0336175
BP	heart development	10420747, 10423902, 10346564, 10461844, 10504817, 10380896, 10377319, 10523727, 10381187, 10453857, 10440522, 10579925, 10379262, 10413185	0.0339681
MF	tetrapyrrole binding	10345141, 10599200, 10383799, 10461439, 10361098, 10485466, 10395103	0.0341019
BP	skeletal muscle fiber development	10380896, 10411229, 10496338, 10440491	0.0342699
BP	cellular metal ion homeostasis	10357043, 10411229, 10523727, 10501586, 10449303, 10556583, 10440491	0.0347892
BP	regulation of transcription, DNA-dependent	10472965, 10514054, 10428755, 10440491, 10506050, 10552874, 10514466, 10541895, 10464084, 10405605, 10381006, 10420823, 10569972, 10370544, 10424400, 10446763, 10501586, 10402066, 10534596, 10523670, 10460057, 10498284, 10453857, 10363735, 10413185, 10402063, 10591763, 10604393, 10560481, 10420747, 10482448, 10506031, 10571705, 10371959, 10387372, 10436830, 10423902, 10474295, 10470182, 10564451,…	0.0356977
MF	endopeptidase activity	10570855, 10561842, 10536294, 10516007, 10546454, 10346562, 10509441, 10546434, 10587733, 10346564, 10421361, 10410124, 10440522, 10415844, 10415052	0.0357258
BP	urogenital system development	10474295, 10554094, 10357043, 10545958, 10504817, 10498284, 10403584, 10523727, 10440522, 10379262	0.0364251
BP	striated muscle cell development	10380896, 10411229, 10377319, 10496338, 10440491	0.0381381
BP	intracellular signaling cascade	10358733, 10605256, 10503134, 10531610, 10452485, 10447341, 10468231, 10418702, 10452556, 10357158, 10372891, 10411229, 10587299, 10596704, 10352234, 10493692, 10566132, 10541771, 10379262, 10447294, 10495054, 10480145, 10418578, 10360227, 10600390, 10427928, 10501586, 10435676, 10559261, 10461844, 10399360, 10380341, 10459089, 10523727, 10479112, 10579925, 10388938	0.0391409
BP	maintenance of protein location in cell	10373036, 10605256, 10553131, 10512514	0.0398493
BP	regulation of myeloid leukocyte differentiation	10411782, 10479112, 10379262, 10366052	0.0398493
BP	detection of abiotic stimulus	10362596, 10424400, 10523727, 10498576	0.0398493
BP	programmed cell death	10437687, 10357043, 10458843, 10536294, 10502552, 10424400, 10418578, 10360227, 10452980, 10502565, 10346562, 10509441, 10449303, 10539710, 10346564, 10440491, 10564451, 10399360, 10541895, 10471844, 10589350, 10453857, 10421557, 10366052	0.0399515
BP	homeostatic process	10447708, 10357043, 10427420, 10600857, 10405539, 10354494, 10501586, 10449303, 10440491, 10376950, 10362596, 10461844, 10411229, 10380896, 10521222, 10405605, 10523727, 10463355, 10496338, 10457183, 10363735, 10379262, 10556583, 10598976	0.0403732
BP	regulation of cell motion	10411782, 10357043, 10418578, 10501586, 10362538, 10579925, 10379262, 10542310	0.0416651
BP	phosphorus metabolic process	10357579, 10593856, 10399470, 10558515, 10483381, 10443021, 10513957, 10495896, 10440491, 10388682, 10411782, 10380896, 10504817, 10411229, 10587299, 10358259, 10596704, 10410099, 10381187, 10447294, 10346651, 10554094, 10357043, 10362314, 10452980, 10427928, 10545001, 10435676, 10498383, 10362596, 10559261, 10498379, 10471844, 10380341, 10489343, 10407126, 10496338, 10579925, 10480249	0.0421935
BP	phosphate metabolic process	10357579, 10593856, 10399470, 10558515, 10483381, 10443021, 10513957, 10495896, 10440491, 10388682, 10411782, 10380896, 10504817, 10411229, 10587299, 10358259, 10596704, 10410099, 10381187, 10447294, 10346651, 10554094, 10357043, 10362314, 10452980, 10427928, 10545001, 10435676, 10498383, 10362596, 10559261, 10498379, 10471844, 10380341, 10489343, 10407126, 10496338, 10579925, 10480249	0.0421935
BP	regulation of angiogenesis	10399360, 10420747, 10388430, 10440522, 10379262	0.0423572
BP	negative regulation of transcription	10472965, 10445071, 10424400, 10482448, 10354494, 10387372, 10365136, 10423902, 10428755, 10475625, 10474295, 10421269, 10534596, 10453678, 10381006, 10498284, 10516706, 10428536, 10428534, 10529375	0.0425787
BP	neuron development	10536297, 10357043, 10458843, 10380477, 10553598, 10440491, 10411519, 10383758, 10461844, 10380896, 10398267, 10377319, 10363735	0.0427092
BP	regulation of MAP kinase activity	10559261, 10399470, 10380341, 10482448, 10579925, 10379262, 10366052	0.0431773
BP	dopamine receptor signaling pathway	10605256, 10461844, 10479112	0.0435062
BP	cell projection organization	10536297, 10357043, 10458843, 10380477, 10553598, 10483819, 10440491, 10411519, 10380896, 10398267, 10498284, 10377319, 10472820, 10521626, 10363735	0.0443814
BP	neuron projection development	10536297, 10411519, 10357043, 10458843, 10380896, 10380477, 10398267, 10377319, 10553598, 10363735, 10440491	0.0445064
BP	regulation of lipase activity	10461844, 10411229, 10590452, 10501586	0.0458579
BP	metal ion homeostasis	10357043, 10411229, 10523727, 10501586, 10449303, 10556583, 10440491	0.0462318
BP	protein processing	10578904, 10424400, 10601846, 10509441, 10360205, 10415052	0.0463268
MF	sulfotransferase activity	10474860, 10459089, 10604542, 10345442	0.0474108
BP	cytoskeleton organization	10536297, 10357043, 10605256, 10380477, 10447341, 10418578, 10605884, 10530633, 10453636, 10411519, 10512514, 10398267, 10377319, 10377689, 10566132, 10379262, 10406852	0.047493
BP	death	10458843, 10502552, 10536294, 10346562, 10509441, 10449303, 10440491, 10346564, 10564451, 10411229, 10541895, 10589350, 10421557, 10366052, 10437687, 10357043, 10424400, 10418578, 10360227, 10502565, 10452980, 10539710, 10399360, 10471844, 10453857	0.0483496
MF	double-stranded DNA binding	10474295, 10424400, 10453678, 10514054, 10397346	0.0487799
BP	calcium ion transport	10411229, 10533145, 10523727, 10519504, 10496338, 10495896, 10555681	0.0494173
BP	protein amino acid phosphorylation	10357579, 10593856, 10399470, 10483381, 10495896, 10440491, 10411782, 10388682, 10411229, 10504817, 10380896, 10587299, 10596704, 10358259, 10447294, 10346651, 10554094, 10357043, 10452980, 10427928, 10435676, 10498383, 10362596, 10559261, 10498379, 10471844, 10380341, 10407126, 10579925	0.0496212
E12.5 ♂ germ cell enriched
Category	Term	Transcript cluster IDs	p-value
BP	anterior/posterior axis specification	10352314, 10597268, 10389283	0.00593876
BP	regionalization	10352314, 10419261, 10599812, 10597268, 10419356, 10389283	0.00743016
BP	gastrulation	10352314, 10419261, 10597268, 10389283	0.0127644
BP	anterior/posterior pattern formation	10352314, 10599812, 10597268, 10419356, 10389283	0.0144891
BP	axis specification	10352314, 10597268, 10389283	0.0166877
MF	growth factor activity	10352314, 10419261, 10352302, 10597268	0.0171817
BP	tRNA 5'-leader removal	10423629, 10408666	0.0180743
BP	RNA processing	10423629, 10411432, 10527455, 10485989, 10478967, 10535329, 10449575, 10408666, 10388971	0.0228869
BP	pattern specification process	10352314, 10419261, 10599812, 10597268, 10419356, 10389283	0.0264715
BP	regulation of transcription, DNA-dependent	10561831, 10413393, 10419261, 10395457, 10442052, 10532999, 10457323, 10599812, 10597268, 10389786, 10419356, 10487433, 10376060, 10389283, 10549899	0.036627
BP	dorsal/ventral pattern formation	10419261, 10419356, 10389283	0.0419667
MF	sequence-specific DNA binding	10413393, 10457323, 10395457, 10389786, 10419356, 10376060, 10389283	0.0423535
BP	regulation of RNA metabolic process	10561831, 10413393, 10419261, 10395457, 10442052, 10532999, 10457323, 10599812, 10597268, 10389786, 10419356, 10487433, 10376060, 10389283, 10549899	0.042803
E12.5 ♂ germ cell depleted
Category	Term	Transcript cluster IDs	p-value
BP	apoptosis	10485562, 10423498, 10602840, 10496023, 10467041, 10502299, 10375667, 10372745, 10366346	0.0136734
BP	programmed cell death	10485562, 10423498, 10602840, 10496023, 10467041, 10502299, 10375667, 10372745, 10366346	0.0143547
BP	negative regulation of transcription, DNA-dependent	10485562, 10399691, 10404774, 10393614, 10502299, 10509163, 10569429	0.0164615
BP	negative regulation of RNA metabolic process	10485562, 10399691, 10404774, 10393614, 10502299, 10509163, 10569429	0.0171407
BP	cell death	10485562, 10423498, 10602840, 10496023, 10467041, 10502299, 10375667, 10372745, 10366346	0.0189769
BP	death	10485562, 10423498, 10602840, 10496023, 10467041, 10502299, 10375667, 10372745, 10366346	0.0213429
MF	protein domain specific binding	10603708, 10602840, 10575497, 10586844, 10509163	0.0345773
MF	phospholipid binding	10385966, 10365933, 10564713, 10566877	0.0351951
BP	cell projection organization	10600936, 10412844, 10386789, 10575497, 10378549, 10359422	0.0364883
BP	negative regulation of transcription	10485562, 10399691, 10404774, 10393614, 10502299, 10509163, 10569429	0.0396991
BP	neuron differentiation	10600936, 10412844, 10386789, 10378549, 10509163, 10569429	0.0475414
E12.5 ♀ germ cell enriched
Category	Term	Transcript cluster IDs	p-value
MF	vitamin binding	10376074, 10480155, 10585438, 10466976, 10479902	0.00518544
BP	microtubule-based process	10415911, 10607806, 10355806, 10443598, 10601011, 10403604	0.0150689
BP	hexose metabolic process	10606102, 10602385, 10357535, 10602925, 10479902	0.0232671
BP	microtubule-based movement	10415911, 10355806, 10443598, 10601011	0.0243726
BP	cellular amino acid catabolic process	10409265, 10466976, 10458828	0.0266613
BP	oogenesis	10377662, 10537231, 10591418	0.0266613
MF	6-phosphofructo-2-kinase activity	10602385, 10357535	0.0274584
BP	fructose 2,6-bisphosphate metabolic process	10602385, 10357535	0.0281527
BP	monosaccharide metabolic process	10606102, 10602385, 10357535, 10602925, 10479902	0.0311911
MF	fructose-2,6-bisphosphate 2-phosphatase activity	10602385, 10357535	0.0364451
MF	motor activity	10415911, 10443598, 10601011, 10587150	0.0385775
BP	amine catabolic process	10409265, 10466976, 10458828	0.0386779
E12.5 ♀ germ cell depleted
Category	Term	Transcript cluster IDs	p-value
BP	lipid catabolic process	10507784, 10467139, 10428619	0.0150068
E13.5 ♂+♀ germ cell enriched
Category	Term	Transcript cluster IDs	p-value
BP	DNA metabolic process	10459655, 10534974, 10344939, 10438378, 10397719, 10546163, 10409396, 10425632, 10352242, 10565862, 10348932, 10404941, 10528340, 10585625, 10435581, 10543471, 10386844, 10433278, 10389627, 10605954, 10433797, 10540738, 10423068, 10546834, 10500445, 10354845, 10447417, 10421325, 10546031, 10367122, 10549057, 10480224, 10359801, 10448975, 10476362, 10531776, 10557528, 10592942, 10465005, 10515257,…	2.94318e-09
MF	helicase activity	10534974, 10500630, 10369586, 10425632, 10500445, 10581737, 10532407, 10412155, 10462752, 10549057, 10510725, 10357391, 10592140, 10478825, 10352558, 10606071, 10426118, 10435581, 10363575, 10515257, 10398759, 10593508	1.89652e-08
BP	chromosome organization	10491385, 10344939, 10352767, 10421526, 10483584, 10546163, 10425559, 10409396, 10452701, 10354777, 10352242, 10538832, 10404941, 10510725, 10346365, 10452658, 10543471, 10388234, 10436708, 10528723, 10389627, 10605954, 10433797, 10540738, 10500445, 10523822, 10532407, 10367122, 10577222, 10409557, 10565089, 10359801, 10391221, 10472782, 10531776, 10592942, 10601192, 10515257	8.39153e-08
MF	nucleoside binding	10520304, 10352767, 10546163, 10425632, 10452701, 10581737, 10437023, 10524266, 10374564, 10350297, 10510725, 10380025, 10463211, 10542677, 10467230, 10452658, 10500630, 10569458, 10369586, 10500445, 10447417, 10577492, 10532407, 10491780, 10415911, 10555118, 10555550, 10476362, 10360631, 10357454, 10368935, 10587508, 10476033, 10515257, 10515943, 10534974, 10491385, 10491486, 10449471, 10393955,…	1.55513e-06
MF	adenyl nucleotide binding	10520304, 10352767, 10546163, 10425632, 10452701, 10581737, 10437023, 10524266, 10374564, 10350297, 10510725, 10380025, 10463211, 10542677, 10467230, 10452658, 10500630, 10569458, 10369586, 10500445, 10447417, 10577492, 10532407, 10491780, 10415911, 10555118, 10555550, 10476362, 10360631, 10357454, 10368935, 10587508, 10476033, 10515257, 10515943, 10534974, 10491385, 10491486, 10449471, 10393955,…	1.9433e-06
MF	ATP binding	10520304, 10352767, 10546163, 10425632, 10452701, 10581737, 10437023, 10524266, 10374564, 10350297, 10510725, 10380025, 10463211, 10542677, 10467230, 10452658, 10500630, 10569458, 10369586, 10500445, 10447417, 10577492, 10532407, 10491780, 10415911, 10555118, 10555550, 10476362, 10360631, 10368935, 10587508, 10357454, 10476033, 10515257, 10515943, 10534974, 10491385, 10491486, 10449471, 10412155,…	2.35699e-06
MF	purine nucleoside binding	10520304, 10352767, 10546163, 10425632, 10452701, 10581737, 10437023, 10524266, 10374564, 10350297, 10510725, 10380025, 10463211, 10542677, 10467230, 10452658, 10500630, 10569458, 10369586, 10500445, 10447417, 10577492, 10532407, 10491780, 10415911, 10555118, 10555550, 10476362, 10360631, 10357454, 10368935, 10587508, 10476033, 10515257, 10515943, 10534974, 10491385, 10491486, 10449471, 10393955,…	2.58592e-06
MF	adenyl ribonucleotide binding	10520304, 10352767, 10546163, 10425632, 10452701, 10581737, 10437023, 10524266, 10374564, 10350297, 10510725, 10380025, 10463211, 10542677, 10467230, 10452658, 10500630, 10569458, 10369586, 10500445, 10447417, 10577492, 10532407, 10491780, 10415911, 10555118, 10555550, 10476362, 10360631, 10368935, 10587508, 10357454, 10476033, 10515257, 10515943, 10534974, 10491385, 10491486, 10449471, 10412155,…	3.14955e-06
BP	sexual reproduction	10486819, 10415472, 10490304, 10404941, 10356886, 10592140, 10426118, 10539933, 10504672, 10451721, 10478875, 10490502, 10389627, 10533504, 10433797, 10605954, 10546834, 10540738, 10506004, 10454306, 10421325, 10543259, 10359801, 10352558, 10510305, 10592336	1.15189e-05
BP	mRNA transport	10361651, 10373964, 10582599, 10420572, 10385052, 10592140, 10574033, 10387992, 10546294, 10491182, 10372687, 10473650	2.17237e-05
BP	cell cycle phase	10344939, 10595529, 10421029, 10352767, 10421526, 10428150, 10538832, 10490304, 10528340, 10400589, 10594426, 10346365, 10585625, 10594774, 10436708, 10361651, 10427166, 10389627, 10605954, 10540738, 10577492, 10487480, 10421325, 10565089, 10413640, 10359801, 10462866, 10515744, 10606071	2.54105e-05
MF	nucleotide binding	10520304, 10352767, 10383671, 10581737, 10374564, 10510725, 10380025, 10463211, 10467230, 10500630, 10569458, 10500445, 10362581, 10532407, 10568217, 10491780, 10555118, 10415911, 10555550, 10360631, 10587508, 10491486, 10361682, 10551971, 10404941, 10539933, 10373157, 10523012, 10441797, 10435581, 10384373, 10398759, 10389627, 10520650, 10500218, 10538222, 10587266, 10462752, 10347748, 10413640,…	2.91446e-05
BP	M phase	10344939, 10595529, 10421029, 10352767, 10428150, 10538832, 10490304, 10400589, 10594426, 10346365, 10594774, 10436708, 10361651, 10427166, 10389627, 10605954, 10540738, 10577492, 10487480, 10421325, 10565089, 10413640, 10359801, 10462866, 10515744, 10606071	3.8269e-05
BP	establishment of RNA localization	10361651, 10373964, 10582599, 10420572, 10385052, 10592140, 10574033, 10387992, 10546294, 10491182, 10372687, 10473650	4.12933e-05
BP	nucleic acid transport	10361651, 10373964, 10582599, 10420572, 10385052, 10592140, 10574033, 10387992, 10546294, 10491182, 10372687, 10473650	4.12933e-05
BP	RNA transport	10361651, 10373964, 10582599, 10420572, 10385052, 10592140, 10574033, 10387992, 10546294, 10491182, 10372687, 10473650	4.12933e-05
BP	RNA localization	10361651, 10373964, 10582599, 10420572, 10385052, 10592140, 10574033, 10387992, 10546294, 10491182, 10372687, 10473650	4.80741e-05
BP	gamete generation	10490502, 10486819, 10389627, 10533504, 10415472, 10433797, 10546834, 10540738, 10506004, 10454306, 10421325, 10543259, 10404941, 10356886, 10359801, 10592140, 10352558, 10426118, 10539933, 10504672, 10510305, 10451721, 10478875	5.86493e-05
BP	nucleobase, nucleoside, nucleotide and nucleic acid transport	10361651, 10373964, 10582599, 10420572, 10385052, 10592140, 10574033, 10387992, 10546294, 10491182, 10372687, 10473650	6.45473e-05
BP	cell cycle process	10344939, 10595529, 10421029, 10352767, 10421526, 10428150, 10538832, 10490304, 10528340, 10400589, 10594426, 10346365, 10585625, 10594774, 10436708, 10361651, 10427166, 10389627, 10605954, 10540738, 10476819, 10577492, 10487480, 10421325, 10565089, 10413640, 10359801, 10462866, 10515744, 10606071, 10565570	8.05418e-05
MF	purine nucleotide binding	10520304, 10352767, 10546163, 10383671, 10425632, 10452701, 10581737, 10437023, 10524266, 10374564, 10350297, 10510725, 10380025, 10463211, 10542677, 10467230, 10452658, 10500630, 10525387, 10569458, 10369586, 10500445, 10447417, 10362581, 10577492, 10532407, 10491780, 10415911, 10555118, 10555550, 10476362, 10546104, 10360631, 10588283, 10357454, 10368935, 10587508, 10476033, 10515257, 10515943,…	8.28745e-05
MF	purine ribonucleotide binding	10520304, 10352767, 10546163, 10383671, 10425632, 10452701, 10581737, 10437023, 10524266, 10374564, 10350297, 10510725, 10380025, 10463211, 10542677, 10467230, 10452658, 10500630, 10525387, 10569458, 10369586, 10500445, 10447417, 10362581, 10577492, 10532407, 10491780, 10415911, 10555118, 10555550, 10476362, 10546104, 10360631, 10588283, 10357454, 10368935, 10587508, 10476033, 10515257, 10515943,…	0.000131164
MF	ribonucleotide binding	10520304, 10352767, 10546163, 10383671, 10425632, 10452701, 10581737, 10437023, 10524266, 10374564, 10350297, 10510725, 10380025, 10463211, 10542677, 10467230, 10452658, 10500630, 10525387, 10569458, 10369586, 10500445, 10447417, 10362581, 10577492, 10532407, 10491780, 10415911, 10555118, 10555550, 10476362, 10546104, 10360631, 10588283, 10357454, 10368935, 10587508, 10476033, 10515257, 10515943,…	0.000131164
BP	cell cycle	10595529, 10344939, 10534974, 10438378, 10421029, 10352767, 10421526, 10428150, 10546163, 10581111, 10538832, 10490304, 10524266, 10528340, 10400589, 10346365, 10594426, 10585625, 10594774, 10388234, 10436708, 10361651, 10389627, 10427166, 10605954, 10540738, 10476819, 10577492, 10487480, 10421325, 10582231, 10565089, 10413640, 10359801, 10448975, 10462866, 10515744, 10476362, 10606071, 10565570,…	0.000145723
BP	DNA replication	10459655, 10433278, 10534974, 10344939, 10438378, 10546163, 10354845, 10565862, 10528340, 10448975, 10476362, 10557528, 10585625, 10435581, 10543471, 10363575	0.000234927
BP	chromatin modification	10528723, 10491385, 10421526, 10483584, 10425559, 10409396, 10500445, 10354777, 10523822, 10532407, 10367122, 10577222, 10409557, 10404941, 10391221, 10472782, 10531776, 10592942, 10601192, 10388234, 10436708	0.000276676
MF	DNA binding	10459655, 10520445, 10546163, 10571288, 10387588, 10493317, 10425632, 10354777, 10523955, 10394942, 10528340, 10510725, 10599812, 10463121, 10585625, 10543471, 10528723, 10606315, 10500630, 10452213, 10369586, 10474312, 10500445, 10447417, 10419296, 10532407, 10487564, 10367122, 10359801, 10480224, 10476362, 10528238, 10559766, 10465005, 10396442, 10515257, 10534974, 10344939, 10591726, 10421526,…	0.000301969
BP	histone modification	10528723, 10491385, 10391221, 10472782, 10483584, 10409396, 10532407, 10601192, 10367122, 10436708, 10577222, 10404941	0.00037793
BP	covalent chromatin modification	10528723, 10491385, 10391221, 10472782, 10483584, 10409396, 10532407, 10601192, 10367122, 10436708, 10577222, 10404941	0.00057925
MF	ATP-dependent helicase activity	10549057, 10500630, 10592140, 10510725, 10478825, 10352558, 10425632, 10581737, 10412155, 10435581, 10363575, 10593508	0.000680405
MF	purine NTP-dependent helicase activity	10549057, 10500630, 10592140, 10510725, 10478825, 10352558, 10425632, 10581737, 10412155, 10435581, 10363575, 10593508	0.000680405
BP	ncRNA metabolic process	10400975, 10529425, 10569458, 10539574, 10500218, 10590549, 10352735, 10393955, 10421325, 10507557, 10359801, 10480224, 10389842, 10454606, 10373157, 10443836, 10357454, 10376959, 10600485	0.000699616
BP	reproductive cellular process	10415472, 10433797, 10506004, 10495111, 10421325, 10543259, 10404941, 10455656, 10359801, 10592140, 10504672, 10510305, 10451721, 10592336	0.000732729
BP	chromatin organization	10528723, 10491385, 10421526, 10546163, 10483584, 10425559, 10409396, 10500445, 10354777, 10523822, 10532407, 10367122, 10577222, 10409557, 10404941, 10391221, 10510725, 10472782, 10531776, 10592942, 10601192, 10388234, 10436708	0.000761863
BP	multicellular organism reproduction	10490502, 10486819, 10389627, 10533504, 10415472, 10433797, 10546834, 10540738, 10506004, 10454306, 10421325, 10543259, 10404941, 10356886, 10359801, 10592140, 10352558, 10426118, 10539933, 10504672, 10510305, 10451721, 10478875	0.000802893
BP	reproductive process in a multicellular organism	10490502, 10486819, 10389627, 10533504, 10415472, 10433797, 10546834, 10540738, 10506004, 10454306, 10421325, 10543259, 10404941, 10356886, 10359801, 10592140, 10352558, 10426118, 10539933, 10504672, 10510305, 10451721, 10478875	0.000802893
BP	male gamete generation	10490502, 10486819, 10389627, 10533504, 10415472, 10546834, 10506004, 10454306, 10421325, 10356886, 10359801, 10592140, 10352558, 10426118, 10539933, 10451721, 10478875	0.000869584
BP	spermatogenesis	10490502, 10486819, 10389627, 10533504, 10415472, 10546834, 10506004, 10454306, 10421325, 10356886, 10359801, 10592140, 10352558, 10426118, 10539933, 10451721, 10478875	0.000869584
BP	meiosis	10389627, 10359801, 10427166, 10352767, 10605954, 10428150, 10540738, 10346365, 10421325, 10565089, 10490304	0.000887134
BP	M phase of meiotic cell cycle	10389627, 10359801, 10427166, 10352767, 10605954, 10428150, 10540738, 10346365, 10421325, 10565089, 10490304	0.000887134
BP	DNA methylation	10359801, 10480224, 10592942, 10421325, 10367122, 10404941	0.00103617
BP	DNA alkylation	10359801, 10480224, 10592942, 10421325, 10367122, 10404941	0.00103617
BP	DNA modification	10359801, 10480224, 10592942, 10421325, 10367122, 10404941	0.00103617
BP	meiotic cell cycle	10389627, 10359801, 10427166, 10352767, 10605954, 10428150, 10540738, 10346365, 10421325, 10565089, 10490304	0.00109228
MF	ATPase activity	10500630, 10491486, 10528648, 10389627, 10425632, 10500445, 10581737, 10412155, 10423805, 10428763, 10355742, 10549057, 10344637, 10510725, 10592140, 10478825, 10352558, 10435581, 10363575, 10593508	0.0012136
BP	meiosis I	10389627, 10359801, 10427166, 10605954, 10540738, 10421325, 10565089	0.00138348
BP	methylation	10528723, 10359801, 10480224, 10592942, 10572962, 10453544, 10421325, 10367122, 10577222, 10404941	0.0020637
MF	ATPase activity, coupled	10500630, 10491486, 10389627, 10425632, 10581737, 10412155, 10423805, 10355742, 10549057, 10344637, 10510725, 10592140, 10478825, 10352558, 10435581, 10363575, 10593508	0.00241889
BP	regulation of gene expression, epigenetic	10359801, 10480224, 10472782, 10592942, 10452701, 10452658, 10421325, 10367122, 10409557, 10404941	0.0028712
BP	DNA recombination	10549057, 10389627, 10433797, 10605954, 10425632, 10447417, 10465005, 10515257, 10386844	0.00353559
BP	biopolymer methylation	10528723, 10359801, 10480224, 10592942, 10572962, 10421325, 10367122, 10577222, 10404941	0.00353559
BP	chromosome segregation	10361651, 10389627, 10427166, 10449471, 10352767, 10605954, 10346365, 10538832, 10507557	0.00353559
BP	response to DNA damage stimulus	10459655, 10397719, 10413853, 10433797, 10546834, 10423068, 10540738, 10409396, 10500445, 10425632, 10447417, 10352242, 10546031, 10582231, 10524266, 10531776, 10564869, 10435581, 10386844, 10363575, 10515257	0.00368585
BP	RNA processing	10400975, 10492456, 10449471, 10352735, 10393955, 10551971, 10373964, 10444595, 10389842, 10579703, 10581674, 10376959, 10600485, 10529425, 10500630, 10386125, 10539574, 10590549, 10536595, 10421325, 10507557, 10565089, 10572449, 10375031, 10480224, 10500253, 10454606, 10443836	0.00429417
BP	mitotic cell cycle	10361651, 10595529, 10344939, 10421029, 10352767, 10421526, 10577492, 10487480, 10538832, 10413640, 10528340, 10462866, 10400589, 10515744, 10606071, 10594426, 10585625, 10594774, 10436708	0.00487637
BP	nuclear division	10595529, 10344939, 10361651, 10421029, 10352767, 10577492, 10487480, 10538832, 10413640, 10462866, 10400589, 10515744, 10606071, 10594426, 10594774, 10436708	0.00584469
BP	mitosis	10595529, 10344939, 10361651, 10421029, 10352767, 10577492, 10487480, 10538832, 10413640, 10462866, 10400589, 10515744, 10606071, 10594426, 10594774, 10436708	0.00584469
MF	histone binding	10409396, 10523822, 10367122, 10436708, 10577222	0.0059729
BP	meiotic chromosome segregation	10389627, 10427166, 10605954, 10346365	0.00656956
BP	M phase of mitotic cell cycle	10595529, 10344939, 10361651, 10421029, 10352767, 10577492, 10487480, 10538832, 10413640, 10462866, 10400589, 10515744, 10606071, 10594426, 10594774, 10436708	0.00680845
BP	DNA repair	10459655, 10397719, 10433797, 10423068, 10540738, 10546834, 10409396, 10500445, 10425632, 10447417, 10352242, 10546031, 10531776, 10435581, 10363575, 10515257, 10386844	0.0070608
BP	organelle fission	10595529, 10344939, 10361651, 10421029, 10352767, 10577492, 10487480, 10538832, 10413640, 10462866, 10400589, 10515744, 10606071, 10594426, 10594774, 10436708	0.00751902
BP	histone acetylation	10491385, 10391221, 10472782, 10483584, 10532407, 10601192	0.00785691
BP	cell division	10361651, 10595529, 10344939, 10438378, 10421029, 10352767, 10421526, 10577492, 10487480, 10538832, 10490304, 10413640, 10462866, 10400589, 10515744, 10606071, 10594426, 10346365, 10594774, 10436708	0.00824848
BP	protein amino acid acetylation	10491385, 10391221, 10472782, 10483584, 10532407, 10601192	0.00900723
BP	transcription, DNA-dependent	10522716, 10454077, 10394942, 10606315, 10500630, 10452213, 10539574, 10571288, 10387588, 10373157, 10601192	0.00923858
BP	RNA biosynthetic process	10522716, 10454077, 10394942, 10606315, 10500630, 10452213, 10539574, 10571288, 10387588, 10373157, 10601192	0.0119304
BP	one-carbon metabolic process	10528723, 10359801, 10480224, 10592942, 10572962, 10453544, 10421325, 10367122, 10577222, 10404941	0.0126177
MF	RNA binding	10348521, 10361682, 10551971, 10373964, 10591357, 10592140, 10518774, 10444595, 10382935, 10579703, 10373157, 10451721, 10426827, 10600485, 10529425, 10582823, 10386125, 10569458, 10590549, 10536595, 10494043, 10491182, 10421325, 10367122, 10565089, 10572449, 10475830, 10480224, 10352558, 10520815, 10546104, 10455312, 10530045, 10593508	0.0140395
MF	deoxyribonuclease activity	10389627, 10423068, 10546031, 10363575	0.0155759
BP	ncRNA processing	10400975, 10529425, 10539574, 10352735, 10590549, 10393955, 10507557, 10480224, 10389842, 10454606, 10443836, 10376959, 10600485	0.0162816
BP	ribosome biogenesis	10529425, 10492598, 10389842, 10454606, 10539574, 10436428, 10443836, 10590549, 10600485, 10507557	0.0196418
BP	nuclear export	10582599, 10592140, 10492598, 10567797, 10473650	0.0201692
BP	protein amino acid acylation	10491385, 10391221, 10472782, 10483584, 10532407, 10601192	0.0204251
BP	double-strand break repair	10433797, 10531776, 10409396, 10425632, 10546031, 10515257	0.0204251
BP	protein complex assembly	10606315, 10452213, 10571288, 10362581, 10567797, 10568217, 10543259, 10454077, 10555118, 10458430, 10385052, 10601192, 10354979, 10436708	0.0209487
BP	protein complex biogenesis	10606315, 10452213, 10571288, 10362581, 10567797, 10568217, 10543259, 10454077, 10555118, 10458430, 10385052, 10601192, 10354979, 10436708	0.0209487
BP	rRNA processing	10529425, 10389842, 10454606, 10539574, 10443836, 10590549, 10600485, 10507557	0.0220839
BP	rRNA metabolic process	10529425, 10389842, 10454606, 10539574, 10443836, 10590549, 10600485, 10507557	0.02371
BP	ribonucleoprotein complex biogenesis	10529425, 10444595, 10492598, 10389842, 10454606, 10539574, 10436428, 10443836, 10590549, 10600485, 10507557	0.0261264
BP	transmembrane transport	10361651, 10486819, 10582599, 10420572, 10546346, 10561388, 10387992, 10491182, 10423805, 10372687, 10355742, 10344637, 10385052, 10574033, 10546294, 10495035, 10547641, 10473650	0.0262805
BP	peptide metabolic process	10495763, 10364955, 10539933, 10587266, 10467230	0.0291284
BP	response to ionizing radiation	10524266, 10433797, 10531776, 10409396, 10425632, 10515257	0.0299383
BP	synapsis	10359801, 10605954, 10540738, 10565089	0.0301276
BP	chromosome organization involved in meiosis	10359801, 10605954, 10540738, 10565089	0.0301276
BP	DNA methylation during gametogenesis	10359801, 10421325, 10404941	0.0305767
BP	transcription initiation	10454077, 10606315, 10452213, 10571288, 10601192	0.0325616
MF	3'-5' exonuclease activity	10423068, 10590549, 10546031, 10396867	0.0327021
MF	Ras GTPase binding	10458430, 10385052, 10423855, 10593668, 10354979, 10497520	0.0367647
BP	male meiosis	10389627, 10359801, 10605954, 10490304	0.0404378
MF	small GTPase binding	10458430, 10385052, 10423855, 10593668, 10354979, 10497520	0.0433751
MF	heat shock protein binding	10433278, 10528340, 10596231, 10532504, 10520445, 10506989, 10596271, 10596281, 10596273	0.0433751
MF	tRNA binding	10569458, 10546104, 10373157, 10530045	0.0438099
BP	fertilization	10486819, 10359801, 10605954, 10592336, 10490304	0.0442253
BP	macromolecular complex assembly	10606315, 10452213, 10546163, 10571288, 10362581, 10567797, 10568217, 10543259, 10409557, 10454077, 10458430, 10555118, 10385052, 10444595, 10601192, 10354979, 10436708	0.0459596
BP	positive regulation of protein complex assembly	10422781, 10506989, 10510305, 10543259	0.0461762
BP	telomere maintenance	10344939, 10433797, 10352242, 10543471	0.0461762
BP	DNA-dependent DNA replication	10433278, 10534974, 10438378, 10546163, 10363575	0.0485692
BP	cell cycle checkpoint	10531776, 10594426, 10409396, 10456488, 10456439, 10538832, 10582231	0.0487451
BP	macromolecular complex subunit organization	10606315, 10500630, 10452213, 10546163, 10571288, 10362581, 10567797, 10568217, 10543259, 10409557, 10454077, 10458430, 10555118, 10385052, 10444595, 10601192, 10354979, 10436708	0.0491386
E13.5 ♂+♀ germ cell depleted
Category	Term	Transcript cluster IDs	p-value
MF	transcription factor activity	10604393, 10560481, 10504349, 10482448, 10506031, 10571705, 10371959, 10454782, 10564527, 10359870, 10506050, 10474295, 10552874, 10470182, 10514466, 10564451, 10594404, 10427035, 10381006, 10405853, 10374035, 10569972, 10403352, 10424400, 10600707, 10399725, 10436734, 10384504, 10460057, 10453678, 10437160, 10428536, 10453857, 10416522, 10402063	0.00019245
MF	sequence-specific DNA binding	10604393, 10560481, 10424400, 10504349, 10482448, 10371959, 10564527, 10359870, 10474295, 10514466, 10564451, 10399725, 10384504, 10436734, 10460057, 10453678, 10381006, 10427035, 10437160, 10453857, 10428536, 10402063, 10569972, 10374035	0.00122918
BP	striated muscle tissue development	10594661, 10380896, 10411229, 10412562, 10377319, 10582712, 10453857, 10379262, 10423902, 10564527, 10492310	0.00126562
BP	positive regulation of transcription from RNA polymerase II promoter	10403352, 10604393, 10424400, 10506031, 10501586, 10423902, 10454782, 10359870, 10506050, 10474295, 10552874, 10514466, 10399725, 10594404, 10464084, 10541895, 10453678, 10381006, 10498284, 10427035, 10453857	0.00143452
BP	regulation of protein amino acid phosphorylation	10346651, 10559261, 10357043, 10514466, 10380477, 10482448, 10579925, 10449303, 10447294, 10366052	0.00145057
BP	positive regulation of molecular function	10357043, 10424400, 10500813, 10482448, 10501586, 10360205, 10449303, 10382300, 10365971, 10559261, 10369210, 10411229, 10380341, 10579925, 10379262, 10485466, 10366052	0.00167478
BP	wound healing	10403352, 10411229, 10398267, 10462507, 10377319, 10543944, 10371959, 10365482, 10379262	0.00196931
BP	response to wounding	10403352, 10357043, 10344966, 10371959, 10559261, 10411229, 10398267, 10541895, 10462507, 10543944, 10377319, 10467068, 10365482, 10379262, 10415844	0.00221352
BP	muscle tissue development	10594661, 10380896, 10411229, 10412562, 10377319, 10582712, 10453857, 10379262, 10423902, 10564527, 10492310	0.00229813
BP	regulation of transcription from RNA polymerase II promoter	10604393, 10500813, 10506031, 10436830, 10423902, 10564527, 10454782, 10359870, 10506050, 10474295, 10552874, 10514466, 10594404, 10464084, 10541895, 10427035, 10381006, 10403352, 10445071, 10424400, 10501586, 10365136, 10475625, 10600707, 10421269, 10399725, 10384504, 10453678, 10498284, 10453857	0.00245367
BP	positive regulation of catalytic activity	10357043, 10424400, 10482448, 10501586, 10360205, 10449303, 10382300, 10365971, 10559261, 10369210, 10411229, 10380341, 10579925, 10379262, 10366052	0.00248909
BP	phosphate metabolic process	10357579, 10502732, 10399470, 10558515, 10500813, 10499811, 10443021, 10513957, 10483856, 10382300, 10388682, 10411782, 10384885, 10380896, 10411229, 10410099, 10358259, 10352661, 10381187, 10404506, 10447294, 10346651, 10357043, 10501629, 10452980, 10427928, 10545001, 10449284, 10523468, 10350742, 10559261, 10471844, 10380341, 10407126, 10561104, 10579925, 10372745, 10497285	0.00297176
BP	phosphorus metabolic process	10357579, 10502732, 10399470, 10558515, 10500813, 10499811, 10443021, 10513957, 10483856, 10382300, 10388682, 10411782, 10384885, 10380896, 10411229, 10410099, 10358259, 10352661, 10381187, 10404506, 10447294, 10346651, 10357043, 10501629, 10452980, 10427928, 10545001, 10449284, 10523468, 10350742, 10559261, 10471844, 10380341, 10407126, 10561104, 10579925, 10372745, 10497285	0.00297176
BP	muscle organ development	10594661, 10380896, 10411229, 10431585, 10412562, 10377319, 10582712, 10453857, 10379262, 10423902, 10564527, 10492310	0.00358242
BP	regulation of cell-substrate adhesion	10411782, 10357043, 10403584, 10379262, 10502655, 10415052	0.00393258
BP	chordate embryonic development	10594661, 10482448, 10423902, 10422728, 10360806, 10346564, 10359870, 10446376, 10594404, 10521222, 10464084, 10453678, 10377319, 10523727, 10582712, 10381187, 10453857, 10579925, 10379262, 10502655, 10363265, 10345442, 10492310	0.00393733
BP	positive regulation of pigment cell differentiation	10357043, 10546452, 10366052	0.00404233
BP	positive regulation of melanocyte differentiation	10357043, 10546452, 10366052	0.00404233
BP	embryonic development ending in birth or egg hatching	10594661, 10482448, 10423902, 10422728, 10360806, 10346564, 10359870, 10446376, 10594404, 10521222, 10464084, 10453678, 10377319, 10523727, 10582712, 10381187, 10453857, 10579925, 10379262, 10502655, 10363265, 10345442, 10492310	0.0043769
BP	regulation of phosphorylation	10346651, 10357043, 10380477, 10399470, 10418702, 10482448, 10449303, 10382300, 10559261, 10514466, 10411229, 10380341, 10579925, 10379262, 10447294, 10366052	0.00474108
BP	regulation of cell-matrix adhesion	10411782, 10357043, 10379262, 10415052	0.00504365
BP	regulation of MAP kinase activity	10382300, 10559261, 10399470, 10380341, 10482448, 10579925, 10379262, 10366052	0.00656437
BP	regulation of phosphorus metabolic process	10346651, 10357043, 10380477, 10399470, 10418702, 10482448, 10449303, 10382300, 10559261, 10514466, 10411229, 10380341, 10579925, 10379262, 10447294, 10366052	0.00723142
BP	regulation of phosphate metabolic process	10346651, 10357043, 10380477, 10399470, 10418702, 10482448, 10449303, 10382300, 10559261, 10514466, 10411229, 10380341, 10579925, 10379262, 10447294, 10366052	0.00723142
BP	regulation of cell adhesion	10411782, 10357043, 10403584, 10501586, 10362538, 10379262, 10502655, 10415052	0.00784962
BP	positive regulation of pigmentation during development	10357043, 10546452, 10366052	0.00788597
BP	glomerulus development	10357043, 10498284, 10403584	0.00788597
BP	kidney development	10359870, 10474295, 10357043, 10545958, 10498284, 10403584, 10523727, 10440522, 10379262	0.00819198
BP	positive regulation of transcription, DNA-dependent	10403352, 10604393, 10424400, 10506031, 10501586, 10423902, 10454782, 10359870, 10506050, 10474295, 10552874, 10514466, 10399725, 10594404, 10464084, 10541895, 10453678, 10381006, 10498284, 10427035, 10453857	0.00850005
MF	transcription regulator activity	10604393, 10560481, 10500813, 10504349, 10482448, 10506031, 10571705, 10371959, 10423902, 10454782, 10564527, 10359870, 10506050, 10474295, 10470182, 10552874, 10514466, 10564451, 10594404, 10427035, 10381006, 10381187, 10405853, 10516706, 10374035, 10569972, 10403352, 10357043, 10424400, 10385572, 10529875, 10365136, 10475625, 10600707, 10399725, 10436734, 10384504, 10460057, 10453678, 10498284,…	0.00861746
[truncated: 549 more rows]
