# Supplementary material for: Temporal Transcriptional Profiling of Somatic and Germ Cells Reveals Biased Lineage Priming of Sexual Fate in the Fetal Mouse Gonad
Source: PLoS Genet. 2012 Mar 15;8(3):e1002575. doi: 10.1371/journal.pgen.1002575 (PMC3305395; doi:10.1371/journal.pgen.1002575)
Supplement: Dataset S3 — Lists of sexually dimorphic genes, overlapping expression, and permutation tests. (A) Gene lists generated by a single pairwise comparison between XY and XX cells of a lineage graphically illustrated in Figure S4A. Lists of all sexually dimorphic genes in each lineage at each stage are provided first, followed by lists of genes sexually dimorphic in multiple lineages. Genes are in alphabetical order. The gene lists are arranged by stage, sex, and lineage. When transcript clusters for a single gene behaved differently, in all cases the gene was counted in the highest overlapping category. For example, if a gene had one transcript cluster sexually dimorphic in only one lineage and another that was dimorphic in two lineages, it was counted as being dimorphic in both lineages. “§” next to a gene name indicates the gene was counted as “♀ E13.5 over-expressed in all cell types” (the triple overlap in the Venn diagram in Figure S4A) even though it appeared in other categories (Syngap1 and Myo9a). (B) Results of permutation tests for the single pairwise comparisons. (C) Lists of genes that were sexually dimorphic in only two lineages, expressed identically in both lineages, and enriched in these two lineages compared to the remaining two lineages (Figure S4E). Genes are in alphabetical order. The gene lists are arranged by lineage, sex, and stage. The gene considered in the triple overlap (Syngap1) is again marked by the § and removed from the analysis. (XLSX) [file pgen.1002575.s003.xlsx]

## Sheet: (A) Gene lists
♂ E11.5 over-expressed
Supporting		Interstitium		Germ
Transcript cluster ID	Gene name	Transcript cluster ID	Gene name	Transcript cluster ID	Gene name
10401667	0610007P14Rik	10575775	4933407C03Rik	10354792	1110034B05Rik
10442270	1300003B13Rik	10424082	Aard	10409990	6720489N17Rik
10354275	1700029F09Rik	10410477	Adamts16	10495651	Alg14
10537292	1810058I24Rik	10546430	Adamts9	10359982	Atf6
10459071	2010002N04Rik	10546432	Adamts9	10608138	Ddx3y
10508996	2610002D18Rik	10546434	Adamts9	10591614	Dock6
10571911	2700029M09Rik	10540207	Adamts9	10399882	Dus4l
10484425	2700094K13Rik	10505132	Akap2	10559179	E330027M22Rik
10400896	2810055F11Rik	10490097	Cbln4	10608001	Eif2s3y
10436590	2810055G20Rik	10402708	Ckb	10480414	Enkur
10397230	2900006K08Rik	10364824	Csnk1g2	10526055	Gbas
10555576	3200002M19Rik	10608138	Ddx3y	10494288	Golph3l
10419416	3632451O06Rik	10608001	Eif2s3y	10555059	Kctd14
10405263	4732471D19Rik	10438626	Etv5	10607972	Kdm5d
10575578	4930402E16Rik	10383556	Fn3krp	10446771	Lclat1
10487748	4930402H24Rik	10585398	Gldn	10376263	Mfap3
10562368	4931406P16Rik	10453759	Gm10554	10492720	Mtap9
10419082	5730469M10Rik	10543466	Gpr37	10433197	Olfr161
10457888	5730494M16Rik	10501229	Gstm1	10469046	Phyh
10601848	6530401D17Rik	10501222	Gstm2	10514221	Plin2
10586130	Aagab	10501199	Gstm7	10423742	Polr2k
10424082	Aard	10358605	Hmcn1	10462535	Pten
10519527	Abcb1a	10358635	Hmcn1	10513152	Ptpn3
10501832	Abcd3	10358631	Hmcn1	10454198	Rnf125
10474181	Abtb2	10358658	Hmcn1	10563099	Snord35b
10379820	Acaca	10541112	Hnrnpf	10376887	Snord49a
10565712	Acer3	10391103	Jup	10515735	Szt2
10391146	Acly	10607972	Kdm5d	10597268	Tdgf1
10556769	Acsm3	10446771	Lclat1	10379034	Tlcd1
10401244	Actn1	10459772	Lipg	10396161	Tmx1
10410477	Adamts16	10564713	Mfge8	10606609	Tspan6
10455919	Adamts19	10456587	Mro	10607962	Ube1y1
10546450	Adamts9	10408850	Nedd9	10608107	Uty
10496438	Adh1	10530477	Nfxl1	10521848	Zcchc4
10441740	Agpat4	10606979	Nup62cl	10454306	Zfp35
10351867	Aim2	10462507	Papss2	10591164	Zfp558
10506269	Ak3l1	10557177	Prkcb	10410650	Zfp825
10537146	Akr1b8	10515257	Rad54l	10608100	Zfy1
10461979	Aldh1a1	10530059	Sel1l3
10466624	Aldh1a7	10375065	Sh3pxd2b
10458960	Aldh7a1	10387516	Shbg
10607116	Ammecr1	10523260	Shroom3
10524588	Ankrd13a	10356329	Snora75
10591781	Anln	10578521	Snx25
10545958	Anxa4	10382328	Sox9
10558971	Ap2a2	10608193	Sry
10440491	App	10572038	Tmem192
10430113	Arhgap39	10571319	Tnks
10413419	Arhgef3	10474064	Trp53i11
10527441	Arpc1b	10531342	U90926
10394862	Asap2	10608107	Uty
10428763	Atad2	10585022	Zfp259
10500685	Atp1a1
10360270	Atp1a2
10359689	Atp1b1
10387505	Atp1b2
10533483	Atp2a2
10366004	Atp2b1
10443021	Atp6v0e
10601360	Atp7a
10530319	Atp8a1
10499666	Atp8b2
10600777	AU015836
10402715	Bag5
10392685	BC006965
10392687	BC006965
10488655	Bcl2l1
10606835	Bex2
10520842	Bre
10443421	Brpf3
10476538	Btbd3
10487480	Bub1
10519815	Cacna2d1
10585048	Cadm1
10417628	Cadps
10533529	Camkk2
10490923	Car2
10437590	Carhsp1
10474875	Casc5
10346564	Casp8
10436209	Cblb
10490097	Cbln4
10599604	Ccdc160
10569962	Ccl25
10497831	Ccna2
10569646	Ccnd1
10548105	Ccnd2
10474229	Cd59a
10458195	Cdc25c
10516246	Cdca8
10457644	Cdh2
10369815	Cdk1
10528583	Cdk5
10458828	Cdo1
10496204	Cenpe
10360985	Cenpf
10594855	Cgnl1
10503208	Chd7
10503184	Chd7
10503186	Chd7
10503182	Chd7
10503196	Chd7
10503222	Chd7
10503218	Chd7
10592201	Chek1
10460221	Chka
10365290	Chst11
10402708	Ckb
10508151	Clspn
10409345	Cltb
10597461	Cmtm7
10530503	Cnga1
10381154	Cnp
10424140	Col14a1
10370259	Col18a1
10574166	Cpne2
10544002	Creb3l2
10366293	Csrp2
10476924	Cst9
10454786	Ctnna1
10513061	Ctnnal1
10484402	Ctnnd1
10410124	Ctsl
10543273	Cttnbp2
10357472	Cxcr4
10544687	Cycs
10545771	Cyp26b1
10458046	D0H4S114
10356932	D1Ertd622e
10517892	D4Ertd22e
10436372	Dcbld2
10422249	Dct
10496727	Ddah1
10419240	Ddhd1
10369290	Ddit4
10450579	Ddr1
10608138	Ddx3y
10348321	Dgkd
10406581	Dhfr
10420155	Dhrs1
10419323	Dlgap5
10434675	Dnajb11
10558345	Dock1
10356020	Dock10
10514590	Dock7
10591816	Dpy19l1
10454254	Dtna
10571312	Dusp4
10422164	Ednrb
10518069	Efhd2
10576911	Efnb2
10608001	Eif2s3y
10371959	Elk3
10403842	Elmo1
10547758	Emg1
10510546	Eno1
10368289	Enpp1
10362245	Epb4.1l2
10355893	Epha4
10526566	Ephb4
10537657	Ephb6
10548905	Eps8
10373467	Erbb3
10413897	Ercc6
10606071	Ercc6l
10469581	Etl4
10349932	Etnk2
10437160	Ets2
10395457	Etv1
10438626	Etv5
10352048	Exo1
10399632	F630048H11Rik
10363224	Fabp7
10461439	Fads1
10465895	Fads2
10471424	Fam102a
10492682	Fam198b
10500610	Fam46c
10349637	Fam72a
10478160	Fam83d
10399465	Fam84a
10483521	Fastkd1
10571530	Fat1
10591135	Fat3
10591125	Fat3
10540085	Fbln2
10458999	Fbn2
10419223	Fermt2
10604751	Fgf13
10415651	Fgf9
10384373	Fignl1
10485402	Fjx1
10477012	Fkbp1a
10548194	Fkbp4
10412562	Flnb
10481540	Fnbp1
10497548	Fndc3b
10451613	Foxp4
10468992	Frmd4a
10530612	Fryl
10530563	Fryl
10527158	Fscn1
10509127	Fuca1
10420846	Fzd3
10346607	Fzd7
10605338	G6pdx
10377215	Gas7
10487011	Gatm
10580233	Gcdh
10587266	Gclc
10539773	Gfpt1
10594289	Glce
10579548	Glt25d1
10458714	Gm10267
10396656	Gm70
10382243	Gna13
10542650	Golt1b
10416974	Gpc6
10603151	Gpm6b
10529957	Gpr125
10384398	Grb10
10483163	Grb14
10360415	Grem2
10501229	Gstm1
10501222	Gstm2
10501208	Gstm6
10501199	Gstm7
10584710	H2afx
10362394	Hddc2
10497203	Hey1
10544114	Hipk2
10408077	Hist1h2ak
10372796	Hmga2
10366645	Hmga2
10494643	Hmgcs2
10385248	Hmmr
10406626	Homer1
10565152	Homer2
10485294	Hsd17b12
10410065	Hsd17b3
10396652	Hspa2
10599781	Htatsf1
10545629	Htra2
10584712	Hyou1
10565996	Inppl1
10507286	Ipp
10565018	Iqgap1
10411235	Iqgap2
10493103	Isg20l2
10594048	Islr2
10473125	Itga4
10480090	Itga8
10590031	Itga9
10473281	Itgav
10403229	Itgb8
10352234	Itpkb
10544150	Jhdm1d
10544148	Jhdm1d
10548043	Kcna5
10360972	Kcnk2
10607972	Kdm5d
10424559	Khdrbs3
10462796	Kif11
10350297	Kif14
10431659	Kif21a
10594251	Kif23
10362538	Lama4
10446763	Lbh
10372503	Lgr5
10422822	Lifr
10455813	Lmnb1
10502510	Lmo4
10477004	LOC100044416
10416215	Loxl2
10539263	Loxl3
10573939	Lpcat2
10446656	Lpin2
10473880	Lrp4
10408280	Lrrc16a
10523766	Lrrc8c
10523772	Lrrc8d
10458247	Lrrtm2
10498576	Lxn
10425283	Maff
10605766	Maged1
10487447	Mall
10599962	Mamld1
10594447	Map2k1
10382300	Map2k6
10443408	Mapk13
10557459	Mapk3
10594988	Mapk6
10357579	Mapkapk2
10515295	Mast2
10584674	Mcam
10353420	Mcm3
10473343	Med19
10406434	Mef2c
10475890	Mertk
10602068	Mid2
10416948	Mir17
10416950	Mir18
10568714	Mki67
10532954	Mlec
10535331	Mmd2
10492355	Mme
10573924	Mmp2
10582074	Mphosph6
10456587	Mro
10449581	Mtch1
10396610	Mthfd1
10367641	Mthfd1l
10545672	Mthfd2
10353010	Mybl1
10371627	Mybpc1
10430201	Myh9
10423293	Myo10
10580457	N4bp1
10358091	Nav1
10547943	Ncapd2
10521731	Ncapg
10408850	Nedd9
10553450	Nell1
10580382	Neto2
10361869	Nhsl1
10361882	Nhsl1
10410547	Nkd2
10604053	Nkrf
10477986	Nnat
10494595	Notch2
10346843	Nrp2
10600082	Nsdhl
10428412	Nudcd1
10375234	Nudcd2
10562480	Nudt19
10449363	Nudt3
10372082	Nudt4
10606979	Nup62cl
10474984	Nusap1
10354418	Obfc2a
10479411	Ogfr
10500808	Olfml3
10566136	Olfr543
10373036	Os9
10476628	Otor
10602198	Pak3
10505489	Pappa
10496110	Papss1
10462507	Papss2
10468292	Pdcd11
10555510	Pde2a
10495794	Pde5a
10443786	Pde9a
10522503	Pdgfra
10578322	Pdgfrl
10439218	Pdia5
10394735	Pdia6
10467420	Pdlim1
10502469	Pdlim5
10468789	Pdzd8
10374485	Peli1
10370376	Pfkl
10407481	Pfkp
10442454	Pgp
10383012	Pgs1
10602474	Phf8
10439710	Phldb2
10472212	Pkp4
10570855	Plat
10473097	Plekha3
10538394	Plekha8
10557156	Plk1
10587829	Plod2
10347310	Pnkd
10524169	Pole
10479736	Polr3k
10529977	Ppargc1a
10529979	Ppargc1a
10542791	Ppfibp1
10556082	Ppfibp2
10402730	Ppp1r13b
10467206	Ppp1r3c
10380477	Ppp1r9b
10359422	Prdx6
10399908	Prkar2b
10553413	Prmt3
10607877	Prps2
10466410	Psat1
10495316	Psrc1
10410039	Ptch1
10480734	Ptgds
10420957	Ptk2b
10435383	Ptplb
10513957	Ptprd
10558410	Ptpre
10395103	Pxdn
10488322	Ralgapa2
10430748	Rangap1
10502419	Rap1gds1
10417065	Rap2a
10492335	Rap2b
10472860	Rapgef4
10355050	Raph1
10531610	Rasgef1b
10446965	Rasgrp3
10366153	Rassf9
10453867	Rbbp8
10588037	Rbp1
10440993	Rcan1
10509820	Rcc2
10485645	Rcn1
10461057	Rcor2
10362633	Rev3l
10358733	Rgl1
10598863	Rgn
10410695	Rhobtb3
10533849	Rilpl1
10397853	Rin3
10419563	Rnase1
10571214	Rnf122
10399696	Rnf144a
10545394	Rnf181
10436519	Robo1
10440344	Robo2
10517116	Rps6ka1
10503835	Rragd
10488195	Rrbp1
10404612	Rreb1
10555695	Rrm1
10394978	Rrm2
10344723	Rrs1
10528090	Rundc3b
10531437	Scarb2
10352178	Sccpdh
10463355	Scd2
10492522	Schip1
10544875	Scrn1
10424905	Scx
10489484	Sdc4
10423520	Sema5a
10458843	Sema6a
10494174	Sema6c
10439021	Senp5
10523281	Sept11
10355984	Serpine2
10459905	Setbp1
10570957	Sfrp1
10344750	Sgk3
10346365	Sgol2
10602840	Sh3kbp1
10387516	Shbg
10576883	Shcbp1
10397002	Sipa1l1
10455873	Slc12a2
10495206	Slc16a4
10372988	Slc16a7
10475990	Slc20a1
10511631	Slc26a7
10455901	Slc27a6
10431872	Slc38a1
10457872	Slc39a6
10349711	Slc41a1
10505008	Slc44a1
10505028	Slc44a1
10429391	Slc45a4
10520187	Slc4a2
10523021	Slc4a4
10436945	Slc5a3
10599008	Slc6a14
10378816	Slc6a4
10600210	Slc6a8
10564631	Slco3a1
10418218	Slmap
10579860	Smad1
10504957	Smc2
10441902	Smoc2
10388185	Smtnl2
10586168	Snord16a
10575120	Sntb2
10372069	Socs2
10495285	Sort1
10549200	Sox5
10567108	Sox6
10382328	Sox9
10386058	Sparc
10531931	Sparcl1
10507040	Spata6
10346348	Spats2l
10591556	Spc24
10459552	Spire1
10523717	Spp1
10474671	Spred1
10374464	Spred2
10374455	Spred2
10458555	Spry4
10424349	Sqle
10608193	Sry
10378833	Ssh2
10429160	St3gal1
10592084	St3gal4
10440099	St3gal6
10434758	St6gal1
10475226	Stard9
10384961	Stc2
10507112	Stil
10555681	Stim1
10521950	Stim2
10578572	Stox2
10362171	Stx7
10479765	Suv39h2
10441456	Synj2
10577808	Tacc1
10427772	Tars
10553935	Tarsl2
10383799	Tcn2
10556442	Tead1
10536483	Tes
10524955	Tesc
10405587	Tgfbi
10452633	Tgif1
10365482	Timp3
10466745	Tjp2
10437575	Tmem114
10406530	Tmem167
10463632	Tmem180
10462005	Tmem2
10503410	Tmem64
10422518	Tmtc4
10578157	Tnks
10390707	Top2a
10368566	Tpd52l1
10589761	Trank1
10589773	Trank1
10596148	Trf
10424370	Trib1
10499045	Trim2
10403903	Trim27
10505512	Trim32
10393106	Trim47
10498620	Trim59
10410560	Trip13
10497862	Trpc3
10494821	Tspan2
10378508	Tsr1
10446907	Ttc27
10454015	Ttc39c
10587508	Ttk
10431017	Ttll1
10408610	Tubb2a
10408613	Tubb2b
10475027	Tyro3
10531342	U90926
10364293	Ube2g2
10359851	Uck2
10530201	Ugdh
10446074	Uhrf1
10439130	Umps
10545379	Usp39
10501879	Usp53
10417920	Usp54
10371676	Utp20
10608107	Uty
10479077	Vapb
10391454	Vat1
10410931	Vcan
10353028	Vcpip1
10469322	Vim
10369604	Vps26a
10398173	Vrk1
10556266	Wee1
10538377	Wipf3
10410947	Xrcc4
10521031	Ywhah
10571399	Zdhhc2
10352092	Zfp238
10505073	Zfp462
10456317	Zfp532
10427148	Zfp740
10573008	Zfp827
10505163	Zkscan16
♂ E11.5 over-expressed in all cell types
Supporting + interstitium + germ
Transcript cluster ID	Gene name
10608138	Ddx3y
10608001	Eif2s3y
10607972	Kdm5d
10608107	Uty
♂ E11.5 over-expressed in only 2 cell types
Supporting + interstitium		Supporting + germ		Interstitium + germ
Transcript cluster ID	Gene name	Transcript cluster ID	Gene name	Transcript cluster ID	Gene name
10424082	Aard	---		10446771	Lclat1
10410477	Adamts16
10490097	Cbln4
10402708	Ckb
10438626	Etv5
10501229	Gstm1
10501222	Gstm2
10501199	Gstm7
10456587	Mro
10408850	Nedd9
10606979	Nup62cl
10462507	Papss2
10387516	Shbg
10382328	Sox9
10608193	Sry
10531342	U90926
♀ E11.5 over-expressed
Supporting		Stroma		Germ
Transcript cluster ID	Gene name	Transcript cluster ID	Gene name	Transcript cluster ID	Gene name
10437928	0610037P05Rik	10386197	2210407C18Rik	10491601	4932438A13Rik
10481272	1700007K13Rik	10503593	6230409E13Rik	10402560	A130014H13Rik
10516277	1700029G01Rik	10441791	Airn	10390246	Calcoco2
10405820	1810034E14Rik	10502050	Alpk1	10573172	Clgn
10591749	1810064F22Rik	10601880	BC065397	10415838	Defb42
10437970	2310008H04Rik	10374727	Bcl11a	10449652	Dnahc8
10370544	2610008E11Rik	10476395	Bmp2	10393955	Dus1l
10497481	2810416G20Rik	10427862	Cdh6	10461723	Fam111a
10542885	2810474O19Rik	10533401	Cux2	10603135	Fancb
10565567	4632427E13Rik	10412260	Fst	10602401	Fgd1
10447079	4921513D11Rik	10442829	Gng13	10603508	Ftsj1
10587655	4930422I07Rik	10391746	Gpatch8	10600781	Gm4990
10489053	4930518I15Rik	10509163	Id3	10438784	Gm606
10525487	4932422M17Rik	10598798	Kdm6a	10605055	Haus7
10491597	4932438A13Rik	10373143	Mbd6	10607933	Hccs
10466938	5033414D02Rik	10409061	Mirlet7f-1	10399691	Id2
10409970	8430426H19Rik	10530615	Ociad2	10602644	Kdm5c
10584561	9030425E11Rik	10462630	Pank1	10598798	Kdm6a
10392642	Abca5	10357191	Ptpn4	10557575	Mylpf
10433735	Abcc1	10495054	Rhoc	10368534	Ncoa7
10346764	Abi2	10501586	S1pr1	10549804	Nlrp4c
10408331	Acot13	10594183	Senp8	10601942	Nrk
10467124	Acta2	10427590	Slc1a3	10607806	Ofd1
10371830	Actr6	10428328	Slc25a32	10361895	Olig3
10568873	Adam8	10515731	Szt2	10605943	Pdzd11
10440522	Adamts1	10422518	Tmtc4	10569437	Phlda2
10413086	Adk	10601328	Uprt	10548817	Plbd1
10556297	Adm	10509273	Wnt4	10603492	Porcn
10523647	Aff1	10606178	Xist	10605181	Renbp
10354111	Aff3	10400109	Zfp277	10469951	Rnf208
10461369	Ahnak			10502224	Sgms2
10465826	AI462493			10604076	Snora69
10504606	Aldh1b1			10378855	Ssh2
10427222	Amhr2			10592001	St14
10450038	Angptl4			10603431	Suv39h1
10586744	Anxa2			10607694	Syap1
10523451	Anxa3			10603478	Tbc1d25
10560618	Apoc1			10598482	Timm17b
10353064	Arfgef1			10567589	Usp31
10572960	Arhgap10			10593492	Zc3h12c
10495685	Arhgap29
10576482	Arv1
10543067	Asns
10522335	Atp10d
10600180	Atp2b3
10592420	AW551984
10382228	Axin2
10506452	AY512949
10554129	B130024G19Rik
10491520	B230207O21Rik
10475414	B2m
10489891	B4galt5
10557992	Bag3
10587085	BC031353
10549276	Bhlhe41
10476395	Bmp2
10587231	Bmp5
10514177	Bnc2
10579532	Bst2
10593856	C230081A13Rik
10418355	Cacna1d
10469404	Cacnb2
10503416	Calb1
10518835	Camta1
10515026	Cc2d1b
10496605	Ccbl2
10592289	Ccdc15
10515894	Ccdc30
10592856	Ccdc84
10528207	Cd36
10580033	Cd97
10352194	Cdc42bpa
10423230	Cdh9
10527940	Cdk14
10443463	Cdkn1a
10542310	Cdkn1b
10542317	Cdkn1b
10569429	Cdkn1c
10500021	Cgn
10606513	Chm
10371616	Chpt1
10474002	Chrm4
10581650	Chst4
10541555	Clec4a1
10595211	Col12a1
10559649	Cox6b2
10431637	Cpne8
10431564	Cpt1b
10514933	Cpt2
10493711	Crtc2
10565002	Crtc3
10355193	Crygc
10420372	Cryl1
10579012	Csgalnact1
10428522	Csmd3
10471058	Cstad
10457071	Cyb5
10472757	Cybrd1
10393364	Cygb
10364011	Cytsa
10572161	D10627
10574641	D230025D16Rik
10498998	D930015E06Rik
10506433	Dab1
10492136	Dclk1
10498204	Dclk1
10571984	Ddx60
10510129	Dhrs3
10400941	Dhrs7
10596263	Dnajc13
10395466	Dock4
10422436	Dock9
10495163	Dram2
10457686	Dsc2
10373093	Dtx3
10464400	E330013P04Rik
10568735	Ebf3
10551614	Ech1
10429327	Eif2c2
10563441	Emp3
10464391	Emx2
10523175	Ereg
10392183	Ern1
10351623	F11r
10375167	Fam196b
10540233	Fam19a1
10428912	Fam84b
10491732	Fat4
10568436	Fgfr2
10537394	Fmc1
10406845	Foxd1
10595911	Foxl2os
10396170	Frmd6
10412260	Fst
10530421	Gabra4
10405211	Gadd45g
10401968	Galc
10496555	Gbp1
10496592	Gbp2
10472350	Gca
10587988	Gk5
10499108	Glt28d2
10407707	Gm10336
10606391	Gm10452
10527963	Gm10484
10513186	Gm12538
10507101	Gm12824
10525195	Gm15800
10402378	Gm46
10440292	Gm5488
10407387	Gm7120
10442027	Gm9943
10530380	Gnpda2
10487945	Gpcpd1
10397645	Gpr65
10439634	Gtpbp8
10540275	Gxylt2
10418747	Hacl1
10603387	Hdac6
10435271	Heg1
10363641	Herc4
10494388	Hist2h2be
10358668	Hmcn1
10358666	Hmcn1
10358625	Hmcn1
10358621	Hmcn1
10358589	Hmcn1
10358587	Hmcn1
10358617	Hmcn1
10358591	Hmcn1
10358593	Hmcn1
10358605	Hmcn1
10358670	Hmcn1
10604542	Hs6st2
10531919	Hsd17b11
10506658	Hspb11
10397975	Ifi27l1
10569017	Ifitm3
10437846	Ifitm7
10436865	Ifngr2
10400095	Ifrd1
10365559	Igf1
10355500	Igfbp5
10579958	Il15
10407173	Il6st
10558001	Inpp5f
10580577	Irx3
10549282	Itpr2
10444028	Kank3
10582973	Kbtbd3
10470214	Kcnt1
10545308	Kdm3a
10598798	Kdm6a
10366052	Kitl
10355141	Klf7
10603896	Klhl13
10472598	Klhl23
10522075	Klhl5
10569972	Lass4
10496091	Lef1
10558265	Lhpp
10358272	Lhx9
10500876	Lrig2
10400126	Lrrn3
10472034	Lypd6
10472022	Lypd6b
10598771	Maoa
10433008	Map3k12
10373143	Mbd6
10604528	Mbnl3
10497773	Mccc1
10406334	Mctp1
10483548	Mettl5
10604612	Mir503
10430693	Mkl1
10575662	Mon1b
10529651	Msx1
10347036	Mtap2
10437885	Myh11
10456653	Myo5b
10585986	Myo9a
10585984	Myo9a
10413100	Myst4
10586724	Narg2
10555011	Nars2
10429140	Ndrg1
10575160	Nfat5
10404496	Nqo2
10410766	Nr2f1
10564527	Nr2f2
10408689	Nrn1
10576639	Nrp1
10465580	Nudt22
10606837	Nxf3
10524621	Oasl2
10584494	Olfr148
10506822	Orc1l
10447732	Pacrg
10462630	Pank1
10467162	Pank1
10425852	Parvb
10363455	Pcbd1
10498018	Pcdh18
10421911	Pcdh20
10521972	Pcdh7
10565547	Pcf11
10484283	Pde1a
10497399	Pde7a
10543017	Pdk4
10550509	Pglyrp1
10568266	Phkg2
10507273	Pik3r3
10480347	Pip4k2a
10500069	Pip5k1a
10373702	Pisd-ps1
10433887	Pkp2
10548817	Plbd1
10491106	Pld1
10447190	Plekhh2
10390519	Plxdc1
10352867	Plxna2
10543802	Plxna4
10464298	Pnlip
10543791	Podxl
10460392	Pold4
10392241	Polg2
10465804	Polr2g
10425987	Ppara
10356936	Ppip5k2
10361104	Ppp2r5a
10397984	Ppp4r4
10468869	Prdx3
10418410	Prkcd
10515012	Prpf38a
10525506	Psmd9
10357191	Ptpn4
10468795	Rab11fip2
10577190	Rasa3
10593213	Rbm7
10482144	Rc3h2
10415332	Rec8
10539017	Reep1
10351636	Refbp2
10495054	Rhoc
10545298	Rmnd5a
10357003	Rnf152
10404836	Rnf182
10355628	Rnf25
10394699	Rock2
10580550	Rpgrip1l
10602772	Rps6ka3
10449687	Rsph1
10508012	Rspo1
10546706	Rybp
10407598	Ryr2
10489107	Samhd1
10482301	Scai
10497971	Sclt1
10371811	Scyl2
10423548	Sdc2
10475544	Sema6d
10404422	Serpinb6b
10463462	Sfxn3
10552380	Siglecg
10464370	Slc18a2
10384539	Slc1a4
10364402	Slc1a6
10411751	Slc30a5
10592266	Slc37a2
10498024	Slc7a11
10571444	Slc7a2
10422240	Slitrk1
10499906	Smcp
10516956	Smpdl3b
10602756	Smpx
10501922	Snhg8
10584580	Snord14e
10397651	Spata7
10493864	Sprr2d
10493867	Sprr2e
10406551	Ssbp2
10471464	St6galnac6
10521543	Stx18
10379346	Suz12
10443091	Syngap1
10443080	Syngap1
10465790	Taf6l
10428842	Tatdn1
10600357	Taz
10509204	Tcea3
10365344	Tcp11l2
10416709	Tdrd3
10359118	Tdrd5
10571252	Tex15
10557960	Tgfb1i1
10476042	Tgm3
10453216	Thumpd2
10413542	Tkt
10565519	Tmem126b
10411459	Tmem171
10411456	Tmem174
10465783	Tmem179b
10462918	Tmem20
10352725	Tmem206
10584271	Tmem218
10559558	Tnni3
10559547	Tnnt1
10409602	Trpc7
10428536	Trps1
10465043	Tsga10ip
10397606	Tshr
10425999	Ttc38
10379968	Tubd1
10452480	Txndc2
10494428	Txnip
10531051	Ugt2b36
10383887	Uqcr10
10436708	Usp16
10475665	Usp8
10558580	Utf1
10545111	Vmn1r32
10545119	Vmn1r35
10552288	Vstm2b
10407513	Wdr37
10478540	Wfdc10
10489503	Wfdc6a
10509273	Wnt4
10413482	Wnt5a
10606178	Xist
10504499	Zcchc7
10534966	Zfp113
10400109	Zfp277
10386937	Zfp286
10386219	Zfp39
10442199	Zfp54
10551421	Zfp60
10590487	Zfp660
10386159	Zfp672
10376339	Zfp692
10551777	Zfp790
10410375	Zfp85-rs1
10428755	Zhx1
♀ E11.5 over-expressed in all cell types
Supporting + stroma + germ
Transcript cluster ID	Gene name
10598798	Kdm6a
♀ E11.5 over-expressed in only 2 cell types
Supporting + stroma		Supporting + germ		Stroma + germ
Transcript cluster ID	Gene name	Transcript cluster ID	Gene name	Transcript cluster ID	Gene name
10476395	Bmp2	10548817	Plbd1	---
10412260	Fst
10373143	Mbd6
10462630	Pank1
10357191	Ptpn4
10495054	Rhoc
10509273	Wnt4
10606178	Xist
10400109	Zfp277
♂ E12.5 over-expressed
Supporting		Interstitium		Germ
Transcript cluster ID	Gene name	Transcript cluster ID	Gene name	Transcript cluster ID	Gene name
10526145	0610007L01Rik	10557165	2010110P09Rik	10389601	1200011M11Rik
10493203	0610031J06Rik	10508996	2610002D18Rik	10499342	1700021C14Rik
10477929	1110008F13Rik	10419416	3632451O06Rik	10418812	1700024G13Rik
10410115	1110018J18Rik	10355176	4921521F21Rik	10436206	1700116B05Rik
10394082	1110031I02Rik	10495945	4930422G04Rik	10508468	2510006D16Rik
10391119	1110036O03Rik	10575775	4933407C03Rik	10407053	2810008M24Rik
10485013	1110051M20Rik	10427049	6030408B16Rik	10491977	2810046L04Rik
10353545	1110058L19Rik	10476906	8030411F24Rik	10447551	5730437N04Rik
10487476	1500011K16Rik	10546567	A130022J15Rik	10416736	6720463M24Rik
10593913	1700017B05Rik	10536635	A430107O13Rik	10590860	9030420J04Rik
10354275	1700029F09Rik	10424082	Aard	10461979	Aldh1a1
10521907	1810013D10Rik	10565712	Acer3	10570764	Alg11
10495826	1810037I17Rik	10607089	Acsl4	10582925	Alkbh8
10390635	1810046J19Rik	10568668	Adam12	10526754	Ap4m1
10557165	2010110P09Rik	10410477	Adamts16	10565627	Aqp11
10586274	2010321M09Rik	10375751	Adamts2	10485989	Aqr
10488472	2310001A20Rik	10440534	Adamts5	10469425	Arl5b
10568521	2310057M21Rik	10546454	Adamts9	10376787	B9d1
10508996	2610002D18Rik	10546434	Adamts9	10508269	BC003266
10402073	2610021K21Rik	10496438	Adh1	10419261	Bmp4
10440794	2610039C10Rik	10344725	Adhfe1	10514177	Bnc2
10438091	2610318N02Rik	10441740	Agpat4	10518812	Camta1
10571911	2700029M09Rik	10505132	Akap2	10423024	Capsl
10484425	2700094K13Rik	10505143	Akap2	10507334	Ccdc163
10350848	2810025M15Rik	10537146	Akr1b8	10547492	Ccdc77
10586448	2810417H13Rik	10596454	Alas1	10587012	Ccpg1
10512915	2810432L12Rik	10461979	Aldh1a1	10474229	Cd59a
10368045	3110003A17Rik	10466624	Aldh1a7	10458195	Cdc25c
10344743	3110035E14Rik	10364903	Amh	10519324	Cdk6
10555576	3200002M19Rik	10350840	Angptl1	10481670	Cdk9
10507190	4732418C07Rik	10497920	Ankrd50	10408455	Cdkal1
10544689	4921507P07Rik	10473444	Aplnr	10487109	Cep152
10575578	4930402E16Rik	10485963	Arhgap11a	10366073	Cep290
10495935	4930422G04Rik	10606735	Armcx2	10524105	Chfr
10495945	4930422G04Rik	10350392	Aspm	10601303	Chic1
10401852	4930534B04Rik	10405047	Aspn	10490845	Chmp4c
10371591	4930547N16Rik	10500685	Atp1a1	10568553	Chst15
10562368	4931406P16Rik	10387505	Atp1b2	10427323	Copz1
10502071	5730508B09Rik	10357833	Atp2b4	10380699	Copz2
10554325	5730590G19Rik	10600777	AU015836	10527455	Cpsf4
10591035	5830418K08Rik	10606835	Bex2	10392721	Cpsf4l
10427049	6030408B16Rik	10600169	Bgn	10460157	Cpt1a
10414433	6720456H20Rik	10369844	Bicc1	10476915	Cst8
10416736	6720463M24Rik	10369842	Bicc1	10476924	Cst9
10476906	8030411F24Rik	10443421	Brpf3	10478967	Cstf1
10421697	9030625A04Rik	10487480	Bub1	10423836	Cthrc1
10488409	9230104L09Rik	10427436	C7	10445308	Cyp39a1
10453629	9430020K01Rik	10466622	C730037M02Rik	10440427	D16Ertd472e
10427045	9430023L20Rik	10400589	C79407	10481420	D2Wsu81e
10565255	9930013L23Rik	10448925	Cacna1h	10556208	D930014E17Rik
10546567	A130022J15Rik	10588592	Cacna2d2	10499138	Dclk2
10354267	A530098C11Rik	10417628	Cadps	10608138	Ddx3y
10418092	A830039N20Rik	10494804	Casq2	10488642	Defb19
10586130	Aagab	10580469	Cbln1	10373542	Dgka
10424082	Aard	10490097	Cbln4	10389738	Dgke
10433445	Abat	10436182	Cd47	10591612	Dock6
10528648	Abcf2	10436196	Cd47	10591628	Dock6
10554269	Abhd2	10453049	Cdc42ep3	10463505	Dpcd
10474181	Abtb2	10385926	Cdc42se2	10541515	Dppa3
10391146	Acly	10438378	Cdc45	10455533	Eif1a
10607089	Acsl4	10496204	Cenpe	10608001	Eif2s3y
10477649	Acss2	10364102	Chchd10	10480414	Enkur
10396862	Actn1	10503208	Chd7	10428619	Enpp2
10401244	Actn1	10606083	Cited1	10447317	Epas1
10561527	Actn4	10402708	Ckb	10373467	Erbb3
10413502	Actr8	10502552	Clca1	10395457	Etv1
10489391	Ada	10502565	Clca2	10581197	Exoc3l
10568668	Adam12	10508151	Clspn	10462822	Exoc6
10577757	Adam9	10409345	Cltb	10428579	Ext1
10410477	Adamts16	10416057	Clu	10399632	F630048H11Rik
10540207	Adamts9	10530503	Cnga1	10346914	Fastkd2
10546432	Adamts9	10424140	Col14a1	10399308	Fkbp1b
10546430	Adamts9	10370259	Col18a1	10571233	Fut10
10546434	Adamts9	10576973	Col4a1	10584883	Fxyd6
10546454	Adamts9	10570068	Col4a2	10351035	Gas5
10546450	Adamts9	10521602	Cpeb2	10351039	Gas5
10546452	Adamts9	10485117	Creb3l1	10487011	Gatm
10437364	Adcy9	10476924	Cst9	10404702	Gcnt2
10496438	Adh1	10581882	Ctrb1	10442052	Gm6712
10496475	Adh5	10348451	Cxcr7	10358754	Gm7278
10344725	Adhfe1	10585794	Cyp11a1	10442829	Gng13
10395058	Adi1	10468239	Cyp17a1	10592471	Gramd1b
10357878	Adora1	10545771	Cyp26b1	10525766	Gtf2h3
10374083	Aebp1	10474825	D2Ertd750e	10552945	Gys1
10468668	Afap1l2	10396270	Dact1	10435271	Heg1
10444420	Agpat1	10608138	Ddx3y	10424670	Hemt1
10441740	Agpat4	10488642	Defb19	10413393	Hesx1
10473024	Agps	10578241	Dlc1	10389786	Hlf
10359446	AI848100	10434675	Dnajb11	10410065	Hsd17b3
10535502	Aimp2	10356020	Dock10	10435443	Hspbap1
10367634	Akap12	10421046	Dock5	10436169	Ift57
10537169	Akr1b7	10591630	Dock6	10494781	Igsf3
10537146	Akr1b8	10368647	Dse	10565996	Inppl1
10596454	Alas1	10404649	Dsp	10415960	Ints9
10461979	Aldh1a1	10454254	Dtna	10439114	Iqcg
10466624	Aldh1a7	10466304	Dtx4	10376060	Irf1
10458960	Aldh7a1	10563780	E2f8	10582811	Irf2bp2
10351414	Aldh9a1	10579812	Ednra	10385500	Irgm1
10568050	Aldoa	10518069	Efhd2	10444028	Kank3
10426292	Alg10b	10452419	Efna5	10540227	Kbtbd8
10555041	Alg8	10427496	Egflam	10354807	Kctd18
10364903	Amh	10608001	Eif2s3y	10607972	Kdm5d
10607116	Ammecr1	10406254	Ell2	10390780	Krt222
10350840	Angptl1	10403842	Elmo1	10439471	Ktelc1
10524588	Ankrd13a	10406817	Enc1	10506110	L1td1
10380384	Ankrd40	10502081	Enpep	10352314	Lefty1
10497920	Ankrd50	10401454	Entpd5	10352302	Lefty2
10591781	Anln	10548905	Eps8	10474419	Lgr4
10594631	Aph1b	10373467	Erbb3	10389283	Lhx1
10499309	Apoa1bp	10355278	Erbb4	10467139	Lipa
10389373	Appbp2	10606071	Ercc6l	10422980	Lmbrd2
10386370	Arf1	10599650	Etd	10502770	Lphn2
10479490	Arfgap1	10469581	Etl4	10348493	Lrrfip1
10485963	Arhgap11a	10395457	Etv1	10602865	Map3k15
10467637	Arhgap19	10438626	Etv5	10443408	Mapk13
10430113	Arhgap39	10353192	Eya1	10584674	Mcam
10449258	Arhgdig	10461723	Fam111a	10354003	Mgat4a
10570483	Arhgef10	10459335	Fam38b	10491952	Mgst2
10413419	Arhgef3	10500610	Fam46c	10457323	Mkx
10601768	Armcx4	10404152	Fam65b	10586907	Mns1
10527441	Arpc1b	10604175	Fam70a	10447100	Morn2
10555235	Arrb1	10540738	Fancd2	10450640	Mrps18b
10350392	Aspm	10571530	Fat1	10572077	Naf1
10428763	Atad2	10591112	Fat3	10504743	Nans
10453062	Atl2	10591114	Fat3	10442087	Ncrna00085
10500685	Atp1a1	10591116	Fat3	10351277	Nme7
10360270	Atp1a2	10591118	Fat3	10482517	Nmi
10387505	Atp1b2	10591090	Fat3	10400155	Nova1
10533483	Atp2a2	10591092	Fat3	10359890	Nuf2
10366004	Atp2b1	10591135	Fat3	10433197	Olfr161
10600377	Atp6ap1	10591131	Fat3	10479833	Optn
10581289	Atp6v0d1	10591123	Fat3	10373577	Ormdl2
10443021	Atp6v0e	10591125	Fat3	10419356	Otx2
10547521	Atp6v1e1	10591129	Fat3	10419744	Oxa1l
10344637	Atp6v1h	10591120	Fat3	10535329	Papolb
10601360	Atp7a	10591127	Fat3	10366266	Pawr
10530319	Atp8a1	10540085	Fbln2	10545910	Pcyox1
10499666	Atp8b2	10487040	Fbn1	10472846	Pdk1
10600777	AU015836	10593483	Fdx1	10467420	Pdlim1
10490104	Aurka	10392881	Fdxr	10571601	Pdlim3
10377405	Aurkb	10604751	Fgf13	10468789	Pdzd8
10561104	Axl	10385036	Fgf18	10480035	Pfkfb3
10417124	B930095G15Rik	10415651	Fgf9	10518686	Pik3cd
10353750	Bag2	10578352	Fgl1	10486403	Pla2g4e
10535559	Baiap2l1	10603099	Figf	10594053	Pml
10465005	Banf1	10542079	Foxm1	10469867	Pnpla7
10355325	Bard1	10362499	Frk	10504518	Polr1e
10355327	Bard1	10484307	Frzb	10370708	Polr2e
10355329	Bard1	10362596	Fyn	10423742	Polr2k
10583847	Bbs9	10605338	G6pdx	10423629	Pop1
10439854	Bbx	10487011	Gatm	10449575	Ppil1
10392687	BC006965	10422844	Gdnf	10361104	Ppp2r5a
10392685	BC006965	10503334	Gem	10507784	Ppt1
10576569	BC021891	10447097	Gemin6	10393309	Prpsap1
10352294	BC031781	10399391	Gen1	10380815	Psmb3
10524568	BC057022	10420362	Gjb2	10456414	Psmg2
10581890	Bcar1	10585398	Gldn	10471721	Ptgs1
10495781	Bcar3	10373179	Gli1	10513166	Ptpn3
10553015	Bcat2	10357137	Gli2	10352306	Pycr2
10498710	Bche	10504450	Glipr2	10524781	Rab35
10434934	Bdh1	10346321	Gm10561	10504551	Rg9mtd3
10469020	Bend7	10404885	Gmpr	10533849	Rilpl1
10606835	Bex2	10461856	Gna14	10534021	Rimbp2
10382998	Birc5	10571815	Gpm6a	10388784	Rpl23a
10564978	Blm	10373325	Gpr182	10408666	Rpp40
10475708	Blvra	10376201	Gpx3	10449687	Rsph1
10583870	Bmper	10592471	Gramd1b	10363599	Rufy2
10391461	Brca1	10483163	Grb14	10571728	Rwdd4a
10458138	Brd8	10360415	Grem2	10489107	Samhd1
10389395	Brip1	10590663	Gria4	10492522	Schip1
10443421	Brpf3	10464425	Grk5	10489484	Sdc4
10411448	Btf3	10345065	Gsta3	10382890	Sec14l1
10515046	Btf3l4	10587315	Gsta4	10498319	Serp1
10487480	Bub1	10501229	Gstm1	10492628	Serpini1
10474769	Bub1b	10501222	Gstm2	10516932	Sesn2
10558248	Bub3	10501208	Gstm6	10386604	Shmt1
10346523	Bzw1	10501199	Gstm7	10373202	Shmt2
10401441	C130039O16Rik	10514201	Haus6	10512308	Sigmar1
10436106	C330027C09Rik	10605055	Haus7	10584977	Sik3
10392910	C630004H02Rik	10519857	Hgf	10532999	Sirt4
10466622	C730037M02Rik	10579894	Hhip	10428328	Slc25a32
10400589	C79407	10404053	Hist1h2bc	10380524	Slc35b1
10448925	Cacna1h	10358621	Hmcn1	10431894	Slc38a2
10588592	Cacna2d2	10358541	Hmcn1	10605986	Slc7a3
10585048	Cadm1	10358611	Hmcn1	10356886	Slco4c1
10550915	Cadm4	10358595	Hmcn1	10461148	Snhg1
10417628	Cadps	10358543	Hmcn1	10454807	Snora74a
10433057	Calcoco1	10358633	Hmcn1	10586168	Snord16a
10580219	Calr	10385248	Hmmr	10563099	Snord35b
10533529	Camkk2	10472958	Hoxd10	10450363	Snord52
10516051	Cap1	10574780	Hsd11b2	10372069	Socs2
10607143	Capn6	10410065	Hsd17b3	10346348	Spats2l
10474875	Casc5	10500565	Hsd3b1	10532767	Ssh1
10580469	Cbln1	10384223	Igfbp3	10465790	Taf6l
10490097	Cbln4	10530841	Igfbp7	10524844	Taok3
10507334	Ccdc163	10345777	Il1rl2	10521927	Tbc1d19
10547492	Ccdc77	10403743	Inhba	10456522	Tcf4
10385153	Ccdc99	10357155	Inhbb	10597268	Tdgf1
10574226	Ccl17	10507286	Ipp	10359118	Tdrd5
10497831	Ccna2	10411235	Iqgap2	10507347	Tesk2
10594774	Ccnb2	10594044	Islr	10452633	Tgif1
10503264	Ccne2	10594048	Islr2	10426751	Tmbim6
10448506	Ccnf	10395394	Ispd	10532157	Tmed5
10493193	Cct3	10473125	Itga4	10517328	Tmem50a
10362803	Cd164	10590031	Itga9	10352320	Tmem63a
10521678	Cd38	10435305	Itgb5	10442932	Tmem8
10559261	Cd81	10403229	Itgb8	10409021	Tpmt
10604932	Cd99l2	10469151	Itih5	10601988	Trap1a
10515744	Cdc20	10567297	Itpripl2	10505512	Trim32
10589420	Cdc25a	10488060	Jag1	10366446	Tspan8
10458195	Cdc25c	10458685	Jakmip2	10607962	Ube1y1
10591472	Cdc37	10436666	Jam2	10369877	Ube2d1
10494200	Cdc42se1	10544150	Jhdm1d	10469058	Ucma
10385926	Cdc42se2	10544148	Jhdm1d	10443704	Umodl1
10438378	Cdc45	10514576	Kank4	10411432	Utp15
10381072	Cdc6	10463476	Kazald1	10388971	Utp6
10421029	Cdca2	10352798	Kcnh1	10608107	Uty
10541729	Cdca3	10607972	Kdm5d	10393098	Wbp2
10460738	Cdca5	10350297	Kif14	10513592	Wdr31
10399178	Cdca7l	10594251	Kif23	10561837	Zfp146
10516246	Cdca8	10525591	Kntc1	10513544	Zfp37
10369307	Cdh23	10368409	Lama2	10549899	Zfp418
10575034	Cdh3	10362538	Lama4	10405927	Zfp455
10369815	Cdk1	10422822	Lifr	10463121	Zfp518
10578619	Cdkn2aip	10459481	Lman1	10561831	Zfp566
10375903	Cdkn2aipnl	10416215	Loxl2	10487433	Zfp661
10414315	Cdkn3	10446656	Lpin2	10552440	Zfp719
10458828	Cdo1	10572130	Lpl	10394119	Zfp750
10552140	Cebpa	10529445	Lrpap1	10559825	Zfp773
10547513	Cecr5	10538087	Lrrc61	10608100	Zfy1
10569163	Cend1	10369752	Lrrtm3	10599812	Zic3
10520521	Cenpa	10559207	Lsp1	10526735	Zscan21
10496204	Cenpe	10561212	Ltbp4	10478590	Zswim1
10360985	Cenpf	10487447	Mall
10411728	Cenph	10443408	Mapk13
10601705	Cenpi	10438708	Masp1
10406968	Cenpk	10459611	Mc2r
10351047	Cenpl	10406434	Mef2c
10575733	Cenpn	10504470	Melk
10409190	Cenpp	10376778	Mfap4
10450957	Cenpq	10556381	Mical2
10386909	Cenpv	10535331	Mmd2
10456490	Cep192	10492355	Mme
10462866	Cep55	10595979	Mras
10470775	Cercam	10456587	Mro
10604974	Cetn2	10601980	Mum1l1
10446027	Chaf1a	10353010	Mybl1
10364102	Chchd10	10366994	Myo1a
10546346	Chchd4	10467258	Myof
10592201	Chek1	10358091	Nav1
10524266	Chek2	10408850	Nedd9
10460221	Chka	10580382	Neto2
10524790	Cit	10403584	Nid1
10606083	Cited1	10578045	Nrg1
10577508	Ckap2	10346843	Nrp2
10487577	Ckap2l	10548038	Ntf3
10402708	Ckb	10372139	Nts
10499639	Cks1b	10562480	Nudt19
10589800	Clasp2	10359890	Nuf2
10502552	Clca1	10354418	Obfc2a
10502565	Clca2	10556076	Olfml1
10491313	Cldn11	10500808	Olfml3
10527965	Cldn12	10423654	Osr2
10436402	Cldnd1	10602198	Pak3
10508151	Clspn	10505120	Palm2
10409345	Cltb	10462507	Papss2
10389526	Cltc	10534862	Pcolce
10416057	Clu	10495794	Pde5a
10542665	Cmas	10595466	Pgm3
10589929	Cmtm6	10480347	Pip4k2a
10597461	Cmtm7	10472212	Pkp4
10546079	Cnbp	10476443	Plcb4
10530503	Cnga1	10587829	Plod2
10352348	Cnih4	10489569	Pltp
10381154	Cnp	10372028	Plxnc1
10483178	Cobll1	10562578	Pop4
10424140	Col14a1	10529977	Ppargc1a
10370259	Col18a1	10529979	Ppargc1a
10345101	Col9a1	10556082	Ppfibp2
10507742	Col9a2	10396068	Ppil5
10479423	Col9a3	10551736	Ppp1r14a
10498296	Commd2	10507784	Ppt1
10572357	Cope	10554445	Prc1
10386442	Cops3	10538811	Prdm5
10376555	Cops3	10423049	Prlr
10427323	Copz1	10487937	Prokr2
10551836	Cox7a1	10436456	Pros1
10490989	Cp	10587616	Prss35
10544002	Creb3l2	10410039	Ptch1
10426098	Creld2	10480734	Ptgds
10478799	Cse1l	10420957	Ptk2b
10589494	Cspg5	10424607	Ptp4a3
10488404	Cst11	10546834	Rad18
10488415	Cst3	10359201	Ralgps2
10476915	Cst8	10417065	Rap2a
10476924	Cst9	10355050	Raph1
10601673	Cstf2	10531610	Rasgef1b
10362201	Ctgf	10506254	Raver2
10363676	Ctnna3	10440993	Rcan1
10581882	Ctrb1	10384725	Rel
10581355	Ctrl	10349922	Ren1
10415844	Ctsb	10548899	Rerg
10554789	Ctsc	10520080	Rint1
10569319	Ctsd	10545394	Rnf181
10460468	Ctsf	10428157	Rnf19a
10587733	Ctsh	10436519	Robo1
10410124	Ctsl	10440344	Robo2
10492699	Ctso	10503835	Rragd
10569569	Cttn	10378549	Rtn4rl1
10454851	Cxxc5	10503382	Runx1t1
10582303	Cyba	10587604	Rwdd2a
10544687	Cycs	10405179	S1pr3
10545771	Cyp26b1	10533929	Scarb1
10561128	Cyp2s1	10463355	Scd2
10502655	Cyr61	10483353	Scn7a
10458046	D0H4S114	10569129	Sct
10450374	D17H6S56E-5	10530059	Sel1l3
10451993	D17Wsu104e	10423520	Sema5a
10345368	D1Ertd448e	10523281	Sept11
10474825	D2Ertd750e	10355984	Serpine2
10501754	D3Bwg0562e	10403834	Sfrp4
10517892	D4Ertd22e	10344750	Sgk3
10596893	Dag1	10467068	Sgms1
10528077	Dbf4	10387516	Shbg
10413530	Dcp1a	10576883	Shcbp1
10592099	Dcps	10491300	Skil
10422249	Dct	10372988	Slc16a7
10496727	Ddah1	10475990	Slc20a1
10518019	Ddi2	10455901	Slc27a6
10509542	Ddost	10599008	Slc6a14
10450579	Ddr1	10378816	Slc6a4
10399430	Ddx1	10600210	Slc6a8
10573217	Ddx39	10441902	Smoc2
10608138	Ddx3y	10383731	Smtn
10590383	Deb1	10388185	Smtnl2
10488642	Defb19	10558919	Snora52
10542460	Dera	10578521	Snx25
10428736	Derl1	10593878	Snx33
10364093	Derl3	10501762	Snx7
10406581	Dhfr	10372069	Socs2
10432372	Dhh	10529515	Sorcs2
10389300	Dhrs11	10463875	Sorcs3
10388018	Dhx33	10395389	Sostdc1
10421877	Diap3	10382328	Sox9
10426835	Dip2b	10346348	Spats2l
10600485	Dkc1	10523717	Spp1
10419323	Dlgap5	10473160	Ssfa2
10462217	Dmrt1	10378855	Ssh2
10363575	Dna2	10476886	Sstr4
10434675	Dnajb11	10564624	St8sia2
10518031	Dnajc16	10571054	Star
10591369	Dnmt1	10475226	Stard9
10477325	Dnmt3b	10416181	Stc1
10356020	Dock10	10384961	Stc2
10421046	Dock5	10578572	Stox2
10514590	Dock7	10578574	Stox2
10545623	Dok1	10453636	Svil
10562500	Dpy19l3	10577808	Tacc1
10520527	Dpysl5	10351825	Tagln2
10428672	Dscc1	10553935	Tarsl2
10454172	Dsg2	10602020	Tbc1d8b
10404649	Dsp	10368240	Tcf21
10345241	Dst	10524955	Tesc
10361110	Dtl	10551185	Tgfb1
10454254	Dtna	10532085	Tgfbr3
10394186	Dtnb	10488378	Thbd
10466304	Dtx4	10381006	Thra
10356859	Dtymk	10516735	Tinagl1
10377681	Dullard	10554667	Tmc3
10488678	Dusp15	10346150	Tmeff2
10548735	Dusp16	10535174	Tmem184a
10571312	Dusp4	10462005	Tmem2
10366043	Dusp6	10584870	Tmprss13
10532984	Dynll1	10396161	Tmx1
10366277	E2f7	10513739	Tnc
10563780	E2f8	10413726	Tnnc1
10497520	Ect2	10350173	Tnnt2
10585759	Edc3	10511416	Tox
10408762	Eef1e1	10533145	Tpcn1
10374777	Efemp1	10368566	Tpd52l1
10348194	Efhd1	10362615	Traf3ip2
10518069	Efhd2	10589761	Trank1
10576911	Efnb2	10589773	Trank1
10486396	Ehd4	10393106	Trim47
10381115	Eif1	10497862	Trpc3
10460573	Eif1ad	10369531	Tspan15
10538939	Eif2ak3	10559248	Tspan32
10533858	Eif2b1	10441497	Tulp4
10608001	Eif2s3y	10395320	Twist1
10571162	Eif4ebp1	10586017	Uaca
10523058	Eif5a	10608107	Uty
10371959	Elk3	10501608	Vcam1
10406254	Ell2	10410931	Vcan
10403842	Elmo1	10362138	Vnn1
10390050	Eme1	10524878	Vsig10
10406817	Enc1	10524874	Vsig10
10510546	Eno1	10424252	Wdyhv1
10368289	Enpp1	10544089	Zc3hav1
10463070	Entpd1	10346878	Zdbf2
10401454	Entpd5	10482448	Zeb2
10447317	Epas1
10407955	Epdr1
10509965	Epha2
10537657	Ephb6
10548905	Eps8
10406205	Erap1
10380896	Erbb2
10373467	Erbb3
10355278	Erbb4
10413897	Ercc6
10606071	Ercc6l
10561004	Erf
10443009	Ergic1
10384940	Erlec1
10419198	Ero1l
10403558	Ero1lb
10512851	Erp44
10420877	Esco2
10427166	Espl1
10599650	Etd
10469581	Etl4
10349932	Etnk2
10437160	Ets2
10395457	Etv1
10438626	Etv5
10398267	Evl
10352048	Exo1
10498168	Exosc8
10353192	Eya1
10544501	Ezh2
10495675	F3
10420426	F630043A04Rik
10503617	F730047E07Rik
10363224	Fabp7
10461439	Fads1
10465895	Fads2
10427918	Fam105a
10461723	Fam111a
10528527	Fam126a
10449034	Fam173a
10554156	Fam174b
10492682	Fam198b
10359190	Fam20b
10379989	Fam33a
10500610	Fam46c
10361995	Fam54a
10517263	Fam54b
10494208	Fam63a
10404152	Fam65b
10478160	Fam83d
10425421	Fam83f
10399465	Fam84a
10452892	Fam98a
10540738	Fancd2
10554281	Fanci
10417095	Farp1
10393970	Fasn
10571530	Fat1
10540085	Fbln2
10487040	Fbn1
10532368	Fbrsl1
10557742	Fbxl19
10551542	Fbxo17
10361375	Fbxo5
10392881	Fdxr
10461452	Fen1
10465912	Fen1
10452907	Fez2
10604751	Fgf13
10385036	Fgf18
10415651	Fgf9
10578352	Fgl1
10384373	Fignl1
10526508	Fis1
10544885	Fkbp14
10477012	Fkbp1a
10465553	Fkbp2
10449452	Fkbp5
10421488	Fndc3a
10497548	Fndc3b
10566034	Folr1
10576051	Foxc2
10542079	Foxm1
10451613	Foxp4
10468992	Frmd4a
10530592	Fryl
10530563	Fryl
10375956	Fstl4
10603508	Ftsj1
10392098	Ftsj3
10509127	Fuca1
10377569	Fxr2
10584883	Fxyd6
10362596	Fyn
10420846	Fzd3
10346607	Fzd7
10534426	Fzd9
10395612	G2e3
10521984	G6pd2
10605338	G6pdx
10555027	Gab2
10500103	Gabpb2
10376269	Galnt10
10461277	Ganab
10371770	Gas2l3
10377215	Gas7
10487011	Gatm
10493435	Gba
10463557	Gbf1
10524723	Gcn1l1
10466521	Gcnt1
10594840	Gcom1
10422844	Gdnf
10503334	Gem
10399391	Gen1
10539773	Gfpt1
10539119	Ggcx
10476989	Gins1
10363173	Gja1
10420362	Gjb2
10415604	Gjb2
10589889	Glb1
10543118	Glcci1
10594289	Glce
10585398	Gldn
10572679	Glt25d1
10579548	Glt25d1
10413220	Gm10397
10353036	Gm10567
10425265	Gm10863
10512065	Gm12387
10507471	Gm13015
10480087	Gm13310
10545210	Gm1524
10360324	Gm2710
10407051	Gm2736
10376208	Gm2a
10449280	Gm5226
10528480	Gm6560
10396656	Gm70
10400710	Gm71
10400189	Gm7172
10564565	Gm7693
10548699	Gm8956
10362902	Gm9034
10408321	Gmnn
10404885	Gmpr
10382243	Gna13
10511069	Gnb1
10587194	Gnb5
10512640	Gne
10418480	Gnl3
10472724	Gorasp2
10604576	Gpc3
10416974	Gpc6
10562360	Gpi1
10603151	Gpm6b
10529957	Gpr125
10543466	Gpr37
10574259	Gpr56
10545065	Gprin3
10501402	Gpsm2
10376201	Gpx3
10592471	Gramd1b
10427026	Grasp
10483163	Grb14
10360415	Grem2
10594835	Grinl1a
10381601	Grn
10388234	Gsg2
10571274	Gsr
10345065	Gsta3
10587315	Gsta4
10501229	Gstm1
10501222	Gstm2
10501208	Gstm6
10501199	Gstm7
10534102	Gusb
10450154	H2-Aa
10384145	H2afv
10584710	H2afx
10450075	H2-K1
10405811	Habp4
10458398	Hars
10575095	Has3
10529344	Haus3
10514201	Haus6
10605055	Haus7
10362394	Hddc2
10456798	Hdhd2
10462702	Hectd2
10354598	Hecw2
10462973	Hells
10382152	Helz
10585874	Hexa
10577882	Hgsnat
10534456	Hip1
10500813	Hipk1
10544114	Hipk2
10404069	Hist1h1a
10408081	Hist1h1b
10404063	Hist1h2ab
10408077	Hist1h2ak
10404061	Hist1h2bb
10404053	Hist1h2bc
10408197	Hist1h2bh
10403943	Hist1h2bm
10408225	Hist1h4c
10404051	Hist1h4d
10408200	Hist1h4f
10404024	Hist1h4h
10500333	Hist2h4
10548857	Hist4h4
10356461	Hjurp
10369541	Hk1
10545588	Hk2
10592816	Hmbs
10372796	Hmga2
10606436	Hmgn5
10385248	Hmmr
10392943	Hn1
10565156	Homer2
10506004	Hook1
10380622	Hoxb9
10571840	Hpgd
10497421	Hps3
10485294	Hsd17b12
10410065	Hsd17b3
10371482	Hsp90b1
10471586	Hspa5
10599781	Htatsf1
10545629	Htra2
10584712	Hyou1
10360884	Iars2
10564857	Idh2
10509777	Iffo2
10494781	Igsf3
10541246	Il17ra
10557326	Il4ra
10493770	Ilf2
10497285	Impa1
10511368	Impad1
10465861	Incenp
10578615	Ing2
10347669	Inha
10357155	Inhbb
10355069	Ino80d
10565996	Inppl1
10499777	Ints3
10556216	Ipo7
10507286	Ipp
10411235	Iqgap2
10571705	Irf2
10576971	Irs2
10594048	Islr2
10449266	Itfg3
10586079	Itga11
10473125	Itga4
10480090	Itga8
10473281	Itgav
10435305	Itgb5
10403229	Itgb8
10458685	Jakmip2
10436666	Jam2
10544829	Jazf1
10544150	Jhdm1d
10391103	Jup
10463476	Kazald1
10548051	Kcna6
10352798	Kcnh1
10360972	Kcnk2
10457606	Kctd1
10607972	Kdm5d
10462796	Kif11
10350297	Kif14
10590494	Kif15
10474381	Kif18a
10391811	Kif18b
10454709	Kif20a
10462632	Kif20b
10431659	Kif21a
10568150	Kif22
10594251	Kif23
10515431	Kif2c
10601011	Kif4
10578922	Klhl2
10525591	Kntc1
10565479	l7Rn6
10362538	Lama4
10521709	Lap3
10376312	Larp1
10605831	Las1l
10472501	Lass6
10420413	Lats2
10446771	Lclat1
10517301	Ldlrap1
10421853	Lect1
10507612	Lepre1
10402268	Lgmn
10422822	Lifr
10550102	Lig1
10534324	Limk1
10459772	Lipg
10459481	Lman1
10409434	Lman2
10442816	Lmf1
10431528	Lmf2
10435193	Lmln
10455813	Lmnb1
10502510	Lmo4
10477004	LOC100044416
10539263	Loxl3
10513256	Lpar1
10573939	Lpcat2
10573234	Lphn1
10446656	Lpin2
10572130	Lpl
10546510	Lrig1
10473880	Lrp4
10529445	Lrpap1
10595109	Lrrc1
10408280	Lrrc16a
10435654	Lrrc58
10380403	Lrrc59
10523758	Lrrc8b
10523766	Lrrc8c
10523772	Lrrc8d
10444595	Lsm2
10498576	Lxn
10521555	Lyar
10538832	Mad2l1
10425283	Maff
10605766	Maged1
10487447	Mall
10599962	Mamld1
10517287	Man1c1
10564909	Man2a2
10573583	Man2b1
10496302	Manba
10596575	Manf
10594447	Map2k1
10443408	Mapk13
10557459	Mapk3
10459747	Mapk4
10357579	Mapkapk2
10477353	Mapre1
10520544	Mapre3
10560510	Mark4
10438708	Masp1
10515295	Mast2
10480432	Mastl
10417053	Mbnl2
10584674	Mcam
10479811	Mcm10
10353420	Mcm3
10437945	Mcm4
10572906	Mcm5
10476362	Mcm8
10444911	Mdc1
10384603	Mdh1
10526381	Mdh2
10485070	Mdk
10492231	Med12l
10473343	Med19
10470696	Med27
10406434	Mef2c
10504470	Melk
10554704	Mesdc2
10366796	Mettl1
10564713	Mfge8
10349404	Mgat5
10561187	Mia1
10556381	Mical2
10602068	Mid2
10518372	Miip
10462504	Minpp1
10349510	Mir128-1
10471880	Mir181b-2
10542221	Mir680-1
10568714	Mki67
10507218	Mknk1
10532944	Mlec
10532954	Mlec
10571680	Mlf1ip
10448582	Mlst8
10579852	Mmaa
10535331	Mmd2
10574350	Mmp15
10573924	Mmp2
10606876	Morf4l2
10500911	Mov10
10582074	Mphosph6
10533781	Mphosph9
10593937	Mpi
10538253	Mpp6
10584827	Mpzl2
10595981	Mras
10595979	Mras
10456587	Mro
10428690	Mrpl13
10447880	Mrpl18
10372078	Mrpl42
10570827	Mrps31
10436941	Mrps6
10524684	Msi1
10361956	Mtap7
10424188	Mtbp
10545672	Mthfd2
10599976	Mtm1
10361366	Mtrf1l
10410393	Mtrr
10575497	Mtss1l
10578324	Mtus1
10601980	Mum1l1
10504902	Murc
10545921	Mxd1
10468517	Mxi1
10393379	Mxra7
10378088	Mybbp1a
10353010	Mybl1
10487033	Myef2
10430201	Myh9
10423293	Myo10
10378914	Myo18a
10565634	Myo7a
10390153	Myst2
10580457	N4bp1
10436698	N6amt1
10580188	Nacc1
10511084	Nadk
10358091	Nav1
10381419	Nbr1
10547943	Ncapd2
10583952	Ncapd3
10521731	Ncapg
10487340	Ncaph
10491083	Nceh1
10368534	Ncoa7
10360205	Ncstn
10452709	Ndc80
10489065	Ndrg3
10517883	Necap2
10408850	Nedd9
10578690	Neil3
10352767	Nek2
10553450	Nell1
10580382	Neto2
10433096	Nfe2
10409278	Nfil3
10504017	Nfx1
10361869	Nhsl1
10361882	Nhsl1
10403584	Nid1
10522368	Nipal1
10418578	Nisch
10410547	Nkd2
10416195	Nkx3-1
10389865	Nme1
10389858	Nme2
10482517	Nmi
10512165	Nol6
10553163	Nomo1
10409338	Nop16
10476093	Nop56
10401519	Npc2
10358879	Npl
10393774	Nploc4
10499811	Npr1
10427035	Nr4a1
10482237	Nr5a1
10429754	Nrbp2
10506893	Nrd1
10600082	Nsdhl
10352709	Nsl1
10413710	Nt5dc2
10365518	Nt5dc3
10587639	Nt5e
10552938	Ntf5
10428412	Nudcd1
10526972	Nudt1
10598236	Nudt11
10562480	Nudt19
10372082	Nudt4
10359890	Nuf2
10378902	Nufip2
10372687	Nup107
10582599	Nup133
10473650	Nup160
10537246	Nup205
10361651	Nup43
10382542	Nup85
10574033	Nup93
10474984	Nusap1
10354418	Obfc2a
10599435	Ocrl
10470788	Odf2
10556076	Olfml1
10500808	Olfml3
10373036	Os9
10461690	Osbp
10573027	Otud4
10422608	Oxct1
10525439	P2rx4
10363350	P4ha1
10393823	P4hb
10509838	Padi2
10602198	Pak3
10510957	Pank4
10505489	Pappa
10496110	Papss1
10462507	Papss2
10478907	Pard6b
10416037	Pbk
10524004	Pcgf3
10544570	Pcnp
10370127	Pcnt
10534862	Pcolce
10466530	Pcsk5
10553967	Pcsk6
10460400	Pcx
10360983	Pdcd5
10555510	Pde2a
10495794	Pde5a
10554521	Pde8a
10443786	Pde9a
10535043	Pdgfa
10578322	Pdgfrl
10544525	Pdia4
10439218	Pdia5
10394735	Pdia6
10605711	Pdk3
10467420	Pdlim1
10502469	Pdlim5
10511580	Pdp1
10518147	Pdpn
10468789	Pdzd8
10533085	Pebp1
10552125	Pepd
10387222	Pfas
10458334	Pfdn1
10384015	Pgam2
10555671	Pgap2
10582649	Pgbd5
10595466	Pgm3
10442454	Pgp
10579335	Pgpep1
10491860	Phf17
10602474	Phf8
10350146	Phlda3
10592891	Phldb1
10425267	Pick1
10379163	Pigs
10595924	Pik3cb
10466779	Pip5k1b
10533751	Pitpnm2
10490794	Pkia
10585932	Pkm2
10580010	Pkn1
10472212	Pkp4
10514405	Plaa
10533131	Plbd2
10486119	Plcb2
10462922	Plce1
10478219	Plcg1
10473097	Plekha3
10370983	Plekhj1
10557156	Plk1
10491805	Plk4
10587829	Plod2
10526520	Plod3
10546184	Plxna1
10372028	Plxnc1
10365574	Pmch
10490159	Pmepa1
10499366	Pmf1
10364251	Pofut2
10465282	Pola2
10565862	Pold3
10524169	Pole
10400649	Pole2
10513622	Pole3
10435581	Polq
10539042	Polr1a
10454478	Polr2d
10551841	Polr2i
10526482	Polr2j
10479736	Polr3k
[truncated: 5,657 more rows]

## Sheet: (B) Permutation tests
	Permutation test results				Number of genes in the actual list	False positive percentage
Gene lists	Mean number of transcript ID's	Median number of transcript ID's	Mean number of genes	Median number of genes
♂ E11.5 supporting cell	90.76	29	87.86	29	564	15.578
♀ E11.5 supporting cell	68.735	29	66.32	29	367	18.0708
♂ E11.5 interstitium/stroma	28.005	29	26.62	26	46	57.8696
♀ E11.5 interstitium/stroma	28.295	29	27.045	27	30	90.15
♂ E11.5 germ cell	17.875	14	17.31	13	38	45.5526
♀ E11.5 germ cell	19.065	14	18.525	13	40	46.3125
♂ E12.5 supporting cell	192.375	16	183.445	16	1436	12.7747
♀ E12.5 supporting cell	211.575	18	203.6	17	1122	18.1462
♂ E12.5 interstitium/stroma	51.015	20	49.025	19	374	13.1083
♀ E12.5 interstitium/stroma	58.265	20	55.905	19	336	16.6384
♂ E12.5 germ cell	42.635	9	39.92	9	231	17.2814
♀ E12.5 germ cell	37.38	9	34.935	9	358	9.75838
♂ E13.5 supporting cell	195.52	8	186.995	8	1450	12.8962
♀ E13.5 supporting cell	129.985	7	124.115	7	1225	10.1318
♂ E13.5 interstitium/stroma	64.32	20	62.2	18	562	11.0676
♀ E13.5 interstitium/stroma	69.3	19	66.9	18	426	15.7042
♂ E13.5 germ cell	99.395	17	94.935	15	991	9.57972
♀ E13.5 germ cell	158.195	18	150.38	17	1007	14.9335

## Sheet: (C) Gene lists
Identically enriched in ♂ supporting and interstitial cells
E12.5		E13.5
Transcript cluster ID	Gene name	Transcript cluster ID	Gene name
10427049	6030408B16Rik	10427049	6030408B16Rik
10350840	Angptl1	10466304	Dtx4
10497920	Ankrd50	10507612	Lepre1
10448925	Cacna1h	10494595	Notch2
10469581	Etl4	10582649	Pgbd5
10353192	Eya1
10585398	Gldn
10345065	Gsta3
10403229	Itgb8
10372028	Plxnc1
10410039	Ptch1
10506254	Raver2
10533145	Tpcn1
10441497	Tulp4
10410931	Vcan
10524878	Vsig10
10346878	Zdbf2
Identically enriched in ♀ supporting and stromal cells
E12.5		E13.5
Transcript cluster ID	Gene name	Transcript cluster ID	Gene name
10584595	2610203C20Rik	10584595	2610203C20Rik
10433709	2900011O08Rik	10404376	Agtr1a
10455919	Adamts19	10485643	AI314831
10485643	AI314831	10502050	Alpk1
10586865	Aldh1a2	10600180	Atp2b3
10439612	Boc	10439612	Boc
10435948	Ccdc80	10469404	Cacnb2
10513190	D630039A03Rik	10503416	Calb1
10464400	E330013P04Rik	10540359	Cntn4
10559179	E330027M22Rik	10453747	Colec12
10428912	Fam84b	10445544	Crip3
10491732	Fat4	10464400	E330013P04Rik
10560481	Fosb	10559179	E330027M22Rik
10453857	Gata6	10568436	Fgfr2
10347277	Igfbp2	10530421	Gabra4
10536611	Kcnd2	10522324	Gabrb1
10472034	Lypd6	10453857	Gata6
10519913	Magi2	10438891	Gm1968
10437885	Myh11	10564237	Gm9801
10578649	Odz3	10442829	Gng13
10498018	Pcdh18	10580577	Irx3
10400170	Prkd1	10536611	Kcnd2
10519717	Sema3a	10529937	Kcnip4
10583242	Sesn3	10522075	Klhl5
10344897	Sulf1	10446928	Ltbp1
10460057	Tshz1	10472034	Lypd6
10543306	Tspan12	10519913	Magi2
10431017	Ttll1	10531370	Naaa
10548163	Tulp3	10529656	Nsg1
		10468869	Prdx3
		10519717	Sema3a
		10359161	Soat1
		10571567	Sorbs2
		10344897	Sulf1
		10443089	Syngap1 §
		10443095	Syngap1 §
		10413542	Tkt
		10460057	Tshz1
		10509273	Wnt4
		10456756	Zbtb7c
		10490777	Zfhx4
		10559790	Zim1
"§" indicates genes considered "♀ E13.5 over-expressed in all cell types."
Identically enriched in ♂ interstitial and germ cells
E12.5		E13.5
Transcript cluster ID	Gene name	Transcript cluster ID	Gene name
---		10355403	Fn1
		10571601	Pdlim3
Identically enriched in ♀ stromal and germ cells
E12.5		E13.5
Transcript cluster ID	Gene name	Transcript cluster ID	Gene name
---		---
Identically enriched in ♂ supporting and germ cells
E12.5		E13.5
Transcript cluster ID	Gene name	Transcript cluster ID	Gene name
10467420	Pdlim1	10410302	E130120F12Rik
10489484	Sdc4	10516994	Fam76a
		10523674	Nudt9
		10442057	Riok2
		10580274	Rnaseh2a
		10436945	Slc5a3
		10566326	Trim12
		10393098	Wbp2
Identically enriched in ♀ supporting and germ cells
E12.5		E13.5
Transcript cluster ID	Gene name	Transcript cluster ID	Gene name
---		10401267	Dcaf5
		10570437	Fbxo25
		10502240	Npnt
