# Supplementary material for: Temporal Transcriptional Profiling of Somatic and Germ Cells Reveals Biased Lineage Priming of Sexual Fate in the Fetal Mouse Gonad
Source: PLoS Genet. 2012 Mar 15;8(3):e1002575. doi: 10.1371/journal.pgen.1002575 (PMC3305395; doi:10.1371/journal.pgen.1002575)
Supplement: Dataset S4 — Germ cell and supporting cell primed gene lists, permutation tests, and GO term enrichment. (A and B) Gene lists generated by multiple pairwise comparisons to identify germ cell (A) and supporting cell (B) primed genes, graphically illustrated in Figure 4 and Figure 5. Genes are in alphabetical order. The gene lists are arranged by method of identifying primed genes, and sex. The genes with similar and intermediate expression are provided after each list of primed genes. “§” next to a gene name indicates its transcript clusters appeared in both the similar and intermediate expression lists, and so was counted in Figure 4 and Figure 5 as “Other”. (C) Results of permutation tests for the lists of primed genes. (D) The lists of biological process (“BP”) and molecular function (“MF”) GO terms enriched with a p-value<0.05 in all of the primed genes with similar expression (Figure 4J, Figure 5I). The lists are arranged in order of lineage and sex. The terms in the lists are ranked from lowest to highest p-value. (XLSX) [file pgen.1002575.s004.xlsx]

## Sheet: (A) Gene lists
Germ cell primed
♂		♀
Transcript cluster ID	Gene name	Transcript cluster ID	Gene name
10421672	1200011I18Rik	10472925	1700011J10Rik
10378453	1300001I01Rik	10604643	1700013H16Rik
10478847	1500012F01Rik	10368508	2610036L11Rik
10354534	1700019A02Rik	10586448	2810417H13Rik
10493626	1700094D03Rik	10599680	3830403N18Rik
10578964	1810029B16Rik	10554325	5730590G19Rik
10382838	1810032O08Rik	10606217	Abcb7
10506781	2010305A19Rik	10607116	Ammecr1
10543226	2610001J05Rik	10518561	Apitd1
10453555	2610044O15Rik	10592023	Aplp2
10440077	2610528E23Rik	10480381	Arhgap21
10396237	2700049A03Rik	10467041	Asah2
10350848	2810025M15Rik	10465844	Asrgl1
10542885	2810474O19Rik	10379363	Atad5
10535084	3110082I17Rik	10386070	Atox1
10551423	4933426I21Rik	10359689	Atp1b1
10416736	6720463M24Rik	10600777	AU015836
10590860	9030420J04Rik	10355327	Bard1
10590844	9030420J04Rik	10355329	Bard1
10566346	9230105E10Rik	10539435	Bola3
10536635	A430107O13Rik	10544219	Braf
10355554	Aamp	10395831	Brms1l
10450648	Abcf1	10586118	Calml4
10502951	Acadm	10603708	Cask
10445796	AI314976	10578557	Ccdc111
10367634	Akap12	10562563	Ccne1
10386652	Aldh3a2	10503264	Ccne2
10570764	Alg11	10362896	Cd24a
10401795	Alkbh1	10453049	Cdc42ep3
10551865	Alkbh6	10381072	Cdc6
10582925	Alkbh8	10523563	Cds1
10426479	Ano6	10400350	Cfl2
10565102	Ap3b2	10377537	Chd3
10526754	Ap4m1	10387316	Chd3
10414522	Apex1	10592201	Chek1
10473965	Arhgap1	10402650	Cinp
10594001	Arid3b	10603289	Clcn5
10525397	Arpc3	10533659	Clip1
10406407	Arrdc3	10586110	Cln6
10576482	Arv1	10607585	Cnksr2
10519183	Atad3a	10376555	Cops3
10347193	Atic	10551836	Cox7a1
10572146	Atp6v1b2	10521602	Cpeb2
10547471	B4galnt3	10585438	Crabp1
10512129	B4galt1	10528102	Crot
10376787	B9d1	10440186	Crybg3
10444719	Bat3	10527233	Cyth3
10435897	BC027231	10599696	Ddx26b
10573578	BC056474	10511679	Decr1
10578746	BC088983	10438313	Dgcr8
10515396	Btbd19	10418096	Dlg5
10474769	Bub1b	10443598	Dnahc8
10451580	Bysl	10427704	Dnajc21
10400030	Bzw2	10389674	Dynll2
10527880	C030048B08Rik	10420877	Esco2
10436967	Cbr1	10349637	Fam72a
10506843	Cc2d1b	10524941	Fbxo21
10496605	Ccbl2	10419223	Fermt2
10498531	Ccnl1	10537394	Fmc1
10464825	Ccs	10495596	Frrs1
10568180	Cd2bp2	10555027	Gab2
10474229	Cd59a	10476989	Gins1
10591472	Cdc37	10403727	Gli3
10368762	Cdc40	10416655	Gm5465
10575052	Cdh1	10369102	Gm9766
10575034	Cdh3	10408321	Gmnn
10366814	Cdk4	10461844	Gnaq
10453006	Cebpz	10604576	Gpc3
10581363	Cenpt	10472162	Gpd2
10487109	Cep152	10485562	Hipk3
10475981	Chchd5	10404069	Hist1h1a
10524105	Chfr	10408081	Hist1h1b
10380699	Copz2	10404063	Hist1h2ab
10511207	Cpsf3l	10408266	Hist1h2ba
10388996	Crlf3	10376455	Hist3h2a
10478967	Cstf1	10509163	Id3
10478594	Ctsa	10564857	Idh2
10457071	Cyb5	10569344	Igf2
10461930	D030056L22Rik	10457606	Kctd1
10440427	D16Ertd472e	10594251	Kif23
10481420	D2Wsu81e	10520096	Klhl7
10541002	D6Wsu116e	10423593	Laptm4b
10357292	Ddx18	10494227	Lass2
10369630	Ddx21	10553301	Ldha
10409508	Ddx41	10607225	Lrch2
10579219	Ddx49	10485070	Mdk
10379779	Ddx52	10492231	Med12l
10525111	Ddx54	10564713	Mfge8
10384123	Ddx56	10598198	Mia3
10420155	Dhrs1	10473250	Mrpl18
10581577	Dhx38	10409314	Msx2
10463505	Dpcd	10414449	Mudeng
10480699	Dpp7	10502299	Nfkb1
10541515	Dppa3	10502240	Npnt
10436050	Dppa4	10482249	Nr6a1
10376603	Drg2	10371379	Nuak1
10571312	Dusp4	10562480	Nudt19
10377704	Dvl2	10568568	Oat
10472764	Dync1i2	10506822	Orc1l
10357590	Dyrk3	10422608	Oxct1
10455533	Eif1a	10407358	Paip1
10397332	Eif2b2	10556426	Parva
10430265	Eif3d	10363455	Pcbd1
10406817	Enc1	10462683	Pcgf5
10510546	Eno1	10502469	Pdlim5
10428619	Enpp2	10357535	Pfkfb2
10419198	Ero1l	10366346	Phlda1
10511560	Esrp1	10349834	Pik3c2b
10458213	Etf1	10472212	Pkp4
10395457	Etv1	10461093	Pla2g16
10438626	Etv5	10361771	Plagl1
10551173	Exosc5	10465521	Plcb3
10428579	Ext1	10575799	Plcg2
10351623	F11r	10496169	Ppa2
10437451	Fam100a	10551736	Ppp1r14a
10464218	Fam160b1	10536297	Ppp1r9a
10353794	Fam168b	10529824	Prom1
10519988	Fam185a	10576391	Rab4a
10543319	Fam3c	10535979	Rfc3
10516994	Fam76a	10591806	rp9
10346914	Fastkd2	10606445	Rps6ka6
10571530	Fat1	10378549	Rtn4rl1
10438017	Fgd4	10588243	Ryk
10568436	Fgfr2	10493820	S100a6
10530563	Fryl	10467979	Scd1
10392098	Ftsj3	10569129	Sct
10510254	Fv1	10432101	Senp1
10376230	G3bp1	10437180	Sh3bgr
10542200	Gabarapl1	10350590	Ska2l
10573430	Gadd45gip1	10522378	Slain2
10351035	Gas5	10521759	Slit2
10351037	Gas5	10414350	Socs4
10351039	Gas5	10555460	Stard10
10404702	Gcnt2	10492428	Tiparp
10600390	Gdi1	10586184	Tipin
10492480	Gfm1	10504891	Tmeff1
10567626	Gga2	10521566	Tmem128
10516484	Gjb3	10595000	Tmod3
10414093	Glud1	10355806	Tuba4a
10528480	Gm6560	10599222	Ube2a
10395198	Gm9359	10404700	Ubxn2a
10382243	Gna13	10555389	Ucp2
10596704	Gnai2	10445702	Usp49
10418480	Gnl3	10601854	Wbp5
10493120	Gpatch4	10475362	Wdr76
10520800	Gpn1	10478525	Wfdc2
10588899	Gpx1	10604656	Xlr
10594835	Grinl1a	10553336	Zdhhc13
10496621	Gtf2b	10571399	Zdhhc2
10368739	Gtf3c6	10600150	Zfp275
10580875	Gtl3	10505073	Zfp462
10552945	Gys1	10457587	Zfp521
10473976	Harbi1	10583825	Zfp809
10458398	Hars
10454993	Hars2
10513020	Ikbkap
10506058	Inadl
10541771	Ing4
10420035	Ipo4
10587495	Irak1bp1
10376060	Irf1
10385500	Irgm1
10493103	Isg20l2
10572432	Isyna1
10445909	Kat2b
10417798	Kcnk5
10602704	Klf8
10366350	Krr1
10439471	Ktelc1
10376312	Larp1
10352302	Lefty2
10422822	Lifr
10438592	Liph
10455813	Lmnb1
10510464	Lzic
10582094	Mbtps1
10512709	Mcart1
10497773	Mccc1
10384603	Mdh1
10454212	Mep1b
10493245	Mex3a
10416950	Mir18
10367120	Mir677
10544186	Mkrn1
10531146	Mkrn1-ps1
10396372	Mnat1
10582074	Mphosph6
10461663	Mrpl16
10545576	Mrpl19
10376320	Mrpl22
10380751	Mrpl45
10564692	Mrpl46
10353213	Msc
10461334	Mta2
10378088	Mybbp1a
10452639	Myl12b
10423293	Myo10
10580131	Nanos3
10485483	Nat10
10381668	Nmt1
10581547	Nob1
10467344	Noc3l
10394749	Nol10
10512165	Nol6
10510629	Nol9
10520417	Nom1
10409338	Nop16
10541845	Nop2
10476093	Nop56
10358210	Nr5a2
10405971	Nsun2
10375234	Nudcd2
10416510	Nufip1
10422854	Nup155
10365578	Nup37
10511661	Otud6b
10545917	Pcbp1
10596053	Pccb
10463751	Pdcd11
10480035	Pfkfb3
10585932	Pkm2
10433887	Pkp2
10517655	Pla2g5
10511498	Plekhf2
10430794	Pmm1
10384474	Pno1
10374793	Pnpt1
10370708	Polr2e
10423629	Pop1
10444853	Pou5f1
10583496	Ppan
10492671	Ppid
10396358	Ppm1a
10442155	Ppp2r1a
10585249	Ppp2r1b
10463517	Pprc1
10507784	Ppt1
10510061	Pramef8
10368970	Prdm1
10468869	Prdx3
10583788	Prkcsh
10563014	Prmt1
10419759	Prmt5
10393309	Prpsap1
10380815	Psmb3
10482229	Psmb7
10397741	Psmc1
10525506	Psmd9
10456414	Psmg2
10364518	Ptbp1
10533285	Ptpn11
10528507	Pus7
10352306	Pycr2
10372583	Rab3ip
10502934	Rabggtb
10430748	Rangap1
10387219	Rangrf
10543551	Rbm28
10373340	Rbms2
10509820	Rcc2
10462346	Rcl1
10350733	Rgs16
10432362	Rhebl1
10534021	Rimbp2
10404630	Riok1
10442057	Riok2
10355628	Rnf25
10368730	Rpf2
10451472	Rpl7l1
10585703	Rpp25
10479749	Rpp38
10368277	Rps12
10542872	Rps4y2
10441565	Rps6ka2
10360934	Rrp15
10588522	Rrp9
10449687	Rsph1
10480145	Rsu1
10363599	Rufy2
10563275	Ruvbl2
10571728	Rwdd4a
10534142	Sbds
10578916	Sc4mol
10526098	Scand3
10500091	Scnm1
10389719	Scpep1
10412981	Sec24c
10498319	Serp1
10464974	Sf3b2
10405236	Sfxn1
10576883	Shcbp1
10386604	Shmt1
10546710	Shq1
10400971	Six4
10427606	Skp2
10387922	Slc25a11
10507594	Slc2a1
10380524	Slc35b1
10465772	Slc3a2
10540122	Slc6a6
10581473	Slc7a6os
10382462	Slc9a3r1
10370025	Smarcb1
10505630	Snapc3
10461152	Snhg1
10461156	Snhg1
10508721	Snora44
10516908	Snora73a
10516906	Snora73b
10565811	Snord15b
10461162	Snord22
10515425	Snord38a
10351043	Snord47
10450363	Snord52
10576216	Snord68
10375501	Snord95
10375499	Snord96a
10418475	Spcs1
10567838	Spns1
10374455	Spred2
10373355	Spryd4
10455695	Srfbp1
10510391	Srm
10465220	Sssca1
10512443	Stoml2
10557793	Stx4a
10344897	Sulf1
10388786	Supt6h
10583312	Taf1d
10582642	Taf5l
10465790	Taf6l
10444068	Tapbp
10427772	Tars
10521927	Tbc1d19
10384192	Tbrg4
10456522	Tcf4
10437384	Tcfap4
10402514	Tcl1
10459109	Tcof1
10556442	Tead1
10556456	Tead1
10369690	Tet1
10369688	Tet1
10369702	Tet1
10385375	Thg1l
10473363	Timm10
10576857	Timm44
10441511	Tmem181a
10579799	Tmem184c
10572038	Tmem192
10452468	Tmem232
10560630	Tomm40
10550734	Tomm40
10350792	Tor1aip2
10471072	Tor1b
10566529	Tpp1
10566326	Trim12
10415784	Trim13
10578393	Triml1
10571522	Triml2
10368511	Trmt11
10487969	Trmt6
10357124	Tsn
10378508	Tsr1
10381250	Tubg1
10461354	Tut1
10522208	Uchl1
10505187	Ugcg
10576403	Urb2
10558580	Utf1
10388971	Utp6
10444605	Vars
10368011	Vta1
10393098	Wbp2
10529689	Wdr1
10355037	Wdr12
10513592	Wdr31
10446693	Wdr43
10454984	Wdr55
10374430	Wdr92
10578623	Wwc2
10576728	Xab2
10420390	Xpo4
10445458	Xpo5
10347232	Xrcc5
10469732	Yme1l1
10585022	Zfp259
10400109	Zfp277
10583402	Zfp317
10561453	Zfp36
10513544	Zfp37
10561831	Zfp566
10573008	Zfp827
10478590	Zswim1
Germ cell primed, similar expression
♂		♀
Transcript cluster ID	Gene name	Transcript cluster ID	Gene name
10421672	1200011I18Rik	10472925	1700011J10Rik
10378453	1300001I01Rik	10368508	2610036L11Rik
10478847	1500012F01Rik	10554325	5730590G19Rik
10354534	1700019A02Rik	10606217	Abcb7
10493626	1700094D03Rik	10607116	Ammecr1
10382838	1810032O08Rik	10592023	Aplp2
10506781	2010305A19Rik	10480381	Arhgap21
10543226	2610001J05Rik	10467041	Asah2
10453555	2610044O15Rik	10379363	Atad5
10440077	2610528E23Rik	10359689	Atp1b1
10396237	2700049A03Rik	10600777	AU015836
10350848	2810025M15Rik	10355327	Bard1
10535084	3110082I17Rik	10539435	Bola3
10551423	4933426I21Rik	10544219	Braf
10416736	6720463M24Rik	10578557	Ccdc111
10590860	9030420J04Rik	10562563	Ccne1
10590844	9030420J04Rik	10453049	Cdc42ep3
10355554	Aamp	10381072	Cdc6
10450648	Abcf1	10523563	Cds1
10502951	Acadm	10400350	Cfl2
10386652	Aldh3a2	10377537	Chd3
10570764	Alg11	10387316	Chd3
10551865	Alkbh6	10607585	Cnksr2
10582925	Alkbh8	10376555	Cops3
10426479	Ano6	10551836	Cox7a1
10565102	Ap3b2	10528102	Crot
10526754	Ap4m1	10440186	Crybg3
10414522	Apex1	10527233	Cyth3
10473965	Arhgap1	10599696	Ddx26b
10594001	Arid3b	10511679	Decr1
10525397	Arpc3	10438313	Dgcr8
10519183	Atad3a	10427704	Dnajc21
10347193	Atic	10389674	Dynll2
10572146	Atp6v1b2	10349637	Fam72a
10547471	B4galnt3	10524941	Fbxo21
10376787	B9d1	10537394	Fmc1
10435897	BC027231	10495596	Frrs1
10573578	BC056474	10555027	Gab2
10578746	BC088983	10476989	Gins1
10515396	Btbd19	10403727	Gli3
10474769	Bub1b	10416655	Gm5465
10451580	Bysl	10408321	Gmnn
10400030	Bzw2	10461844	Gnaq
10527880	C030048B08Rik	10604576	Gpc3
10436967	Cbr1	10472162	Gpd2
10496605	Ccbl2	10485562	Hipk3
10464825	Ccs	10404069	Hist1h1a
10568180	Cd2bp2	10408081	Hist1h1b
10474229	Cd59a	10404063	Hist1h2ab
10591472	Cdc37	10376455	Hist3h2a
10368762	Cdc40	10509163	Id3
10575034	Cdh3	10564857	Idh2
10453006	Cebpz	10457606	Kctd1
10581363	Cenpt	10520096	Klhl7
10487109	Cep152	10423593	Laptm4b
10524105	Chfr	10494227	Lass2
10380699	Copz2	10553301	Ldha
10511207	Cpsf3l	10607225	Lrch2
10388996	Crlf3	10564713	Mfge8
10478594	Ctsa	10598198	Mia3
10461930	D030056L22Rik	10409314	Msx2
10440427	D16Ertd472e	10414449	Mudeng
10481420	D2Wsu81e	10502240	Npnt
10357292	Ddx18	10371379	Nuak1
10369630	Ddx21	10562480	Nudt19
10409508	Ddx41	10568568	Oat
10579219	Ddx49	10506822	Orc1l
10379779	Ddx52	10422608	Oxct1
10384123	Ddx56	10407358	Paip1
10420155	Dhrs1	10556426	Parva
10463505	Dpcd	10363455	Pcbd1
10480699	Dpp7	10462683	Pcgf5
10436050	Dppa4	10357535	Pfkfb2
10376603	Drg2	10366346	Phlda1
10571312	Dusp4	10472212	Pkp4
10377704	Dvl2	10461093	Pla2g16
10472764	Dync1i2	10465521	Plcb3
10357590	Dyrk3	10551736	Ppp1r14a
10430265	Eif3d	10536297	Ppp1r9a
10510546	Eno1	10529824	Prom1
10511560	Esrp1	10535979	Rfc3
10395457	Etv1	10378549	Rtn4rl1
10551173	Exosc5	10588243	Ryk
10351623	F11r	10493820	S100a6
10437451	Fam100a	10467979	Scd1
10464218	Fam160b1	10569129	Sct
10353794	Fam168b	10432101	Senp1
10519988	Fam185a	10521759	Slit2
10516994	Fam76a	10414350	Socs4
10346914	Fastkd2	10555460	Stard10
10571530	Fat1	10504891	Tmeff1
10438017	Fgd4	10521566	Tmem128
10568436	Fgfr2	10595000	Tmod3
10530563	Fryl	10404700	Ubxn2a
10510254	Fv1	10555389	Ucp2
10542200	Gabarapl1	10445702	Usp49
10573430	Gadd45gip1	10475362	Wdr76
10351037	Gas5	10478525	Wfdc2
10351039	Gas5	10600150	Zfp275
10351035	Gas5	10457587	Zfp521
10404702	Gcnt2	10583825	Zfp809
10600390	Gdi1
10567626	Gga2
10516484	Gjb3
10414093	Glud1
10395198	Gm9359
10596704	Gnai2
10418480	Gnl3
10493120	Gpatch4
10520800	Gpn1
10588899	Gpx1
10594835	Grinl1a
10368739	Gtf3c6
10473976	Harbi1
10454993	Hars2
10513020	Ikbkap
10506058	Inadl
10541771	Ing4
10420035	Ipo4
10587495	Irak1bp1
10376060	Irf1
10493103	Isg20l2
10445909	Kat2b
10417798	Kcnk5
10366350	Krr1
10439471	Ktelc1
10352302	Lefty2
10422822	Lifr
10438592	Liph
10455813	Lmnb1
10510464	Lzic
10582094	Mbtps1
10512709	Mcart1
10497773	Mccc1
10384603	Mdh1
10454212	Mep1b
10493245	Mex3a
10367120	Mir677
10531146	Mkrn1-ps1
10396372	Mnat1
10582074	Mphosph6
10461663	Mrpl16
10545576	Mrpl19
10376320	Mrpl22
10380751	Mrpl45
10564692	Mrpl46
10353213	Msc
10461334	Mta2
10378088	Mybbp1a
10452639	Myl12b
10423293	Myo10
10580131	Nanos3
10485483	Nat10
10581547	Nob1
10467344	Noc3l
10394749	Nol10
10512165	Nol6
10510629	Nol9
10520417	Nom1
10409338	Nop16
10541845	Nop2
10358210	Nr5a2
10405971	Nsun2
10375234	Nudcd2
10416510	Nufip1
10422854	Nup155
10365578	Nup37
10511661	Otud6b
10545917	Pcbp1
10596053	Pccb
10463751	Pdcd11
10480035	Pfkfb3
10585932	Pkm2
10433887	Pkp2
10517655	Pla2g5
10511498	Plekhf2
10430794	Pmm1
10374793	Pnpt1
10370708	Polr2e
10423629	Pop1
10492671	Ppid
10396358	Ppm1a
10442155	Ppp2r1a
10585249	Ppp2r1b
10463517	Pprc1
10507784	Ppt1
10510061	Pramef8
10368970	Prdm1
10468869	Prdx3
10583788	Prkcsh
10563014	Prmt1
10419759	Prmt5
10482229	Psmb7
10397741	Psmc1
10525506	Psmd9
10456414	Psmg2
10533285	Ptpn11
10528507	Pus7
10352306	Pycr2
10372583	Rab3ip
10502934	Rabggtb
10387219	Rangrf
10543551	Rbm28
10509820	Rcc2
10350733	Rgs16
10404630	Riok1
10442057	Riok2
10355628	Rnf25
10451472	Rpl7l1
10585703	Rpp25
10479749	Rpp38
10368277	Rps12
10542872	Rps4y2
10441565	Rps6ka2
10360934	Rrp15
10449687	Rsph1
10480145	Rsu1
10363599	Rufy2
10563275	Ruvbl2
10534142	Sbds
10578916	Sc4mol
10500091	Scnm1
10389719	Scpep1
10412981	Sec24c
10464974	Sf3b2
10405236	Sfxn1
10576883	Shcbp1
10386604	Shmt1
10546710	Shq1
10400971	Six4
10387922	Slc25a11
10507594	Slc2a1
10380524	Slc35b1
10540122	Slc6a6
10581473	Slc7a6os
10505630	Snapc3
10461152	Snhg1
10461156	Snhg1
10508721	Snora44
10565811	Snord15b
10461162	Snord22
10515425	Snord38a
10351043	Snord47
10450363	Snord52
10375501	Snord95
10375499	Snord96a
10418475	Spcs1
10374455	Spred2
10373355	Spryd4
10455695	Srfbp1
10510391	Srm
10465220	Sssca1
10512443	Stoml2
10557793	Stx4a
10344897	Sulf1
10583312	Taf1d
10582642	Taf5l
10465790	Taf6l
10444068	Tapbp
10427772	Tars
10521927	Tbc1d19
10384192	Tbrg4
10456522	Tcf4
10437384	Tcfap4
10402514	Tcl1
10459109	Tcof1
10556456	Tead1
10556442	Tead1
10369690	Tet1
10369688	Tet1
10369702	Tet1
10385375	Thg1l
10473363	Timm10
10576857	Timm44
10441511	Tmem181a
10579799	Tmem184c
10572038	Tmem192
10452468	Tmem232
10550734	Tomm40
10350792	Tor1aip2
10471072	Tor1b
10415784	Trim13
10578393	Triml1
10571522	Triml2
10487969	Trmt6
10357124	Tsn
10378508	Tsr1
10381250	Tubg1
10505187	Ugcg
10576403	Urb2
10558580	Utf1
10444605	Vars
10393098	Wbp2
10529689	Wdr1
10513592	Wdr31
10446693	Wdr43
10454984	Wdr55
10374430	Wdr92
10578623	Wwc2
10347232	Xrcc5
10469732	Yme1l1
10585022	Zfp259
10400109	Zfp277
10583402	Zfp317
10561453	Zfp36
10561831	Zfp566
10573008	Zfp827
10478590	Zswim1
Germ cell primed, intermediate expression
♂		♀
Transcript cluster ID	Gene name	Transcript cluster ID	Gene name
10566346	9230105E10Rik	10604643	1700013H16Rik
10506843	Cc2d1b	10599680	3830403N18Rik
10575052	Cdh1	10603708	Cask
10541515	Dppa3	10503264	Ccne2
10428619	Enpp2	10603289	Clcn5
10428579	Ext1	10533659	Clip1
10496621	Gtf2b	10586110	Cln6
10385500	Irgm1	10443598	Dnahc8
10572432	Isyna1	10369102	Gm9766
10534021	Rimbp2	10502299	Nfkb1
10526098	Scand3	10361771	Plagl1
10566326	Trim12	10437180	Sh3bgr
10522208	Uchl1	10604656	Xlr
		10571399	Zdhhc2
Germ cell enriched & primed
♂		♀
Transcript cluster ID	Gene name	Transcript cluster ID	Gene name
10354534	1700019A02Rik	10604643	1700013H16Rik
10506781	2010305A19Rik	10599680	3830403N18Rik
10440077	2610528E23Rik	10554325	5730590G19Rik
10396237	2700049A03Rik	10355327	Bard1
10590844	9030420J04Rik	10355329	Bard1
10355554	Aamp	10578557	Ccdc111
10445796	AI314976	10562563	Ccne1
10565102	Ap3b2	10381072	Cdc6
10594001	Arid3b	10523563	Cds1
10347193	Atic	10592201	Chek1
10547471	B4galnt3	10607585	Cnksr2
10435897	BC027231	10551836	Cox7a1
10474769	Bub1b	10438313	Dgcr8
10451580	Bysl	10443598	Dnahc8
10527880	C030048B08Rik	10427704	Dnajc21
10575052	Cdh1	10420877	Esco2
10453006	Cebpz	10408321	Gmnn
10581363	Cenpt	10492231	Med12l
10524105	Chfr	10409314	Msx2
10511207	Cpsf3l	10482249	Nr6a1
10478967	Cstf1	10462683	Pcgf5
10461930	D030056L22Rik	10575799	Plcg2
10481420	D2Wsu81e	10569129	Sct
10357292	Ddx18	10432101	Senp1
10369630	Ddx21	10437180	Sh3bgr
10480699	Dpp7	10355806	Tuba4a
10541515	Dppa3	10475362	Wdr76
10436050	Dppa4	10478525	Wfdc2
10357590	Dyrk3	10604656	Xlr
10511560	Esrp1	10553336	Zdhhc13
10551173	Exosc5
10519988	Fam185a
10543319	Fam3c
10392098	Ftsj3
10351039	Gas5
10404702	Gcnt2
10516484	Gjb3
10418480	Gnl3
10520800	Gpn1
10588899	Gpx1
10420035	Ipo4
10445909	Kat2b
10417798	Kcnk5
10602704	Klf8
10438592	Liph
10454212	Mep1b
10416950	Mir18
10544186	Mkrn1
10531146	Mkrn1-ps1
10378088	Mybbp1a
10580131	Nanos3
10485483	Nat10
10467344	Noc3l
10510629	Nol9
10520417	Nom1
10409338	Nop16
10541845	Nop2
10405971	Nsun2
10416510	Nufip1
10365578	Nup37
10463751	Pdcd11
10511498	Plekhf2
10430794	Pmm1
10374793	Pnpt1
10370708	Polr2e
10423629	Pop1
10444853	Pou5f1
10583496	Ppan
10492671	Ppid
10585249	Ppp2r1b
10463517	Pprc1
10419759	Prmt5
10456414	Psmg2
10372583	Rab3ip
10387219	Rangrf
10509820	Rcc2
10432362	Rhebl1
10368730	Rpf2
10479749	Rpp38
10368277	Rps12
10542872	Rps4y2
10360934	Rrp15
10588522	Rrp9
10449687	Rsph1
10526098	Scand3
10386604	Shmt1
10546710	Shq1
10400971	Six4
10382462	Slc9a3r1
10461152	Snhg1
10516908	Snora73a
10516906	Snora73b
10461162	Snord22
10375501	Snord95
10567838	Spns1
10455695	Srfbp1
10510391	Srm
10582642	Taf5l
10402514	Tcl1
10369690	Tet1
10369688	Tet1
10369702	Tet1
10473363	Timm10
10578393	Triml1
10571522	Triml2
10368511	Trmt11
10487969	Trmt6
10378508	Tsr1
10461354	Tut1
10576403	Urb2
10558580	Utf1
10444605	Vars
10355037	Wdr12
10513592	Wdr31
10446693	Wdr43
10576728	Xab2
10420390	Xpo4
10445458	Xpo5
10347232	Xrcc5
10561831	Zfp566
10478590	Zswim1
Germ cell enriched & primed, similar expression
♂		♀
Transcript cluster ID	Gene name	Transcript cluster ID	Gene name
10354534	1700019A02Rik	10554325	5730590G19Rik
10506781	2010305A19Rik	10355327	Bard1
10440077	2610528E23Rik	10578557	Ccdc111
10396237	2700049A03Rik	10562563	Ccne1
10590844	9030420J04Rik	10381072	Cdc6
10355554	Aamp	10523563	Cds1
10565102	Ap3b2	10607585	Cnksr2
10594001	Arid3b	10551836	Cox7a1
10347193	Atic	10438313	Dgcr8
10547471	B4galnt3	10427704	Dnajc21
10435897	BC027231	10408321	Gmnn
10474769	Bub1b	10409314	Msx2
10451580	Bysl	10462683	Pcgf5
10527880	C030048B08Rik	10569129	Sct
10453006	Cebpz	10432101	Senp1
10581363	Cenpt	10475362	Wdr76
10524105	Chfr	10478525	Wfdc2
10511207	Cpsf3l
10461930	D030056L22Rik
10481420	D2Wsu81e
10357292	Ddx18
10369630	Ddx21
10480699	Dpp7
10436050	Dppa4
10357590	Dyrk3
10511560	Esrp1
10551173	Exosc5
10519988	Fam185a
10351039	Gas5
10404702	Gcnt2
10516484	Gjb3
10418480	Gnl3
10520800	Gpn1
10588899	Gpx1
10420035	Ipo4
10445909	Kat2b
10417798	Kcnk5
10438592	Liph
10454212	Mep1b
10531146	Mkrn1-ps1
10378088	Mybbp1a
10580131	Nanos3
10485483	Nat10
10467344	Noc3l
10510629	Nol9
10520417	Nom1
10409338	Nop16
10541845	Nop2
10405971	Nsun2
10416510	Nufip1
10365578	Nup37
10463751	Pdcd11
10511498	Plekhf2
10430794	Pmm1
10374793	Pnpt1
10370708	Polr2e
10423629	Pop1
10492671	Ppid
10585249	Ppp2r1b
10463517	Pprc1
10419759	Prmt5
10456414	Psmg2
10372583	Rab3ip
10387219	Rangrf
10509820	Rcc2
10479749	Rpp38
10368277	Rps12
10542872	Rps4y2
10360934	Rrp15
10449687	Rsph1
10386604	Shmt1
10546710	Shq1
10400971	Six4
10461152	Snhg1
10461162	Snord22
10375501	Snord95
10455695	Srfbp1
10510391	Srm
10582642	Taf5l
10402514	Tcl1
10369690	Tet1
10369688	Tet1
10369702	Tet1
10473363	Timm10
10578393	Triml1
10571522	Triml2
10487969	Trmt6
10378508	Tsr1
10576403	Urb2
10558580	Utf1
10444605	Vars
10513592	Wdr31
10446693	Wdr43
10347232	Xrcc5
10561831	Zfp566
10478590	Zswim1
Germ cell enriched & primed, intermediate expression
♂		♀
Transcript cluster ID	Gene name	Transcript cluster ID	Gene name
10575052	Cdh1	10604643	1700013H16Rik
10541515	Dppa3	10599680	3830403N18Rik
10526098	Scand3	10443598	Dnahc8
		10437180	Sh3bgr
		10604656	Xlr
Germ cell depleted & primed
♂		♀
Transcript cluster ID	Gene name	Transcript cluster ID	Gene name
10591022	4931406C07Rik	10523670	Aff1
10607089	Acsl4	10601768	Armcx4
10546454	Adamts9	10601360	Atp7a
10546450	Adamts9	10542310	Cdkn1b
10455259	Arhgap26	10509441	Ece1
10464251	Atrnl1	10416657	Elf1
10475414	B2m	10369481	H2afy2
10593856	C230081A13Rik	10368380	L3mbtl3
10603708	Cask	10467139	Lipa
10367436	Cd63	10412345	Parp8
10457644	Cdh2	10500295	Plekho1
10569429	Cdkn1c	10496338	Ppp3ca
10440307	Chmp2b	10370072	Prmt2
10533659	Clip1	10406598	Serinc5
10388591	Cpd	10604347	Smarca1
10496727	Ddah1	10485198	Tspan18
10507539	Elovl1
10600504	Fundc2
10370766	Gamt
10490203	Gnas
10436849	Ifnar1
10518585	Kif1b
10377982	Kif1c
10604528	Mbnl3
10520048	Mll5
10360848	Mosc2
10361098	Nenf
10575160	Nfat5
10496110	Papss1
10599200	Pgrmc1
10439710	Phldb2
10349081	Phlpp1
10567173	Pik3c2a
10551570	Sirt2
10483381	Stk39
10393559	Timp2
10516520	Zfp362
Germ cell depleted & primed, similar expression
♂		♀
Transcript cluster ID	Gene name	Transcript cluster ID	Gene name
10591022	4931406C07Rik	10523670	Aff1
10546454	Adamts9	10601768	Armcx4
10546450	Adamts9	10542310	Cdkn1b
10455259	Arhgap26	10416657	Elf1
10464251	Atrnl1	10369481	H2afy2
10475414	B2m	10368380	L3mbtl3
10593856	C230081A13Rik	10467139	Lipa
10367436	Cd63	10412345	Parp8
10457644	Cdh2	10500295	Plekho1
10569429	Cdkn1c	10496338	Ppp3ca
10440307	Chmp2b	10406598	Serinc5
10496727	Ddah1	10604347	Smarca1
10507539	Elovl1	10485198	Tspan18
10600504	Fundc2
10370766	Gamt
10490203	Gnas
10436849	Ifnar1
10377982	Kif1c
10604528	Mbnl3
10520048	Mll5
10360848	Mosc2
10361098	Nenf
10496110	Papss1
10439710	Phldb2
10349081	Phlpp1
10567173	Pik3c2a
10551570	Sirt2
10483381	Stk39
10393559	Timp2
10516520	Zfp362
Germ cell depleted & primed, intermediate expression
♂		♀
Transcript cluster ID	Gene name	Transcript cluster ID	Gene name
10603708	Cask	---
10533659	Clip1

## Sheet: (B) Gene lists
Supporting cell primed
♂		♀
Transcript cluster ID	Gene name	Transcript cluster ID	Gene name
10427049	6030408B16Rik	10497086	1810013D15Rik
10577757	Adam9	10603316	2010204K13Rik
10546452	Adamts9	10514070	2310067E19Rik
10546434	Adamts9	10584595	2610203C20Rik
10540207	Adamts9	10532896	2610524H06Rik
10485963	Arhgap11a	10523516	4930524J08Rik
10382998	Birc5	10470388	5930434B04Rik
10400589	C79407	10388042	6330403K07Rik
10376555	Cops3	10590844	9030420J04Rik
10581882	Ctrb1	10558227	Acadsb
10460468	Ctsf	10397148	Acot1
10413530	Dcp1a	10347748	Acsl3
10462217	Dmrt1	10384522	Actr2
10428672	Dscc1	10370471	Agpat3
10578352	Fgl1	10485643	AI314831
10503334	Gem	10441787	Airn
10562360	Gpi1	10379153	Aldoc
10381601	Grn	10560624	Apoe
10354598	Hecw2	10537834	Arhgef5
10578615	Ing2	10377804	Arrb2
10352798	Kcnh1	10428998	Asap1
10590494	Kif15	10543213	B630005N14Rik
10462632	Kif20b	10349102	Bcl2
10446771	Lclat1	10357043	Bcl2
10507612	Lepre1	10439612	Boc
10538832	Mad2l1	10360858	C130074G19Rik
10485070	Mdk	10521616	C1qtnf7
10499811	Npr1	10506225	Cachd1
10416037	Pbk	10537184	Cald1
10462922	Plce1	10360806	Capn2
10513622	Pole3	10536499	Cav1
10526482	Polr2j	10506843	Cc2d1b
10453715	Rab18	10369276	Ccdc109a
10369761	Reep3	10536827	Ccdc136
10508392	Rnf19b	10581013	Cdh11
10431051	Scube1	10588819	Cdhr4
10530059	Sel1l3	10377537	Chd3
10467068	Sgms1	10387316	Chd3
10456140	Sh3tc2	10524105	Chfr
10396936	Smoc1	10601303	Chic1
10350489	Uchl5	10574456	Cklf
10433904	Yars2	10537014	Cpa2
10423902	Zfpm2	10487645	Cpxm1
		10423836	Cthrc1
		10548727	D230041D01Rik
		10405693	Dapk1
		10409464	Dbn1
		10599696	Ddx26b
		10415176	Dhrs4
		10377725	Dlg4
		10596279	Dnajc13
		10547404	Erc1
		10550956	Ethe1
		10565315	Fah
		10350630	Fam129a
		10556491	Far1
		10545130	Gadd45a
		10351039	Gas5
		10453857	Gata6
		10389590	Gdpd1
		10601044	Gdpd2
		10359024	Gm5532
		10424347	Gm7691
		10445268	Gpr116
		10560945	Grik5
		10569341	H19
		10569335	H19
		10369481	H2afy2
		10358585	Hmcn1
		10358583	Hmcn1
		10358595	Hmcn1
		10358599	Hmcn1
		10358579	Hmcn1
		10358577	Hmcn1
		10358575	Hmcn1
		10358662	Hmcn1
		10358581	Hmcn1
		10358660	Hmcn1
		10358555	Hmcn1
		10358553	Hmcn1
		10358490	Hmcn1
		10358527	Hmcn1
		10358529	Hmcn1
		10358635	Hmcn1
		10358637	Hmcn1
		10436788	Hunk
		10558769	Ifitm1
		10395520	Immp2l
		10439138	Kalrn
		10434302	Klhl24
		10531899	Klhl8
		10423593	Laptm4b
		10416371	Lpar6
		10559207	Lsp1
		10408677	Lyrm4
		10579043	Lzts1
		10546476	Magi1
		10519913	Magi2
		10498076	Maml3
		10603746	Maob
		10509901	Mfap2
		10447617	Mir692-1
		10415052	Mmp14
		10359754	Mpzl1
		10381898	Mrc2
		10586781	Myo1e
		10587107	Myo5a
		10585982	Myo9a
		10565840	Neu3
		10573779	Nkd1
		10359970	Nos1ap
		10600707	Nr0b1
		10530615	Ociad2
		10605884	Ophn1
		10559377	Oraov1
		10555118	Pak1
		10463997	Pdcd4
		10583021	Pdgfd
		10559796	Peg3
		10522009	Pgm1
		10542522	Plekha5
		10561431	Plekhg2
		10500295	Plekho1
		10376950	Pmp22
		10400170	Prkd1
		10605465	Prkx
		10578986	Psd3
		10374934	Psme4
		10359339	Rabgap1l
		10486061	Rasgrp1
		10597531	Rbms3
		10344952	Rdh10
		10607658	Reps2
		10593205	Rexo2
		10399360	Rhob
		10602009	Rnf128
		10402117	Rps6ka5
		10552824	Rras
		10592585	Sc5d
		10519717	Sema3a
		10583242	Sesn3
		10484227	Sestd1
		10498064	Setd7
		10431915	Slc38a4
		10392259	Smurf2
		10545086	Snca
		10461158	Snhg1
		10461152	Snhg1
		10351043	Snord47
		10400336	Snx6
		10359161	Soat1
		10384885	Spnb2
		10568298	Stx1b
		10443089	Syngap1
		10583297	Taf1d
		10491038	Tbl1xr1
		10456522	Tcf4
		10464084	Tcf7l2
		10435048	Tctex1d2
		10504817	Tgfbr1
		10586039	Tle3
		10601701	Tmem35
		10457183	Tmx3
		10420596	Tnfrsf19
		10512499	Tpm2
		10362615	Traf3ip2
		10414805	Trav13d-4
		10399470	Trib2
		10358379	Trove2
		10478928	Tshz2
		10362487	Tspyl1
		10365658	Uhrf1bp1l
		10451198	Vegfa
		10547009	Vgll4
		10586616	Vps13c
		10498284	Wwtr1
		10372383	Zdhhc17
		10490777	Zfhx4
		10453272	Zfp36l2
		10557585	Zfp553
		10591164	Zfp558
		10410341	Zfp87
Supporting cell primed, similar expression
♂		♀
Transcript cluster ID	Gene name	Transcript cluster ID	Gene name
10577757	Adam9	10497086	1810013D15Rik
10540207	Adamts9 §	10603316	2010204K13Rik
10376555	Cops3	10514070	2310067E19Rik
10578352	Fgl1	10532896	2610524H06Rik
10503334	Gem	10523516	4930524J08Rik
10562360	Gpi1	10470388	5930434B04Rik
10381601	Grn	10558227	Acadsb
10578615	Ing2	10397148	Acot1
10446771	Lclat1	10347748	Acsl3
10485070	Mdk	10384522	Actr2
10462922	Plce1	10370471	Agpat3
10513622	Pole3	10485643	AI314831
10526482	Polr2j	10441787	Airn
10453715	Rab18	10379153	Aldoc
10369761	Reep3	10560624	Apoe
10431051	Scube1	10537834	Arhgef5
10467068	Sgms1	10377804	Arrb2
10396936	Smoc1	10543213	B630005N14Rik
10433904	Yars2	10349102	Bcl2
10423902	Zfpm2	10357043	Bcl2
		10360858	C130074G19Rik
		10521616	C1qtnf7
		10506225	Cachd1
		10537184	Cald1
		10369276	Ccdc109a
		10581013	Cdh11
		10588819	Cdhr4
		10377537	Chd3
		10524105	Chfr
		10601303	Chic1
		10574456	Cklf
		10537014	Cpa2
		10487645	Cpxm1
		10548727	D230041D01Rik
		10405693	Dapk1
		10409464	Dbn1
		10415176	Dhrs4
		10377725	Dlg4
		10596279	Dnajc13
		10550956	Ethe1
		10350630	Fam129a
		10556491	Far1
		10545130	Gadd45a
		10351039	Gas5
		10453857	Gata6
		10389590	Gdpd1
		10359024	Gm5532
		10424347	Gm7691
		10445268	Gpr116
		10569335	H19
		10358595	Hmcn1 §
		10358579	Hmcn1 §
		10358581	Hmcn1 §
		10358553	Hmcn1 §
		10436788	Hunk
		10558769	Ifitm1
		10395520	Immp2l
		10439138	Kalrn
		10434302	Klhl24
		10423593	Laptm4b
		10416371	Lpar6
		10559207	Lsp1
		10408677	Lyrm4
		10579043	Lzts1
		10546476	Magi1
		10498076	Maml3
		10447617	Mir692-1
		10359754	Mpzl1
		10381898	Mrc2
		10586781	Myo1e
		10585982	Myo9a
		10565840	Neu3
		10359970	Nos1ap
		10559377	Oraov1
		10555118	Pak1
		10542522	Plekha5
		10561431	Plekhg2
		10500295	Plekho1
		10400170	Prkd1
		10605465	Prkx
		10374934	Psme4
		10486061	Rasgrp1
		10597531	Rbms3
		10344952	Rdh10
		10593205	Rexo2
		10399360	Rhob
		10402117	Rps6ka5
		10552824	Rras
		10592585	Sc5d
		10583242	Sesn3
		10498064	Setd7
		10392259	Smurf2
		10461152	Snhg1
		10461158	Snhg1
		10351043	Snord47
		10400336	Snx6
		10568298	Stx1b
		10443089	Syngap1
		10583297	Taf1d
		10491038	Tbl1xr1
		10456522	Tcf4
		10464084	Tcf7l2
		10435048	Tctex1d2
		10586039	Tle3
		10457183	Tmx3
		10420596	Tnfrsf19
		10512499	Tpm2
		10362615	Traf3ip2
		10414805	Trav13d-4
		10399470	Trib2
		10358379	Trove2
		10478928	Tshz2
		10362487	Tspyl1
		10451198	Vegfa
		10586616	Vps13c
		10498284	Wwtr1
		10372383	Zdhhc17
		10453272	Zfp36l2
		10557585	Zfp553
		10591164	Zfp558
		10410341	Zfp87
"§" indicates genes with transcript clusters appearing in similar and intermediate categories.
Supporting cell primed, intermediate expression
♂		♀
Transcript cluster ID	Gene name	Transcript cluster ID	Gene name
10427049	6030408B16Rik	10584595	2610203C20Rik
10546452	Adamts9 §	10388042	6330403K07Rik
10485963	Arhgap11a	10590844	9030420J04Rik
10382998	Birc5	10439612	Boc
10400589	C79407	10360806	Capn2
10581882	Ctrb1	10536499	Cav1
10352798	Kcnh1	10536827	Ccdc136
10590494	Kif15	10423836	Cthrc1
10462632	Kif20b	10599696	Ddx26b
10538832	Mad2l1	10601044	Gdpd2
10499811	Npr1	10560945	Grik5
10530059	Sel1l3	10358660	Hmcn1 §
10456140	Sh3tc2	10358527	Hmcn1 §
		10358529	Hmcn1 §
		10358662	Hmcn1 §
		10358585	Hmcn1 §
		10358575	Hmcn1 §
		10358635	Hmcn1 §
		10358637	Hmcn1 §
		10358490	Hmcn1 §
		10358599	Hmcn1 §
		10519913	Magi2
		10415052	Mmp14
		10587107	Myo5a
		10573779	Nkd1
		10530615	Ociad2
		10522009	Pgm1
		10607658	Reps2
		10519717	Sema3a
		10547009	Vgll4
"§" indicates genes with transcript clusters appearing in similar and intermediate categories.
Supporting cell enriched & primed
♂		♀
Transcript cluster ID	Gene name	Transcript cluster ID	Gene name
10460468	Ctsf	10397148	Acot1
10352798	Kcnh1	10537014	Cpa2
10530059	Sel1l3	10405693	Dapk1
10467068	Sgms1	10389590	Gdpd1
10456140	Sh3tc2	10560945	Grik5
10396936	Smoc1	10423593	Laptm4b
		10530615	Ociad2
		10486061	Rasgrp1
		10601701	Tmem35
		10420596	Tnfrsf19
		10365658	Uhrf1bp1l
		10453272	Zfp36l2
Supporting cell enriched & primed, similar expression
♂		♀
Transcript cluster ID	Gene name	Transcript cluster ID	Gene name
10467068	Sgms1	10397148	Acot1
10396936	Smoc1	10537014	Cpa2
		10405693	Dapk1
		10389590	Gdpd1
		10423593	Laptm4b
		10486061	Rasgrp1
		10420596	Tnfrsf19
		10453272	Zfp36l2
Supporting cell enriched & primed, intermediate expression
♂		♀
Transcript cluster ID	Gene name	Transcript cluster ID	Gene name
10352798	Kcnh1	10560945	Grik5
10530059	Sel1l3	10530615	Ociad2
10456140	Sh3tc2
Supporting cell depleted & primed
♂		♀
Transcript cluster ID	Gene name	Transcript cluster ID	Gene name
10574415	1700047G07Rik	10586448	2810417H13Rik
		10371591	4930547N16Rik
		10485963	Arhgap11a
		10350392	Aspm
		10490104	Aurka
		10377405	Aurkb
		10355325	Bard1
		10382998	Birc5
		10564978	Blm
		10400589	C79407
		10594774	Ccnb2
		10515744	Cdc20
		10438378	Cdc45
		10520521	Cenpa
		10575733	Cenpn
		10450957	Cenpq
		10462866	Cep55
		10577508	Ckap2
		10474825	D2Ertd750e
		10528077	Dbf4
		10361110	Dtl
		10563780	E2f8
		10420426	F630043A04Rik
		10590494	Kif15
		10474381	Kif18a
		10454709	Kif20a
		10462632	Kif20b
		10568150	Kif22
		10521555	Lyar
		10538832	Mad2l1
		10572906	Mcm5
		10487340	Ncaph
		10352767	Nek2
		10352709	Nsl1
		10359890	Nuf2
		10491805	Plk4
		10365574	Pmch
		10607475	Prdx4
		10546834	Rad18
		10459755	Ska1
		10478572	Ube2c
Supporting cell depleted & primed, similar expression
♂		♀
Transcript cluster ID	Gene name	Transcript cluster ID	Gene name
---		10371591	4930547N16Rik
		10490104	Aurka
		10377405	Aurkb
		10355325	Bard1
		10564978	Blm
		10515744	Cdc20
		10438378	Cdc45
		10520521	Cenpa
		10575733	Cenpn
		10450957	Cenpq
		10462866	Cep55
		10577508	Ckap2
		10528077	Dbf4
		10361110	Dtl
		10563780	E2f8
		10474381	Kif18a
		10454709	Kif20a
		10568150	Kif22
		10521555	Lyar
		10572906	Mcm5
		10487340	Ncaph
		10352767	Nek2
		10352709	Nsl1
		10491805	Plk4
		10365574	Pmch
		10607475	Prdx4
		10546834	Rad18
		10478572	Ube2c
Supporting cell depleted & primed, intermediate expression
♂		♀
Transcript cluster ID	Gene name	Transcript cluster ID	Gene name
---		10485963	Arhgap11a
		10382998	Birc5
		10400589	C79407
		10590494	Kif15
		10462632	Kif20b
		10538832	Mad2l1

## Sheet: (C) Permutation tests
	Permutation test results				Number of genes in the actual list	False positive percentage
Gene lists	Average number of transcript ID's	Median number of transcript ID's	Average number of genes	Median number of genes
♂ germ cell primed	10.005	1	9.835	1	386	2.54793
♀ germ cell primed	14.055	1	13.75	1	151	9.10596
♂ germ cell enriched & primed	0	0	0	0	119	0
♀ germ cell enriched & primed	0	0	0	0	29	0
♂ germ cell depleted & primed	0	0	0	0	36	0
♀ germ cell depleted & primed	0	0	0	0	16	0
♂ supporting cell primed	6.85	2	6.795	2	41	16.5732
♀ supporting cell primed	7.545	2	7.39	2	162	4.56173
♂ supporting cell enriched & primed	0	0	0	0	6	0
♀ supporting cell enriched & primed	0	0	0	0	12	0
♂ supporting cell depleted & primed	0	0	0	0	1	0
♀ supporting cell depleted & primed	0	0	0	0	41	0

## Sheet: (D) GO terms
♂ germ cell primed, similar expression
Category	Term	Transcript cluster IDs	p-value
BP	ribonucleoprotein complex biogenesis	10534142, 10366350, 10419759, 10541845, 10454984, 10420035, 10463751, 10378508, 10451580, 10493103, 10384123, 10551173, 10581547, 10430265	5.35353e-06
BP	ncRNA metabolic process	10423629, 10366350, 10487969, 10479749, 10541845, 10454984, 10385375, 10463751, 10427772, 10384123, 10551173, 10405971, 10581547, 10454993, 10585703, 10511207, 10444605	9.97865e-06
BP	ribosome biogenesis	10493103, 10384123, 10551173, 10534142, 10581547, 10366350, 10541845, 10454984, 10420035, 10463751, 10378508, 10451580	2.10152e-05
BP	RNA processing	10423629, 10366350, 10487969, 10368762, 10479749, 10541845, 10374793, 10419759, 10454984, 10385375, 10463751, 10545917, 10384123, 10551173, 10561453, 10405971, 10581547, 10464974, 10409508, 10543551, 10511207, 10585703, 10511560, 10500091	4.03435e-05
BP	ncRNA processing	10423629, 10366350, 10479749, 10487969, 10541845, 10454984, 10385375, 10463751, 10384123, 10551173, 10405971, 10581547, 10585703, 10511207	4.11942e-05
MF	RNA binding	10461663, 10366350, 10579219, 10374793, 10528507, 10580131, 10545917, 10384123, 10551173, 10405971, 10543551, 10565811, 10585703, 10511560, 10379779, 10583788, 10357292, 10541845, 10369630, 10542872, 10463751, 10416510, 10463517, 10561453, 10582925, 10357124, 10409508, 10512165	0.000256129
BP	tRNA metabolic process	10423629, 10405971, 10487969, 10479749, 10454993, 10385375, 10585703, 10427772, 10444605	0.00345644
BP	rRNA processing	10384123, 10551173, 10581547, 10366350, 10541845, 10454984, 10463751	0.00581004
BP	rRNA metabolic process	10384123, 10551173, 10581547, 10366350, 10541845, 10454984, 10463751	0.00623212
BP	translation	10461663, 10487969, 10542872, 10427772, 10545576, 10515425, 10452468, 10454993, 10430265, 10376320, 10451472, 10565811, 10444605	0.0119379
MF	ribonuclease activity	10423629, 10551173, 10479749, 10374793, 10585703	0.0143681
BP	tRNA processing	10423629, 10405971, 10487969, 10479749, 10385375, 10585703	0.0167202
MF	purine NTP-dependent helicase activity	10384123, 10347232, 10579219, 10409508, 10369630, 10379779, 10357292	0.0173039
MF	ATP-dependent helicase activity	10384123, 10347232, 10579219, 10409508, 10369630, 10379779, 10357292	0.0173039
BP	positive regulation of hormone secretion	10533285, 10414093, 10525506	0.0181856
MF	nuclease activity	10493103, 10423629, 10551173, 10479749, 10374793, 10473976, 10414522, 10585703	0.0182225
MF	structural constituent of ribosome	10461663, 10515425, 10452468, 10376320, 10451472, 10565811, 10542872, 10545576	0.0237645
MF	ribonuclease P activity	10423629, 10479749, 10585703	0.0245022
MF	helicase activity	10384123, 10347232, 10563275, 10579219, 10409508, 10369630, 10379779, 10357292	0.029194
MF	tRNA-specific ribonuclease activity	10423629, 10479749, 10585703	0.0294614
BP	regulation of insulin secretion	10533285, 10414093, 10525506	0.04253
♀ germ cell primed, similar expression
Category	Term	Transcript cluster IDs	p-value
BP	chromatin assembly or disassembly	10377537, 10408081, 10404063, 10404069, 10387316, 10376455	0.00532085
BP	metanephros development	10604576, 10521759, 10403727, 10502240	0.00572634
BP	DNA replication	10476989, 10535979, 10578557, 10506822, 10562563, 10381072	0.00578091
BP	nucleosome assembly	10408081, 10404063, 10404069, 10376455	0.00838488
BP	nucleosome organization	10408081, 10404063, 10404069, 10376455	0.00940716
BP	chromatin assembly	10408081, 10404063, 10404069, 10376455	0.00940716
BP	protein-DNA complex assembly	10408081, 10404063, 10404069, 10376455	0.00994442
BP	neuron differentiation	10536297, 10461844, 10521759, 10403727, 10378549, 10588243, 10509163	0.0114018
BP	neuron development	10536297, 10461844, 10521759, 10403727, 10378549, 10588243	0.013945
BP	branching involved in ureteric bud morphogenesis	10604576, 10403727, 10502240	0.0148414
BP	ureteric bud morphogenesis	10604576, 10403727, 10502240	0.0148414
BP	DNA packaging	10408081, 10404063, 10404069, 10376455	0.021832
BP	neuron projection development	10536297, 10521759, 10403727, 10378549, 10588243	0.0259577
BP	kidney development	10604576, 10521759, 10403727, 10502240	0.0323566
BP	ureteric bud development	10604576, 10403727, 10502240	0.0348422
BP	axonogenesis	10521759, 10403727, 10378549, 10588243	0.046356
♂ supporting cell primed, similar expression
Category	Term	Transcript cluster IDs	p-value
---
♀ supporting cell primed, similar expression
Category	Term	Transcript cluster IDs	p-value
BP	sex differentiation	10357043, 10395520, 10464084, 10344952, 10451198	0.015597
BP	ovarian follicle development	10357043, 10395520, 10451198	0.0247969
BP	fatty acid metabolic process	10347748, 10397148, 10556491, 10592585, 10558227	0.0261347
BP	gonad development	10357043, 10395520, 10344952, 10451198	0.0276893
MF	actin binding	10585982, 10512499, 10537184, 10559207, 10384522, 10409464	0.0396052
BP	development of primary sexual characteristics	10357043, 10395520, 10344952, 10451198	0.0400794
BP	glomerulus development	10357043, 10498284	0.0404276
BP	ovulation cycle process	10357043, 10395520, 10451198	0.0422842
BP	ovulation cycle	10357043, 10395520, 10451198	0.0422842
BP	kidney development	10586781, 10357043, 10344952, 10498284	0.0457014
BP	secondary metabolic process	10357043, 10415176, 10344952	0.0472046
