# Supplementary material for: Temporal Transcriptional Profiling of Somatic and Germ Cells Reveals Biased Lineage Priming of Sexual Fate in the Fetal Mouse Gonad
Source: PLoS Genet. 2012 Mar 15;8(3):e1002575. doi: 10.1371/journal.pgen.1002575 (PMC3305395; doi:10.1371/journal.pgen.1002575)
Supplement: Dataset S5 — Sf1-EGFP primed gene lists and permutation tests. (A and B) Gene lists generated by multiple pairwise comparisons, graphically illustrated in Figure 6 and Figure S5. Genes are in alphabetical order. The gene lists are arranged by the method of selecting supporting cell primed genes, and sex. The list of all primed genes identified in the Sf1-EGFP data without limiting the list to genes associated with supporting cells, “all”, are also provided. Lists of similar and intermediate expression primed genes follow each list of primed genes (except for the first). Lists are provided starting the priming analysis at both E11.0 (A) and E10.5 (B). (C) Gene lists of interstitial/stromal associated genes that were used to remove interstitial/stromal genes from the priming analysis as illustrated in Figure 6B. (D) Lists of genes illustrated in Figure S5G that were primed at E10.5 or E11.0 and became sexually dimorphic 12 hours later. Genes are in alphabetical order. (E) Lists of genes illustrated in Figure S5H. Of the genes that were primed at E10.5 or E11.0 and remained similarly expressed in XX and XY cells 12 hours later, we identified genes that showed a significant and similar change in expression in both XX and XY cells. Genes are in alphabetical order. (F) Lists of genes illustrated in Figure S6A that were primed in the Sf1-EGFP and Sry-EGFP/Sox9-ECFP data, were primed in the Sf1-EGFP data and dimorphic in the Sry-EGFP/Sox9-ECFP data, and a subset of these E11.5 dimorphic genes that showed indications of previous priming in the Sry-EGFP/Sox9-ECFP cells. Genes are in alphabetical order. (XLSX) [file pgen.1002575.s005.xlsx]

## Sheet: (A) Gene lists
E11.0 Sf1 primed (all)
♂		♀
ID	Gene name	ID	Gene name
1416225_at	Adh1	1429074_at	1700026D08Rik
1416551_at	Atp2a2	1432031_at	4930563E18Rik
1424511_at	Aurka	1428502_at	Actr6
1455401_at	Camkk2	1416319_at	Adk
1423286_at	Cbln1	1416077_at	Adm
1423287_at	Cbln1	1447839_x_at	Adm
1423288_s_at	Cbln1	1451461_a_at	Aldoc
1433607_at	Cbln4	1454745_at	Arhgap29
1417911_at	Ccna2	1433966_x_at	Asns
1416034_at	Cd24a	1451095_at	Asns
1448182_a_at	Cd24a	1433617_s_at	B4galt5
1433720_s_at	Chchd10	1424890_at	Bnc1
1436990_s_at	Chchd10	1433988_s_at	C230098O21Rik
1450981_at	Cnn2	1436030_at	Cachd1
1450567_a_at	Col2a1	1449145_a_at	Cav1
1428571_at	Col9a1	1455991_at	Ccbl2
1458345_s_at	Colec11	1424186_at	Ccdc80
1437351_at	Cxxc4	1436789_at	Ccnjl
1417937_at	Dact1	1419249_at	Cdk14
1420360_at	Dkk1	1424638_at	Cdkn1a
1435054_at	Eme1	1417649_at	Cdkn1c
1421929_at	Epha4	1435017_at	Cisd3
1416022_at	Fabp5	1437146_x_at	Coro7
1438007_at	Fam19a2	1426243_at	Cth
1418195_at	Galnt10	1433743_at	Dach1
1452803_at	Glipr2	1427358_a_at	Dapk1
1449106_at	Gpx3	1424270_at	Dclk1
1425815_a_at	Hmmr	1424271_at	Dclk1
1431099_at	Hoxd8	1436659_at	Dclk1
1436037_at	Itga4	1451289_at	Dclk1
1418656_at	Lsm5	1426465_at	Dlgap4
1422460_at	Mad2l1	1455548_at	Dlgap4
1450397_at	Mtap1b	1436405_at	Dock4
1419254_at	Mthfd2	1444028_s_at	Dock9
1416222_at	Nsdhl	1450932_s_at	Dock9
1417923_at	Pak3	1440452_at	Drp2
1435486_at	Pak3	1426911_at	Dsc2
1437318_at	Pak3	1433845_x_at	Dusp9
1460411_s_at	Pkdcc	1454737_at	Dusp9
1437695_at	Prokr2	1440000_at	E330013P04Rik
1451358_a_at	Racgap1	1456258_at	Emx2
1426965_at	Rap2a	1448136_at	Enpp2
1427231_at	Robo1	1434575_at	Epb4.1l1
1434909_at	Rragd	1460592_at	Epb4.1l1
1415824_at	Scd2	1437119_at	Ern1
1439500_at	Scrn1	1424595_at	F11r
1452227_at	Sel1l3	1417147_at	Fam69b
1429233_at	Sept11	1452826_s_at	Fbxl20
1429234_s_at	Sept11	1435221_at	Foxp1
1439510_at	Sgol1	1451264_at	Frmd6
1424950_at	Sox9	1421365_at	Fst
1451538_at	Sox9	1434458_at	Fst
1449201_at	Star	1433707_at	Gabra4
1434089_at	Synpo	1425463_at	Gata6
1417447_at	Tcf21	1425464_at	Gata6
1448529_at	Thbd	1435906_x_at	Gbp2
1423049_a_at	Tpm1	1436210_at	Gk5
1452954_at	Ube2c	1454713_s_at	Hdc
1456389_at	Zeb2	1424254_at	Ifitm1
		1449026_at	Ifnar1
		1434413_at	Igf1
		1437401_at	Igf1
		1436293_x_at	Ildr2
		1433542_at	Inpp5f
		1422835_at	Kcnd2
		1426810_at	Kdm3a
		1426530_a_at	Klhl5
		1452889_at	Lhpp
		1435774_at	LOC106740
		1428523_at	Lphn3
		1460440_at	Lphn3
		1454969_at	Lypd6
		1417110_at	Man1a
		1448601_s_at	Msx1
		1451352_s_at	Mta3
		1452670_at	Myl9
		1424988_at	Mylip
		1448465_at	Nipsnap1
		1456748_a_at	Nipsnap1
		1419112_at	Nlk
		1425784_a_at	Olfm1
		1438672_at	Parvb
		1447640_s_at	Pbx3
		1458218_s_at	Pde7a
		1456482_at	Pik3r3
		1429183_at	Pkp2
		1449799_s_at	Pkp2
		1437113_s_at	Pld1
		1417288_at	Plekha2
		1451753_at	Plxna2
		1453286_at	Plxna2
		1455037_at	Plxna2
		1433431_at	Pnlip
		1415777_at	Pnliprp1
		1448688_at	Podxl
		1416270_at	Polr2g
		1440285_at	Ppp1r9a
		1422847_a_at	Prkcd
		1434948_at	Rab11fip2
		1455169_at	Rab11fip2
		1457140_s_at	Rassf10
		1425114_at	Rbbp6
		1423103_at	Rfx5
		1418318_at	Rnf128
		1449036_at	Rnf128
		1455500_at	Rnf213
		1427299_at	Rps6ka3
		1449319_at	Rspo1
		1450699_at	Selenbp1
		1429348_at	Sema3c
		1435437_at	Setd7
		1424308_at	Slc24a3
		1428089_at	Slitrk1
		1417697_at	Soat1
		1426258_at	Sorl1
		1453003_at	Sorl1
		1425011_x_at	Stx18
		1438200_at	Sulf1
		1440150_at	Tgm3
		1416345_at	Timm8a1
		1424445_at	Tm4sf5
		1435259_s_at	Tmem141
		1429175_at	Tmem178
		1417174_at	Tmem218
		1448147_at	Tnfrsf19
		1436600_at	Tox3
		1416926_at	Trp53inp1
		1427232_at	Tshz1
		1441687_at	Wnt4
		1450782_at	Wnt4
		1433953_at	Zfp277
		1437921_x_at	Zfp516
		1436026_at	Zfp703
E11.0 Sf1 primed, E12.5 supporting cell enriched
♂		♀
ID	Gene name	ID	Gene name
1416551_at	Atp2a2	1428502_at	Actr6
1455401_at	Camkk2	1416319_at	Adk
1433607_at	Cbln4	1416077_at	Adm
1433720_s_at	Chchd10	1447839_x_at	Adm
1436990_s_at	Chchd10	1451461_a_at	Aldoc
1416222_at	Nsdhl	1433617_s_at	B4galt5
1417923_at	Pak3	1455991_at	Ccbl2
1435486_at	Pak3	1419249_at	Cdk14
1437318_at	Pak3	1427358_a_at	Dapk1
1427231_at	Robo1	1424270_at	Dclk1
1434909_at	Rragd	1424271_at	Dclk1
1415824_at	Scd2	1436659_at	Dclk1
1439500_at	Scrn1	1451289_at	Dclk1
1452227_at	Sel1l3	1436405_at	Dock4
1424950_at	Sox9	1440452_at	Drp2
1451538_at	Sox9	1426911_at	Dsc2
		1434575_at	Epb4.1l1
		1460592_at	Epb4.1l1
		1451264_at	Frmd6
		1421365_at	Fst
		1434458_at	Fst
		1436210_at	Gk5
		1449026_at	Ifnar1
		1426810_at	Kdm3a
		1452889_at	Lhpp
		1419112_at	Nlk
		1456482_at	Pik3r3
		1437113_s_at	Pld1
		1448688_at	Podxl
		1416270_at	Polr2g
		1422847_a_at	Prkcd
		1427299_at	Rps6ka3
		1449319_at	Rspo1
		1428089_at	Slitrk1
		1440150_at	Tgm3
		1429175_at	Tmem178
		1448147_at	Tnfrsf19
		1441687_at	Wnt4
		1450782_at	Wnt4
		1433953_at	Zfp277
E11.0 Sf1 primed, E12.5 supporting cell enriched, similar expression
♂		♀
ID	Gene name	ID	Gene name
1416551_at	Atp2a2	1416319_at	Adk
1455401_at	Camkk2	1455991_at	Ccbl2
1433720_s_at	Chchd10 §	1419249_at	Cdk14
1416222_at	Nsdhl	1427358_a_at	Dapk1
1427231_at	Robo1	1424270_at	Dclk1
1434909_at	Rragd	1424271_at	Dclk1
1415824_at	Scd2	1436659_at	Dclk1
1439500_at	Scrn1	1451289_at	Dclk1
		1426911_at	Dsc2
		1434575_at	Epb4.1l1
		1436210_at	Gk5
		1426810_at	Kdm3a
		1456482_at	Pik3r3
		1416270_at	Polr2g
		1422847_a_at	Prkcd
		1429175_at	Tmem178
		1441687_at	Wnt4 §
		1433953_at	Zfp277
"§" indicates genes with transcript clusters appearing in similar and intermediate categories.
E11.0 Sf1 primed, E12.5 supporting cell enriched, intermediate expression
♂		♀
ID	Gene name	ID	Gene name
1433607_at	Cbln4	1416077_at	Adm
1436990_s_at	Chchd10 §	1447839_x_at	Adm
1417923_at	Pak3	1451461_a_at	Aldoc
1435486_at	Pak3	1436405_at	Dock4
1437318_at	Pak3	1440452_at	Drp2
1452227_at	Sel1l3	1451264_at	Frmd6
1424950_at	Sox9	1421365_at	Fst
1451538_at	Sox9	1434458_at	Fst
		1449026_at	Ifnar1
		1452889_at	Lhpp
		1437113_s_at	Pld1
		1448688_at	Podxl
		1427299_at	Rps6ka3
		1449319_at	Rspo1
		1428089_at	Slitrk1
		1448147_at	Tnfrsf19
		1450782_at	Wnt4 §
"§" indicates genes with transcript clusters appearing in similar and intermediate categories.
E11.0 Sf1 primed, removing E12.5 interstitial/stromal genes
♂		♀
ID	Gene name	ID	Gene name
1416225_at	Adh1	1429074_at	1700026D08Rik
1416551_at	Atp2a2	1432031_at	4930563E18Rik
1424511_at	Aurka	1428502_at	Actr6
1455401_at	Camkk2	1416319_at	Adk
1433607_at	Cbln4	1416077_at	Adm
1417911_at	Ccna2	1447839_x_at	Adm
1416034_at	Cd24a	1451461_a_at	Aldoc
1448182_a_at	Cd24a	1454745_at	Arhgap29
1433720_s_at	Chchd10	1433966_x_at	Asns
1436990_s_at	Chchd10	1451095_at	Asns
1450981_at	Cnn2	1433617_s_at	B4galt5
1450567_a_at	Col2a1	1424890_at	Bnc1
1428571_at	Col9a1	1433988_s_at	C230098O21Rik
1458345_s_at	Colec11	1436030_at	Cachd1
1437351_at	Cxxc4	1449145_a_at	Cav1
1420360_at	Dkk1	1455991_at	Ccbl2
1435054_at	Eme1	1424186_at	Ccdc80
1421929_at	Epha4	1419249_at	Cdk14
1416022_at	Fabp5	1424638_at	Cdkn1a
1438007_at	Fam19a2	1417649_at	Cdkn1c
1418195_at	Galnt10	1435017_at	Cisd3
1425815_a_at	Hmmr	1437146_x_at	Coro7
1431099_at	Hoxd8	1426243_at	Cth
1418656_at	Lsm5	1433743_at	Dach1
1422460_at	Mad2l1	1427358_a_at	Dapk1
1450397_at	Mtap1b	1424270_at	Dclk1
1419254_at	Mthfd2	1424271_at	Dclk1
1416222_at	Nsdhl	1436659_at	Dclk1
1417923_at	Pak3	1451289_at	Dclk1
1435486_at	Pak3	1426465_at	Dlgap4
1437318_at	Pak3	1455548_at	Dlgap4
1460411_s_at	Pkdcc	1436405_at	Dock4
1451358_a_at	Racgap1	1444028_s_at	Dock9
1426965_at	Rap2a	1450932_s_at	Dock9
1427231_at	Robo1	1440452_at	Drp2
1434909_at	Rragd	1426911_at	Dsc2
1415824_at	Scd2	1433845_x_at	Dusp9
1439500_at	Scrn1	1454737_at	Dusp9
1452227_at	Sel1l3	1440000_at	E330013P04Rik
1429233_at	Sept11	1456258_at	Emx2
1429234_s_at	Sept11	1434575_at	Epb4.1l1
1439510_at	Sgol1	1460592_at	Epb4.1l1
1424950_at	Sox9	1437119_at	Ern1
1451538_at	Sox9	1424595_at	F11r
1434089_at	Synpo	1417147_at	Fam69b
1423049_a_at	Tpm1	1452826_s_at	Fbxl20
1452954_at	Ube2c	1435221_at	Foxp1
		1451264_at	Frmd6
		1421365_at	Fst
		1434458_at	Fst
		1433707_at	Gabra4
		1425463_at	Gata6
		1425464_at	Gata6
		1435906_x_at	Gbp2
		1436210_at	Gk5
		1454713_s_at	Hdc
		1424254_at	Ifitm1
		1449026_at	Ifnar1
		1434413_at	Igf1
		1437401_at	Igf1
		1436293_x_at	Ildr2
		1433542_at	Inpp5f
		1422835_at	Kcnd2
		1426810_at	Kdm3a
		1426530_a_at	Klhl5
		1452889_at	Lhpp
		1435774_at	LOC106740
		1428523_at	Lphn3
		1460440_at	Lphn3
		1454969_at	Lypd6
		1417110_at	Man1a
		1448601_s_at	Msx1
		1451352_s_at	Mta3
		1452670_at	Myl9
		1424988_at	Mylip
		1448465_at	Nipsnap1
		1456748_a_at	Nipsnap1
		1419112_at	Nlk
		1425784_a_at	Olfm1
		1438672_at	Parvb
		1447640_s_at	Pbx3
		1458218_s_at	Pde7a
		1456482_at	Pik3r3
		1437113_s_at	Pld1
		1451753_at	Plxna2
		1453286_at	Plxna2
		1455037_at	Plxna2
		1433431_at	Pnlip
		1415777_at	Pnliprp1
		1448688_at	Podxl
		1416270_at	Polr2g
		1440285_at	Ppp1r9a
		1422847_a_at	Prkcd
		1434948_at	Rab11fip2
		1455169_at	Rab11fip2
		1457140_s_at	Rassf10
		1425114_at	Rbbp6
		1423103_at	Rfx5
		1418318_at	Rnf128
		1449036_at	Rnf128
		1427299_at	Rps6ka3
		1449319_at	Rspo1
		1450699_at	Selenbp1
		1429348_at	Sema3c
		1435437_at	Setd7
		1428089_at	Slitrk1
		1417697_at	Soat1
		1426258_at	Sorl1
		1453003_at	Sorl1
		1425011_x_at	Stx18
		1438200_at	Sulf1
		1440150_at	Tgm3
		1416345_at	Timm8a1
		1424445_at	Tm4sf5
		1435259_s_at	Tmem141
		1429175_at	Tmem178
		1417174_at	Tmem218
		1448147_at	Tnfrsf19
		1436600_at	Tox3
		1416926_at	Trp53inp1
		1427232_at	Tshz1
		1441687_at	Wnt4
		1450782_at	Wnt4
		1433953_at	Zfp277
		1437921_x_at	Zfp516
		1436026_at	Zfp703
E11.0 Sf1 primed, removing E12.5 interstitial/stromal genes, similar expression
♂		♀
ID	Gene name	ID	Gene name
1416225_at	Adh1	1416319_at	Adk
1416551_at	Atp2a2	1454745_at	Arhgap29
1424511_at	Aurka	1433966_x_at	Asns
1455401_at	Camkk2	1451095_at	Asns
1417911_at	Ccna2	1424890_at	Bnc1
1416034_at	Cd24a	1449145_a_at	Cav1
1448182_a_at	Cd24a	1455991_at	Ccbl2
1433720_s_at	Chchd10 §	1419249_at	Cdk14
1450981_at	Cnn2	1417649_at	Cdkn1c
1428571_at	Col9a1	1435017_at	Cisd3
1437351_at	Cxxc4	1437146_x_at	Coro7
1421929_at	Epha4	1426243_at	Cth
1416022_at	Fabp5	1433743_at	Dach1
1418195_at	Galnt10	1427358_a_at	Dapk1
1425815_a_at	Hmmr	1424270_at	Dclk1
1431099_at	Hoxd8	1424271_at	Dclk1
1418656_at	Lsm5	1436659_at	Dclk1
1422460_at	Mad2l1	1451289_at	Dclk1
1450397_at	Mtap1b	1426465_at	Dlgap4
1419254_at	Mthfd2	1455548_at	Dlgap4
1416222_at	Nsdhl	1444028_s_at	Dock9
1460411_s_at	Pkdcc	1450932_s_at	Dock9
1451358_a_at	Racgap1	1426911_at	Dsc2
1426965_at	Rap2a	1433845_x_at	Dusp9
1427231_at	Robo1	1454737_at	Dusp9
1434909_at	Rragd	1440000_at	E330013P04Rik
1415824_at	Scd2	1434575_at	Epb4.1l1
1439500_at	Scrn1	1437119_at	Ern1
1429233_at	Sept11	1424595_at	F11r
1429234_s_at	Sept11	1417147_at	Fam69b
1434089_at	Synpo	1452826_s_at	Fbxl20
1423049_a_at	Tpm1	1435221_at	Foxp1
1452954_at	Ube2c	1425463_at	Gata6
		1425464_at	Gata6
		1436210_at	Gk5
		1454713_s_at	Hdc
		1434413_at	Igf1
		1437401_at	Igf1
		1436293_x_at	Ildr2
		1426810_at	Kdm3a
		1435774_at	LOC106740
		1428523_at	Lphn3
		1460440_at	Lphn3
		1417110_at	Man1a
		1448601_s_at	Msx1
		1451352_s_at	Mta3
		1424988_at	Mylip
		1448465_at	Nipsnap1
		1438672_at	Parvb
		1458218_s_at	Pde7a
		1456482_at	Pik3r3
		1451753_at	Plxna2
		1453286_at	Plxna2
		1455037_at	Plxna2
		1433431_at	Pnlip
		1416270_at	Polr2g
		1440285_at	Ppp1r9a
		1422847_a_at	Prkcd
		1434948_at	Rab11fip2
		1457140_s_at	Rassf10
		1425114_at	Rbbp6
		1423103_at	Rfx5
		1450699_at	Selenbp1
		1435437_at	Setd7
		1417697_at	Soat1
		1426258_at	Sorl1
		1453003_at	Sorl1
		1425011_x_at	Stx18
		1416345_at	Timm8a1
		1424445_at	Tm4sf5
		1429175_at	Tmem178
		1417174_at	Tmem218
		1436600_at	Tox3
		1416926_at	Trp53inp1
		1427232_at	Tshz1
		1441687_at	Wnt4 §
		1433953_at	Zfp277
		1437921_x_at	Zfp516
		1436026_at	Zfp703
"§" indicates genes with transcript clusters appearing in similar and intermediate categories.
E11.0 Sf1 primed, removing E12.5 interstitial/stromal genes, intermediate expression
♂		♀
ID	Gene name	ID	Gene name
1433607_at	Cbln4	1429074_at	1700026D08Rik
1436990_s_at	Chchd10 §	1432031_at	4930563E18Rik
1450567_a_at	Col2a1	1416077_at	Adm
1417923_at	Pak3	1447839_x_at	Adm
1435486_at	Pak3	1451461_a_at	Aldoc
1437318_at	Pak3	1433988_s_at	C230098O21Rik
1452227_at	Sel1l3	1424638_at	Cdkn1a
1424950_at	Sox9	1436405_at	Dock4
1451538_at	Sox9	1440452_at	Drp2
		1456258_at	Emx2
		1451264_at	Frmd6
		1421365_at	Fst
		1434458_at	Fst
		1433707_at	Gabra4
		1435906_x_at	Gbp2
		1424254_at	Ifitm1
		1449026_at	Ifnar1
		1433542_at	Inpp5f
		1422835_at	Kcnd2
		1426530_a_at	Klhl5
		1452889_at	Lhpp
		1454969_at	Lypd6
		1452670_at	Myl9
		1437113_s_at	Pld1
		1415777_at	Pnliprp1
		1448688_at	Podxl
		1418318_at	Rnf128
		1449036_at	Rnf128
		1427299_at	Rps6ka3
		1449319_at	Rspo1
		1428089_at	Slitrk1
		1448147_at	Tnfrsf19
		1450782_at	Wnt4 §
"§" indicates genes with transcript clusters appearing in similar and intermediate categories.

## Sheet: (B) Gene lists
E10.5 Sf1 primed (all)
♂		♀
ID	Gene name	ID	Gene name
1434240_at	4632434I11Rik	1429074_at	1700026D08Rik
1421172_at	Adam12	1416319_at	Adk
1416225_at	Adh1	1438292_x_at	Adk
1423714_at	Asf1b	1416077_at	Adm
1424511_at	Aurka	1447839_x_at	Adm
1424128_x_at	Aurkb	1451461_a_at	Aldoc
1451246_s_at	Aurkb	1433617_s_at	B4galt5
1434767_at	C79407	1424890_at	Bnc1
1430193_at	Casc5	1436030_at	Cachd1
1423286_at	Cbln1	1455991_at	Ccbl2
1423287_at	Cbln1	1436789_at	Ccnjl
1423288_s_at	Cbln1	1419249_at	Cdk14
1417911_at	Ccna2	1417649_at	Cdkn1c
1416034_at	Cd24a	1435017_at	Cisd3
1448182_a_at	Cd24a	1426243_at	Cth
1456077_x_at	Cdc25c	1442434_at	D8Ertd82e
1417019_a_at	Cdc6	1455717_s_at	Daam2
1448466_at	Cdca5	1433743_at	Dach1
1435005_at	Cenpe	1426915_at	Dapk1
1439040_at	Cenpe	1427358_a_at	Dapk1
1433720_s_at	Chchd10	1426911_at	Dsc2
1436990_s_at	Chchd10	1455613_at	E130308A19Rik
1450981_at	Cnn2	1440000_at	E330013P04Rik
1428571_at	Col9a1	1424595_at	F11r
1458345_s_at	Colec11	1435221_at	Foxp1
1437351_at	Cxxc4	1421365_at	Fst
1431469_a_at	Cxxc5	1434458_at	Fst
1422484_at	Cycs	1425463_at	Gata6
1417937_at	Dact1	1425464_at	Gata6
1420360_at	Dkk1	1435906_x_at	Gbp2
1455730_at	Dlgap5	1417434_at	Gpd2
1435493_at	Dsp	1454996_at	Hsdl1
1435494_s_at	Dsp	1436293_x_at	Ildr2
1428834_at	Dusp4	1433542_at	Inpp5f
1417403_at	Elovl6	1447757_x_at	Inpp5f
1417404_at	Elovl6	1418517_at	Irx3
1416022_at	Fabp5	1448169_at	Krt18
1452924_at	Fam83d	1454969_at	Lypd6
1418195_at	Galnt10	1417110_at	Man1a
1452803_at	Glipr2	1448601_s_at	Msx1
1449106_at	Gpx3	1424988_at	Mylip
1425815_a_at	Hmmr	1448465_at	Nipsnap1
1427541_x_at	Hmmr	1456748_a_at	Nipsnap1
1450156_a_at	Hmmr	1419112_at	Nlk
1431099_at	Hoxd8	1425784_a_at	Olfm1
1433638_s_at	Hoxd8	1455796_x_at	Olfm1
1416761_at	Hsd11b2	1438672_at	Parvb
1448453_at	Hsd3b1	1439484_at	Pde7a
1434051_s_at	Hspa12a	1458218_s_at	Pde7a
1436037_at	Itga4	1456482_at	Pik3r3
1435306_a_at	Kif11	1417288_at	Plekha2
1453226_at	Kif18b	1433431_at	Pnlip
1455990_at	Kif23	1448688_at	Podxl
1423520_at	Lmnb1	1416270_at	Polr2g
1431004_at	Loxl2	1440285_at	Ppp1r9a
1418656_at	Lsm5	1434948_at	Rab11fip2
1422460_at	Mad2l1	1455169_at	Rab11fip2
1416558_at	Melk	1457140_s_at	Rassf10
1427100_at	Metrn	1455500_at	Rnf213
1416222_at	Nsdhl	1427299_at	Rps6ka3
1430811_a_at	Nuf2	1449319_at	Rspo1
1416309_at	Nusap1	1449202_at	Sema4g
1437318_at	Pak3	1435437_at	Setd7
1428788_at	Pgp	1424308_at	Slc24a3
1460411_s_at	Pkdcc	1426258_at	Sorl1
1452458_s_at	Ppil5	1429175_at	Tmem178
1423774_a_at	Prc1	1417174_at	Tmem218
1423775_s_at	Prc1	1441687_at	Wnt4
1434195_at	Prss35	1436365_at	Zbtb7c
1417323_at	Psrc1	1433953_at	Zfp277
1421546_a_at	Racgap1	1437921_x_at	Zfp516
1451358_a_at	Racgap1	1436026_at	Zfp703
1423749_s_at	Rangap1
1451092_a_at	Rangap1
1427231_at	Robo1
1416998_at	Rrs1
1439500_at	Scrn1
1418919_at	Sgol1
1439510_at	Sgol1
1450496_a_at	Ska1
1424950_at	Sox9
1451538_at	Sox9
1434089_at	Synpo
1435554_at	Tmcc3
1418412_at	Tpd52l1
1428104_at	Tpx2
1452954_at	Ube2c
1447845_s_at	Vnn1
E10.5 Sf1 primed, E12.5 supporting cell enriched
♂		♀
ID	Gene name	ID	Gene name
1433720_s_at	Chchd10	1416319_at	Adk
1436990_s_at	Chchd10	1438292_x_at	Adk
1435493_at	Dsp	1416077_at	Adm
1435494_s_at	Dsp	1447839_x_at	Adm
1416222_at	Nsdhl	1451461_a_at	Aldoc
1437318_at	Pak3	1433617_s_at	B4galt5
1427231_at	Robo1	1455991_at	Ccbl2
1439500_at	Scrn1	1419249_at	Cdk14
1424950_at	Sox9	1455717_s_at	Daam2
1451538_at	Sox9	1426915_at	Dapk1
1418412_at	Tpd52l1	1427358_a_at	Dapk1
1447845_s_at	Vnn1	1426911_at	Dsc2
		1421365_at	Fst
		1434458_at	Fst
		1417434_at	Gpd2
		1419112_at	Nlk
		1456482_at	Pik3r3
		1448688_at	Podxl
		1416270_at	Polr2g
		1427299_at	Rps6ka3
		1449319_at	Rspo1
		1449202_at	Sema4g
		1429175_at	Tmem178
		1441687_at	Wnt4
		1433953_at	Zfp277
E10.5 Sf1 primed, E12.5 supporting cell enriched, similar expression
♂		♀
ID	Gene name	ID	Gene name
1433720_s_at	Chchd10	1416319_at	Adk
1435493_at	Dsp	1438292_x_at	Adk
1416222_at	Nsdhl	1455991_at	Ccbl2
1427231_at	Robo1	1419249_at	Cdk14
1439500_at	Scrn1	1455717_s_at	Daam2
		1426915_at	Dapk1
		1427358_a_at	Dapk1
		1426911_at	Dsc2
		1417434_at	Gpd2
		1419112_at	Nlk
		1456482_at	Pik3r3
		1416270_at	Polr2g
		1449202_at	Sema4g
		1429175_at	Tmem178
E10.5 Sf1 primed, E12.5 supporting cell enriched, intermediate expression
♂		♀
ID	Gene name	ID	Gene name
1437318_at	Pak3	1416077_at	Adm
1424950_at	Sox9	1447839_x_at	Adm
1451538_at	Sox9	1451461_a_at	Aldoc
1418412_at	Tpd52l1	1421365_at	Fst
1447845_s_at	Vnn1	1434458_at	Fst
		1448688_at	Podxl
		1427299_at	Rps6ka3
		1449319_at	Rspo1
		1433953_at	Zfp277
E10.5 Sf1 primed, removing E12.5 interstitial/stromal genes
♂		♀
ID	Gene name	ID	Gene name
1434240_at	4632434I11Rik	1429074_at	1700026D08Rik
1421172_at	Adam12	1416319_at	Adk
1416225_at	Adh1	1438292_x_at	Adk
1423714_at	Asf1b	1416077_at	Adm
1424511_at	Aurka	1447839_x_at	Adm
1424128_x_at	Aurkb	1451461_a_at	Aldoc
1451246_s_at	Aurkb	1433617_s_at	B4galt5
1434767_at	C79407	1424890_at	Bnc1
1430193_at	Casc5	1436030_at	Cachd1
1417911_at	Ccna2	1455991_at	Ccbl2
1416034_at	Cd24a	1419249_at	Cdk14
1448182_a_at	Cd24a	1417649_at	Cdkn1c
1456077_x_at	Cdc25c	1435017_at	Cisd3
1417019_a_at	Cdc6	1426243_at	Cth
1448466_at	Cdca5	1442434_at	D8Ertd82e
1433720_s_at	Chchd10	1455717_s_at	Daam2
1436990_s_at	Chchd10	1433743_at	Dach1
1450981_at	Cnn2	1426915_at	Dapk1
1428571_at	Col9a1	1427358_a_at	Dapk1
1458345_s_at	Colec11	1426911_at	Dsc2
1437351_at	Cxxc4	1455613_at	E130308A19Rik
1431469_a_at	Cxxc5	1440000_at	E330013P04Rik
1422484_at	Cycs	1424595_at	F11r
1420360_at	Dkk1	1435221_at	Foxp1
1455730_at	Dlgap5	1421365_at	Fst
1435493_at	Dsp	1434458_at	Fst
1435494_s_at	Dsp	1425463_at	Gata6
1428834_at	Dusp4	1425464_at	Gata6
1417403_at	Elovl6	1435906_x_at	Gbp2
1417404_at	Elovl6	1417434_at	Gpd2
1416022_at	Fabp5	1454996_at	Hsdl1
1452924_at	Fam83d	1436293_x_at	Ildr2
1418195_at	Galnt10	1433542_at	Inpp5f
1425815_a_at	Hmmr	1447757_x_at	Inpp5f
1427541_x_at	Hmmr	1418517_at	Irx3
1450156_a_at	Hmmr	1448169_at	Krt18
1431099_at	Hoxd8	1454969_at	Lypd6
1433638_s_at	Hoxd8	1417110_at	Man1a
1434051_s_at	Hspa12a	1448601_s_at	Msx1
1435306_a_at	Kif11	1424988_at	Mylip
1453226_at	Kif18b	1448465_at	Nipsnap1
1455990_at	Kif23	1456748_a_at	Nipsnap1
1423520_at	Lmnb1	1419112_at	Nlk
1418656_at	Lsm5	1425784_a_at	Olfm1
1422460_at	Mad2l1	1455796_x_at	Olfm1
1416558_at	Melk	1438672_at	Parvb
1427100_at	Metrn	1439484_at	Pde7a
1416222_at	Nsdhl	1458218_s_at	Pde7a
1416309_at	Nusap1	1456482_at	Pik3r3
1437318_at	Pak3	1433431_at	Pnlip
1428788_at	Pgp	1448688_at	Podxl
1460411_s_at	Pkdcc	1416270_at	Polr2g
1452458_s_at	Ppil5	1440285_at	Ppp1r9a
1423774_a_at	Prc1	1434948_at	Rab11fip2
1423775_s_at	Prc1	1455169_at	Rab11fip2
1434195_at	Prss35	1457140_s_at	Rassf10
1417323_at	Psrc1	1427299_at	Rps6ka3
1421546_a_at	Racgap1	1449319_at	Rspo1
1451358_a_at	Racgap1	1449202_at	Sema4g
1423749_s_at	Rangap1	1435437_at	Setd7
1451092_a_at	Rangap1	1426258_at	Sorl1
1427231_at	Robo1	1429175_at	Tmem178
1416998_at	Rrs1	1417174_at	Tmem218
1439500_at	Scrn1	1441687_at	Wnt4
1418919_at	Sgol1	1436365_at	Zbtb7c
1439510_at	Sgol1	1433953_at	Zfp277
1450496_a_at	Ska1	1437921_x_at	Zfp516
1424950_at	Sox9	1436026_at	Zfp703
1451538_at	Sox9
1434089_at	Synpo
1435554_at	Tmcc3
1418412_at	Tpd52l1
1428104_at	Tpx2
1452954_at	Ube2c
1447845_s_at	Vnn1
E10.5 Sf1 primed, removing E12.5 interstitial/stromal genes, similar expression
♂		♀
ID	Gene name	ID	Gene name
1434240_at	4632434I11Rik	1416319_at	Adk
1421172_at	Adam12	1438292_x_at	Adk
1416225_at	Adh1	1436030_at	Cachd1
1423714_at	Asf1b	1455991_at	Ccbl2
1451246_s_at	Aurkb	1419249_at	Cdk14
1434767_at	C79407	1435017_at	Cisd3
1417911_at	Ccna2	1426243_at	Cth
1416034_at	Cd24a	1442434_at	D8Ertd82e
1448182_a_at	Cd24a	1455717_s_at	Daam2
1417019_a_at	Cdc6	1433743_at	Dach1
1448466_at	Cdca5	1426915_at	Dapk1
1433720_s_at	Chchd10	1427358_a_at	Dapk1
1450981_at	Cnn2	1426911_at	Dsc2
1428571_at	Col9a1	1455613_at	E130308A19Rik
1437351_at	Cxxc4	1440000_at	E330013P04Rik
1422484_at	Cycs	1424595_at	F11r
1435493_at	Dsp	1425463_at	Gata6
1417403_at	Elovl6	1425464_at	Gata6
1417404_at	Elovl6	1417434_at	Gpd2
1452924_at	Fam83d	1454996_at	Hsdl1
1427541_x_at	Hmmr	1436293_x_at	Ildr2
1450156_a_at	Hmmr	1433542_at	Inpp5f §
1431099_at	Hoxd8	1448169_at	Krt18
1433638_s_at	Hoxd8	1417110_at	Man1a
1435306_a_at	Kif11	1424988_at	Mylip
1453226_at	Kif18b	1448465_at	Nipsnap1
1418656_at	Lsm5	1456748_a_at	Nipsnap1
1422460_at	Mad2l1	1419112_at	Nlk
1416558_at	Melk	1425784_a_at	Olfm1
1427100_at	Metrn	1438672_at	Parvb
1416222_at	Nsdhl	1439484_at	Pde7a
1416309_at	Nusap1	1458218_s_at	Pde7a
1428788_at	Pgp	1456482_at	Pik3r3
1460411_s_at	Pkdcc	1416270_at	Polr2g
1452458_s_at	Ppil5	1440285_at	Ppp1r9a
1423774_a_at	Prc1	1434948_at	Rab11fip2
1423775_s_at	Prc1	1457140_s_at	Rassf10
1417323_at	Psrc1	1449202_at	Sema4g
1451358_a_at	Racgap1	1435437_at	Setd7
1423749_s_at	Rangap1	1426258_at	Sorl1
1451092_a_at	Rangap1	1429175_at	Tmem178
1427231_at	Robo1	1417174_at	Tmem218
1416998_at	Rrs1	1436365_at	Zbtb7c
1439500_at	Scrn1
1439510_at	Sgol1
1450496_a_at	Ska1
1434089_at	Synpo
1435554_at	Tmcc3
1428104_at	Tpx2
1452954_at	Ube2c
"§" indicates genes with transcript clusters appearing in similar and intermediate categories.
E10.5 Sf1 primed, removing E12.5 interstitial/stromal genes, intermediate expression
♂		♀
ID	Gene name	ID	Gene name
1458345_s_at	Colec11	1429074_at	1700026D08Rik
1428834_at	Dusp4	1416077_at	Adm
1434051_s_at	Hspa12a	1447839_x_at	Adm
1437318_at	Pak3	1451461_a_at	Aldoc
1434195_at	Prss35	1421365_at	Fst
1424950_at	Sox9	1434458_at	Fst
1451538_at	Sox9	1435906_x_at	Gbp2
1418412_at	Tpd52l1	1447757_x_at	Inpp5f §
1447845_s_at	Vnn1	1418517_at	Irx3
		1454969_at	Lypd6
		1448601_s_at	Msx1
		1433431_at	Pnlip
		1448688_at	Podxl
		1427299_at	Rps6ka3
		1449319_at	Rspo1
		1433953_at	Zfp277
"§" indicates genes with transcript clusters appearing in similar and intermediate categories.

## Sheet: (C) Gene lists
Interstitial/stromal genes to remove
♂		♀
ID	Gene name	ID	Gene name
10419416	3632451O06Rik	10599951	1110012L19Rik
10355176	4921521F21Rik	10599581	2610018G03Rik
10575775	4933407C03Rik	10542880	4833442J19Rik
10536635	A430107O13Rik	10585834	6030419C18Rik
10565712	Acer3	10455942	A730017C20Rik
10375751	Adamts2	10396640	Akap5
10440534	Adamts5	10368356	Akap7
10505132	Akap2	10533345	Aldh2
10505143	Akap2	10372145	Alx1
10473444	Aplnr	10427222	Amhr2
10606735	Armcx2	10351056	Ankrd45
10350392	Aspm	10361091	Atf3
10405047	Aspn	10359689	Atp1b1
10357833	Atp2b4	10600180	Atp2b3
10600169	Bgn	10464251	Atrnl1
10369844	Bicc1	10559177	B130016D09Rik
10369842	Bicc1	10510019	B330016D10Rik
10427436	C7	10357875	Btg2
10466622	C730037M02Rik	10490903	Car13
10494804	Casq2	10363379	Cbara1
10580469	Cbln1	10375313	Ccnjl
10436196	Cd47	10427862	Cdh6
10436182	Cd47	10541260	Cecr2
10453049	Cdc42ep3	10402473	Clmn
10496204	Cenpe	10493108	Crabp2
10503208	Chd7	10355193	Crygc
10502552	Clca1	10544199	Dennd2a
10502565	Clca2	10505911	Dmrta1
10508151	Clspn	10388465	Doc2b
10576973	Col4a1	10428619	Enpp2
10570068	Col4a2	10437451	Fam100a
10521602	Cpeb2	10397346	Fos
10485117	Creb3l1	10513536	Gm2173
10348451	Cxcr7	10597918	Gm9856
10585794	Cyp11a1	10542335	Gprc5a
10468239	Cyp17a1	10453811	Greb1l
10474825	D2Ertd750e	10427280	Hoxc10
10396270	Dact1	10580183	Ier2
10578241	Dlc1	10436865	Ifngr2
10591630	Dock6	10355500	Igfbp5
10368647	Dse	10472820	Itga6
10563780	E2f8	10530692	Kdr
10579812	Ednra	10427052	Krt7
10452419	Efna5	10557229	LOC100134980
10427496	Egflam	10502774	Lphn2
10406817	Enc1	10607225	Lrch2
10502081	Enpep	10474096	Lrrc4c
10606071	Ercc6l	10446928	Ltbp1
10461723	Fam111a	10521796	Mir218-1
10459335	Fam38b	10523161	Mthfd2l
10404152	Fam65b	10377148	Myh8
10604175	Fam70a	10531370	Naaa
10591125	Fat3	10573779	Nkd1
10591090	Fat3	10401382	Numb
10591092	Fat3	10601569	Pcdh11x
10591112	Fat3	10492689	Pdgfc
10591114	Fat3	10536294	Peg10
10591116	Fat3	10550509	Pglyrp1
10591118	Fat3	10367945	Phactr2
10591131	Fat3	10411782	Pik3r1
10591135	Fat3	10433887	Pkp2
10591129	Fat3	10577792	Plekha2
10591120	Fat3	10359624	Prrx1
10591123	Fat3	10462102	Ptar1
10591127	Fat3	10554800	Rab38
10487040	Fbn1	10358389	Rgs2
10593483	Fdx1	10351463	Rgs5
10603099	Figf	10351455	Rgs5
10362499	Frk	10476759	Rin2
10484307	Frzb	10383233	Rnf213
10503334	Gem	10383214	Rnf213
10447097	Gemin6	10607467	Sat1
10373179	Gli1	10476740	Slc24a3
10357137	Gli2	10602756	Smpx
10504450	Glipr2	10356329	Snora75
10346321	Gm10561	10356333	Snord82
10461856	Gna14	10531931	Sparcl1
10571815	Gpm6a	10372891	Srgap1
10373325	Gpr182	10546855	Srgap3
10376201	Gpx3	10542740	Sspn
10590663	Gria4	10502890	St6galnac3
10464425	Grk5	10549162	St8sia1
10519857	Hgf	10361078	Tatdn3
10579894	Hhip	10470936	Tbc1d13
10358621	Hmcn1	10405587	Tgfbi
10358611	Hmcn1	10349529	Thsd7b
10358595	Hmcn1	10352725	Tmem206
10358543	Hmcn1	10606658	Trmt2b
10358541	Hmcn1	10417912	Usp54
10358633	Hmcn1	10474295	Wt1
10472958	Hoxd10	10448247	Zfp40
10574780	Hsd11b2	10516020	Zmpste24
10500565	Hsd3b1
10384223	Igfbp3
10530841	Igfbp7
10345777	Il1rl2
10403743	Inhba
10594044	Islr
10395394	Ispd
10473125	Itga4
10590031	Itga9
10469151	Itih5
10567297	Itpripl2
10488060	Jag1
10544148	Jhdm1d
10514576	Kank4
10350297	Kif14
10525591	Kntc1
10368409	Lama2
10416215	Loxl2
10538087	Lrrc61
10369752	Lrrtm3
10559207	Lsp1
10561212	Ltbp4
10459611	Mc2r
10376778	Mfap4
10556381	Mical2
10492355	Mme
10366994	Myo1a
10467258	Myof
10403584	Nid1
10578045	Nrg1
10346843	Nrp2
10548038	Ntf3
10372139	Nts
10359890	Nuf2
10556076	Olfml1
10423654	Osr2
10505120	Palm2
10480347	Pip4k2a
10476443	Plcb4
10489569	Pltp
10551736	Ppp1r14a
10538811	Prdm5
10423049	Prlr
10487937	Prokr2
10436456	Pros1
10424607	Ptp4a3
10355050	Raph1
10349922	Ren1
10548899	Rerg
10520080	Rint1
10440344	Robo2
10503382	Runx1t1
10405179	S1pr3
10483353	Scn7a
10569129	Sct
10576883	Shcbp1
10383731	Smtn
10558919	Snora52
10593878	Snx33
10529515	Sorcs2
10463875	Sorcs3
10395389	Sostdc1
10473160	Ssfa2
10378855	Ssh2
10476886	Sstr4
10564624	St8sia2
10571054	Star
10416181	Stc1
10578574	Stox2
10578572	Stox2
10602020	Tbc1d8b
10368240	Tcf21
10551185	Tgfb1
10532085	Tgfbr3
10488378	Thbd
10554667	Tmc3
10346150	Tmeff2
10396161	Tmx1
10513739	Tnc
10350173	Tnnt2
10362615	Traf3ip2
10395320	Twist1
10586017	Uaca
10501608	Vcam1
10524874	Vsig10
10424252	Wdyhv1
10482448	Zeb2

## Sheet: (D) Gene lists
E10.5 Sf1 primed, removing E12.5 interstitial/stromal genes,
becoming sexually dimorphic by E11.0
♂		♀
ID	Gene name	ID	Gene name
---		---
E11.0 Sf1 primed, removing E12.5 interstitial/stromal genes,
becoming sexually dimorphic by E11.5
♂		♀
ID	Gene name	ID	Gene name
1433607_at	Cbln4	1432031_at	4930563E18Rik
1424950_at	Sox9	1451095_at	Asns
1451538_at	Sox9	1433966_x_at	Asns
		1455991_at	Ccbl2
		1424638_at	Cdkn1a
		1434458_at	Fst
		1421365_at	Fst
		1438672_at	Parvb
		1437113_s_at	Pld1
		1428089_at	Slitrk1
		1440150_at	Tgm3

## Sheet: (E) Gene lists
E10.5 Sf1 primed genes (after removing E12.5 interstitial/stromal genes) that are
identically expressed in ♂ and ♀, but changing expression level similarly in both sexes
♂		♀
ID	Gene name	ID	Gene name
1448466_at	Cdca5	1447839_x_at	Adm
1435494_s_at	Dsp	1416077_at	Adm
1435493_at	Dsp	1433743_at	Dach1
1417403_at	Elovl6	1440000_at	E330013P04Rik
1427541_x_at	Hmmr	1448601_s_at	Msx1
1416558_at	Melk	1425784_a_at	Olfm1
1427100_at	Metrn	1433431_at	Pnlip
1434195_at	Prss35	1436365_at	Zbtb7c
1417323_at	Psrc1
1451092_a_at	Rangap1
1439500_at	Scrn1
1450496_a_at	Ska1
1428104_at	Tpx2
E11.0 Sf1 primed genes (after removing E12.5 interstitial/stromal genes) that are
identically expressed in ♂ and ♀, but changing expression level similarly in both sexes
♂		♀
ID	Gene name	ID	Gene name
1417911_at	Ccna2	1417110_at	Man1a
1435054_at	Eme1
1429233_at	Sept11

## Sheet: (F) Gene lists
Genes primed in Sry-EGFP/Sox9-ECFP and Sf1-EGFP cells
E11.0 ♂	E11.0 ♀
Gene name	Gene name
Mad2l1	Aldoc
Sel1l3	Cachd1
	Cav1
	Dapk1
	Gata6
	Ifitm1
	Rnf128
	Setd7
	Soat1
	Tnfrsf19
Genes primed in Sf1-EGFP cells and sexually dimorphic
in Sry-EGFP/Sox9-ECFP cells at E11.5
E11.0 ♂	E11.0 ♀
Gene name	Gene name
Adh1	Actr6
Atp2a2	Adk
Camkk2	Adm
Cbln4	Arhgap29
Ccna2	Asns
Epha4	B4galt5
Hmmr	Ccbl2
Mthfd2	Cdk14
Nsdhl	Cdkn1a
Pak3	Cdkn1c
Rap2a	Dclk1
Robo1	Dock4
Rragd	Dock9
Scd2	Dsc2
Scrn1	E330013P04Rik
Sept11	Emx2
Sox9	Ern1
	F11r
	Frmd6
	Fst
	Gabra4
	Gbp2
	Gk5
	Igf1
	Inpp5f
	Kdm3a
	Klhl5
	Lhpp
	Lypd6
	Msx1
	Parvb
	Pde7a
	Pik3r3
	Pld1
	Plxna2
	Pnlip
	Podxl
	Polr2g
	Prkcd
	Rab11fip2
	Rps6ka3
	Rspo1
	Slitrk1
	Stx18
	Tgm3
	Tmem218
	Wnt4
	Zfp277
Genes primed in Sf1-EGFP cells and sexually dimorphic
in Sry-EGFP/Sox9-ECFP cells at E11.5 with indications of previous priming
E11.0 ♂	E11.0 ♀
Gene name	Gene name
Camkk2	Actr6
Cbln4	Adk
Hmmr	Arhgap29
Robo1	Cdkn1c
Sept11	Dock4
	Dsc2
	E330013P04Rik
	Emx2
	Frmd6
	Fst
	Gabra4
	Igf1
	Kdm3a
	Parvb
	Pik3r3
	Podxl
	Rps6ka3
	Rspo1
